# Supplementary material for: Spatial Transcriptomics of Perineural Invasion in Pancreatic Ductal Adenocarcinomas
Source: Research Square preprint supplement (doi:10.21203/rs.3.rs-5253213/v1), 2024-12-02
Supplement: Supplementary file 1 [file 0bb5c93724309f02a2d890e8.xlsx]

## Sheet: BSR_Inf
Supplementary Table 10. BulkSignalR, receptor, ligand and pathways with significant differential expression in the nerve component of PNI foci compared to non-PNI.
	L	R	pw.id	pw.name	pval	qval	L.logFC	R.logFC	LR.pval	LR.corr	rank	len	rank.pval	rank.corr	LR.score	L.expr	R.expr
1	ADAM9	ITGAV	R-HSA-1566948	Elastic fibre formation	3.65859e-07	7.4294e-07	0.682951	0.705837	5.72586e-07	1	7	13	0.548271	1	0.542651	6.11748	7.40557
2	ADAM9	ITGAV	R-HSA-194138	Signaling by VEGF	1.88138e-08	1.15272e-07	0.682951	0.705837	5.72586e-07	1	37	68	0.355081	1	0.542651	6.11748	7.40557
3	ADAM9	ITGAV	R-HSA-202733	Cell surface interactions at the vascular wall	2.92145e-07	6.57822e-07	0.682951	0.705837	5.72586e-07	1	18	34	0.487619	1	0.542651	6.11748	7.40557
4	ADAM9	ITGAV	R-HSA-210990	PECAM1 interactions	1.32625e-07	4.10271e-07	0.682951	0.705837	5.72586e-07	1	4	8	0.434525	1	0.542651	6.11748	7.40557
5	ADAM9	ITGAV	R-HSA-2129379	Molecules associated with elastic fibres	4.12573e-07	7.89374e-07	0.682951	0.705837	5.72586e-07	1	4	9	0.696036	1	0.542651	6.11748	7.40557
6	ADAM9	ITGAV	R-HSA-216083	Integrin cell surface interactions	4.43352e-07	8.15275e-07	0.682951	0.705837	5.72586e-07	1	9	18	0.61343	1	0.542651	6.11748	7.40557
7	ADAM9	ITGAV	R-HSA-3000157	Laminin interactions	3.83472e-07	7.59304e-07	0.682951	0.705837	5.72586e-07	1	4	8	0.633202	1	0.542651	6.11748	7.40557
8	ADAM9	ITGAV	R-HSA-3000170	Syndecan interactions	4.21959e-07	7.9902e-07	0.682951	0.705837	5.72586e-07	1	3	6	0.696036	1	0.542651	6.11748	7.40557
9	ADAM9	ITGAV	R-HSA-3000171	Non-integrin membrane-ECM interactions	5.15836e-07	9.27944e-07	0.682951	0.705837	5.72586e-07	1	7	14	0.696036	1	0.542651	6.11748	7.40557
10	ADAM9	ITGAV	R-HSA-3000178	ECM proteoglycans	5.35766e-07	9.30431e-07	0.682951	0.705837	5.72586e-07	1	9	18	0.696036	1	0.542651	6.11748	7.40557
11	ADAM9	ITGAV	R-HSA-373760	L1CAM interactions	1.0656e-08	7.50457e-08	0.682951	0.705837	5.72586e-07	1	15	29	0.315086	1	0.542651	6.11748	7.40557
12	ADAM9	ITGAV	R-HSA-4420097	VEGFA-VEGFR2 Pathway	2.27649e-08	1.33261e-07	0.682951	0.705837	5.72586e-07	1	36	67	0.365867	1	0.542651	6.11748	7.40557
13	ADAM9	ITGAV	R-HSA-445144	Signal transduction by L1	3.53568e-08	1.77319e-07	0.682951	0.705837	5.72586e-07	1	4	9	0.360667	1	0.542651	6.11748	7.40557
21	ADAM9	ITGB1	R-HSA-1500931	Cell-Cell communication	1.57735e-08	9.85098e-08	0.682951	0.710994	3.29964e-07	1	7	14	0.322464	1	0.542564	6.11748	7.40039
22	ADAM9	ITGB1	R-HSA-1566948	Elastic fibre formation	1.72252e-07	4.95786e-07	0.682951	0.710994	3.29964e-07	1	6	12	0.548271	1	0.542564	6.11748	7.40039
23	ADAM9	ITGB1	R-HSA-1566977	Fibronectin matrix formation	1.97067e-07	5.39083e-07	0.682951	0.710994	3.29964e-07	1	1	2	0.772811	1	0.542564	6.11748	7.40039
24	ADAM9	ITGB1	R-HSA-195258	RHO GTPase Effectors	2.19781e-09	3.09992e-08	0.682951	0.710994	3.29964e-07	1	102	186	0.365867	1	0.542564	6.11748	7.40039
25	ADAM9	ITGB1	R-HSA-198933	Immunoregulatory interactions between a Lymphoid and a non-Lymphoid cell	4.86353e-08	2.20525e-07	0.682951	0.710994	3.29964e-07	1	1	3	0.528237	1	0.542564	6.11748	7.40039
26	ADAM9	ITGB1	R-HSA-202733	Cell surface interactions at the vascular wall	1.04562e-08	7.50457e-08	0.682951	0.710994	3.29964e-07	1	22	40	0.322464	1	0.542564	6.11748	7.40039
27	ADAM9	ITGB1	R-HSA-210991	Basigin interactions	9.08256e-11	6.57509e-09	0.682951	0.710994	3.29964e-07	1	6	11	0.0987146	1	0.542564	6.11748	7.40039
28	ADAM9	ITGB1	R-HSA-2129379	Molecules associated with elastic fibres	8.11886e-08	2.98594e-07	0.682951	0.710994	3.29964e-07	1	3	6	0.444383	1	0.542564	6.11748	7.40039
29	ADAM9	ITGB1	R-HSA-216083	Integrin cell surface interactions	3.77625e-09	4.11927e-08	0.682951	0.710994	3.29964e-07	1	19	35	0.290471	1	0.542564	6.11748	7.40039
210	ADAM9	ITGB1	R-HSA-3000157	Laminin interactions	2.25067e-07	5.86591e-07	0.682951	0.710994	3.29964e-07	1	11	20	0.527682	1	0.542564	6.11748	7.40039
211	ADAM9	ITGB1	R-HSA-3000170	Syndecan interactions	2.63522e-07	6.52715e-07	0.682951	0.710994	3.29964e-07	1	4	8	0.696036	1	0.542564	6.11748	7.40039
212	ADAM9	ITGB1	R-HSA-3000171	Non-integrin membrane-ECM interactions	3.21149e-07	6.8698e-07	0.682951	0.710994	3.29964e-07	1	12	23	0.691516	1	0.542564	6.11748	7.40039
213	ADAM9	ITGB1	R-HSA-3000178	ECM proteoglycans	3.26518e-07	6.90337e-07	0.682951	0.710994	3.29964e-07	1	15	29	0.703356	1	0.542564	6.11748	7.40039
214	ADAM9	ITGB1	R-HSA-373755	Semaphorin interactions	7.10282e-09	5.5977e-08	0.682951	0.710994	3.29964e-07	1	22	41	0.32431	1	0.542564	6.11748	7.40039
215	ADAM9	ITGB1	R-HSA-373760	L1CAM interactions	1.01947e-08	7.50457e-08	0.682951	0.710994	3.29964e-07	1	18	33	0.315086	1	0.542564	6.11748	7.40039
216	ADAM9	ITGB1	R-HSA-416700	Other semaphorin interactions	2.50485e-08	1.37285e-07	0.682951	0.710994	3.29964e-07	1	1	2	0.275523	1	0.542564	6.11748	7.40039
217	ADAM9	ITGB1	R-HSA-445144	Signal transduction by L1	5.09695e-08	2.27018e-07	0.682951	0.710994	3.29964e-07	1	5	10	0.392811	1	0.542564	6.11748	7.40039
218	ADAM9	ITGB1	R-HSA-446728	Cell junction organization	7.34527e-08	2.85405e-07	0.682951	0.710994	3.29964e-07	1	2	4	0.435604	1	0.542564	6.11748	7.40039
219	ADAM9	ITGB1	R-HSA-447041	CHL1 interactions	2.53002e-08	1.37285e-07	0.682951	0.710994	3.29964e-07	1	2	4	0.290471	1	0.542564	6.11748	7.40039
220	ADAM9	ITGB1	R-HSA-5663220	RHO GTPases Activate Formins	3.00121e-07	6.66712e-07	0.682951	0.710994	3.29964e-07	1	1	2	0.953708	1	0.542564	6.11748	7.40039
221	ADAM9	ITGB1	R-HSA-6785807	Interleukin-4 and Interleukin-13 signaling	5.85951e-08	2.5062e-07	0.682951	0.710994	3.29964e-07	1	56	102	0.410879	1	0.542564	6.11748	7.40039
222	ADAM9	ITGB1	R-HSA-6806834	Signaling by MET	2.83437e-07	6.5542e-07	0.682951	0.710994	3.29964e-07	1	23	42	0.546953	1	0.542564	6.11748	7.40039
223	ADAM9	ITGB1	R-HSA-75892	Platelet Adhesion to exposed collagen	1.14813e-07	3.74227e-07	0.682951	0.710994	3.29964e-07	1	1	3	0.703356	1	0.542564	6.11748	7.40039
224	ADAM9	ITGB1	R-HSA-8874081	MET activates PTK2 signaling	2.64922e-07	6.52715e-07	0.682951	0.710994	3.29964e-07	1	8	16	0.633202	1	0.542564	6.11748	7.40039
225	ADAM9	ITGB1	R-HSA-8875513	MET interacts with TNS proteins	1.04848e-07	3.65312e-07	0.682951	0.710994	3.29964e-07	1	1	3	0.682388	1	0.542564	6.11748	7.40039
226	ADAM9	ITGB1	R-HSA-8875878	MET promotes cell motility	2.38179e-07	6.14019e-07	0.682951	0.710994	3.29964e-07	1	12	23	0.560448	1	0.542564	6.11748	7.40039
31	CALR	ITGAV	R-HSA-1566948	Elastic fibre formation	5.44529e-06	6.21515e-06	0.452609	0.705837	8.52215e-06	1	7	13	0.548271	1	0.592737	9.20448	7.40557
32	CALR	ITGAV	R-HSA-194138	Signaling by VEGF	2.80017e-07	6.52715e-07	0.452609	0.705837	8.52215e-06	1	37	68	0.355081	1	0.592737	9.20448	7.40557
33	CALR	ITGAV	R-HSA-202733	Cell surface interactions at the vascular wall	4.34816e-06	5.23361e-06	0.452609	0.705837	8.52215e-06	1	18	34	0.487619	1	0.592737	9.20448	7.40557
34	CALR	ITGAV	R-HSA-210990	PECAM1 interactions	1.97394e-06	2.76854e-06	0.452609	0.705837	8.52215e-06	1	4	8	0.434525	1	0.592737	9.20448	7.40557
35	CALR	ITGAV	R-HSA-2129379	Molecules associated with elastic fibres	6.14057e-06	6.79606e-06	0.452609	0.705837	8.52215e-06	1	4	9	0.696036	1	0.592737	9.20448	7.40557
36	CALR	ITGAV	R-HSA-216083	Integrin cell surface interactions	6.59867e-06	7.11453e-06	0.452609	0.705837	8.52215e-06	1	9	18	0.61343	1	0.592737	9.20448	7.40557
37	CALR	ITGAV	R-HSA-3000157	Laminin interactions	5.70744e-06	6.40394e-06	0.452609	0.705837	8.52215e-06	1	4	8	0.633202	1	0.592737	9.20448	7.40557
38	CALR	ITGAV	R-HSA-3000170	Syndecan interactions	6.28026e-06	6.88333e-06	0.452609	0.705837	8.52215e-06	1	3	6	0.696036	1	0.592737	9.20448	7.40557
39	CALR	ITGAV	R-HSA-3000171	Non-integrin membrane-ECM interactions	7.6775e-06	8.04193e-06	0.452609	0.705837	8.52215e-06	1	7	14	0.696036	1	0.592737	9.20448	7.40557
310	CALR	ITGAV	R-HSA-3000178	ECM proteoglycans	7.97413e-06	8.24824e-06	0.452609	0.705837	8.52215e-06	1	9	18	0.696036	1	0.592737	9.20448	7.40557
311	CALR	ITGAV	R-HSA-373760	L1CAM interactions	1.586e-07	4.72943e-07	0.452609	0.705837	8.52215e-06	1	15	29	0.315086	1	0.592737	9.20448	7.40557
312	CALR	ITGAV	R-HSA-4420097	VEGFA-VEGFR2 Pathway	3.38824e-07	7.0535e-07	0.452609	0.705837	8.52215e-06	1	36	67	0.365867	1	0.592737	9.20448	7.40557
313	CALR	ITGAV	R-HSA-445144	Signal transduction by L1	5.26236e-07	9.30431e-07	0.452609	0.705837	8.52215e-06	1	4	9	0.360667	1	0.592737	9.20448	7.40557
41	COL1A1	ITGAV	R-HSA-1566948	Elastic fibre formation	6.17863e-06	6.79606e-06	1.25249	0.705837	9.66985e-06	1	7	13	0.548271	1	0.569466	7.60236	7.40557
42	COL1A1	ITGAV	R-HSA-194138	Signaling by VEGF	3.17728e-07	6.8698e-07	1.25249	0.705837	9.66985e-06	1	37	68	0.355081	1	0.569466	7.60236	7.40557
43	COL1A1	ITGAV	R-HSA-202733	Cell surface interactions at the vascular wall	4.93375e-06	5.75025e-06	1.25249	0.705837	9.66985e-06	1	18	34	0.487619	1	0.569466	7.60236	7.40557
44	COL1A1	ITGAV	R-HSA-210990	PECAM1 interactions	2.23978e-06	3.0509e-06	1.25249	0.705837	9.66985e-06	1	4	8	0.434525	1	0.569466	7.60236	7.40557
45	COL1A1	ITGAV	R-HSA-2129379	Molecules associated with elastic fibres	6.96755e-06	7.43025e-06	1.25249	0.705837	9.66985e-06	1	4	9	0.696036	1	0.569466	7.60236	7.40557
46	COL1A1	ITGAV	R-HSA-216083	Integrin cell surface interactions	7.48733e-06	7.86764e-06	1.25249	0.705837	9.66985e-06	1	9	18	0.61343	1	0.569466	7.60236	7.40557
47	COL1A1	ITGAV	R-HSA-3000157	Laminin interactions	6.47608e-06	7.05126e-06	1.25249	0.705837	9.66985e-06	1	4	8	0.633202	1	0.569466	7.60236	7.40557
48	COL1A1	ITGAV	R-HSA-3000170	Syndecan interactions	7.12605e-06	7.56e-06	1.25249	0.705837	9.66985e-06	1	3	6	0.696036	1	0.569466	7.60236	7.40557
49	COL1A1	ITGAV	R-HSA-3000171	Non-integrin membrane-ECM interactions	8.71145e-06	8.92721e-06	1.25249	0.705837	9.66985e-06	1	7	14	0.696036	1	0.569466	7.60236	7.40557
410	COL1A1	ITGAV	R-HSA-3000178	ECM proteoglycans	9.04804e-06	9.15872e-06	1.25249	0.705837	9.66985e-06	1	9	18	0.696036	1	0.569466	7.60236	7.40557
411	COL1A1	ITGAV	R-HSA-373760	L1CAM interactions	1.79959e-07	5.04801e-07	1.25249	0.705837	9.66985e-06	1	15	29	0.315086	1	0.569466	7.60236	7.40557
412	COL1A1	ITGAV	R-HSA-4420097	VEGFA-VEGFR2 Pathway	3.84454e-07	7.59304e-07	1.25249	0.705837	9.66985e-06	1	36	67	0.365867	1	0.569466	7.60236	7.40557
413	COL1A1	ITGAV	R-HSA-445144	Signal transduction by L1	5.97106e-07	1.01355e-06	1.25249	0.705837	9.66985e-06	1	4	9	0.360667	1	0.569466	7.60236	7.40557
51	COL1A1	ITGB1	R-HSA-1500931	Cell-Cell communication	2.66383e-07	6.52715e-07	1.25249	0.710994	5.57244e-06	1	7	14	0.322464	1	0.569381	7.60236	7.40039
52	COL1A1	ITGB1	R-HSA-1566948	Elastic fibre formation	2.909e-06	3.79086e-06	1.25249	0.710994	5.57244e-06	1	6	12	0.548271	1	0.569381	7.60236	7.40039
53	COL1A1	ITGB1	R-HSA-1566977	Fibronectin matrix formation	3.32806e-06	4.18855e-06	1.25249	0.710994	5.57244e-06	1	1	2	0.772811	1	0.569381	7.60236	7.40039
54	COL1A1	ITGB1	R-HSA-195258	RHO GTPase Effectors	3.71166e-08	1.78052e-07	1.25249	0.710994	5.57244e-06	1	102	186	0.365867	1	0.569381	7.60236	7.40039
55	COL1A1	ITGB1	R-HSA-198933	Immunoregulatory interactions between a Lymphoid and a non-Lymphoid cell	8.21354e-07	1.30081e-06	1.25249	0.710994	5.57244e-06	1	1	3	0.528237	1	0.569381	7.60236	7.40039
56	COL1A1	ITGB1	R-HSA-202733	Cell surface interactions at the vascular wall	1.76585e-07	4.99569e-07	1.25249	0.710994	5.57244e-06	1	22	40	0.322464	1	0.569381	7.60236	7.40039
57	COL1A1	ITGB1	R-HSA-210991	Basigin interactions	1.53386e-09	2.63047e-08	1.25249	0.710994	5.57244e-06	1	6	11	0.0987146	1	0.569381	7.60236	7.40039
58	COL1A1	ITGB1	R-HSA-2129379	Molecules associated with elastic fibres	1.37111e-06	2.03515e-06	1.25249	0.710994	5.57244e-06	1	3	6	0.444383	1	0.569381	7.60236	7.40039
59	COL1A1	ITGB1	R-HSA-216083	Integrin cell surface interactions	6.37734e-08	2.60038e-07	1.25249	0.710994	5.57244e-06	1	19	35	0.290471	1	0.569381	7.60236	7.40039
510	COL1A1	ITGB1	R-HSA-3000157	Laminin interactions	3.80093e-06	4.65966e-06	1.25249	0.710994	5.57244e-06	1	11	20	0.527682	1	0.569381	7.60236	7.40039
511	COL1A1	ITGB1	R-HSA-3000170	Syndecan interactions	4.45037e-06	5.33722e-06	1.25249	0.710994	5.57244e-06	1	4	8	0.696036	1	0.569381	7.60236	7.40039
512	COL1A1	ITGB1	R-HSA-3000171	Non-integrin membrane-ECM interactions	5.42357e-06	6.21177e-06	1.25249	0.710994	5.57244e-06	1	12	23	0.691516	1	0.569381	7.60236	7.40039
513	COL1A1	ITGB1	R-HSA-3000178	ECM proteoglycans	5.51424e-06	6.27222e-06	1.25249	0.710994	5.57244e-06	1	15	29	0.703356	1	0.569381	7.60236	7.40039
514	COL1A1	ITGB1	R-HSA-373755	Semaphorin interactions	1.19953e-07	3.78136e-07	1.25249	0.710994	5.57244e-06	1	22	41	0.32431	1	0.569381	7.60236	7.40039
515	COL1A1	ITGB1	R-HSA-373760	L1CAM interactions	1.72169e-07	4.95786e-07	1.25249	0.710994	5.57244e-06	1	18	33	0.315086	1	0.569381	7.60236	7.40039
516	COL1A1	ITGB1	R-HSA-416700	Other semaphorin interactions	4.2302e-07	7.9902e-07	1.25249	0.710994	5.57244e-06	1	1	2	0.275523	1	0.569381	7.60236	7.40039
517	COL1A1	ITGB1	R-HSA-445144	Signal transduction by L1	8.60773e-07	1.35674e-06	1.25249	0.710994	5.57244e-06	1	5	10	0.392811	1	0.569381	7.60236	7.40039
518	COL1A1	ITGB1	R-HSA-446728	Cell junction organization	1.24047e-06	1.87082e-06	1.25249	0.710994	5.57244e-06	1	2	4	0.435604	1	0.569381	7.60236	7.40039
519	COL1A1	ITGB1	R-HSA-447041	CHL1 interactions	4.2727e-07	7.9902e-07	1.25249	0.710994	5.57244e-06	1	2	4	0.290471	1	0.569381	7.60236	7.40039
520	COL1A1	ITGB1	R-HSA-5663220	RHO GTPases Activate Formins	5.06846e-06	5.8455e-06	1.25249	0.710994	5.57244e-06	1	1	2	0.953708	1	0.569381	7.60236	7.40039
521	COL1A1	ITGB1	R-HSA-6785807	Interleukin-4 and Interleukin-13 signaling	9.89555e-07	1.53776e-06	1.25249	0.710994	5.57244e-06	1	56	102	0.410879	1	0.569381	7.60236	7.40039
522	COL1A1	ITGB1	R-HSA-6806834	Signaling by MET	4.78669e-06	5.61842e-06	1.25249	0.710994	5.57244e-06	1	23	42	0.546953	1	0.569381	7.60236	7.40039
523	COL1A1	ITGB1	R-HSA-75892	Platelet Adhesion to exposed collagen	1.93897e-06	2.73106e-06	1.25249	0.710994	5.57244e-06	1	1	3	0.703356	1	0.569381	7.60236	7.40039
524	COL1A1	ITGB1	R-HSA-8874081	MET activates PTK2 signaling	4.474e-06	5.34619e-06	1.25249	0.710994	5.57244e-06	1	8	16	0.633202	1	0.569381	7.60236	7.40039
525	COL1A1	ITGB1	R-HSA-8875513	MET interacts with TNS proteins	1.77068e-06	2.52627e-06	1.25249	0.710994	5.57244e-06	1	1	3	0.682388	1	0.569381	7.60236	7.40039
526	COL1A1	ITGB1	R-HSA-8875878	MET promotes cell motility	4.02238e-06	4.91027e-06	1.25249	0.710994	5.57244e-06	1	12	23	0.560448	1	0.569381	7.60236	7.40039
61	COL7A1	ITGB1	R-HSA-1500931	Cell-Cell communication	4.33124e-07	8.05416e-07	0.429529	0.710994	9.06048e-06	1	7	14	0.322464	1	0.536123	5.80834	7.40039
62	COL7A1	ITGB1	R-HSA-1566948	Elastic fibre formation	4.72987e-06	5.59139e-06	0.429529	0.710994	9.06048e-06	1	6	12	0.548271	1	0.536123	5.80834	7.40039
63	COL7A1	ITGB1	R-HSA-1566977	Fibronectin matrix formation	5.41125e-06	6.21177e-06	0.429529	0.710994	9.06048e-06	1	1	2	0.772811	1	0.536123	5.80834	7.40039
64	COL7A1	ITGB1	R-HSA-195258	RHO GTPase Effectors	6.03497e-08	2.52857e-07	0.429529	0.710994	9.06048e-06	1	102	186	0.365867	1	0.536123	5.80834	7.40039
65	COL7A1	ITGB1	R-HSA-198933	Immunoregulatory interactions between a Lymphoid and a non-Lymphoid cell	1.33548e-06	1.99119e-06	0.429529	0.710994	9.06048e-06	1	1	3	0.528237	1	0.536123	5.80834	7.40039
66	COL7A1	ITGB1	R-HSA-202733	Cell surface interactions at the vascular wall	2.87117e-07	6.5542e-07	0.429529	0.710994	9.06048e-06	1	22	40	0.322464	1	0.536123	5.80834	7.40039
67	COL7A1	ITGB1	R-HSA-210991	Basigin interactions	2.49398e-09	3.27178e-08	0.429529	0.710994	9.06048e-06	1	6	11	0.0987146	1	0.536123	5.80834	7.40039
68	COL7A1	ITGB1	R-HSA-2129379	Molecules associated with elastic fibres	2.22936e-06	3.04925e-06	0.429529	0.710994	9.06048e-06	1	3	6	0.444383	1	0.536123	5.80834	7.40039
69	COL7A1	ITGB1	R-HSA-216083	Integrin cell surface interactions	1.03692e-07	3.65129e-07	0.429529	0.710994	9.06048e-06	1	19	35	0.290471	1	0.536123	5.80834	7.40039
610	COL7A1	ITGB1	R-HSA-3000157	Laminin interactions	6.18011e-06	6.79606e-06	0.429529	0.710994	9.06048e-06	1	11	20	0.527682	1	0.536123	5.80834	7.40039
611	COL7A1	ITGB1	R-HSA-3000170	Syndecan interactions	7.23606e-06	7.6522e-06	0.429529	0.710994	9.06048e-06	1	4	8	0.696036	1	0.536123	5.80834	7.40039
612	COL7A1	ITGB1	R-HSA-3000171	Non-integrin membrane-ECM interactions	8.81843e-06	8.98123e-06	0.429529	0.710994	9.06048e-06	1	12	23	0.691516	1	0.536123	5.80834	7.40039
613	COL7A1	ITGB1	R-HSA-3000178	ECM proteoglycans	8.96587e-06	9.10338e-06	0.429529	0.710994	9.06048e-06	1	15	29	0.703356	1	0.536123	5.80834	7.40039
614	COL7A1	ITGB1	R-HSA-373755	Semaphorin interactions	1.95036e-07	5.37975e-07	0.429529	0.710994	9.06048e-06	1	22	41	0.32431	1	0.536123	5.80834	7.40039
615	COL7A1	ITGB1	R-HSA-373760	L1CAM interactions	2.79938e-07	6.52715e-07	0.429529	0.710994	9.06048e-06	1	18	33	0.315086	1	0.536123	5.80834	7.40039
616	COL7A1	ITGB1	R-HSA-416700	Other semaphorin interactions	6.87808e-07	1.13266e-06	0.429529	0.710994	9.06048e-06	1	1	2	0.275523	1	0.536123	5.80834	7.40039
617	COL7A1	ITGB1	R-HSA-445144	Signal transduction by L1	1.39957e-06	2.06812e-06	0.429529	0.710994	9.06048e-06	1	5	10	0.392811	1	0.536123	5.80834	7.40039
618	COL7A1	ITGB1	R-HSA-446728	Cell junction organization	2.01694e-06	2.81691e-06	0.429529	0.710994	9.06048e-06	1	2	4	0.435604	1	0.536123	5.80834	7.40039
619	COL7A1	ITGB1	R-HSA-447041	CHL1 interactions	6.94719e-07	1.13838e-06	0.429529	0.710994	9.06048e-06	1	2	4	0.290471	1	0.536123	5.80834	7.40039
620	COL7A1	ITGB1	R-HSA-5663220	RHO GTPases Activate Formins	8.24104e-06	8.49777e-06	0.429529	0.710994	9.06048e-06	1	1	2	0.953708	1	0.536123	5.80834	7.40039
621	COL7A1	ITGB1	R-HSA-6785807	Interleukin-4 and Interleukin-13 signaling	1.60896e-06	2.32562e-06	0.429529	0.710994	9.06048e-06	1	56	102	0.410879	1	0.536123	5.80834	7.40039
622	COL7A1	ITGB1	R-HSA-6806834	Signaling by MET	7.78291e-06	8.07568e-06	0.429529	0.710994	9.06048e-06	1	23	42	0.546953	1	0.536123	5.80834	7.40039
623	COL7A1	ITGB1	R-HSA-75892	Platelet Adhesion to exposed collagen	3.15266e-06	4.02908e-06	0.429529	0.710994	9.06048e-06	1	1	3	0.703356	1	0.536123	5.80834	7.40039
624	COL7A1	ITGB1	R-HSA-8874081	MET activates PTK2 signaling	7.27448e-06	7.66833e-06	0.429529	0.710994	9.06048e-06	1	8	16	0.633202	1	0.536123	5.80834	7.40039
625	COL7A1	ITGB1	R-HSA-8875513	MET interacts with TNS proteins	2.87902e-06	3.78157e-06	0.429529	0.710994	9.06048e-06	1	1	3	0.682388	1	0.536123	5.80834	7.40039
626	COL7A1	ITGB1	R-HSA-8875878	MET promotes cell motility	6.54017e-06	7.09769e-06	0.429529	0.710994	9.06048e-06	1	12	23	0.560448	1	0.536123	5.80834	7.40039
71	GDF7	BMPR2	R-HSA-201451	Signaling by BMP	0.000173553	0.000173553	0.517327	0.396896	0.000321963	1	7	14	0.547672	1	0.510932	5.69761	6.16424
72	GDF7	BMPR2	R-HSA-9006936	Signaling by TGF-beta family members	0.000124574	0.000124952	0.517327	0.396896	0.000321963	1	19	35	0.447686	1	0.510932	5.69761	6.16424
81	LAMB3	ITGB1	R-HSA-1500931	Cell-Cell communication	3.34729e-07	7.01236e-07	0.476656	0.710994	7.00216e-06	1	7	14	0.322464	1	0.533728	5.69759	7.40039
82	LAMB3	ITGB1	R-HSA-1566948	Elastic fibre formation	3.65536e-06	4.49786e-06	0.476656	0.710994	7.00216e-06	1	6	12	0.548271	1	0.533728	5.69759	7.40039
83	LAMB3	ITGB1	R-HSA-1566977	Fibronectin matrix formation	4.18195e-06	5.07042e-06	0.476656	0.710994	7.00216e-06	1	1	2	0.772811	1	0.533728	5.69759	7.40039
84	LAMB3	ITGB1	R-HSA-195258	RHO GTPase Effectors	4.66397e-08	2.14413e-07	0.476656	0.710994	7.00216e-06	1	102	186	0.365867	1	0.533728	5.69759	7.40039
85	LAMB3	ITGB1	R-HSA-198933	Immunoregulatory interactions between a Lymphoid and a non-Lymphoid cell	1.03209e-06	1.59636e-06	0.476656	0.710994	7.00216e-06	1	1	3	0.528237	1	0.533728	5.69759	7.40039
86	LAMB3	ITGB1	R-HSA-202733	Cell surface interactions at the vascular wall	2.21891e-07	5.82905e-07	0.476656	0.710994	7.00216e-06	1	22	40	0.322464	1	0.533728	5.69759	7.40039
87	LAMB3	ITGB1	R-HSA-210991	Basigin interactions	1.92741e-09	3.03796e-08	0.476656	0.710994	7.00216e-06	1	6	11	0.0987146	1	0.533728	5.69759	7.40039
88	LAMB3	ITGB1	R-HSA-2129379	Molecules associated with elastic fibres	1.7229e-06	2.46875e-06	0.476656	0.710994	7.00216e-06	1	3	6	0.444383	1	0.533728	5.69759	7.40039
89	LAMB3	ITGB1	R-HSA-216083	Integrin cell surface interactions	8.01358e-08	2.98033e-07	0.476656	0.710994	7.00216e-06	1	19	35	0.290471	1	0.533728	5.69759	7.40039
810	LAMB3	ITGB1	R-HSA-3000157	Laminin interactions	4.77614e-06	5.61842e-06	0.476656	0.710994	7.00216e-06	1	11	20	0.527682	1	0.533728	5.69759	7.40039
811	LAMB3	ITGB1	R-HSA-3000170	Syndecan interactions	5.59221e-06	6.33911e-06	0.476656	0.710994	7.00216e-06	1	4	8	0.696036	1	0.533728	5.69759	7.40039
812	LAMB3	ITGB1	R-HSA-3000171	Non-integrin membrane-ECM interactions	6.8151e-06	7.32402e-06	0.476656	0.710994	7.00216e-06	1	12	23	0.691516	1	0.533728	5.69759	7.40039
813	LAMB3	ITGB1	R-HSA-3000178	ECM proteoglycans	6.92904e-06	7.42237e-06	0.476656	0.710994	7.00216e-06	1	15	29	0.703356	1	0.533728	5.69759	7.40039
814	LAMB3	ITGB1	R-HSA-373755	Semaphorin interactions	1.50729e-07	4.57718e-07	0.476656	0.710994	7.00216e-06	1	22	41	0.32431	1	0.533728	5.69759	7.40039
815	LAMB3	ITGB1	R-HSA-373760	L1CAM interactions	2.16343e-07	5.72875e-07	0.476656	0.710994	7.00216e-06	1	18	33	0.315086	1	0.533728	5.69759	7.40039
816	LAMB3	ITGB1	R-HSA-416700	Other semaphorin interactions	5.31555e-07	9.30431e-07	0.476656	0.710994	7.00216e-06	1	1	2	0.275523	1	0.533728	5.69759	7.40039
817	LAMB3	ITGB1	R-HSA-445144	Signal transduction by L1	1.08162e-06	1.6652e-06	0.476656	0.710994	7.00216e-06	1	5	10	0.392811	1	0.533728	5.69759	7.40039
818	LAMB3	ITGB1	R-HSA-446728	Cell junction organization	1.55874e-06	2.26291e-06	0.476656	0.710994	7.00216e-06	1	2	4	0.435604	1	0.533728	5.69759	7.40039
819	LAMB3	ITGB1	R-HSA-447041	CHL1 interactions	5.36895e-07	9.30431e-07	0.476656	0.710994	7.00216e-06	1	2	4	0.290471	1	0.533728	5.69759	7.40039
820	LAMB3	ITGB1	R-HSA-5663220	RHO GTPases Activate Formins	6.36887e-06	6.95742e-06	0.476656	0.710994	7.00216e-06	1	1	2	0.953708	1	0.533728	5.69759	7.40039
821	LAMB3	ITGB1	R-HSA-6785807	Interleukin-4 and Interleukin-13 signaling	1.24345e-06	1.87082e-06	0.476656	0.710994	7.00216e-06	1	56	102	0.410879	1	0.533728	5.69759	7.40039
822	LAMB3	ITGB1	R-HSA-6806834	Signaling by MET	6.01482e-06	6.68089e-06	0.476656	0.710994	7.00216e-06	1	23	42	0.546953	1	0.533728	5.69759	7.40039
823	LAMB3	ITGB1	R-HSA-75892	Platelet Adhesion to exposed collagen	2.43646e-06	3.27832e-06	0.476656	0.710994	7.00216e-06	1	1	3	0.703356	1	0.533728	5.69759	7.40039
824	LAMB3	ITGB1	R-HSA-8874081	MET activates PTK2 signaling	5.6219e-06	6.35102e-06	0.476656	0.710994	7.00216e-06	1	8	16	0.633202	1	0.533728	5.69759	7.40039
825	LAMB3	ITGB1	R-HSA-8875513	MET interacts with TNS proteins	2.22498e-06	3.04925e-06	0.476656	0.710994	7.00216e-06	1	1	3	0.682388	1	0.533728	5.69759	7.40039
826	LAMB3	ITGB1	R-HSA-8875878	MET promotes cell motility	5.0544e-06	5.8455e-06	0.476656	0.710994	7.00216e-06	1	12	23	0.560448	1	0.533728	5.69759	7.40039
91	SPP1	ITGAV	R-HSA-1566948	Elastic fibre formation	5.32274e-07	9.30431e-07	0.666498	0.705837	8.33034e-07	1	7	13	0.548271	1	0.543294	6.14927	7.40557
92	SPP1	ITGAV	R-HSA-194138	Signaling by VEGF	2.73715e-08	1.46128e-07	0.666498	0.705837	8.33034e-07	1	37	68	0.355081	1	0.543294	6.14927	7.40557
93	SPP1	ITGAV	R-HSA-202733	Cell surface interactions at the vascular wall	4.2503e-07	7.9902e-07	0.666498	0.705837	8.33034e-07	1	18	34	0.487619	1	0.543294	6.14927	7.40557
94	SPP1	ITGAV	R-HSA-210990	PECAM1 interactions	1.92952e-07	5.36698e-07	0.666498	0.705837	8.33034e-07	1	4	8	0.434525	1	0.543294	6.14927	7.40557
95	SPP1	ITGAV	R-HSA-2129379	Molecules associated with elastic fibres	6.00237e-07	1.01367e-06	0.666498	0.705837	8.33034e-07	1	4	9	0.696036	1	0.543294	6.14927	7.40557
96	SPP1	ITGAV	R-HSA-216083	Integrin cell surface interactions	6.45016e-07	1.06953e-06	0.666498	0.705837	8.33034e-07	1	9	18	0.61343	1	0.543294	6.14927	7.40557
97	SPP1	ITGAV	R-HSA-3000157	Laminin interactions	5.57898e-07	9.5681e-07	0.666498	0.705837	8.33034e-07	1	4	8	0.633202	1	0.543294	6.14927	7.40557
98	SPP1	ITGAV	R-HSA-3000170	Syndecan interactions	6.13891e-07	1.03146e-06	0.666498	0.705837	8.33034e-07	1	3	6	0.696036	1	0.543294	6.14927	7.40557
99	SPP1	ITGAV	R-HSA-3000171	Non-integrin membrane-ECM interactions	7.5047e-07	1.21173e-06	0.666498	0.705837	8.33034e-07	1	7	14	0.696036	1	0.543294	6.14927	7.40557
910	SPP1	ITGAV	R-HSA-3000178	ECM proteoglycans	7.79466e-07	1.25244e-06	0.666498	0.705837	8.33034e-07	1	9	18	0.696036	1	0.543294	6.14927	7.40557
911	SPP1	ITGAV	R-HSA-373760	L1CAM interactions	1.55031e-08	9.85098e-08	0.666498	0.705837	8.33034e-07	1	15	29	0.315086	1	0.543294	6.14927	7.40557
912	SPP1	ITGAV	R-HSA-4420097	VEGFA-VEGFR2 Pathway	3.31198e-08	1.68656e-07	0.666498	0.705837	8.33034e-07	1	36	67	0.365867	1	0.543294	6.14927	7.40557
913	SPP1	ITGAV	R-HSA-445144	Signal transduction by L1	5.14392e-08	2.27018e-07	0.666498	0.705837	8.33034e-07	1	4	9	0.360667	1	0.543294	6.14927	7.40557
101	SPP1	ITGB1	R-HSA-1500931	Cell-Cell communication	2.29482e-08	1.33261e-07	0.666498	0.710994	4.80052e-07	1	7	14	0.322464	1	0.543207	6.14927	7.40039
102	SPP1	ITGB1	R-HSA-1566948	Elastic fibre formation	2.50603e-07	6.34389e-07	0.666498	0.710994	4.80052e-07	1	6	12	0.548271	1	0.543207	6.14927	7.40039
103	SPP1	ITGB1	R-HSA-1566977	Fibronectin matrix formation	2.86705e-07	6.5542e-07	0.666498	0.710994	4.80052e-07	1	1	2	0.772811	1	0.543207	6.14927	7.40039
104	SPP1	ITGB1	R-HSA-195258	RHO GTPase Effectors	3.19751e-09	3.77991e-08	0.666498	0.710994	4.80052e-07	1	102	186	0.365867	1	0.543207	6.14927	7.40039
105	SPP1	ITGB1	R-HSA-198933	Immunoregulatory interactions between a Lymphoid and a non-Lymphoid cell	7.07577e-08	2.80376e-07	0.666498	0.710994	4.80052e-07	1	1	3	0.528237	1	0.543207	6.14927	7.40039
106	SPP1	ITGB1	R-HSA-202733	Cell surface interactions at the vascular wall	1.52123e-08	9.85098e-08	0.666498	0.710994	4.80052e-07	1	22	40	0.322464	1	0.543207	6.14927	7.40039
107	SPP1	ITGB1	R-HSA-210991	Basigin interactions	1.32139e-10	6.57509e-09	0.666498	0.710994	4.80052e-07	1	6	11	0.0987146	1	0.543207	6.14927	7.40039
108	SPP1	ITGB1	R-HSA-2129379	Molecules associated with elastic fibres	1.18118e-07	3.75934e-07	0.666498	0.710994	4.80052e-07	1	3	6	0.444383	1	0.543207	6.14927	7.40039
109	SPP1	ITGB1	R-HSA-216083	Integrin cell surface interactions	5.49392e-09	4.83328e-08	0.666498	0.710994	4.80052e-07	1	19	35	0.290471	1	0.543207	6.14927	7.40039
1010	SPP1	ITGB1	R-HSA-3000157	Laminin interactions	3.27441e-07	6.90337e-07	0.666498	0.710994	4.80052e-07	1	11	20	0.527682	1	0.543207	6.14927	7.40039
1011	SPP1	ITGB1	R-HSA-3000170	Syndecan interactions	3.83389e-07	7.59304e-07	0.666498	0.710994	4.80052e-07	1	4	8	0.696036	1	0.543207	6.14927	7.40039
1012	SPP1	ITGB1	R-HSA-3000171	Non-integrin membrane-ECM interactions	4.67227e-07	8.49737e-07	0.666498	0.710994	4.80052e-07	1	12	23	0.691516	1	0.543207	6.14927	7.40039
1013	SPP1	ITGB1	R-HSA-3000178	ECM proteoglycans	4.75039e-07	8.59223e-07	0.666498	0.710994	4.80052e-07	1	15	29	0.703356	1	0.543207	6.14927	7.40039
1014	SPP1	ITGB1	R-HSA-373755	Semaphorin interactions	1.03336e-08	7.50457e-08	0.666498	0.710994	4.80052e-07	1	22	41	0.32431	1	0.543207	6.14927	7.40039
1015	SPP1	ITGB1	R-HSA-373760	L1CAM interactions	1.48319e-08	9.81874e-08	0.666498	0.710994	4.80052e-07	1	18	33	0.315086	1	0.543207	6.14927	7.40039
1016	SPP1	ITGB1	R-HSA-416700	Other semaphorin interactions	3.64421e-08	1.78052e-07	0.666498	0.710994	4.80052e-07	1	1	2	0.275523	1	0.543207	6.14927	7.40039
1017	SPP1	ITGB1	R-HSA-445144	Signal transduction by L1	7.41535e-08	2.85405e-07	0.666498	0.710994	4.80052e-07	1	5	10	0.392811	1	0.543207	6.14927	7.40039
1018	SPP1	ITGB1	R-HSA-446728	Cell junction organization	1.06864e-07	3.68457e-07	0.666498	0.710994	4.80052e-07	1	2	4	0.435604	1	0.543207	6.14927	7.40039
1019	SPP1	ITGB1	R-HSA-447041	CHL1 interactions	3.68083e-08	1.78052e-07	0.666498	0.710994	4.80052e-07	1	2	4	0.290471	1	0.543207	6.14927	7.40039
1020	SPP1	ITGB1	R-HSA-5663220	RHO GTPases Activate Formins	4.36635e-07	8.07409e-07	0.666498	0.710994	4.80052e-07	1	1	2	0.953708	1	0.543207	6.14927	7.40039
1021	SPP1	ITGB1	R-HSA-6785807	Interleukin-4 and Interleukin-13 signaling	8.52478e-08	3.10077e-07	0.666498	0.710994	4.80052e-07	1	56	102	0.410879	1	0.543207	6.14927	7.40039
1022	SPP1	ITGB1	R-HSA-6806834	Signaling by MET	4.12362e-07	7.89374e-07	0.666498	0.710994	4.80052e-07	1	23	42	0.546953	1	0.543207	6.14927	7.40039
1023	SPP1	ITGB1	R-HSA-75892	Platelet Adhesion to exposed collagen	1.67038e-07	4.93656e-07	0.666498	0.710994	4.80052e-07	1	1	3	0.703356	1	0.543207	6.14927	7.40039
1024	SPP1	ITGB1	R-HSA-8874081	MET activates PTK2 signaling	3.85424e-07	7.59304e-07	0.666498	0.710994	4.80052e-07	1	8	16	0.633202	1	0.543207	6.14927	7.40039
1025	SPP1	ITGB1	R-HSA-8875513	MET interacts with TNS proteins	1.52539e-07	4.59005e-07	0.666498	0.710994	4.80052e-07	1	1	3	0.682388	1	0.543207	6.14927	7.40039
1026	SPP1	ITGB1	R-HSA-8875878	MET promotes cell motility	3.46518e-07	7.12406e-07	0.666498	0.710994	4.80052e-07	1	12	23	0.560448	1	0.543207	6.14927	7.40039
111	THBS2	CD47	R-HSA-1500931	Cell-Cell communication	5.39043e-08	2.34767e-07	0.946078	0.444091	6.08534e-07	1	7	13	0.322464	1	0.53377	6.6576	6.33542
112	THBS2	CD47	R-HSA-202733	Cell surface interactions at the vascular wall	2.79321e-07	6.52715e-07	0.946078	0.444091	6.08534e-07	1	18	34	0.476684	1	0.53377	6.6576	6.33542
113	THBS2	CD47	R-HSA-216083	Integrin cell surface interactions	3.75646e-07	7.58163e-07	0.946078	0.444091	6.08534e-07	1	2	4	0.680569	1	0.53377	6.6576	6.33542
114	THBS2	CD47	R-HSA-391160	Signal regulatory protein family interactions	3.05128e-07	6.71827e-07	0.946078	0.444091	6.08534e-07	1	4	8	0.560448	1	0.53377	6.6576	6.33542
121	THBS2	ITGB1	R-HSA-1500931	Cell-Cell communication	3.08794e-10	1.02211e-08	0.946078	0.710994	6.45963e-09	1	7	14	0.322464	1	0.553043	6.6576	7.40039
122	THBS2	ITGB1	R-HSA-1566948	Elastic fibre formation	3.37214e-09	3.84889e-08	0.946078	0.710994	6.45963e-09	1	6	12	0.548271	1	0.553043	6.6576	7.40039
123	THBS2	ITGB1	R-HSA-1566977	Fibronectin matrix formation	3.85793e-09	4.11927e-08	0.946078	0.710994	6.45963e-09	1	1	2	0.772811	1	0.553043	6.6576	7.40039
124	THBS2	ITGB1	R-HSA-195258	RHO GTPase Effectors	4.3026e-11	6.57509e-09	0.946078	0.710994	6.45963e-09	1	102	186	0.365867	1	0.553043	6.6576	7.40039
125	THBS2	ITGB1	R-HSA-198933	Immunoregulatory interactions between a Lymphoid and a non-Lymphoid cell	9.52122e-10	2.07228e-08	0.946078	0.710994	6.45963e-09	1	1	3	0.528237	1	0.553043	6.6576	7.40039
126	THBS2	ITGB1	R-HSA-202733	Cell surface interactions at the vascular wall	2.04699e-10	7.52837e-09	0.946078	0.710994	6.45963e-09	1	22	40	0.322464	1	0.553043	6.6576	7.40039
127	THBS2	ITGB1	R-HSA-210991	Basigin interactions	1.77807e-12	5.88542e-10	0.946078	0.710994	6.45963e-09	1	6	11	0.0987146	1	0.553043	6.6576	7.40039
128	THBS2	ITGB1	R-HSA-2129379	Molecules associated with elastic fibres	1.58941e-09	2.63047e-08	0.946078	0.710994	6.45963e-09	1	3	6	0.444383	1	0.553043	6.6576	7.40039
129	THBS2	ITGB1	R-HSA-216083	Integrin cell surface interactions	7.39268e-11	6.57509e-09	0.946078	0.710994	6.45963e-09	1	19	35	0.290471	1	0.553043	6.6576	7.40039
1210	THBS2	ITGB1	R-HSA-3000157	Laminin interactions	4.40608e-09	4.53935e-08	0.946078	0.710994	6.45963e-09	1	11	20	0.527682	1	0.553043	6.6576	7.40039
1211	THBS2	ITGB1	R-HSA-3000170	Syndecan interactions	5.15892e-09	4.76852e-08	0.946078	0.710994	6.45963e-09	1	4	8	0.696036	1	0.553043	6.6576	7.40039
1212	THBS2	ITGB1	R-HSA-3000171	Non-integrin membrane-ECM interactions	6.28706e-09	5.16051e-08	0.946078	0.710994	6.45963e-09	1	12	23	0.691516	1	0.553043	6.6576	7.40039
1213	THBS2	ITGB1	R-HSA-3000178	ECM proteoglycans	6.39217e-09	5.16051e-08	0.946078	0.710994	6.45963e-09	1	15	29	0.703356	1	0.553043	6.6576	7.40039
1214	THBS2	ITGB1	R-HSA-373755	Semaphorin interactions	1.3905e-10	6.57509e-09	0.946078	0.710994	6.45963e-09	1	22	41	0.32431	1	0.553043	6.6576	7.40039
1215	THBS2	ITGB1	R-HSA-373760	L1CAM interactions	1.9958e-10	7.52837e-09	0.946078	0.710994	6.45963e-09	1	18	33	0.315086	1	0.553043	6.6576	7.40039
1216	THBS2	ITGB1	R-HSA-416700	Other semaphorin interactions	4.90369e-10	1.36619e-08	0.946078	0.710994	6.45963e-09	1	1	2	0.275523	1	0.553043	6.6576	7.40039
1217	THBS2	ITGB1	R-HSA-445144	Signal transduction by L1	9.97818e-10	2.07228e-08	0.946078	0.710994	6.45963e-09	1	5	10	0.392811	1	0.553043	6.6576	7.40039
1218	THBS2	ITGB1	R-HSA-446728	Cell junction organization	1.43797e-09	2.63047e-08	0.946078	0.710994	6.45963e-09	1	2	4	0.435604	1	0.553043	6.6576	7.40039
1219	THBS2	ITGB1	R-HSA-447041	CHL1 interactions	4.95296e-10	1.36619e-08	0.946078	0.710994	6.45963e-09	1	2	4	0.290471	1	0.553043	6.6576	7.40039
1220	THBS2	ITGB1	R-HSA-5663220	RHO GTPases Activate Formins	5.87541e-09	4.98656e-08	0.946078	0.710994	6.45963e-09	1	1	2	0.953708	1	0.553043	6.6576	7.40039
1221	THBS2	ITGB1	R-HSA-6785807	Interleukin-4 and Interleukin-13 signaling	1.1471e-09	2.23348e-08	0.946078	0.710994	6.45963e-09	1	56	102	0.410879	1	0.553043	6.6576	7.40039
1222	THBS2	ITGB1	R-HSA-6806834	Signaling by MET	5.54879e-09	4.83328e-08	0.946078	0.710994	6.45963e-09	1	23	42	0.546953	1	0.553043	6.6576	7.40039
1223	THBS2	ITGB1	R-HSA-75892	Platelet Adhesion to exposed collagen	2.24768e-09	3.09992e-08	0.946078	0.710994	6.45963e-09	1	1	3	0.703356	1	0.553043	6.6576	7.40039
1224	THBS2	ITGB1	R-HSA-8874081	MET activates PTK2 signaling	5.18631e-09	4.76852e-08	0.946078	0.710994	6.45963e-09	1	8	16	0.633202	1	0.553043	6.6576	7.40039
1225	THBS2	ITGB1	R-HSA-8875513	MET interacts with TNS proteins	2.05259e-09	3.08821e-08	0.946078	0.710994	6.45963e-09	1	1	3	0.682388	1	0.553043	6.6576	7.40039
1226	THBS2	ITGB1	R-HSA-8875878	MET promotes cell motility	4.66278e-09	4.53935e-08	0.946078	0.710994	6.45963e-09	1	12	23	0.560448	1	0.553043	6.6576	7.40039
131	TIMP2	ITGB1	R-HSA-1500931	Cell-Cell communication	1.91539e-08	1.15272e-07	0.576926	0.710994	4.00679e-07	1	7	14	0.322464	1	0.565792	7.38328	7.40039
132	TIMP2	ITGB1	R-HSA-1566948	Elastic fibre formation	2.09168e-07	5.58343e-07	0.576926	0.710994	4.00679e-07	1	6	12	0.548271	1	0.565792	7.38328	7.40039
133	TIMP2	ITGB1	R-HSA-1566977	Fibronectin matrix formation	2.393e-07	6.14019e-07	0.576926	0.710994	4.00679e-07	1	1	2	0.772811	1	0.565792	7.38328	7.40039
134	TIMP2	ITGB1	R-HSA-195258	RHO GTPase Effectors	2.66883e-09	3.27178e-08	0.576926	0.710994	4.00679e-07	1	102	186	0.365867	1	0.565792	7.38328	7.40039
135	TIMP2	ITGB1	R-HSA-198933	Immunoregulatory interactions between a Lymphoid and a non-Lymphoid cell	5.90585e-08	2.5062e-07	0.576926	0.710994	4.00679e-07	1	1	3	0.528237	1	0.565792	7.38328	7.40039
136	TIMP2	ITGB1	R-HSA-202733	Cell surface interactions at the vascular wall	1.26971e-08	8.57703e-08	0.576926	0.710994	4.00679e-07	1	22	40	0.322464	1	0.565792	7.38328	7.40039
137	TIMP2	ITGB1	R-HSA-210991	Basigin interactions	1.10291e-10	6.57509e-09	0.576926	0.710994	4.00679e-07	1	6	11	0.0987146	1	0.565792	7.38328	7.40039
138	TIMP2	ITGB1	R-HSA-2129379	Molecules associated with elastic fibres	9.85883e-08	3.5089e-07	0.576926	0.710994	4.00679e-07	1	3	6	0.444383	1	0.565792	7.38328	7.40039
139	TIMP2	ITGB1	R-HSA-216083	Integrin cell surface interactions	4.58555e-09	4.53935e-08	0.576926	0.710994	4.00679e-07	1	19	35	0.290471	1	0.565792	7.38328	7.40039
1310	TIMP2	ITGB1	R-HSA-3000157	Laminin interactions	2.73301e-07	6.52715e-07	0.576926	0.710994	4.00679e-07	1	11	20	0.527682	1	0.565792	7.38328	7.40039
1311	TIMP2	ITGB1	R-HSA-3000170	Syndecan interactions	3.19999e-07	6.8698e-07	0.576926	0.710994	4.00679e-07	1	4	8	0.696036	1	0.565792	7.38328	7.40039
1312	TIMP2	ITGB1	R-HSA-3000171	Non-integrin membrane-ECM interactions	3.89975e-07	7.59304e-07	0.576926	0.710994	4.00679e-07	1	12	23	0.691516	1	0.565792	7.38328	7.40039
1313	TIMP2	ITGB1	R-HSA-3000178	ECM proteoglycans	3.96495e-07	7.67485e-07	0.576926	0.710994	4.00679e-07	1	15	29	0.703356	1	0.565792	7.38328	7.40039
1314	TIMP2	ITGB1	R-HSA-373755	Semaphorin interactions	8.62504e-09	6.63928e-08	0.576926	0.710994	4.00679e-07	1	22	41	0.32431	1	0.565792	7.38328	7.40039
1315	TIMP2	ITGB1	R-HSA-373760	L1CAM interactions	1.23796e-08	8.53677e-08	0.576926	0.710994	4.00679e-07	1	18	33	0.315086	1	0.565792	7.38328	7.40039
1316	TIMP2	ITGB1	R-HSA-416700	Other semaphorin interactions	3.04167e-08	1.58892e-07	0.576926	0.710994	4.00679e-07	1	1	2	0.275523	1	0.565792	7.38328	7.40039
1317	TIMP2	ITGB1	R-HSA-445144	Signal transduction by L1	6.18929e-08	2.56082e-07	0.576926	0.710994	4.00679e-07	1	5	10	0.392811	1	0.565792	7.38328	7.40039
1318	TIMP2	ITGB1	R-HSA-446728	Cell junction organization	8.91946e-08	3.20907e-07	0.576926	0.710994	4.00679e-07	1	2	4	0.435604	1	0.565792	7.38328	7.40039
1319	TIMP2	ITGB1	R-HSA-447041	CHL1 interactions	3.07224e-08	1.58892e-07	0.576926	0.710994	4.00679e-07	1	2	4	0.290471	1	0.565792	7.38328	7.40039
1320	TIMP2	ITGB1	R-HSA-5663220	RHO GTPases Activate Formins	3.64441e-07	7.4294e-07	0.576926	0.710994	4.00679e-07	1	1	2	0.953708	1	0.565792	7.38328	7.40039
1321	TIMP2	ITGB1	R-HSA-6785807	Interleukin-4 and Interleukin-13 signaling	7.11528e-08	2.80376e-07	0.576926	0.710994	4.00679e-07	1	56	102	0.410879	1	0.565792	7.38328	7.40039
1322	TIMP2	ITGB1	R-HSA-6806834	Signaling by MET	3.44181e-07	7.12025e-07	0.576926	0.710994	4.00679e-07	1	23	42	0.546953	1	0.565792	7.38328	7.40039
1323	TIMP2	ITGB1	R-HSA-75892	Platelet Adhesion to exposed collagen	1.39419e-07	4.27295e-07	0.576926	0.710994	4.00679e-07	1	1	3	0.703356	1	0.565792	7.38328	7.40039
1324	TIMP2	ITGB1	R-HSA-8874081	MET activates PTK2 signaling	3.21698e-07	6.8698e-07	0.576926	0.710994	4.00679e-07	1	8	16	0.633202	1	0.565792	7.38328	7.40039
1325	TIMP2	ITGB1	R-HSA-8875513	MET interacts with TNS proteins	1.27318e-07	3.97569e-07	0.576926	0.710994	4.00679e-07	1	1	3	0.682388	1	0.565792	7.38328	7.40039
1326	TIMP2	ITGB1	R-HSA-8875878	MET promotes cell motility	2.89224e-07	6.55707e-07	0.576926	0.710994	4.00679e-07	1	12	23	0.560448	1	0.565792	7.38328	7.40039
14	TNC	ITGAV	R-HSA-1566948	Elastic fibre formation	4.03503e-06	4.91027e-06	0.548792	0.705837	6.31501e-06	1	7	13	0.548271	1	0.538283	5.90603	7.40557
141	TNC	ITGAV	R-HSA-194138	Signaling by VEGF	2.07496e-07	5.58343e-07	0.548792	0.705837	6.31501e-06	1	37	68	0.355081	1	0.538283	5.90603	7.40557
142	TNC	ITGAV	R-HSA-202733	Cell surface interactions at the vascular wall	3.22204e-06	4.08619e-06	0.548792	0.705837	6.31501e-06	1	18	34	0.487619	1	0.538283	5.90603	7.40557
143	TNC	ITGAV	R-HSA-210990	PECAM1 interactions	1.46272e-06	2.1423e-06	0.548792	0.705837	6.31501e-06	1	4	8	0.434525	1	0.538283	5.90603	7.40557
144	TNC	ITGAV	R-HSA-2129379	Molecules associated with elastic fibres	4.55024e-06	5.41773e-06	0.548792	0.705837	6.31501e-06	1	4	9	0.696036	1	0.538283	5.90603	7.40557
145	TNC	ITGAV	R-HSA-216083	Integrin cell surface interactions	4.88969e-06	5.71904e-06	0.548792	0.705837	6.31501e-06	1	9	18	0.61343	1	0.538283	5.90603	7.40557
146	TNC	ITGAV	R-HSA-3000157	Laminin interactions	4.22928e-06	5.10909e-06	0.548792	0.705837	6.31501e-06	1	4	8	0.633202	1	0.538283	5.90603	7.40557
147	TNC	ITGAV	R-HSA-3000170	Syndecan interactions	4.65375e-06	5.52111e-06	0.548792	0.705837	6.31501e-06	1	3	6	0.696036	1	0.538283	5.90603	7.40557
148	TNC	ITGAV	R-HSA-3000171	Non-integrin membrane-ECM interactions	5.68911e-06	6.40394e-06	0.548792	0.705837	6.31501e-06	1	7	14	0.696036	1	0.538283	5.90603	7.40557
149	TNC	ITGAV	R-HSA-3000178	ECM proteoglycans	5.90892e-06	6.58537e-06	0.548792	0.705837	6.31501e-06	1	9	18	0.696036	1	0.538283	5.90603	7.40557
1410	TNC	ITGAV	R-HSA-373760	L1CAM interactions	1.17524e-07	3.75934e-07	0.548792	0.705837	6.31501e-06	1	15	29	0.315086	1	0.538283	5.90603	7.40557
1411	TNC	ITGAV	R-HSA-4420097	VEGFA-VEGFR2 Pathway	2.51072e-07	6.34389e-07	0.548792	0.705837	6.31501e-06	1	36	67	0.365867	1	0.538283	5.90603	7.40557
1412	TNC	ITGAV	R-HSA-445144	Signal transduction by L1	3.89947e-07	7.59304e-07	0.548792	0.705837	6.31501e-06	1	4	9	0.360667	1	0.538283	5.90603	7.40557
15	TNC	ITGB1	R-HSA-1500931	Cell-Cell communication	1.73964e-07	4.96398e-07	0.548792	0.710994	3.63914e-06	1	7	14	0.322464	1	0.538196	5.90603	7.40039
151	TNC	ITGB1	R-HSA-1566948	Elastic fibre formation	1.89975e-06	2.68726e-06	0.548792	0.710994	3.63914e-06	1	6	12	0.548271	1	0.538196	5.90603	7.40039
152	TNC	ITGB1	R-HSA-1566977	Fibronectin matrix formation	2.17343e-06	2.99752e-06	0.548792	0.710994	3.63914e-06	1	1	2	0.772811	1	0.538196	5.90603	7.40039
153	TNC	ITGB1	R-HSA-195258	RHO GTPase Effectors	2.42394e-08	1.35987e-07	0.548792	0.710994	3.63914e-06	1	102	186	0.365867	1	0.538196	5.90603	7.40039
154	TNC	ITGB1	R-HSA-198933	Immunoregulatory interactions between a Lymphoid and a non-Lymphoid cell	5.36395e-07	9.30431e-07	0.548792	0.710994	3.63914e-06	1	1	3	0.528237	1	0.538196	5.90603	7.40039
155	TNC	ITGB1	R-HSA-202733	Cell surface interactions at the vascular wall	1.15321e-07	3.74227e-07	0.548792	0.710994	3.63914e-06	1	22	40	0.322464	1	0.538196	5.90603	7.40039
156	TNC	ITGB1	R-HSA-210991	Basigin interactions	1.00171e-09	2.07228e-08	0.548792	0.710994	3.63914e-06	1	6	11	0.0987146	1	0.538196	5.90603	7.40039
157	TNC	ITGB1	R-HSA-2129379	Molecules associated with elastic fibres	8.95422e-07	1.39804e-06	0.548792	0.710994	3.63914e-06	1	3	6	0.444383	1	0.538196	5.90603	7.40039
158	TNC	ITGB1	R-HSA-216083	Integrin cell surface interactions	4.1648e-08	1.94162e-07	0.548792	0.710994	3.63914e-06	1	19	35	0.290471	1	0.538196	5.90603	7.40039
159	TNC	ITGB1	R-HSA-3000157	Laminin interactions	2.48224e-06	3.3264e-06	0.548792	0.710994	3.63914e-06	1	11	20	0.527682	1	0.538196	5.90603	7.40039
1510	TNC	ITGB1	R-HSA-3000170	Syndecan interactions	2.90637e-06	3.79086e-06	0.548792	0.710994	3.63914e-06	1	4	8	0.696036	1	0.538196	5.90603	7.40039
1511	TNC	ITGB1	R-HSA-3000171	Non-integrin membrane-ECM interactions	3.54192e-06	4.39092e-06	0.548792	0.710994	3.63914e-06	1	12	23	0.691516	1	0.538196	5.90603	7.40039
1512	TNC	ITGB1	R-HSA-3000178	ECM proteoglycans	3.60114e-06	4.44768e-06	0.548792	0.710994	3.63914e-06	1	15	29	0.703356	1	0.538196	5.90603	7.40039
1513	TNC	ITGB1	R-HSA-373755	Semaphorin interactions	7.83364e-08	2.94652e-07	0.548792	0.710994	3.63914e-06	1	22	41	0.32431	1	0.538196	5.90603	7.40039
1514	TNC	ITGB1	R-HSA-373760	L1CAM interactions	1.12437e-07	3.72166e-07	0.548792	0.710994	3.63914e-06	1	18	33	0.315086	1	0.538196	5.90603	7.40039
1515	TNC	ITGB1	R-HSA-416700	Other semaphorin interactions	2.76258e-07	6.52715e-07	0.548792	0.710994	3.63914e-06	1	1	2	0.275523	1	0.538196	5.90603	7.40039
1516	TNC	ITGB1	R-HSA-445144	Signal transduction by L1	5.62138e-07	9.59112e-07	0.548792	0.710994	3.63914e-06	1	5	10	0.392811	1	0.538196	5.90603	7.40039
1517	TNC	ITGB1	R-HSA-446728	Cell junction organization	8.10104e-07	1.28916e-06	0.548792	0.710994	3.63914e-06	1	2	4	0.435604	1	0.538196	5.90603	7.40039
1518	TNC	ITGB1	R-HSA-447041	CHL1 interactions	2.79034e-07	6.52715e-07	0.548792	0.710994	3.63914e-06	1	2	4	0.290471	1	0.538196	5.90603	7.40039
1519	TNC	ITGB1	R-HSA-5663220	RHO GTPases Activate Formins	3.31001e-06	4.18173e-06	0.548792	0.710994	3.63914e-06	1	1	2	0.953708	1	0.538196	5.90603	7.40039
1520	TNC	ITGB1	R-HSA-6785807	Interleukin-4 and Interleukin-13 signaling	6.46241e-07	1.06953e-06	0.548792	0.710994	3.63914e-06	1	56	102	0.410879	1	0.538196	5.90603	7.40039
1521	TNC	ITGB1	R-HSA-6806834	Signaling by MET	3.12601e-06	4.0105e-06	0.548792	0.710994	3.63914e-06	1	23	42	0.546953	1	0.538196	5.90603	7.40039
1522	TNC	ITGB1	R-HSA-75892	Platelet Adhesion to exposed collagen	1.26627e-06	1.89654e-06	0.548792	0.710994	3.63914e-06	1	1	3	0.703356	1	0.538196	5.90603	7.40039
1523	TNC	ITGB1	R-HSA-8874081	MET activates PTK2 signaling	2.9218e-06	3.79261e-06	0.548792	0.710994	3.63914e-06	1	8	16	0.633202	1	0.538196	5.90603	7.40039
1524	TNC	ITGB1	R-HSA-8875513	MET interacts with TNS proteins	1.15636e-06	1.76385e-06	0.548792	0.710994	3.63914e-06	1	1	3	0.682388	1	0.538196	5.90603	7.40039
1525	TNC	ITGB1	R-HSA-8875878	MET promotes cell motility	2.62686e-06	3.49193e-06	0.548792	0.710994	3.63914e-06	1	12	23	0.560448	1	0.538196	5.90603	7.40039
16	VCAN	ITGB1	R-HSA-1500931	Cell-Cell communication	1.69211e-07	4.95654e-07	0.502606	0.710994	3.53971e-06	1	7	14	0.322464	1	0.535985	5.8019	7.40039
161	VCAN	ITGB1	R-HSA-1566948	Elastic fibre formation	1.84785e-06	2.62505e-06	0.502606	0.710994	3.53971e-06	1	6	12	0.548271	1	0.535985	5.8019	7.40039
162	VCAN	ITGB1	R-HSA-1566977	Fibronectin matrix formation	2.11405e-06	2.94012e-06	0.502606	0.710994	3.53971e-06	1	1	2	0.772811	1	0.535985	5.8019	7.40039
163	VCAN	ITGB1	R-HSA-195258	RHO GTPase Effectors	2.35772e-08	1.34552e-07	0.502606	0.710994	3.53971e-06	1	102	186	0.365867	1	0.535985	5.8019	7.40039
164	VCAN	ITGB1	R-HSA-198933	Immunoregulatory interactions between a Lymphoid and a non-Lymphoid cell	5.21739e-07	9.30431e-07	0.502606	0.710994	3.53971e-06	1	1	3	0.528237	1	0.535985	5.8019	7.40039
165	VCAN	ITGB1	R-HSA-202733	Cell surface interactions at the vascular wall	1.1217e-07	3.72166e-07	0.502606	0.710994	3.53971e-06	1	22	40	0.322464	1	0.535985	5.8019	7.40039
166	VCAN	ITGB1	R-HSA-210991	Basigin interactions	9.74338e-10	2.07228e-08	0.502606	0.710994	3.53971e-06	1	6	11	0.0987146	1	0.535985	5.8019	7.40039
167	VCAN	ITGB1	R-HSA-2129379	Molecules associated with elastic fibres	8.70956e-07	1.36629e-06	0.502606	0.710994	3.53971e-06	1	3	6	0.444383	1	0.535985	5.8019	7.40039
168	VCAN	ITGB1	R-HSA-216083	Integrin cell surface interactions	4.051e-08	1.91554e-07	0.502606	0.710994	3.53971e-06	1	19	35	0.290471	1	0.535985	5.8019	7.40039
169	VCAN	ITGB1	R-HSA-3000157	Laminin interactions	2.41442e-06	3.26193e-06	0.502606	0.710994	3.53971e-06	1	11	20	0.527682	1	0.535985	5.8019	7.40039
1610	VCAN	ITGB1	R-HSA-3000170	Syndecan interactions	2.82696e-06	3.74289e-06	0.502606	0.710994	3.53971e-06	1	4	8	0.696036	1	0.535985	5.8019	7.40039
1611	VCAN	ITGB1	R-HSA-3000171	Non-integrin membrane-ECM interactions	3.44515e-06	4.30318e-06	0.502606	0.710994	3.53971e-06	1	12	23	0.691516	1	0.535985	5.8019	7.40039
1612	VCAN	ITGB1	R-HSA-3000178	ECM proteoglycans	3.50275e-06	4.35868e-06	0.502606	0.710994	3.53971e-06	1	15	29	0.703356	1	0.535985	5.8019	7.40039
1613	VCAN	ITGB1	R-HSA-373755	Semaphorin interactions	7.6196e-08	2.89895e-07	0.502606	0.710994	3.53971e-06	1	22	41	0.32431	1	0.535985	5.8019	7.40039
1614	VCAN	ITGB1	R-HSA-373760	L1CAM interactions	1.09365e-07	3.72166e-07	0.502606	0.710994	3.53971e-06	1	18	33	0.315086	1	0.535985	5.8019	7.40039
1615	VCAN	ITGB1	R-HSA-416700	Other semaphorin interactions	2.6871e-07	6.52715e-07	0.502606	0.710994	3.53971e-06	1	1	2	0.275523	1	0.535985	5.8019	7.40039
1616	VCAN	ITGB1	R-HSA-445144	Signal transduction by L1	5.46779e-07	9.42624e-07	0.502606	0.710994	3.53971e-06	1	5	10	0.392811	1	0.535985	5.8019	7.40039
1617	VCAN	ITGB1	R-HSA-446728	Cell junction organization	7.8797e-07	1.25999e-06	0.502606	0.710994	3.53971e-06	1	2	4	0.435604	1	0.535985	5.8019	7.40039
1618	VCAN	ITGB1	R-HSA-447041	CHL1 interactions	2.7141e-07	6.52715e-07	0.502606	0.710994	3.53971e-06	1	2	4	0.290471	1	0.535985	5.8019	7.40039
1619	VCAN	ITGB1	R-HSA-5663220	RHO GTPases Activate Formins	3.21957e-06	4.08619e-06	0.502606	0.710994	3.53971e-06	1	1	2	0.953708	1	0.535985	5.8019	7.40039
1620	VCAN	ITGB1	R-HSA-6785807	Interleukin-4 and Interleukin-13 signaling	6.28583e-07	1.05081e-06	0.502606	0.710994	3.53971e-06	1	56	102	0.410879	1	0.535985	5.8019	7.40039
1621	VCAN	ITGB1	R-HSA-6806834	Signaling by MET	3.04059e-06	3.93139e-06	0.502606	0.710994	3.53971e-06	1	23	42	0.546953	1	0.535985	5.8019	7.40039
1622	VCAN	ITGB1	R-HSA-75892	Platelet Adhesion to exposed collagen	1.23167e-06	1.8701e-06	0.502606	0.710994	3.53971e-06	1	1	3	0.703356	1	0.535985	5.8019	7.40039
1623	VCAN	ITGB1	R-HSA-8874081	MET activates PTK2 signaling	2.84197e-06	3.74777e-06	0.502606	0.710994	3.53971e-06	1	8	16	0.633202	1	0.535985	5.8019	7.40039
1624	VCAN	ITGB1	R-HSA-8875513	MET interacts with TNS proteins	1.12476e-06	1.7236e-06	0.502606	0.710994	3.53971e-06	1	1	3	0.682388	1	0.535985	5.8019	7.40039
1625	VCAN	ITGB1	R-HSA-8875878	MET promotes cell motility	2.55509e-06	3.41021e-06	0.502606	0.710994	3.53971e-06	1	12	23	0.560448	1	0.535985	5.8019	7.40039
17	VEGFD	ITGB1	R-HSA-1500931	Cell-Cell communication	4.62338e-07	8.45491e-07	0.398595	0.710994	9.6716e-06	1	7	14	0.322464	1	0.540048	5.99475	7.40039
171	VEGFD	ITGB1	R-HSA-1566948	Elastic fibre formation	5.0489e-06	5.8455e-06	0.398595	0.710994	9.6716e-06	1	6	12	0.548271	1	0.540048	5.99475	7.40039
172	VEGFD	ITGB1	R-HSA-1566977	Fibronectin matrix formation	5.77624e-06	6.45924e-06	0.398595	0.710994	9.6716e-06	1	1	2	0.772811	1	0.540048	5.99475	7.40039
173	VEGFD	ITGB1	R-HSA-195258	RHO GTPase Effectors	6.44202e-08	2.60038e-07	0.398595	0.710994	9.6716e-06	1	102	186	0.365867	1	0.540048	5.99475	7.40039
174	VEGFD	ITGB1	R-HSA-198933	Immunoregulatory interactions between a Lymphoid and a non-Lymphoid cell	1.42555e-06	2.09715e-06	0.398595	0.710994	9.6716e-06	1	1	3	0.528237	1	0.540048	5.99475	7.40039
175	VEGFD	ITGB1	R-HSA-202733	Cell surface interactions at the vascular wall	3.06483e-07	6.71827e-07	0.398595	0.710994	9.6716e-06	1	22	40	0.322464	1	0.540048	5.99475	7.40039
176	VEGFD	ITGB1	R-HSA-210991	Basigin interactions	2.6622e-09	3.27178e-08	0.398595	0.710994	9.6716e-06	1	6	11	0.0987146	1	0.540048	5.99475	7.40039
177	VEGFD	ITGB1	R-HSA-2129379	Molecules associated with elastic fibres	2.37973e-06	3.22823e-06	0.398595	0.710994	9.6716e-06	1	3	6	0.444383	1	0.540048	5.99475	7.40039
178	VEGFD	ITGB1	R-HSA-216083	Integrin cell surface interactions	1.10686e-07	3.72166e-07	0.398595	0.710994	9.6716e-06	1	19	35	0.290471	1	0.540048	5.99475	7.40039
179	VEGFD	ITGB1	R-HSA-3000157	Laminin interactions	6.59695e-06	7.11453e-06	0.398595	0.710994	9.6716e-06	1	11	20	0.527682	1	0.540048	5.99475	7.40039
1710	VEGFD	ITGB1	R-HSA-3000170	Syndecan interactions	7.72413e-06	8.06526e-06	0.398595	0.710994	9.6716e-06	1	4	8	0.696036	1	0.540048	5.99475	7.40039
1711	VEGFD	ITGB1	R-HSA-3000171	Non-integrin membrane-ECM interactions	9.41322e-06	9.49932e-06	0.398595	0.710994	9.6716e-06	1	12	23	0.691516	1	0.540048	5.99475	7.40039
1712	VEGFD	ITGB1	R-HSA-3000178	ECM proteoglycans	9.5706e-06	9.62878e-06	0.398595	0.710994	9.6716e-06	1	15	29	0.703356	1	0.540048	5.99475	7.40039
1713	VEGFD	ITGB1	R-HSA-373755	Semaphorin interactions	2.08191e-07	5.58343e-07	0.398595	0.710994	9.6716e-06	1	22	41	0.32431	1	0.540048	5.99475	7.40039
1714	VEGFD	ITGB1	R-HSA-373760	L1CAM interactions	2.98819e-07	6.66712e-07	0.398595	0.710994	9.6716e-06	1	18	33	0.315086	1	0.540048	5.99475	7.40039
1715	VEGFD	ITGB1	R-HSA-416700	Other semaphorin interactions	7.342e-07	1.19714e-06	0.398595	0.710994	9.6716e-06	1	1	2	0.275523	1	0.540048	5.99475	7.40039
1716	VEGFD	ITGB1	R-HSA-445144	Signal transduction by L1	1.49397e-06	2.17843e-06	0.398595	0.710994	9.6716e-06	1	5	10	0.392811	1	0.540048	5.99475	7.40039
1717	VEGFD	ITGB1	R-HSA-446728	Cell junction organization	2.15298e-06	2.98174e-06	0.398595	0.710994	9.6716e-06	1	2	4	0.435604	1	0.540048	5.99475	7.40039
1718	VEGFD	ITGB1	R-HSA-447041	CHL1 interactions	7.41577e-07	1.20324e-06	0.398595	0.710994	9.6716e-06	1	2	4	0.290471	1	0.540048	5.99475	7.40039
1719	VEGFD	ITGB1	R-HSA-5663220	RHO GTPases Activate Formins	8.79688e-06	8.98123e-06	0.398595	0.710994	9.6716e-06	1	1	2	0.953708	1	0.540048	5.99475	7.40039
1720	VEGFD	ITGB1	R-HSA-6785807	Interleukin-4 and Interleukin-13 signaling	1.71749e-06	2.46875e-06	0.398595	0.710994	9.6716e-06	1	56	102	0.410879	1	0.540048	5.99475	7.40039
1721	VEGFD	ITGB1	R-HSA-6806834	Signaling by MET	8.30786e-06	8.54006e-06	0.398595	0.710994	9.6716e-06	1	23	42	0.546953	1	0.540048	5.99475	7.40039
1722	VEGFD	ITGB1	R-HSA-75892	Platelet Adhesion to exposed collagen	3.36531e-06	4.21938e-06	0.398595	0.710994	9.6716e-06	1	1	3	0.703356	1	0.540048	5.99475	7.40039
1723	VEGFD	ITGB1	R-HSA-8874081	MET activates PTK2 signaling	7.76514e-06	8.07568e-06	0.398595	0.710994	9.6716e-06	1	8	16	0.633202	1	0.540048	5.99475	7.40039
1724	VEGFD	ITGB1	R-HSA-8875513	MET interacts with TNS proteins	3.07321e-06	3.9581e-06	0.398595	0.710994	9.6716e-06	1	1	3	0.682388	1	0.540048	5.99475	7.40039
1725	VEGFD	ITGB1	R-HSA-8875878	MET promotes cell motility	6.98129e-06	7.43025e-06	0.398595	0.710994	9.6716e-06	1	12	23	0.560448	1	0.540048	5.99475	7.40039

## Sheet: BSR_Inf_RedPath
	L	R	pw.id	pw.name	pval	qval	L.logFC	R.logFC	LR.pval	LR.corr	rank	len	rank.pval	rank.corr	LR.score	L.expr	R.expr
1	{ADAM9;CALR;COL1A1;COL7A1;LAMB3;SPP1;THBS2;TIMP2;TNC;VCAN;VEGFD}	{ITGAV;ITGB1}	R-HSA-1566948	Elastic fibre formation	3.65859e-07	7.4294e-07	0.682951	0.705837	5.72586e-07	1	7	13	0.548271	1	0.592737	9.20448	7.40557
2	{ADAM9;CALR;COL1A1;SPP1;TNC}	{ITGAV}	R-HSA-194138	Signaling by VEGF	1.88138e-08	1.15272e-07	0.682951	0.705837	5.72586e-07	1	37	68	0.355081	1	0.592737	9.20448	7.40557
3	{ADAM9;CALR;COL1A1;COL7A1;LAMB3;SPP1;THBS2;TIMP2;TNC;VCAN;VEGFD}	{ITGAV;ITGB1;CD47}	R-HSA-202733	Cell surface interactions at the vascular wall	2.92145e-07	6.57822e-07	0.682951	0.705837	5.72586e-07	1	18	34	0.487619	1	0.592737	9.20448	7.40557
4	{ADAM9;CALR;COL1A1;SPP1;TNC}	{ITGAV}	R-HSA-210990	PECAM1 interactions	1.32625e-07	4.10271e-07	0.682951	0.705837	5.72586e-07	1	4	8	0.434525	1	0.592737	9.20448	7.40557
5	{ADAM9;CALR;COL1A1;COL7A1;LAMB3;SPP1;THBS2;TIMP2;TNC;VCAN;VEGFD}	{ITGAV;ITGB1}	R-HSA-2129379	Molecules associated with elastic fibres	4.12573e-07	7.89374e-07	0.682951	0.705837	5.72586e-07	1	4	9	0.696036	1	0.592737	9.20448	7.40557
6	{ADAM9;CALR;COL1A1;COL7A1;LAMB3;SPP1;THBS2;TIMP2;TNC;VCAN;VEGFD}	{ITGAV;ITGB1;CD47}	R-HSA-216083	Integrin cell surface interactions	4.43352e-07	8.15275e-07	0.682951	0.705837	5.72586e-07	1	9	18	0.61343	1	0.592737	9.20448	7.40557
7	{ADAM9;CALR;COL1A1;COL7A1;LAMB3;SPP1;THBS2;TIMP2;TNC;VCAN;VEGFD}	{ITGAV;ITGB1}	R-HSA-3000157	Laminin interactions	3.83472e-07	7.59304e-07	0.682951	0.705837	5.72586e-07	1	4	8	0.633202	1	0.592737	9.20448	7.40557
8	{ADAM9;CALR;COL1A1;COL7A1;LAMB3;SPP1;THBS2;TIMP2;TNC;VCAN;VEGFD}	{ITGAV;ITGB1}	R-HSA-3000170	Syndecan interactions	4.21959e-07	7.9902e-07	0.682951	0.705837	5.72586e-07	1	3	6	0.696036	1	0.592737	9.20448	7.40557
9	{ADAM9;CALR;COL1A1;COL7A1;LAMB3;SPP1;THBS2;TIMP2;TNC;VCAN;VEGFD}	{ITGAV;ITGB1}	R-HSA-3000171	Non-integrin membrane-ECM interactions	5.15836e-07	9.27944e-07	0.682951	0.705837	5.72586e-07	1	7	14	0.696036	1	0.592737	9.20448	7.40557
10	{ADAM9;CALR;COL1A1;COL7A1;LAMB3;SPP1;THBS2;TIMP2;TNC;VCAN;VEGFD}	{ITGAV;ITGB1}	R-HSA-3000178	ECM proteoglycans	5.35766e-07	9.30431e-07	0.682951	0.705837	5.72586e-07	1	9	18	0.696036	1	0.592737	9.20448	7.40557
11	{ADAM9;CALR;COL1A1;COL7A1;LAMB3;SPP1;THBS2;TIMP2;TNC;VCAN;VEGFD}	{ITGAV;ITGB1}	R-HSA-373760	L1CAM interactions	1.0656e-08	7.50457e-08	0.682951	0.705837	5.72586e-07	1	15	29	0.315086	1	0.592737	9.20448	7.40557
12	{ADAM9;CALR;COL1A1;SPP1;TNC}	{ITGAV}	R-HSA-4420097	VEGFA-VEGFR2 Pathway	2.27649e-08	1.33261e-07	0.682951	0.705837	5.72586e-07	1	36	67	0.365867	1	0.592737	9.20448	7.40557
13	{ADAM9;CALR;COL1A1;COL7A1;LAMB3;SPP1;THBS2;TIMP2;TNC;VCAN;VEGFD}	{ITGAV;ITGB1}	R-HSA-445144	Signal transduction by L1	3.53568e-08	1.77319e-07	0.682951	0.705837	5.72586e-07	1	4	9	0.360667	1	0.592737	9.20448	7.40557
21	{ADAM9;COL1A1;COL7A1;LAMB3;SPP1;THBS2;TIMP2;TNC;VCAN;VEGFD}	{ITGB1;CD47}	R-HSA-1500931	Cell-Cell communication	1.57735e-08	9.85098e-08	0.682951	0.710994	3.29964e-07	1	7	14	0.322464	1	0.569381	7.60236	7.40039
23	{ADAM9;COL1A1;COL7A1;LAMB3;SPP1;THBS2;TIMP2;TNC;VCAN;VEGFD}	{ITGB1}	R-HSA-1566977	Fibronectin matrix formation	1.97067e-07	5.39083e-07	0.682951	0.710994	3.29964e-07	1	1	2	0.772811	1	0.569381	7.60236	7.40039
24	{ADAM9;COL1A1;COL7A1;LAMB3;SPP1;THBS2;TIMP2;TNC;VCAN;VEGFD}	{ITGB1}	R-HSA-195258	RHO GTPase Effectors	2.19781e-09	3.09992e-08	0.682951	0.710994	3.29964e-07	1	102	186	0.365867	1	0.569381	7.60236	7.40039
25	{ADAM9;COL1A1;COL7A1;LAMB3;SPP1;THBS2;TIMP2;TNC;VCAN;VEGFD}	{ITGB1}	R-HSA-198933	Immunoregulatory interactions between a Lymphoid and a non-Lymphoid cell	4.86353e-08	2.20525e-07	0.682951	0.710994	3.29964e-07	1	1	3	0.528237	1	0.569381	7.60236	7.40039
27	{ADAM9;COL1A1;COL7A1;LAMB3;SPP1;THBS2;TIMP2;TNC;VCAN;VEGFD}	{ITGB1}	R-HSA-210991	Basigin interactions	9.08256e-11	6.57509e-09	0.682951	0.710994	3.29964e-07	1	6	11	0.0987146	1	0.569381	7.60236	7.40039
214	{ADAM9;COL1A1;COL7A1;LAMB3;SPP1;THBS2;TIMP2;TNC;VCAN;VEGFD}	{ITGB1}	R-HSA-373755	Semaphorin interactions	7.10282e-09	5.5977e-08	0.682951	0.710994	3.29964e-07	1	22	41	0.32431	1	0.569381	7.60236	7.40039
216	{ADAM9;COL1A1;COL7A1;LAMB3;SPP1;THBS2;TIMP2;TNC;VCAN;VEGFD}	{ITGB1}	R-HSA-416700	Other semaphorin interactions	2.50485e-08	1.37285e-07	0.682951	0.710994	3.29964e-07	1	1	2	0.275523	1	0.569381	7.60236	7.40039
218	{ADAM9;COL1A1;COL7A1;LAMB3;SPP1;THBS2;TIMP2;TNC;VCAN;VEGFD}	{ITGB1}	R-HSA-446728	Cell junction organization	7.34527e-08	2.85405e-07	0.682951	0.710994	3.29964e-07	1	2	4	0.435604	1	0.569381	7.60236	7.40039
219	{ADAM9;COL1A1;COL7A1;LAMB3;SPP1;THBS2;TIMP2;TNC;VCAN;VEGFD}	{ITGB1}	R-HSA-447041	CHL1 interactions	2.53002e-08	1.37285e-07	0.682951	0.710994	3.29964e-07	1	2	4	0.290471	1	0.569381	7.60236	7.40039
220	{ADAM9;COL1A1;COL7A1;LAMB3;SPP1;THBS2;TIMP2;TNC;VCAN;VEGFD}	{ITGB1}	R-HSA-5663220	RHO GTPases Activate Formins	3.00121e-07	6.66712e-07	0.682951	0.710994	3.29964e-07	1	1	2	0.953708	1	0.569381	7.60236	7.40039
221	{ADAM9;COL1A1;COL7A1;LAMB3;SPP1;THBS2;TIMP2;TNC;VCAN;VEGFD}	{ITGB1}	R-HSA-6785807	Interleukin-4 and Interleukin-13 signaling	5.85951e-08	2.5062e-07	0.682951	0.710994	3.29964e-07	1	56	102	0.410879	1	0.569381	7.60236	7.40039
222	{ADAM9;COL1A1;COL7A1;LAMB3;SPP1;THBS2;TIMP2;TNC;VCAN;VEGFD}	{ITGB1}	R-HSA-6806834	Signaling by MET	2.83437e-07	6.5542e-07	0.682951	0.710994	3.29964e-07	1	23	42	0.546953	1	0.569381	7.60236	7.40039
223	{ADAM9;COL1A1;COL7A1;LAMB3;SPP1;THBS2;TIMP2;TNC;VCAN;VEGFD}	{ITGB1}	R-HSA-75892	Platelet Adhesion to exposed collagen	1.14813e-07	3.74227e-07	0.682951	0.710994	3.29964e-07	1	1	3	0.703356	1	0.569381	7.60236	7.40039
224	{ADAM9;COL1A1;COL7A1;LAMB3;SPP1;THBS2;TIMP2;TNC;VCAN;VEGFD}	{ITGB1}	R-HSA-8874081	MET activates PTK2 signaling	2.64922e-07	6.52715e-07	0.682951	0.710994	3.29964e-07	1	8	16	0.633202	1	0.569381	7.60236	7.40039
225	{ADAM9;COL1A1;COL7A1;LAMB3;SPP1;THBS2;TIMP2;TNC;VCAN;VEGFD}	{ITGB1}	R-HSA-8875513	MET interacts with TNS proteins	1.04848e-07	3.65312e-07	0.682951	0.710994	3.29964e-07	1	1	3	0.682388	1	0.569381	7.60236	7.40039
226	{ADAM9;COL1A1;COL7A1;LAMB3;SPP1;THBS2;TIMP2;TNC;VCAN;VEGFD}	{ITGB1}	R-HSA-8875878	MET promotes cell motility	2.38179e-07	6.14019e-07	0.682951	0.710994	3.29964e-07	1	12	23	0.560448	1	0.569381	7.60236	7.40039
71	{GDF7}	{BMPR2}	R-HSA-201451	Signaling by BMP	0.000173553	0.000173553	0.517327	0.396896	0.000321963	1	7	14	0.547672	1	0.510932	5.69761	6.16424
72	{GDF7}	{BMPR2}	R-HSA-9006936	Signaling by TGF-beta family members	0.000124574	0.000124952	0.517327	0.396896	0.000321963	1	19	35	0.447686	1	0.510932	5.69761	6.16424
114	{THBS2}	{CD47}	R-HSA-391160	Signal regulatory protein family interactions	3.05128e-07	6.71827e-07	0.946078	0.444091	6.08534e-07	1	4	8	0.560448	1	0.53377	6.6576	6.33542

## Sheet: BSR_Inf_RedBestPath
	L	R	pw.id	pw.name	pval	qval	L.logFC	R.logFC	LR.pval	LR.corr	rank	len	rank.pval	rank.corr	LR.score	L.expr	R.expr
11	ADAM9	ITGAV	R-HSA-373760	L1CAM interactions	1.0656e-08	7.50457e-08	0.682951	0.705837	5.72586e-07	1	15	29	0.315086	1	0.542651	6.11748	7.40557
27	ADAM9	ITGB1	R-HSA-210991	Basigin interactions	9.08256e-11	6.57509e-09	0.682951	0.710994	3.29964e-07	1	6	11	0.0987146	1	0.542564	6.11748	7.40039
311	CALR	ITGAV	R-HSA-373760	L1CAM interactions	1.586e-07	4.72943e-07	0.452609	0.705837	8.52215e-06	1	15	29	0.315086	1	0.592737	9.20448	7.40557
411	COL1A1	ITGAV	R-HSA-373760	L1CAM interactions	1.79959e-07	5.04801e-07	1.25249	0.705837	9.66985e-06	1	15	29	0.315086	1	0.569466	7.60236	7.40557
57	COL1A1	ITGB1	R-HSA-210991	Basigin interactions	1.53386e-09	2.63047e-08	1.25249	0.710994	5.57244e-06	1	6	11	0.0987146	1	0.569381	7.60236	7.40039
67	COL7A1	ITGB1	R-HSA-210991	Basigin interactions	2.49398e-09	3.27178e-08	0.429529	0.710994	9.06048e-06	1	6	11	0.0987146	1	0.536123	5.80834	7.40039
72	GDF7	BMPR2	R-HSA-9006936	Signaling by TGF-beta family members	0.000124574	0.000124952	0.517327	0.396896	0.000321963	1	19	35	0.447686	1	0.510932	5.69761	6.16424
87	LAMB3	ITGB1	R-HSA-210991	Basigin interactions	1.92741e-09	3.03796e-08	0.476656	0.710994	7.00216e-06	1	6	11	0.0987146	1	0.533728	5.69759	7.40039
911	SPP1	ITGAV	R-HSA-373760	L1CAM interactions	1.55031e-08	9.85098e-08	0.666498	0.705837	8.33034e-07	1	15	29	0.315086	1	0.543294	6.14927	7.40557
107	SPP1	ITGB1	R-HSA-210991	Basigin interactions	1.32139e-10	6.57509e-09	0.666498	0.710994	4.80052e-07	1	6	11	0.0987146	1	0.543207	6.14927	7.40039
111	THBS2	CD47	R-HSA-1500931	Cell-Cell communication	5.39043e-08	2.34767e-07	0.946078	0.444091	6.08534e-07	1	7	13	0.322464	1	0.53377	6.6576	6.33542
127	THBS2	ITGB1	R-HSA-210991	Basigin interactions	1.77807e-12	5.88542e-10	0.946078	0.710994	6.45963e-09	1	6	11	0.0987146	1	0.553043	6.6576	7.40039
137	TIMP2	ITGB1	R-HSA-210991	Basigin interactions	1.10291e-10	6.57509e-09	0.576926	0.710994	4.00679e-07	1	6	11	0.0987146	1	0.565792	7.38328	7.40039
1410	TNC	ITGAV	R-HSA-373760	L1CAM interactions	1.17524e-07	3.75934e-07	0.548792	0.705837	6.31501e-06	1	15	29	0.315086	1	0.538283	5.90603	7.40557
156	TNC	ITGB1	R-HSA-210991	Basigin interactions	1.00171e-09	2.07228e-08	0.548792	0.710994	3.63914e-06	1	6	11	0.0987146	1	0.538196	5.90603	7.40039
166	VCAN	ITGB1	R-HSA-210991	Basigin interactions	9.74338e-10	2.07228e-08	0.502606	0.710994	3.53971e-06	1	6	11	0.0987146	1	0.535985	5.8019	7.40039
176	VEGFD	ITGB1	R-HSA-210991	Basigin interactions	2.6622e-09	3.27178e-08	0.398595	0.710994	9.6716e-06	1	6	11	0.0987146	1	0.540048	5.99475	7.40039

## Sheet: BSR_Inf_RedReceptor
	L	R	pw.id	pw.name	pval	qval	L.logFC	R.logFC	LR.pval	LR.corr	rank	len	rank.pval	rank.corr	LR.score	L.expr	R.expr
11	{ADAM9;CALR;COL1A1;SPP1;TNC}	ITGAV	R-HSA-373760	L1CAM interactions	1.0656e-08	7.50457e-08	0.682951	0.705837	5.72586e-07	1	15	29	0.315086	1	0.592737	9.20448	7.40557
27	{ADAM9;COL1A1;COL7A1;LAMB3;SPP1;THBS2;TIMP2;TNC;VCAN;VEGFD}	ITGB1	R-HSA-210991	Basigin interactions	9.08256e-11	6.57509e-09	0.682951	0.710994	3.29964e-07	1	6	11	0.0987146	1	0.569381	7.60236	7.40039
72	{GDF7}	BMPR2	R-HSA-9006936	Signaling by TGF-beta family members	0.000124574	0.000124952	0.517327	0.396896	0.000321963	1	19	35	0.447686	1	0.510932	5.69761	6.16424
111	{THBS2}	CD47	R-HSA-1500931	Cell-Cell communication	5.39043e-08	2.34767e-07	0.946078	0.444091	6.08534e-07	1	7	13	0.322464	1	0.53377	6.6576	6.33542
