# Supplementary material for: Spatial Transcriptomics of Perineural Invasion in Pancreatic Ductal Adenocarcinomas
Source: Research Square preprint supplement (doi:10.21203/rs.3.rs-5253213/v1), 2024-12-02
Supplement: Supplementary file 2 [file 510bd7c776a9e5907be1b157.xlsx]

## Sheet: OptimisationPlate_LabWorksheet_
Supplementary Table 1. Summary of all AOIs or ROIs collected in the study, DSP output with Nuclei counts, reads counts and saturation. Columns at the end include our QC and indicate which samples were included in the differential analyses. PanCK (cancer) analysis included AOIs >200 nuclei but <700 nuclei, and nerve analysis included Full ROI (PGP9.5 positive).
SampleID	SlideName	ScanLabel	ROILabel	SegmentLabel	SegmentDisplayName	CD68	PanCK	PGP9.5	Everything else	QCFlags	AOISurfaceArea	AOINucleiCount	ROICoordinateX	ROICoordinateY	RawReads	AlignedReads	DeduplicatedReads	TrimmedReads	StitchedReads	SequencingSaturation	SequencingSetID	UMIQ30	RTSQ30	GeoMxNgsPipelineVersion	LOT_Human_NGS_Whole_Transcriptome_Atlas_RNA	PNI Status	ROIID	SegmentID	ScanWidth	ScanHeight	ScanOffsetX	ScanOffsetY	PatientID	Type	Pass or failed QC	Decision	Included in the analysis	old_segment_name	NegGeoMean	NegGeoSD	LOQ	Genes_pass_LOQ	Gene_Geo_Mean
1875|001|PanCK	slide_1875	8033184	001	PanCK	1875 | 001 | PanCK	FALSE	TRUE	FALSE	FALSE	NA	158014	1133	25036	49327.4	45839814	43660780	1126932	45202058	45202058	97.4189	VH01008:20:AAANNKJHV	0.9891	0.9892	DRAGEN_GeoMx_3.8.4-96	HWTA21004	nonPNI	324eb097-7707-4a67-8eb1-823a66e04a57	2ba85b48-778b-400b-bb68-33206e3fe669	35386.6	70360.2	6882	5780	1875	PanCK_nonPNI	PASSED	removed large AOI	No	8033184 | 001 | PanCK	35.7754	1.3029	38.3812	11972	46.269
1875|002|PanCK	slide_1875	8033184	002	PanCK	1875 | 002 | PanCK	FALSE	TRUE	FALSE	FALSE	NA	143134	1058	23323.2	49662.3	60764189	57840892	1672270	59896902	59896902	97.1088	VH01008:20:AAANNKJHV	0.9885	0.989	DRAGEN_GeoMx_3.8.4-96	HWTA21004	nonPNI	5af761a4-7bd7-4d6b-a211-014cc6d4fbd7	fb5f3f8e-a40e-4648-81f5-fcf2c1035165	35386.6	70360.2	6882	5780	1875	PanCK_nonPNI	PASSED	removed large AOI	No	8033184 | 002 | PanCK	53.9488	1.3175	56.5837	12471	68.672
1875|003|PanCK	slide_1875	8033184	003	PanCK	1875 | 003 | PanCK	FALSE	TRUE	FALSE	FALSE	NA	115559	853	21882	47671.5	35547743	33833948	928036	35037951	35037951	97.2571	VH01008:20:AAANNKJHV	0.9888	0.9892	DRAGEN_GeoMx_3.8.4-96	HWTA21004	nonPNI	72ee7384-ce19-4d74-af1e-b92c296bce11	730662c8-7ac8-4a69-9ae8-697d428b99a8	35386.6	70360.2	6882	5780	1875	PanCK_nonPNI	PASSED	removed large AOI	No	8033184 | 003 | PanCK	29.4111	1.3351	32.0814	11176	37.6652
1875|004|PanCK	slide_1875	8033184	004	PanCK	1875 | 004 | PanCK	FALSE	TRUE	FALSE	FALSE	NA	23127	230	11507.5	46566.8	5414352	5159353	187387	5339467	5339467	96.368	VH01008:20:AAANNKJHV	0.9882	0.9888	DRAGEN_GeoMx_3.8.4-96	HWTA21004	PNI	9406cdc2-251d-4909-8b1e-eabfbf9d6395	f164b459-f84d-41f1-89d3-96a860b28f4b	35386.6	70360.2	6882	5780	1875	PanCK_PNI	PASSED	removed unmatched non-PIN	No	8033184 | 004 | PanCK	5.711	1.6668	9.0447	5388	7.16423
1875|005|PanCK	slide_1875	8033184	005	PanCK	1875 | 005 | PanCK	FALSE	TRUE	FALSE	FALSE	NA	28448.7	245	11019.5	47958	10058474	9578398	243687	9917706	9917706	97.4559	VH01008:20:AAANNKJHV	0.989	0.9884	DRAGEN_GeoMx_3.8.4-96	HWTA21004	PNI	6ce95cc2-1ef8-4916-8dce-9bfecf12c932	fc39d220-5217-49c3-abf9-e710df6e82ed	35386.6	70360.2	6882	5780	1875	PanCK_PNI	PASSED	removed unmatched non-PIN	No	8033184 | 005 | PanCK	7.5045	1.507	10.5185	7658	9.53332
1875|006|FullROI	slide_1875	8033184	006	FullROI	1875 | 006 | FullROI	FALSE	FALSE	FALSE	FALSE	NA	16367.3	106	13187	44221	4368952	4165135	129547	4307041	4307041	96.8897	VH01008:20:AAANNKJHV	0.9887	0.989	DRAGEN_GeoMx_3.8.4-96	HWTA21004	PNI	f3861455-6446-483c-b3dd-3ce76f8d3761	5509e7ca-a2b3-46d8-a85e-4d74a75d1b40	35386.6	70360.2	6882	5780	1875	PanCK_PNI	PASSED	removed small AOI	No	8033184 | 006 | Full ROI	3.7029	1.8221	7.347	4383	4.8588
1875|001|PGP9.5	slide_1875	8033184	001	PGP9.5	1875 | 001 | PGP9.5	FALSE	FALSE	TRUE	FALSE	NA	5401.31	66	25036	49327.4	2180877	2081664	53308	2150583	2150583	97.4392	VH01008:20:AAANNKJHV	0.9888	0.989	DRAGEN_GeoMx_3.8.4-96	HWTA21004	nonPNI	324eb097-7707-4a67-8eb1-823a66e04a57	8adf605b-7172-411b-9978-6cf4770ac0f5	35386.6	70360.2	6882	5780	1875	PGP9.5_nonPNI	FAILED QC	remove no nerve	No	8033184 | 001 | PGP9.5	2.0323	1.7917	5.6157	1348	2.2219
1875|007|PGP9.5	slide_1875	8033184	007	PGP9.5	1875 | 007 | PGP9.5	FALSE	FALSE	TRUE	FALSE	NA	17789	67	16887.3	63984.1	1866071	1774805	57262	1838762	1838762	96.7736	VH01008:20:AAANNKJHV	0.9894	0.9892	DRAGEN_GeoMx_3.8.4-96	HWTA21004	nonPNI	f177e56a-31cb-4515-99b0-0aae936e1def	67b58e97-62ca-46b5-860a-abb3833380e8	35386.6	70360.2	6882	5780	1875	PGP9.5_nonPNI	FAILED QC	<100 nuclei	No	8033184 | 007 | PGP9.5	2.327	1.883	6.0931	830	2.48371
1875|008|PGP9.5	slide_1875	8033184	008	PGP9.5	1875 | 008 | PGP9.5	FALSE	FALSE	TRUE	FALSE	NA	11245.4	46	16085.6	64133.8	1236444	1183748	28868	1218950	1218950	97.5613	VH01008:20:AAANNKJHV	0.9885	0.9886	DRAGEN_GeoMx_3.8.4-96	HWTA21004	nonPNI	245a2ce7-e4b5-432f-af4e-906ad01742b3	02ce245f-e6be-4f70-959d-362577945ae5	35386.6	70360.2	6882	5780	1875	PGP9.5_nonPNI	FAILED QC	<100 nuclei	No	8033184 | 008 | PGP9.5	1.5069	1.8129	5.1327	278	1.46214
1875|009|PGP9.5	slide_1875	8033184	009	PGP9.5	1875 | 009 | PGP9.5	FALSE	FALSE	TRUE	FALSE	NA	16996.2	88	15638.1	63618	2310342	2197684	56814	2276252	2276252	97.4148	VH01008:20:AAANNKJHV	0.9891	0.9892	DRAGEN_GeoMx_3.8.4-96	HWTA21004	nonPNI	97fb79be-0113-41c1-8840-efd04d44e4ca	c6d9f89b-c633-4c63-b06d-9655e9310c45	35386.6	70360.2	6882	5780	1875	PGP9.5_nonPNI	FAILED QC	<100 nuclei	No	8033184 | 009 | PGP9.5	2.0399	1.8513	5.7426	1674	2.42831
1875|004|PGP9.5	slide_1875	8033184	004	PGP9.5	1875 | 004 | PGP9.5	FALSE	FALSE	TRUE	FALSE	NA	8335.8	77	11507.5	46566.8	2136074	2040327	55015	2106255	2106255	97.3036	VH01008:20:AAANNKJHV	0.9895	0.9891	DRAGEN_GeoMx_3.8.4-96	HWTA21004	PNI	9406cdc2-251d-4909-8b1e-eabfbf9d6395	c8b3789d-cd21-4d55-92f3-ef40df60c3ab	35386.6	70360.2	6882	5780	1875	PGP9.5_PNI	FAILED QC	<100 nuclei	No	8033184 | 004 | PGP9.5	2.014	1.7991	5.6122	1533	2.302
1875|005|PGP9.5	slide_1875	8033184	005	PGP9.5	1875 | 005 | PGP9.5	FALSE	FALSE	TRUE	FALSE	NA	19686.8	123	11019.5	47958	2294622	2187723	72095	2263201	2263201	96.7046	VH01008:20:AAANNKJHV	0.9883	0.9895	DRAGEN_GeoMx_3.8.4-96	HWTA21004	PNI	6ce95cc2-1ef8-4916-8dce-9bfecf12c932	69b23fef-aba9-4c3e-923e-8ddfb0e0e8e7	35386.6	70360.2	6882	5780	1875	PGP9.5_PNI	PASSED	removed small AOI	No	8033184 | 005 | PGP9.5	2.3424	1.8353	6.0131	1711	2.93235
1875|010|FullROI	slide_1875	8033184	010	FullROI	1875 | 010 | FullROI	FALSE	FALSE	FALSE	FALSE	NA	13719.9	65	13285	44340	2332031	2224034	55027	2300375	2300375	97.5258	VH01008:20:AAANNKJHV	0.9886	0.9889	DRAGEN_GeoMx_3.8.4-96	HWTA21004	PNI	283865e5-9e2c-4745-8acf-c74d0a27b960	b3286c48-f289-46ed-9612-6ffe147dd1ad	35386.6	70360.2	6882	5780	1875	PGP9.5_PNI	FAILED QC	<100 nuclei	No	8033184 | 010 | Full ROI	1.8929	1.8425	5.5778	1425	2.27361
1877|002|PanCK	slide_1877	8033171	002	PanCK	1877 | 002 | PanCK	FALSE	TRUE	FALSE	FALSE	NA	8325.75	55	27306.9	31320.2	2068891	1969360	63228	2039742	2039742	96.7894	VH01008:20:AAANNKJHV	0.9891	0.9893	DRAGEN_GeoMx_3.8.4-96	HWTA21004	nonPNI	48eb48fa-5319-401c-99c9-25202e16d4ed	9d25de0f-c3f8-4198-ab66-1113f64c4797	35384.5	61212.3	6884	2162	1877	PanCK_nonPNI	FAILED QC	<100 nuclei	No	8033171 | 002 | PanCk	1.6996	1.7098	5.1192	1023	2.02702
1877|003|PanCK	slide_1877	8033171	003	PanCK	1877 | 003 | PanCK	FALSE	TRUE	FALSE	FALSE	NA	39279.1	106	24617.5	46784	5002663	4757876	145018	4932412	4932412	96.952	VH01008:20:AAANNKJHV	0.9886	0.989	DRAGEN_GeoMx_3.8.4-96	HWTA21004	nonPNI	a4bade73-6b27-41ac-ab6c-aaae5183e829	4399557f-9996-4640-9de4-337c7ec40919	35384.5	61212.3	6884	2162	1877	PanCK_nonPNI	PASSED	removed small AOI	No	8033171 | 003 | PanCk	4.7106	1.828	8.3665	4670	5.89508
1877|004|PanCK	slide_1877	8033171	004	PanCK	1877 | 004 | PanCK	FALSE	TRUE	FALSE	FALSE	NA	89467.8	338	29160	49995.3	27689129	26369235	436871	27297553	27297553	98.3433	VH01008:20:AAANNKJHV	0.9893	0.9894	DRAGEN_GeoMx_3.8.4-96	HWTA21004	nonPNI	81dcabc2-e80a-4b69-84d5-baa050e5c230	31019d8b-6daf-4f01-b4eb-e644115b017c	35384.5	61212.3	6884	2162	1877	PanCK_nonPNI	PASSED	keep	1877|004|PanCK	8033171 | 004 | PanCk	12.7681	1.4619	15.692	10885	17.4846
1877|005|PanCK	slide_1877	8033171	005	PanCK	1877 | 005 | PanCK	FALSE	TRUE	FALSE	FALSE	NA	60276.8	183	29978.5	52267.9	9457355	9006033	256635	9329585	9329585	97.1504	VH01008:20:AAANNKJHV	0.9889	0.9891	DRAGEN_GeoMx_3.8.4-96	HWTA21004	nonPNI	a04c8afe-0f4d-422e-989f-e227abcf9a9f	a26615d9-967e-4e3d-b543-540d56333b7c	35384.5	61212.3	6884	2162	1877	PanCK_nonPNI	PASSED	keep	No	8033171 | 005 | PanCk	9.293	1.4478	12.1886	7253	11.1769
1877|006|PanCK	slide_1877	8033171	006	PanCK	1877 | 006 | PanCK	FALSE	TRUE	FALSE	FALSE	NA	59329.2	365	18240	28930	13463552	12815555	356216	13275045	13275045	97.2204	VH01008:20:AAANNKJHV	0.9884	0.989	DRAGEN_GeoMx_3.8.4-96	HWTA21004	PNI	710872f7-c718-4f9c-b5c7-15d6a37c1130	0835952c-b99a-4337-b395-db007f015d6f	35384.5	61212.3	6884	2162	1877	PanCK_PNI	PASSED	keep	1877|006|PanCK	8033171 | 006 | PanCk	12.4474	1.4977	15.4428	8830	15.2365
1877|002|PGP9.5	slide_1877	8033171	002	PGP9.5	1877 | 002 | PGP9.5	FALSE	FALSE	TRUE	FALSE	NA	5080.11	42	27306.9	31320.2	1747138	1660733	49727	1723796	1723796	97.0057	VH01008:20:AAANNKJHV	0.9891	0.9891	DRAGEN_GeoMx_3.8.4-96	HWTA21004	nonPNI	48eb48fa-5319-401c-99c9-25202e16d4ed	8731b059-ad06-4520-a3ff-87ed6820a6b5	35384.5	61212.3	6884	2162	1877	PGP9.5_nonPNI	FAILED QC	<100 nuclei	No	8033171 | 002 | PGP95	1.8992	1.8021	5.5034	2013	2.39336
1877|004|PGP9.5	slide_1877	8033171	004	PGP9.5	1877 | 004 | PGP9.5	FALSE	FALSE	TRUE	FALSE	NA	5674.96	52	29160	49995.3	1640794	1566343	45413	1618253	1618253	97.1007	VH01008:20:AAANNKJHV	0.9891	0.9892	DRAGEN_GeoMx_3.8.4-96	HWTA21004	nonPNI	81dcabc2-e80a-4b69-84d5-baa050e5c230	fe941fc6-73c4-4810-89ae-d6ac55917de6	35384.5	61212.3	6884	2162	1877	PGP9.5_nonPNI	FAILED QC	<100 nuclei	No	8033171 | 004 | PGP95	1.7166	1.7352	5.187	829	1.87069
1877|005|PGP9.5	slide_1877	8033171	005	PGP9.5	1877 | 005 | PGP9.5	FALSE	FALSE	TRUE	FALSE	NA	591.973	9	29978.5	52267.9	279325	266442	9809	275298	275298	96.3185	VH01008:20:AAANNKJHV	0.9892	0.9891	DRAGEN_GeoMx_3.8.4-96	HWTA21004	nonPNI	a04c8afe-0f4d-422e-989f-e227abcf9a9f	32386209-f26d-4c63-aae1-4926dd99b678	35384.5	61212.3	6884	2162	1877	PGP9.5_nonPNI	FAILED QC	<100 nuclei	No	8033171 | 005 | PGP95	1.0573	1.2281	3.5135	93	1.07716
1877|006|PGP9.5	slide_1877	8033171	006	PGP9.5	1877 | 006 | PGP9.5	FALSE	FALSE	TRUE	FALSE	NA	1196.71	8	18240	28930	686795	654870	20543	677416	677416	96.863	VH01008:20:AAANNKJHV	0.9892	0.9887	DRAGEN_GeoMx_3.8.4-96	HWTA21004	PNI	710872f7-c718-4f9c-b5c7-15d6a37c1130	c0e68421-fec7-47a0-8e69-2d47588aac80	35384.5	61212.3	6884	2162	1877	PGP9.5_PNI	FAILED QC	<100 nuclei	No	8033171 | 006 | PGP95	1.2982	1.5479	4.394	166	1.28372
1898|009|FullROI	slide_1898	8033208	009	FullROI	1898 | 009 | FullROI	FALSE	FALSE	FALSE	FALSE	NA	337866	461	29482.4	38082.8	34188082	32545286	870947	33721243	33721243	97.3239	VH01008:20:AAANNKJHV	0.9892	0.9897	DRAGEN_GeoMx_3.8.4-96	HWTA21004	nonPNI	68b083b9-68a9-476d-a4b3-1bc4b7653eb9	46c05c92-0145-4ddd-b862-1d7ff159d0b5	35428.8	48286.3	6861	433	1898	PanCK_nonPNI	PASSED	removed unmatched PIN	No	8033208 | 009 | Full ROI	38.2008	1.3045	40.8098	10144	41.7293
1898|010|FullROI	slide_1898	8033208	010	FullROI	1898 | 010 | FullROI	FALSE	FALSE	FALSE	FALSE	NA	340344	310	32452.4	37910.8	21842619	20782046	548810	21534084	21534084	97.3592	VH01008:20:AAANNKJHV	0.9886	0.9891	DRAGEN_GeoMx_3.8.4-96	HWTA21004	nonPNI	da365dc2-124d-4d90-be76-eab1997844d2	4452f751-6118-4059-afe4-af9769547a81	35428.8	48286.3	6861	433	1898	PanCK_nonPNI	PASSED	removed unmatched PIN	No	8033208 | 010 | Full ROI	24.1385	1.3779	26.8943	9198	26.2082
1898|011|FullROI	slide_1898	8033208	011	FullROI	1898 | 011 | FullROI	FALSE	FALSE	FALSE	FALSE	NA	337866	459	27317.9	37172.1	31881406	30369586	838105	31447693	31447693	97.2403	VH01008:20:AAANNKJHV	0.9889	0.9893	DRAGEN_GeoMx_3.8.4-96	HWTA21004	nonPNI	aced9fd0-938c-4670-87f5-091ac0bf6439	7e226e5f-b2a9-4fc2-b106-99d50392aa9e	35428.8	48286.3	6861	433	1898	PanCK_nonPNI	PASSED	removed unmatched PIN	No	8033208 | 011 | Full ROI	39.2482	1.3097	41.8676	9235	41.072
1898|002|PanCK	slide_1898	8033208	002	PanCK	1898 | 002 | PanCK	FALSE	TRUE	FALSE	FALSE	NA	9616.92	67	29228	23689.6	3477987	3312412	88239	3428545	3428545	97.3361	VH01008:20:AAANNKJHV	0.9888	0.9894	DRAGEN_GeoMx_3.8.4-96	HWTA21004	PNI	c1132c66-df64-4e65-9a59-54d9fadc1463	d8e273bc-614c-43dd-808c-f71936861ec7	35428.8	48286.3	6861	433	1898	PanCK_PNI	PASSED	removed small AOI	No	8033208 | 002 | PANCK	2.7685	1.8919	6.5523	2598	3.36448
1898|003|PanCK	slide_1898	8033208	003	PanCK	1898 | 003 | PanCK	FALSE	TRUE	FALSE	FALSE	NA	19492	181	31236	23190	5941809	5658132	161590	5858378	5858378	97.1441	VH01008:20:AAANNKJHV	0.9892	0.9891	DRAGEN_GeoMx_3.8.4-96	HWTA21004	PNI	9d32497e-b0a2-4294-aea2-ecb8eac49971	4231fab2-2142-48ac-9283-d38b8f2260a7	35428.8	48286.3	6861	433	1898	PanCK_PNI	PASSED	removed small AOI	No	8033208 | 003 | PANCK	5.1259	1.7876	8.701	5422	6.42142
1898|006|PanCK	slide_1898	8033208	006	PanCK	1898 | 006 | PanCK	FALSE	TRUE	FALSE	FALSE	NA	20619	100	34043	28120	3999426	3798363	115268	3939667	3939667	96.9653	VH01008:20:AAANNKJHV	0.9878	0.9891	DRAGEN_GeoMx_3.8.4-96	HWTA21004	PNI	e5a48d72-d019-4320-bfa4-fbfc767c979a	5b4ef6bc-2cc2-4842-b5ab-bf6bf72a46c9	35428.8	48286.3	6861	433	1898	PanCK_PNI	PASSED	removed small AOI	No	8033208 | 006 | PANCK	3.7338	1.712	7.1577	3357	4.43966
1898|008|PanCK	slide_1898	8033208	008	PanCK	1898 | 008 | PanCK	FALSE	TRUE	FALSE	FALSE	NA	17081.8	64	31614	24090	4327707	4119367	113063	4266983	4266983	97.2553	VH01008:20:AAANNKJHV	0.9895	0.9888	DRAGEN_GeoMx_3.8.4-96	HWTA21004	PNI	90bba178-55d9-4a4e-b88c-a39eee506af5	b3b179b5-df60-42f0-a501-0a94cb73278f	35428.8	48286.3	6861	433	1898	PanCK_PNI	FAILED QC	removed small AOI	No	8033208 | 008 | PANCK	3.6377	1.8622	7.362	3322	4.45927
1898|001|FullROI	slide_1898	8033208	001	FullROI	1898 | 001 | FullROI	FALSE	FALSE	FALSE	FALSE	NA	135539	640	18976	7838.82	15105918	14351563	405992	14884713	14884713	97.1711	VH01008:20:AAANNKJHV	0.989	0.9891	DRAGEN_GeoMx_3.8.4-96	HWTA21004	nonPNI	33b0d897-5802-4d7f-b7d5-a13fec037d3e	5fd02492-2b24-4ef7-9cc0-20b921eeaf2c	35428.8	48286.3	6861	433	1898	PGP9.5_nonPNI	PASSED	keep	1898|001|FullROI	8033208 | 001 | Full ROI	18.0122	1.3505	20.7132	7872	19.1181
1898|004|PGP9.5	slide_1898	8033208	004	PGP9.5	1898 | 004 | PGP9.5	FALSE	FALSE	TRUE	FALSE	NA	46148.3	259	35153	28876	7992601	7612783	206899	7883185	7883185	97.2822	VH01008:20:AAANNKJHV	0.9892	0.9888	DRAGEN_GeoMx_3.8.4-96	HWTA21004	PNI	1014aced-ee02-41a9-8c72-d3b161dd19c3	05cc9eb6-5552-4dc3-bf9e-9e647bde5853	35428.8	48286.3	6861	433	1898	PGP9.5_PNI	PASSED	keep	No	8033208 | 004 | PGP9.5	8.0018	1.5295	11.0607	5583	9.12591
1898|005|PGP9.5	slide_1898	8033208	006	PGP9.5	1898 | 005 | PGP9.5	FALSE	FALSE	TRUE	FALSE	NA	22168.5	136	33624	27772	3962970	3774419	97295	3907285	3907285	97.4223	VH01008:20:AAANNKJHV	0.9893	0.9894	DRAGEN_GeoMx_3.8.4-96	HWTA21004	PNI	340f4260-ea8a-4472-8df3-0c6618faf9bd	18745308-a9db-49e3-a32d-5f0d9944dea6	35428.8	48286.3	6861	433	1898	PGP9.5_PNI	PASSED	removed small AOI	No	8033208 | 005 | PGP9.5	3.2571	1.9191	7.0953	2463	3.97341
1898|007|FullROI	slide_1898	8033208	007	FullROI	1898 | 007 | FullROI	FALSE	FALSE	FALSE	FALSE	NA	54054.6	244	31588	23514	4466128	4249806	142800	4404550	4404550	96.6398	VH01008:20:AAANNKJHV	0.9886	0.9895	DRAGEN_GeoMx_3.8.4-96	HWTA21004	PNI	4b8b00c5-575a-4ff4-a234-03b6aa5a62da	2fdd6b0e-adfb-4778-b2d1-8bfa0ec15363	35428.8	48286.3	6861	433	1898	PGP9.5_PNI	PASSED	keep	1898|007|FullROI	8033208 | 007 | Full ROI	5.7638	1.5897	8.9431	5434	6.37331
1938|001|PanCK	slide_1938	8033268	001	PanCK	1938 | 001 | PanCK	FALSE	TRUE	FALSE	FALSE	NA	89862.5	586	19115.6	37214.9	22016305	20948204	590970	21695948	21695948	97.1789	VH01008:20:AAANNKJHV	0.9891	0.9892	DRAGEN_GeoMx_3.8.4-96	HWTA21004	nonPNI	0b247c85-20bb-4e03-a5e7-c4a9a69c1e78	eaaab176-ad3b-40e9-8a83-fced7706ebf1	35544.1	62977.1	6804	1279	1938	PanCK_nonPNI	PASSED	keep	1938|001|PanCK	8033268 | 001 | PanCK	25.561	1.4592	28.4795	7189	26.5092
1938|002|PanCK	slide_1938	8033268	002	PanCK	1938 | 002 | PanCK	FALSE	TRUE	FALSE	FALSE	NA	71479.5	397	21834.3	37497.4	27001376	25732390	746096	26610358	26610358	97.1006	VH01008:20:AAANNKJHV	0.9888	0.9892	DRAGEN_GeoMx_3.8.4-96	HWTA21004	nonPNI	150abac1-0cd6-4b5a-a996-8a113a7bd20a	ff7059c3-7c7b-4141-bf4f-860832973d8c	35544.1	62977.1	6804	1279	1938	PanCK_nonPNI	PASSED	keep	1938|002|PanCK	8033268 | 002 | PanCK	34.5373	1.4268	37.3909	6183	33.9156
1938|003|PanCK	slide_1938	8033268	003	PanCK	1938 | 003 | PanCK	FALSE	TRUE	FALSE	FALSE	NA	86294.1	557	26633.1	38551.8	10337597	9843578	270451	10188159	10188159	97.2525	VH01008:20:AAANNKJHV	0.9888	0.9893	DRAGEN_GeoMx_3.8.4-96	HWTA21004	nonPNI	dfa1f8b5-c3e1-406a-a466-3694946095bf	f5c3ef03-6d5c-4b6b-88a5-38ce18f20b81	35544.1	62977.1	6804	1279	1938	PanCK_nonPNI	PASSED	keep	1938|003|PanCK	8033268 | 003 | PanCK	10.9466	1.5648	14.0763	4843	11.2624
1938|004|PanCK	slide_1938	8033268	004	PanCK	1938 | 004 | PanCK	FALSE	TRUE	FALSE	FALSE	NA	51773.3	335	20493.9	38953.8	7380707	7020880	220545	7271028	7271028	96.8587	VH01008:20:AAANNKJHV	0.9887	0.9887	DRAGEN_GeoMx_3.8.4-96	HWTA21004	nonPNI	71e98be7-23fb-486f-b15c-209a6925802b	69b6aeab-eb88-4ec0-9d7d-8896a6aab7bd	35544.1	62977.1	6804	1279	1938	PanCK_nonPNI	PASSED	keep	1938|004|PanCK	8033268 | 004 | PanCK	9.22	1.6546	12.5293	4283	9.01655
1938|006|PanCK	slide_1938	8033268	006	PanCK	1938 | 006 | PanCK	FALSE	TRUE	FALSE	FALSE	NA	32847.1	148	28020	44714	4998948	4756906	135569	4928015	4928015	97.1501	VH01008:20:AAANNKJHV	0.9891	0.9886	DRAGEN_GeoMx_3.8.4-96	HWTA21004	PNI	b5d32c21-6a6a-46a5-9c7d-b332a2291e66	20524f47-911a-420c-8232-a5ecd96b533f	35544.1	62977.1	6804	1279	1938	PanCK_PNI	PASSED	keep	No	8033268 | 006 | PanCK	4.3905	1.8811	8.1528	3807	5.41151
1938|007|PanCK	slide_1938	8033268	007	PanCK	1938 | 007 | PanCK	FALSE	TRUE	FALSE	FALSE	NA	52219.5	369	23244	56218	9220446	8768587	252613	9094439	9094439	97.1191	VH01008:20:AAANNKJHV	0.9893	0.9892	DRAGEN_GeoMx_3.8.4-96	HWTA21004	PNI	733f7e97-7590-4efd-845e-90c8952d2be1	dff2033d-29d8-4aeb-a450-dcca801048f9	35544.1	62977.1	6804	1279	1938	PanCK_PNI	PASSED	keep	1938|007|PanCK	8033268 | 007 | PanCK	12.2232	1.9229	16.069	2723	10.3191
1938|009|PanCK	slide_1938	8033268	008	PanCK	1938 | 009 | PanCK	FALSE	TRUE	FALSE	FALSE	NA	28992.1	310	21551.5	55976.7	18811368	17900841	469951	18546718	18546718	97.3747	VH01008:20:AAANNKJHV	0.9889	0.9892	DRAGEN_GeoMx_3.8.4-96	HWTA21004	PNI	6e6d2a73-1e51-454d-98f3-f4fb829dba40	81d2ba7d-9d11-45a0-bced-44e4073e09a2	35544.1	62977.1	6804	1279	1938	PanCK_PNI	PASSED	keep	1938|009|PanCK	8033268 | 009 | PanCK	21.9917	1.7743	25.5402	4099	19.4572
1938|011|PanCK	slide_1938	8033268	011	PanCK	1938 | 011 | PanCK	FALSE	TRUE	FALSE	FALSE	NA	45777.8	383	21602	45710	5748029	5466018	175450	5665121	5665121	96.7902	VH01008:20:AAANNKJHV	0.9891	0.9894	DRAGEN_GeoMx_3.8.4-96	HWTA21004	PNI	9e7b001a-c91b-48c5-99ce-6ada97651d3a	b190e249-ba22-4bd1-a207-36e67e483c02	35544.1	62977.1	6804	1279	1938	PanCK_PNI	PASSED	keep	1938|011|PanCK	8033268 | 011 | PanCK	7.4002	1.8164	11.033	3091	7.17213
1938|013|PanCK	slide_1938	8033268	013	PanCK	1938 | 013 | PanCK	FALSE	TRUE	FALSE	FALSE	NA	24735.8	173	20453	45188	4561654	4340131	116596	4498081	4498081	97.3135	VH01008:20:AAANNKJHV	0.989	0.9892	DRAGEN_GeoMx_3.8.4-96	HWTA21004	PNI	4da9afe9-fd22-4087-8714-e7f53fc938fd	72462c70-2b8b-45eb-8858-0b7573e2ebef	35544.1	62977.1	6804	1279	1938	PanCK_PNI	PASSED	keep	No	8033268 | 013 | PanCK	4.8232	1.9983	8.8197	2713	4.73926
1938|015|PanCK	slide_1938	8033268	015	PanCK	1938 | 015 | PanCK	FALSE	TRUE	FALSE	FALSE	NA	25987.6	246	26382	44415	9746585	9278760	274257	9610488	9610488	97.0442	VH01008:20:AAANNKJHV	0.9888	0.9888	DRAGEN_GeoMx_3.8.4-96	HWTA21004	PNI	7b2bc110-3b18-4319-89ba-57bb9209da97	16b79165-2fa5-4e53-8278-4b50ada36c7a	35544.1	62977.1	6804	1279	1938	PanCK_PNI	PASSED	keep	1938|015|PanCK	8033268 | 015 | PanCK	11.4505	1.5703	14.5912	5268	11.5117
1938|016|PanCK	slide_1938	8033268	016	PanCK	1938 | 016 | PanCK	FALSE	TRUE	FALSE	FALSE	NA	15611.2	124	25563.3	44115.6	3337231	3172411	89669	3287228	3287228	97.1735	VH01008:20:AAANNKJHV	0.9888	0.9892	DRAGEN_GeoMx_3.8.4-96	HWTA21004	PNI	3713b2ec-264d-4e43-9016-645120bbd630	db43928c-6fa4-48ba-8c83-85662034fca1	35544.1	62977.1	6804	1279	1938	PanCK_PNI	PASSED	keep	No	8033268 | 016 | PanCK	3.6114	2.0171	7.6456	1969	3.5183
1938|017|FullROI	slide_1938	8033268	017	FullROI	1938 | 017 | FullROI	FALSE	FALSE	FALSE	FALSE	NA	70323.8	229	27173	43970	19337023	18366111	467576	19048448	19048448	97.4541	VH01008:20:AAANNKJHV	0.9887	0.9888	DRAGEN_GeoMx_3.8.4-96	HWTA21004	PNI	580358de-1247-48fc-b886-d698a68df5f5	7183f9bd-04d5-4134-9494-2a90e0e752a2	35544.1	62977.1	6804	1279	1938	PanCK_PNI	PASSED	keep	No	8033268 | 017 | Full ROI	19.6318	1.3955	22.4228	7819	21.1136
1938|018|FullROI	slide_1938	8033268	018	FullROI	1938 | 018 | FullROI	FALSE	FALSE	FALSE	FALSE	NA	21162.6	176	21759	56857	4679032	4456968	113338	4612970	4612970	97.4571	VH01008:20:AAANNKJHV	0.989	0.9892	DRAGEN_GeoMx_3.8.4-96	HWTA21004	PNI	b3e6bf68-5fd5-4ce3-a156-a2af6ef180b6	ab0b2a19-c6f3-4cd9-8419-c56b51e931bc	35544.1	62977.1	6804	1279	1938	PanCK_PNI	PASSED	keep	No	8033268 | 018 | Full ROI	5.0944	2.048	9.1905	1793	4.32067
1938|005|FullROI	slide_1938	8033268	005	FullROI	1938 | 005 | FullROI	FALSE	FALSE	FALSE	FALSE	NA	155334	577	21313	45047	20506536	19491474	582904	20198166	20198166	97.0094	VH01008:20:AAANNKJHV	0.9886	0.9885	DRAGEN_GeoMx_3.8.4-96	HWTA21004	PNI	0b506cd9-7af2-402f-af8c-2b348bb76784	e16ce229-46a8-4b2a-9abb-bf9be1f20ff2	35544.1	62977.1	6804	1279	1938	PGP9.5_PNI	PASSED	remove	No	8033268 | 005 | Full ROI	28.7651	1.4053	31.5757	5819	27.4894
1938|008|FullROI	slide_1938	8033268	008	FullROI	1938 | 008 | FullROI	FALSE	FALSE	FALSE	FALSE	NA	37281.5	176	24542	44411	5311476	5055528	217286	5237226	5237226	95.702	VH01008:20:AAANNKJHV	0.9891	0.9891	DRAGEN_GeoMx_3.8.4-96	HWTA21004	PNI	bdd964ba-6cfe-4fa6-b0a5-cbfbeee72756	393d0d73-32d1-423b-9a02-e532dfc10be4	35544.1	62977.1	6804	1279	1938	PGP9.5_PNI	PASSED	keep	1938|008|FullROI	8033268 | 008 | Full ROI	10.1096	1.6705	13.4507	3881	9.66933
1938|010|FullROI	slide_1938	8033268	010	FullROI	1938 | 010 | FullROI	FALSE	FALSE	FALSE	FALSE	NA	16326	104	21459	56990	2450788	2331005	74998	2416307	2416307	96.7826	VH01008:20:AAANNKJHV	0.9887	0.9888	DRAGEN_GeoMx_3.8.4-96	HWTA21004	PNI	7f965dd5-4fe3-45b2-9ce8-c8fe7297df41	e57ba0a9-0187-4805-8162-eb161989cfd8	35544.1	62977.1	6804	1279	1938	PGP9.5_PNI	PASSED	keep	No	8033268 | 010 | Full ROI	3.4207	2.0793	7.5793	1184	3.12233
1938|012|FullROI	slide_1938	8033268	012	FullROI	1938 | 012 | FullROI	FALSE	FALSE	FALSE	FALSE	NA	90712	483	20272	45574	9937225	9454846	241085	9793980	9793980	97.4501	VH01008:20:AAANNKJHV	0.9887	0.9888	DRAGEN_GeoMx_3.8.4-96	HWTA21004	PNI	5ed71866-c5a2-42c3-a0a7-bc0ae02a1142	58bc1283-724b-44ff-b126-773d1bc555a5	35544.1	62977.1	6804	1279	1938	PGP9.5_PNI	PASSED	keep	1938|012|FullROI	8033268 | 012 | Full ROI	11.7496	1.5263	14.8021	4588	11.094
1938|014|FullROI	slide_1938	8033268	014	FullROI	1938 | 014 | FullROI	FALSE	FALSE	FALSE	FALSE	NA	23520.6	135	26357	44378	4926508	4682647	120711	4854328	4854328	97.4222	VH01008:20:AAANNKJHV	0.9891	0.9892	DRAGEN_GeoMx_3.8.4-96	HWTA21004	PNI	e08d1f6d-ba12-4677-81d0-140bf7b5754c	1d95bc76-8970-49a6-96c1-a398bc0c5203	35544.1	62977.1	6804	1279	1938	PGP9.5_PNI	PASSED	keep	1938|014|FullROI	8033268 | 014 | Full ROI	5.0864	1.7916	8.6695	3086	5.12331
1942|001|PanCK	slide_1942	8033219	001	PanCK	1942 | 001 | PanCK	FALSE	TRUE	FALSE	FALSE	NA	72550	617	38696.9	24270.4	41742213	39636741	1153884	41110015	41110015	97.0889	VH01008:20:AAANNKJHV	0.9889	0.9891	DRAGEN_GeoMx_3.8.4-96	HWTA21004	nonPNI	0e26fbc6-efe2-41de-b7b6-947879c88f75	7a0a7df3-7d9e-4e34-b81d-8bb963d4595b	35526.3	62900.9	6813	1317	1942	PanCK_nonPNI	PASSED	keep	1942|001|PanCK	8033219 | 001 | PanCK	29.6919	1.3486	32.3891	13408	44.983
1942|002|PanCK	slide_1942	8033219	002	PanCK	1942 | 002 | PanCK	FALSE	TRUE	FALSE	FALSE	NA	105681	923	40129.1	27177.2	26473987	25198912	624045	26111084	26111084	97.5235	VH01008:20:AAANNKJHV	0.9891	0.9895	DRAGEN_GeoMx_3.8.4-96	HWTA21004	nonPNI	6c736561-1203-4c24-905e-a652e1d3c6fa	674f35d6-2c61-4e9d-84b5-9307dc6565c3	35526.3	62900.9	6813	1317	1942	PanCK_nonPNI	PASSED	removed large AOI	No	8033219 | 002 | PanCK	19.086	1.3672	21.8204	11617	25.6868
1942|003|PanCK	slide_1942	8033219	003	PanCK	1942 | 003 | PanCK	FALSE	TRUE	FALSE	FALSE	NA	114869	1241	40766.2	24822.6	27902226	26558167	729865	27511000	27511000	97.2518	VH01008:20:AAANNKJHV	0.9889	0.989	DRAGEN_GeoMx_3.8.4-96	HWTA21004	nonPNI	a71f8553-e49d-45f2-b0b9-2f033fba5642	6b4d74fa-91ba-42fa-911b-f5ba72db4112	35526.3	62900.9	6813	1317	1942	PanCK_nonPNI	PASSED	removed large AOI	No	8033219 | 003 | PanCK	19.3157	1.3773	22.0704	12273	28.8787
1942|004|PanCK	slide_1942	8033219	004	PanCK	1942 | 004 | PanCK	FALSE	TRUE	FALSE	FALSE	NA	64951.8	584	16231.9	59392.7	24334791	23135562	617390	23976697	23976697	97.3314	VH01008:20:AAANNKJHV	0.9894	0.989	DRAGEN_GeoMx_3.8.4-96	HWTA21004	PNI	e4013d35-8cd4-4e86-a8ef-124b47d5729a	f17755b2-cf3e-4a6f-b9f6-2d9988e09275	35526.3	62900.9	6813	1317	1942	PanCK_PNI	PASSED	keep	1942|004|PanCK	8033219 | 004 | PanCK	18.2915	1.4024	21.0963	10879	24.8705
1942|005|PanCK	slide_1942	8033219	005	PanCK	1942 | 005 | PanCK	FALSE	TRUE	FALSE	FALSE	NA	71795.9	693	18534.2	60633	21023631	20011635	505508	20727768	20727768	97.4739	VH01008:20:AAANNKJHV	0.9887	0.9887	DRAGEN_GeoMx_3.8.4-96	HWTA21004	PNI	21df5195-2050-4e98-a9b3-ac30ebd15c87	131e15b2-b28c-4fc1-ad9e-b5cc2b5a7866	35526.3	62900.9	6813	1317	1942	PanCK_PNI	PASSED	keep	1942|005|PanCK	8033219 | 005 | PanCK	15.5329	1.3802	18.2932	10833	21.0186
1942|011|PanCK	slide_1942	8033219	011	PanCK	1942 | 011 | PanCK	FALSE	TRUE	FALSE	FALSE	NA	23882	207	26867.3	57050.7	6244272	5945941	204873	6154983	6154983	96.5544	VH01008:20:AAANNKJHV	0.9888	0.989	DRAGEN_GeoMx_3.8.4-96	HWTA21004	PNI	0dea817b-361f-438e-a0b8-ce95f68b0869	426e29ea-234d-45af-adf3-ee91d7d1c623	35526.3	62900.9	6813	1317	1942	PanCK_PNI	PASSED	keep	1942|011|PanCK	8033219 | 011 | PanCK	7.1054	1.5399	10.1852	6203	8.6117
1942|012|PanCK	slide_1942	8033219	012	PanCK	1942 | 012 | PanCK	FALSE	TRUE	FALSE	FALSE	NA	47803.3	399	30002.1	56772.3	19510355	18556166	562999	19223585	19223585	96.966	VH01008:20:AAANNKJHV	0.9888	0.9889	DRAGEN_GeoMx_3.8.4-96	HWTA21004	PNI	48b6f98f-2591-4777-a6de-85f65a0ddd03	61c4f907-6881-46d7-8cec-0696855e5c20	35526.3	62900.9	6813	1317	1942	PanCK_PNI	PASSED	keep	1942|012|PanCK	8033219 | 012 | PanCK	20.7218	1.3924	23.5066	9844	24.7807
1942|006|FullROI	slide_1942	8033219	006	FullROI	1942 | 006 | FullROI	FALSE	FALSE	FALSE	FALSE	NA	167242	615	12611	22354	12965332	12329952	504073	12777000	12777000	95.9118	VH01008:20:AAANNKJHV	0.9878	0.9901	DRAGEN_GeoMx_3.8.4-96	HWTA21004	nonPNI	def41e53-fa07-487d-9607-3c9a233ddf02	ef2a6f0d-e2c1-4a0d-98bb-db7ddccd7aed	35526.3	62900.9	6813	1317	1942	PGP9.5_nonPNI	PASSED	keep	1942|006|FullROI	8033219 | 006 | Full ROI	22.2872	1.3634	25.014	8418	24.3899
1942|007|FullROI	slide_1942	8033219	007	FullROI	1942 | 007 | FullROI	FALSE	FALSE	FALSE	FALSE	NA	48391	197	15485	26074	11269582	10724500	243059	11111434	11111434	97.7336	VH01008:20:AAANNKJHV	0.9889	0.9894	DRAGEN_GeoMx_3.8.4-96	HWTA21004	nonPNI	0923de16-e8ca-4715-b201-82773b958c47	09f7a7e4-5c55-4249-842c-560e3ceaa24a	35526.3	62900.9	6813	1317	1942	PGP9.5_nonPNI	PASSED	keep	1942|007|FullROI	8033219 | 007 | Full ROI	10.7443	1.4863	13.7168	6255	11.3085
1942|008|FullROI	slide_1942	8033219	008	FullROI	1942 | 008 | FullROI	FALSE	FALSE	FALSE	FALSE	NA	15660	67	14902	27510	1844636	1761381	49242	1819019	1819019	97.2044	VH01008:20:AAANNKJHV	0.9889	0.989	DRAGEN_GeoMx_3.8.4-96	HWTA21004	nonPNI	0b173711-5a40-4a5b-887e-84a2aa2c21d3	e9d470a9-72bd-4202-a614-c950e77e6afe	35526.3	62900.9	6813	1317	1942	PGP9.5_nonPNI	FAILED QC	<100 nuclei	No	8033219 | 008 | Full ROI	2.1972	1.8192	5.8356	1047	2.20833
1942|009|PGP9.5	slide_1942	8033219	009	PGP9.5	1942 | 009 | PGP9.5	FALSE	FALSE	TRUE	FALSE	NA	37643.4	129	14678	34427	4667128	4276511	97311	4605730	4605730	97.7245	VH01008:20:AAANNKJHV	0.9891	0.9893	DRAGEN_GeoMx_3.8.4-96	HWTA21004	nonPNI	06080a6c-3a0a-4fb8-8590-119ae1c58d0a	202d3d44-f09a-4b03-8f17-ca491e4fed37	35526.3	62900.9	6813	1317	1942	PGP9.5_nonPNI	PASSED	maybe	No	8033219 | 009 | PGP9.5	3.924	1.8501	7.6243	2740	11.1364
1942|010|FullROI	slide_1942	8033219	010	FullROI	1942 | 010 | FullROI	FALSE	FALSE	FALSE	FALSE	NA	46548.2	197	7352.3	51012.4	6843045	6510533	174242	6741749	6741749	97.3237	VH01008:20:AAANNKJHV	0.9895	0.9894	DRAGEN_GeoMx_3.8.4-96	HWTA21004	nonPNI	d3e22c37-7bd2-4bca-8059-5a03ccb376ae	18587e1e-1678-4c7e-99b3-4271cda8680a	35526.3	62900.9	6813	1317	1942	PGP9.5_nonPNI	PASSED	check_odd	1942|010|FullROI	8033219 | 010 | Full ROI	7.4756	1.5887	10.653	5157	8.00168
1942|004|PGP9.5	slide_1942	8033219	004	PGP9.5	1942 | 004 | PGP9.5	FALSE	FALSE	TRUE	FALSE	NA	44047.2	264	16231.9	59392.7	4157069	3954532	109573	4094912	4094912	97.2292	VH01008:20:AAANNKJHV	0.9889	0.9892	DRAGEN_GeoMx_3.8.4-96	HWTA21004	PNI	e4013d35-8cd4-4e86-a8ef-124b47d5729a	a335347e-f0ab-4fc1-a223-bfd42a38432b	35526.3	62900.9	6813	1317	1942	PGP9.5_PNI	FAILED QC	remove_check	No	8033219 | 004 | PGP9.5	4.2945	1.7024	7.6994	3564	12.5456
1942|005|PGP9.5	slide_1942	8033219	005	PGP9.5	1942 | 005 | PGP9.5	FALSE	FALSE	TRUE	FALSE	NA	39128.1	197	18534.2	60633	3623388	3455079	108382	3570646	3570646	96.8631	VH01008:20:AAANNKJHV	0.9887	0.9887	DRAGEN_GeoMx_3.8.4-96	HWTA21004	PNI	21df5195-2050-4e98-a9b3-ac30ebd15c87	efe55152-cb29-4995-858b-3c0014842bf0	35526.3	62900.9	6813	1317	1942	PGP9.5_PNI	FAILED QC	check_odd	No	8033219 | 005 | PGP9.5	3.9051	1.9307	7.7666	3210	45.0989
1942|011|PGP9.5	slide_1942	8033219	011	PGP9.5	1942 | 011 | PGP9.5	FALSE	FALSE	TRUE	FALSE	NA	5467.69	38	26867.3	57050.7	381128	363587	10229	376607	376607	97.1866	VH01008:20:AAANNKJHV	0.9891	0.9891	DRAGEN_GeoMx_3.8.4-96	HWTA21004	PNI	0dea817b-361f-438e-a0b8-ce95f68b0869	a43b54d1-1cc2-4dd2-82ae-1f4672ac52d3	35526.3	62900.9	6813	1317	1942	PGP9.5_PNI	PASSED	<100 nuclei	No	8033219 | 011 | PGP9.5	1.0817	1.2731	3.628	95	24.2412
1942|012|PGP9.5	slide_1942	8033219	012	PGP9.5	1942 | 012 | PGP9.5	FALSE	FALSE	TRUE	FALSE	NA	22408.6	129	30002.1	56772.3	3272273	3120529	88626	3226066	3226066	97.1599	VH01008:20:AAANNKJHV	0.989	0.9891	DRAGEN_GeoMx_3.8.4-96	HWTA21004	PNI	48b6f98f-2591-4777-a6de-85f65a0ddd03	a0a04e95-eeb4-481e-9bb9-7b07c03be9c4	35526.3	62900.9	6813	1317	1942	PGP9.5_PNI	FAILED QC	remove	No	8033219 | 012 | PGP9.5	3.5091	1.7955	7.1001	1925	5.40853
1944|005|PanCK	slide_1944	8033231(1944)	005	PanCK	1944 | 005 | PanCK	FALSE	True	False	FALSE	NA	76873.6	392	25106.8	36433.3	7086875	6731190	535486	6981396	6981396	92.2015	VH01008:25:AACC5JKHV	0.9874	0.9875	DRAGEN_GeoMx_3.8.4-96	HW0070923	nonPNI	788403de-6aa3-4043-820b-0e342d1424ec	c134401e-245f-4528-a8b6-11f04897a389	33748.7	70393.4	7701	5763	1944	PanCK_nonPNI	PASSED	keep	1944|005|PanCK		14.8623	1.51	17.8823	8953	18.1748
1944|006|PanCK	slide_1944	8033231(1944)	006	PanCK	1944 | 006 | PanCK	FALSE	True	False	FALSE	NA	81506.2	571	19613.9	35639.5	8359288	7949661	659521	8235535	8235535	91.8732	VH01008:25:AACC5JKHV	0.987	0.9874	DRAGEN_GeoMx_3.8.4-96	HW0070923	nonPNI	2b16cb11-de7f-4c23-9d1d-0ace27f2954b	22bbdce6-a2d3-4e8f-8a1b-58b81a8502e7	33748.7	70393.4	7701	5763	1944	PanCK_nonPNI	PASSED	keep	1944|006|PanCK		18.1457	1.4436	21.0328	9047	22.4781
1944|002|PanCK	slide_1944	8033231(1944)	002	PanCK	1944 | 002 | PanCK	FALSE	True	False	FALSE	NA	48939.4	312	30648.1	22946.8	3685873	3511133	290812	3633312	3633312	91.8809	VH01008:25:AACC5JKHV	0.987	0.9874	DRAGEN_GeoMx_3.8.4-96	HW0070923	PNI	ebacaaec-8a58-4cc6-9bf5-d92563a48759	e7acd4a0-2f20-4a6a-a3df-001fd4442ad2	33748.7	70393.4	7701	5763	1944	PanCK_PNI	PASSED	keep	1944|002|PanCK		6.7281	1.7105	10.149	6395	8.83107
1944|007|PanCK	slide_1944	8033231(1944)	007	PanCK	1944 | 007 | PanCK	FALSE	True	False	FALSE	NA	45244.9	337	36095	71227	4664408	4431111	463518	4593778	4593778	89.7581	VH01008:25:AACC5JKHV	0.9858	0.9883	DRAGEN_GeoMx_3.8.4-96	HW0070923	PNI	f3aab922-ab67-4f93-8ad7-ada3d02eb375	19d7fb8e-e852-4d76-939f-bb93b74c61bf	33748.7	70393.4	7701	5763	1944	PanCK_PNI	PASSED	keep	1944|007|PanCK		11.6563	1.5505	14.7573	9426	15.3197
1944|008|PanCK	slide_1944	8033231(1944)	008	PanCK	1944 | 008 | PanCK	FALSE	True	False	FALSE	NA	27269.7	179	36731	69478	4781265	4561067	306529	4715370	4715370	93.405	VH01008:25:AACC5JKHV	0.9875	0.9878	DRAGEN_GeoMx_3.8.4-96	HW0070923	PNI	e396facd-761c-415a-a934-12c94ce197fb	60cda4a4-9f3e-4107-a9b5-f7fe3c52ed15	33748.7	70393.4	7701	5763	1944	PanCK_PNI	PASSED	keep	No		7.6315	1.7626	11.1566	7127	10.3293
1944|011|PanCK	slide_1944	8033231(1944)	011	PanCK	1944 | 011 | PanCK	FALSE	True	False	FALSE	NA	31480.8	201	27150	18685	2429241	2312343	193705	2393753	2393753	91.7951	VH01008:25:AACC5JKHV	0.9871	0.9873	DRAGEN_GeoMx_3.8.4-96	HW0070923	PNI	3ac24d16-e7b5-4fc9-950f-9f4f52ccd5ff	787fe1ff-8bfb-40c8-bf25-6ed8a6555983	33748.7	70393.4	7701	5763	1944	PanCK_PNI	PASSED	keep	1944|011|PanCK		4.1689	1.9025	7.9739	5531	5.51926
1944|003|PGP9.5	8033231(1944)	8033231(1944)	003	PGP9.5	1944 | 003 | PGP9.5	FALSE	False	True	FALSE	NA	17666.6	105	29710	14849	169713	161788	16625	167184	167184	89.9403	VH01008:25:AACC5JKHV	0.9867	0.9875	DRAGEN_GeoMx_3.8.4-96	HW0070923	nonPNI	34d5883a-71d6-4bae-98fb-1c5157561e1d	2de0a66c-3fcf-4ca9-aa15-e9e130bd3753	33748.7	70393.4	7701	5763	1944	PGP9.5_nonPNI	PASSED (low nuclei)	keep	No		1.2071	1.4532	4.1134	116	1.18976
1944|004|PGP9.5	8033231(1944)	8033231(1944)	004	PGP9.5	1944 | 004 | PGP9.5	FALSE	False	True	FALSE	NA	65188.1	46	21396	14362	919900	874931	64017	906462	906462	92.8215	VH01008:25:AACC5JKHV	0.9869	0.9873	DRAGEN_GeoMx_3.8.4-96	HW0070923	nonPNI	2702fc42-2ded-40b7-92f1-93f397a996d5	e05a5bb2-2ba8-4724-9b99-95bca36fe1f0	33748.7	70393.4	7701	5763	1944	PGP9.5_nonPNI	PASSED	keep	No		2.3814	1.8863	6.1541	875	2.48774
1944|009|PGP9.5	8033231(1944)	8033231(1944)	009	PGP9.5	1944 | 009 | PGP9.5	FALSE	False	True	FALSE	NA	67219.5	203	22282	18949	2019473	1918231	126663	1988379	1988379	93.5402	VH01008:25:AACC5JKHV	0.9867	0.987	DRAGEN_GeoMx_3.8.4-96	HW0070923	nonPNI	4ecaeaa3-2c2d-406a-a166-89e8cbc36be0	b5258917-ad01-42c7-a7c8-78c5051def9e	33748.7	70393.4	7701	5763	1944	PGP9.5_nonPNI	PASSED	keep	No		4.5432	1.8289	8.2009	2644	4.81194
1944|001|PGP9.5	8033231(1944)	8033231(1944)	001	PGP9.5	1944 | 001 | PGP9.5	FALSE	False	True	FALSE	NA	91583.9	378	27033.8	18016.4	3193556	3040054	278117	3147683	3147683	91.0304	VH01008:25:AACC5JKHV	0.9873	0.987	DRAGEN_GeoMx_3.8.4-96	HW0070923	PNI	35e86c08-7123-4007-9fdd-a84788af605f	fc73272b-f3a9-4578-9965-d1de3f7d2629	33748.7	70393.4	7701	5763	1944	PGP9.5_PNI	PASSED	keep	No		8.6447	1.6149	11.8746	6662	9.83742
1944|002|PGP9.5	8033231(1944)	8033231(1944)	002	PGP9.5	1944 | 002 | PGP9.5	FALSE	False	True	FALSE	NA	22231.5	107	30648.1	22946.8	827159	785553	65114	814948	814948	91.8834	VH01008:25:AACC5JKHV	0.987	0.9876	DRAGEN_GeoMx_3.8.4-96	HW0070923	PNI	ebacaaec-8a58-4cc6-9bf5-d92563a48759	14576ae7-b86f-4341-b630-2fd64a063114	33748.7	70393.4	7701	5763	1944	PGP9.5_PNI	PASSED (low nuclei)	keep	No		1.9029	1.8797	5.6623	1405	2.18854
1944|008|PGP9.5	8033231(1944)	8033231(1944)	008	PGP9.5	1944 | 008 | PGP9.5	FALSE	False	True	FALSE	NA	17240.9	63	36731	69478	1156549	1100885	71633	1139578	1139578	93.6149	VH01008:25:AACC5JKHV	0.9878	0.9875	DRAGEN_GeoMx_3.8.4-96	HW0070923	PNI	e396facd-761c-415a-a934-12c94ce197fb	2a2544c3-e821-48b9-8e02-d08407a682e5	33748.7	70393.4	7701	5763	1944	PGP9.5_PNI	PASSED	keep	No		2.551	1.7882	6.1274	1404	2.72286
1944|010|PGP9.5	8033231(1944)	8033231(1944)	010	PGP9.5	1944| 010 | PGP9.5	FALSE	False	True	FALSE	NA	63067.3	299	28169	18145	3639723	3464952	226528	3589072	3589072	93.5906	VH01008:25:AACC5JKHV	0.9874	0.9874	DRAGEN_GeoMx_3.8.4-96	HW0070923	PNI	4d30c7ad-a7f1-41fd-9136-d9293db85d34	6209cb1a-1ef8-4114-8a1f-9dc229a48c3b	33748.7	70393.4	7701	5763	1944	PGP9.5_PNI	PASSED	keep	No		6.7523	1.5943	9.9409	6891	8.11892
1944|012|FullROI	Slide_1944	8033231(1944)	012	Full ROI	1944 | 012 | Full ROI	FALSE	False	False	FALSE	NA	31388.9	181	36040	70944	1146421	1088557	94944	1129346	1129346	91.4526	VH01008:25:AACC5JKHV	0.9873	0.9872	DRAGEN_GeoMx_3.8.4-96	HW0070923	PNI	06738251-4f7a-474e-9b7e-20f84395a8f2	fbfb00d3-6451-4c4c-b8f8-868ee01c5891	33748.7	70393.4	7701	5763	1944	PGP9.5_PNI	PASSED	keep	1944|012|FullROI		3.0906	1.904	6.8986	2946	3.60083
1993|005|PanCK	slide_1993	Collection 1	005	PanCK	1993 | 005 | PanCK	FALSE	TRUE	FALSE	FALSE	NA	80145.4	736	30746.9	72102.6	4637539	4487144	1822330	4590459	4590459	60.1428	VH01008:1:AAAN5WVHV;	0.9864	0.9864	DRAGEN_GeoMx_3.8.4-96	HWTA21003	nonPNI	08a45f7d-4e42-4a00-827a-3c8ff48b3155	ec9bdc83-70f0-4810-a649-6107d3d0ba58	31864	77811.6	452	2054	1993	PanCK_nonPNI	PASSED	Different incubation protocol	No	Collection 1 | 005 | PanCK	36.2104	1.7871	39.7845	10483	47.8987
1993|006|PanCK	slide_1993	Collection 1	006	PanCK	1993 | 006 | PanCK	FALSE	TRUE	FALSE	FALSE	NA	88553.7	713	26139	62639	5592306	5409604	2221337	5534407	5534407	59.6487	VH01008:1:AAAN5WVHV;	0.9863	0.9863	DRAGEN_GeoMx_3.8.4-96	HWTA21003	nonPNI	4f939835-9720-4983-8074-f8e54941aa49	093b60e5-7235-4f66-bd60-e71166462806	31864	77811.6	452	2054	1993	PanCK_nonPNI	PASSED	Different incubation protocol	No	Collection 1 | 006 | PanCK	43.1393	1.7863	46.7119	10686	58.0059
1993|001|PanCK	slide_1993	Collection 1	001	PanCK	1993 | 001 | PanCK	FALSE	TRUE	FALSE	FALSE	NA	25657.1	229	9723	47336	2046984	1979156	676430	2025542	2025542	66.5307	VH01008:1:AAAN5WVHV;	0.9863	0.9863	DRAGEN_GeoMx_3.8.4-96	HWTA21003	PNI	5a818e13-878b-424e-a42d-ab3a589b3c08	d258e7f6-8586-44c4-8569-2173810b3832	31864	77811.6	452	2054	1993	PanCK_PNI	PASSED	Different incubation protocol	No	Collection 1 | 001 | PanCK	11.5425	1.9929	15.5282	8403	16.0203
1993|004|PanCK	slide_1993	Collection 1	004	PanCK	1993 | 004 | PanCK	FALSE	TRUE	FALSE	FALSE	NA	43403.4	308	6540	61142	2111732	2044461	845311	2089948	2089948	59.4088	VH01008:1:AAAN5WVHV;	0.9863	0.9863	DRAGEN_GeoMx_3.8.4-96	HWTA21003	PNI	84553ea9-8a93-47bd-b48b-a01c46662d6b	12cfc4f8-94ab-48f6-bd86-84c195f3268b	31864	77811.6	452	2054	1993	PanCK_PNI	PASSED	Different incubation protocol	No	Collection 1 | 004 | PanCK	15.7569	1.8643	19.4856	8753	20.8705
1993|010|PanCK	slide_1993	Collection 1	010	PanCK	1993 | 010 | PanCK	FALSE	TRUE	FALSE	FALSE	NA	30012	262	9070	49000	1875806	1813127	693135	1855031	1855031	62.5205	VH01008:1:AAAN5WVHV;	0.9858	0.9858	DRAGEN_GeoMx_3.8.4-96	HWTA21003	PNI	194e8ed1-99d8-44f7-bd4e-81814fa2663e	ff15f856-5601-4501-ade5-5d95e4c66ac0	31864	77811.6	452	2054	1993	PanCK_PNI	PASSED	Different incubation protocol	No	Collection 1 | 010 | PanCK	12.0409	1.9189	15.8787	9141	16.8131
1993|008|PGP9.5	slide_1993	Collection 1	008	PGP9.5	1993 | 008 | PGP9.5	FALSE	FALSE	TRUE	FALSE	NA	45792.2	323	27429	49368	1110414	1074717	351727	1098719	1098719	67.942	VH01008:1:AAAN5WVHV;	0.9863	0.9863	DRAGEN_GeoMx_3.8.4-96	HWTA21003	nonPNI	edcb7a1c-dc56-423a-af4a-3ab12138c1a7	2c5baca6-e2d3-4325-b714-da62e18838ef	31864	77811.6	452	2054	1993	PGP9.5_nonPNI	PASSED	Different incubation protocol	No	Collection 1 | 008 | PGP9.5	8.5066	1.7307	11.9681	8125	11.1364
1993|001|PGP9.5	slide_1993	Collection 1	001	PGP9.5	1993 | 001 | PGP9.5	FALSE	FALSE	TRUE	FALSE	NA	44088.9	165	9723	47336	1379241	1334540	428428	1364992	1364992	68.5804	VH01008:1:AAAN5WVHV;	0.9863	0.9863	DRAGEN_GeoMx_3.8.4-96	HWTA21003	PNI	5a818e13-878b-424e-a42d-ab3a589b3c08	ff5e3dca-c487-4852-8c51-fb2dc8ae1d1d	31864	77811.6	452	2054	1993	PGP9.5_PNI	PASSED	Different incubation protocol	No	Collection 1 | 001 | PGP9.5	10.4017	1.7505	13.9027	7237	12.5456
1993|004|PGP9.5	slide_1993	Collection 1	006	PGP9.5	1993 | 004 | PGP9.5	FALSE	FALSE	TRUE	FALSE	NA	140350	632	6540	61142	4587860	4436949	1550030	4539853	4539853	65.7859	VH01008:1:AAAN5WVHV;	0.9864	0.9864	DRAGEN_GeoMx_3.8.4-96	HWTA21003	PNI	84553ea9-8a93-47bd-b48b-a01c46662d6b	bdc1197a-3f79-49f3-94ce-652cfdbb2ed3	31864	77811.6	452	2054	1993	PGP9.5_PNI	PASSED	Different incubation protocol	No	Collection 1 | 004 | PGP9.5	38.246	1.5516	41.3492	9068	45.0989
1993|010|PGP9.5	slide_1993	Collection 1	010	PGP9.5	1993 | 010 | PGP9.5	FALSE	FALSE	TRUE	FALSE	NA	128706	498	9070	49000	1744279	1688625	797124	1726698	1726698	53.5238	VH01008:1:AAAN5WVHV;	0.9867	0.9867	DRAGEN_GeoMx_3.8.4-96	HWTA21003	PNI	194e8ed1-99d8-44f7-bd4e-81814fa2663e	78966a71-734f-4a3b-a40d-47176757fc63	31864	77811.6	452	2054	1993	PGP9.5_PNI	PASSED	Different incubation protocol	No	Collection 1 | 010 | PGP9.5	19.9557	1.7331	23.422	8606	24.2412
2343|002|PanCK	slide_2343	2343	002	PanCK	2343 | 002 | PanCK	FALSE	TRUE	FALSE	FALSE	NA	61756.5	424	37019	37666	13335120	12932290	673992	13218101	13218101	94.7883	VH01008:10:AAALH7NHV	0.9902	0.9904	DRAGEN_GeoMx_3.8.4-96	HWTA21003	nonPNI	ab88b5ec-e506-4eea-bc03-1d1485503e91	c7a81df7-4156-4af6-a732-43b0b785f003	33583.7	57439	7784	4048	2343	PanCK_nonPNI	PASSED	keep	2343|002|PanCK	2343 | 002 | PanCK	13.4407	1.5798	16.6002	11021	19.8896
2343|003|PanCK	slide_2343	2343	003	PanCK	2343 | 003 | PanCK	FALSE	TRUE	FALSE	FALSE	NA	61629.6	438	36849	34887	13783841	13353908	652035	13663009	13663009	95.1173	VH01008:10:AAALH7NHV	0.9895	0.9908	DRAGEN_GeoMx_3.8.4-96	HWTA21003	nonPNI	5ff5db5d-7d94-4e53-a541-92d6582a7d4f	3c3794c3-e49e-4aa8-8dcc-d3b49677717b	33583.7	57439	7784	4048	2343	PanCK_nonPNI	PASSED	keep	2343|003|PanCK	2343 | 003 | PanCK	14.1781	1.5497	17.2776	11002	20.6682
2343|004|PanCK	slide_2343	2343	004	PanCK	2343 | 004 | PanCK	FALSE	TRUE	FALSE	FALSE	NA	69709.3	379	38214	32035	13648438	13226735	660806	13523338	13523338	95.004	VH01008:10:AAALH7NHV	0.9894	0.9905	DRAGEN_GeoMx_3.8.4-96	HWTA21003	nonPNI	36b2f79c-f213-447b-9842-13572c75c717	4431ebbe-8166-4ea8-828f-4e331ed9014e	33583.7	57439	7784	4048	2343	PanCK_nonPNI	PASSED	keep	2343|004|PanCK	2343 | 004 | PanCK	17.561	1.4712	20.5035	9895	22.2417
2343|001|PanCK	slide_2343	2343	001	PanCK	2343 | 001 | PanCK	FALSE	TRUE	FALSE	FALSE	NA	94610	691	32769	37272	16393254	15887126	810184	16244008	16244008	94.9004	VH01008:10:AAALH7NHV	0.9892	0.9902	DRAGEN_GeoMx_3.8.4-96	HWTA21003	PNI	60e18408-1cae-45cd-9278-82eb120a3e72	8858cf4a-db2d-4fcf-94e1-ebe2fa18c5b8	33583.7	57439	7784	4048	2343	PanCK_PNI	PASSED	keep	2343|001|PanCK	2343 | 001 | PanCK	14.8019	1.568	17.9379	11665	23.1544
2343|008|PanCK	slide_2343	2343	008	PanCK	2343 | 008 | PanCK	FALSE	TRUE	FALSE	FALSE	NA	90049.1	680	36557	30754	14873007	14419185	990176	14737946	14737946	93.1329	VH01008:10:AAALH7NHV	0.9899	0.9902	DRAGEN_GeoMx_3.8.4-96	HWTA21003	PNI	95d573fa-d9bd-429f-acfd-0ceed08c6ff1	cdc2c2fc-d6db-4247-8837-0862849c77a3	33583.7	57439	7784	4048	2343	PanCK_PNI	PASSED	keep	2343|008|PanCK	2343 | 008 | PanCK	23.7658	1.4108	26.5874	11407	31.9721
2343|005|FullROI	slide_2343	2343	005	FullROI	2343 | 005 | FullROI	FALSE	FALSE	TRUE	FALSE	NA	221422	1151	30180	52492	13982840	13552132	659954	13852685	13852685	95.1303	VH01008:10:AAALH7NHV	0.9897	0.991	DRAGEN_GeoMx_3.8.4-96	HWTA21003	nonPNI	78d23f6d-e5f4-43fd-9d97-2cc4c3a270b2	6cc1e38a-2f52-4807-8cf7-312114c187d4	33583.7	57439	7784	4048	2343	PGP9.5_nonPNI	PASSED	keep	2343 | 005 | FullROI	2343 | 005 | Full ROI	27.15	1.3484	29.8468	9146	29.3883
2343|006|FullROI	slide_2343	2343	006	FullROI	2343 | 006 | FullROI	FALSE	FALSE	TRUE	FALSE	NA	207856	1012	29755	51855	11177481	10840979	511519	11075073	11075073	95.2816	VH01008:10:AAALH7NHV	0.9898	0.9904	DRAGEN_GeoMx_3.8.4-96	HWTA21003	nonPNI	3b7530e5-89f7-41c9-9171-6c523e60cf85	f625d644-5c7a-437e-8e76-42599b25956c	33583.7	57439	7784	4048	2343	PGP9.5_nonPNI	PASSED	keep	2343 | 006 | FullROI	2343 | 006 | Full ROI	20.1351	1.416	22.9671	9158	22.3529
2343|001|PGP9.5	slide_2343	2343	001	PGP9.5	2343 | 001 | PGP9.5	FALSE	FALSE	TRUE	FALSE	NA	82069.6	888	32769	37272	5165816	5007553	319676	5118816	5118816	93.6161	VH01008:10:AAALH7NHV	0.9894	0.9901	DRAGEN_GeoMx_3.8.4-96	HWTA21003	PNI	60e18408-1cae-45cd-9278-82eb120a3e72	440d3e29-a424-4e38-b51f-7ca8b42935d1	33583.7	57439	7784	4048	2343	PGP9.5_PNI	PASSED	removed large AOI	No	2343 | 001 | PGP9.5	7.8717	1.6329	11.1376	8259	11.0921
2920|007|PanCK	slide_2920	2920	007	PanCK	2920 | 007 | PanCK	FALSE	TRUE	FALSE	FALSE	NA	74917.1	731	22662	32892	3945566	3821412	197390	3907482	3907482	94.8346	VH01008:10:AAALH7NHV	0.9902	0.9904	DRAGEN_GeoMx_3.8.4-96	HWTA21003	nonPNI	da041bfd-22a7-4d6a-be47-b2a8c8180223	d0259290-0e13-40e9-b07f-7631e6337ecb	35360.6	50083.7	6895	7726	2920	PanCK_nonPNI	PASSED	> 700 nuclei	No	2920 | 007 | PanCK	1.4849	1.6521	4.7891	7569	3.7871
2920|008|PanCK	slide_2920	2920	008	PanCK	2920 | 008 | PanCK	FALSE	TRUE	FALSE	FALSE	NA	41475.1	414	19754	32496	1787192	1714121	99163	1768510	1768510	94.2149	VH01008:10:AAALH7NHV	0.9897	0.9907	DRAGEN_GeoMx_3.8.4-96	HWTA21003	nonPNI	36c2cfb4-1519-44f1-aa74-743fa6bcf4f8	1001e94b-6f3b-402a-b53c-3e98f5d59c9f	35360.6	50083.7	6895	7726	2920	PanCK_nonPNI	PASSED	keep	2920|008|PanCK	2920 | 008 | PanCK	1.1536	1.4073	3.9682	5448	2.30034
2920|001|PanCK	slide_2920	2920	001	PanCK	2920 | 001 | PanCK	FALSE	TRUE	FALSE	FALSE	NA	53140.3	436	33073	41109	2456781	2380974	140730	2434465	2434465	94.0894	VH01008:10:AAALH7NHV	0.9899	0.9908	DRAGEN_GeoMx_3.8.4-96	HWTA21003	PNI	f4310d2c-3907-4029-9b95-032ae7907e1b	db3201a8-187c-4736-84c5-65638ac7a961	35360.6	50083.7	6895	7726	2920	PanCK_PNI	PASSED	keep	2920|001|PanCK	2920 | 001 | PanCK	1.1633	1.4564	4.0761	6059	2.96555
2920|002|PanCK	slide_2920	2920	002	PanCK	2920 | 002 | PanCK	FALSE	TRUE	FALSE	FALSE	NA	71015.8	690	31059	40000.7	3568068	3459968	197167	3536458	3536458	94.3015	VH01008:10:AAALH7NHV	0.9896	0.991	DRAGEN_GeoMx_3.8.4-96	HWTA21003	PNI	850900e3-13fc-499f-99e2-680afc334e70	a4ee3eee-87aa-4fa4-a1c0-3eefe53a72b8	35360.6	50083.7	6895	7726	2920	PanCK_PNI	PASSED	keep	2920|002|PanCK	2920 | 002 | PanCK	1.4227	1.6222	4.6671	7780	3.9163
2920|003|PanCK	slide_2920	2920	003	PanCK	2920 | 003 | PanCK	FALSE	TRUE	FALSE	FALSE	NA	30869.9	297	33840	39824	1319502	1279522	73075	1307249	1307249	94.2889	VH01008:10:AAALH7NHV	0.9898	0.9906	DRAGEN_GeoMx_3.8.4-96	HWTA21003	PNI	1ba6ca87-ffce-4a2d-9c72-1f06929fb80f	7129d2f6-b6ec-4d35-8537-5ce7706a7501	35360.6	50083.7	6895	7726	2920	PanCK_PNI	PASSED	keep	2920|003|PanCK	2920 | 003 | PanCK	1.0857	1.3143	3.7144	4265	1.94879
2920|004|PGP9.5	slide_2920	2920	004	PGP9.5	2920 | 004 | PGP9.5	FALSE	FALSE	TRUE	FALSE	NA	146535	728	29799.9	29856.4	1750152	1401287	112694	1733202	1733202	91.9578	VH01008:10:AAALH7NHV	0.9896	0.9905	DRAGEN_GeoMx_3.8.4-96	HWTA21003	nonPNI	37b0998a-22e4-4c95-b964-43541cacb549	83a4ff69-697b-475d-b62f-3fcf878357d3	35360.6	50083.7	6895	7726	2920	PGP9.5_nonPNI	PASSED	keep	No	2920 | 004 | Pgp9.5	2.8826	1.7979	6.4785	4657	4.2073
2920|005|PGP9.5	slide_2920	2920	005	PGP9.5	2920 | 005 | PGP9.5	FALSE	FALSE	TRUE	FALSE	NA	119823	551	32067.2	30446.6	968647	939466	56688	959479	959479	93.9659	VH01008:10:AAALH7NHV	0.9894	0.9903	DRAGEN_GeoMx_3.8.4-96	HWTA21003	nonPNI	9348c332-3c89-4245-996c-29976f40b0e0	abc1bae0-f472-41b0-9171-e9e17fb36d22	35360.6	50083.7	6895	7726	2920	PGP9.5_nonPNI	PASSED	keep	No	2920 | 005 | Pgp9.5	1.1479	1.3735	3.895	3383	1.82264
2920|006|PGP9.5	slide_2920	2920	006	PGP9.5	2920 | 006 | PGP9.5	FALSE	FALSE	TRUE	FALSE	NA	80089.4	396	33758.7	29195.6	905901	877425	45857	897701	897701	94.7737	VH01008:10:AAALH7NHV	0.9897	0.9904	DRAGEN_GeoMx_3.8.4-96	HWTA21003	nonPNI	0f3242e3-45b9-4017-9282-b6fb8037c510	9295f05d-6aff-43c1-a31c-e0941d17024a	35360.6	50083.7	6895	7726	2920	PGP9.5_nonPNI	PASSED	keep	No	2920 | 006 | Pgp9.5	1.1375	1.3938	3.925	2819	1.64037
2920|001|PGP9.5	slide_2920	2920	001	PGP9.5	2920 | 001 | PGP9.5	FALSE	FALSE	TRUE	FALSE	NA	100747	518	33073	41109	1346939	1304272	79869	1334536	1334536	93.8764	VH01008:10:AAALH7NHV	0.9898	0.9903	DRAGEN_GeoMx_3.8.4-96	HWTA21003	PNI	f4310d2c-3907-4029-9b95-032ae7907e1b	4a4e09f5-7b57-4d87-b13a-28227afcfd6a	35360.6	50083.7	6895	7726	2920	PGP9.5_PNI	PASSED	keep	No	2920 | 001 | Pgp9.5	1.285	1.5424	4.3698	3903	2.31176
2920|003|PGP9.5	slide_2920	2920	003	PGP9.5	2920 | 003 | PGP9.5	FALSE	FALSE	TRUE	FALSE	NA	202786	1161	33840	39824	874323	847936	128416	866653	866653	84.8555	VH01008:10:AAALH7NHV	0.9895	0.9907	DRAGEN_GeoMx_3.8.4-96	HWTA21003	PNI	1ba6ca87-ffce-4a2d-9c72-1f06929fb80f	edb792ff-0e95-4e7f-ac6c-262a5d88dfea	35360.6	50083.7	6895	7726	2920	PGP9.5_PNI	PASSED	keep	No	2920 | 003 | Pgp9.5	2.0897	1.7097	5.5092	5666	3.68193
3435|006|PanCK	slide_3435	3435	006	PanCK	3435 | 006 | PanCK	FALSE	TRUE	FALSE	FALSE	NA	40877.7	386	41619	34965	2758730	2673072	213663	2733784	2733784	92.0068	VH01008:10:AAALH7NHV	0.9901	0.9906	DRAGEN_GeoMx_3.8.4-96	HWTA21003	nonPNI	074f671f-e192-41f7-927a-920650f4746b	34f2e6f7-a9fc-427c-9c7d-b267093a2048	35502.6	61174	6824	2181	3435	PanCK_nonPNI	PASSED	keep	3435|006|PanCK	3435 | 006 | PanCK	2.6045	1.8265	6.2574	6736	5.06835
3435|015|PanCK	slide_3435	3435	015	PanCK	3435 | 015 | PanCK	FALSE	TRUE	FALSE	FALSE	NA	43066.1	323	39740	39370	3740622	3626389	206471	3706321	3706321	94.3064	VH01008:10:AAALH7NHV	0.9899	0.9905	DRAGEN_GeoMx_3.8.4-96	HWTA21003	nonPNI	d9c6f520-7121-41fe-a615-b958943ab9ed	9f60ae29-1f1a-4f76-a835-351588df71e9	35502.6	61174	6824	2181	3435	PanCK_nonPNI	PASSED	keep	3435|015|PanCK	3435 | 015 | PanCK	2.9731	1.9153	6.8036	7117	5.38253
3435|001|PanCK	slide_3435	3435	001	PanCK	3435 | 001 | PanCK	FALSE	TRUE	FALSE	FALSE	NA	127200	1195	29838	42455	6065620	5881047	410847	6010550	6010550	93.0141	VH01008:10:AAALH7NHV	0.9897	0.9902	DRAGEN_GeoMx_3.8.4-96	HWTA21003	PNI	294080a6-dc3f-4bd0-9e45-1290d260b775	e3011ae7-859f-42e9-ba15-4d08f32832ed	35502.6	61174	6824	2181	3435	PanCK_PNI	PASSED	removed large AOI	No	3435 | 001 | PanCK	4.731	1.8236	8.3781	10388	10.2185
3435|004|PanCK	slide_3435	3435	004	PanCK	3435 | 004 | PanCK	FALSE	TRUE	FALSE	FALSE	NA	89049.7	556	24109	53144	9559857	9264471	663849	9471940	9471940	92.8345	VH01008:10:AAALH7NHV	0.99	0.9905	DRAGEN_GeoMx_3.8.4-96	HWTA21003	PNI	f27342f7-5dfd-4887-bcd1-9587ddcf73fc	ff02e71c-831e-4d33-bf4a-91e683640bf1	35502.6	61174	6824	2181	3435	PanCK_PNI	PASSED	keep	3435|004|PanCK	3435 | 004 | PanCK	6.2742	1.9879	10.25	11680	15.7836
3435|005|PanCK	slide_3435	3435	005	PanCK	3435 | 005 | PanCK	FALSE	TRUE	FALSE	FALSE	NA	102763	644	20548	22947	4257215	4129666	287323	4220692	4220692	93.0425	VH01008:10:AAALH7NHV	0.9895	0.9908	DRAGEN_GeoMx_3.8.4-96	HWTA21003	PNI	6fd36ca3-9349-4ed2-8c25-e250675eecbd	cb48a6c1-a28f-4d5b-82f2-22a8e750bd22	35502.6	61174	6824	2181	3435	PanCK_PNI	PASSED	keep	3435|005|PanCK	3435 | 005 | PanCK	3.8963	1.7814	7.4591	7737	6.87357
3435|007|PanCK	slide_3435	3435	007	PanCK	3435 | 007 | PanCK	FALSE	TRUE	FALSE	FALSE	NA	48836	409	31744	42251	62	62	51	62	62	17.7419	VH01008:10:AAALH7NHV	0.9892	0.9839	DRAGEN_GeoMx_3.8.4-96	HWTA21003	PNI	90c37797-1f2f-49ce-91c3-0fc91455254c	c664121f-9c89-430a-b643-6272b8433800	35502.6	61174	6824	2181	3435	PanCK_PNI	PASSED	removed no reads	No	3435 | 007 | PanCK	1	1	3	0	1.00013
3435|008|PanCK	slide_3435	3435	008	PanCK	3435 | 008 | PanCK	FALSE	TRUE	FALSE	FALSE	NA	37436.3	345	24879	58377	5122073	4977895	307072	5073100	5073100	93.8313	VH01008:10:AAALH7NHV	0.9899	0.9905	DRAGEN_GeoMx_3.8.4-96	HWTA21003	PNI	7c69f528-aee4-4072-9a64-d33af0c92b11	0eb6cafa-68d3-47d3-b999-e0dad35d6db5	35502.6	61174	6824	2181	3435	PanCK_PNI	PASSED	keep	3435|008|PanCK	3435 | 008 | PanCK	8.1699	1.8422	11.8543	7727	10.5999
3435|011|PanCK	slide_3435	3435	011	PanCK	3435 | 011 | PanCK	FALSE	TRUE	FALSE	FALSE	NA	21388.2	342	26519	56561	2789576	2708726	165855	2766474	2766474	93.877	VH01008:10:AAALH7NHV	0.9896	0.9908	DRAGEN_GeoMx_3.8.4-96	HWTA21003	PNI	0982cd73-2a56-484f-8b5a-614b6e7108fc	79ecc80d-a998-4388-bd6d-1888fb36337b	35502.6	61174	6824	2181	3435	PanCK_PNI	PASSED	keep	3435|011|PanCK	3435 | 011 | PanCK	1.5939	1.7202	5.0343	6054	3.6092
3435|012|PanCK	slide_3435	3435	012	PanCK	3435 | 012 | PanCK	FALSE	TRUE	FALSE	FALSE	NA	47879.9	450	13720	51904	3314869	3207198	205035	3283662	3283662	93.607	VH01008:10:AAALH7NHV	0.9899	0.9904	DRAGEN_GeoMx_3.8.4-96	HWTA21003	PNI	50b05bdc-87f4-4eab-abe7-e3b9e723dd2e	00307d4e-6b7a-484d-978d-47ec665ed0d9	35502.6	61174	6824	2181	3435	PanCK_PNI	PASSED	keep	3435|012|PanCK	3435 | 012 | PanCK	1.9777	1.8566	5.6909	7439	4.62572
3435|013|PanCK	slide_3435	3435	013	PanCK	3435 | 013 | PanCK	FALSE	TRUE	FALSE	FALSE	NA	24968.8	285	12868	53271	1813518	1638594	110221	1796878	1796878	93.2734	VH01008:10:AAALH7NHV	0.9897	0.9909	DRAGEN_GeoMx_3.8.4-96	HWTA21003	PNI	370bf2b3-5a2a-45d5-ab36-b19d4851b044	536651bd-c65b-4b79-9f82-6bf0b78a2314	35502.6	61174	6824	2181	3435	PanCK_PNI	PASSED	keep	3435|013|PanCK	3435 | 013 | PanCK	1.3948	1.6335	4.6618	5259	2.77164
3435|002|PGP9.5	slide_3435	3435	002	PGP9.5	3435 | 002 | PGP9.5	FALSE	FALSE	TRUE	FALSE	NA	111014	528	31663	43692	2232448	2164706	161057	2211395	2211395	92.5599	VH01008:10:AAALH7NHV	0.9903	0.99	DRAGEN_GeoMx_3.8.4-96	HWTA21003	PNI	613f69c0-0839-466c-b291-530c0930a2ad	ab320738-1925-49dc-8012-2fb7b29c3d27	35502.6	61174	6824	2181	3435	PGP9.5_PNI	PASSED	keep	No	3435 | 002 | PGP9.5	3.3335	1.968	7.2694	5594	5.40853
3435|008|PGP9.5	slide_3435	3435	008	PGP9.5	3435 | 008 | PGP9.5	FALSE	FALSE	TRUE	FALSE	NA	78113.9	348	24879	58377	1258440	1221037	109930	1247031	1247031	90.997	VH01008:10:AAALH7NHV	0.9897	0.9904	DRAGEN_GeoMx_3.8.4-96	HWTA21003	PNI	7c69f528-aee4-4072-9a64-d33af0c92b11	388e45d2-9f87-4e26-8a5c-4af69b07440f	35502.6	61174	6824	2181	3435	PGP9.5_PNI	PASSED	keep	No	3435 | 008 | PGP9.5	2.0353	1.8286	5.6924	4572	3.31018
3435|010|PGP9.5	slide_3435	3435	010	PGP9.5	3435 | 010 | PGP9.5	FALSE	TRUE	TRUE	FALSE	NA	158390	667	15372	10196	584562	568306	40387	579801	579801	92.8934	VH01008:10:AAALH7NHV	0.9894	0.9905	DRAGEN_GeoMx_3.8.4-96	HWTA21003	PNI	3fa6ff6e-125d-4953-86d9-5ad76bcf9fa6	d19dba77-8ebb-413f-bc04-036217191427	35502.6	61174	6824	2181	3435	PGP9.5_PNI	PASSED	remove low number reads	No	3435 | 010 | PGP9.5	1.5596	1.7187	4.997	724	1.59348
3435|011|PGP9.5	slide_3435	3435	011	PGP9.5	3435 | 011 | PGP9.5	FALSE	FALSE	TRUE	FALSE	NA	162159	853	26519	56561	3704720	3595160	222483	3672261	3672261	93.8116	VH01008:10:AAALH7NHV	0.9901	0.9906	DRAGEN_GeoMx_3.8.4-96	HWTA21003	PNI	0982cd73-2a56-484f-8b5a-614b6e7108fc	0100a0ca-24f3-44d3-888c-617eddc8dc83	35502.6	61174	6824	2181	3435	PGP9.5_PNI	PASSED	keep	No	3435 | 011 | PGP9.5	4.1554	1.7712	7.6979	7923	6.74814
3435|012|PGP9.5	slide_3435	3435	012	PGP9.5	3435 | 012 | PGP9.5	FALSE	FALSE	TRUE	FALSE	NA	138482	563	13720	51904	2832604	2729357	168567	2805684	2805684	93.8239	VH01008:10:AAALH7NHV	0.9898	0.9904	DRAGEN_GeoMx_3.8.4-96	HWTA21003	PNI	50b05bdc-87f4-4eab-abe7-e3b9e723dd2e	982f4184-84ab-46bc-9397-67f2b22b3761	35502.6	61174	6824	2181	3435	PGP9.5_PNI	PASSED	keep	No	3435 | 012 | PGP9.5	3.0476	1.8627	6.7729	6770	5.18735
3435|013|PGP9.5	slide_3435	3435	013	PGP9.5	3435 | 013 | PGP9.5	FALSE	FALSE	TRUE	FALSE	NA	57117.7	300	12868	53271	1432626	1388974	95175	1419239	1419239	93.1478	VH01008:10:AAALH7NHV	0.9896	0.9905	DRAGEN_GeoMx_3.8.4-96	HWTA21003	PNI	370bf2b3-5a2a-45d5-ab36-b19d4851b044	9512a44c-58d3-4ca4-b7ee-0bae633d394f	35502.6	61174	6824	2181	3435	PGP9.5_PNI	PASSED	keep	No	3435 | 013 | PGP9.5	1.4677	1.6809	4.8294	5062	2.78363
3435|014|PGP9.5	slide_3435	3435	014	PGP9.5	3435 | 014 | PGP9.5	FALSE	FALSE	TRUE	FALSE	NA	182353	507	16744	6815	1095944	1060476	70085	1085896	1085896	93.3912	VH01008:10:AAALH7NHV	0.9894	0.9905	DRAGEN_GeoMx_3.8.4-96	HWTA21003	PNI	27438a5f-c4a0-4709-83c5-5df54a9b18dc	ffe04b17-8669-4120-b8d1-e99be3403238	35502.6	61174	6824	2181	3435	PGP9.5_PNI	PASSED	keep	No	3435 | 014 | PGP9.5	1.8502	1.7805	5.4112	1883	2.26735
3435|016|PGP9.5	slide_3435	3435	016	PGP9.5	3435 | 016 | PGP9.5	FALSE	FALSE	TRUE	FALSE	NA	91037.9	324	20992	22217	1805317	1747330	91397	1787539	1787539	94.7693	VH01008:10:AAALH7NHV	0.9899	0.9902	DRAGEN_GeoMx_3.8.4-96	HWTA21003	PNI	523d94e3-4d1d-4e4c-8b91-b83d3edbfe9a	efb46d58-ed2d-4db3-a74e-85985ccacf8c	35502.6	61174	6824	2181	3435	PGP9.5_PNI	FAILED QC	keep	No	3435 | 016 | PGP9.5	1.8102	1.926	5.6622	3231	2.72717
3583B|005|PanCK	8066321(3583)	8066321(3583)	005	PanCK	3583B | 005 | PanCK	FALSE	True	False	FALSE	NA	58818.9	360	16990	45806.8	10140617	9660046	645939	9996560	9996560	93.443	VH01008:25:AACC5JKHV	0.9873	0.9875	DRAGEN_GeoMx_3.8.4-96	HW0070923	nonPNI	12c4731c-a18e-4b59-8465-7331a692a6cc	ae1c8cb2-09b4-46cd-a56e-c43910c02cba	31753.2	55602.9	507	4966	3583	PanCK_nonPNI	PASSED	keep	3583B|005|PanCK		15.3833	1.4161	18.2155	10292	21.5856
3583B|006|PanCK	8066321(3583)	8066321(3583)	006	PanCK	3583B | 006 | PanCK	FALSE	True	False	FALSE	NA	61875.6	345	12507	49041.8	9729569	9251318	718910	9586409	9586409	92.3842	VH01008:25:AACC5JKHV	0.9866	0.9874	DRAGEN_GeoMx_3.8.4-96	HW0070923	nonPNI	ff1089a2-d92e-4357-ac0f-952fcdb50dee	445693d3-5bb8-4d0d-b420-e7ee1e3e62c0	31753.2	55602.9	507	4966	3583	PanCK_nonPNI	PASSED	keep	3583B|006|PanCK		15.9635	1.4795	18.9226	11595	23.361
3583B|001|PanCK	8066321(3583)	8066321(3583)	001	PanCK	3583B | 001 | PanCK	FALSE	True	False	FALSE	NA	49012.6	258	14781	40690	8070398	7685160	607849	7955129	7955129	92.2343	VH01008:25:AACC5JKHV	0.9877	0.9875	DRAGEN_GeoMx_3.8.4-96	HW0070923	PNI	97d0c2f8-544c-454a-8377-8cdd93093d26	9f57b43e-6a02-4edf-bb5f-1be5c9c77c8f	31753.2	55602.9	507	4966	3583	PanCK_PNI	PASSED	keep	3583B|001|PanCK		12.2572	1.4493	15.1559	10562	18.8806
3583B|002|FullROI	slide_3583B	8066321(3583)	002	Full ROI	3583B | 002 | Full ROI	FALSE	False	False	FALSE	NA	35146.7	113	29798	47375	3262427	3098428	288590	3215945	3215945	90.8635	VH01008:25:AACC5JKHV	0.9873	0.9876	DRAGEN_GeoMx_3.8.4-96	HW0070923	PNI	ac0ec74c-0a4b-45fe-b5e8-c5d4863b83c8	c0633d09-99b8-4cfc-921b-2c35e51cbef0	31753.2	55602.9	507	4966	3583	PanCK_PNI	PASSED (low nuclei)	<200 nuclei	No		7.3326	1.6975	10.7276	8349	10.1887
3583A|001|FullROI	slide_3583	8066321	001	FullROI	3583A | 001 | FullROI	FALSE	FALSE	FALSE	FALSE	NA	237880	1440	8409	7875	26482893	25191430	761091	26085906	26085906	96.9788	VH01008:20:AAANNKJHV	0.9887	0.9887	DRAGEN_GeoMx_3.8.4-96	HWTA21004	nonPNI	6001179c-d0c7-42fc-a91a-943829f2287e	8ccbdeee-32ac-4894-900a-30ad0b8aa9ed	35300	44648.2	6926	2252	3583	PGP9.5_nonPNI	PASSED	keep	3583A | 001 | FullROI	8066321 | 001 | Full ROI	33.1435	1.3203	35.7842	9921	36.5369
3583A|003|PanCK	slide_3583	8066321	003	PanCK	3583A | 003 | PanCK	FALSE	TRUE	FALSE	FALSE	NA	22175.5	209	12844.1	12377.4	3936306	3728534	110677	3871752	3871752	97.0316	VH01008:20:AAANNKJHV	0.9891	0.9891	DRAGEN_GeoMx_3.8.4-96	HWTA21004	nonPNI	e0e2c359-28f1-452a-b488-89e2bd1c29cc	4bd08f01-36c9-4a09-a9b8-10bbe447ee05	35300	44648.2	6926	2252	3583	PGP9.5_nonPNI	FAILED QC No cancer	remove	No	8066321 | 003 | PanCK	4.1085	1.9306	7.9697	3881	4.78246
3583A|004|FullROI	slide_3583	8066321	004	FullROI	3583A | 001 | FullROI	FALSE	FALSE	FALSE	FALSE	NA	120816	557	15915	9513.44	19938182	18984547	538180	19663563	19663563	97.1652	VH01008:20:AAANNKJHV	0.9889	0.9891	DRAGEN_GeoMx_3.8.4-96	HWTA21004	nonPNI	b104d203-fafa-4656-ba28-931eb6467d58	8c9b058b-8210-4960-904b-d67d83742750	35300	44648.2	6926	2252	3583	PGP9.5_nonPNI	PASSED	keep	3583A | 001 | FullROI	8066321 | 004 | Full ROI	21.4926	1.3656	24.2239	9710	25.198
3583B|003|FullROI	slide_3583B	8066321(3583)	003	Full ROI	3583B | 003 | Full ROI	FALSE	False	False	FALSE	NA	324806	1849	5531.92	23079.5	11583731	11006373	997744	11409366	11409366	91.119	VH01008:25:AACC5JKHV	0.9873	0.9873	DRAGEN_GeoMx_3.8.4-96	HW0070923	nonPNI	b2903015-e3a3-4651-b555-0246518126c1	e7cd1986-a737-4010-9428-870b9d51ec4a	31753.2	55602.9	507	4966	3583	PGP9.5_nonPNI	PASSED	keep	3583B|003|FullROI		34.2163	1.4221	37.0604	11479	42.4733
3583B|004|FullROI	slide_3583B	8066321(3583)	004	Full ROI	3583B | 004 | Full ROI	FALSE	False	False	FALSE	NA	253392	1167	10388.9	27491.4	9464139	9001864	887189	9320424	9320424	90.3326	VH01008:25:AACC5JKHV	0.9874	0.9878	DRAGEN_GeoMx_3.8.4-96	HW0070923	nonPNI	3da5f770-5fae-4f5c-8906-e9429bde63ee	a2add5bc-0ee0-4684-96e2-e6cbc798e432	31753.2	55602.9	507	4966	3583	PGP9.5_nonPNI	PASSED	keep	3583B|004|FullROI		30.7626	1.3799	33.5224	11792	38.1198
3583A|002|PanCK	slide_3583	8066321	002	PanCK	3583A | 002 | PanCK	FALSE	TRUE	FALSE	FALSE	NA	21816.2	150	17436.2	25463.4	5849530	5568228	150486	5762317	5762317	97.2974	VH01008:20:AAANNKJHV	0.9894	0.9893	DRAGEN_GeoMx_3.8.4-96	HWTA21004	PNI	bc5701f8-390e-431c-8f12-dc9b17464ff6	8d35c586-1ed6-4236-a4f7-f040674ab9d5	35300	44648.2	6926	2252	3583	PGP9.5_PNI	PASSED	removed small AOI	No	8066321 | 002 | PanCK	5.5839	1.832	9.2478	4035	6.4384
3583B|007|FullROI	slide_3583B	8066321(3583)	007	Full ROI	3583B | 007 | Full ROI	FALSE	False	False	FALSE	NA	184668	914	15246.7	39840.5	13047010	12399795	984450	12850076	12850076	92.2212	VH01008:25:AACC5JKHV	0.9872	0.9873	DRAGEN_GeoMx_3.8.4-96	HW0070923	PNI	b644ee63-ef28-4d51-b443-6186e2160df1	fd256556-d459-4c87-8e25-6e4a2e157f0b	31753.2	55602.9	507	4966	3583	PGP9.5_PNI	PASSED	keep	3583B|007|FullROI		29.538	1.4267	32.3913	12296	39.2374
3583B|008|FullROI	slide_3583B	8066321(3583)	008	Full ROI	3583B | 008 | Full ROI	FALSE	False	False	FALSE	NA	44194.3	266	29838	47616	5436808	5170099	397462	5356438	5356438	92.471	VH01008:25:AACC5JKHV	0.9875	0.9873	DRAGEN_GeoMx_3.8.4-96	HW0070923	PNI	7cb257bc-70a2-4b53-9ce3-bb3ba869c643	c699c2ce-54ef-4ed4-832b-a081c7739827	31753.2	55602.9	507	4966	3583	PGP9.5_PNI	PASSED (low nuclei)	remove_check	3583B|008|FullROI		13.3901	1.446	16.2821	8760	16.4463
4048|006|PanCK	slide_4048	8071905	006	PanCK	4048 | 006 | PanCK	FALSE	TRUE	FALSE	FALSE	NA	56994	312	36764.1	45734.2	19313409	18354469	584345	19035778	19035778	96.8163	VH01008:20:AAANNKJHV	0.9879	0.9898	DRAGEN_GeoMx_3.8.4-96	HWTA21004	nonPNI	3819b4b4-10ba-4df9-96d7-2056c80c41ea	32968c00-a67a-4dd4-9c6e-5b73a873c84f	35520.5	59203.1	6816	3166	4048	PanCK_nonPNI	PASSED	removed unmatched PIN	No	8071905 | 006 | PanCK	11.2897	1.4776	14.2448	12325	20.1417
4048|008|PanCK	slide_4048	8071905	008	PanCK	4048 | 008 | PanCK	FALSE	TRUE	FALSE	FALSE	NA	35572	234	37861.8	36191.5	4216	4006	3229	4156	4156	19.3959	VH01008:20:AAANNKJHV	0.9883	0.9884	DRAGEN_GeoMx_3.8.4-96	HWTA21004	nonPNI	8937a33a-b9ff-4e3d-abbd-8f24f13b9b5c	0b633e35-c3e0-4989-9ab2-3d8b7f763009	35520.5	59203.1	6816	3166	4048	PanCK_nonPNI	FAILED QC Reads	remove low number reads	No	8071905 | 008 | PanCK	1.0151	1.1064	3.2278	40	1.016
4048|009|PanCK	slide_4048	8071905	009	PanCK	4048 | 009 | PanCK	FALSE	TRUE	FALSE	FALSE	NA	61642.5	329	36624	43504	37624039	35816125	871725	37120451	37120451	97.5661	VH01008:20:AAANNKJHV	0.9897	0.9895	DRAGEN_GeoMx_3.8.4-96	HWTA21004	nonPNI	74333e31-a3a4-4f2d-88cf-31a2f465a722	2b31a2b0-bb4f-4f2c-898a-53c55dd22b6c	35520.5	59203.1	6816	3166	4048	PanCK_nonPNI	PASSED	removed unmatched PIN	No	8071905 | 009 | PanCK	17.7089	1.3791	20.4671	13651	30.8073
4048|007|PanCK	slide_4048	8071905	007	PanCK	4048 | 007 | PanCK	FALSE	TRUE	FALSE	FALSE	NA	45778.5	305	27954	31113	64704064	61522647	1478186	63781896	63781896	97.5973	VH01008:20:AAANNKJHV	0.9889	0.989	DRAGEN_GeoMx_3.8.4-96	HWTA21004	PNI	0a6daaf8-ede1-42d8-9264-3c632e634f91	fe120a49-7985-4074-a82c-fb10b1ade3b8	35520.5	59203.1	6816	3166	4048	PanCK_PNI	PASSED	no clear morphology	No	8071905 | 007 | PanCK	32.0105	1.3456	34.7017	14529	54.4688
4048|011|PanCK	slide_4048	8071905	011	PanCK	4048 | 011 | PanCK	FALSE	TRUE	FALSE	FALSE	NA	56019.4	321	28013	33416	39286814	37343976	896513	38729827	38729827	97.5993	VH01008:20:AAANNKJHV	0.9887	0.9887	DRAGEN_GeoMx_3.8.4-96	HWTA21004	PNI	98488e79-e273-4655-96fd-0f9e1ee969f3	55ae4bc7-6d84-41cd-8a2d-deb7bed453cd	35520.5	59203.1	6816	3166	4048	PanCK_PNI	PASSED	no clear morphology	No	8071905 | 011 | PanCK	19.1498	1.39	21.9298	14205	33.1056
4048|001|FullROI	slide_4048	8071905	001	FullROI	4048 | 001 | FullROI	FALSE	FALSE	FALSE	FALSE	NA	110982	582	21392	17863	42636141	40536657	1149480	42019702	42019702	97.1643	VH01008:20:AAANNKJHV	0.9888	0.9891	DRAGEN_GeoMx_3.8.4-96	HWTA21004	nonPNI	887c5e7e-bd24-46b5-baf0-de9346ecc080	6799e896-aa1b-4b87-ad34-7a4c57e6f612	35520.5	59203.1	6816	3166	4048	PGP9.5_nonPNI	PASSED	keep	No	8071905 | 001 | Full ROI	35.7682	1.3086	38.3854	13670	50.4206
4048|002|FullROI	slide_4048	8071905	002	FullROI	4048 | 002 | FullROI	FALSE	FALSE	FALSE	FALSE	NA	41941.2	171	20990	15916	11729029	11161282	249680	11565970	11565970	97.763	VH01008:20:AAANNKJHV	0.9887	0.9888	DRAGEN_GeoMx_3.8.4-96	HWTA21004	nonPNI	c42f0810-083e-43b3-b79b-74bee214269c	4e0796db-6fa7-415c-a7fa-770fe820a882	35520.5	59203.1	6816	3166	4048	PGP9.5_nonPNI	PASSED	keep	No	8071905 | 002 | Full ROI	8.0471	1.627	11.3011	8037	10.6644
4048|003|FullROI	slide_4048	8071905	003	FullROI	4048 | 003 | FullROI	FALSE	FALSE	FALSE	FALSE	NA	28734.1	128	19344	16063	14996535	14394108	454191	14821133	14821133	96.8446	VH01008:20:AAANNKJHV	0.9894	0.9896	DRAGEN_GeoMx_3.8.4-96	HWTA21004	nonPNI	774af58e-3bcc-40cb-86f4-2f7a67ffdf4a	b8232e8c-4483-4aa4-98f0-837231d5cc06	35520.5	59203.1	6816	3166	4048	PGP9.5_nonPNI	PASSED	keep	No	8071905 | 003 | Full ROI	20.2015	1.3652	22.9319	9130	22.2315
4048|004|FullROI	slide_4048	8071905	004	FullROI	4048 | 004 | FullROI	FALSE	FALSE	FALSE	FALSE	NA	42310.6	193	17131	15024	8134757	7747037	193415	8023515	8023515	97.5034	VH01008:20:AAANNKJHV	0.9889	0.9891	DRAGEN_GeoMx_3.8.4-96	HWTA21004	nonPNI	6c03881a-afbf-40b7-ba57-a2d7e0e7dd8b	f0ee5e28-74f0-4e3e-868a-ea3f8eb04be4	35520.5	59203.1	6816	3166	4048	PGP9.5_nonPNI	PASSED	keep	No	8071905 | 004 | Full ROI	5.8015	1.6957	9.1929	7440	8.32547
4048|010|FullROI	slide_4048	8071905	010	FullROI	4048 | 010 | FullROI	FALSE	FALSE	FALSE	FALSE	NA	207286	1229	28262	32121	45601300	43438685	1192451	44980411	44980411	97.2549	VH01008:20:AAANNKJHV	0.9893	0.9889	DRAGEN_GeoMx_3.8.4-96	HWTA21004	PNI	385045ea-b808-4cef-9c95-30173d5a724f	949f68d1-bf08-4ed4-a33a-ae9db2f0e025	35520.5	59203.1	6816	3166	4048	PGP9.5_PNI	PASSED	removed large AOI	No	8071905 | 010 | Full ROI	38.4445	1.3325	41.1096	13471	53.2231
4089|005|PanCK	slide_4089	8072246	005	PanCK	4089 | 005 | PanCK	FALSE	TRUE	FALSE	FALSE	NA	98436.1	902	23101.6	37388.5	20784043	19164676	959923	19883628	19883628	94.9912	VH01008:20:AAANNKJHV	0.9893	0.9891	DRAGEN_GeoMx_3.8.4-96	HWTA21004	nonPNI	7db5da9f-0821-49a9-84d9-946ed9f4f88b	d5850c0d-86de-42f4-8782-99362a1a2b57	35562.5	75962.6	6795	2978	4089	PanCK_nonPNI	PASSED	Lost morphological features in the section	No	8072246 | 005 | PanCK	16.12	1.4042	18.9285	13722	30.3886
4089|006|PanCK	slide_4089	8072246	006	PanCK	4089 | 006 | PanCK	FALSE	TRUE	FALSE	FALSE	NA	141490	1311	25473.3	35179.9	1141611	1084672	370043	1127229	1127229	65.8843	VH01008:20:AAANNKJHV	0.9885	0.989	DRAGEN_GeoMx_3.8.4-96	HWTA21004	nonPNI	b714b97d-087e-4e25-8ee6-ea5a1c805cdf	9a711478-f3ef-446a-b783-899aee3b87d7	35562.5	75962.6	6795	2978	4089	PanCK_nonPNI	PASSED	Lost morphological features in the section	No	8072246 | 006 | PanCK	6.3595	1.7845	9.9286	10306	11.168
4089|007|PanCK	slide_4089	8072246	007	PanCK	4089 | 007 | PanCK	FALSE	TRUE	FALSE	FALSE	NA	101946	974	17261	37859.8	23161590	21999714	587839	22824619	22824619	97.328	VH01008:20:AAANNKJHV	0.9882	0.9899	DRAGEN_GeoMx_3.8.4-96	HWTA21004	nonPNI	f43c5ce1-bd71-4b4e-9359-05c613fc235f	59ee226d-be3b-48b0-aacc-3ee46c59893b	35562.5	75962.6	6795	2978	4089	PanCK_nonPNI	PASSED	Lost morphological features in the section	No	8072246 | 007 | PanCK	10.7189	1.4725	13.6638	12731	16.0203

## Sheet: Sheet1
1875|001|PanCK
1875|002|PanCK
1875|003|PanCK
1875|004|PanCK
1875|005|PanCK
1877|004|PanCK
1877|006|PanCK
1938|001|PanCK
1938|002|PanCK
1938|003|PanCK
1938|004|PanCK
1938|007|PanCK
1938|009|PanCK
1938|011|PanCK
1938|015|PanCK
1942|001|PanCK
1942|002|PanCK
1942|003|PanCK
1942|004|PanCK
1942|005|PanCK
1942|011|PanCK
1942|012|PanCK
1944|002|PanCK
1944|005|PanCK
1944|006|PanCK
1944|007|PanCK
1944|011|PanCK
1993|001|PanCK
1993|004|PanCK
1993|005|PanCK
1993|006|PanCK
1993|010|PanCK
2343|001|PanCK
2343|002|PanCK
2343|003|PanCK
2343|004|PanCK
2343|008|PanCK
2920|001|PanCK
2920|002|PanCK
2920|003|PanCK
2920|007|PanCK
2920|008|PanCK
3435|001|PanCK
3435|004|PanCK
3435|005|PanCK
3435|006|PanCK
3435|008|PanCK
3435|011|PanCK
3435|012|PanCK
3435|013|PanCK
3435|015|PanCK
3583B|001|PanCK
3583B|005|PanCK
3583B|006|PanCK
1898|001|FullROI
1898|007|FullROI
1938|008|FullROI
1938|012|FullROI
1938|014|FullROI
1942|006|FullROI
1942|007|FullROI
1942|010|FullROI
2343|005|FullROI
2343|006|FullROI
3583A|001|FullROI
3583A|004|FullROI
3583B|003|FullROI
3583B|004|FullROI
3583B|007|FullROI
3583B|008|FullROI
1944|012|FullROI
