# Supplementary material for: Spatial Transcriptomics of Perineural Invasion in Pancreatic Ductal Adenocarcinomas
Source: Research Square preprint supplement (doi:10.21203/rs.3.rs-5253213/v1), 2024-12-02
Supplement: Supplementary file 3 [file 64b072cfc9b6c47ba88d0b0e.xlsx]

## Sheet: BSR_Inf
Supplementary Table 9. BulkSignalR, receptor, ligand and pathways with significant differential expression in the cancer component of PNI foci compared to non-PNI.
	L	R	pw.id	pw.name	pval	qval	L.logFC	R.logFC	LR.pval	LR.corr	rank	len	rank.pval	rank.corr	LR.score	L.expr	R.expr
2	CGN	F11R	R-HSA-1500931	Cell-Cell communication	5.28363e-10	1.80524e-09	0.521569	0.475911	2.04229e-06	1	2	5	0.0863441	1	0.564867	6.63692	7.16052
21	CGN	F11R	R-HSA-170834	Signaling by TGF-beta Receptor Complex	5.52942e-07	8.39653e-07	0.521569	0.475911	2.04229e-06	1	14	26	0.42215	1	0.564867	6.63692	7.16052
22	CGN	F11R	R-HSA-202733	Cell surface interactions at the vascular wall	2.68847e-12	2.75569e-11	0.521569	0.475911	2.04229e-06	1	18	33	0.134214	1	0.564867	6.63692	7.16052
23	CGN	F11R	R-HSA-216083	Integrin cell surface interactions	3.07946e-09	9.01843e-09	0.521569	0.475911	2.04229e-06	1	2	4	0.0736188	1	0.564867	6.63692	7.16052
24	CGN	F11R	R-HSA-2173791	TGF-beta receptor signaling in EMT (epithelial to mesenchymal transition)	2.06564e-08	5.2932e-08	0.521569	0.475911	2.04229e-06	1	6	12	0.235359	1	0.564867	6.63692	7.16052
25	CGN	F11R	R-HSA-420029	Tight junction interactions	5.28363e-10	1.80524e-09	0.521569	0.475911	2.04229e-06	1	2	5	0.0863441	1	0.564867	6.63692	7.16052
26	CGN	F11R	R-HSA-421270	Cell-cell junction organization	5.28363e-10	1.80524e-09	0.521569	0.475911	2.04229e-06	1	2	5	0.0863441	1	0.564867	6.63692	7.16052
27	CGN	F11R	R-HSA-446728	Cell junction organization	5.28363e-10	1.80524e-09	0.521569	0.475911	2.04229e-06	1	2	5	0.0863441	1	0.564867	6.63692	7.16052
28	CGN	F11R	R-HSA-9006936	Signaling by TGF-beta family members	3.71286e-10	1.80524e-09	0.521569	0.475911	2.04229e-06	1	20	37	0.211027	1	0.564867	6.63692	7.16052
3	EFNA1	EPHA2	R-HSA-2682334	EPH-Ephrin signaling	0.000107875	0.000110572	0.395888	0.444391	0.00029259	1	2	5	0.617966	1	0.570306	6.74933	7.3604
31	EFNA1	EPHA2	R-HSA-3928663	EPHA-mediated growth cone collapse	3.50142e-05	4.10166e-05	0.395888	0.444391	0.00029259	1	2	4	0.342762	1	0.570306	6.74933	7.3604
32	EFNA1	EPHA2	R-HSA-3928665	EPH-ephrin mediated repulsion of cells	0.000107875	0.000110572	0.395888	0.444391	0.00029259	1	2	5	0.617966	1	0.570306	6.74933	7.3604
4	IL7	IL2RG	R-HSA-1266695	Interleukin-7 signaling	4.47114e-05	4.82412e-05	0.48926	0.538313	0.000364414	1	9	17	0.363832	1	0.50712	5.31691	5.61493
41	IL7	IL2RG	R-HSA-451927	Interleukin-2 family signaling	1.52196e-05	1.89092e-05	0.48926	0.538313	0.000364414	1	18	33	0.325808	1	0.50712	5.31691	5.61493
42	IL7	IL2RG	R-HSA-512988	Interleukin-3, Interleukin-5 and GM-CSF signaling	9.00989e-06	1.27381e-05	0.48926	0.538313	0.000364414	1	20	37	0.318865	1	0.50712	5.31691	5.61493
43	IL7	IL2RG	R-HSA-5673001	RAF/MAP kinase cascade	1.79326e-07	3.58061e-07	0.48926	0.538313	0.000364414	1	68	125	0.318865	1	0.50712	5.31691	5.61493
44	IL7	IL2RG	R-HSA-5683057	MAPK family signaling cascades	2.23208e-12	2.75569e-11	0.48926	0.538313	0.000364414	1	91	167	0.254154	1	0.50712	5.31691	5.61493
45	IL7	IL2RG	R-HSA-5684996	MAPK1/MAPK3 signaling	1.2533e-09	3.95271e-09	0.48926	0.538313	0.000364414	1	70	128	0.271305	1	0.50712	5.31691	5.61493
46	IL7	IL2RG	R-HSA-6785807	Interleukin-4 and Interleukin-13 signaling	3.99539e-10	1.80524e-09	0.48926	0.538313	0.000364414	1	56	102	0.241254	1	0.50712	5.31691	5.61493
47	IL7	IL2RG	R-HSA-8983432	Interleukin-15 signaling	8.79742e-07	1.28819e-06	0.48926	0.538313	0.000364414	1	7	13	0.166854	1	0.50712	5.31691	5.61493
48	IL7	IL2RG	R-HSA-8985947	Interleukin-9 signaling	0.00023481	0.00023481	0.48926	0.538313	0.000364414	1	4	8	0.621893	1	0.50712	5.31691	5.61493
49	IL7	IL2RG	R-HSA-9020558	Interleukin-2 signaling	3.81137e-05	4.22612e-05	0.48926	0.538313	0.000364414	1	5	10	0.357917	1	0.50712	5.31691	5.61493
410	IL7	IL2RG	R-HSA-9020958	Interleukin-21 signaling	3.81382e-05	4.22612e-05	0.48926	0.538313	0.000364414	1	4	9	0.404675	1	0.50712	5.31691	5.61493
411	IL7	IL2RG	R-HSA-912526	Interleukin receptor SHC signaling	2.50952e-05	3.02619e-05	0.48926	0.538313	0.000364414	1	9	18	0.357917	1	0.50712	5.31691	5.61493
412	IL7	IL2RG	R-HSA-9607240	FLT3 Signaling	1.83397e-07	3.58061e-07	0.48926	0.538313	0.000364414	1	75	137	0.321553	1	0.50712	5.31691	5.61493
5	TNFSF10	TNFRSF10B	R-HSA-109581	Apoptosis	1.41085e-17	2.89224e-16	0.478748	0.505245	1.52894e-05	1	47	86	0.143136	1	0.538432	5.81907	6.5948
51	TNFSF10	TNFRSF10B	R-HSA-140534	Caspase activation via Death Receptors in the presence of ligand	2.32177e-07	3.66125e-07	0.478748	0.505245	1.52894e-05	1	3	6	0.194001	1	0.538432	5.81907	6.5948
52	TNFSF10	TNFRSF10B	R-HSA-202733	Cell surface interactions at the vascular wall	1.3492e-05	1.8439e-05	0.478748	0.505245	1.52894e-05	1	1	2	0.939383	1	0.538432	5.81907	6.5948
53	TNFSF10	TNFRSF10B	R-HSA-3371378	Regulation by c-FLIP	2.32177e-07	3.66125e-07	0.478748	0.505245	1.52894e-05	1	3	6	0.194001	1	0.538432	5.81907	6.5948
54	TNFSF10	TNFRSF10B	R-HSA-3700989	Transcriptional Regulation by TP53	6.09392e-11	4.16418e-10	0.478748	0.505245	1.52894e-05	1	119	217	0.309339	1	0.538432	5.81907	6.5948
55	TNFSF10	TNFRSF10B	R-HSA-5213460	RIPK1-mediated regulated necrosis	2.62113e-08	5.97035e-08	0.478748	0.505245	1.52894e-05	1	4	9	0.179666	1	0.538432	5.81907	6.5948
56	TNFSF10	TNFRSF10B	R-HSA-5218859	Regulated Necrosis	2.62113e-08	5.97035e-08	0.478748	0.505245	1.52894e-05	1	4	9	0.179666	1	0.538432	5.81907	6.5948
57	TNFSF10	TNFRSF10B	R-HSA-5218900	CASP8 activity is inhibited	2.32177e-07	3.66125e-07	0.478748	0.505245	1.52894e-05	1	3	6	0.194001	1	0.538432	5.81907	6.5948
58	TNFSF10	TNFRSF10B	R-HSA-5357769	Caspase activation via extrinsic apoptotic signalling pathway	2.32177e-07	3.66125e-07	0.478748	0.505245	1.52894e-05	1	3	6	0.194001	1	0.538432	5.81907	6.5948
59	TNFSF10	TNFRSF10B	R-HSA-5357801	Programmed Cell Death	6.87116e-18	2.81717e-16	0.478748	0.505245	1.52894e-05	1	48	88	0.143136	1	0.538432	5.81907	6.5948
510	TNFSF10	TNFRSF10B	R-HSA-5633008	TP53 Regulates Transcription of Cell Death Genes	1.81425e-07	3.58061e-07	0.478748	0.505245	1.52894e-05	1	15	29	0.300558	1	0.538432	5.81907	6.5948
511	TNFSF10	TNFRSF10B	R-HSA-5675482	Regulation of necroptotic cell death	4.01885e-09	1.09848e-08	0.478748	0.505245	1.52894e-05	1	4	8	0.0900714	1	0.538432	5.81907	6.5948
512	TNFSF10	TNFRSF10B	R-HSA-6803211	TP53 Regulates Transcription of Death Receptors and Ligands	1.47927e-05	1.89092e-05	0.478748	0.505245	1.52894e-05	1	2	5	0.939383	1	0.538432	5.81907	6.5948
513	TNFSF10	TNFRSF10B	R-HSA-69416	Dimerization of procaspase-8	2.32177e-07	3.66125e-07	0.478748	0.505245	1.52894e-05	1	3	6	0.194001	1	0.538432	5.81907	6.5948
514	TNFSF10	TNFRSF10B	R-HSA-73887	Death Receptor Signalling	4.4796e-11	3.67327e-10	0.478748	0.505245	1.52894e-05	1	28	52	0.194001	1	0.538432	5.81907	6.5948
515	TNFSF10	TNFRSF10B	R-HSA-75158	TRAIL signaling	1.41168e-05	1.86706e-05	0.478748	0.505245	1.52894e-05	1	3	6	0.819226	1	0.538432	5.81907	6.5948

## Sheet: BSR_Inf_RedBestPath
	L	R	pw.id	pw.name	pval	qval	L.logFC	R.logFC	LR.pval	LR.corr	rank	len	rank.pval	rank.corr	LR.score	L.expr	R.expr
22	CGN	F11R	R-HSA-202733	Cell surface interactions at the vascular wall	2.68847e-12	2.75569e-11	0.521569	0.475911	2.04229e-06	1	18	33	0.134214	1	0.564867	6.63692	7.16052
31	EFNA1	EPHA2	R-HSA-3928663	EPHA-mediated growth cone collapse	3.50142e-05	4.10166e-05	0.395888	0.444391	0.00029259	1	2	4	0.342762	1	0.570306	6.74933	7.3604
44	IL7	IL2RG	R-HSA-5683057	MAPK family signaling cascades	2.23208e-12	2.75569e-11	0.48926	0.538313	0.000364414	1	91	167	0.254154	1	0.50712	5.31691	5.61493
59	TNFSF10	TNFRSF10B	R-HSA-5357801	Programmed Cell Death	6.87116e-18	2.81717e-16	0.478748	0.505245	1.52894e-05	1	48	88	0.143136	1	0.538432	5.81907	6.5948

## Sheet: BSR_Inf_RedPath
	L	R	pw.id	pw.name	pval	qval	L.logFC	R.logFC	LR.pval	LR.corr	rank	len	rank.pval	rank.corr	LR.score	L.expr	R.expr
2	{CGN}	{F11R}	R-HSA-1500931	Cell-Cell communication	5.28363e-10	1.80524e-09	0.521569	0.475911	2.04229e-06	1	2	5	0.0863441	1	0.564867	6.63692	7.16052
21	{CGN}	{F11R}	R-HSA-170834	Signaling by TGF-beta Receptor Complex	5.52942e-07	8.39653e-07	0.521569	0.475911	2.04229e-06	1	14	26	0.42215	1	0.564867	6.63692	7.16052
22	{CGN;TNFSF10}	{F11R;TNFRSF10B}	R-HSA-202733	Cell surface interactions at the vascular wall	2.68847e-12	2.75569e-11	0.521569	0.475911	2.04229e-06	1	18	33	0.134214	1	0.564867	6.63692	7.16052
23	{CGN}	{F11R}	R-HSA-216083	Integrin cell surface interactions	3.07946e-09	9.01843e-09	0.521569	0.475911	2.04229e-06	1	2	4	0.0736188	1	0.564867	6.63692	7.16052
24	{CGN}	{F11R}	R-HSA-2173791	TGF-beta receptor signaling in EMT (epithelial to mesenchymal transition)	2.06564e-08	5.2932e-08	0.521569	0.475911	2.04229e-06	1	6	12	0.235359	1	0.564867	6.63692	7.16052
25	{CGN}	{F11R}	R-HSA-420029	Tight junction interactions	5.28363e-10	1.80524e-09	0.521569	0.475911	2.04229e-06	1	2	5	0.0863441	1	0.564867	6.63692	7.16052
26	{CGN}	{F11R}	R-HSA-421270	Cell-cell junction organization	5.28363e-10	1.80524e-09	0.521569	0.475911	2.04229e-06	1	2	5	0.0863441	1	0.564867	6.63692	7.16052
27	{CGN}	{F11R}	R-HSA-446728	Cell junction organization	5.28363e-10	1.80524e-09	0.521569	0.475911	2.04229e-06	1	2	5	0.0863441	1	0.564867	6.63692	7.16052
28	{CGN}	{F11R}	R-HSA-9006936	Signaling by TGF-beta family members	3.71286e-10	1.80524e-09	0.521569	0.475911	2.04229e-06	1	20	37	0.211027	1	0.564867	6.63692	7.16052
3	{EFNA1}	{EPHA2}	R-HSA-2682334	EPH-Ephrin signaling	0.000107875	0.000110572	0.395888	0.444391	0.00029259	1	2	5	0.617966	1	0.570306	6.74933	7.3604
31	{EFNA1}	{EPHA2}	R-HSA-3928663	EPHA-mediated growth cone collapse	3.50142e-05	4.10166e-05	0.395888	0.444391	0.00029259	1	2	4	0.342762	1	0.570306	6.74933	7.3604
32	{EFNA1}	{EPHA2}	R-HSA-3928665	EPH-ephrin mediated repulsion of cells	0.000107875	0.000110572	0.395888	0.444391	0.00029259	1	2	5	0.617966	1	0.570306	6.74933	7.3604
4	{IL7}	{IL2RG}	R-HSA-1266695	Interleukin-7 signaling	4.47114e-05	4.82412e-05	0.48926	0.538313	0.000364414	1	9	17	0.363832	1	0.50712	5.31691	5.61493
41	{IL7}	{IL2RG}	R-HSA-451927	Interleukin-2 family signaling	1.52196e-05	1.89092e-05	0.48926	0.538313	0.000364414	1	18	33	0.325808	1	0.50712	5.31691	5.61493
42	{IL7}	{IL2RG}	R-HSA-512988	Interleukin-3, Interleukin-5 and GM-CSF signaling	9.00989e-06	1.27381e-05	0.48926	0.538313	0.000364414	1	20	37	0.318865	1	0.50712	5.31691	5.61493
43	{IL7}	{IL2RG}	R-HSA-5673001	RAF/MAP kinase cascade	1.79326e-07	3.58061e-07	0.48926	0.538313	0.000364414	1	68	125	0.318865	1	0.50712	5.31691	5.61493
44	{IL7}	{IL2RG}	R-HSA-5683057	MAPK family signaling cascades	2.23208e-12	2.75569e-11	0.48926	0.538313	0.000364414	1	91	167	0.254154	1	0.50712	5.31691	5.61493
45	{IL7}	{IL2RG}	R-HSA-5684996	MAPK1/MAPK3 signaling	1.2533e-09	3.95271e-09	0.48926	0.538313	0.000364414	1	70	128	0.271305	1	0.50712	5.31691	5.61493
46	{IL7}	{IL2RG}	R-HSA-6785807	Interleukin-4 and Interleukin-13 signaling	3.99539e-10	1.80524e-09	0.48926	0.538313	0.000364414	1	56	102	0.241254	1	0.50712	5.31691	5.61493
47	{IL7}	{IL2RG}	R-HSA-8983432	Interleukin-15 signaling	8.79742e-07	1.28819e-06	0.48926	0.538313	0.000364414	1	7	13	0.166854	1	0.50712	5.31691	5.61493
48	{IL7}	{IL2RG}	R-HSA-8985947	Interleukin-9 signaling	0.00023481	0.00023481	0.48926	0.538313	0.000364414	1	4	8	0.621893	1	0.50712	5.31691	5.61493
49	{IL7}	{IL2RG}	R-HSA-9020558	Interleukin-2 signaling	3.81137e-05	4.22612e-05	0.48926	0.538313	0.000364414	1	5	10	0.357917	1	0.50712	5.31691	5.61493
410	{IL7}	{IL2RG}	R-HSA-9020958	Interleukin-21 signaling	3.81382e-05	4.22612e-05	0.48926	0.538313	0.000364414	1	4	9	0.404675	1	0.50712	5.31691	5.61493
411	{IL7}	{IL2RG}	R-HSA-912526	Interleukin receptor SHC signaling	2.50952e-05	3.02619e-05	0.48926	0.538313	0.000364414	1	9	18	0.357917	1	0.50712	5.31691	5.61493
412	{IL7}	{IL2RG}	R-HSA-9607240	FLT3 Signaling	1.83397e-07	3.58061e-07	0.48926	0.538313	0.000364414	1	75	137	0.321553	1	0.50712	5.31691	5.61493
5	{TNFSF10}	{TNFRSF10B}	R-HSA-109581	Apoptosis	1.41085e-17	2.89224e-16	0.478748	0.505245	1.52894e-05	1	47	86	0.143136	1	0.538432	5.81907	6.5948
51	{TNFSF10}	{TNFRSF10B}	R-HSA-140534	Caspase activation via Death Receptors in the presence of ligand	2.32177e-07	3.66125e-07	0.478748	0.505245	1.52894e-05	1	3	6	0.194001	1	0.538432	5.81907	6.5948
53	{TNFSF10}	{TNFRSF10B}	R-HSA-3371378	Regulation by c-FLIP	2.32177e-07	3.66125e-07	0.478748	0.505245	1.52894e-05	1	3	6	0.194001	1	0.538432	5.81907	6.5948
54	{TNFSF10}	{TNFRSF10B}	R-HSA-3700989	Transcriptional Regulation by TP53	6.09392e-11	4.16418e-10	0.478748	0.505245	1.52894e-05	1	119	217	0.309339	1	0.538432	5.81907	6.5948
55	{TNFSF10}	{TNFRSF10B}	R-HSA-5213460	RIPK1-mediated regulated necrosis	2.62113e-08	5.97035e-08	0.478748	0.505245	1.52894e-05	1	4	9	0.179666	1	0.538432	5.81907	6.5948
56	{TNFSF10}	{TNFRSF10B}	R-HSA-5218859	Regulated Necrosis	2.62113e-08	5.97035e-08	0.478748	0.505245	1.52894e-05	1	4	9	0.179666	1	0.538432	5.81907	6.5948
57	{TNFSF10}	{TNFRSF10B}	R-HSA-5218900	CASP8 activity is inhibited	2.32177e-07	3.66125e-07	0.478748	0.505245	1.52894e-05	1	3	6	0.194001	1	0.538432	5.81907	6.5948
58	{TNFSF10}	{TNFRSF10B}	R-HSA-5357769	Caspase activation via extrinsic apoptotic signalling pathway	2.32177e-07	3.66125e-07	0.478748	0.505245	1.52894e-05	1	3	6	0.194001	1	0.538432	5.81907	6.5948
59	{TNFSF10}	{TNFRSF10B}	R-HSA-5357801	Programmed Cell Death	6.87116e-18	2.81717e-16	0.478748	0.505245	1.52894e-05	1	48	88	0.143136	1	0.538432	5.81907	6.5948
510	{TNFSF10}	{TNFRSF10B}	R-HSA-5633008	TP53 Regulates Transcription of Cell Death Genes	1.81425e-07	3.58061e-07	0.478748	0.505245	1.52894e-05	1	15	29	0.300558	1	0.538432	5.81907	6.5948
511	{TNFSF10}	{TNFRSF10B}	R-HSA-5675482	Regulation of necroptotic cell death	4.01885e-09	1.09848e-08	0.478748	0.505245	1.52894e-05	1	4	8	0.0900714	1	0.538432	5.81907	6.5948
512	{TNFSF10}	{TNFRSF10B}	R-HSA-6803211	TP53 Regulates Transcription of Death Receptors and Ligands	1.47927e-05	1.89092e-05	0.478748	0.505245	1.52894e-05	1	2	5	0.939383	1	0.538432	5.81907	6.5948
513	{TNFSF10}	{TNFRSF10B}	R-HSA-69416	Dimerization of procaspase-8	2.32177e-07	3.66125e-07	0.478748	0.505245	1.52894e-05	1	3	6	0.194001	1	0.538432	5.81907	6.5948
514	{TNFSF10}	{TNFRSF10B}	R-HSA-73887	Death Receptor Signalling	4.4796e-11	3.67327e-10	0.478748	0.505245	1.52894e-05	1	28	52	0.194001	1	0.538432	5.81907	6.5948
515	{TNFSF10}	{TNFRSF10B}	R-HSA-75158	TRAIL signaling	1.41168e-05	1.86706e-05	0.478748	0.505245	1.52894e-05	1	3	6	0.819226	1	0.538432	5.81907	6.5948

## Sheet: BSR_Inf_RedReceptor
	L	R	pw.id	pw.name	pval	qval	L.logFC	R.logFC	LR.pval	LR.corr	rank	len	rank.pval	rank.corr	LR.score	L.expr	R.expr
22	{CGN}	F11R	R-HSA-202733	Cell surface interactions at the vascular wall	2.68847e-12	2.75569e-11	0.521569	0.475911	2.04229e-06	1	18	33	0.134214	1	0.564867	6.63692	7.16052
31	{EFNA1}	EPHA2	R-HSA-3928663	EPHA-mediated growth cone collapse	3.50142e-05	4.10166e-05	0.395888	0.444391	0.00029259	1	2	4	0.342762	1	0.570306	6.74933	7.3604
44	{IL7}	IL2RG	R-HSA-5683057	MAPK family signaling cascades	2.23208e-12	2.75569e-11	0.48926	0.538313	0.000364414	1	91	167	0.254154	1	0.50712	5.31691	5.61493
59	{TNFSF10}	TNFRSF10B	R-HSA-5357801	Programmed Cell Death	6.87116e-18	2.81717e-16	0.478748	0.505245	1.52894e-05	1	48	88	0.143136	1	0.538432	5.81907	6.5948
