# Supplementary material for: Spatial Transcriptomics of Perineural Invasion in Pancreatic Ductal Adenocarcinomas
Source: Research Square preprint supplement (doi:10.21203/rs.3.rs-5253213/v1), 2024-12-02
Supplement: Supplementary file 4 [file 8c53c6cccddaca93ace058a3.xlsx]

## Sheet: PanCK_40ROIs_slidesPNInonPNI_gr
Supplementary Table 3. Differentially expressed genes in the cancer compartment of PNI compared to cancer in non-PNI areas (away from any visible nerves). Lines in green represent genes down-regulated and in red represent genes up-regulated.
HUGOSymbol	TargetGroup	AnalyteType	CodeClass	ProbePool	MinCount	MaxCount	MedianCount	GeomeanCount	NumberOfProbesIncluded	NumberOfProbesTotal	GeneID	genes_lowCount_overNsamples	mean_zscore	mean_expr	logFC	AveExpr	t	P.Value	adj.P.Val	B	AvgExp_PanCK_PNI	AvgExp_PanCK_nonPNI
PADI1	All Targets	RNA	Endogenous	1	1	80	16.5	15.4296	1	1	29943	FALSE	2.67363	5.69056	-1.60708	5.5753	-7.50474	9.308e-10	1.67898e-05	11.6318	5.20988	6.12344
IGFBP3	All Targets	RNA	Endogenous	1	2	343	20	21.3837	1	1	3486	FALSE	3.57852	6.10756	-1.34229	6.01638	-2.9084	0.00699007	0.105955	-2.46875	5.7284	6.44835
VGLL1	All Targets	RNA	Endogenous	1	1	38	15	11.1861	1	1	51442	FALSE	1.4827	5.28179	-1.33713	5.14565	-5.54135	2.00057e-06	0.00355952	4.77683	4.79523	5.67129
S100A4	All Targets	RNA	Endogenous	1	2	2175	33.5	38.0009	1	1	6275	FALSE	5.60349	6.89772	-1.15024	6.8471	-2.63485	0.0134952	0.139776	-3.07332	6.5426	7.30385
S100A9	All Targets	RNA	Endogenous	1	1	448	10	9.23597	1	1	6280	FALSE	1.87417	5.02926	-1.08268	4.88017	-2.98397	0.00576542	0.0982548	-2.2229	4.55187	5.37261
PRPS2	All Targets	RNA	Endogenous	1	1	55	12.5	10.0445	1	1	5634	FALSE	0.756927	5.13193	-1.05669	4.99507	-6.17443	2.77079e-08	0.000166598	8.49361	4.72785	5.3959
NMRK2	All Targets	RNA	Endogenous	1	1	90	12	8.48832	1	1	27231	FALSE	1.16732	4.93971	-1.01112	4.7832	-5.04009	3.01323e-06	0.00418098	4.3058	4.5269	5.16764
CD1E	All Targets	RNA	Endogenous	1	1	58	13	8.95459	1	1	913	FALSE	1.18361	5.02391	-0.994673	4.86905	-5.21858	1.44376e-06	0.00350875	4.97738	4.73306	5.07305
RBBP8NL	All Targets	RNA	Endogenous	1	1	48	11.5	9.89314	1	1	140893	FALSE	1.4449	5.10556	-0.988639	4.95491	-3.03587	0.00486246	0.0937775	-2.07932	4.72345	5.30211
LDB3	All Targets	RNA	Endogenous	1	1	36	13	9.00297	1	1	11155	FALSE	0.505463	4.99741	-0.97788	4.84991	-5.19982	1.55616e-06	0.00350875	4.91712	4.68881	5.09156
PRAMEF20	All Targets	RNA	Endogenous	1	1	36	10	6.79504	1	1	645425	FALSE	0.946621	4.68857	-0.970689	4.48527	-4.5998	1.63444e-05	0.0099367	2.77796	4.25496	4.83074
SNTA1	All Targets	RNA	Endogenous	1	1	46	12	8.99945	1	1	6640	FALSE	0.612257	4.99863	-0.967888	4.85094	-5.15415	1.86697e-06	0.00355952	4.72445	4.64907	5.15374
DEFA5	All Targets	RNA	Endogenous	1	1	40	6.5	6.11942	1	1	1670	FALSE	0.52239	4.54368	-0.950316	4.33829	-4.7408	9.38767e-06	0.00806357	3.27128	4.26437	4.44919
IGHA1	All Targets	RNA	Endogenous	1	1	627	13.5	13.5721	1	1	3493	FALSE	2.38018	5.51918	-0.947745	5.418	-2.52877	0.0172746	0.157243	-3.18076	5.02212	6.01183
PKP1	All Targets	RNA	Endogenous	1	1	149	14.5	10.4751	1	1	5317	FALSE	1.35522	5.19432	-0.927454	5.06353	-2.71799	0.0109926	0.129007	-2.7898	4.84159	5.39644
GPR162	All Targets	RNA	Endogenous	1	1	30	8	6.29079	1	1	27239	FALSE	0.642809	4.58375	-0.918525	4.37392	-4.5216	2.15318e-05	0.0113441	2.52907	4.18876	4.65165
ZSCAN10	All Targets	RNA	Endogenous	1	1	44	13	8.10943	1	1	84891	FALSE	1.43227	4.88646	-0.91075	4.72596	-4.08426	0.00013968	0.022496	0.932481	4.55754	4.9786
RBP7	All Targets	RNA	Endogenous	1	1	31	9.5	7.55294	1	1	116362	FALSE	0.106977	4.78564	-0.900017	4.61403	-4.70405	1.08041e-05	0.00858269	3.13852	4.39125	4.9482
RRP9	All Targets	RNA	Endogenous	1	1	31	10.5	7.29939	1	1	9136	FALSE	0.647239	4.74942	-0.892887	4.56534	-4.2757	5.33433e-05	0.0160368	1.73403	4.33474	4.91125
APCDD1	All Targets	RNA	Endogenous	1	1	55	14	11.1866	1	1	147495	FALSE	0.72498	5.2653	-0.891378	5.13332	-4.25377	6.54688e-05	0.0174981	1.58487	4.89114	5.4966
MEIOB	All Targets	RNA	Endogenous	1	1	40	12	7.96386	1	1	254528	FALSE	0.815599	4.85527	-0.885996	4.68835	-4.60232	1.58966e-05	0.0099367	2.79626	4.44884	5.04761
XIRP1	All Targets	RNA	Endogenous	1	1	74	9	6.92075	1	1	165904	FALSE	0.787739	4.68876	-0.885139	4.50215	-3.93508	0.000194374	0.0257802	0.612446	4.27565	4.84191
LGALS1	All Targets	RNA	Endogenous	1	2	110	15	15.8233	1	1	3956	FALSE	2.1615	5.694	-0.885052	5.59932	-2.89552	0.00711235	0.10691	-2.45355	5.31904	6.01973
MAST1	All Targets	RNA	Endogenous	1	1	42	11	8.06007	1	1	22983	FALSE	0.165294	4.86413	-0.882419	4.7061	-4.98797	3.60028e-06	0.0046387	4.15383	4.54355	4.94993
MINPP1	All Targets	RNA	Endogenous	1	1	43	15	9.77402	1	1	9562	FALSE	0.476939	5.09206	-0.882092	4.96037	-5.09427	2.36801e-06	0.00355952	4.5424	4.79944	5.20177
CLIP4	All Targets	RNA	Endogenous	1	1	49	14	11.5747	1	1	79745	FALSE	0.181079	5.30022	-0.881253	5.17706	-4.84762	6.22149e-06	0.00701395	3.67331	4.97951	5.47339
TXNDC2	All Targets	RNA	Endogenous	1	1	111	10	8.24148	1	1	84203	FALSE	0.82442	4.90598	-0.874258	4.74401	-3.03838	0.00449092	0.0905791	-2.03423	4.56264	5.01607
GFM2	All Targets	RNA	Endogenous	1	1	60	13	10.3944	1	1	84340	FALSE	0.989523	5.16764	-0.863593	5.04129	-4.49543	2.42262e-05	0.0118106	2.46772	4.83057	5.35738
NTM	All Targets	RNA	Endogenous	1	1	32	7.5	6.66051	1	1	50863	FALSE	0.033675	4.63514	-0.863433	4.446	-4.38705	3.54884e-05	0.014887	2.0737	4.21602	4.79098
NKX1-2	All Targets	RNA	Endogenous	1	1	65	17	11.225	1	1	390010	FALSE	0.667573	5.30061	-0.854134	5.16548	-4.68777	1.14962e-05	0.00864036	3.13931	5.11246	5.245
ANO3	All Targets	RNA	Endogenous	1	1	37	11	8.71446	1	1	63982	FALSE	0.491431	4.94921	-0.849742	4.79828	-4.53674	2.03453e-05	0.0111755	2.60121	4.59396	5.10477
SYT8	All Targets	RNA	Endogenous	1	1	135	23	16.7321	1	1	90019	FALSE	2.2826	5.79435	-0.847789	5.71129	-2.71951	0.0109677	0.1288	-2.83771	5.47621	6.06392
HSD17B1	All Targets	RNA	Endogenous	1	1	38	12	9.33174	1	1	3292	FALSE	0.315769	5.03888	-0.845824	4.90426	-4.59841	1.61334e-05	0.0099367	2.80778	4.69623	5.21631
OR52H1	All Targets	RNA	Endogenous	1	1	42	11.5	8.96592	1	1	390067	FALSE	0.246823	4.98042	-0.844808	4.83345	-4.76499	8.55577e-06	0.00806357	3.36757	4.58835	5.20111
GABRG2	All Targets	RNA	Endogenous	1	1	33	11	7.53787	1	1	2566	FALSE	0.859403	4.78363	-0.843203	4.61499	-4.06811	0.000113659	0.0212272	1.08042	4.43957	4.87813
WFDC11	All Targets	RNA	Endogenous	1	1	39	12	9.22725	1	1	259239	FALSE	-0.306652	5.02948	-0.842254	4.89225	-5.11246	2.20326e-06	0.00355952	4.59224	4.71486	5.15833
COMP	All Targets	RNA	Endogenous	1	1	102	8.5	8.94923	1	1	1311	FALSE	0.956616	4.98945	-0.840933	4.84759	-3.86278	0.000256749	0.0297811	0.380285	4.60186	5.21619
FRMD6	All Targets	RNA	Endogenous	1	1	42	13.5	9.38246	1	1	122786	FALSE	0.12262	5.04565	-0.834662	4.90534	-4.51571	2.20115e-05	0.0113441	2.53167	4.74356	5.14802
CCL24	All Targets	RNA	Endogenous	1	1	286	22.5	16.5313	1	1	6369	FALSE	1.79047	5.77861	-0.834549	5.68951	-3.85731	0.000373208	0.0336596	0.0861316	5.66685	5.72349
LONRF2	All Targets	RNA	Endogenous	1	1	53	12.5	9.23878	1	1	164832	FALSE	-0.20012	5.04563	-0.834303	4.8943	-4.58703	1.68405e-05	0.0099367	2.76377	4.72361	5.15033
FBLN5	All Targets	RNA	Endogenous	1	1	44	11	9.38613	1	1	10516	FALSE	-0.194963	5.03973	-0.832916	4.89925	-4.93992	4.34517e-06	0.00522521	3.97375	4.72304	5.16357
CX3CR1	All Targets	RNA	Endogenous	1	1	70	9	6.81629	1	1	1524	FALSE	0.842862	4.67816	-0.829046	4.49092	-4.10227	9.95009e-05	0.0201663	1.19601	4.42719	4.58651
HES4	All Targets	RNA	Endogenous	1	2	60	20.5	17.6977	1	1	57801	FALSE	0.637689	5.83573	-0.822922	5.75148	-4.70688	1.09437e-05	0.00858269	3.20423	5.59222	5.99037
LYPD4	All Targets	RNA	Endogenous	1	1	35	12	8.16374	1	1	147719	FALSE	0.574086	4.90374	-0.822696	4.73235	-4.20532	6.88149e-05	0.0174981	1.52786	4.59986	4.93108
COL3A1	All Targets	RNA	Endogenous	1	2	107	17.5	16.784	1	1	1281	FALSE	1.81123	5.77193	-0.82138	5.67605	-2.9728	0.00568058	0.097771	-2.27219	5.45963	6.00067
CCDC167	All Targets	RNA	Endogenous	1	1	38	10	7.47404	1	1	154467	FALSE	1.18209	4.80236	-0.820878	4.61797	-3.29549	0.00182765	0.0639724	-1.29449	4.38618	4.96564
NDN	All Targets	RNA	Endogenous	1	1	54	8.5	7.97147	1	1	4692	FALSE	0.667755	4.84531	-0.818995	4.68607	-4.04406	0.000122269	0.0212272	1.01531	4.45602	5.03113
ANXA6	All Targets	RNA	Endogenous	1	1	31	10	7.9728	1	1	309	FALSE	0.160088	4.85557	-0.818376	4.68487	-4.02173	0.000132271	0.0214946	0.941916	4.45911	5.02352
MAGEB4	All Targets	RNA	Endogenous	1	1	38	7	5.96654	1	1	4115	FALSE	-0.167813	4.52074	-0.817864	4.30922	-4.20173	6.97105e-05	0.0174981	1.48565	4.06157	4.68071
UNC5C	All Targets	RNA	Endogenous	1	1	38	12	7.14318	1	1	8633	FALSE	-0.292384	4.74091	-0.814106	4.55568	-4.17813	7.58857e-05	0.017549	1.42265	4.31888	4.91089
COL8A1	All Targets	RNA	Endogenous	1	1	32	10	8.76837	1	1	1295	FALSE	0.583187	4.95937	-0.813297	4.81096	-4.0669	0.000112794	0.0212272	1.08839	4.5777	5.16084
IER5L	All Targets	RNA	Endogenous	1	1	47	14	11.9881	1	1	389792	FALSE	1.39141	5.34068	-0.813125	5.21572	-3.6537	0.000584812	0.0395088	-0.322807	5.00241	5.53569
THOC5	All Targets	RNA	Endogenous	1	1	52	14	10.3496	1	1	8563	FALSE	0.141307	5.15001	-0.812129	5.02429	-4.36254	3.88375e-05	0.0156067	2.03788	4.78999	5.37573
TGM2	All Targets	RNA	Endogenous	1	5	385	32.5	31.0789	1	1	7052	FALSE	3.69162	6.60352	-0.808587	6.54143	-2.44464	0.0209643	0.170085	-3.44643	6.2375	6.99733
BPIFB6	All Targets	RNA	Endogenous	1	1	48	10	7.60806	1	1	128859	FALSE	0.60243	4.80367	-0.808281	4.63028	-4.1473	8.47455e-05	0.0184173	1.3391	4.49285	4.83643
PDE4B	All Targets	RNA	Endogenous	1	1	49	10.5	8.65453	1	1	5142	FALSE	0.190268	4.95834	-0.80739	4.79828	-4.25459	5.7592e-05	0.0170302	1.68901	4.75791	4.85882
KAZALD1	All Targets	RNA	Endogenous	1	1	37	11	9.75316	1	1	81621	FALSE	0.926112	5.09226	-0.806701	4.93721	-3.67571	0.000543152	0.0384987	-0.259794	4.8625	5.04927
CATSPERG	All Targets	RNA	Endogenous	1	1	59	14	9.88996	1	1	57828	FALSE	0.585512	5.126	-0.804693	4.99081	-4.19576	7.12261e-05	0.017549	1.50222	4.87911	5.15836
OXT	All Targets	RNA	Endogenous	1	1	47	14	11.1829	1	1	5020	FALSE	0.733745	5.24848	-0.804673	5.13135	-4.46188	2.6904e-05	0.0124889	2.37713	4.93488	5.42605
CRYM	All Targets	RNA	Endogenous	1	1	39	13	9.53568	1	1	1428	FALSE	0.746463	5.06185	-0.804102	4.92925	-4.74327	9.29916e-06	0.00806357	3.31471	4.75779	5.18643
SKOR1	All Targets	RNA	Endogenous	1	1	37	12	9.27885	1	1	390598	FALSE	0.611876	5.03946	-0.801665	4.90539	-4.5897	1.66721e-05	0.0099367	2.78956	4.76224	5.12011
ZNF443	All Targets	RNA	Endogenous	1	1	57	10	6.6733	1	1	10224	FALSE	1.25516	4.66482	-0.800433	4.47353	-3.682	0.000431744	0.0347056	-0.0852314	4.19165	4.89633
LIMD2	All Targets	RNA	Endogenous	1	1	43	12	9.68194	1	1	80774	FALSE	0.198587	5.07182	-0.7994	4.9371	-4.29438	4.98381e-05	0.0157528	1.813	4.77704	5.17718
HSPA1B	All Targets	RNA	Endogenous	1	2	484	33	30.3075	1	1	3304	FALSE	2.05408	6.56366	-0.799076	6.51233	-2.47619	0.0195071	0.165275	-3.40616	6.41236	6.66228
BAMBI	All Targets	RNA	Endogenous	1	1	75	12	11.1167	1	1	25805	FALSE	0.769614	5.25807	-0.798907	5.14107	-4.29208	5.02578e-05	0.0157528	1.81309	4.92068	5.47165
PPIL1	All Targets	RNA	Endogenous	1	1	53	8	6.09399	1	1	51645	FALSE	1.36909	4.55125	-0.798608	4.33739	-3.48714	0.000909374	0.0484103	-0.713251	4.28666	4.41349
SERPING1	All Targets	RNA	Endogenous	1	2	175	19.5	17.5781	1	1	710	FALSE	2.28562	5.83637	-0.795506	5.75217	-2.57865	0.0151783	0.148423	-3.09429	5.50611	6.12126
HSPA4L	All Targets	RNA	Endogenous	1	1	25	9	6.23809	1	1	22824	FALSE	0.302994	4.5713	-0.794676	4.36407	-4.21274	6.70009e-05	0.0174981	1.53436	4.18031	4.63971
FAM9C	All Targets	RNA	Endogenous	1	1	55	13	9.35678	1	1	171484	FALSE	1.01316	5.05697	-0.792821	4.90897	-3.71488	0.000410711	0.0346187	-0.0330281	4.79233	5.08391
ABI3BP	All Targets	RNA	Endogenous	1	1	37	10	7.88572	1	1	25890	FALSE	0.564253	4.84519	-0.785592	4.68635	-3.99369	0.000145942	0.0232965	0.86108	4.53317	4.91612
EIF4E3	All Targets	RNA	Endogenous	1	1	31	11.5	9.01773	1	1	317649	FALSE	-0.0738363	4.99291	-0.785105	4.84691	-4.53543	2.04453e-05	0.0111755	2.60913	4.76634	4.96778
SPOCK1	All Targets	RNA	Endogenous	1	1	36	10.5	7.36658	1	1	6695	FALSE	0.679704	4.76073	-0.784902	4.58437	-4.04335	0.000122576	0.0212272	1.01699	4.4615	4.76867
RMI2	All Targets	RNA	Endogenous	1	1	68	14.5	12.2815	1	1	116028	FALSE	0.80345	5.37289	-0.784538	5.25256	-4.3542	4.00455e-05	0.0156067	2.01689	5.17192	5.37351
COL6A3	All Targets	RNA	Endogenous	1	1	36	12.5	8.24057	1	1	1293	FALSE	0.522817	4.88584	-0.783687	4.7284	-4.0493	0.00012003	0.0212272	1.03531	4.57082	4.96477
EGF	All Targets	RNA	Endogenous	1	1	32	11	7.33351	1	1	1950	FALSE	0.397111	4.75074	-0.781345	4.58165	-4.24025	6.06617e-05	0.0173685	1.63134	4.43186	4.80633
TMEM207	All Targets	RNA	Endogenous	1	1	57	7.5	5.71259	1	1	131920	FALSE	1.32705	4.49229	-0.780908	4.26915	-3.02028	0.00396234	0.0856987	-1.94735	4.08003	4.55282
FAM131B	All Targets	RNA	Endogenous	1	1	38	13	8.43497	1	1	9715	FALSE	0.672308	4.92633	-0.780499	4.76819	-3.75137	0.000337759	0.0329324	0.127631	4.56968	5.06596
PRSS33	All Targets	RNA	Endogenous	1	1	41	8	6.9929	1	1	260429	FALSE	-0.335862	4.70893	-0.779817	4.51846	-3.86241	0.00023009	0.0278547	0.446535	4.35873	4.75806
PAPPA	All Targets	RNA	Endogenous	1	1	33	10.5	7.12222	1	1	5069	FALSE	0.479727	4.71534	-0.779571	4.54238	-4.14882	8.42871e-05	0.0184173	1.33917	4.34263	4.842
OBP2A	All Targets	RNA	Endogenous	1	1	47	13	9.83932	1	1	29991	FALSE	0.86911	5.09957	-0.777941	4.96157	-4.06166	0.000116287	0.0212272	1.07017	4.87077	5.09777
TOX2	All Targets	RNA	Endogenous	1	1	34	10	8.03793	1	1	84969	FALSE	0.397789	4.85531	-0.777645	4.69456	-4.05043	0.000119554	0.0212272	1.03661	4.5288	4.9432
CD300A	All Targets	RNA	Endogenous	1	1	32	11	8.64021	1	1	11314	FALSE	-0.0673373	4.95003	-0.773599	4.79508	-4.58333	1.70772e-05	0.0099367	2.7703	4.68091	4.96633
ATP4A	All Targets	RNA	Endogenous	1	1	38	10	7.8065	1	1	495	FALSE	0.29715	4.82897	-0.772378	4.66143	-3.88559	0.000212451	0.0268201	0.533073	4.54446	4.83687
OR6B1	All Targets	RNA	Endogenous	1	1	34	11.5	8.86338	1	1	135946	FALSE	1.09716	4.98939	-0.771744	4.834	-3.89354	0.000206708	0.0268201	0.557941	4.59686	5.1897
ISL1	All Targets	RNA	Endogenous	1	1	37	11.5	8.31984	1	1	3670	FALSE	-0.318565	4.89741	-0.770874	4.74642	-4.62049	1.48415e-05	0.0099367	2.89127	4.59445	4.97438
ZNF738	All Targets	RNA	Endogenous	1	1	54	10.5	8.05189	1	1	148203	FALSE	0.937016	4.86342	-0.770573	4.69803	-3.56179	0.000652293	0.0421603	-0.439718	4.61827	4.81766
MTMR7	All Targets	RNA	Endogenous	1	1	32	10	7.76802	1	1	9108	FALSE	0.103382	4.81228	-0.770496	4.64826	-4.18343	7.44538e-05	0.017549	1.45013	4.45373	4.94006
CDX4	All Targets	RNA	Endogenous	1	1	36	11.5	7.25839	1	1	1046	FALSE	0.600213	4.75357	-0.768154	4.57628	-3.94664	0.000171978	0.0247202	0.718074	4.46052	4.74993
LRRC19	All Targets	RNA	Endogenous	1	1	36	11	7.68031	1	1	64922	FALSE	0.413636	4.82389	-0.767701	4.65513	-3.98157	0.00015226	0.023325	0.817134	4.46578	4.93916
KRT13	All Targets	RNA	Endogenous	1	1	105	11	8.71572	1	1	3860	FALSE	1.70206	4.96674	-0.763531	4.81302	-2.34009	0.0261574	0.186788	-3.51136	4.52213	5.24936
GPR19	All Targets	RNA	Endogenous	1	1	52	11	9.29046	1	1	2842	FALSE	0.680841	5.05167	-0.76249	4.90918	-3.88334	0.000214109	0.0268201	0.527562	4.70473	5.21585
RASD2	All Targets	RNA	Endogenous	1	1	34	8	6.68395	1	1	23551	FALSE	0.408535	4.65108	-0.759606	4.45457	-3.82161	0.000264595	0.0297811	0.338001	4.34229	4.62299
CNEP1R1	All Targets	RNA	Endogenous	1	1	37	10	7.86674	1	1	255919	FALSE	-0.0654586	4.82509	-0.75937	4.6606	-3.82616	0.000260516	0.0297811	0.350492	4.49714	4.90579
PIK3R5	All Targets	RNA	Endogenous	1	1	62	9	7.63322	1	1	23533	FALSE	0.673958	4.80871	-0.756132	4.62828	-4.11966	9.35332e-05	0.0198488	1.25865	4.55517	4.73795
C2CD3	All Targets	RNA	Endogenous	1	1	89	9	7.09539	1	1	26005	FALSE	1.31673	4.71565	-0.755979	4.53736	-3.43662	0.00106344	0.0521259	-0.853562	4.50914	4.57969
PRKCG	All Targets	RNA	Endogenous	1	1	86	12	11.2519	1	1	5582	FALSE	0.161877	5.26042	-0.755212	5.1383	-3.68913	0.000424621	0.0347056	-0.0694667	4.94455	5.42891
MMP2	All Targets	RNA	Endogenous	1	1	30	9.5	8.29523	1	1	4313	FALSE	0.417016	4.89911	-0.755094	4.74143	-3.77971	0.000305134	0.0313274	0.213708	4.40727	5.24268
SLC4A3	All Targets	RNA	Endogenous	1	1	36	10.5	8.02513	1	1	6508	FALSE	0.382959	4.8657	-0.754373	4.70066	-3.88437	0.000213349	0.0268201	0.527088	4.54021	4.94133
SPNS2	All Targets	RNA	Endogenous	1	1	55	11	10.426	1	1	124976	FALSE	-0.206781	5.16568	-0.754042	5.04169	-4.02795	0.000129407	0.0214422	0.971892	4.82864	5.36127
GGTA1	All Targets	RNA	Endogenous	1	1	38	10	8.04044	1	1	2681	FALSE	-0.0608207	4.86521	-0.752822	4.69629	-4.20433	6.90607e-05	0.0174981	1.52706	4.69335	4.70071
VCAN	All Targets	RNA	Endogenous	1	1	200	14.5	14.6094	1	1	1462	FALSE	2.34783	5.61689	-0.752341	5.50631	-3.06025	0.00382159	0.0844777	-1.93471	5.24115	5.90407
NDRG2	All Targets	RNA	Endogenous	1	1	55	13.5	10.7147	1	1	57447	FALSE	0.280995	5.20949	-0.751388	5.07998	-4.17993	7.53968e-05	0.017549	1.45245	4.93506	5.29735
SMYD1	All Targets	RNA	Endogenous	1	1	30	8	6.7406	1	1	150572	FALSE	-0.0640278	4.65486	-0.751296	4.47038	-3.71241	0.000382916	0.034039	0.0123001	4.24637	4.80641
PER3	All Targets	RNA	Endogenous	1	1	60	11	8.22038	1	1	8863	FALSE	-0.172008	4.88374	-0.749677	4.72262	-3.84566	0.000243701	0.0290056	0.410992	4.54753	4.98525
SCGB1A1	All Targets	RNA	Endogenous	1	1	41	9.5	7.77717	1	1	7356	FALSE	0.881806	4.83344	-0.749219	4.66183	-3.71435	0.000389755	0.034039	0.00465384	4.6352	4.70177
PIP	All Targets	RNA	Endogenous	1	1	39	12	9.17965	1	1	5304	FALSE	-0.297918	5.01319	-0.747626	4.87159	-4.34485	4.14437e-05	0.0156067	1.97961	4.78874	4.99587
IGFBP5	All Targets	RNA	Endogenous	1	1	57	13.5	10.0793	1	1	3488	FALSE	1.00562	5.12127	-0.745225	4.98672	-3.20977	0.00236658	0.0706357	-1.53331	4.84999	5.19181
NOVA1	All Targets	RNA	Endogenous	1	1	35	12.5	8.3717	1	1	4857	FALSE	-0.129382	4.90929	-0.74273	4.75707	-4.2012	6.9845e-05	0.0174981	1.51099	4.62363	4.95724
FADS2	All Targets	RNA	Endogenous	1	1	36	13	8.70101	1	1	9415	FALSE	0.356497	4.94814	-0.74271	4.79644	-3.96979	0.000158656	0.0234407	0.790686	4.73473	4.889
SYDE1	All Targets	RNA	Endogenous	1	1	69	10.5	8.71122	1	1	85360	FALSE	-0.0976453	4.95214	-0.741236	4.80126	-3.9432	0.000174047	0.0247202	0.708589	4.66465	5.00617
TCEA2	All Targets	RNA	Endogenous	1	2	50	12	12.1511	1	1	6919	FALSE	0.190297	5.34954	-0.74105	5.22779	-3.77767	0.000312964	0.0313625	0.195402	5.04667	5.49947
AKR1C4	All Targets	RNA	Endogenous	1	1	99	9.5	8.11701	1	1	1109	FALSE	1.28251	4.87835	-0.74053	4.7185	-3.3291	0.00147876	0.0581616	-1.1377	4.75307	4.66664
PDE11A	All Targets	RNA	Endogenous	1	1	78	7.5	7.41514	1	1	50940	FALSE	0.678268	4.76436	-0.739847	4.58671	-3.25088	0.00180952	0.0639029	-1.3092	4.43782	4.81003
LRRC14B	All Targets	RNA	Endogenous	1	1	28	9.5	6.98739	1	1	389257	FALSE	0.267837	4.70138	-0.739776	4.5164	-3.68448	0.000420454	0.0347056	-0.0638266	4.36057	4.75016
MEIOC	All Targets	RNA	Endogenous	1	1	54	10	8.42747	1	1	284071	FALSE	0.502311	4.90781	-0.737503	4.75697	-4.22465	6.41819e-05	0.0174981	1.59326	4.71969	4.8129
ZSCAN30	All Targets	RNA	Endogenous	1	1	31	9.5	7.41222	1	1	100101467	FALSE	0.475144	4.76172	-0.737369	4.5917	-3.7674	0.000318135	0.0317045	0.179358	4.45821	4.79194
OR4K1	All Targets	RNA	Endogenous	1	1	32	10.5	7.49848	1	1	79544	FALSE	0.453272	4.79296	-0.7368	4.62111	-3.93807	0.000177176	0.024968	0.68829	4.42005	4.92269
TFDP3	All Targets	RNA	Endogenous	1	1	60	13	8.33155	1	1	51270	FALSE	0.51366	4.91785	-0.733661	4.7614	-3.7931	0.000291579	0.0307573	0.256218	4.6241	4.96735
RMI1	All Targets	RNA	Endogenous	1	1	30	11	8.36063	1	1	80010	FALSE	-0.0675284	4.89475	-0.732833	4.7344	-3.72179	0.000371048	0.0336596	0.0440388	4.55225	5.00763
FCRL4	All Targets	RNA	Endogenous	1	1	34	11	9.21998	1	1	83417	FALSE	-0.214336	5.02045	-0.732537	4.87571	-4.10553	9.83572e-05	0.0201663	1.21257	4.76251	5.04552
CLEC4E	All Targets	RNA	Endogenous	1	1	43	11.5	8.89292	1	1	26253	FALSE	0.256115	4.97719	-0.732202	4.83694	-4.08246	0.000106748	0.0207647	1.13884	4.69247	5.05363
STPG2	All Targets	RNA	Endogenous	1	1	29	10.5	8.28939	1	1	285555	FALSE	0.605247	4.8976	-0.731378	4.74457	-3.70071	0.000398235	0.0340444	-0.0164055	4.55142	5.0343
STXBP5L	All Targets	RNA	Endogenous	1	1	29	8	6.28257	1	1	9515	FALSE	1.16947	4.59033	-0.731239	4.38531	-3.37524	0.00116496	0.0543939	-0.940843	4.23316	4.61353
VSTM2L	All Targets	RNA	Endogenous	1	1	130	13	10.3311	1	1	128434	FALSE	1.52667	5.16976	-0.730383	5.03747	-3.38585	0.00123793	0.0556764	-0.989606	4.7846	5.41677
C3orf18	All Targets	RNA	Endogenous	1	1	48	8	5.93725	1	1	51161	FALSE	1.19989	4.51335	-0.729682	4.29709	-3.54576	0.000669867	0.0424334	-0.467578	4.25855	4.35491
COL14A1	All Targets	RNA	Endogenous	1	1	46	11	8.12501	1	1	7373	FALSE	0.636023	4.87644	-0.728257	4.71472	-3.77358	0.000311544	0.0313625	0.197747	4.5278	4.99511
HSPBAP1	All Targets	RNA	Endogenous	1	1	77	13	8.94947	1	1	79663	FALSE	-0.183792	4.98502	-0.728196	4.84692	-3.8448	0.00024442	0.0290056	0.4112	4.6759	5.10344
PLCD1	All Targets	RNA	Endogenous	1	1	48	11	8.67826	1	1	5333	FALSE	-0.300931	4.94952	-0.726926	4.79935	-3.91938	0.000189043	0.0257511	0.634735	4.65516	5.01564
HSPA12B	All Targets	RNA	Endogenous	1	1	33	9	6.94663	1	1	116835	FALSE	0.668111	4.69203	-0.726626	4.509	-3.70838	0.000388128	0.034039	0.00541045	4.35115	4.74576
UGT2B10	All Targets	RNA	Endogenous	1	1	30	11	7.23197	1	1	7365	FALSE	0.434115	4.74357	-0.726167	4.56253	-3.41902	0.00100104	0.050579	-0.811186	4.35307	4.87672
PHACTR1	All Targets	RNA	Endogenous	1	1	29	14	8.60537	1	1	221692	FALSE	0.381067	4.93521	-0.725198	4.7877	-3.82506	0.000261491	0.0297811	0.351602	4.63555	5.01593
PDGFC	All Targets	RNA	Endogenous	1	1	48	13	10.3718	1	1	56034	FALSE	-0.139718	5.16305	-0.724166	5.03016	-4.0916	0.000103346	0.0207129	1.17394	4.95154	5.14809
RTN1	All Targets	RNA	Endogenous	1	1	35	10	7.59389	1	1	6252	FALSE	0.351816	4.80638	-0.723831	4.63008	-3.72789	0.000363506	0.0334836	0.0626998	4.46422	4.87887
CA7	All Targets	RNA	Endogenous	1	1	33	9	6.78675	1	1	766	FALSE	0.515948	4.6603	-0.723532	4.47099	-3.6049	0.000547573	0.0384987	-0.292823	4.35173	4.64988
CADM2	All Targets	RNA	Endogenous	1	1	34	6.5	5.68444	1	1	253559	FALSE	-0.010973	4.46759	-0.722626	4.24265	-3.55613	0.0006427	0.0418521	-0.432288	4.11978	4.42695
DOK6	All Targets	RNA	Endogenous	1	1	57	14.5	10.867	1	1	220164	FALSE	0.672848	5.24934	-0.722587	5.1182	-4.4609	2.70023e-05	0.0124889	2.37653	5.06098	5.20403
PATZ1	All Targets	RNA	Endogenous	1	1	44	13	9.92573	1	1	23598	FALSE	0.676218	5.11258	-0.722375	4.97702	-3.53514	0.000707635	0.0437576	-0.515856	4.87097	5.13608
SCN4B	All Targets	RNA	Endogenous	1	1	21	5	5.13926	1	1	6330	FALSE	0.5889	4.34885	-0.72174	4.1076	-3.17872	0.00212031	0.0674207	-1.44546	3.93359	4.36861
ZNF429	All Targets	RNA	Endogenous	1	1	42	12.5	8.47517	1	1	353088	FALSE	0.131282	4.92972	-0.719961	4.77997	-4.24134	6.04232e-05	0.0173685	1.64364	4.65814	4.96272
EPB41L4A	All Targets	RNA	Endogenous	1	1	59	15.5	12.5311	1	1	64097	FALSE	0.693468	5.40863	-0.71938	5.29787	-3.38769	0.00117304	0.0543939	-0.947681	5.00993	5.72979
IRGM	All Targets	RNA	Endogenous	1	1	62	8	7.79257	1	1	345611	FALSE	-0.0458287	4.82983	-0.719085	4.65602	-3.80049	0.000284341	0.0307159	0.277191	4.50836	4.8775
TMC2	All Targets	RNA	Endogenous	1	1	31	10	7.19766	1	1	117532	FALSE	-0.10821	4.72386	-0.719009	4.55294	-3.91526	0.00019176	0.0257802	0.618494	4.38037	4.81179
MT4	All Targets	RNA	Endogenous	1	1	36	9.5	7.65934	1	1	84560	FALSE	0.108321	4.81835	-0.717267	4.63643	-3.61481	0.000529948	0.0384987	-0.264533	4.48058	4.8702
AFMID	All Targets	RNA	Endogenous	1	1	103	14	10.2452	1	1	125061	FALSE	0.447833	5.16446	-0.717219	5.03422	-3.7793	0.000305564	0.0313274	0.213585	4.99927	5.08664
CLC	All Targets	RNA	Endogenous	1	1	87	12	9.06603	1	1	1178	FALSE	0.67304	5.02542	-0.716415	4.8785	-3.30246	0.00155591	0.0594609	-1.18777	4.71224	5.12789
GLT6D1	All Targets	RNA	Endogenous	1	1	28	6.5	6.35997	1	1	360203	FALSE	0.0222099	4.5777	-0.714816	4.37876	-3.58013	0.000594086	0.0395552	-0.363607	4.24262	4.58296
POMT1	All Targets	RNA	Endogenous	1	1	34	12	9.31881	1	1	10585	FALSE	0.351704	5.02603	-0.713397	4.88585	-3.91879	0.000189433	0.0257511	0.634798	4.77291	5.05527
SPANXN4	All Targets	RNA	Endogenous	1	1	49	11	8.37748	1	1	441525	FALSE	0.654468	4.90989	-0.712701	4.75271	-3.51571	0.000733185	0.0440839	-0.54695	4.68203	4.85873
CDC20	All Targets	RNA	Endogenous	1	1	59	12	9.44383	1	1	991	FALSE	0.413688	5.05946	-0.712578	4.91883	-3.58003	0.000594271	0.0395552	-0.365089	4.73162	5.19965
SHANK3	All Targets	RNA	Endogenous	1	1	33	12	9.13394	1	1	85358	FALSE	-0.10265	5.00225	-0.712536	4.86753	-3.97069	0.000158159	0.0234407	0.793293	4.70168	5.1163
CCPG1	All Targets	RNA	Endogenous	1	1	45	10	7.3208	1	1	9236	FALSE	0.847347	4.75272	-0.712259	4.57077	-2.58247	0.0134579	0.139754	-2.96323	4.3631	4.88227
VWA1	All Targets	RNA	Endogenous	1	1	36	12.5	9.38154	1	1	64856	FALSE	0.378868	5.04159	-0.711913	4.90174	-3.7788	0.000306083	0.0313274	0.213766	4.72209	5.17122
IGHG1	All Targets	RNA	Endogenous	1	4	128	21.5	22.5184	1	1	3500	FALSE	1.31085	6.15812	-0.710397	6.08351	-3.0425	0.0044816	0.0905791	-2.12005	5.98445	6.23211
HMCN2	All Targets	RNA	Endogenous	1	1	32	10	7.99668	1	1	256158	FALSE	0.443669	4.86428	-0.71028	4.69384	-3.70556	0.000391816	0.034039	-0.00227829	4.55743	4.89845
ADPRHL1	All Targets	RNA	Endogenous	1	1	113	11	8.62392	1	1	113622	FALSE	0.912962	4.93346	-0.710064	4.78157	-3.61404	0.000531474	0.0384987	-0.270048	4.76435	4.8074
KCNJ6	All Targets	RNA	Endogenous	1	1	42	11	8.31173	1	1	3763	FALSE	-0.0596825	4.89928	-0.709925	4.74563	-3.82026	0.000265814	0.0297811	0.336705	4.5816	4.99169
TRPV5	All Targets	RNA	Endogenous	1	1	32	10	7.58207	1	1	56302	FALSE	0.24735	4.7894	-0.709882	4.62671	-3.62534	0.000511828	0.0375299	-0.23432	4.48717	4.83602
GLT8D2	All Targets	RNA	Endogenous	1	1	44	12.5	9.60743	1	1	83468	FALSE	-0.369266	5.07543	-0.708989	4.94	-4.12433	9.19884e-05	0.0197534	1.27102	4.78362	5.17458
DLEC1	All Targets	RNA	Endogenous	1	1	42	13	8.46909	1	1	9940	FALSE	-0.0298415	4.92022	-0.70859	4.76892	-3.77753	0.000307404	0.0313274	0.209861	4.64112	4.96061
TEKT4	All Targets	RNA	Endogenous	1	1	31	10	7.94925	1	1	150483	FALSE	-0.167497	4.8464	-0.708063	4.68197	-3.9062	0.000197866	0.025863	0.596034	4.56695	4.8545
TSSK1B	All Targets	RNA	Endogenous	1	1	76	12	7.66288	1	1	83942	FALSE	1.00656	4.82367	-0.707481	4.65245	-2.66027	0.011271	0.12966	-2.83722	4.66174	4.63851
KCNT1	All Targets	RNA	Endogenous	1	1	38	9.5	7.406	1	1	57582	FALSE	0.705723	4.77156	-0.706945	4.599	-3.67309	0.000436754	0.0347056	-0.096631	4.42804	4.85544
IRAG1	All Targets	RNA	Endogenous	1	1	57	11	7.83935	1	1	10335	FALSE	0.359813	4.82562	-0.704879	4.65511	-3.55703	0.000640807	0.0418521	-0.429629	4.50847	4.87506
IL2RB	All Targets	RNA	Endogenous	1	1	78	12	8.45494	1	1	3560	FALSE	0.323785	4.94777	-0.704785	4.78117	-3.58083	0.000592722	0.0395552	-0.361642	4.59326	5.06304
ZNF560	All Targets	RNA	Endogenous	1	1	34	11.5	8.26256	1	1	147741	FALSE	0.035381	4.89572	-0.703799	4.73727	-3.96533	0.00016114	0.0234407	0.777913	4.6027	4.93912
PHLDB1	All Targets	RNA	Endogenous	1	1	28	11	9.78579	1	1	23187	FALSE	0.439376	5.08896	-0.702511	4.94592	-3.50658	0.000755255	0.0451102	-0.573507	4.79525	5.17193
MGAT4C	All Targets	RNA	Endogenous	1	1	25	8.5	6.26301	1	1	25834	FALSE	0.822109	4.58893	-0.702399	4.38882	-3.55059	0.000654445	0.0421603	-0.446714	4.14125	4.76018
ST8SIA1	All Targets	RNA	Endogenous	1	1	47	8	5.8568	1	1	6489	FALSE	0.79609	4.50899	-0.701153	4.29163	-3.01023	0.00380232	0.08421	-1.93702	4.25408	4.34797
C1orf53	All Targets	RNA	Endogenous	1	1	34	10.5	8.43869	1	1	388722	FALSE	0.190881	4.90953	-0.701105	4.75247	-3.63777	0.000491183	0.0370709	-0.198955	4.51764	5.10473
DSG3	All Targets	RNA	Endogenous	1	1	53	12.5	9.14442	1	1	1830	FALSE	1.62882	5.03799	-0.700621	4.89498	-3.52257	0.00072668	0.043839	-0.542645	4.70779	5.17577
GALNTL6	All Targets	RNA	Endogenous	1	1	50	12	7.81052	1	1	442117	FALSE	0.790215	4.83361	-0.700261	4.66795	-3.51468	0.000735862	0.0440979	-0.55236	4.55539	4.83679
OR52A1	All Targets	RNA	Endogenous	1	1	42	13	9.50206	1	1	23538	FALSE	0.0674149	5.06266	-0.699595	4.9219	-3.72789	0.000363507	0.0334836	0.0631394	4.81592	5.08087
CSF1R	All Targets	RNA	Endogenous	1	1	40	11	8.24041	1	1	1436	FALSE	0.0396506	4.89307	-0.699148	4.73439	-3.77961	0.000305235	0.0313274	0.215899	4.53799	5.02897
GPR149	All Targets	RNA	Endogenous	1	1	41	10	7.91645	1	1	344758	FALSE	-0.0348343	4.84774	-0.699019	4.68177	-3.8369	0.000251119	0.0296058	0.385822	4.51115	4.9377
MAPK11	All Targets	RNA	Endogenous	1	1	33	8.5	6.70355	1	1	5600	FALSE	0.514704	4.6594	-0.698121	4.4625	-3.80351	0.000281428	0.0307159	0.285242	4.27968	4.73673
GCNA	All Targets	RNA	Endogenous	1	1	23	8.5	6.46543	1	1	93953	FALSE	0.819425	4.60595	-0.697381	4.40399	-3.32844	0.0013336	0.0569767	-1.05847	4.2823	4.58654
INSM1	All Targets	RNA	Endogenous	1	1	56	9	6.67336	1	1	3642	FALSE	0.786437	4.6788	-0.696964	4.46714	-3.79424	0.000290446	0.0307573	0.259311	4.40566	4.55937
IGSF11	All Targets	RNA	Endogenous	1	1	47	11.5	9.02427	1	1	152404	FALSE	0.628947	4.99866	-0.696782	4.8595	-3.72923	0.000361877	0.0334836	0.0671405	4.68233	5.12525
GYPC	All Targets	RNA	Endogenous	1	1	134	37.5	23.3259	1	1	2995	FALSE	0.109375	6.23809	-0.696697	6.17184	-3.22784	0.0023573	0.0706357	-1.55936	5.95874	6.49149
ARL14EPL	All Targets	RNA	Endogenous	1	1	33	10.5	7.55176	1	1	644100	FALSE	0.183053	4.79176	-0.696487	4.6226	-3.49657	0.000780142	0.0458378	-0.602425	4.53614	4.75229
KCNG2	All Targets	RNA	Endogenous	1	1	48	15.5	11.2925	1	1	26251	FALSE	0.478164	5.29345	-0.695991	5.17489	-3.99034	0.000147663	0.023325	0.85677	5.07032	5.33175
MOGAT1	All Targets	RNA	Endogenous	1	1	74	12	9.94275	1	1	116255	FALSE	0.600717	5.12875	-0.695882	4.97884	-3.44337	0.000929947	0.0486214	-0.754485	4.83024	5.20174
OR10R2	All Targets	RNA	Endogenous	1	1	29	9.5	7.32147	1	1	343406	FALSE	0.256226	4.76398	-0.694417	4.57491	-3.10608	0.00276019	0.0747571	-1.6733	4.42007	4.80717
LENG9	All Targets	RNA	Endogenous	1	1	45	14	11.2973	1	1	94059	FALSE	-0.354393	5.25873	-0.694239	5.14084	-3.98283	0.000151589	0.023325	0.83356	5.04451	5.28533
C9orf129	All Targets	RNA	Endogenous	1	1	39	12	8.40334	1	1	445577	FALSE	1.04966	4.91434	-0.693294	4.7609	-3.04155	0.00358738	0.0823271	-1.89495	4.6323	4.95381
TIMM8A	All Targets	RNA	Endogenous	1	1	30	10.5	8.82821	1	1	1678	FALSE	-0.0958244	4.96573	-0.692659	4.81429	-3.75232	0.00033477	0.0329324	0.135307	4.67391	5.02485
ARSI	All Targets	RNA	Endogenous	1	1	61	12	8.41389	1	1	340075	FALSE	0.0442589	4.92107	-0.691626	4.76617	-3.70978	0.000386315	0.034039	0.00981945	4.60548	5.0072
SLC26A7	All Targets	RNA	Endogenous	1	1	41	12	8.69239	1	1	115111	FALSE	0.0842307	4.96908	-0.691564	4.82281	-3.96807	0.000159609	0.0234407	0.784882	4.64751	5.08576
RARB	All Targets	RNA	Endogenous	1	1	57	13	10.4876	1	1	5915	FALSE	-0.207831	5.18521	-0.690934	5.05927	-3.82593	0.000260714	0.0297811	0.354319	4.88127	5.32626
MS4A6A	All Targets	RNA	Endogenous	1	1	41	11	8.84241	1	1	64231	FALSE	0.443031	4.97757	-0.690727	4.83188	-3.82387	0.000262559	0.0297811	0.348367	4.72747	4.98849
USH1G	All Targets	RNA	Endogenous	1	1	24	10	6.91159	1	1	124590	FALSE	0.0737312	4.68602	-0.690635	4.49874	-3.56159	0.000631306	0.0414962	-0.415697	4.38562	4.66841
ZFP42	All Targets	RNA	Endogenous	1	1	40	8	5.49653	1	1	132625	FALSE	0.3314	4.46879	-0.69018	4.21858	-3.58741	0.000580041	0.0393338	-0.342689	3.99401	4.55544
COA7	All Targets	RNA	Endogenous	1	1	39	10.5	7.9326	1	1	65260	FALSE	-0.411972	4.8434	-0.69015	4.67773	-3.67387	0.000435622	0.0347056	-0.0945331	4.57135	4.83731
DIRAS1	All Targets	RNA	Endogenous	1	1	43	12	7.85404	1	1	148252	FALSE	0.423277	4.84171	-0.689918	4.67793	-3.58321	0.000588099	0.0395552	-0.354755	4.47321	4.98501
LDOC1	All Targets	RNA	Endogenous	1	1	36	12	9.84891	1	1	23641	FALSE	0.541917	5.09571	-0.689445	4.9483	-2.94794	0.00482946	0.0934936	-2.14468	4.77044	5.21508
VSTM1	All Targets	RNA	Endogenous	1	1	90	15	9.22803	1	1	284415	FALSE	0.525291	5.03406	-0.68922	4.89687	-3.54212	0.000672799	0.0424334	-0.474908	4.72371	5.1566
ARHGEF6	All Targets	RNA	Endogenous	1	1	43	8	7.17033	1	1	9459	FALSE	0.501567	4.73725	-0.688162	4.5595	-3.40656	0.00104163	0.0515851	-0.850679	4.5056	4.64035
DAGLA	All Targets	RNA	Endogenous	1	1	44	12	9.1039	1	1	747	FALSE	0.157857	5.00515	-0.688006	4.86219	-3.67621	0.000432235	0.0347056	-0.0878429	4.73835	5.04796
CCDC42	All Targets	RNA	Endogenous	1	1	36	10	6.63997	1	1	146849	FALSE	0.447106	4.6457	-0.687801	4.45621	-3.41156	0.00102516	0.0510824	-0.832724	4.25364	4.76007
LRRC71	All Targets	RNA	Endogenous	1	1	27	8	6.30113	1	1	149499	FALSE	0.248161	4.57143	-0.687689	4.37054	-3.36383	0.00119289	0.0543939	-0.962092	4.21138	4.60928
KRTAP17-1	All Targets	RNA	Endogenous	1	1	41	12	7.84828	1	1	83902	FALSE	0.369616	4.83407	-0.687514	4.67222	-3.59822	0.000559763	0.0389846	-0.311887	4.48177	4.9579
NEK10	All Targets	RNA	Endogenous	1	1	31	9.5	7.23941	1	1	152110	FALSE	0.354718	4.73379	-0.687324	4.5537	-3.50229	0.000765813	0.0453505	-0.582728	4.39709	4.78862
ALPK3	All Targets	RNA	Endogenous	1	1	40	10	9.25155	1	1	57538	FALSE	0.659691	5.01991	-0.687324	4.86831	-3.63822	0.000490446	0.0370709	-0.197343	4.67158	5.16341
UNC79	All Targets	RNA	Endogenous	1	1	33	11	8.58595	1	1	57578	FALSE	-0.0578666	4.93378	-0.686862	4.78106	-3.74381	0.000344531	0.0333476	0.109878	4.59041	5.06704
SPACA4	All Targets	RNA	Endogenous	1	1	58	15.5	10.7509	1	1	171169	FALSE	0.449745	5.20828	-0.686808	5.09325	-3.80315	0.000281777	0.0307159	0.285394	4.91832	5.35564
ZBTB14	All Targets	RNA	Endogenous	1	1	43	8	6.90292	1	1	7541	FALSE	0.118448	4.69017	-0.686658	4.4952	-3.46927	0.000852043	0.0476519	-0.673897	4.3917	4.65046
OTOP2	All Targets	RNA	Endogenous	1	1	21	6.5	5.95954	1	1	92736	FALSE	-0.254433	4.52389	-0.686364	4.30096	-3.10365	0.00266079	0.0736142	-1.63719	4.06386	4.6566
C7orf57	All Targets	RNA	Endogenous	1	1	44	10.5	9.37887	1	1	136288	FALSE	0.0632546	5.04488	-0.686002	4.9057	-3.80045	0.000284375	0.0307159	0.278168	4.75184	5.13648
SALL1	All Targets	RNA	Endogenous	1	1	55	12.5	8.58528	1	1	6299	FALSE	0.0939158	4.94708	-0.685711	4.79761	-3.44854	0.000910778	0.0484103	-0.737056	4.6434	5.02892
ISM2	All Targets	RNA	Endogenous	1	1	48	12	9.45373	1	1	145501	FALSE	0.136498	5.05966	-0.685546	4.92266	-3.72955	0.000361483	0.0334836	0.0680796	4.78134	5.13463
VSNL1	All Targets	RNA	Endogenous	1	1	46	16	11.4073	1	1	7447	FALSE	0.0706846	5.2795	-0.685504	5.15612	-3.87795	0.000218121	0.0269485	0.509954	5.04341	5.32517
PDILT	All Targets	RNA	Endogenous	1	1	38	13	9.64767	1	1	204474	FALSE	-0.180067	5.0788	-0.685301	4.94652	-3.88708	0.000211364	0.0268201	0.539154	4.82916	5.12256
KCND3	All Targets	RNA	Endogenous	1	1	37	11	8.38339	1	1	3752	FALSE	0.865597	4.90612	-0.684612	4.75669	-3.63855	0.000489908	0.0370709	-0.197146	4.57935	5.02269
RSPH6A	All Targets	RNA	Endogenous	1	1	26	9.5	6.50947	1	1	81492	FALSE	0.272171	4.62395	-0.683889	4.43226	-3.52014	0.000722711	0.0437855	-0.532383	4.24806	4.70856
CNTN6	All Targets	RNA	Endogenous	1	1	34	10	7.19908	1	1	27255	FALSE	0.712236	4.74366	-0.68294	4.56059	-3.11888	0.00259149	0.0732488	-1.62389	4.34512	4.88381
SLC38A7	All Targets	RNA	Endogenous	1	1	29	10.5	7.70646	1	1	55238	FALSE	0.673265	4.80683	-0.682759	4.6413	-3.61959	0.000521657	0.0380957	-0.253042	4.57717	4.7375
PRR23B	All Targets	RNA	Endogenous	1	1	38	10	8.77507	1	1	389151	FALSE	0.0365749	4.96428	-0.682611	4.81761	-3.7503	0.000337063	0.0329324	0.129067	4.61115	5.12731
MBNL3	All Targets	RNA	Endogenous	1	1	65	14.5	11.0491	1	1	55796	FALSE	0.793856	5.2568	-0.682436	5.12267	-3.47961	0.000842159	0.0476519	-0.675121	5.07589	5.19285
MYLK3	All Targets	RNA	Endogenous	1	1	38	11	8.28008	1	1	91807	FALSE	0.672714	4.91495	-0.6818	4.75252	-3.30473	0.00143901	0.0581616	-1.12841	4.59142	4.99418
FAM151A	All Targets	RNA	Endogenous	1	1	30	7.5	6.29933	1	1	338094	FALSE	-0.41172	4.55822	-0.681358	4.3672	-3.54266	0.000671615	0.0424334	-0.469684	4.18769	4.63645
TMEM119	All Targets	RNA	Endogenous	1	1	39	12	8.94735	1	1	338773	FALSE	0.896971	4.99525	-0.680873	4.85229	-3.54323	0.000670363	0.0424334	-0.473731	4.68476	5.10357
ULBP2	All Targets	RNA	Endogenous	1	1	27	9	8.02912	1	1	80328	FALSE	0.162721	4.8527	-0.680549	4.68146	-3.26959	0.00160515	0.0600941	-1.22062	4.5535	4.87339
KLHDC8B	All Targets	RNA	Endogenous	1	1	45	13.5	10.2834	1	1	200942	FALSE	0.23046	5.15243	-0.679981	5.02615	-3.73826	0.000351033	0.0334836	0.0936858	4.87539	5.25229
CCER1	All Targets	RNA	Endogenous	1	1	36	10.5	7.17066	1	1	196477	FALSE	0.293487	4.72361	-0.679891	4.54377	-3.42579	0.000979642	0.049637	-0.793222	4.30369	4.90389
SERPINA2	All Targets	RNA	Endogenous	1	1	76	8.5	7.19657	1	1	390502	FALSE	0.760364	4.73615	-0.678086	4.55275	-2.96373	0.00418371	0.088161	-2.02043	4.33769	4.87533
KCNE2	All Targets	RNA	Endogenous	1	1	48	15	10.0379	1	1	9992	FALSE	0.255372	5.13004	-0.678068	4.99416	-3.43013	0.000966135	0.0492292	-0.78928	4.80099	5.2839
DDR2	All Targets	RNA	Endogenous	1	1	36	11.5	7.88826	1	1	4921	FALSE	0.275159	4.84413	-0.677754	4.67685	-3.27437	0.00157938	0.0598504	-1.20729	4.49523	4.94926
TNFSF14	All Targets	RNA	Endogenous	1	1	46	11	11.3032	1	1	8740	FALSE	0.351753	5.26949	-0.677327	5.14027	-3.73776	0.000351629	0.0334836	0.0901501	5.12739	5.1596
ZNF688	All Targets	RNA	Endogenous	1	1	37	13	9.78654	1	1	146542	FALSE	0.260822	5.1041	-0.67721	4.97514	-3.80185	0.000283024	0.0307159	0.282144	4.8198	5.20814
CXCL9	All Targets	RNA	Endogenous	1	1	45	11	8.92383	1	1	4283	FALSE	0.256525	4.98641	-0.676716	4.8459	-3.7098	0.000386288	0.034039	0.0102531	4.65887	5.12644
FREM3	All Targets	RNA	Endogenous	1	1	31	9	7.56937	1	1	166752	FALSE	0.224085	4.79056	-0.676149	4.62383	-3.61025	0.000537991	0.0384987	-0.27752	4.4485	4.88683
CENPF	All Targets	RNA	Endogenous	1	1	43	9	7.98611	1	1	1063	FALSE	0.207768	4.84574	-0.676099	4.68007	-3.55247	0.000650426	0.0421603	-0.443266	4.60167	4.79766
MED6	All Targets	RNA	Endogenous	1	2	42	10.5	9.94599	1	1	10001	FALSE	-0.672476	5.0908	-0.675976	4.95921	-4.03627	0.000125674	0.0212272	0.997153	4.81816	5.17079
TEX37	All Targets	RNA	Endogenous	1	1	30	12	8.2038	1	1	200523	FALSE	0.149689	4.87568	-0.675452	4.72331	-3.71751	0.000376422	0.0337806	0.032883	4.60812	4.89609
HEG1	All Targets	RNA	Endogenous	1	1	40	11	9.20993	1	1	57493	FALSE	0.243012	5.00903	-0.674822	4.86937	-3.52131	0.000719984	0.0437855	-0.531843	4.70151	5.12116
SIGLEC1	All Targets	RNA	Endogenous	1	1	28	8.5	6.85405	1	1	6614	FALSE	0.531356	4.67041	-0.674557	4.48046	-3.1232	0.00252369	0.0724082	-1.60182	4.35527	4.66824
HIF3A	All Targets	RNA	Endogenous	1	1	72	10	7.81098	1	1	64344	FALSE	0.430531	4.83213	-0.673361	4.66043	-3.24412	0.00173456	0.0630614	-1.2868	4.58086	4.77978
TIMD4	All Targets	RNA	Endogenous	1	1	37	11	7.51202	1	1	91937	FALSE	0.611669	4.77945	-0.673256	4.61191	-3.32101	0.00136506	0.0569767	-1.08197	4.46505	4.83219
EVA1A	All Targets	RNA	Endogenous	1	1	40	12	9.47378	1	1	84141	FALSE	0.521507	5.05376	-0.67305	4.91658	-3.4446	0.000922354	0.0484103	-0.750975	4.79318	5.10167
AFF2	All Targets	RNA	Endogenous	1	1	44	11	8.42726	1	1	2334	FALSE	-0.733632	4.92321	-0.672782	4.77091	-3.863	0.000229629	0.0278547	0.464347	4.62101	4.99576
PAGE5	All Targets	RNA	Endogenous	1	1	37	9	7.43796	1	1	90737	FALSE	0.242974	4.76968	-0.672581	4.59427	-3.66979	0.000441583	0.0349354	-0.106192	4.46978	4.781
LRRC15	All Targets	RNA	Endogenous	1	1	46	13	8.8296	1	1	131578	FALSE	-0.150727	4.98269	-0.671997	4.83175	-3.51998	0.000723098	0.0437855	-0.53745	4.68606	5.05028
RDH8	All Targets	RNA	Endogenous	1	1	39	9.5	7.31434	1	1	50700	FALSE	-0.496442	4.74924	-0.671711	4.57672	-3.57872	0.000596844	0.0395804	-0.367495	4.39745	4.84563
CABYR	All Targets	RNA	Endogenous	1	1	27	8	6.12064	1	1	26256	FALSE	-0.347035	4.55152	-0.670946	4.34565	-3.28002	0.00155152	0.0594188	-1.18366	4.1608	4.62292
MYO5A	All Targets	RNA	Endogenous	1	1	36	12.5	8.9164	1	1	4644	FALSE	1.04995	4.98607	-0.670736	4.83702	-3.30726	0.00148941	0.0581616	-1.16545	4.74923	4.96871
VPREB3	All Targets	RNA	Endogenous	1	1	37	11	7.79561	1	1	29802	FALSE	-0.0462099	4.81723	-0.670548	4.65801	-3.70218	0.000396285	0.034039	-0.0119762	4.53928	4.83611
AQP8	All Targets	RNA	Endogenous	1	1	52	9	7.02695	1	1	343	FALSE	-0.322567	4.69733	-0.670111	4.51233	-3.43863	0.000940205	0.0487339	-0.75784	4.35981	4.74112
ZNF112	All Targets	RNA	Endogenous	1	1	42	12	8.0328	1	1	7771	FALSE	-0.414657	4.88233	-0.670092	4.70727	-3.14099	0.00241361	0.0707913	-1.56842	4.5284	4.97559
ABCC12	All Targets	RNA	Endogenous	1	1	27	8.5	6.47817	1	1	94160	FALSE	0.541822	4.61406	-0.669112	4.42196	-3.19525	0.00201543	0.0659596	-1.40948	4.24664	4.68493
PBK	All Targets	RNA	Endogenous	1	1	40	8	7.29447	1	1	55872	FALSE	0.131895	4.7467	-0.668761	4.56788	-3.22893	0.0018174	0.0639029	-1.32416	4.41037	4.80414
BACE1	All Targets	RNA	Endogenous	1	1	71	11.5	9.31164	1	1	23621	FALSE	0.420989	5.02899	-0.668301	4.88249	-3.24047	0.00187582	0.0646962	-1.36273	4.84001	4.94621
OPRL1	All Targets	RNA	Endogenous	1	1	35	11	8.81383	1	1	4987	FALSE	-0.142142	4.95811	-0.667878	4.81382	-3.79522	0.000289477	0.0307573	0.262379	4.63765	5.07806
CIDEB	All Targets	RNA	Endogenous	1	1	40	13	9.77885	1	1	27141	FALSE	0.378925	5.08479	-0.667816	4.94901	-3.34142	0.00128029	0.0561668	-1.02793	4.80316	5.16778
GPR26	All Targets	RNA	Endogenous	1	1	41	10.5	7.93708	1	1	2849	FALSE	0.304784	4.84134	-0.667653	4.6771	-3.22487	0.00184065	0.0639724	-1.33852	4.51002	4.92771
SNX31	All Targets	RNA	Endogenous	1	1	37	13	8.63559	1	1	169166	FALSE	-0.645239	4.94682	-0.667381	4.80046	-3.87995	0.00021662	0.0269476	0.516542	4.63935	5.04214
SPATA45	All Targets	RNA	Endogenous	1	1	40	10.5	8.25273	1	1	149643	FALSE	0.0357344	4.89288	-0.666594	4.73796	-3.67676	0.00043144	0.0347056	-0.0864707	4.59553	4.95162
MARCHF8	All Targets	RNA	Endogenous	1	1	32	9.5	7.79202	1	1	220972	FALSE	0.448904	4.82402	-0.666285	4.65903	-3.3509	0.00124258	0.0556764	-0.997198	4.42905	5.004
GIMAP4	All Targets	RNA	Endogenous	1	1	41	13	9.36166	1	1	55303	FALSE	0.0417117	5.03882	-0.665015	4.90157	-3.52138	0.00071981	0.0437855	-0.530801	4.70807	5.19181
CPLX1	All Targets	RNA	Endogenous	1	1	32	11	8.92168	1	1	10815	FALSE	0.0440703	4.97047	-0.664703	4.82064	-3.63972	0.000488018	0.0370709	-0.194235	4.7248	4.96438
TOM1L2	All Targets	RNA	Endogenous	1	1	37	7	6.23505	1	1	146691	FALSE	-0.182029	4.56024	-0.663825	4.36614	-3.48657	0.000805792	0.0465771	-0.625736	4.21019	4.60006
CTIF	All Targets	RNA	Endogenous	1	1	43	13	10.1747	1	1	9811	FALSE	0.794425	5.14563	-0.663498	5.00738	-3.2247	0.00201529	0.0659596	-1.42689	4.97751	5.05219
C5	All Targets	RNA	Endogenous	1	1	178	6	6.69296	1	1	727	FALSE	0.827413	4.65567	-0.663101	4.44768	-2.54315	0.0147611	0.146217	-3.06305	4.58145	4.24703
ECM2	All Targets	RNA	Endogenous	1	1	43	9.5	6.8432	1	1	1842	FALSE	0.679156	4.68036	-0.662357	4.4869	-3.19264	0.00203161	0.0659596	-1.42202	4.37916	4.6485
PROB1	All Targets	RNA	Endogenous	1	1	34	8.5	7.09431	1	1	389333	FALSE	0.270688	4.70693	-0.662011	4.52443	-3.29471	0.00148211	0.0581616	-1.15268	4.47705	4.5955
SPAG4	All Targets	RNA	Endogenous	1	1	36	9.5	6.97791	1	1	6676	FALSE	0.470798	4.6883	-0.661869	4.51248	-3.26896	0.0016058	0.0600941	-1.21847	4.34352	4.76592
MYMK	All Targets	RNA	Endogenous	1	1	29	9.5	7.32061	1	1	389827	FALSE	-0.0392893	4.74244	-0.661053	4.57448	-3.63078	0.000502685	0.0373146	-0.218697	4.3986	4.83832
DCST1	All Targets	RNA	Endogenous	1	1	62	12	9.16102	1	1	149095	FALSE	0.140599	5.01039	-0.660413	4.86676	-3.45705	0.000886212	0.0482946	-0.712053	4.78833	4.98442
OR5C1	All Targets	RNA	Endogenous	1	1	29	9	7.07172	1	1	392391	FALSE	-0.0452184	4.70386	-0.660168	4.52958	-3.50393	0.000761758	0.0453485	-0.578058	4.40093	4.72257
ENO3	All Targets	RNA	Endogenous	1	1	32	12	7.8008	1	1	2027	FALSE	1.03975	4.84289	-0.659536	4.67743	-3.17765	0.00212675	0.0674207	-1.45809	4.42983	5.04884
HSPB7	All Targets	RNA	Endogenous	1	1	41	10.5	7.70583	1	1	27129	FALSE	-0.0549268	4.81549	-0.659329	4.64052	-3.41229	0.00102277	0.0510824	-0.834639	4.54243	4.78764
OTOGL	All Targets	RNA	Endogenous	1	1	31	9	7.33007	1	1	283310	FALSE	0.294053	4.74685	-0.659195	4.577	-3.4602	0.000877274	0.0479523	-0.70047	4.44894	4.7691
FIGNL2	All Targets	RNA	Endogenous	1	1	30	11	8.65842	1	1	401720	FALSE	-0.338333	4.93579	-0.658478	4.78433	-3.60452	0.000548255	0.0384987	-0.295204	4.6504	4.98524
MYADML2	All Targets	RNA	Endogenous	1	1	52	7	5.57049	1	1	255275	FALSE	1.10904	4.44461	-0.658345	4.21624	-2.36835	0.0226005	0.17355	-3.38625	4.11857	4.36274
CRTAP	All Targets	RNA	Endogenous	1	1	40	12.5	10.8946	1	1	10491	FALSE	0.798703	5.2192	-0.658192	5.08972	-2.98092	0.00420826	0.0882658	-2.04181	4.95548	5.29106
PATE1	All Targets	RNA	Endogenous	1	1	39	10	7.51205	1	1	160065	FALSE	-0.241664	4.79025	-0.658124	4.61486	-3.36111	0.00120319	0.0543939	-0.970473	4.45707	4.85155
METTL8	All Targets	RNA	Endogenous	1	1	43	12.5	9.37428	1	1	79828	FALSE	0.996346	5.05055	-0.658082	4.91367	-3.48564	0.000808217	0.0465771	-0.641509	4.85244	5.0055
HTRA1	All Targets	RNA	Endogenous	1	1	39	10.5	9.21156	1	1	5654	FALSE	0.879007	5.02995	-0.658018	4.88492	-3.06598	0.00304699	0.0770054	-1.76714	4.66941	5.20818
DEFB1	All Targets	RNA	Endogenous	1	1	56	12	9.14273	1	1	1672	FALSE	0.649654	5.01379	-0.657614	4.86832	-3.20016	0.00202518	0.0659596	-1.42792	4.73513	5.06811
LONRF1	All Targets	RNA	Endogenous	1	1	57	13.5	10.0573	1	1	91694	FALSE	0.583242	5.12721	-0.657446	4.99185	-3.97854	0.000153879	0.023325	0.819603	4.95368	5.04911
KRTAP6-3	All Targets	RNA	Endogenous	1	1	32	10	8.8226	1	1	337968	FALSE	0.165414	4.97132	-0.656867	4.82326	-3.53144	0.000696627	0.0436311	-0.505843	4.73146	4.96095
STOML3	All Targets	RNA	Endogenous	1	1	28	5	5.00884	1	1	161003	FALSE	0.466006	4.34172	-0.656289	4.07981	-2.80148	0.00647342	0.101119	-2.37508	3.88529	4.37159
EXTL2	All Targets	RNA	Endogenous	1	1	39	12.5	9.19443	1	1	2135	FALSE	0.574712	5.02246	-0.65608	4.87906	-3.17691	0.00213162	0.0674563	-1.46153	4.60894	5.28423
ZNF878	All Targets	RNA	Endogenous	1	1	36	9	6.66812	1	1	729747	FALSE	0.300156	4.66003	-0.656008	4.46545	-3.45271	0.000898656	0.0484103	-0.719487	4.25841	4.77601
PLAGL1	All Targets	RNA	Endogenous	1	1	48	14	9.6085	1	1	5325	FALSE	-0.479527	5.0783	-0.655882	4.93949	-3.7025	0.000395856	0.034039	-0.0117622	4.8628	5.05452
A3GALT2	All Targets	RNA	Endogenous	1	1	32	10	7.25801	1	1	127550	FALSE	0.0182796	4.75316	-0.655756	4.57228	-3.44462	0.000922298	0.0484103	-0.742905	4.42028	4.80029
DUSP2	All Targets	RNA	Endogenous	1	1	49	14	8.66337	1	1	1844	FALSE	-0.127468	4.9713	-0.655593	4.81653	-3.36523	0.00118762	0.0543939	-0.95886	4.62955	5.097
FDCSP	All Targets	RNA	Endogenous	1	1	70	11.5	10.3746	1	1	260436	FALSE	-0.216961	5.23099	-0.655237	5.07382	-3.63283	0.000499285	0.0372153	-0.214254	4.95257	5.2557
WDR97	All Targets	RNA	Endogenous	1	1	34	8	6.61844	1	1	340390	FALSE	0.566713	4.65455	-0.653943	4.44441	-2.94611	0.00429042	0.0887785	-2.04639	4.32507	4.62342
ACOD1	All Targets	RNA	Endogenous	1	1	90	11	9.0295	1	1	730249	FALSE	0.87962	5.00313	-0.653896	4.85896	-3.20322	0.00196958	0.0657914	-1.40028	4.62901	5.20389
LUM	All Targets	RNA	Endogenous	1	1	60	11	10.4349	1	1	4060	FALSE	0.781936	5.16932	-0.653788	5.02915	-2.76044	0.00796795	0.112111	-2.56485	4.78482	5.39565
PCSK1	All Targets	RNA	Endogenous	1	1	43	11	8.81276	1	1	5122	FALSE	0.506998	4.96515	-0.653754	4.81225	-3.37693	0.00114445	0.0543322	-0.934062	4.66533	5.03263
OR5T2	All Targets	RNA	Endogenous	1	1	37	11.5	8.15324	1	1	219464	FALSE	-0.269319	4.87988	-0.653416	4.72363	-3.44431	0.000923226	0.0484103	-0.74646	4.55422	4.97774
SCN2B	All Targets	RNA	Endogenous	1	1	61	10	7.84242	1	1	6327	FALSE	0.306645	4.83351	-0.652287	4.66932	-3.36989	0.00117025	0.0543939	-0.954727	4.67925	4.65443
THG1L	All Targets	RNA	Endogenous	1	1	49	16	10.656	1	1	54974	FALSE	-0.282618	5.19754	-0.651537	5.07651	-3.59164	0.000572026	0.0392327	-0.333382	4.86546	5.3931
SPTLC3	All Targets	RNA	Endogenous	1	1	29	9	7.53858	1	1	55304	FALSE	0.383142	4.78056	-0.651411	4.61032	-3.17154	0.00216678	0.0679872	-1.47143	4.45924	4.83693
CD93	All Targets	RNA	Endogenous	1	1	36	12.5	8.70859	1	1	22918	FALSE	1.58561	4.9626	-0.651343	4.80425	-3.00804	0.0036178	0.0825005	-1.91101	4.69664	4.96567
SPEGNB	All Targets	RNA	Endogenous	1	1	25	7	5.73876	1	1	100996693	FALSE	0.307572	4.46344	-0.651333	4.24857	-3.18361	0.00208846	0.0667936	-1.43829	4.12134	4.43942
EPHA7	All Targets	RNA	Endogenous	1	1	34	11	8.6839	1	1	2045	FALSE	0.955544	4.94605	-0.65111	4.7864	-3.02504	0.00353022	0.0818485	-1.89491	4.75658	4.83112
FAM9A	All Targets	RNA	Endogenous	1	1	33	10	8.45558	1	1	171482	FALSE	0.455252	4.92374	-0.650767	4.76311	-3.25531	0.0016752	0.0615423	-1.25868	4.63877	4.94962
TNFSF15	All Targets	RNA	Endogenous	1	1	35	12	10.2399	1	1	9966	FALSE	-0.190931	5.14283	-0.650395	5.00734	-3.54389	0.000668926	0.0424334	-0.469719	4.88885	5.18508
DNER	All Targets	RNA	Endogenous	1	1	30	9	6.86634	1	1	92737	FALSE	0.0669029	4.67042	-0.649542	4.48575	-3.08564	0.00280841	0.0748726	-1.69046	4.33266	4.71538
PIGN	All Targets	RNA	Endogenous	1	1	54	14.5	12.4385	1	1	23556	FALSE	-0.214593	5.37638	-0.649057	5.26965	-3.98785	0.000148954	0.023325	0.849127	5.11976	5.49447
PCGF2	All Targets	RNA	Endogenous	1	1	127	14.5	13.2983	1	1	7703	FALSE	0.895034	5.47684	-0.648592	5.36019	-3.01509	0.00374162	0.0837511	-1.94839	5.2436	5.53507
HTR2B	All Targets	RNA	Endogenous	1	1	30	10	6.72108	1	1	3357	FALSE	0.567218	4.66033	-0.648579	4.46756	-2.98126	0.00390526	0.0852865	-1.9743	4.44857	4.49605
ENTPD1	All Targets	RNA	Endogenous	1	1	45	9.5	7.96488	1	1	953	FALSE	0.59886	4.86423	-0.648022	4.69537	-3.4059	0.00104383	0.0515851	-0.853545	4.5656	4.89002
ATP6V1G2	All Targets	RNA	Endogenous	1	1	36	10	7.676	1	1	534	FALSE	0.312868	4.8106	-0.647931	4.639	-3.31067	0.00140999	0.0575416	-1.10652	4.48741	4.86639
MYL10	All Targets	RNA	Endogenous	1	1	35	11	8.53676	1	1	93408	FALSE	-0.0228566	4.92645	-0.647737	4.77593	-3.54017	0.000677077	0.0425544	-0.477819	4.61077	5.02366
HTRA3	All Targets	RNA	Endogenous	1	1	38	10.5	9.19019	1	1	94031	FALSE	-0.29606	5.0159	-0.647715	4.87649	-3.59467	0.000566354	0.0391413	-0.324523	4.67766	5.17473
PPP1R1A	All Targets	RNA	Endogenous	1	1	42	12	8.71802	1	1	5502	FALSE	0.00793085	4.96106	-0.647658	4.81741	-3.6576	0.00045988	0.0359104	-0.141938	4.68162	5.02108
PROK2	All Targets	RNA	Endogenous	1	1	54	10	7.16715	1	1	60675	FALSE	0.606394	4.73298	-0.647141	4.54811	-3.11813	0.00254781	0.0727482	-1.61623	4.41649	4.74555
CALCR	All Targets	RNA	Endogenous	1	1	38	11	8.64386	1	1	799	FALSE	-0.304508	4.94866	-0.646146	4.79547	-3.63307	0.000498893	0.0372153	-0.212676	4.6266	5.04878
MS4A2	All Targets	RNA	Endogenous	1	1	30	10	6.22011	1	1	2206	FALSE	1.15445	4.58127	-0.645459	4.37918	-2.85575	0.00563702	0.0976173	-2.27337	4.24383	4.5822
M1AP	All Targets	RNA	Endogenous	1	1	36	10	6.80451	1	1	130951	FALSE	0.420616	4.68734	-0.645421	4.48774	-2.99651	0.00365812	0.0830002	-1.9115	4.28662	4.78942
ABCB5	All Targets	RNA	Endogenous	1	1	34	8	6.94325	1	1	340273	FALSE	0.291246	4.68775	-0.645331	4.5074	-3.20718	0.00194309	0.0654163	-1.37782	4.38939	4.68443
AZU1	All Targets	RNA	Endogenous	1	1	43	9.5	7.79396	1	1	566	FALSE	-0.557696	4.84009	-0.645053	4.66934	-3.43601	0.000948124	0.0488077	-0.768442	4.5461	4.85418
SPZ1	All Targets	RNA	Endogenous	1	1	38	8.5	7.0439	1	1	84654	FALSE	0.366807	4.72088	-0.644971	4.52788	-3.07243	0.00292209	0.0759193	-1.73028	4.40491	4.71233
PLAAT4	All Targets	RNA	Endogenous	1	2	73	15.5	15.106	1	1	5920	FALSE	0.939295	5.63023	-0.644596	5.53122	-3.52782	0.000704897	0.0437576	-0.527475	5.40493	5.72065
FAM241B	All Targets	RNA	Endogenous	1	1	44	12	8.58876	1	1	219738	FALSE	0.369156	4.94074	-0.644196	4.78929	-3.36962	0.00117126	0.0543939	-0.949605	4.66609	4.97409
ITGB3BP	All Targets	RNA	Endogenous	1	1	54	13	10.1511	1	1	23421	FALSE	-0.288621	5.13673	-0.643215	5.00812	-3.6032	0.000550653	0.0384987	-0.304516	4.94679	5.10012
OR8S1	All Targets	RNA	Endogenous	1	1	40	14	8.353	1	1	341568	FALSE	0.799005	4.92114	-0.643195	4.76315	-3.18622	0.0020719	0.0666753	-1.44215	4.5182	5.13059
ACKR2	All Targets	RNA	Endogenous	1	1	38	11	7.91716	1	1	1238	FALSE	-0.365972	4.88053	-0.642718	4.69222	-2.91909	0.00461897	0.0917535	-2.1092	4.49115	4.99382
DNAH12	All Targets	RNA	Endogenous	1	1	19	9	5.58786	1	1	201625	FALSE	0.837509	4.44449	-0.642701	4.22282	-3.03256	0.00328919	0.079638	-1.82498	4.08267	4.43304
APCDD1L	All Targets	RNA	Endogenous	1	1	44	11	8.61503	1	1	164284	FALSE	0.397161	4.93634	-0.641571	4.7893	-3.41187	0.00102415	0.0510824	-0.842172	4.74444	4.85658
GAS7	All Targets	RNA	Endogenous	1	1	72	9.5	8.72524	1	1	8522	FALSE	-0.439255	4.95311	-0.641046	4.80283	-3.49054	0.000795506	0.0461404	-0.617239	4.62405	5.07099
TMC8	All Targets	RNA	Endogenous	1	1	38	9.5	7.16779	1	1	147138	FALSE	-0.46325	4.73295	-0.640533	4.55085	-3.43598	0.000948211	0.0488077	-0.766878	4.39497	4.78467
IHO1	All Targets	RNA	Endogenous	1	1	37	12.5	8.86278	1	1	339834	FALSE	0.0766496	4.97161	-0.640262	4.8297	-3.45362	0.000896041	0.0484103	-0.71978	4.67014	5.06903
MAGEH1	All Targets	RNA	Endogenous	1	1	41	12	9.33453	1	1	28986	FALSE	0.200845	5.02336	-0.640071	4.88538	-3.33247	0.00131683	0.0567058	-1.05066	4.69961	5.16404
MATN4	All Targets	RNA	Endogenous	1	1	44	10	7.064	1	1	8785	FALSE	0.990936	4.73677	-0.639728	4.55005	-3.19211	0.00203493	0.0659596	-1.42929	4.50111	4.62345
MAP1A	All Targets	RNA	Endogenous	1	1	43	12.5	8.90734	1	1	4130	FALSE	0.185235	4.98154	-0.639517	4.83877	-3.43547	0.000949745	0.0488077	-0.771395	4.67901	5.07841
STIMATE	All Targets	RNA	Endogenous	1	1	39	12.5	9.59101	1	1	375346	FALSE	-0.0159604	5.06168	-0.639273	4.92866	-3.72763	0.000363831	0.0334836	0.0608494	4.83656	5.06681
HAMP	All Targets	RNA	Endogenous	1	1	29	9.5	7.40755	1	1	57817	FALSE	0.309385	4.75205	-0.638223	4.57791	-3.25839	0.00165931	0.0611669	-1.24556	4.43104	4.79822
TLR10	All Targets	RNA	Endogenous	1	1	36	11.5	8.6522	1	1	81793	FALSE	0.427721	4.95183	-0.637883	4.80488	-3.27148	0.00159327	0.0600941	-1.21837	4.68675	4.98206
MAP2	All Targets	RNA	Endogenous	1	1	42	11.5	8.73823	1	1	4133	FALSE	0.377091	4.96424	-0.63773	4.81294	-3.06638	0.00298852	0.0764194	-1.75408	4.64425	5.06598
GNG14	All Targets	RNA	Endogenous	1	1	52	13.5	10.979	1	1	105372280	FALSE	-0.226338	5.23464	-0.637586	5.11755	-3.64983	0.000471916	0.0363597	-0.166054	4.97399	5.33289
IGFBP7	All Targets	RNA	Endogenous	1	5	90	28	27.5372	1	1	3490	FALSE	0.719007	6.42375	-0.637254	6.36401	-2.75279	0.00934299	0.118953	-2.77073	6.17019	6.65475
ENOX2	All Targets	RNA	Endogenous	1	1	46	12.5	9.64442	1	1	10495	FALSE	0.350411	5.07674	-0.63666	4.93872	-3.36314	0.00119549	0.0543939	-0.978198	4.79046	5.16111
PDK3	All Targets	RNA	Endogenous	1	1	36	9	7.10969	1	1	5165	FALSE	0.154186	4.70872	-0.636449	4.53805	-3.19677	0.00200607	0.0659596	-1.40822	4.33347	4.8449
PRR36	All Targets	RNA	Endogenous	1	1	40	11	7.44613	1	1	80164	FALSE	0.133485	4.78224	-0.636395	4.60868	-3.42628	0.000978103	0.049637	-0.795766	4.5126	4.75281
FBXO2	All Targets	RNA	Endogenous	1	1	35	9	7.50857	1	1	26232	FALSE	0.394459	4.77607	-0.635814	4.60383	-3.12517	0.00249384	0.0719622	-1.59041	4.40746	4.89837
SLC10A5	All Targets	RNA	Endogenous	1	1	32	9	7.47808	1	1	347051	FALSE	0.655846	4.76681	-0.635513	4.58826	-3.01759	0.00347014	0.0811695	-1.88034	4.51762	4.69422
ANOS1	All Targets	RNA	Endogenous	1	1	33	9.5	7.44667	1	1	3730	FALSE	0.411547	4.76773	-0.634867	4.59463	-3.26358	0.00163282	0.0607594	-1.23172	4.46002	4.79655
RD3	All Targets	RNA	Endogenous	1	1	72	11	8.74679	1	1	343035	FALSE	0.675745	4.96033	-0.634611	4.81526	-3.19427	0.00202152	0.0659596	-1.41749	4.66134	5.04614
FLRT3	All Targets	RNA	Endogenous	1	1	72	15	9.51764	1	1	23767	FALSE	0.106711	5.06318	-0.634175	4.93011	-3.45555	0.000890507	0.0483824	-0.723549	4.80096	5.12383
PATE3	All Targets	RNA	Endogenous	1	1	48	11	7.45346	1	1	100169851	FALSE	0.00415251	4.78651	-0.634094	4.60896	-3.25873	0.00165753	0.0611669	-1.24616	4.36523	4.97456
STON1	All Targets	RNA	Endogenous	1	1	34	11	8.07166	1	1	11037	FALSE	0.122688	4.8632	-0.633403	4.69806	-3.4501	0.000906241	0.0484103	-0.734039	4.65037	4.7696
LCNL1	All Targets	RNA	Endogenous	1	1	38	12.5	8.30459	1	1	401562	FALSE	0.210779	4.90073	-0.633333	4.75089	-3.39753	0.001072	0.052359	-0.874921	4.58156	5.00488
EFCC1	All Targets	RNA	Endogenous	1	1	38	11.5	8.2131	1	1	79825	FALSE	0.29855	4.89393	-0.633129	4.73601	-3.38924	0.00110061	0.0532247	-0.899449	4.66467	4.843
KRT74	All Targets	RNA	Endogenous	1	1	29	9.5	7.38595	1	1	121391	FALSE	-0.228857	4.75467	-0.632988	4.58342	-3.37606	0.00114761	0.0543322	-0.931304	4.46236	4.76501
CASS4	All Targets	RNA	Endogenous	1	1	25	7.5	6.53647	1	1	57091	FALSE	-0.0807851	4.62018	-0.632618	4.41822	-2.96313	0.00403357	0.0867193	-1.99511	4.25909	4.6569
CCDC188	All Targets	RNA	Endogenous	1	1	71	12	8.32691	1	1	388849	FALSE	-0.380809	4.9114	-0.632324	4.76312	-3.28822	0.00151239	0.0585416	-1.17407	4.64362	4.94236
TMEM45A	All Targets	RNA	Endogenous	1	1	65	10.5	8.74159	1	1	55076	FALSE	0.48478	4.95528	-0.632255	4.81352	-3.38587	0.00111247	0.0536543	-0.915081	4.66696	5.03336
SPSB1	All Targets	RNA	Endogenous	1	1	59	13.5	10.216	1	1	80176	FALSE	0.840602	5.14934	-0.631995	5.01706	-3.27653	0.00156847	0.0598139	-1.21103	4.92521	5.15482
TSPAN12	All Targets	RNA	Endogenous	1	1	32	8	7.23387	1	1	23554	FALSE	0.67627	4.73423	-0.631387	4.55688	-3.02216	0.0033919	0.0805571	-1.85047	4.35711	4.85654
TFAP2D	All Targets	RNA	Endogenous	1	1	36	13	8.68067	1	1	83741	FALSE	1.05547	4.96762	-0.631334	4.81278	-3.14926	0.0023259	0.0705119	-1.54892	4.66042	5.04133
SLC5A9	All Targets	RNA	Endogenous	1	1	40	13.5	9.09075	1	1	200010	FALSE	0.328371	5.0141	-0.631301	4.86514	-3.46958	0.000851183	0.0476519	-0.67844	4.76066	5.02185
TTBK2	All Targets	RNA	Endogenous	1	1	53	12	9.76569	1	1	146057	FALSE	0.699481	5.09107	-0.630809	4.95754	-3.47455	0.000837653	0.0476519	-0.663944	4.76157	5.25149
C17orf67	All Targets	RNA	Endogenous	1	1	40	9.5	7.09947	1	1	339210	FALSE	0.198632	4.71355	-0.630283	4.53397	-3.23328	0.00179323	0.0639029	-1.31393	4.43719	4.67915
CLEC9A	All Targets	RNA	Endogenous	1	1	44	12.5	8.43352	1	1	283420	FALSE	0.260822	4.92939	-0.630257	4.77255	-3.37389	0.00115553	0.0543939	-0.942787	4.62138	4.99932
MANEA	All Targets	RNA	Endogenous	1	1	33	8.5	6.86966	1	1	79694	FALSE	-0.94919	4.66111	-0.630025	4.48169	-3.39695	0.001074	0.052359	-0.871336	4.31142	4.73709
NAGS	All Targets	RNA	Endogenous	1	1	32	9.5	7.35079	1	1	162417	FALSE	0.373987	4.7644	-0.629722	4.58979	-3.15417	0.00228427	0.0701935	-1.52078	4.37446	4.91278
PGK2	All Targets	RNA	Endogenous	1	1	45	13	8.74226	1	1	5232	FALSE	0.385123	4.9729	-0.629091	4.82377	-3.62579	0.000511061	0.0375299	-0.235488	4.73563	4.95598
WFDC8	All Targets	RNA	Endogenous	1	1	26	9	6.61823	1	1	90199	FALSE	-0.0517	4.62377	-0.628913	4.42964	-3.13508	0.00242029	0.0708721	-1.56345	4.326	4.5851
NMS	All Targets	RNA	Endogenous	1	1	33	9.5	7.43939	1	1	129521	FALSE	0.986601	4.76471	-0.62872	4.58459	-2.50954	0.0153467	0.148968	-3.09094	4.40432	4.85499
GZMH	All Targets	RNA	Endogenous	1	1	36	12.5	8.84491	1	1	2999	FALSE	-0.425304	4.9755	-0.628582	4.8219	-3.36975	0.00117077	0.0543939	-0.956365	4.67814	5.03753
MATN3	All Targets	RNA	Endogenous	1	1	33	10.5	8.26289	1	1	4148	FALSE	0.114669	4.88525	-0.628387	4.721	-3.10966	0.00261316	0.0736021	-1.63708	4.55797	4.96554
POLR2G	All Targets	RNA	Endogenous	1	1	38	10	9.04422	1	1	5436	FALSE	0.2809	4.99822	-0.628059	4.85189	-3.48229	0.000816991	0.0467837	-0.642395	4.71958	5.05036
ERBB4	All Targets	RNA	Endogenous	1	1	39	9.5	7.59245	1	1	2066	FALSE	0.222934	4.79724	-0.627835	4.62947	-3.32609	0.00134345	0.0569767	-1.06712	4.49077	4.83752
CST8	All Targets	RNA	Endogenous	1	1	37	15	10.8871	1	1	10047	FALSE	0.0770446	5.22011	-0.627795	5.09343	-3.64951	0.000472405	0.0363597	-0.171304	5.04777	5.16193
C1QTNF7	All Targets	RNA	Endogenous	1	1	39	11	8.69768	1	1	114905	FALSE	0.263007	4.96363	-0.627521	4.81598	-3.56095	0.000632634	0.0414962	-0.421048	4.66724	5.0391
SYNGR3	All Targets	RNA	Endogenous	1	1	47	15.5	10.1395	1	1	9143	FALSE	-0.0305684	5.14568	-0.62717	5.00906	-3.52827	0.000703844	0.0437576	-0.514545	4.93879	5.11446
HLA-DRA	All Targets	RNA	Endogenous	1	2	167	13.5	15.1586	1	1	3122	FALSE	1.87199	5.64389	-0.62698	5.54067	-3.25137	0.00173086	0.0630614	-1.31039	5.46805	5.64959
FBXL18	All Targets	RNA	Endogenous	1	1	21	7	5.46974	1	1	80028	FALSE	0.644314	4.42515	-0.626575	4.19655	-3.03023	0.00331196	0.0799748	-1.8286	4.06936	4.38734
RGL4	All Targets	RNA	Endogenous	1	1	34	14.5	9.11221	1	1	266747	FALSE	-0.260276	5.01795	-0.626241	4.87861	-3.61176	0.000535314	0.0384987	-0.275957	4.71075	5.13039
ARHGEF19	All Targets	RNA	Endogenous	1	1	53	10	9.28517	1	1	128272	FALSE	0.00966641	5.0293	-0.626178	4.87915	-3.33981	0.00128677	0.0562005	-1.02854	4.70354	5.14257
PITPNM3	All Targets	RNA	Endogenous	1	1	38	13	9.68149	1	1	83394	FALSE	0.642498	5.08309	-0.625444	4.94702	-3.1455	0.00234518	0.0706215	-1.55551	4.85895	5.07912
FASTKD1	All Targets	RNA	Endogenous	1	1	58	13.5	9.99981	1	1	79675	FALSE	0.508276	5.11961	-0.625317	4.98451	-3.20656	0.00194679	0.0654163	-1.38985	4.73144	5.36412
KCNT2	All Targets	RNA	Endogenous	1	1	28	9	5.8198	1	1	343450	FALSE	0.673418	4.5078	-0.625262	4.28911	-2.90634	0.0047551	0.092627	-2.12876	4.04391	4.65692
CACNB2	All Targets	RNA	Endogenous	1	1	45	13	8.61198	1	1	783	FALSE	0.0384679	4.94613	-0.624917	4.80046	-3.44767	0.000913337	0.0484103	-0.737957	4.65959	5.01177
ONECUT1	All Targets	RNA	Endogenous	1	1	72	12.5	8.71897	1	1	3175	FALSE	0.178818	4.97349	-0.624058	4.81379	-3.01562	0.00345802	0.0811128	-1.87252	4.57648	5.16975
DCDC2C	All Targets	RNA	Endogenous	1	1	28	8.5	6.48063	1	1	728597	FALSE	0.363674	4.61675	-0.623736	4.42935	-3.18953	0.00205102	0.0663017	-1.42603	4.326	4.58438
HORMAD2	All Targets	RNA	Endogenous	1	1	34	11	7.48444	1	1	150280	FALSE	0.424821	4.78282	-0.623693	4.62063	-3.32458	0.00134984	0.0569767	-1.07048	4.45488	4.86925
BGN	All Targets	RNA	Endogenous	1	7	113	27	26.8631	1	1	633	FALSE	1.24342	6.39079	-0.622854	6.32828	-2.32916	0.0266248	0.188149	-3.63162	6.09034	6.68518
FZD3	All Targets	RNA	Endogenous	1	1	35	10.5	7.86356	1	1	7976	FALSE	0.260011	4.83787	-0.622497	4.66506	-2.84854	0.00569129	0.097771	-2.29095	4.51634	4.88812
ADH1A	All Targets	RNA	Endogenous	1	1	26	10	7.39206	1	1	124	FALSE	0.780944	4.76108	-0.622257	4.59606	-3.12771	0.00247479	0.0716537	-1.58861	4.40166	4.88765
PLIN1	All Targets	RNA	Endogenous	1	1	38	10.5	6.8602	1	1	5346	FALSE	0.387861	4.6854	-0.62203	4.50208	-3.08079	0.00284952	0.0754201	-1.70016	4.29426	4.81381
SYP	All Targets	RNA	Endogenous	1	1	184	31	21.3635	1	1	6855	FALSE	0.77691	6.11126	-0.621757	6.03837	-2.53798	0.0155546	0.14948	-3.16644	5.84797	6.32397
KRT23	All Targets	RNA	Endogenous	1	1	61	12.5	12.2887	1	1	25984	FALSE	1.30253	5.39231	-0.621443	5.26605	-2.93412	0.00459233	0.0916333	-2.12605	5.04175	5.6025
LYG2	All Targets	RNA	Endogenous	1	1	40	9.5	7.53945	1	1	254773	FALSE	-0.44613	4.77804	-0.621428	4.60628	-3.32736	0.00133813	0.0569767	-1.06089	4.43798	4.85872
OR13A1	All Targets	RNA	Endogenous	1	1	34	9	7.99906	1	1	79290	FALSE	-0.186965	4.83974	-0.621425	4.67644	-3.22981	0.00181249	0.0639029	-1.32571	4.57355	4.83076
OR5M8	All Targets	RNA	Endogenous	1	1	36	8	6.90067	1	1	219484	FALSE	-0.279618	4.67311	-0.621339	4.49205	-3.14823	0.00232583	0.0705119	-1.53245	4.35278	4.70094
PTX4	All Targets	RNA	Endogenous	1	1	43	11	8.19129	1	1	390667	FALSE	0.182268	4.89591	-0.621027	4.73415	-3.13877	0.00239345	0.0707869	-1.56385	4.57451	4.97362
LRCOL1	All Targets	RNA	Endogenous	1	1	30	11	7.76506	1	1	100507055	FALSE	0.389202	4.81027	-0.620773	4.64921	-3.18535	0.00207736	0.0666753	-1.44085	4.45897	4.93458
ANGPTL1	All Targets	RNA	Endogenous	1	1	34	13.5	8.80614	1	1	9068	FALSE	0.284331	4.98099	-0.620511	4.82556	-3.22482	0.00184059	0.0639724	-1.34568	4.65493	5.0815
HTR6	All Targets	RNA	Endogenous	1	1	31	7.5	5.97086	1	1	3362	FALSE	0.076559	4.52127	-0.620471	4.29979	-2.87127	0.00525833	0.0959047	-2.21534	4.1592	4.51069
CFAP57	All Targets	RNA	Endogenous	1	1	32	11	7.22153	1	1	149465	FALSE	-0.00511872	4.73501	-0.620276	4.56335	-3.13735	0.00240377	0.0707869	-1.56448	4.39036	4.82284
BCHE	All Targets	RNA	Endogenous	1	1	30	8.5	6.10275	1	1	590	FALSE	1.21574	4.54876	-0.619131	4.34905	-2.77788	0.00685832	0.104751	-2.43241	4.16798	4.62066
ADAMTS17	All Targets	RNA	Endogenous	1	1	39	11.5	7.82973	1	1	170691	FALSE	0.390437	4.82845	-0.618938	4.66956	-3.29467	0.00148227	0.0581616	-1.15596	4.53014	4.87869
LRP5L	All Targets	RNA	Endogenous	1	1	72	10.5	8.60684	1	1	91355	FALSE	0.551536	4.95549	-0.618762	4.79681	-3.03883	0.00322867	0.0790584	-1.82167	4.70203	4.93898
PER1	All Targets	RNA	Endogenous	1	1	45	9	7.86228	1	1	5187	FALSE	1.04477	4.83155	-0.618669	4.66744	-2.78856	0.00689366	0.105112	-2.45245	4.51556	4.89526
TXNDC16	All Targets	RNA	Endogenous	1	1	47	13.5	9.761	1	1	57544	FALSE	0.732464	5.09113	-0.618123	4.95625	-2.89108	0.00514304	0.0951066	-2.21667	4.83943	5.13148
FGF16	All Targets	RNA	Endogenous	1	1	26	9	7.46437	1	1	8823	FALSE	0.0423402	4.76793	-0.618091	4.59916	-3.37031	0.00116868	0.0543939	-0.950295	4.52538	4.70983
DNMT3B	All Targets	RNA	Endogenous	1	1	40	11	8.64871	1	1	1789	FALSE	0.162406	4.93716	-0.618057	4.79602	-3.36157	0.00120144	0.0543939	-0.978428	4.64467	5.02305
GINS1	All Targets	RNA	Endogenous	1	1	47	15	10.1552	1	1	9837	FALSE	0.168559	5.13694	-0.61786	5.00605	-3.32039	0.00136772	0.0569767	-1.09427	4.9014	5.16302
FAM120AOS	All Targets	RNA	Endogenous	1	1	47	14	11.5806	1	1	158293	FALSE	1.2674	5.30632	-0.617506	5.17723	-2.90882	0.00481231	0.0933381	-2.15973	5.06131	5.35112
CCR7	All Targets	RNA	Endogenous	1	1	39	13	10.0017	1	1	1236	FALSE	0.0769965	5.11005	-0.617216	4.98111	-3.58971	0.000575659	0.039307	-0.342083	4.83469	5.20073
SRM	All Targets	RNA	Endogenous	1	1	34	10.5	9.36877	1	1	6723	FALSE	-0.38187	5.02436	-0.617116	4.87847	-3.31638	0.00138501	0.0574319	-1.10012	4.77595	5.03224
TMEM251	All Targets	RNA	Endogenous	1	1	50	13.5	10.2575	1	1	26175	FALSE	-0.501711	5.15506	-0.617084	5.02487	-3.59242	0.000570564	0.0392327	-0.332884	4.87408	5.25105
METTL7A	All Targets	RNA	Endogenous	1	1	35	10.5	8.13571	1	1	25840	FALSE	1.43468	4.88307	-0.616981	4.7138	-2.62116	0.0113642	0.130151	-2.8628	4.6165	4.85976
COL4A3	All Targets	RNA	Endogenous	1	1	33	9.5	7.2088	1	1	1285	FALSE	0.256254	4.73355	-0.61653	4.55723	-3.24823	0.00171231	0.062531	-1.2726	4.36049	4.85234
SUV39H2	All Targets	RNA	Endogenous	1	1	42	11	7.9958	1	1	79723	FALSE	0.0284787	4.83703	-0.615831	4.67471	-3.38284	0.0011232	0.0540025	-0.912075	4.56824	4.8344
CYP4F2	All Targets	RNA	Endogenous	1	1	20	6	4.64458	1	1	8529	FALSE	0.590907	4.25409	-0.615566	3.98671	-2.75625	0.00727296	0.107974	-2.46328	3.73999	4.35678
ATP12A	All Targets	RNA	Endogenous	1	1	27	9.5	6.32139	1	1	479	FALSE	0.343947	4.58919	-0.614816	4.38807	-2.99071	0.00372086	0.0835828	-1.93473	4.33477	4.46803
FAM110B	All Targets	RNA	Endogenous	1	1	41	11.5	7.67664	1	1	90362	FALSE	0.249756	4.80949	-0.614337	4.6486	-3.13709	0.00240561	0.0707869	-1.56903	4.54819	4.79922
LILRB5	All Targets	RNA	Endogenous	1	1	39	9.5	7.1874	1	1	10990	FALSE	0.521753	4.72524	-0.614024	4.55178	-3.15567	0.00227392	0.0701182	-1.52074	4.43912	4.72078
GPR101	All Targets	RNA	Endogenous	1	1	34	9	6.70502	1	1	83550	FALSE	0.148052	4.65392	-0.613897	4.46045	-3.10452	0.00265381	0.0736142	-1.64324	4.29272	4.71205
RSPH1	All Targets	RNA	Endogenous	1	1	33	11.5	8.77742	1	1	89765	FALSE	0.902208	4.96398	-0.613322	4.80138	-2.90234	0.00481025	0.0933381	-2.14941	4.65469	5.02143
AKTIP	All Targets	RNA	Endogenous	1	1	31	11.5	8.63941	1	1	64400	FALSE	0.786337	4.94523	-0.613057	4.79877	-3.14656	0.00233807	0.0706151	-1.55933	4.75606	4.86284
TNFSF11	All Targets	RNA	Endogenous	1	1	37	12	9.09568	1	1	8600	FALSE	-0.389118	4.99875	-0.612977	4.86728	-3.54379	0.000669145	0.0424334	-0.469178	4.75662	5.03327
CXorf51B	All Targets	RNA	Endogenous	1	1	41	13	9.01432	1	1	100133053	FALSE	-0.0121374	5.01078	-0.612555	4.8674	-3.32207	0.00136053	0.0569767	-1.0826	4.6514	5.1914
OR51B5	All Targets	RNA	Endogenous	1	1	39	11	7.37864	1	1	282763	FALSE	0.369957	4.76651	-0.61253	4.59349	-3.16489	0.00221107	0.0690022	-1.49622	4.46874	4.78061
HPN	All Targets	RNA	Endogenous	1	1	113	14.5	11.458	1	1	3249	FALSE	-0.254154	5.29163	-0.612205	5.17373	-3.31337	0.00139813	0.0574473	-1.10691	4.985	5.45683
CDCA4	All Targets	RNA	Endogenous	1	1	44	12	8.99552	1	1	55038	FALSE	-0.0841869	4.99808	-0.611771	4.85523	-3.33238	0.0013172	0.0567058	-1.05474	4.70366	5.0826
RFX8	All Targets	RNA	Endogenous	1	1	60	12	9.48616	1	1	731220	FALSE	0.260067	5.05873	-0.611585	4.92453	-3.28308	0.00153681	0.0591065	-1.18723	4.74758	5.18997
CX3CL1	All Targets	RNA	Endogenous	1	1	52	12	11.4889	1	1	6376	FALSE	1.01963	5.28848	-0.61137	5.16019	-2.78074	0.00723712	0.107582	-2.50436	5.00795	5.38857
CTRL	All Targets	RNA	Endogenous	1	1	35	10	7.92743	1	1	1506	FALSE	0.274586	4.85093	-0.611322	4.68528	-3.22733	0.0018264	0.0639724	-1.33894	4.60705	4.80263
INAFM1	All Targets	RNA	Endogenous	1	1	51	11	7.5403	1	1	255783	FALSE	0.49345	4.79019	-0.611146	4.62375	-3.12417	0.0025014	0.0719622	-1.60854	4.58733	4.67838
NDUFA4L2	All Targets	RNA	Endogenous	1	1	77	12.5	11.0209	1	1	56901	FALSE	-0.30397	5.22883	-0.61086	5.1068	-3.43369	0.000955194	0.0489482	-0.785769	4.975	5.3045
B9D1	All Targets	RNA	Endogenous	1	1	29	9.5	7.37671	1	1	27077	FALSE	0.447308	4.77474	-0.610703	4.59208	-2.75127	0.00757311	0.109546	-2.52885	4.4801	4.76004
OR4C12	All Targets	RNA	Endogenous	1	1	35	9.5	7.1165	1	1	283093	FALSE	0.802924	4.72454	-0.610044	4.54807	-2.90909	0.00474355	0.092627	-2.14615	4.39154	4.78286
RRP7A	All Targets	RNA	Endogenous	1	1	50	13	10.243	1	1	27341	FALSE	0.721518	5.15559	-0.609852	5.02996	-3.14309	0.00236914	0.0706357	-1.57438	4.90434	5.2184
PLXNA4	All Targets	RNA	Endogenous	1	1	28	10	7.48901	1	1	91584	FALSE	-0.0968492	4.76773	-0.609257	4.59683	-3.10737	0.00263125	0.0736142	-1.63648	4.35545	4.95889
RBP1	All Targets	RNA	Endogenous	1	1	66	16	12.761	1	1	5947	FALSE	1.18026	5.43034	-0.608986	5.30507	-3.08763	0.00279178	0.0748726	-1.70606	5.10827	5.60027
CLECL1	All Targets	RNA	Endogenous	1	1	33	10.5	7.0176	1	1	160365	FALSE	0.525973	4.71072	-0.608466	4.53379	-2.97546	0.00389088	0.0852865	-1.97607	4.3653	4.78653
PRSS23	All Targets	RNA	Endogenous	1	1	49	13.5	9.9625	1	1	11098	FALSE	0.468402	5.1366	-0.608466	4.98194	-2.94428	0.00426937	0.0886201	-2.05836	4.71115	5.38812
SH3TC2	All Targets	RNA	Endogenous	1	1	39	10.5	8.59198	1	1	79628	FALSE	0.00277614	4.93006	-0.60824	4.77689	-3.32247	0.0013588	0.0569767	-1.08189	4.63911	4.98355
SCGB3A1	All Targets	RNA	Endogenous	1	1	125	13	11.4625	1	1	92304	FALSE	-0.373921	5.28432	-0.608047	5.16647	-2.64188	0.0111546	0.129576	-2.87297	5.07452	5.3044
OR52W1	All Targets	RNA	Endogenous	1	1	27	11	7.73548	1	1	120787	FALSE	0.22418	4.81136	-0.607956	4.6519	-3.29627	0.0014749	0.0581616	-1.14874	4.49043	4.89411
C11orf16	All Targets	RNA	Endogenous	1	1	43	13.5	9.34487	1	1	56673	FALSE	0.804007	5.05225	-0.607176	4.91556	-3.22909	0.00181652	0.0639029	-1.33679	4.71262	5.21996
CAMK1	All Targets	RNA	Endogenous	1	1	26	9	6.92498	1	1	8536	FALSE	-0.229615	4.68486	-0.607061	4.50256	-3.12899	0.00246527	0.071608	-1.58328	4.38635	4.67688
DGAT2L6	All Targets	RNA	Endogenous	1	1	27	6.5	5.90799	1	1	347516	FALSE	0.647674	4.51009	-0.606616	4.28962	-2.59667	0.0112994	0.129705	-2.83237	4.0461	4.65491
PHF21A	All Targets	RNA	Endogenous	1	1	34	9	7.45492	1	1	51317	FALSE	-0.0541187	4.77231	-0.606033	4.60042	-2.9738	0.00390982	0.0852865	-1.96962	4.3553	4.96809
ASMT	All Targets	RNA	Endogenous	1	1	22	7	5.95069	1	1	438	FALSE	0.599925	4.50606	-0.605878	4.29716	-2.8446	0.00567339	0.097771	-2.28001	4.17549	4.47967
ATP4B	All Targets	RNA	Endogenous	1	1	31	10	6.68961	1	1	496	FALSE	0.722785	4.65729	-0.605621	4.46217	-2.88333	0.00508	0.0947216	-2.19466	4.31711	4.67976
GZMM	All Targets	RNA	Endogenous	1	1	43	12	8.02116	1	1	3004	FALSE	-0.0125234	4.87346	-0.605495	4.70707	-3.22599	0.00183396	0.0639724	-1.34024	4.61148	4.85045
MYH11	All Targets	RNA	Endogenous	1	1	45	13	9.58365	1	1	4629	FALSE	0.178986	5.07024	-0.605422	4.93399	-3.36407	0.00119201	0.0543939	-0.969845	4.7467	5.21492
STAC	All Targets	RNA	Endogenous	1	1	36	12.5	8.11176	1	1	6769	FALSE	0.379742	4.8709	-0.605349	4.71025	-3.03769	0.00323954	0.0791065	-1.82052	4.56243	4.93199
CST2	All Targets	RNA	Endogenous	1	1	73	12.5	9.43359	1	1	1470	FALSE	0.588714	5.05845	-0.60532	4.92253	-3.19705	0.00200436	0.0659596	-1.41999	4.735	5.20383
DTHD1	All Targets	RNA	Endogenous	1	1	37	9	7.70742	1	1	401124	FALSE	-0.119639	4.80971	-0.605061	4.643	-3.00379	0.00358062	0.0822923	-1.90214	4.52301	4.82299
SCGB2A2	All Targets	RNA	Endogenous	1	1	45	11	7.63628	1	1	4250	FALSE	0.119893	4.81357	-0.604771	4.64306	-3.33496	0.00130654	0.0566523	-1.04353	4.46324	4.91278
NMBR	All Targets	RNA	Endogenous	1	1	38	10	7.98043	1	1	4829	FALSE	-0.024896	4.85622	-0.604694	4.69408	-3.25794	0.00166159	0.0611669	-1.25124	4.58823	4.85286
DIPK2B	All Targets	RNA	Endogenous	1	1	59	9.5	7.82888	1	1	79742	FALSE	0.702344	4.83569	-0.604285	4.66239	-2.8172	0.00615687	0.099872	-2.35803	4.52544	4.86781
ARMC3	All Targets	RNA	Endogenous	1	1	31	10	8.53787	1	1	219681	FALSE	0.0601724	4.93232	-0.604276	4.78763	-3.2424	0.00174345	0.0631491	-1.29669	4.61044	5.05342
ZNF480	All Targets	RNA	Endogenous	1	1	49	10.5	8.71091	1	1	147657	FALSE	0.234276	4.94965	-0.604041	4.79922	-3.18683	0.00206798	0.0666753	-1.44091	4.65799	5.01107
HTR7	All Targets	RNA	Endogenous	1	1	35	8.5	7.12696	1	1	3363	FALSE	-0.0385036	4.71783	-0.603931	4.52945	-2.82531	0.00599851	0.0992631	-2.33375	4.41315	4.70389
KRTAP15-1	All Targets	RNA	Endogenous	1	1	36	8.5	7.64382	1	1	254950	FALSE	0.414724	4.80177	-0.603023	4.62628	-2.81135	0.00623307	0.099931	-2.36043	4.40974	4.95109
WDR54	All Targets	RNA	Endogenous	1	1	50	9.5	7.4461	1	1	84058	FALSE	-0.194412	4.77227	-0.60288	4.59606	-3.04715	0.00314998	0.0782496	-1.78715	4.44803	4.8181
PNKD	All Targets	RNA	Endogenous	1	1	47	13	9.5849	1	1	25953	FALSE	0.0906195	5.06067	-0.602685	4.92371	-3.24819	0.00171251	0.062531	-1.28526	4.81435	5.08775
SERPINF1	All Targets	RNA	Endogenous	1	1	47	13.5	10.1415	1	1	5176	FALSE	-0.920012	5.13098	-0.602534	5.00203	-3.47003	0.000849955	0.0476519	-0.677715	4.8636	5.20968
ATRNL1	All Targets	RNA	Endogenous	1	1	28	9.5	7.55736	1	1	26033	FALSE	0.178486	4.79041	-0.602421	4.61898	-3.19181	0.00203678	0.0659596	-1.42712	4.49281	4.80823
IQCN	All Targets	RNA	Endogenous	1	1	27	9.5	8.91413	1	1	80726	FALSE	0.158144	4.9667	-0.602324	4.80845	-3.14249	0.00236662	0.0706357	-1.55658	4.80821	4.80881
DMC1	All Targets	RNA	Endogenous	1	1	36	10.5	8.34912	1	1	11144	FALSE	0.725816	4.92053	-0.602118	4.75212	-2.82879	0.0059544	0.0991548	-2.33058	4.5344	5.07871
FZD2	All Targets	RNA	Endogenous	1	1	38	11.5	8.46124	1	1	2535	FALSE	0.471715	4.92245	-0.601776	4.76043	-2.92043	0.00456569	0.0913038	-2.11295	4.63154	4.95375
ZNF135	All Targets	RNA	Endogenous	1	1	38	11	8.25253	1	1	7694	FALSE	-0.32369	4.89771	-0.601729	4.74259	-3.19293	0.00202979	0.0659596	-1.42211	4.54786	5.03468
TSPAN6	All Targets	RNA	Endogenous	1	1	36	12	11.7037	1	1	7105	FALSE	0.502867	5.30989	-0.60151	5.18774	-3.02582	0.00335983	0.080344	-1.86671	5.01795	5.44244
DNAJC12	All Targets	RNA	Endogenous	1	1	26	8	6.48593	1	1	56521	FALSE	-0.0547479	4.61179	-0.601495	4.41343	-3.07821	0.00287157	0.0754834	-1.71238	4.32525	4.5457
DNAH3	All Targets	RNA	Endogenous	1	1	45	11	8.1666	1	1	55567	FALSE	0.585462	4.88534	-0.601445	4.72518	-3.1245	0.00249892	0.0719622	-1.615	4.69103	4.7764
CHKA	All Targets	RNA	Endogenous	1	1	42	13.5	9.62628	1	1	1119	FALSE	-0.742223	5.09204	-0.601336	4.9491	-3.31532	0.00138961	0.0574405	-1.10193	4.84593	5.10386
ATP6V0D2	All Targets	RNA	Endogenous	1	1	38	10	8.41165	1	1	245972	FALSE	0.127367	4.92022	-0.601129	4.75949	-3.23333	0.00179295	0.0639029	-1.32161	4.67154	4.89143
ADGRD1	All Targets	RNA	Endogenous	1	1	30	10.5	7.48711	1	1	283383	FALSE	0.309741	4.7783	-0.600958	4.60777	-2.85765	0.00547193	0.0970639	-2.26115	4.44895	4.84601
GFOD1	All Targets	RNA	Endogenous	1	1	30	11.5	7.39852	1	1	54438	FALSE	1.0589	4.77517	-0.600514	4.58822	-2.65067	0.0100632	0.124074	-2.76258	4.39534	4.87754
CP	All Targets	RNA	Endogenous	1	1	85	16	12.4274	1	1	1356	FALSE	1.59542	5.40314	-0.600069	5.28778	-2.67466	0.0098697	0.122534	-2.76581	5.12411	5.5333
CDKN2A	All Targets	RNA	Endogenous	1	1	139	20	16.9719	1	1	1029	FALSE	3.83435	5.81589	-0.600046	5.70753	-3.5968	0.000562395	0.0390173	-0.335308	5.55848	5.9311
KCTD17	All Targets	RNA	Endogenous	1	1	54	12	9.43408	1	1	79734	FALSE	-0.474617	5.05283	-0.599477	4.9164	-3.43212	0.000959984	0.0490544	-0.783156	4.80873	5.07791
KAT5	All Targets	RNA	Endogenous	1	1	48	15	12.835	1	1	10524	FALSE	0.454971	5.42509	-0.599466	5.3166	-3.21293	0.00191182	0.0651897	-1.39986	5.23352	5.44124
RNF217	All Targets	RNA	Endogenous	1	1	51	12	10.2117	1	1	154214	FALSE	0.272141	5.13754	-0.599408	5.00568	-3.10121	0.00268038	0.0738047	-1.66719	4.90934	5.15018
SSX5	All Targets	RNA	Endogenous	1	1	38	11	8.0164	1	1	6758	FALSE	0.366837	4.8581	-0.599235	4.69767	-3.15441	0.00228264	0.0701935	-1.53313	4.58985	4.85941
ETFBKMT	All Targets	RNA	Endogenous	1	1	44	10.5	7.58792	1	1	254013	FALSE	0.973817	4.80059	-0.5992	4.63002	-2.86271	0.00538924	0.0969203	-2.24884	4.49682	4.82983
VSIG4	All Targets	RNA	Endogenous	1	1	48	10	7.36763	1	1	11326	FALSE	0.517709	4.75653	-0.599169	4.57563	-2.98749	0.00375622	0.0837511	-1.94954	4.53281	4.63986
PTCRA	All Targets	RNA	Endogenous	1	1	48	17	11.2687	1	1	171558	FALSE	1.12427	5.28967	-0.59903	5.17144	-3.13082	0.00245164	0.0715578	-1.60041	4.97367	5.46809
CCDC28A-AS1	All Targets	RNA	Endogenous	1	1	32	10.5	8.17762	1	1	100507462	FALSE	0.214385	4.88026	-0.598948	4.70471	-3.08648	0.0028014	0.0748726	-1.70156	4.6124	4.84318
FMC1	All Targets	RNA	Endogenous	1	1	36	10	8.50816	1	1	154791	FALSE	0.15792	4.91641	-0.598914	4.76913	-3.21395	0.00190312	0.0650162	-1.36892	4.58116	5.05109
ZMYM1	All Targets	RNA	Endogenous	1	1	52	12.5	9.05013	1	1	79830	FALSE	0.154073	4.98728	-0.598887	4.84916	-3.29592	0.00147652	0.0581616	-1.15426	4.71292	5.05353
ARNT2	All Targets	RNA	Endogenous	1	1	67	15.5	11.154	1	1	9915	FALSE	0.176912	5.26136	-0.598847	5.13823	-3.20986	0.00193548	0.0654163	-1.41259	5.10288	5.19125
MAML2	All Targets	RNA	Endogenous	1	1	27	11.5	7.89335	1	1	84441	FALSE	0.0636574	4.82145	-0.598789	4.66349	-3.21527	0.00189541	0.0650162	-1.36522	4.47716	4.94298
CHRNB2	All Targets	RNA	Endogenous	1	1	32	8	6.85355	1	1	1141	FALSE	0.192774	4.66495	-0.598779	4.47648	-2.85363	0.00552967	0.0974064	-2.26208	4.32353	4.7059
CRISP2	All Targets	RNA	Endogenous	1	1	41	13	10.27	1	1	7180	FALSE	0.0277067	5.15446	-0.598603	5.02491	-3.34941	0.00124843	0.0557407	-1.01405	4.92238	5.17871
RHEBL1	All Targets	RNA	Endogenous	1	1	44	11.5	8.23463	1	1	121268	FALSE	0.348071	4.89855	-0.598333	4.74325	-3.17466	0.00214626	0.0678008	-1.47486	4.64947	4.88392
LITAFD	All Targets	RNA	Endogenous	1	1	52	13	9.33943	1	1	101929989	FALSE	0.073915	5.05319	-0.597983	4.90866	-3.20754	0.00194094	0.0654163	-1.39155	4.7711	5.11499
KLHL13	All Targets	RNA	Endogenous	1	1	37	10.5	6.61895	1	1	90293	FALSE	-0.0700197	4.65135	-0.597878	4.44972	-2.92943	0.00444843	0.0903415	-2.08349	4.31819	4.64702
HBB	All Targets	RNA	Endogenous	1	1	250	10	9.11962	1	1	3043	FALSE	2.28637	5.04111	-0.596742	4.88254	-2.90897	0.00471924	0.092627	-2.13551	4.6464	5.23676
KRTAP19-6	All Targets	RNA	Endogenous	1	1	34	7	6.39936	1	1	337973	FALSE	0.640979	4.60843	-0.596604	4.41186	-2.71889	0.00807287	0.112668	-2.57228	4.23577	4.67601
CEP97	All Targets	RNA	Endogenous	1	1	34	11.5	8.92727	1	1	79598	FALSE	-0.186211	4.97182	-0.596591	4.83682	-3.44781	0.000912928	0.0484103	-0.739706	4.69745	5.04587
OR7G2	All Targets	RNA	Endogenous	1	1	33	9	7.31162	1	1	390882	FALSE	0.290284	4.74376	-0.59612	4.57355	-3.21424	0.00190142	0.0650162	-1.36304	4.43655	4.77906
ARX	All Targets	RNA	Endogenous	1	1	31	11	8.58712	1	1	170302	FALSE	-0.354361	4.93777	-0.595429	4.79471	-3.51986	0.000723366	0.0437855	-0.538284	4.67195	4.97885
ZNF528	All Targets	RNA	Endogenous	1	1	38	14	9.81304	1	1	84436	FALSE	0.134716	5.09135	-0.595143	4.96085	-3.07999	0.00285629	0.0754346	-1.72674	4.83784	5.14537
WHRN	All Targets	RNA	Endogenous	1	1	36	15	10.1001	1	1	25861	FALSE	0.770611	5.13018	-0.594972	4.99147	-3.01855	0.00343275	0.0807486	-1.88771	4.86436	5.18214
VRK1	All Targets	RNA	Endogenous	1	1	36	10	8.03246	1	1	7443	FALSE	-0.251366	4.85044	-0.5946	4.696	-3.34151	0.00127989	0.0561668	-1.02817	4.60953	4.82572
VSTM2B	All Targets	RNA	Endogenous	1	1	49	12	7.69703	1	1	342865	FALSE	0.552116	4.82278	-0.594342	4.65464	-3.0038	0.00358057	0.0822923	-1.89939	4.43266	4.98762
SLCO4C1	All Targets	RNA	Endogenous	1	1	38	14	10.7654	1	1	353189	FALSE	0.638476	5.21012	-0.594298	5.08846	-3.28147	0.00154453	0.0592771	-1.20299	4.8769	5.4058
DRC3	All Targets	RNA	Endogenous	1	1	49	14	9.92459	1	1	83450	FALSE	-0.577623	5.11444	-0.594005	4.98365	-3.30744	0.00142434	0.0578653	-1.12385	4.77776	5.29247
UGT2B28	All Targets	RNA	Endogenous	1	1	34	8.5	6.95217	1	1	54490	FALSE	-0.130358	4.70119	-0.593781	4.51333	-3.05266	0.00309878	0.0777453	-1.77897	4.44902	4.60979
OR4A15	All Targets	RNA	Endogenous	1	1	38	10.5	7.68469	1	1	81328	FALSE	-0.0146673	4.80933	-0.593771	4.65034	-3.10414	0.00265691	0.0736142	-1.65573	4.5122	4.85754
TMEM17	All Targets	RNA	Endogenous	1	1	34	10	7.49631	1	1	200728	FALSE	0.102901	4.78323	-0.593737	4.61322	-2.99914	0.0036299	0.0826718	-1.91606	4.48228	4.80962
SLC25A45	All Targets	RNA	Endogenous	1	1	31	9.5	6.70605	1	1	283130	FALSE	0.514331	4.64898	-0.593405	4.46638	-3.02626	0.00335102	0.080344	-1.84287	4.28179	4.74327
PROSER2	All Targets	RNA	Endogenous	1	1	43	14	11.2927	1	1	254427	FALSE	0.0336612	5.2642	-0.59316	5.14308	-3.32774	0.00133653	0.0569767	-1.07393	5.01635	5.33317
C1QTNF9B	All Targets	RNA	Endogenous	1	1	35	12	9.02032	1	1	387911	FALSE	0.270456	4.98589	-0.592957	4.84115	-3.1019	0.0026748	0.0738047	-1.66842	4.70257	5.04903
GPR6	All Targets	RNA	Endogenous	1	1	24	9.5	7.79325	1	1	2830	FALSE	0.110773	4.81263	-0.592872	4.65087	-3.36249	0.00119795	0.0543939	-0.975415	4.56956	4.77283
LINGO2	All Targets	RNA	Endogenous	1	1	47	11	8.67342	1	1	158038	FALSE	-1.22069	4.94768	-0.59284	4.79621	-3.39353	0.00108572	0.0527877	-0.886095	4.66638	4.99096
CACHD1	All Targets	RNA	Endogenous	1	1	33	12	9.61609	1	1	57685	FALSE	-0.166361	5.07022	-0.592787	4.93024	-3.22035	0.00186605	0.0644823	-1.3585	4.84618	5.05633
KDM8	All Targets	RNA	Endogenous	1	1	34	12.5	8.19755	1	1	79831	FALSE	0.80888	4.88209	-0.592763	4.72632	-2.87042	0.00527626	0.0960375	-2.2372	4.63594	4.86188
CETN3	All Targets	RNA	Endogenous	1	1	33	11	8.96832	1	1	1070	FALSE	-0.55466	4.97714	-0.592637	4.83194	-3.23154	0.00180284	0.0639029	-1.32943	4.73132	4.98287
FAT3	All Targets	RNA	Endogenous	1	1	32	10.5	7.05703	1	1	120114	FALSE	0.554105	4.74644	-0.592459	4.54894	-2.56272	0.0129561	0.136928	-2.97254	4.36103	4.8308
EMID1	All Targets	RNA	Endogenous	1	1	34	9	6.38949	1	1	129080	FALSE	0.236058	4.61048	-0.592267	4.40237	-3.07011	0.00294188	0.0760252	-1.7348	4.35396	4.475
MAP6D1	All Targets	RNA	Endogenous	1	1	42	11	7.91417	1	1	79929	FALSE	0.259632	4.84056	-0.591575	4.68198	-3.29528	0.00147948	0.0581616	-1.15647	4.61116	4.78821
MMP23B	All Targets	RNA	Endogenous	1	1	26	5	5.16663	1	1	8510	FALSE	0.683678	4.35765	-0.591337	4.11307	-2.72649	0.00789826	0.11174	-2.55573	4.09033	4.14717
MAPKAP1	All Targets	RNA	Endogenous	1	1	57	14.5	10.4305	1	1	79109	FALSE	0.541118	5.16683	-0.591066	5.02936	-2.79544	0.00666661	0.103162	-2.43851	4.84738	5.30233
CTXND2	All Targets	RNA	Endogenous	1	1	30	7.5	6.27642	1	1	100996521	FALSE	0.802019	4.58963	-0.590542	4.37657	-2.69319	0.00871122	0.116223	-2.64164	4.22855	4.59859
TAS2R46	All Targets	RNA	Endogenous	1	1	48	15	11.2683	1	1	259292	FALSE	0.195195	5.26621	-0.590437	5.14763	-3.10418	0.00265656	0.0736142	-1.6758	5.00469	5.36205
GNG8	All Targets	RNA	Endogenous	1	1	37	11	7.97816	1	1	94235	FALSE	0.561772	4.8605	-0.590345	4.69673	-2.86042	0.00543664	0.0970639	-2.26436	4.60856	4.82898
FTMT	All Targets	RNA	Endogenous	1	1	32	9.5	6.95184	1	1	94033	FALSE	-0.177732	4.67802	-0.590217	4.5047	-3.12106	0.00252493	0.0724082	-1.5999	4.29373	4.82116
HACD1	All Targets	RNA	Endogenous	1	1	37	8	5.96856	1	1	9200	FALSE	0.119931	4.5423	-0.5902	4.31715	-2.66519	0.00935111	0.118953	-2.6905	4.175	4.53038
ANKRD1	All Targets	RNA	Endogenous	1	1	30	10	7.88449	1	1	27063	FALSE	-0.666881	4.83006	-0.590066	4.6604	-3.09938	0.00269517	0.0739721	-1.65922	4.52851	4.85822
KIAA1958	All Targets	RNA	Endogenous	1	1	46	12.5	9.76506	1	1	158405	FALSE	0.158454	5.08415	-0.589975	4.94995	-2.97625	0.00388192	0.0852865	-1.97449	4.72492	5.2875
ARPP21	All Targets	RNA	Endogenous	1	1	33	10.5	6.62752	1	1	10777	FALSE	0.834494	4.65454	-0.589739	4.45161	-2.55263	0.0127131	0.136563	-2.93398	4.36844	4.57638
EPHA10	All Targets	RNA	Endogenous	1	1	37	11	9.51207	1	1	284656	FALSE	0.455879	5.05889	-0.589568	4.91825	-3.1376	0.0024019	0.0707869	-1.5776	4.79154	5.10833
ZNF677	All Targets	RNA	Endogenous	1	1	29	8.5	7.06603	1	1	342926	FALSE	0.031737	4.70459	-0.589497	4.53172	-3.29341	0.00148813	0.0581616	-1.15726	4.40664	4.71934
SPRR1A	All Targets	RNA	Endogenous	1	1	75	9.5	8.09782	1	1	6698	FALSE	1.00812	4.87204	-0.589173	4.7102	-2.41213	0.0196023	0.165692	-3.30766	4.47824	5.05814
LHX6	All Targets	RNA	Endogenous	1	1	31	10.5	7.00673	1	1	26468	FALSE	-0.0579546	4.71477	-0.58865	4.53155	-3.10364	0.00266085	0.0736142	-1.65467	4.47382	4.61815
POLR3H	All Targets	RNA	Endogenous	1	1	40	14.5	9.93139	1	1	171568	FALSE	0.183579	5.11265	-0.5882	4.98409	-3.39033	0.00109684	0.0531848	-0.908295	4.8927	5.12118
NTN3	All Targets	RNA	Endogenous	1	1	31	7.5	6.38689	1	1	4917	FALSE	0.879961	4.59512	-0.588003	4.39077	-2.71421	0.00817055	0.112762	-2.58014	4.20205	4.67387
TMEM270	All Targets	RNA	Endogenous	1	1	38	10.5	7.53444	1	1	135886	FALSE	1.17847	4.79599	-0.587975	4.62648	-2.98336	0.0038019	0.08421	-1.95894	4.42094	4.9348
RASAL2	All Targets	RNA	Endogenous	1	4	54	16.5	15.4072	1	1	9462	FALSE	-0.531163	5.64566	-0.587888	5.55249	-3.6329	0.000499169	0.0372153	-0.226063	5.47463	5.66927
CCDC105	All Targets	RNA	Endogenous	1	1	44	7	5.46848	1	1	126402	FALSE	0.598968	4.4478	-0.587877	4.20091	-2.69653	0.00860847	0.115533	-2.63208	4.10476	4.34514
DMRT2	All Targets	RNA	Endogenous	1	1	35	11.5	7.9405	1	1	10655	FALSE	0.135321	4.84504	-0.587816	4.6857	-3.22574	0.00183536	0.0639724	-1.34098	4.60201	4.81124
MBD5	All Targets	RNA	Endogenous	1	1	45	12	9.87841	1	1	55777	FALSE	-0.0315385	5.09519	-0.587781	4.96298	-3.11385	0.00258043	0.0731851	-1.63993	4.7999	5.20762
IFFO2	All Targets	RNA	Endogenous	1	1	34	13	9.54275	1	1	126917	FALSE	0.474942	5.05832	-0.587627	4.9183	-3.06846	0.00295635	0.0760723	-1.75309	4.83236	5.04721
GNLY	All Targets	RNA	Endogenous	1	1	29	9.5	6.52083	1	1	10578	FALSE	0.290799	4.61753	-0.587515	4.42744	-2.91173	0.00468181	0.0922555	-2.12596	4.30336	4.61356
OR7A17	All Targets	RNA	Endogenous	1	1	33	10	7.05659	1	1	26333	FALSE	0.447598	4.7217	-0.587466	4.53781	-3.03286	0.00328627	0.079638	-1.83309	4.39828	4.7471
NAV1	All Targets	RNA	Endogenous	1	1	25	8.5	6.88258	1	1	89796	FALSE	0.89229	4.68217	-0.587421	4.48521	-2.52861	0.0138272	0.141312	-3.0137	4.38684	4.63275
CNTNAP4	All Targets	RNA	Endogenous	1	1	39	9.5	7.22706	1	1	85445	FALSE	0.0933863	4.7421	-0.586477	4.5612	-2.99281	0.00369805	0.0833576	-1.92954	4.37586	4.83923
SH2D6	All Targets	RNA	Endogenous	1	1	34	8	7.9857	1	1	284948	FALSE	-0.48928	4.84016	-0.586311	4.67697	-3.22174	0.00185811	0.0643312	-1.34875	4.55151	4.86517
IL17F	All Targets	RNA	Endogenous	1	1	58	13	8.94395	1	1	112744	FALSE	0.0945906	5.00805	-0.586264	4.8631	-3.17022	0.00217551	0.0680703	-1.4942	4.81247	4.93905
ITGBL1	All Targets	RNA	Endogenous	1	1	38	10	7.72588	1	1	9358	FALSE	0.297508	4.81431	-0.586136	4.63942	-2.81227	0.00621692	0.099931	-2.35865	4.49006	4.86346
MRGPRX2	All Targets	RNA	Endogenous	1	1	36	11.5	8.28289	1	1	117194	FALSE	0.275504	4.88635	-0.586047	4.73183	-2.95835	0.00409016	0.0871825	-2.02052	4.57945	4.96041
POLA2	All Targets	RNA	Endogenous	1	1	38	14	9.48913	1	1	23649	FALSE	-0.592632	5.05609	-0.585743	4.91682	-3.33059	0.00132461	0.0568888	-1.0576	4.77644	5.12738
MYOM3	All Targets	RNA	Endogenous	1	1	60	12	10.4123	1	1	127294	FALSE	0.596916	5.16992	-0.585708	5.0503	-3.34386	0.00127049	0.0561668	-1.03476	4.88011	5.30558
OR5AS1	All Targets	RNA	Endogenous	1	1	34	8	6.15962	1	1	219447	FALSE	0.961856	4.5548	-0.58555	4.35521	-2.91439	0.00464605	0.0920939	-2.12001	4.18741	4.60693
DLGAP1	All Targets	RNA	Endogenous	1	1	47	12	9.35318	1	1	9229	FALSE	0.621122	5.04457	-0.5855	4.89665	-2.91134	0.00469261	0.0923068	-2.14802	4.79159	5.05424
SLC25A30	All Targets	RNA	Endogenous	1	1	36	13	9.68557	1	1	253512	FALSE	-0.140601	5.08623	-0.585353	4.952	-3.23544	0.00178129	0.0639029	-1.32358	4.82279	5.14581
ATAD5	All Targets	RNA	Endogenous	1	1	35	12	8.27388	1	1	79915	FALSE	0.243398	4.89541	-0.585239	4.73774	-3.02512	0.00336234	0.080344	-1.85208	4.5453	5.0264
GPRC5B	All Targets	RNA	Endogenous	1	1	132	13	9.36607	1	1	51704	FALSE	0.929408	5.08039	-0.585222	4.92063	-2.57879	0.0120411	0.133294	-2.90562	4.66438	5.305
CACNA1S	All Targets	RNA	Endogenous	1	1	29	10	6.78172	1	1	779	FALSE	0.494703	4.66385	-0.585203	4.46989	-2.84627	0.00564659	0.0976173	-2.28484	4.39161	4.58732
FOXS1	All Targets	RNA	Endogenous	1	1	45	15	10.1617	1	1	2307	FALSE	-0.143025	5.15688	-0.585172	5.01883	-3.23162	0.00180242	0.0639029	-1.33049	4.88121	5.22525
THOC6	All Targets	RNA	Endogenous	1	3	63	16.5	15.0822	1	1	79228	FALSE	-0.0501257	5.62177	-0.585131	5.52886	-3.47555	0.000834977	0.0476519	-0.681965	5.40808	5.71003
CHM	All Targets	RNA	Endogenous	1	1	25	8	6.29585	1	1	1121	FALSE	0.645042	4.58601	-0.584622	4.37983	-2.77003	0.00699888	0.106	-2.45724	4.22366	4.61409
ENPP6	All Targets	RNA	Endogenous	1	1	31	13	8.42511	1	1	133121	FALSE	-0.0846086	4.91915	-0.584197	4.76118	-2.95883	0.00408442	0.0871825	-2.02284	4.61974	4.97334
SPATA31D1	All Targets	RNA	Endogenous	1	1	39	11.5	9.11512	1	1	389763	FALSE	0.335616	5.02316	-0.583289	4.874	-3.2435	0.00173753	0.0630614	-1.30277	4.7639	5.03915
PEAK3	All Targets	RNA	Endogenous	1	1	37	11.5	7.521	1	1	374872	FALSE	0.229338	4.79021	-0.58328	4.61079	-3.01466	0.00346785	0.0811695	-1.87802	4.48415	4.80074
CST5	All Targets	RNA	Endogenous	1	1	44	13	9.13064	1	1	1473	FALSE	0.889841	5.01296	-0.58325	4.87285	-2.77037	0.00704808	0.106477	-2.48129	4.66382	5.1864
THAP3	All Targets	RNA	Endogenous	1	1	40	11	8.4662	1	1	90326	FALSE	-0.685706	4.92591	-0.583203	4.77292	-3.17804	0.00212424	0.0674207	-1.45834	4.60401	5.02629
GPR155	All Targets	RNA	Endogenous	1	1	39	12	8.06265	1	1	151556	FALSE	0.382795	4.86408	-0.583174	4.71093	-3.08778	0.00279054	0.0748726	-1.70147	4.62215	4.84409
TMEM147	All Targets	RNA	Endogenous	1	1	61	13	10.9068	1	1	10430	FALSE	0.700312	5.24594	-0.583091	5.11558	-2.81321	0.00627206	0.099931	-2.39151	4.90798	5.42697
OXA1L	All Targets	RNA	Endogenous	1	1	75	14	10.5554	1	1	5018	FALSE	0.420603	5.19978	-0.582987	5.07021	-3.08544	0.00281011	0.0748726	-1.72434	4.94259	5.26164
NHLRC1	All Targets	RNA	Endogenous	1	1	39	12	9.42609	1	1	378884	FALSE	0.112758	5.04144	-0.582904	4.90413	-3.15683	0.0022659	0.070107	-1.52627	4.82045	5.02967
PDE1B	All Targets	RNA	Endogenous	1	1	40	14	9.20793	1	1	5153	FALSE	0.509551	5.03236	-0.58261	4.89326	-3.08945	0.00277656	0.0748726	-1.70379	4.76811	5.08098
ALPK2	All Targets	RNA	Endogenous	1	1	39	12	8.42942	1	1	115701	FALSE	-0.0133564	4.91897	-0.582609	4.77239	-3.13003	0.00245752	0.071608	-1.59312	4.61935	5.00195
TSPAN10	All Targets	RNA	Endogenous	1	1	34	6.5	5.6487	1	1	83882	FALSE	-0.278062	4.44974	-0.582345	4.22684	-2.84895	0.00560373	0.0976173	-2.26011	4.07736	4.45105
CATSPERB	All Targets	RNA	Endogenous	1	1	27	9	6.78798	1	1	79820	FALSE	0.284851	4.65478	-0.582252	4.46672	-2.8316	0.0058865	0.0988886	-2.30296	4.28828	4.7344
PRCP	All Targets	RNA	Endogenous	1	1	45	13	10.6165	1	1	5547	FALSE	-0.517828	5.18381	-0.581486	5.05681	-3.22969	0.00181319	0.0639029	-1.3401	4.96761	5.19061
LGALS12	All Targets	RNA	Endogenous	1	1	43	10.5	7.89543	1	1	85329	FALSE	0.136485	4.83525	-0.581357	4.67344	-2.82763	0.00595295	0.0991548	-2.32425	4.44497	5.01614
PPFIBP2	All Targets	RNA	Endogenous	1	1	43	15.5	12.3929	1	1	8495	FALSE	0.0250082	5.37562	-0.581259	5.26141	-3.27579	0.00157205	0.059824	-1.2264	5.14902	5.43
CERS4	All Targets	RNA	Endogenous	1	1	52	11.5	8.95418	1	1	79603	FALSE	0.151586	5.01051	-0.581063	4.85145	-3.05779	0.00305183	0.0770054	-1.77865	4.72482	5.0414
SGCZ	All Targets	RNA	Endogenous	1	1	26	8.5	6.58596	1	1	137868	FALSE	0.570431	4.63824	-0.580972	4.4482	-2.87337	0.00522689	0.0957917	-2.22228	4.35937	4.58145
ATP1A2	All Targets	RNA	Endogenous	1	1	36	12	7.86997	1	1	477	FALSE	-0.432301	4.85413	-0.580905	4.68652	-3.14952	0.00231675	0.0705119	-1.53685	4.51887	4.93799
ZFP69B	All Targets	RNA	Endogenous	1	1	47	15	11.0139	1	1	65243	FALSE	1.212	5.25048	-0.580899	5.13008	-3.00213	0.00359815	0.0824694	-1.92539	4.93668	5.42017
NRP2	All Targets	RNA	Endogenous	1	1	55	13	11.5833	1	1	8828	FALSE	1.18419	5.30484	-0.580665	5.18965	-3.16182	0.00223184	0.0695301	-1.52313	5.03495	5.42171
DDHD1	All Targets	RNA	Endogenous	1	1	44	10	8.30614	1	1	80821	FALSE	0.763819	4.90192	-0.58047	4.74465	-2.97377	0.00391018	0.0852865	-1.99295	4.58422	4.9853
PRPH	All Targets	RNA	Endogenous	1	1	42	7	5.76223	1	1	5630	FALSE	0.472444	4.48659	-0.580445	4.26506	-2.73321	0.00775292	0.110639	-2.54537	4.20645	4.35298
FOXN2	All Targets	RNA	Endogenous	1	1	56	14	9.76269	1	1	3344	FALSE	0.861296	5.10513	-0.580221	4.96293	-2.6136	0.0114973	0.130597	-2.89682	4.87922	5.0885
GCK	All Targets	RNA	Endogenous	1	1	38	12.5	8.86799	1	1	2645	FALSE	-0.0187164	4.9772	-0.58006	4.8256	-3.06234	0.00301081	0.0768162	-1.75939	4.66863	5.06106
GABRA5	All Targets	RNA	Endogenous	1	1	41	10	7.72321	1	1	2558	FALSE	-0.0169838	4.8065	-0.579884	4.64809	-3.19504	0.00201676	0.0659596	-1.41923	4.50874	4.85713
DTWD2	All Targets	RNA	Endogenous	1	1	35	10	7.36103	1	1	285605	FALSE	0.843091	4.7671	-0.579737	4.58818	-2.82734	0.00595874	0.0991548	-2.34089	4.47423	4.75909
ABCA6	All Targets	RNA	Endogenous	1	1	48	9	7.48047	1	1	23460	FALSE	0.56096	4.77378	-0.579535	4.60252	-2.99362	0.00368925	0.0833576	-1.92998	4.48374	4.78069
LCN9	All Targets	RNA	Endogenous	1	1	43	14.5	9.75629	1	1	392399	FALSE	-0.121745	5.08746	-0.579275	4.95835	-3.14614	0.00234059	0.0706151	-1.56116	4.87313	5.08619
ARHGAP45	All Targets	RNA	Endogenous	1	1	40	17.5	10.0795	1	1	23526	FALSE	0.206217	5.12916	-0.578931	5.00486	-3.19597	0.00201098	0.0659596	-1.43053	4.84764	5.2407
TTLL10	All Targets	RNA	Endogenous	1	1	44	9	7.35148	1	1	254173	FALSE	0.500136	4.76466	-0.578616	4.5842	-2.93567	0.0043687	0.0899573	-2.08606	4.61593	4.53662
PALMD	All Targets	RNA	Endogenous	1	1	36	11.5	8.78318	1	1	54873	FALSE	0.410381	4.97603	-0.578415	4.83222	-3.0859	0.00280629	0.0748726	-1.70657	4.69406	5.03945
CXCL6	All Targets	RNA	Endogenous	1	1	35	9.5	8.02187	1	1	6372	FALSE	-0.528405	4.86322	-0.57825	4.69673	-3.00373	0.0035813	0.0822923	-1.9017	4.526	4.95283
DNASE1	All Targets	RNA	Endogenous	1	1	46	9.5	8.48751	1	1	1773	FALSE	0.700681	4.91347	-0.578217	4.76054	-2.67671	0.00933748	0.118953	-2.71861	4.71719	4.82557
PRKAA2	All Targets	RNA	Endogenous	1	1	35	12.5	9.49424	1	1	5563	FALSE	0.243456	5.05667	-0.578203	4.91238	-2.83378	0.00587551	0.0988886	-2.33692	4.79701	5.08543
FAM229B	All Targets	RNA	Endogenous	1	1	51	9.5	7.3651	1	1	619208	FALSE	0.537877	4.77295	-0.578199	4.58892	-2.82884	0.00593276	0.0991548	-2.328	4.43701	4.81679
VTCN1	All Targets	RNA	Endogenous	1	1	46	15	10.2575	1	1	79679	FALSE	-0.315169	5.15541	-0.578051	5.02009	-2.91963	0.00458163	0.091521	-2.13331	4.9327	5.15117
C1orf94	All Targets	RNA	Endogenous	1	1	36	9.5	7.89708	1	1	84970	FALSE	0.465715	4.84177	-0.578049	4.67435	-2.84013	0.00574597	0.0981253	-2.30718	4.46204	4.99283
ACACB	All Targets	RNA	Endogenous	1	1	45	13	9.35306	1	1	32	FALSE	0.421909	5.04819	-0.577905	4.90819	-3.01759	0.00343802	0.0807486	-1.88527	4.78411	5.09431
CCDC140	All Targets	RNA	Endogenous	1	1	28	10.5	7.63656	1	1	151278	FALSE	-0.765215	4.79653	-0.577845	4.62968	-3.0219	0.00339454	0.0805571	-1.84938	4.42521	4.93638
C16orf54	All Targets	RNA	Endogenous	1	1	46	9.5	7.23095	1	1	283897	FALSE	-0.68337	4.76178	-0.577811	4.56926	-3.07153	0.00292939	0.07592	-1.72727	4.4385	4.7654
GRM2	All Targets	RNA	Endogenous	1	1	45	10	8.51999	1	1	2912	FALSE	0.491753	4.93539	-0.577797	4.76854	-2.86621	0.00533493	0.0964298	-2.25122	4.70126	4.86946
HLX	All Targets	RNA	Endogenous	1	1	39	12	9.07821	1	1	3142	FALSE	0.0356386	4.99932	-0.577676	4.85838	-3.10075	0.00268411	0.0738047	-1.6663	4.74441	5.02934
DNAL1	All Targets	RNA	Endogenous	1	1	34	10	8.69877	1	1	83544	FALSE	0.501972	4.94515	-0.577345	4.78111	-2.88178	0.00510269	0.0947216	-2.21202	4.70337	4.89771
DCAF4L2	All Targets	RNA	Endogenous	1	1	48	10	7.17964	1	1	138009	FALSE	0.757945	4.74536	-0.577031	4.56281	-2.86329	0.00537953	0.0968422	-2.25326	4.52087	4.62571
TCF7L1	All Targets	RNA	Endogenous	1	1	43	9.5	7.77911	1	1	83439	FALSE	0.0145547	4.83177	-0.576721	4.65722	-3.09749	0.00271044	0.0739935	-1.67226	4.53771	4.83648
TPTE	All Targets	RNA	Endogenous	1	1	30	10	6.54343	1	1	7179	FALSE	-0.281852	4.62516	-0.575692	4.43525	-3.09211	0.00275456	0.0747571	-1.67908	4.33434	4.58662
LHFPL6	All Targets	RNA	Endogenous	1	1	33	12	9.27862	1	1	10186	FALSE	0.236713	5.0333	-0.575545	4.88869	-3.02373	0.00337625	0.080344	-1.86518	4.75348	5.0915
DNAAF4	All Targets	RNA	Endogenous	1	1	41	13	8.96731	1	1	161582	FALSE	0.69265	4.99555	-0.575206	4.8503	-3.02377	0.00337584	0.080344	-1.86421	4.66322	5.13093
PURG	All Targets	RNA	Endogenous	1	1	142	11.5	8.11978	1	1	29942	FALSE	0.765286	4.8965	-0.575177	4.73359	-2.36744	0.0218416	0.172495	-3.39922	4.60737	4.92293
PDE6B	All Targets	RNA	Endogenous	1	1	31	11.5	8.18955	1	1	5158	FALSE	1.00226	4.8881	-0.575115	4.71416	-2.29295	0.0262684	0.186989	-3.53885	4.58758	4.90404
TOMM20L	All Targets	RNA	Endogenous	1	1	37	9.5	8.0243	1	1	387990	FALSE	-0.728917	4.86675	-0.57501	4.70114	-3.13885	0.00239283	0.0707869	-1.56367	4.55892	4.91446
BTBD17	All Targets	RNA	Endogenous	1	1	37	8	5.95683	1	1	388419	FALSE	0.398466	4.51176	-0.57483	4.30136	-2.69674	0.00857237	0.115276	-2.62942	4.23171	4.40584
TTC36	All Targets	RNA	Endogenous	1	1	51	11	8.48558	1	1	143941	FALSE	-0.309307	4.9292	-0.574636	4.77705	-3.0827	0.0028333	0.0753791	-1.70569	4.64384	4.97686
LRRC29	All Targets	RNA	Endogenous	1	1	32	10.5	7.57164	1	1	26231	FALSE	0.109171	4.78953	-0.574618	4.62229	-3.10084	0.00268336	0.0738047	-1.66194	4.51536	4.78269
REG1B	All Targets	RNA	Endogenous	1	1	42	13	9.21281	1	1	5968	FALSE	-0.649279	5.02362	-0.574449	4.87786	-3.20762	0.00194049	0.0654163	-1.39219	4.81524	4.9718
SLC7A14	All Targets	RNA	Endogenous	1	1	39	10.5	8.01005	1	1	57709	FALSE	-0.861553	4.86312	-0.574359	4.69658	-3.06926	0.00294937	0.0760723	-1.73941	4.55007	4.91635
BIN2	All Targets	RNA	Endogenous	1	1	43	11	8.07094	1	1	51411	FALSE	0.624421	4.86963	-0.574347	4.69972	-2.89382	0.00492951	0.0938028	-2.18701	4.7176	4.67289
RYR1	All Targets	RNA	Endogenous	1	1	37	11	7.72574	1	1	6261	FALSE	0.324337	4.8078	-0.574133	4.63295	-2.95759	0.0040992	0.0871825	-2.01817	4.53179	4.78469
FAM13C	All Targets	RNA	Endogenous	1	1	28	12	7.52144	1	1	220965	FALSE	0.98113	4.79662	-0.573917	4.63254	-2.81786	0.0061196	0.0995359	-2.3518	4.46375	4.88572
GLI1	All Targets	RNA	Endogenous	1	1	45	10.5	8.61879	1	1	2735	FALSE	0.0381414	4.93967	-0.573513	4.78732	-3.03067	0.00330764	0.0799748	-1.84403	4.74535	4.85028
RLBP1	All Targets	RNA	Endogenous	1	1	36	9	7.31303	1	1	6017	FALSE	0.0643561	4.75514	-0.572985	4.58593	-3.06509	0.00298625	0.0764194	-1.75279	4.45916	4.77609
GDF7	All Targets	RNA	Endogenous	1	1	40	8.5	5.70951	1	1	151449	FALSE	-0.474849	4.46502	-0.572897	4.24494	-2.81675	0.00613885	0.0997591	-2.33602	4.08045	4.49167
FGG	All Targets	RNA	Endogenous	1	1	27	7	5.42588	1	1	2266	FALSE	0.469172	4.43317	-0.572711	4.18627	-2.58053	0.0117443	0.13174	-2.87737	4.06185	4.3729
UBE3D	All Targets	RNA	Endogenous	1	1	33	9.5	7.60433	1	1	90025	FALSE	0.0100266	4.79239	-0.572628	4.62055	-2.99007	0.00372791	0.0836368	-1.93472	4.46111	4.85972
ZMYM6	All Targets	RNA	Endogenous	1	1	41	8.5	6.76263	1	1	9204	FALSE	0.0682084	4.65317	-0.572381	4.46386	-2.83129	0.00589167	0.0988886	-2.30828	4.32479	4.67246
MYH13	All Targets	RNA	Endogenous	1	1	44	11	8.95315	1	1	8735	FALSE	0.223145	4.98684	-0.572084	4.84217	-3.06848	0.00295618	0.0760723	-1.75366	4.7385	4.99767
PREX1	All Targets	RNA	Endogenous	1	1	42	13.5	10.2677	1	1	57580	FALSE	0.333727	5.14743	-0.571664	5.03025	-3.29616	0.00147542	0.0581616	-1.1696	4.96836	5.12309
INS	All Targets	RNA	Endogenous	1	1	43	10.5	8.29849	1	1	3630	FALSE	-0.0505931	4.89739	-0.57161	4.738	-3.14853	0.00232373	0.0705119	-1.54097	4.60975	4.93038
CPA6	All Targets	RNA	Endogenous	1	1	48	11.5	8.31136	1	1	57094	FALSE	-0.008051	4.90164	-0.571524	4.74175	-2.91619	0.00462202	0.0917535	-2.12263	4.58633	4.97489
ZNF143	All Targets	RNA	Endogenous	1	1	41	13	9.52333	1	1	7702	FALSE	0.115609	5.0578	-0.570683	4.92244	-3.14148	0.00237386	0.0706594	-1.56057	4.80586	5.09731
RNF152	All Targets	RNA	Endogenous	1	1	54	12.5	9.85232	1	1	220441	FALSE	-0.272714	5.09804	-0.570647	4.96301	-3.36812	0.00117682	0.0543939	-0.966016	4.86554	5.10922
KIF25	All Targets	RNA	Endogenous	1	1	23	8	5.8961	1	1	3834	FALSE	0.00191605	4.4964	-0.570413	4.29247	-2.87275	0.0052362	0.0957917	-2.20802	4.13466	4.52919
CCL5	All Targets	RNA	Endogenous	1	1	26	10	8.03325	1	1	6352	FALSE	0.218182	4.85392	-0.570363	4.69041	-2.74855	0.00743746	0.108805	-2.52518	4.52746	4.93484
APLN	All Targets	RNA	Endogenous	1	1	40	9.5	7.00979	1	1	8862	FALSE	-0.303922	4.70534	-0.570308	4.52573	-3.05238	0.00310133	0.0777453	-1.7758	4.38126	4.74244
RET	All Targets	RNA	Endogenous	1	1	35	10	7.86013	1	1	5979	FALSE	0.205527	4.83493	-0.570217	4.65539	-2.90799	0.00473265	0.092627	-2.13768	4.59143	4.75132
OR5P2	All Targets	RNA	Endogenous	1	1	39	11	7.70874	1	1	120065	FALSE	0.262623	4.81591	-0.569989	4.65011	-2.81505	0.00616839	0.099931	-2.36616	4.46607	4.92616
AFAP1L1	All Targets	RNA	Endogenous	1	1	34	11	8.24949	1	1	134265	FALSE	0.445494	4.90356	-0.569843	4.74699	-2.96038	0.004066	0.0871825	-2.02261	4.67636	4.85294
OR2V1	All Targets	RNA	Endogenous	1	1	36	9	7.37672	1	1	26693	FALSE	0.782182	4.7681	-0.569542	4.57974	-2.77183	0.0069707	0.105825	-2.4745	4.52131	4.66739
DEFB118	All Targets	RNA	Endogenous	1	1	37	12	7.76652	1	1	117285	FALSE	0.625676	4.82731	-0.569041	4.66288	-2.93225	0.00441226	0.0902362	-2.08745	4.57587	4.7934
OR2AG1	All Targets	RNA	Endogenous	1	1	31	14	10.5994	1	1	144125	FALSE	-0.439875	5.17853	-0.569018	5.05667	-3.30005	0.00145759	0.0581616	-1.14886	4.90486	5.28439
HCRTR1	All Targets	RNA	Endogenous	1	1	26	8	7.23826	1	1	3061	FALSE	-0.0602412	4.73151	-0.568837	4.54956	-2.80448	0.00635479	0.10042	-2.39077	4.4315	4.72665
STMN2	All Targets	RNA	Endogenous	1	1	40	11.5	7.44847	1	1	11075	FALSE	-0.496515	4.79256	-0.568783	4.61918	-3.00693	0.00354768	0.0821477	-1.89304	4.46451	4.85117
CPN1	All Targets	RNA	Endogenous	1	1	35	12.5	10.1521	1	1	1369	FALSE	-0.0782373	5.13082	-0.567947	4.99552	-3.09898	0.00269839	0.0739721	-1.68516	4.88436	5.16226
POLR1E	All Targets	RNA	Endogenous	1	1	40	13.5	10.1297	1	1	64425	FALSE	0.0607635	5.13573	-0.567911	5.00351	-3.04477	0.00317225	0.0783426	-1.821	4.94065	5.09781
FLACC1	All Targets	RNA	Endogenous	1	1	23	9.5	6.74801	1	1	130540	FALSE	0.202518	4.65405	-0.5678	4.46309	-2.85835	0.0054558	0.0970639	-2.25738	4.35793	4.62084
EGFL6	All Targets	RNA	Endogenous	1	1	33	10	8.02469	1	1	25975	FALSE	-0.394268	4.85805	-0.567796	4.69691	-2.9578	0.00409661	0.0871825	-2.01732	4.52209	4.95914
PRAC1	All Targets	RNA	Endogenous	1	1	55	18.5	13.054	1	1	84366	FALSE	0.340345	5.45283	-0.567406	5.35704	-3.29394	0.00148568	0.0581616	-1.17853	5.26471	5.49553
TAF1L	All Targets	RNA	Endogenous	1	1	25	10.5	7.58923	1	1	138474	FALSE	0.541053	4.79733	-0.567396	4.63032	-2.9418	0.00429176	0.0887785	-2.06367	4.4834	4.85068
RFPL2	All Targets	RNA	Endogenous	1	1	48	12.5	9.15835	1	1	10739	FALSE	0.476614	5.02859	-0.567158	4.87366	-2.92616	0.00449074	0.0905791	-2.11528	4.77147	5.02695
BRD3OS	All Targets	RNA	Endogenous	1	1	49	10.5	8.09176	1	1	266655	FALSE	0.197971	4.86617	-0.567082	4.70265	-2.84752	0.00562662	0.0976173	-2.28334	4.60322	4.8518
RAI2	All Targets	RNA	Endogenous	1	1	41	8	6.56738	1	1	10742	FALSE	0.457565	4.62235	-0.566988	4.4339	-2.74214	0.00756357	0.109496	-2.52355	4.27145	4.67758
LLGL1	All Targets	RNA	Endogenous	1	1	32	12	10.4069	1	1	3996	FALSE	0.250917	5.16095	-0.566673	5.02736	-2.86143	0.00540814	0.0970103	-2.26946	4.90197	5.21545
OR7C2	All Targets	RNA	Endogenous	1	1	35	11	8.32199	1	1	26658	FALSE	-0.111724	4.89297	-0.566479	4.74884	-3.13632	0.00241125	0.0707913	-1.57023	4.57964	5.00264
DNHD1	All Targets	RNA	Endogenous	1	1	48	12.5	10.4429	1	1	144132	FALSE	-0.205906	5.16339	-0.566413	5.0375	-3.07019	0.00294116	0.0760252	-1.75173	4.87412	5.28257
C19orf71	All Targets	RNA	Endogenous	1	1	21	8.5	6.21427	1	1	100128569	FALSE	-0.360396	4.56262	-0.566282	4.35917	-2.98804	0.00375011	0.0837511	-1.9376	4.25488	4.51562
ZNF791	All Targets	RNA	Endogenous	1	1	60	14	11.957	1	1	163049	FALSE	-0.207378	5.32729	-0.566267	5.2126	-3.15565	0.00227404	0.0701182	-1.54297	5.08295	5.40707
ENDOU	All Targets	RNA	Endogenous	1	1	37	10	7.26369	1	1	8909	FALSE	0.0990873	4.75218	-0.566093	4.57012	-2.82808	0.00594545	0.0991548	-2.32601	4.46216	4.73208
EIF5A2	All Targets	RNA	Endogenous	1	1	43	10	8.58733	1	1	56648	FALSE	0.865267	4.9425	-0.566064	4.78811	-2.52196	0.014136	0.143132	-3.05062	4.56741	5.11915
DEPDC4	All Targets	RNA	Endogenous	1	1	37	10.5	8.99786	1	1	120863	FALSE	0.00517641	4.98522	-0.566055	4.83714	-3.02105	0.00340307	0.0805571	-1.86946	4.72668	5.00284
ELP6	All Targets	RNA	Endogenous	1	1	47	12	9.51614	1	1	54859	FALSE	0.0848102	5.05682	-0.566018	4.92353	-3.04585	0.00316211	0.0782496	-1.81018	4.76927	5.15492
TIFA	All Targets	RNA	Endogenous	1	1	29	9	8.11359	1	1	92610	FALSE	0.0768402	4.85838	-0.565847	4.7041	-2.98756	0.00375542	0.0837511	-1.94167	4.46364	5.06478
WFDC10A	All Targets	RNA	Endogenous	1	1	31	10	7.5696	1	1	140832	FALSE	-0.27648	4.78338	-0.565775	4.61915	-3.4705	0.000848667	0.0476519	-0.674976	4.56629	4.69843
KRTAP21-3	All Targets	RNA	Endogenous	1	1	23	7	5.53145	1	1	100288323	FALSE	0.0598334	4.42746	-0.565402	4.19601	-2.73777	0.00765567	0.110344	-2.52383	4.11325	4.32015
MIR9-1HG	All Targets	RNA	Endogenous	1	1	30	8.5	6.78633	1	1	10485	FALSE	0.896872	4.67932	-0.565304	4.47798	-2.65584	0.00961162	0.120734	-2.73166	4.35507	4.66233
RECK	All Targets	RNA	Endogenous	1	1	27	13	8.45667	1	1	8434	FALSE	-0.429114	4.91212	-0.564963	4.76868	-3.18553	0.00207622	0.0666753	-1.44999	4.67404	4.91064
MYPOP	All Targets	RNA	Endogenous	1	1	66	14	8.88247	1	1	339344	FALSE	0.738069	4.99217	-0.564908	4.84499	-2.71744	0.00833878	0.114277	-2.63947	4.84115	4.85075
CHGB	All Targets	RNA	Endogenous	1	1	84	14	10.0575	1	1	1114	FALSE	-0.197416	5.16331	-0.564805	5.02596	-3.10626	0.00264001	0.0736142	-1.66087	4.87605	5.25082
TRMT44	All Targets	RNA	Endogenous	1	1	53	12.5	9.60665	1	1	152992	FALSE	0.302754	5.06937	-0.564713	4.93859	-2.97211	0.00392913	0.0853556	-1.99653	4.79965	5.14701
GLYAT	All Targets	RNA	Endogenous	1	1	39	12.5	7.47533	1	1	10249	FALSE	1.31678	4.80415	-0.564649	4.62341	-2.62707	0.0104445	0.126547	-2.80298	4.33188	5.0607
CRYBB1	All Targets	RNA	Endogenous	1	1	35	11	9.35316	1	1	1414	FALSE	0.46444	5.03952	-0.564565	4.88451	-2.61241	0.0111352	0.129576	-2.86828	4.76795	5.05936
SELE	All Targets	RNA	Endogenous	1	1	47	11.5	9.32715	1	1	6401	FALSE	0.558723	5.02929	-0.564314	4.88929	-2.90829	0.00473327	0.092627	-2.16835	4.83344	4.97306
SNCG	All Targets	RNA	Endogenous	1	1	43	13.5	8.93574	1	1	6623	FALSE	0.411133	4.98257	-0.564243	4.83286	-2.47469	0.0159806	0.151875	-3.14498	4.61869	5.15412
MFSD4A	All Targets	RNA	Endogenous	1	1	42	10	9.05362	1	1	148808	FALSE	0.238519	4.99596	-0.564041	4.85765	-3.06455	0.00299102	0.0764194	-1.75618	4.70028	5.09371
SERPINA11	All Targets	RNA	Endogenous	1	1	32	10	8.05145	1	1	256394	FALSE	-0.399254	4.85085	-0.564015	4.69822	-3.05564	0.00307149	0.0773791	-1.77515	4.56143	4.90342
PARP11	All Targets	RNA	Endogenous	1	1	34	10	8.53295	1	1	57097	FALSE	-0.018065	4.93008	-0.563897	4.77287	-2.90706	0.00474532	0.092627	-2.16105	4.68136	4.91014
TNNT1	All Targets	RNA	Endogenous	1	1	40	12.5	10.4854	1	1	7138	FALSE	0.86756	5.17926	-0.563507	5.04037	-2.79485	0.00664482	0.103052	-2.45518	4.87152	5.29364
SAXO2	All Targets	RNA	Endogenous	1	1	37	10.5	7.73959	1	1	283726	FALSE	0.319954	4.81295	-0.563329	4.64649	-2.7634	0.00712963	0.106992	-2.48422	4.53335	4.81621
MRTO4	All Targets	RNA	Endogenous	1	1	43	12	10.4319	1	1	51154	FALSE	-0.0925362	5.16237	-0.563203	5.04054	-3.113	0.00258703	0.0732488	-1.64987	4.8841	5.2752
ZNF717	All Targets	RNA	Endogenous	1	1	43	14	10.3542	1	1	100131827	FALSE	-0.149409	5.15471	-0.563125	5.02336	-3.17147	0.00216724	0.0679872	-1.49098	4.96805	5.10631
OR5J2	All Targets	RNA	Endogenous	1	1	28	10.5	8.20998	1	1	282775	FALSE	-0.313962	4.88186	-0.56301	4.72872	-3.14292	0.00236355	0.0706357	-1.55805	4.62723	4.88096
ANKRD22	All Targets	RNA	Endogenous	1	1	31	7	6.04222	1	1	118932	FALSE	0.337165	4.52458	-0.562918	4.31698	-2.67854	0.00901017	0.117558	-2.66173	4.14723	4.57162
TRIM58	All Targets	RNA	Endogenous	1	1	33	11.5	7.11599	1	1	25893	FALSE	0.172861	4.72853	-0.562913	4.54138	-2.74461	0.00751192	0.109199	-2.52762	4.44953	4.67917
CCR8	All Targets	RNA	Endogenous	1	1	42	13	9.07006	1	1	1237	FALSE	-0.400067	5.00903	-0.562414	4.86806	-3.20606	0.00194978	0.0654163	-1.39735	4.70256	5.11631
ZNF726	All Targets	RNA	Endogenous	1	1	28	10	7.86521	1	1	730087	FALSE	0.133735	4.83494	-0.56231	4.66564	-2.97195	0.00393105	0.0853556	-1.9942	4.59332	4.77413
ETNK2	All Targets	RNA	Endogenous	1	1	34	10.5	8.00659	1	1	55224	FALSE	-0.254031	4.84998	-0.562162	4.69218	-3.04362	0.00318314	0.0784354	-1.80678	4.5873	4.84948
VNN1	All Targets	RNA	Endogenous	1	1	261	12.5	10.5888	1	1	8876	FALSE	0.948894	5.18602	-0.561988	5.06266	-2.67979	0.00918346	0.118433	-2.71388	5.04559	5.08826
CHRNB3	All Targets	RNA	Endogenous	1	1	36	10	8.35078	1	1	1142	FALSE	-0.389271	4.89899	-0.561914	4.74167	-2.60851	0.0109637	0.1288	-2.84176	4.57841	4.98657
C2orf16	All Targets	RNA	Endogenous	1	1	34	11	7.92942	1	1	84226	FALSE	0.101844	4.86003	-0.561847	4.6921	-2.82062	0.00607209	0.0992631	-2.35646	4.5508	4.90406
CACNA2D2	All Targets	RNA	Endogenous	1	1	42	13	9.54493	1	1	9254	FALSE	-0.155653	5.06944	-0.561783	4.93546	-3.37622	0.00114701	0.0543322	-0.938898	4.81445	5.11697
PRAMEF12	All Targets	RNA	Endogenous	1	1	37	10.5	7.19156	1	1	390999	FALSE	-0.164693	4.72845	-0.56174	4.55151	-2.99266	0.00369973	0.0833576	-1.9345	4.4794	4.65969
SPATA5L1	All Targets	RNA	Endogenous	1	1	32	11.5	8.59072	1	1	79029	FALSE	0.380853	4.93335	-0.561364	4.77744	-2.80735	0.00630362	0.0999646	-2.39487	4.64384	4.97784
ITGA7	All Targets	RNA	Endogenous	1	1	33	9.5	8.16212	1	1	3679	FALSE	-0.094782	4.86085	-0.561344	4.69977	-3.09731	0.0027119	0.0739935	-1.67346	4.55687	4.91412
ARC	All Targets	RNA	Endogenous	1	1	60	12	9.05828	1	1	23237	FALSE	1.04197	5.00744	-0.561241	4.86144	-2.38686	0.0211538	0.17042	-3.40367	4.94821	4.73128
ZNF683	All Targets	RNA	Endogenous	1	1	32	10	6.67743	1	1	257101	FALSE	0.142874	4.67099	-0.561159	4.46501	-2.60313	0.0110487	0.129181	-2.8341	4.29604	4.71848
HOXD10	All Targets	RNA	Endogenous	1	1	41	9.5	7.7083	1	1	3236	FALSE	0.0350836	4.8101	-0.560761	4.64373	-2.82358	0.00602155	0.0992631	-2.32921	4.49249	4.8706
OR8H1	All Targets	RNA	Endogenous	1	1	37	9.5	8.17994	1	1	219469	FALSE	0.194608	4.87776	-0.560604	4.72387	-3.04317	0.00318734	0.0784354	-1.81108	4.64178	4.847
FAM117B	All Targets	RNA	Endogenous	1	1	49	12	10.0998	1	1	150864	FALSE	0.143845	5.13189	-0.560524	5.00021	-2.98588	0.00377398	0.0839545	-1.96876	4.90957	5.13618
ZNHIT2	All Targets	RNA	Endogenous	1	1	38	10.5	8.37997	1	1	741	FALSE	-0.434117	4.89985	-0.560134	4.75143	-2.86785	0.00531003	0.0963605	-2.23882	4.58767	4.99706
CCK	All Targets	RNA	Endogenous	1	1	33	12	8.87747	1	1	885	FALSE	0.374131	4.97743	-0.560049	4.83349	-3.03867	0.00323018	0.0790584	-1.83755	4.78104	4.91217
SLC22A10	All Targets	RNA	Endogenous	1	1	38	11.5	8.48412	1	1	387775	FALSE	-0.286141	4.91998	-0.559828	4.76975	-3.11929	0.00253849	0.0726815	-1.61605	4.59331	5.03441
ATM	All Targets	RNA	Endogenous	1	1	30	10	7.77883	1	1	472	FALSE	0.38833	4.81904	-0.559598	4.65232	-2.80155	0.00640734	0.100688	-2.39115	4.48849	4.89807
KIF1A	All Targets	RNA	Endogenous	1	1	34	12	7.89043	1	1	547	FALSE	-0.194983	4.83809	-0.559404	4.67717	-3.05496	0.00307766	0.0774265	-1.77404	4.51546	4.91974
SCGB3A2	All Targets	RNA	Endogenous	1	1	48	11	7.74891	1	1	117156	FALSE	0.0167549	4.8209	-0.559286	4.65603	-2.87394	0.0052184	0.0957917	-2.22688	4.54773	4.81847
MFAP1	All Targets	RNA	Endogenous	1	1	37	13	9.16871	1	1	4236	FALSE	0.74076	5.01167	-0.559259	4.8722	-2.82056	0.0060732	0.0992631	-2.36934	4.77522	5.01767
ALKAL1	All Targets	RNA	Endogenous	1	1	41	12	9.1261	1	1	389658	FALSE	0.552136	5.01917	-0.55887	4.87355	-2.91717	0.00460892	0.0917535	-2.13978	4.76149	5.04164
OR52E5	All Targets	RNA	Endogenous	1	1	32	10	7.24424	1	1	390082	FALSE	0.955203	4.74918	-0.558762	4.56682	-2.60451	0.0110504	0.129181	-2.84701	4.43574	4.76345
KRTAP16-1	All Targets	RNA	Endogenous	1	1	33	9	7.15648	1	1	100505753	FALSE	0.232915	4.74133	-0.558756	4.54934	-2.70109	0.0084707	0.114797	-2.61648	4.39424	4.78199
BLVRB	All Targets	RNA	Endogenous	1	1	84	19.5	13.6302	1	1	645	FALSE	0.470245	5.5175	-0.558603	5.42103	-3.18421	0.00208463	0.0667895	-1.4687	5.24306	5.68798
COL4A4	All Targets	RNA	Endogenous	1	1	32	11.5	8.92928	1	1	1286	FALSE	0.354831	4.98104	-0.558281	4.83054	-3.15811	0.00225711	0.0700233	-1.52959	4.72693	4.98595
SCN9A	All Targets	RNA	Endogenous	1	1	50	12	8.02121	1	1	6335	FALSE	0.453157	4.87593	-0.558182	4.70485	-2.79151	0.00659071	0.102486	-2.43394	4.64354	4.7968
ZNF30	All Targets	RNA	Endogenous	1	1	41	10	8.25262	1	1	90075	FALSE	0.0451291	4.87588	-0.558139	4.72075	-2.58803	0.0115951	0.130933	-2.88856	4.60188	4.89907
ZBTB32	All Targets	RNA	Endogenous	1	1	24	8	5.91196	1	1	27033	FALSE	0.269347	4.51254	-0.558068	4.29526	-2.71315	0.00819441	0.112919	-2.58508	4.16949	4.48391
NUTM1	All Targets	RNA	Endogenous	1	1	34	8	6.10644	1	1	256646	FALSE	-0.626238	4.52919	-0.558028	4.32936	-2.89795	0.00487135	0.0937775	-2.14918	4.22265	4.48941
SCGB1D2	All Targets	RNA	Endogenous	1	1	35	11	7.68029	1	1	10647	FALSE	-0.146904	4.81254	-0.557929	4.64208	-3.11472	0.00257368	0.0731086	-1.6292	4.59314	4.71548
OBI1	All Targets	RNA	Endogenous	1	1	37	9	6.94614	1	1	79596	FALSE	0.3695	4.68719	-0.557653	4.50468	-2.69815	0.00853935	0.11495	-2.62786	4.38325	4.68683
KBTBD3	All Targets	RNA	Endogenous	1	1	31	10	8.26959	1	1	143879	FALSE	0.15686	4.89015	-0.557647	4.72481	-3.01958	0.00341788	0.0805904	-1.86781	4.67987	4.7922
C11orf54	All Targets	RNA	Endogenous	1	1	54	11.5	9.34506	1	1	28970	FALSE	-0.100261	5.02648	-0.557536	4.89263	-3.08116	0.00284637	0.0754201	-1.71131	4.68781	5.19986
OR2AK2	All Targets	RNA	Endogenous	1	1	41	11.5	7.71592	1	1	391191	FALSE	0.643763	4.84433	-0.557431	4.66782	-2.68032	0.00901542	0.117558	-2.69133	4.5887	4.7865
ELAPOR1	All Targets	RNA	Endogenous	1	1	39	13	9.35103	1	1	57535	FALSE	-0.139184	5.03194	-0.556908	4.89407	-2.84574	0.0056552	0.0976173	-2.30772	4.79875	5.03704
CPLX3	All Targets	RNA	Endogenous	1	1	32	11	8.38671	1	1	594855	FALSE	0.0575245	4.91	-0.556884	4.75662	-3.06692	0.00297001	0.0762063	-1.75895	4.6392	4.93276
DEFB121	All Targets	RNA	Endogenous	1	1	32	11	7.83069	1	1	245934	FALSE	0.688678	4.85915	-0.556758	4.67377	-2.56842	0.0122777	0.134548	-2.93851	4.49924	4.93557
CCDC197	All Targets	RNA	Endogenous	1	1	36	12	9.4033	1	1	256369	FALSE	0.845157	5.04362	-0.556152	4.89662	-2.64898	0.00999152	0.123458	-2.78513	4.75886	5.10326
JAM3	All Targets	RNA	Endogenous	1	1	27	10	7.61801	1	1	83700	FALSE	0.715659	4.79612	-0.556039	4.62531	-2.67521	0.00909223	0.118114	-2.67809	4.45352	4.88301
HCRTR2	All Targets	RNA	Endogenous	1	1	36	9	7.50105	1	1	3062	FALSE	0.313921	4.78524	-0.555701	4.60642	-2.72795	0.00786661	0.111425	-2.56532	4.44844	4.8434
OTUB2	All Targets	RNA	Endogenous	1	1	33	11	8.69034	1	1	78990	FALSE	-0.70329	4.94041	-0.555681	4.78386	-3.00644	0.00355279	0.0821604	-1.90115	4.6737	4.94911
ZSCAN5A	All Targets	RNA	Endogenous	1	1	66	13	10.3201	1	1	79149	FALSE	0.18216	5.159	-0.555622	5.02836	-2.86543	0.00534681	0.0965422	-2.26627	4.88596	5.24198
PPP1R1C	All Targets	RNA	Endogenous	1	1	42	12.5	9.55531	1	1	151242	FALSE	0.322286	5.06348	-0.555498	4.92232	-2.70707	0.00836341	0.114461	-2.63306	4.79426	5.11443
PEX14	All Targets	RNA	Endogenous	1	1	52	12	8.16381	1	1	5195	FALSE	0.259015	4.89748	-0.555482	4.73797	-2.86978	0.00528252	0.0960545	-2.26243	4.79899	4.64645
MAGEA1	All Targets	RNA	Endogenous	1	1	33	9	7.70389	1	1	4100	FALSE	-0.322184	4.80384	-0.5554	4.63556	-2.84644	0.00564393	0.0976173	-2.28747	4.47407	4.8778
SLC35F1	All Targets	RNA	Endogenous	1	1	30	12	8.3948	1	1	222553	FALSE	-0.0375005	4.90656	-0.555381	4.7629	-3.18238	0.00209629	0.0669256	-1.45772	4.66796	4.90532
WDR5B	All Targets	RNA	Endogenous	1	1	45	14	9.95438	1	1	54554	FALSE	0.329699	5.10381	-0.555323	4.97378	-2.93378	0.00439275	0.0902362	-2.10003	4.88041	5.11385
MTHFD2L	All Targets	RNA	Endogenous	1	1	37	12	9.65339	1	1	441024	FALSE	-0.104881	5.08503	-0.555275	4.95373	-3.03485	0.0032669	0.0795243	-1.8429	4.75976	5.24469
PON1	All Targets	RNA	Endogenous	1	1	32	10	7.96519	1	1	5444	FALSE	0.206904	4.85275	-0.555048	4.68829	-2.90659	0.00475175	0.092627	-2.1491	4.53124	4.92386
BCL2A1	All Targets	RNA	Endogenous	1	1	30	9	7.40006	1	1	597	FALSE	0.175622	4.75478	-0.554939	4.58734	-2.81419	0.00618328	0.099931	-2.36802	4.48536	4.74033
CAVIN2	All Targets	RNA	Endogenous	1	1	24	4	3.84896	1	1	8436	FALSE	-0.550662	4.08212	-0.554867	3.73747	-2.51592	0.0139208	0.141866	-3.00057	3.65166	3.8662
PTF1A	All Targets	RNA	Endogenous	1	1	44	10.5	7.84828	1	1	256297	FALSE	0.471748	4.85025	-0.554765	4.67791	-2.86082	0.00541751	0.0970103	-2.26256	4.53188	4.89696
KLHDC1	All Targets	RNA	Endogenous	1	1	44	13	9.50132	1	1	122773	FALSE	-0.0348112	5.06394	-0.554631	4.92072	-2.86696	0.00532347	0.0964103	-2.26125	4.87375	4.99117
ANO1	All Targets	RNA	Endogenous	1	1	89	15.5	16.7887	1	1	55107	FALSE	1.59049	5.77942	-0.554554	5.68324	-2.34073	0.0245376	0.181027	-3.56233	5.50572	5.94951
PROM1	All Targets	RNA	Endogenous	1	1	130	15	12.5618	1	1	8842	FALSE	0.0877735	5.41873	-0.554455	5.31447	-3.31131	0.00140716	0.0575416	-1.12986	5.17222	5.52783
ZPLD1	All Targets	RNA	Endogenous	1	1	36	11	8.84683	1	1	131368	FALSE	0.209392	4.9736	-0.554427	4.8246	-2.82009	0.00608124	0.0992631	-2.3615	4.67853	5.0437
TIAM1	All Targets	RNA	Endogenous	1	1	31	11.5	8.1892	1	1	7074	FALSE	0.0772059	4.88281	-0.554419	4.72738	-3.13393	0.00242871	0.0710033	-1.58243	4.62231	4.88499
VPS33A	All Targets	RNA	Endogenous	1	1	32	9	8.0304	1	1	65082	FALSE	-0.218446	4.84145	-0.554156	4.67815	-2.78694	0.00667563	0.103183	-2.4252	4.50788	4.93355
TACC3	All Targets	RNA	Endogenous	1	1	42	12	9.58269	1	1	10460	FALSE	0.433561	5.07059	-0.553905	4.93693	-2.97727	0.0038703	0.0852865	-1.9899	4.8459	5.07348
SEMA5B	All Targets	RNA	Endogenous	1	1	28	8.5	6.52371	1	1	54437	FALSE	0.503417	4.62051	-0.55332	4.42176	-2.67604	0.00907171	0.117978	-2.67114	4.22994	4.7095
PCDH9	All Targets	RNA	Endogenous	1	1	38	10.5	7.39911	1	1	5101	FALSE	0.118805	4.75923	-0.553316	4.58163	-2.73643	0.0076842	0.110444	-2.54116	4.41863	4.82614
CD1A	All Targets	RNA	Endogenous	1	1	56	15	10.9195	1	1	909	FALSE	-0.433993	5.23489	-0.553067	5.11432	-3.3598	0.00120816	0.0544822	-0.988739	4.99664	5.29082
EXTL1	All Targets	RNA	Endogenous	1	1	33	10	7.6018	1	1	2134	FALSE	-0.204914	4.79493	-0.553044	4.63295	-2.97479	0.00389846	0.0852865	-1.97184	4.42324	4.94751
TCF4	All Targets	RNA	Endogenous	1	1	47	14	10.9371	1	1	6925	FALSE	0.344604	5.23141	-0.553014	5.10918	-2.94987	0.00419228	0.0881898	-2.06547	5.0315	5.2257
KRTAP7-1	All Targets	RNA	Endogenous	1	1	39	9.5	5.98304	1	1	337878	FALSE	1.09556	4.54309	-0.552882	4.33045	-2.66406	0.00937263	0.119059	-2.70679	4.20117	4.52437
KEL	All Targets	RNA	Endogenous	1	1	23	9	6.55246	1	1	3792	FALSE	0.226155	4.61077	-0.5528	4.41802	-2.75433	0.00731187	0.108108	-2.49953	4.32017	4.56478
BLID	All Targets	RNA	Endogenous	1	1	37	11	7.60849	1	1	414899	FALSE	0.214134	4.79883	-0.552733	4.63329	-2.82279	0.00603498	0.0992631	-2.34353	4.477	4.86773
NLGN3	All Targets	RNA	Endogenous	1	1	35	11	8.40573	1	1	54413	FALSE	-0.381187	4.90548	-0.55241	4.74837	-2.88852	0.00500499	0.0944351	-2.19392	4.63587	4.91713
RAB31	All Targets	RNA	Endogenous	1	1	40	13	10.5493	1	1	11031	FALSE	0.807918	5.18557	-0.552318	5.0539	-2.75074	0.00741387	0.108706	-2.54092	4.93083	5.23849
PRRX1	All Targets	RNA	Endogenous	1	1	43	11	8.48807	1	1	5396	FALSE	0.697879	4.91841	-0.55164	4.76751	-2.52984	0.01354	0.139927	-3.01409	4.57701	5.05325
LTBP2	All Targets	RNA	Endogenous	1	1	39	11	8.69954	1	1	4053	FALSE	0.166245	4.94577	-0.551452	4.78662	-2.81407	0.00618554	0.099931	-2.38151	4.70096	4.9151
NTSR2	All Targets	RNA	Endogenous	1	1	38	9.5	7.85623	1	1	23620	FALSE	-0.0106472	4.82483	-0.551387	4.66809	-3.16993	0.00217743	0.0680703	-1.49123	4.62395	4.7343
ZDHHC22	All Targets	RNA	Endogenous	1	1	42	12.5	9.97869	1	1	283576	FALSE	-0.0169777	5.11441	-0.551127	4.97274	-2.99248	0.0037016	0.0833576	-1.9598	4.88678	5.10168
PDPR	All Targets	RNA	Endogenous	1	1	51	10.5	9.32133	1	1	55066	FALSE	0.729777	5.03152	-0.551066	4.89025	-3.03562	0.00325952	0.0794529	-1.84385	4.88975	4.89099
OR51B6	All Targets	RNA	Endogenous	1	1	39	12.5	9.19318	1	1	390058	FALSE	0.804633	5.0313	-0.550844	4.88935	-2.77949	0.00681628	0.104537	-2.46678	4.74965	5.09891
OR4D11	All Targets	RNA	Endogenous	1	1	37	11.5	8.06188	1	1	219986	FALSE	-0.537017	4.86904	-0.550717	4.70436	-2.91765	0.00460262	0.0917371	-2.11544	4.55655	4.92607
LY86	All Targets	RNA	Endogenous	1	1	39	11.5	7.42879	1	1	9450	FALSE	0.113945	4.76833	-0.550717	4.60247	-2.88568	0.00504596	0.0947216	-2.19026	4.43961	4.84675
REELD1	All Targets	RNA	Endogenous	1	1	42	11	8.11522	1	1	345051	FALSE	0.787731	4.88983	-0.550361	4.72598	-2.73834	0.00764361	0.1103	-2.55372	4.5972	4.91915
MATN2	All Targets	RNA	Endogenous	1	1	53	12	8.41591	1	1	4147	FALSE	0.863184	4.92529	-0.550308	4.7735	-2.6163	0.0107342	0.127888	-2.83422	4.61703	5.00821
DNAJB5	All Targets	RNA	Endogenous	1	1	31	9	8.17842	1	1	25822	FALSE	0.655741	4.87395	-0.550265	4.70707	-2.63672	0.0101013	0.124289	-2.77818	4.54168	4.95514
SULF1	All Targets	RNA	Endogenous	1	1	46	16	13.8711	1	1	23213	FALSE	0.664954	5.52447	-0.549887	5.42466	-2.74013	0.00777569	0.110876	-2.59303	5.2473	5.69071
OR8U9	All Targets	RNA	Endogenous	1	1	38	8.5	7.20365	1	1	504190	FALSE	0.824249	4.73326	-0.549807	4.55067	-2.71558	0.0081398	0.112668	-2.60608	4.46177	4.68401
FOXE1	All Targets	RNA	Endogenous	1	1	37	11.5	8.61803	1	1	2304	FALSE	-0.668848	4.93053	-0.549769	4.78274	-3.07782	0.00287488	0.0754834	-1.72586	4.67195	4.94892
DLGAP5	All Targets	RNA	Endogenous	1	1	31	11.5	8.12378	1	1	9787	FALSE	0.487541	4.87652	-0.549692	4.71758	-2.72983	0.00782572	0.111229	-2.5604	4.50705	5.03337
MARS2	All Targets	RNA	Endogenous	1	1	39	7	6.4107	1	1	92935	FALSE	0.494755	4.62963	-0.549692	4.39747	-2.30044	0.0248636	0.18261	-3.48871	4.34272	4.4796
ZMAT4	All Targets	RNA	Endogenous	1	1	39	13.5	9.42087	1	1	79698	FALSE	0.0803147	5.05315	-0.549033	4.91901	-3.21142	0.00191796	0.0652388	-1.39109	4.82634	5.05802
CLVS2	All Targets	RNA	Endogenous	1	1	29	9	7.07594	1	1	134829	FALSE	-0.0869352	4.71326	-0.548992	4.52749	-2.7137	0.00818191	0.112833	-2.59621	4.42124	4.68687
PLN	All Targets	RNA	Endogenous	1	1	28	10.5	8.49535	1	1	5350	FALSE	0.259079	4.92055	-0.548681	4.7633	-2.82229	0.00604357	0.0992631	-2.36167	4.7029	4.85391
TGM3	All Targets	RNA	Endogenous	1	1	36	11.5	8.5965	1	1	7053	FALSE	0.096345	4.94014	-0.548663	4.7915	-2.89424	0.00492358	0.0938028	-2.18813	4.6929	4.9394
ZNF205	All Targets	RNA	Endogenous	1	1	27	10.5	7.04111	1	1	7755	FALSE	-0.269062	4.69629	-0.548341	4.52276	-2.96463	0.00401591	0.0866459	-1.99812	4.38633	4.72742
GPR12	All Targets	RNA	Endogenous	1	1	45	11	7.84974	1	1	2835	FALSE	0.0782033	4.85047	-0.548306	4.68265	-2.78832	0.00664997	0.103052	-2.42338	4.50179	4.95395
HES3	All Targets	RNA	Endogenous	1	1	42	8.5	7.00132	1	1	390992	FALSE	0.348309	4.72388	-0.548225	4.52653	-2.88151	0.00510658	0.0947216	-2.19999	4.43351	4.66607
OSGEPL1	All Targets	RNA	Endogenous	1	1	43	10.5	8.20493	1	1	64172	FALSE	-0.238362	4.8782	-0.548103	4.72247	-2.88811	0.00501097	0.0944491	-2.19005	4.57047	4.95047
OR5I1	All Targets	RNA	Endogenous	1	1	58	15.5	10.7158	1	1	10798	FALSE	-0.0650605	5.22584	-0.547977	5.09937	-3.26029	0.00164956	0.0611669	-1.26615	5.04166	5.18595
KIAA2012	All Targets	RNA	Endogenous	1	1	35	9.5	6.84122	1	1	100652824	FALSE	0.665209	4.6685	-0.547811	4.48019	-2.55684	0.0125773	0.136095	-2.95789	4.3715	4.64322
CCDC174	All Targets	RNA	Endogenous	1	1	48	11	9.17899	1	1	51244	FALSE	-0.0484175	5.01576	-0.547774	4.87474	-2.83048	0.00590514	0.0989935	-2.33385	4.71793	5.10996
CTSK	All Targets	RNA	Endogenous	1	1	49	16.5	12.0092	1	1	1513	FALSE	0.646566	5.33742	-0.547219	5.22573	-2.71466	0.00847005	0.114797	-2.6713	5.1463	5.34487
FOXB2	All Targets	RNA	Endogenous	1	1	67	11	8.33662	1	1	442425	FALSE	0.419995	4.9058	-0.54721	4.74984	-2.80268	0.00638717	0.100622	-2.40994	4.77321	4.7148
PCP2	All Targets	RNA	Endogenous	1	1	40	15.5	10.6254	1	1	126006	FALSE	0.433147	5.18369	-0.546818	5.0554	-2.83988	0.00575	0.0981253	-2.33046	4.97707	5.1729
OR5M3	All Targets	RNA	Endogenous	1	1	40	12	8.29492	1	1	219482	FALSE	-0.269007	4.90287	-0.546753	4.75048	-3.12421	0.00250109	0.0719622	-1.6097	4.68742	4.84509
ATP6V1D	All Targets	RNA	Endogenous	1	1	40	13	11.4602	1	1	51382	FALSE	0.302591	5.27676	-0.546318	5.14965	-2.84963	0.00559291	0.0976173	-2.30789	5.01545	5.35095
ABCB11	All Targets	RNA	Endogenous	1	1	40	12	8.0568	1	1	8647	FALSE	-0.311736	4.87803	-0.546265	4.71719	-2.97579	0.00388708	0.0852865	-1.98705	4.6365	4.83823
POGLUT2	All Targets	RNA	Endogenous	1	1	29	8.5	6.4603	1	1	79070	FALSE	-0.37739	4.59992	-0.546018	4.41066	-2.7341	0.00773386	0.110572	-2.53405	4.27611	4.61248
IL5	All Targets	RNA	Endogenous	1	1	31	9	7.00051	1	1	3567	FALSE	0.0830301	4.69534	-0.545991	4.5132	-2.73372	0.00774212	0.110572	-2.54711	4.375	4.72052
HS3ST3B1	All Targets	RNA	Endogenous	1	1	55	10.5	7.45169	1	1	9953	FALSE	-0.0187064	4.78522	-0.545971	4.60868	-2.82936	0.00592388	0.0991548	-2.33184	4.51108	4.75508
BOD1L2	All Targets	RNA	Endogenous	1	1	32	8	6.69854	1	1	284257	FALSE	-0.181166	4.65358	-0.545755	4.45578	-2.60808	0.0109031	0.1288	-2.81553	4.2852	4.71165
CIART	All Targets	RNA	Endogenous	1	1	63	14	10.3507	1	1	148523	FALSE	-0.0560561	5.16778	-0.545723	5.04207	-3.06012	0.00303077	0.0769537	-1.79527	5.02112	5.0735
MDM1	All Targets	RNA	Endogenous	1	1	37	12.5	8.9947	1	1	56890	FALSE	-0.229696	4.99001	-0.545564	4.84575	-2.88548	0.00504882	0.0947216	-2.19583	4.71059	5.04847
IL20RB	All Targets	RNA	Endogenous	1	1	24	8	5.78646	1	1	53833	FALSE	0.615302	4.48822	-0.545476	4.27569	-2.63579	0.0101192	0.124339	-2.76239	4.05674	4.6041
SPATA7	All Targets	RNA	Endogenous	1	1	41	10	7.79179	1	1	55812	FALSE	-0.675148	4.81667	-0.545366	4.6491	-2.74596	0.00748383	0.109199	-2.51618	4.47019	4.91746
MSN	All Targets	RNA	Endogenous	1	5	259	23.5	23.3504	1	1	4478	FALSE	1.87927	6.20641	-0.545322	6.1361	-3.01444	0.00349194	0.0812627	-1.94229	6.02399	6.30426
SPANXN3	All Targets	RNA	Endogenous	1	1	63	11	7.61903	1	1	139067	FALSE	1.16642	4.82332	-0.545286	4.64911	-2.53771	0.0131922	0.138349	-2.99291	4.48484	4.89551
SMR3B	All Targets	RNA	Endogenous	1	1	38	10	7.7156	1	1	10879	FALSE	0.0917766	4.80404	-0.545255	4.63813	-2.66303	0.00939895	0.119309	-2.707	4.46304	4.90077
SLC22A2	All Targets	RNA	Endogenous	1	1	34	10.5	8.06909	1	1	6582	FALSE	0.370321	4.86205	-0.54514	4.70698	-3.03379	0.00327721	0.0795617	-1.8413	4.59458	4.87557
ATP9B	All Targets	RNA	Endogenous	1	1	36	10	8.35917	1	1	374868	FALSE	0.184922	4.8965	-0.545084	4.74242	-2.86903	0.00529219	0.0961335	-2.25586	4.69807	4.80894
ZDHHC19	All Targets	RNA	Endogenous	1	1	33	11	7.19267	1	1	131540	FALSE	0.395291	4.72888	-0.544899	4.55637	-2.81453	0.00617741	0.099931	-2.3661	4.47444	4.67927
NYX	All Targets	RNA	Endogenous	1	1	41	12	8.97338	1	1	60506	FALSE	-0.280064	4.98882	-0.544781	4.84017	-2.97711	0.00387209	0.0852865	-1.98338	4.70276	5.04627
HDGFL3	All Targets	RNA	Endogenous	1	1	43	16	11.4469	1	1	50810	FALSE	0.319358	5.28291	-0.544766	5.15554	-2.80663	0.00631652	0.100033	-2.41121	5.02779	5.34717
KRTAP13-4	All Targets	RNA	Endogenous	1	1	32	9	6.7447	1	1	284827	FALSE	-0.118494	4.65108	-0.544509	4.46579	-2.90086	0.00483069	0.0934936	-2.15393	4.37739	4.59839
C11orf45	All Targets	RNA	Endogenous	1	1	37	9.5	7.24779	1	1	219833	FALSE	-0.143736	4.74756	-0.544212	4.56767	-2.6653	0.00934109	0.118953	-2.70538	4.38738	4.83811
EGR2	All Targets	RNA	Endogenous	1	1	38	12.5	9.44311	1	1	1959	FALSE	-0.0536636	5.03971	-0.544009	4.8947	-3.05171	0.00310757	0.0777453	-1.7955	4.83242	4.98812
HOXD8	All Targets	RNA	Endogenous	1	1	47	11	8.21677	1	1	3234	FALSE	0.354557	4.90469	-0.543757	4.73423	-2.47693	0.0155156	0.149305	-3.12165	4.60984	4.92083
NSDHL	All Targets	RNA	Endogenous	1	1	43	17	13.2759	1	1	50814	FALSE	-0.259298	5.46375	-0.543521	5.3606	-3.15779	0.00225932	0.0700233	-1.54579	5.2546	5.5196
ELOVL7	All Targets	RNA	Endogenous	1	1	48	12	8.38126	1	1	79993	FALSE	0.647954	4.91342	-0.543435	4.76827	-2.84401	0.00568296	0.097771	-2.30834	4.62711	4.98001
GPX7	All Targets	RNA	Endogenous	1	1	31	10	7.48697	1	1	2882	FALSE	-0.290551	4.78098	-0.543185	4.60504	-2.85129	0.00556657	0.0974853	-2.2747	4.45766	4.82612
ICAM2	All Targets	RNA	Endogenous	1	1	49	15	11.2122	1	1	3384	FALSE	0.0496809	5.27194	-0.54318	5.14967	-2.95729	0.00410277	0.0871825	-2.0504	5.04907	5.30057
SPEM1	All Targets	RNA	Endogenous	1	1	39	11.5	7.27064	1	1	374768	FALSE	0.624139	4.75529	-0.543118	4.58311	-2.56012	0.0124663	0.135543	-2.95485	4.50533	4.69979
FCER2	All Targets	RNA	Endogenous	1	1	38	12.5	8.84463	1	1	2208	FALSE	-0.303641	4.98047	-0.542943	4.83369	-3.02855	0.00332841	0.0801574	-1.85983	4.73488	4.98192
DNAAF1	All Targets	RNA	Endogenous	1	1	37	13	8.93439	1	1	123872	FALSE	0.882849	4.98847	-0.542573	4.84063	-2.88518	0.00505321	0.0947216	-2.2187	4.75175	4.97395
KMT5C	All Targets	RNA	Endogenous	1	1	55	9	9.60866	1	1	84787	FALSE	-0.207214	5.07077	-0.542316	4.92434	-2.71725	0.00810235	0.112668	-2.61016	4.89381	4.97014
SLC35E4	All Targets	RNA	Endogenous	1	1	82	13.5	13.117	1	1	339665	FALSE	0.613555	5.45777	-0.542042	5.34822	-2.87343	0.00523121	0.0957917	-2.26589	5.22397	5.53461
DNAJC5B	All Targets	RNA	Endogenous	1	1	35	9.5	7.25041	1	1	85479	FALSE	-0.137029	4.72654	-0.541996	4.56125	-3.01406	0.00347393	0.0811695	-1.877	4.4574	4.71701
RORB	All Targets	RNA	Endogenous	1	1	28	8.5	6.63806	1	1	6096	FALSE	-0.253639	4.64289	-0.541347	4.44997	-2.74976	0.00740538	0.108706	-2.50205	4.31246	4.65623
C8B	All Targets	RNA	Endogenous	1	1	33	10.5	8.02322	1	1	732	FALSE	-0.19105	4.84652	-0.54125	4.68597	-3.13999	0.00238462	0.0707869	-1.57377	4.65988	4.72511
REEP4	All Targets	RNA	Endogenous	1	1	50	14	11.7925	1	1	80346	FALSE	0.551435	5.31632	-0.541107	5.20094	-2.80963	0.0062663	0.099931	-2.41039	5.02618	5.46308
ARHGEF9	All Targets	RNA	Endogenous	1	1	36	9.5	8.43986	1	1	23229	FALSE	0.119938	4.90973	-0.54088	4.76233	-2.9119	0.00467953	0.0922555	-2.13006	4.58403	5.02979
EBF3	All Targets	RNA	Endogenous	1	1	31	9	7.01799	1	1	253738	FALSE	0.696152	4.70991	-0.540725	4.52428	-2.56765	0.0121536	0.13397	-2.92758	4.42118	4.67894
TMEM91	All Targets	RNA	Endogenous	1	1	35	10.5	8.00806	1	1	641649	FALSE	0.272409	4.85376	-0.539686	4.69651	-2.77863	0.00683272	0.104537	-2.45657	4.54892	4.9179
SIRPD	All Targets	RNA	Endogenous	1	1	40	13.5	8.6975	1	1	128646	FALSE	0.728682	4.9663	-0.539643	4.80994	-2.72145	0.00800906	0.112328	-2.58392	4.64496	5.0574
MED7	All Targets	RNA	Endogenous	1	1	44	15	10.6797	1	1	9443	FALSE	-0.76627	5.19436	-0.539472	5.07225	-3.10936	0.00261553	0.0736021	-1.66267	5.0033	5.17568
GLI2	All Targets	RNA	Endogenous	1	1	33	12	8.19926	1	1	2736	FALSE	0.504885	4.89435	-0.539255	4.73036	-2.68387	0.00887975	0.117158	-2.66614	4.57083	4.96965
SFTPC	All Targets	RNA	Endogenous	1	1	28	9	7.26341	1	1	6440	FALSE	0.291686	4.73635	-0.538915	4.55027	-2.42947	0.0174146	0.157542	-3.19681	4.3909	4.78933
CCN4	All Targets	RNA	Endogenous	1	1	32	9	7.48617	1	1	8840	FALSE	0.170349	4.77839	-0.538869	4.59879	-2.77367	0.00692822	0.105372	-2.46772	4.51663	4.72203
TRIM3	All Targets	RNA	Endogenous	1	1	45	9.5	7.94724	1	1	10612	FALSE	0.235444	4.84983	-0.538859	4.68326	-2.58642	0.0115537	0.130933	-2.88274	4.57771	4.84158
ACO1	All Targets	RNA	Endogenous	1	1	49	13	10.5624	1	1	48	FALSE	0.295664	5.17911	-0.538756	5.04444	-2.92847	0.0044608	0.0904089	-2.09196	4.85783	5.32435
KCNJ16	All Targets	RNA	Endogenous	1	1	39	9	7.25667	1	1	3773	FALSE	-0.0465117	4.7465	-0.538382	4.5642	-2.88422	0.00506708	0.0947216	-2.2066	4.49074	4.67439
MAB21L2	All Targets	RNA	Endogenous	1	1	27	6	5.52881	1	1	10586	FALSE	0.102498	4.43211	-0.53809	4.2023	-2.69864	0.00852784	0.11495	-2.61817	4.17184	4.24798
ERICH3	All Targets	RNA	Endogenous	1	1	46	8.5	7.206	1	1	127254	FALSE	0.212462	4.74174	-0.538056	4.56519	-2.63596	0.0101147	0.124339	-2.77619	4.43261	4.76405
STARD3NL	All Targets	RNA	Endogenous	1	2	45	16.5	13.3748	1	1	83930	FALSE	-0.942782	5.46483	-0.537671	5.35834	-3.29207	0.00149436	0.0581616	-1.1842	5.27442	5.48421
RSPO3	All Targets	RNA	Endogenous	1	1	35	8.5	6.96039	1	1	84870	FALSE	0.203839	4.7207	-0.537543	4.51773	-2.69467	0.00862108	0.115533	-2.63723	4.3908	4.70813
CENPM	All Targets	RNA	Endogenous	1	1	33	11.5	8.23188	1	1	79019	FALSE	-0.162173	4.88786	-0.537451	4.7308	-3.0241	0.00337253	0.080344	-1.86088	4.58519	4.94922
C17orf64	All Targets	RNA	Endogenous	1	1	35	8	5.80258	1	1	124773	FALSE	0.244823	4.53128	-0.53718	4.28184	-2.26259	0.0266218	0.188149	-3.52465	4.18449	4.42786
FZD4	All Targets	RNA	Endogenous	1	1	36	12	8.96419	1	1	8322	FALSE	-0.250919	4.99742	-0.537106	4.85394	-2.85886	0.00544791	0.0970639	-2.27719	4.73817	5.02758
ZSCAN31	All Targets	RNA	Endogenous	1	1	49	11.5	8.63451	1	1	64288	FALSE	-0.323302	4.95456	-0.537072	4.80093	-3.01248	0.00349019	0.0812627	-1.89284	4.65278	5.02315
MARCHF1	All Targets	RNA	Endogenous	1	1	28	10.5	7.18656	1	1	55016	FALSE	0.832832	4.73923	-0.537038	4.55827	-2.52947	0.013467	0.139768	-3.0121	4.39303	4.80611
ATG13	All Targets	RNA	Endogenous	1	1	115	19.5	15.2199	1	1	9776	FALSE	-0.871993	5.66174	-0.536852	5.57231	-3.34077	0.00128289	0.0561668	-1.06037	5.5167	5.65572
CDC42EP3	All Targets	RNA	Endogenous	1	2	34	11.5	11.4214	1	1	10602	FALSE	-0.256334	5.26447	-0.536295	5.13944	-2.94371	0.00426809	0.0886201	-2.0817	5.02185	5.31583
MYH3	All Targets	RNA	Endogenous	1	1	33	12	8.84935	1	1	4621	FALSE	0.292354	4.96675	-0.536236	4.81562	-2.703	0.00842637	0.114797	-2.63269	4.71269	4.97003
FNDC7	All Targets	RNA	Endogenous	1	1	39	11.5	8.32633	1	1	163479	FALSE	-0.294356	4.90136	-0.536154	4.752	-3.06177	0.00301591	0.0768374	-1.7644	4.64689	4.90965
JRK	All Targets	RNA	Endogenous	1	1	54	12.5	9.71128	1	1	8629	FALSE	-0.617133	5.07984	-0.53614	4.94379	-2.8839	0.00507181	0.0947216	-2.20798	4.79634	5.16497
SPRR3	All Targets	RNA	Endogenous	1	1	62	13	10.0047	1	1	6707	FALSE	1.19154	5.14066	-0.536046	5.00468	-2.52039	0.0140977	0.143132	-3.07064	4.81505	5.28913
TRPA1	All Targets	RNA	Endogenous	1	1	31	10.5	7.20574	1	1	8989	FALSE	0.279593	4.74602	-0.536022	4.57081	-2.75212	0.00735702	0.108243	-2.51158	4.45071	4.75096
IVL	All Targets	RNA	Endogenous	1	1	29	8.5	7.14815	1	1	3713	FALSE	0.679986	4.72427	-0.535841	4.5339	-2.46308	0.0162638	0.152795	-3.17411	4.52542	4.54662
KIAA0825	All Targets	RNA	Endogenous	1	1	60	11.5	8.6133	1	1	285600	FALSE	-0.763547	4.96661	-0.535752	4.80706	-2.89204	0.00495474	0.0938028	-2.17455	4.6215	5.0854
PLAAT1	All Targets	RNA	Endogenous	1	1	31	9.5	6.95285	1	1	57110	FALSE	1.0507	4.71031	-0.535641	4.52331	-2.38192	0.0200595	0.167051	-3.33342	4.39089	4.72192
ENDOV	All Targets	RNA	Endogenous	1	1	49	10	8.87249	1	1	284131	FALSE	0.579415	4.9773	-0.535641	4.82613	-2.58659	0.0115679	0.130933	-2.89675	4.6911	5.02867
PNLDC1	All Targets	RNA	Endogenous	1	1	40	12.5	8.61461	1	1	154197	FALSE	0.0799049	4.94022	-0.535618	4.79188	-2.89279	0.00494413	0.0938028	-2.19183	4.67536	4.96667
ARL13B	All Targets	RNA	Endogenous	1	1	59	14.5	10.4227	1	1	200894	FALSE	-0.0184574	5.17889	-0.535541	5.04964	-2.87742	0.0051667	0.0952302	-2.23493	4.91941	5.24499
ANGPTL3	All Targets	RNA	Endogenous	1	1	38	9	6.81357	1	1	27329	FALSE	0.0566781	4.67094	-0.535309	4.48145	-2.65331	0.00965043	0.120885	-2.72216	4.30426	4.74724
TRIB3	All Targets	RNA	Endogenous	1	1	29	9	7.15349	1	1	57761	FALSE	0.103531	4.72349	-0.534766	4.54128	-2.72795	0.00786652	0.111425	-2.558	4.40999	4.73821
SEMA3F	All Targets	RNA	Endogenous	1	1	44	10	7.91176	1	1	6405	FALSE	0.0991697	4.84555	-0.53451	4.68367	-2.93229	0.00441179	0.0902362	-2.09148	4.55022	4.88384
CYP2C8	All Targets	RNA	Endogenous	1	1	29	12.5	8.31845	1	1	1558	FALSE	0.62859	4.90851	-0.534438	4.74748	-2.72136	0.00801106	0.112328	-2.60119	4.63822	4.91138
FABP4	All Targets	RNA	Endogenous	1	1	32	9.5	7.75866	1	1	2167	FALSE	0.484457	4.82407	-0.534147	4.6579	-2.77957	0.00681492	0.104537	-2.45851	4.54509	4.82711
HSPA2	All Targets	RNA	Endogenous	1	1	46	13	10.1704	1	1	3306	FALSE	-0.284256	5.13975	-0.534127	5.00924	-3.08677	0.00279898	0.0748726	-1.71078	4.86392	5.22723
LEFTY1	All Targets	RNA	Endogenous	1	1	215	11.5	8.96347	1	1	10637	FALSE	-0.0845509	5.00162	-0.533992	4.85674	-2.6916	0.00869384	0.116223	-2.65104	4.75512	5.00918
CACNA1G	All Targets	RNA	Endogenous	1	1	34	9.5	7.09348	1	1	8913	FALSE	0.206697	4.72699	-0.533988	4.54497	-2.84837	0.00561297	0.0976173	-2.28533	4.46513	4.66474
PLXNC1	All Targets	RNA	Endogenous	1	1	28	10	8.56845	1	1	10154	FALSE	-0.240471	4.91943	-0.533628	4.76075	-2.68587	0.00883141	0.117043	-2.66967	4.68007	4.88176
DCAF4	All Targets	RNA	Endogenous	1	1	62	16.5	12.3352	1	1	26094	FALSE	-0.356615	5.38241	-0.533609	5.26853	-2.95365	0.00414649	0.0875565	-2.06903	5.14168	5.45879
KRT36	All Targets	RNA	Endogenous	1	1	26	9.5	6.73759	1	1	8689	FALSE	0.642247	4.65091	-0.533437	4.45987	-2.44146	0.0169973	0.156188	-3.19807	4.36076	4.60853
TMEM186	All Targets	RNA	Endogenous	1	1	40	13.5	10.2061	1	1	25880	FALSE	-0.962572	5.13836	-0.533371	5.01128	-3.02106	0.00340289	0.0805571	-1.8757	4.91035	5.16268
ZNF729	All Targets	RNA	Endogenous	1	1	36	9	8.60313	1	1	100287226	FALSE	0.131403	4.92769	-0.533338	4.77427	-2.55542	0.012621	0.136321	-2.97282	4.67346	4.92549
LRRD1	All Targets	RNA	Endogenous	1	1	32	7	6.99265	1	1	401387	FALSE	0.103595	4.6923	-0.533321	4.51397	-2.73587	0.00769618	0.110465	-2.54549	4.3544	4.75334
AUTS2	All Targets	RNA	Endogenous	1	1	25	9	5.94412	1	1	26053	FALSE	0.765779	4.51672	-0.533252	4.30955	-2.43557	0.0171816	0.157102	-3.19891	4.16918	4.5201
RAX	All Targets	RNA	Endogenous	1	1	29	10.5	6.87285	1	1	30062	FALSE	0.840221	4.68123	-0.533119	4.49884	-2.87885	0.0051457	0.0951066	-2.21688	4.39609	4.65297
DEFB132	All Targets	RNA	Endogenous	1	1	32	12	9.09929	1	1	400830	FALSE	0.202181	5.00325	-0.532984	4.86173	-2.81836	0.0061111	0.0994874	-2.3689	4.67409	5.14317
EIF2D	All Targets	RNA	Endogenous	1	1	44	11.5	9.0259	1	1	1939	FALSE	0.553545	4.98751	-0.532976	4.8422	-2.59144	0.0114361	0.13023	-2.89284	4.68162	5.08308
SUPT3H	All Targets	RNA	Endogenous	1	1	30	8.5	6.62214	1	1	8464	FALSE	0.620954	4.65328	-0.532926	4.44337	-2.61682	0.01065	0.127384	-2.81748	4.35368	4.5779
NPSR1	All Targets	RNA	Endogenous	1	1	41	12	8.29066	1	1	387129	FALSE	0.44629	4.90254	-0.532901	4.74798	-2.80913	0.00627221	0.099931	-2.38823	4.64334	4.90495
PKD1L3	All Targets	RNA	Endogenous	1	1	27	9	7.66273	1	1	342372	FALSE	0.454561	4.80218	-0.532856	4.63518	-2.60903	0.0108752	0.1288	-2.84591	4.51168	4.82043
ARL3	All Targets	RNA	Endogenous	1	1	31	9.5	7.29575	1	1	403	FALSE	-0.498251	4.75783	-0.532589	4.57638	-2.89442	0.00492096	0.0938028	-2.17546	4.52353	4.65566
GSTM2	All Targets	RNA	Endogenous	1	1	50	9.5	8.29892	1	1	2946	FALSE	-0.206636	4.89607	-0.532578	4.74173	-3.05185	0.0031063	0.0777453	-1.7918	4.66474	4.85722
GH1	All Targets	RNA	Endogenous	1	1	40	11	8.11175	1	1	2688	FALSE	-0.122571	4.87568	-0.532573	4.71295	-2.75894	0.00721858	0.107582	-2.49291	4.56416	4.93612
HLA-DQB1	All Targets	RNA	Endogenous	1	1	76	13	13.5743	1	1	3119	FALSE	0.218364	5.49197	-0.532514	5.38338	-3.00153	0.00360451	0.0825005	-1.92804	5.29101	5.52194
SHISA7	All Targets	RNA	Endogenous	1	1	52	11.5	7.54551	1	1	729956	FALSE	0.475568	4.79104	-0.532314	4.62575	-2.80432	0.00635768	0.10042	-2.3954	4.58528	4.68647
NADK2	All Targets	RNA	Endogenous	1	1	61	14.5	10.6864	1	1	133686	FALSE	0.0768517	5.19573	-0.532273	5.07213	-3.00573	0.00356021	0.0822268	-1.93557	5.0655	5.08208
ZNF831	All Targets	RNA	Endogenous	1	1	38	13	9.77237	1	1	128611	FALSE	-0.000980117	5.08879	-0.532257	4.95867	-3.11793	0.00254889	0.0727482	-1.63567	4.84996	5.12172
CPS1	All Targets	RNA	Endogenous	1	1	59	12	9.56787	1	1	1373	FALSE	0.206063	5.08236	-0.532206	4.94212	-2.81096	0.00623989	0.099931	-2.37775	4.79814	5.1581
ANKRD33	All Targets	RNA	Endogenous	1	1	39	12	8.03547	1	1	341405	FALSE	0.404484	4.86448	-0.532165	4.71048	-2.76479	0.00710207	0.106845	-2.48478	4.58808	4.89407
KCNK12	All Targets	RNA	Endogenous	1	1	30	11.5	8.41102	1	1	56660	FALSE	0.16604	4.90975	-0.532129	4.76051	-2.83841	0.00577393	0.0982548	-2.31223	4.55489	5.06895
FOLR3	All Targets	RNA	Endogenous	1	1	33	10.5	7.62195	1	1	2352	FALSE	0.39024	4.80633	-0.531573	4.6449	-2.56703	0.0121656	0.13397	-2.93111	4.50186	4.85945
CNDP2	All Targets	RNA	Endogenous	1	1	64	12	9.75946	1	1	55748	FALSE	0.487953	5.09742	-0.53157	4.95849	-2.88261	0.00509049	0.0947216	-2.20751	4.76951	5.24197
OTOA	All Targets	RNA	Endogenous	1	1	28	10	6.66518	1	1	146183	FALSE	0.516506	4.64768	-0.531485	4.45822	-2.56586	0.0122034	0.134223	-2.92565	4.3508	4.61936
TRHR	All Targets	RNA	Endogenous	1	1	33	10.5	7.33973	1	1	7201	FALSE	-0.793554	4.75439	-0.531272	4.58436	-2.87159	0.00525364	0.0959047	-2.21926	4.40884	4.84763
DSEL	All Targets	RNA	Endogenous	1	1	38	8	6.73828	1	1	92126	FALSE	0.52755	4.67156	-0.530802	4.46006	-2.44601	0.0166908	0.154717	-3.1614	4.28964	4.71569
CD19	All Targets	RNA	Endogenous	1	1	89	11.5	7.86793	1	1	930	FALSE	-0.278512	4.84045	-0.530514	4.68014	-2.50681	0.0142656	0.143676	-3.05797	4.52714	4.90963
BEND5	All Targets	RNA	Endogenous	1	1	42	11	8.17846	1	1	79656	FALSE	0.0154589	4.87158	-0.530483	4.71392	-2.84016	0.00574538	0.0981253	-2.31238	4.58856	4.90197
ITM2A	All Targets	RNA	Endogenous	1	1	38	10	8.21327	1	1	9452	FALSE	-0.372717	4.89103	-0.530141	4.73236	-2.88746	0.00502021	0.0945245	-2.19961	4.65242	4.85227
SBK2	All Targets	RNA	Endogenous	1	1	48	13	10.4362	1	1	646643	FALSE	0.563987	5.17414	-0.529917	5.05432	-2.91278	0.00466774	0.0922555	-2.1661	4.9274	5.24471
JSRP1	All Targets	RNA	Endogenous	1	1	37	10.5	8.27744	1	1	126306	FALSE	0.435109	4.88697	-0.529763	4.72653	-2.60382	0.0110282	0.129181	-2.84952	4.51483	5.04407
SLC16A10	All Targets	RNA	Endogenous	1	1	37	10	8.73808	1	1	117247	FALSE	0.35565	4.95462	-0.529645	4.79009	-2.49911	0.0146815	0.145986	-3.09625	4.66621	4.97591
KRTAP5-9	All Targets	RNA	Endogenous	1	1	47	14	11.207	1	1	3846	FALSE	0.229496	5.26139	-0.529606	5.14001	-2.93225	0.00441222	0.0902362	-2.10897	5.01771	5.32345
KCNK10	All Targets	RNA	Endogenous	1	1	36	9	7.47091	1	1	54207	FALSE	0.163908	4.77131	-0.529471	4.59815	-2.67695	0.00904918	0.117782	-2.67844	4.45564	4.81193
NTN5	All Targets	RNA	Endogenous	1	1	112	16	15.5936	1	1	126147	FALSE	1.18834	5.6755	-0.529059	5.58474	-3.16096	0.00223763	0.0695902	-1.54472	5.46446	5.76516
BPIFA3	All Targets	RNA	Endogenous	1	1	33	10	8.31213	1	1	128861	FALSE	0.546677	4.89291	-0.52898	4.73985	-2.54521	0.01289	0.13669	-2.98105	4.57623	4.98528
SERPINB10	All Targets	RNA	Endogenous	1	1	32	10	7.61245	1	1	5273	FALSE	0.0165625	4.79555	-0.528944	4.63008	-2.8423	0.00571061	0.0979811	-2.29758	4.51245	4.80652
IGLON5	All Targets	RNA	Endogenous	1	1	35	10.5	8.4946	1	1	402665	FALSE	0.208497	4.91988	-0.528872	4.75792	-2.71499	0.00815294	0.112692	-2.60824	4.65104	4.91823
IL16	All Targets	RNA	Endogenous	1	1	35	13	9.14689	1	1	3603	FALSE	-0.454359	5.02103	-0.52871	4.87522	-2.85291	0.00554095	0.0974149	-2.29264	4.78991	5.00319
KRTAP5-2	All Targets	RNA	Endogenous	1	1	40	9	8.01958	1	1	440021	FALSE	0.137099	4.8546	-0.528686	4.70095	-2.86507	0.00535238	0.0965462	-2.25092	4.63746	4.7962
GEMIN5	All Targets	RNA	Endogenous	1	1	32	10.5	8.48234	1	1	25929	FALSE	-0.642652	4.91373	-0.528392	4.76151	-2.81022	0.00625299	0.099931	-2.37773	4.61787	4.97698
CDIP1	All Targets	RNA	Endogenous	1	1	45	11	9.17463	1	1	29965	FALSE	0.0970123	5.00816	-0.528298	4.86535	-2.76664	0.00706538	0.106649	-2.48776	4.77276	5.00424
C1QC	All Targets	RNA	Endogenous	1	1	41	15	10.9756	1	1	714	FALSE	0.34499	5.22984	-0.528235	5.10523	-2.83708	0.00579588	0.0984426	-2.3439	4.98279	5.28888
GLIPR2	All Targets	RNA	Endogenous	1	1	32	10	8.06616	1	1	152007	FALSE	-0.22697	4.84491	-0.52822	4.68738	-2.80947	0.00626623	0.099931	-2.38112	4.58119	4.84667
N4BP2L1	All Targets	RNA	Endogenous	1	1	67	12.5	9.85226	1	1	90634	FALSE	0.720875	5.11256	-0.52817	4.98214	-2.74291	0.00754744	0.109471	-2.5375	4.78976	5.27072
CEP85L	All Targets	RNA	Endogenous	1	1	33	10.5	7.32706	1	1	387119	FALSE	0.410552	4.75358	-0.528132	4.57862	-2.65621	0.00957486	0.120356	-2.73515	4.5269	4.6562
OR5L2	All Targets	RNA	Endogenous	1	1	30	12.5	7.9699	1	1	26338	FALSE	0.470767	4.85704	-0.528078	4.6923	-2.53074	0.0133899	0.139289	-3.00178	4.47416	5.01952
P2RX4	All Targets	RNA	Endogenous	1	1	78	13	11.1224	1	1	5025	FALSE	-0.157394	5.24202	-0.528019	5.12548	-2.83748	0.00578924	0.0984225	-2.33808	4.99671	5.31863
MPDZ	All Targets	RNA	Endogenous	1	1	36	11.5	8.71345	1	1	8777	FALSE	0.445311	4.95555	-0.52779	4.81012	-2.7855	0.00670265	0.103351	-2.45054	4.71957	4.94595
HES2	All Targets	RNA	Endogenous	1	1	42	9.5	8.51177	1	1	54626	FALSE	0.0871555	4.9207	-0.52765	4.7755	-2.7783	0.00683903	0.104544	-2.46555	4.66754	4.93744
HS6ST2	All Targets	RNA	Endogenous	1	1	37	12	9.83928	1	1	90161	FALSE	-0.84273	5.08889	-0.527619	4.95529	-2.91221	0.00467531	0.0922555	-2.13871	4.79425	5.19686
CALN1	All Targets	RNA	Endogenous	1	1	40	11	8.69511	1	1	83698	FALSE	0.100286	4.95932	-0.527592	4.80853	-2.71593	0.00813184	0.112668	-2.60985	4.7127	4.95228
HIGD1B	All Targets	RNA	Endogenous	1	1	40	9.5	7.23671	1	1	51751	FALSE	0.452801	4.73814	-0.527497	4.5571	-2.66428	0.00936718	0.119059	-2.70934	4.45531	4.70977
ANTXRL	All Targets	RNA	Endogenous	1	1	39	11.5	9.03629	1	1	195977	FALSE	0.208304	4.99173	-0.527442	4.84833	-2.94363	0.00426897	0.0886201	-2.07257	4.72791	5.02897
IFNA6	All Targets	RNA	Endogenous	1	1	36	10	7.63121	1	1	3443	FALSE	0.0184927	4.78811	-0.52715	4.62765	-2.89243	0.00494922	0.0938028	-2.17472	4.4709	4.86276
H2BE1	All Targets	RNA	Endogenous	1	1	31	7.5	6.61124	1	1	114483833	FALSE	-0.386017	4.62175	-0.527075	4.43145	-2.62092	0.0105334	0.126635	-2.77663	4.26478	4.68146
LETM2	All Targets	RNA	Endogenous	1	1	42	10	7.59263	1	1	137994	FALSE	-0.196751	4.79759	-0.526904	4.63017	-2.6703	0.00921484	0.118433	-2.69444	4.51419	4.80414
SOBP	All Targets	RNA	Endogenous	1	1	25	8.5	6.27561	1	1	55084	FALSE	0.318362	4.57075	-0.526855	4.37311	-2.5276	0.0135007	0.139776	-3.0064	4.28698	4.50231
C3orf35	All Targets	RNA	Endogenous	1	1	37	11	8.23917	1	1	339883	FALSE	-0.614765	4.885	-0.526757	4.72945	-2.91606	0.00462379	0.0917535	-2.12345	4.6321	4.87547
SLC46A2	All Targets	RNA	Endogenous	1	1	50	12	8.36211	1	1	57864	FALSE	0.679119	4.92281	-0.526578	4.76343	-2.65241	0.00967399	0.121012	-2.75095	4.66178	4.91591
ACTG2	All Targets	RNA	Endogenous	1	1	42	13	10.1905	1	1	72	FALSE	0.0187726	5.14006	-0.526109	5.00994	-2.78544	0.00670369	0.103351	-2.45577	4.87465	5.21286
OSTN	All Targets	RNA	Endogenous	1	1	32	9	7.2831	1	1	344901	FALSE	0.575218	4.74146	-0.526008	4.56918	-2.62918	0.0103014	0.125637	-2.79225	4.43788	4.76614
ZADH2	All Targets	RNA	Endogenous	1	1	31	11	9.16597	1	1	284273	FALSE	-0.697769	4.99765	-0.525915	4.8577	-2.89981	0.00484529	0.0936756	-2.16631	4.72731	5.05328
TEX29	All Targets	RNA	Endogenous	1	1	46	10	7.8524	1	1	121793	FALSE	-0.232405	4.82668	-0.525824	4.6626	-2.69899	0.00851964	0.11495	-2.63163	4.54305	4.84192
SLC4A9	All Targets	RNA	Endogenous	1	1	34	9.5	6.96959	1	1	83697	FALSE	-0.162846	4.69043	-0.525271	4.50705	-2.65961	0.00948688	0.119751	-2.71236	4.36876	4.7145
PRKAR1B	All Targets	RNA	Endogenous	1	1	49	10	9.25446	1	1	5575	FALSE	-0.53925	5.01907	-0.525156	4.87859	-2.8756	0.00519368	0.0954981	-2.23003	4.74632	5.07699
AR	All Targets	RNA	Endogenous	1	1	26	10	7.66588	1	1	367	FALSE	-0.065249	4.79106	-0.52515	4.63137	-2.79101	0.00659988	0.10254	-2.4159	4.50598	4.81945
CFH	All Targets	RNA	Endogenous	1	1	48	13	13.6911	1	1	3075	FALSE	1.82053	5.52924	-0.525106	5.40777	-2.27895	0.0271575	0.189418	-3.61593	5.30433	5.56291
CLLU1-AS1	All Targets	RNA	Endogenous	1	1	42	10.5	7.40228	1	1	574016	FALSE	-0.108853	4.76081	-0.52508	4.58915	-2.71534	0.00814499	0.112668	-2.59275	4.44237	4.80931
LSM8	All Targets	RNA	Endogenous	1	2	49	14.5	13.7288	1	1	51691	FALSE	-0.842759	5.49685	-0.525063	5.3935	-3.21472	0.00189861	0.0650162	-1.38814	5.30698	5.5233
NLRP2B	All Targets	RNA	Endogenous	1	1	44	8	7.38335	1	1	286430	FALSE	-0.342893	4.76044	-0.524982	4.58526	-2.71058	0.00825249	0.113546	-2.59696	4.46629	4.7637
AEBP1	All Targets	RNA	Endogenous	1	1	60	13	11.7748	1	1	165	FALSE	0.549556	5.32495	-0.524438	5.20849	-2.62561	0.0104619	0.126547	-2.83632	5.02416	5.48498
GPR87	All Targets	RNA	Endogenous	1	1	51	14	11.1305	1	1	53836	FALSE	0.422287	5.25183	-0.524376	5.12975	-3.05937	0.00303753	0.0769537	-1.79864	5.05318	5.2446
ATP1B2	All Targets	RNA	Endogenous	1	1	29	8	6.4364	1	1	482	FALSE	0.537543	4.60714	-0.524299	4.40898	-2.52744	0.0135064	0.139776	-3.00671	4.30345	4.56728
KIF26A	All Targets	RNA	Endogenous	1	1	31	8.5	6.87562	1	1	26153	FALSE	-0.63064	4.65946	-0.524274	4.48026	-2.77475	0.00690729	0.105142	-2.44871	4.36886	4.64736
OR52M1	All Targets	RNA	Endogenous	1	1	54	16	11.2248	1	1	119772	FALSE	1.25377	5.2732	-0.524204	5.15346	-2.72372	0.00795894	0.112111	-2.60599	4.99687	5.38834
TOP2A	All Targets	RNA	Endogenous	1	1	53	14	11.6686	1	1	7153	FALSE	0.218773	5.30932	-0.523974	5.19216	-2.70449	0.00839184	0.114676	-2.64846	5.14817	5.25814
SEC14L5	All Targets	RNA	Endogenous	1	1	30	9.5	6.84349	1	1	9717	FALSE	-0.251102	4.66707	-0.523681	4.4885	-2.63988	0.0100081	0.123563	-2.76013	4.39414	4.63005
RGS8	All Targets	RNA	Endogenous	1	1	38	11.5	9.5896	1	1	85397	FALSE	-0.437492	5.06805	-0.523505	4.92675	-2.85195	0.00555611	0.0974275	-2.28768	4.81625	5.0925
SLN	All Targets	RNA	Endogenous	1	1	27	10	7.55181	1	1	6588	FALSE	0.125629	4.78244	-0.523026	4.61999	-2.69816	0.0085389	0.11495	-2.63428	4.51162	4.78254
NUDT10	All Targets	RNA	Endogenous	1	1	26	7	6.05388	1	1	170685	FALSE	0.323366	4.53006	-0.523011	4.32241	-2.581	0.0117219	0.131656	-2.88544	4.17407	4.5449
SLC9A2	All Targets	RNA	Endogenous	1	1	55	13.5	9.83792	1	1	6549	FALSE	-0.0622939	5.09323	-0.52292	4.96515	-2.64147	0.0099651	0.12338	-2.78698	4.84482	5.14564
COX4I2	All Targets	RNA	Endogenous	1	1	37	10	7.17468	1	1	84701	FALSE	0.110043	4.75315	-0.522864	4.56994	-2.74401	0.00752454	0.109282	-2.52644	4.42618	4.78559
IRX2	All Targets	RNA	Endogenous	1	1	32	10.5	7.7869	1	1	153572	FALSE	0.769426	4.83323	-0.52214	4.66278	-2.49525	0.0147332	0.146075	-3.09467	4.56392	4.81107
PTK7	All Targets	RNA	Endogenous	1	2	67	14.5	12.5723	1	1	5754	FALSE	-0.64113	5.39323	-0.522117	5.27647	-3.14443	0.00235278	0.0706357	-1.57619	5.23302	5.34165
SPDYE3	All Targets	RNA	Endogenous	1	2	41	15.5	11.3719	1	1	441272	FALSE	-0.40814	5.26231	-0.521943	5.14345	-3.03755	0.00324092	0.0791065	-1.8549	5.05883	5.27039
ZNF81	All Targets	RNA	Endogenous	1	1	42	10	8.36614	1	1	347344	FALSE	-0.334552	4.91094	-0.521905	4.76152	-2.89475	0.00491636	0.0938028	-2.18206	4.62263	4.96984
OR7G1	All Targets	RNA	Endogenous	1	1	37	9	6.45101	1	1	125962	FALSE	-0.153612	4.60418	-0.52183	4.4094	-2.6581	0.00952593	0.120076	-2.71906	4.31937	4.54444
PDGFRL	All Targets	RNA	Endogenous	1	1	27	9	6.55779	1	1	5157	FALSE	0.92726	4.63091	-0.521641	4.44329	-2.42539	0.0176329	0.158244	-3.22729	4.31356	4.63787
HAUS3	All Targets	RNA	Endogenous	1	1	28	11	7.75829	1	1	79441	FALSE	-0.19009	4.81718	-0.521541	4.65018	-2.75976	0.00720229	0.107504	-2.49653	4.52782	4.83371
ADRB3	All Targets	RNA	Endogenous	1	1	32	9	6.6559	1	1	155	FALSE	0.436629	4.64319	-0.521421	4.45103	-2.57627	0.0118703	0.13202	-2.90411	4.35242	4.59896
CHD5	All Targets	RNA	Endogenous	1	1	35	9	7.24435	1	1	26038	FALSE	0.367989	4.73269	-0.521305	4.55927	-2.69144	0.00869769	0.116223	-2.65984	4.43181	4.75046
PPP1R36	All Targets	RNA	Endogenous	1	1	45	13	9.02047	1	1	145376	FALSE	0.00321467	4.98847	-0.521165	4.83983	-2.81088	0.00624141	0.099931	-2.38777	4.74983	4.97482
ZFP2	All Targets	RNA	Endogenous	1	1	25	8.5	6.65613	1	1	80108	FALSE	0.95765	4.64005	-0.521034	4.4473	-2.53253	0.013327	0.139277	-3.01147	4.41332	4.49827
OR51A7	All Targets	RNA	Endogenous	1	1	38	11	7.90143	1	1	119687	FALSE	0.435167	4.83749	-0.520941	4.67583	-2.57959	0.0117659	0.13174	-2.90693	4.45926	5.00069
SLC9B1	All Targets	RNA	Endogenous	1	1	45	13	9.25671	1	1	150159	FALSE	0.266081	5.03733	-0.520938	4.89765	-2.73006	0.00782084	0.111229	-2.58109	4.73119	5.14733
C1S	All Targets	RNA	Endogenous	1	1	59	15.5	13.7486	1	1	716	FALSE	-0.0243815	5.51124	-0.520912	5.40811	-3.05962	0.00303526	0.0769537	-1.80212	5.30353	5.56498
ARMCX2	All Targets	RNA	Endogenous	1	1	29	9.5	7.16538	1	1	9823	FALSE	0.0457637	4.7231	-0.520811	4.54906	-2.57624	0.0118714	0.13202	-2.89936	4.40783	4.76092
OTX2	All Targets	RNA	Endogenous	1	1	34	10	6.54004	1	1	5015	FALSE	0.451893	4.65959	-0.520746	4.43447	-2.4126	0.0182458	0.160623	-3.2578	4.36698	4.5357
PLK5	All Targets	RNA	Endogenous	1	1	36	12	8.62479	1	1	126520	FALSE	0.292077	4.95108	-0.520344	4.7975	-2.68318	0.00889652	0.117158	-2.68022	4.71061	4.92783
KCNK5	All Targets	RNA	Endogenous	1	1	125	16	12.6483	1	1	8645	FALSE	0.16076	5.39746	-0.520335	5.29025	-2.92114	0.00455641	0.0912193	-2.1353	5.22264	5.39167
PTGES	All Targets	RNA	Endogenous	1	2	45	14	13.3736	1	1	9536	FALSE	1.44815	5.48155	-0.52011	5.35754	-2.52321	0.0142406	0.143584	-3.10733	5.30946	5.42967
ATAD1	All Targets	RNA	Endogenous	1	2	45	11	12.162	1	1	84896	FALSE	0.155564	5.35019	-0.519955	5.24137	-3.04643	0.00315666	0.0782496	-1.82998	5.11007	5.43831
SIGLEC10	All Targets	RNA	Endogenous	1	1	31	10	6.8315	1	1	89790	FALSE	0.0958757	4.68321	-0.519686	4.49086	-2.58614	0.0115622	0.130933	-2.88317	4.44597	4.5582
BAALC	All Targets	RNA	Endogenous	1	1	38	11.5	7.93775	1	1	79870	FALSE	0.568805	4.85413	-0.519647	4.69361	-2.68854	0.00876701	0.116622	-2.66766	4.57094	4.87762
TP53TG5	All Targets	RNA	Endogenous	1	1	35	11.5	8.66546	1	1	27296	FALSE	-0.760987	4.94661	-0.519639	4.79498	-2.7278	0.00786983	0.111425	-2.57226	4.62938	5.04339
GPR119	All Targets	RNA	Endogenous	1	1	46	14.5	9.86933	1	1	139760	FALSE	0.0566894	5.11292	-0.519472	4.98094	-2.86109	0.00541345	0.0970103	-2.28458	4.96659	5.00247
FNDC8	All Targets	RNA	Endogenous	1	1	39	12	8.48763	1	1	54752	FALSE	-0.268963	4.92961	-0.519413	4.77574	-2.79655	0.00649808	0.101395	-2.41317	4.68092	4.91796
MIPEP	All Targets	RNA	Endogenous	1	1	35	15	10.2273	1	1	4285	FALSE	0.215031	5.14707	-0.519113	5.01619	-2.68922	0.00875071	0.116491	-2.67196	4.86223	5.24713
GAMT	All Targets	RNA	Endogenous	1	1	39	9	7.78597	1	1	2593	FALSE	-0.524496	4.80965	-0.519089	4.64835	-2.86024	0.00542651	0.0970103	-2.24767	4.51708	4.84526
RP1	All Targets	RNA	Endogenous	1	1	42	11	8.00891	1	1	6101	FALSE	0.923156	4.86624	-0.519031	4.70647	-2.68041	0.00896409	0.117425	-2.6951	4.64411	4.80001
C11orf21	All Targets	RNA	Endogenous	1	1	45	9.5	7.52341	1	1	29125	FALSE	0.916289	4.78908	-0.519019	4.62324	-2.60871	0.0108846	0.1288	-2.84354	4.42347	4.9229
BTBD19	All Targets	RNA	Endogenous	1	1	41	13	10.9208	1	1	149478	FALSE	1.12095	5.23896	-0.518996	5.10367	-2.52418	0.013722	0.140955	-3.05241	5.01399	5.23818
WDR53	All Targets	RNA	Endogenous	1	1	32	11	8.20693	1	1	348793	FALSE	0.120168	4.88582	-0.518911	4.72551	-2.57452	0.0119257	0.132379	-2.91489	4.58405	4.93769
C8orf88	All Targets	RNA	Endogenous	1	1	33	10	6.99148	1	1	100127983	FALSE	1.00007	4.70912	-0.518694	4.52355	-2.3724	0.0202501	0.167632	-3.34166	4.39969	4.70935
INPP5J	All Targets	RNA	Endogenous	1	1	51	12	8.79687	1	1	27124	FALSE	-0.792502	4.9744	-0.518544	4.82709	-2.68978	0.00873729	0.116398	-2.67041	4.70372	5.01215
RARA	All Targets	RNA	Endogenous	1	1	83	13	13.1633	1	1	5914	FALSE	0.636852	5.46211	-0.518244	5.35141	-2.9255	0.00449933	0.0905791	-2.13567	5.21614	5.55432
BRIP1	All Targets	RNA	Endogenous	1	1	43	12	9.49534	1	1	83990	FALSE	0.0352537	5.06493	-0.517769	4.91755	-2.68284	0.00890474	0.117158	-2.68505	4.74497	5.1764
SYNGR1	All Targets	RNA	Endogenous	1	1	54	10	7.82667	1	1	9145	FALSE	-0.1139	4.81995	-0.517657	4.664	-2.67016	0.00921835	0.118433	-2.70566	4.53978	4.85032
DHRSX	All Targets	RNA	Endogenous	1	1	44	10	8.95287	1	1	207063	FALSE	0.392482	4.97956	-0.517531	4.82874	-2.64672	0.00982446	0.122216	-2.75341	4.62314	5.13715
IGFL1	All Targets	RNA	Endogenous	1	1	36	11.5	8.28672	1	1	374918	FALSE	0.0961013	4.88933	-0.517145	4.73458	-2.64119	0.00997276	0.12338	-2.77349	4.56244	4.99278
GABRB2	All Targets	RNA	Endogenous	1	1	43	10.5	8.42326	1	1	2561	FALSE	-0.208263	4.91414	-0.516963	4.75702	-2.94075	0.0043049	0.0888465	-2.08612	4.70856	4.82972
PRR25	All Targets	RNA	Endogenous	1	1	49	14	9.05434	1	1	388199	FALSE	-0.0301516	5.0123	-0.51695	4.87053	-2.81281	0.00620749	0.099931	-2.38689	4.76374	5.03072
FXYD1	All Targets	RNA	Endogenous	1	1	30	10	7.68405	1	1	5348	FALSE	0.248338	4.80715	-0.516891	4.64127	-2.61635	0.0106636	0.127384	-2.81818	4.48112	4.8815
MEX3A	All Targets	RNA	Endogenous	1	1	34	12	10.0885	1	1	92312	FALSE	0.0571157	5.12108	-0.516887	4.98188	-2.74488	0.0075063	0.109199	-2.53205	4.83577	5.20106
ULBP3	All Targets	RNA	Endogenous	1	1	32	11	8.79737	1	1	79465	FALSE	-0.0347011	4.95612	-0.516738	4.80954	-2.79443	0.00653696	0.101913	-2.43251	4.71827	4.94644
IL12A	All Targets	RNA	Endogenous	1	1	26	8	6.70412	1	1	3592	FALSE	-0.159517	4.63904	-0.516733	4.45938	-2.64245	0.0099388	0.123214	-2.74879	4.31771	4.6719
METTL3	All Targets	RNA	Endogenous	1	1	42	12	10.6361	1	1	56339	FALSE	0.0908213	5.18405	-0.516528	5.0531	-2.83545	0.00582271	0.0988054	-2.34086	4.99899	5.13425
OR6N1	All Targets	RNA	Endogenous	1	1	27	7.5	6.34019	1	1	128372	FALSE	0.568467	4.59531	-0.516345	4.39153	-2.35147	0.021218	0.170471	-3.35901	4.15133	4.75181
PLS3	All Targets	RNA	Endogenous	1	1	97	18	16.0702	1	1	5358	FALSE	0.305704	5.71283	-0.515798	5.62333	-2.97053	0.00394734	0.0854767	-2.03645	5.51459	5.78643
SLC4A1	All Targets	RNA	Endogenous	1	1	25	6.5	5.21691	1	1	6521	FALSE	0.197529	4.36438	-0.515712	4.13074	-2.2443	0.0276406	0.191015	-3.53476	3.96159	4.38447
RGS9	All Targets	RNA	Endogenous	1	1	36	12.5	8.4407	1	1	8787	FALSE	0.00665835	4.92154	-0.515672	4.77311	-2.8816	0.00510531	0.0947216	-2.21579	4.63812	4.97561
ZSCAN5C	All Targets	RNA	Endogenous	1	1	35	10.5	8.21732	1	1	649137	FALSE	0.204513	4.88474	-0.515434	4.72331	-2.7005	0.0084844	0.114891	-2.64143	4.62009	4.87814
ZBED8	All Targets	RNA	Endogenous	1	1	29	10.5	7.53609	1	1	63920	FALSE	0.324648	4.77378	-0.515274	4.60174	-2.56076	0.0123695	0.135212	-2.94518	4.47525	4.79148
TSPEAR	All Targets	RNA	Endogenous	1	1	44	10	7.49111	1	1	54084	FALSE	-0.119415	4.79044	-0.515028	4.60974	-2.58946	0.0114603	0.130423	-2.87085	4.47665	4.80936
SRPX2	All Targets	RNA	Endogenous	1	1	29	11.5	10.623	1	1	27286	FALSE	0.0794664	5.18024	-0.514877	5.0444	-2.68301	0.00890079	0.117158	-2.69614	4.95723	5.17516
CDC25A	All Targets	RNA	Endogenous	1	1	20	9	6.30238	1	1	993	FALSE	0.294929	4.57983	-0.514707	4.37287	-2.49407	0.0147387	0.146075	-3.07895	4.32859	4.4393
OR8B8	All Targets	RNA	Endogenous	1	1	39	11	8.16968	1	1	26493	FALSE	-0.371129	4.8682	-0.514463	4.71379	-2.79179	0.00658549	0.102486	-2.42753	4.62877	4.84132
COASY	All Targets	RNA	Endogenous	1	1	50	15.5	11.5204	1	1	80347	FALSE	-0.119395	5.28541	-0.514419	5.17234	-2.75574	0.00728327	0.107974	-2.5407	5.09321	5.29104
MKRN3	All Targets	RNA	Endogenous	1	1	51	11	8.82367	1	1	7681	FALSE	0.148789	4.97082	-0.514318	4.82677	-2.59448	0.0113074	0.129705	-2.87398	4.72627	4.97751
CLBA1	All Targets	RNA	Endogenous	1	1	46	13	9.45501	1	1	122616	FALSE	0.424528	5.05173	-0.514223	4.90819	-2.72375	0.00795826	0.112111	-2.60115	4.7852	5.09268
CALY	All Targets	RNA	Endogenous	1	1	33	11	8.41439	1	1	50632	FALSE	-0.267256	4.91308	-0.513857	4.75663	-2.88982	0.00498641	0.0941832	-2.19738	4.72371	4.80601
ATP5MC2	All Targets	RNA	Endogenous	1	28	7068	323.5	364.487	1	1	517	FALSE	1.01774	10.0713	-0.513768	10.0617	-2.28619	0.0298489	0.198165	-3.96166	9.83522	10.4015
PDXP	All Targets	RNA	Endogenous	1	1	41	12	9.16574	1	1	57026	FALSE	-0.390607	5.01625	-0.513716	4.87542	-2.94904	0.00420241	0.0882457	-2.05911	4.78864	5.00559
C5orf34	All Targets	RNA	Endogenous	1	1	40	10	6.99566	1	1	375444	FALSE	0.545487	4.70614	-0.513582	4.52852	-2.62682	0.0103674	0.126069	-2.78988	4.31481	4.8491
ADAMTS15	All Targets	RNA	Endogenous	1	1	33	12.5	7.57968	1	1	170689	FALSE	0.439491	4.79042	-0.513577	4.62834	-2.5994	0.0111596	0.129576	-2.8398	4.43271	4.92178
NDNF	All Targets	RNA	Endogenous	1	1	41	13.5	9.62079	1	1	79625	FALSE	0.0212365	5.07427	-0.513554	4.93813	-2.80362	0.00637016	0.100441	-2.40506	4.78483	5.16808
SETD9	All Targets	RNA	Endogenous	1	1	43	14	10.6385	1	1	133383	FALSE	0.124805	5.19752	-0.513536	5.06965	-2.75822	0.00723315	0.107582	-2.51253	4.98264	5.20016
WSCD2	All Targets	RNA	Endogenous	1	1	42	9	6.7034	1	1	9671	FALSE	0.980682	4.66351	-0.513448	4.47191	-2.28236	0.0254518	0.184823	-3.51888	4.32321	4.69496
CDH11	All Targets	RNA	Endogenous	1	1	37	13.5	10.5958	1	1	1009	FALSE	-0.361113	5.1811	-0.513372	5.05635	-2.73126	0.00779502	0.111064	-2.58382	4.90242	5.28726
SFRP2	All Targets	RNA	Endogenous	1	1	63	15	13.6823	1	1	6423	FALSE	0.570478	5.50628	-0.513	5.40039	-2.40029	0.0197557	0.16599	-3.37224	5.26918	5.59719
CAV3	All Targets	RNA	Endogenous	1	1	36	11	8.4445	1	1	859	FALSE	-0.0161231	4.91266	-0.512905	4.75825	-2.82144	0.00605817	0.0992631	-2.35344	4.65855	4.9078
SLC1A2	All Targets	RNA	Endogenous	1	1	32	5.5	4.89275	1	1	6506	FALSE	0.824012	4.30065	-0.5128	4.05102	-2.26123	0.0265259	0.187918	-3.52601	3.86419	4.33126
DUSP9	All Targets	RNA	Endogenous	1	1	43	9	6.22059	1	1	1852	FALSE	0.152667	4.57291	-0.512766	4.36911	-2.2585	0.026863	0.189028	-3.55286	4.2723	4.51432
SLC6A7	All Targets	RNA	Endogenous	1	1	50	16	11.6341	1	1	6534	FALSE	-0.184465	5.30987	-0.512709	5.19645	-2.9831	0.00380481	0.08421	-1.98949	5.0912	5.35433
ACTL10	All Targets	RNA	Endogenous	1	1	39	10	8.35141	1	1	170487	FALSE	0.100667	4.90048	-0.512638	4.75061	-2.59721	0.0112253	0.129631	-2.86664	4.58849	4.99379
TUBB1	All Targets	RNA	Endogenous	1	1	38	11	8.01267	1	1	81027	FALSE	-0.0753805	4.86386	-0.512565	4.69965	-2.70856	0.00829841	0.113917	-2.62905	4.6324	4.80053
ZSCAN26	All Targets	RNA	Endogenous	1	1	33	13	10.3434	1	1	7741	FALSE	-0.411516	5.15462	-0.512225	5.02587	-2.93293	0.00440357	0.0902362	-2.10385	4.91715	5.18896
SPATA22	All Targets	RNA	Endogenous	1	1	41	10.5	7.26737	1	1	84690	FALSE	-0.0565363	4.75187	-0.512053	4.57364	-2.90587	0.00476156	0.0926527	-2.14376	4.43382	4.78338
RNFT2	All Targets	RNA	Endogenous	1	1	36	13	9.18186	1	1	84900	FALSE	-0.0776408	5.01295	-0.511712	4.87622	-2.82034	0.00607693	0.0992631	-2.3655	4.78095	5.01913
PLA2G5	All Targets	RNA	Endogenous	1	1	37	11	8.2216	1	1	5322	FALSE	-0.285297	4.8746	-0.511578	4.72343	-2.72042	0.00803186	0.112368	-2.58975	4.5921	4.92042
SYNJ1	All Targets	RNA	Endogenous	1	1	41	11	8.40179	1	1	8867	FALSE	-0.538164	4.9048	-0.511289	4.75659	-2.83396	0.00584729	0.0988449	-2.32565	4.62684	4.95122
FABP12	All Targets	RNA	Endogenous	1	1	46	9	8.00472	1	1	646486	FALSE	0.201685	4.8539	-0.511259	4.69778	-2.5056	0.0143019	0.1438	-3.06198	4.49856	4.99661
TAS2R40	All Targets	RNA	Endogenous	1	1	38	12	8.77694	1	1	259286	FALSE	-0.710082	4.96446	-0.511229	4.81673	-2.85309	0.00553812	0.0974149	-2.27506	4.67452	5.03004
PDHA2	All Targets	RNA	Endogenous	1	1	38	11	9.16802	1	1	5161	FALSE	0.0676034	5.02676	-0.511219	4.88208	-3.05051	0.00311864	0.0778287	-1.80869	4.85942	4.91607
GALP	All Targets	RNA	Endogenous	1	1	37	7	5.91276	1	1	85569	FALSE	0.6095	4.53042	-0.511199	4.29233	-2.37099	0.0202025	0.1674	-3.3269	4.24677	4.36066
DPYSL5	All Targets	RNA	Endogenous	1	1	39	10.5	8.49247	1	1	56896	FALSE	-0.162607	4.9203	-0.510962	4.76834	-2.6808	0.00895457	0.117406	-2.69074	4.67295	4.91144
TBL1Y	All Targets	RNA	Endogenous	1	1	31	9	6.67539	1	1	90665	FALSE	-0.308448	4.6424	-0.510959	4.45191	-2.7157	0.00813692	0.112668	-2.59374	4.36492	4.5824
RAB36	All Targets	RNA	Endogenous	1	1	46	13.5	10.468	1	1	9609	FALSE	0.427684	5.172	-0.510921	5.04011	-2.74457	0.00751282	0.109199	-2.54554	4.91335	5.23026
OR5B3	All Targets	RNA	Endogenous	1	1	30	10	7.10015	1	1	441608	FALSE	0.177365	4.71963	-0.510807	4.54108	-2.62052	0.0105447	0.126635	-2.81108	4.47108	4.64608
MEFV	All Targets	RNA	Endogenous	1	1	24	9	6.8483	1	1	4210	FALSE	0.131837	4.66744	-0.510801	4.47825	-2.66812	0.00926982	0.118841	-2.70081	4.3318	4.69793
P2RY12	All Targets	RNA	Endogenous	1	1	44	9.5	7.26021	1	1	64805	FALSE	-0.274319	4.76247	-0.510781	4.57839	-2.69436	0.00862856	0.115547	-2.64297	4.51589	4.67213
CPZ	All Targets	RNA	Endogenous	1	1	40	12.5	8.66015	1	1	8532	FALSE	0.190096	4.96341	-0.510629	4.81271	-2.6847	0.00885971	0.117078	-2.6719	4.67891	5.01341
OR51L1	All Targets	RNA	Endogenous	1	1	32	10.5	7.58506	1	1	119682	FALSE	0.438588	4.78272	-0.510602	4.62024	-2.78476	0.00671645	0.10346	-2.43105	4.39609	4.95645
OTOR	All Targets	RNA	Endogenous	1	1	42	12.5	8.30499	1	1	56914	FALSE	0.219379	4.90502	-0.510412	4.7537	-2.75272	0.00734475	0.108243	-2.51543	4.59766	4.98775
ACER2	All Targets	RNA	Endogenous	1	1	51	10	9.74117	1	1	340485	FALSE	0.161735	5.07986	-0.510296	4.94139	-2.49556	0.0146815	0.145986	-3.09067	4.79965	5.15401
DHRS13	All Targets	RNA	Endogenous	1	1	39	13	10.4604	1	1	147015	FALSE	0.118284	5.16639	-0.510141	5.04459	-2.75221	0.00735508	0.108243	-2.54012	4.94198	5.1985
PEX5L	All Targets	RNA	Endogenous	1	1	36	11	8.36503	1	1	51555	FALSE	0.508475	4.90555	-0.510084	4.74938	-2.53088	0.0133847	0.139289	-3.01903	4.61091	4.95707
TM4SF18	All Targets	RNA	Endogenous	1	1	32	9	7.38177	1	1	116441	FALSE	0.937633	4.75641	-0.510007	4.5734	-2.40221	0.0186921	0.161674	-3.28051	4.51866	4.65552
B4GALNT2	All Targets	RNA	Endogenous	1	1	41	10	7.94478	1	1	124872	FALSE	0.180903	4.85166	-0.509864	4.68287	-2.64976	0.00974384	0.121549	-2.74262	4.60922	4.79335
GREM1	All Targets	RNA	Endogenous	1	1	53	13	9.98218	1	1	26585	FALSE	0.69603	5.12384	-0.509853	4.98112	-2.38349	0.0199752	0.166888	-3.35653	4.83943	5.19366
TLX3	All Targets	RNA	Endogenous	1	1	70	9.5	7.06884	1	1	30012	FALSE	0.159195	4.7136	-0.509765	4.53405	-2.30478	0.0239608	0.179186	-3.4719	4.41988	4.7053
EIF2B2	All Targets	RNA	Endogenous	1	1	56	12	10.891	1	1	8892	FALSE	-0.939424	5.21342	-0.509663	5.08722	-2.92579	0.00449551	0.0905791	-2.12015	4.99829	5.22063
NAP1L2	All Targets	RNA	Endogenous	1	1	37	14	10.1668	1	1	4674	FALSE	1.0077	5.15087	-0.50966	5.02314	-2.96383	0.00402535	0.0866459	-2.03972	4.97393	5.09696
FSIP2	All Targets	RNA	Endogenous	1	1	47	14.5	10.8528	1	1	401024	FALSE	0.448122	5.22939	-0.509438	5.0919	-2.7536	0.00732679	0.10824	-2.52734	4.97051	5.27399
NEURL1B	All Targets	RNA	Endogenous	1	1	27	11	9.71562	1	1	54492	FALSE	-0.465925	5.07067	-0.509304	4.92676	-2.72002	0.00804058	0.112368	-2.60582	4.78755	5.13558
SLC24A5	All Targets	RNA	Endogenous	1	1	48	11	8.13708	1	1	283652	FALSE	-0.793292	4.86875	-0.509294	4.71229	-2.99736	0.00364901	0.0830002	-1.92344	4.61883	4.85248
SLC16A7	All Targets	RNA	Endogenous	1	1	35	11	10.6161	1	1	9194	FALSE	0.130767	5.18119	-0.50912	5.04708	-2.73543	0.00770541	0.110485	-2.57445	4.9644	5.17112
C10orf143	All Targets	RNA	Endogenous	1	1	40	12.5	8.33812	1	1	387723	FALSE	0.211607	4.91545	-0.509058	4.754	-2.56034	0.0123833	0.135212	-2.94846	4.57985	5.01522
MARCO	All Targets	RNA	Endogenous	1	1	39	9	6.92218	1	1	8685	FALSE	0.544697	4.68049	-0.508873	4.49985	-2.62248	0.0104893	0.126547	-2.81693	4.42818	4.60736
HSPB2	All Targets	RNA	Endogenous	1	1	41	13.5	7.86948	1	1	3316	FALSE	0.118806	4.83734	-0.508807	4.67525	-2.72092	0.00802076	0.112328	-2.5824	4.45834	5.00061
C10orf82	All Targets	RNA	Endogenous	1	1	35	10	8.06553	1	1	143379	FALSE	0.141919	4.85853	-0.508694	4.69758	-2.52258	0.01368	0.140618	-3.03269	4.53768	4.93742
DPYSL3	All Targets	RNA	Endogenous	1	2	37	14	12.3288	1	1	1809	FALSE	0.0606618	5.36208	-0.508625	5.24592	-2.76894	0.00702017	0.106144	-2.51453	5.13748	5.40857
TMEM272	All Targets	RNA	Endogenous	1	1	39	9	8.12502	1	1	283521	FALSE	0.0180234	4.8615	-0.508589	4.70276	-2.59091	0.011416	0.130158	-2.87161	4.56573	4.90829
DEFB133	All Targets	RNA	Endogenous	1	1	30	8.5	6.13765	1	1	403339	FALSE	0.0380107	4.55436	-0.508541	4.34781	-2.41774	0.0179442	0.159576	-3.2321	4.25777	4.48288
DSC1	All Targets	RNA	Endogenous	1	1	34	11	8.63392	1	1	1823	FALSE	0.640944	4.94505	-0.508503	4.78655	-2.45297	0.0164379	0.15346	-3.19008	4.6809	4.94503
KHDC1L	All Targets	RNA	Endogenous	1	1	24	9	6.92495	1	1	100129128	FALSE	-1.26239	4.66715	-0.508502	4.48928	-2.85687	0.00547886	0.0970639	-2.26248	4.39687	4.62788
AOX1	All Targets	RNA	Endogenous	1	1	29	11	7.86124	1	1	316	FALSE	0.324558	4.83719	-0.508461	4.67439	-2.57885	0.011789	0.131886	-2.90979	4.51976	4.90635
TDO2	All Targets	RNA	Endogenous	1	1	68	11	7.68277	1	1	6999	FALSE	-0.362519	4.81816	-0.508375	4.64728	-2.54319	0.0129579	0.136928	-2.96607	4.51955	4.83886
CTXND1	All Targets	RNA	Endogenous	1	1	31	8	6.2162	1	1	100996492	FALSE	0.651485	4.55878	-0.50835	4.34867	-2.27777	0.0254718	0.184894	-3.49976	4.24146	4.50949
OR2J1	All Targets	RNA	Endogenous	1	1	41	11	8.55002	1	1	442185	FALSE	0.445336	4.93509	-0.508312	4.78122	-2.65051	0.00972405	0.12147	-2.74314	4.63075	5.00691
TMEM131L	All Targets	RNA	Endogenous	1	1	62	13	8.88364	1	1	23240	FALSE	0.310163	4.98696	-0.508157	4.8435	-2.55923	0.0124196	0.135457	-2.96435	4.74694	4.98834
TRAM1L1	All Targets	RNA	Endogenous	1	1	32	9	6.21045	1	1	133022	FALSE	-0.177452	4.56826	-0.507985	4.35428	-2.35402	0.0210831	0.170307	-3.34719	4.17432	4.62423
FAXDC2	All Targets	RNA	Endogenous	1	1	36	11.5	8.19017	1	1	10826	FALSE	-0.401863	4.88632	-0.507889	4.72524	-2.75166	0.00736623	0.10829	-2.51637	4.61051	4.89733
AOC3	All Targets	RNA	Endogenous	1	1	47	12	8.85192	1	1	8639	FALSE	0.361188	4.99512	-0.507867	4.85058	-2.68086	0.00895308	0.117406	-2.70155	4.8225	4.89269
ACADM	All Targets	RNA	Endogenous	1	2	67	17.5	13.3682	1	1	34	FALSE	0.185385	5.46661	-0.507676	5.36273	-2.82549	0.00598923	0.0992631	-2.39834	5.2937	5.46626
GPR55	All Targets	RNA	Endogenous	1	1	35	10	7.91177	1	1	9290	FALSE	-0.171668	4.83345	-0.507472	4.67484	-2.76166	0.00716417	0.107174	-2.5046	4.59185	4.79932
CROT	All Targets	RNA	Endogenous	1	1	38	11.5	8.16983	1	1	54677	FALSE	-0.143503	4.8836	-0.507433	4.72017	-2.64989	0.00974037	0.121549	-2.74361	4.54575	4.98182
GNAT2	All Targets	RNA	Endogenous	1	1	47	12	7.98614	1	1	2780	FALSE	0.43954	4.86321	-0.507294	4.70506	-2.71722	0.00810308	0.112668	-2.60903	4.69099	4.72617
MEP1B	All Targets	RNA	Endogenous	1	1	31	10	7.69918	1	1	4225	FALSE	0.114707	4.8109	-0.507269	4.6459	-2.57493	0.0119126	0.132379	-2.90324	4.48523	4.88692
MAS1	All Targets	RNA	Endogenous	1	1	34	14.5	9.85552	1	1	4142	FALSE	-0.126619	5.09773	-0.507219	4.97139	-2.94415	0.00426255	0.0886201	-2.07682	4.85348	5.14825
OR5H1	All Targets	RNA	Endogenous	1	1	39	14	9.28298	1	1	26341	FALSE	0.147025	5.02679	-0.507126	4.88759	-2.53525	0.0132317	0.138602	-3.00561	4.75954	5.07967
MAGEB16	All Targets	RNA	Endogenous	1	1	34	10	6.48664	1	1	139604	FALSE	0.344333	4.6318	-0.507008	4.42576	-2.61123	0.0108113	0.128467	-2.82363	4.28995	4.62948
CCDC168	All Targets	RNA	Endogenous	1	1	30	10.5	7.61143	1	1	643677	FALSE	0.814952	4.80334	-0.506983	4.63449	-2.36061	0.0209343	0.170085	-3.38278	4.51835	4.8087
RNF14	All Targets	RNA	Endogenous	1	1	37	14.5	13.4477	1	1	9604	FALSE	-0.380495	5.47169	-0.506909	5.36866	-2.85184	0.00555787	0.0974275	-2.31711	5.25325	5.54179
DBX1	All Targets	RNA	Endogenous	1	1	45	12	9.16595	1	1	120237	FALSE	0.191494	5.01798	-0.50689	4.87522	-2.62124	0.0105244	0.126635	-2.8232	4.76437	5.0415
SLC7A7	All Targets	RNA	Endogenous	1	1	73	12.5	10.7794	1	1	9056	FALSE	-0.210918	5.20414	-0.5068	5.08696	-2.83378	0.00585025	0.0988449	-2.339	4.92861	5.32449
FBN1	All Targets	RNA	Endogenous	1	1	34	11.5	8.26285	1	1	2200	FALSE	0.498098	4.89508	-0.506776	4.74059	-2.28731	0.0252791	0.184295	-3.52723	4.54591	5.0326
OASL	All Targets	RNA	Endogenous	1	1	33	9	9.05377	1	1	8638	FALSE	0.244742	4.98909	-0.506603	4.84425	-2.6165	0.0106593	0.127384	-2.83145	4.7378	5.00393
TMEM63C	All Targets	RNA	Endogenous	1	1	36	6.5	6.11805	1	1	57156	FALSE	0.0265687	4.54948	-0.506571	4.33773	-2.33132	0.0223132	0.172759	-3.37825	4.16214	4.60112
SNAI2	All Targets	RNA	Endogenous	1	1	52	13	9.96318	1	1	6591	FALSE	0.209955	5.11678	-0.506543	4.98653	-2.76014	0.00719464	0.107504	-2.5199	4.82657	5.22647
SAMD4A	All Targets	RNA	Endogenous	1	1	44	15.5	10.4672	1	1	23034	FALSE	0.469669	5.17657	-0.506464	5.05779	-2.76508	0.00709621	0.106845	-2.51931	4.9202	5.26416
POP1	All Targets	RNA	Endogenous	1	1	42	12	7.97264	1	1	10940	FALSE	0.167053	4.85328	-0.506382	4.69221	-2.4713	0.0156364	0.149707	-3.14555	4.57935	4.86151
PYGL	All Targets	RNA	Endogenous	1	1	66	12.5	9.43032	1	1	5836	FALSE	0.645134	5.05578	-0.506371	4.91407	-2.68074	0.00895612	0.117406	-2.68991	4.73635	5.18065
TMEM235	All Targets	RNA	Endogenous	1	1	28	9.5	6.3062	1	1	283999	FALSE	0.157835	4.57989	-0.506195	4.38491	-2.509	0.0141754	0.143408	-3.03244	4.21483	4.64002
CXCL13	All Targets	RNA	Endogenous	1	1	48	15.5	9.98812	1	1	10563	FALSE	0.29335	5.12347	-0.505959	4.99831	-2.74464	0.00751141	0.109199	-2.54433	4.79354	5.30546
ARMT1	All Targets	RNA	Endogenous	1	1	38	13	9.61279	1	1	79624	FALSE	0.395168	5.07301	-0.505905	4.93361	-2.69123	0.00870283	0.116223	-2.67617	4.79998	5.13406
CDH6	All Targets	RNA	Endogenous	1	1	40	9.5	7.84653	1	1	1004	FALSE	0.372623	4.84558	-0.505892	4.67435	-2.54664	0.0128403	0.136663	-2.98553	4.62104	4.75431
C3orf85	All Targets	RNA	Endogenous	1	1	34	8	6.72093	1	1	401081	FALSE	0.011064	4.64711	-0.505583	4.46144	-2.55079	0.0127004	0.136526	-2.95096	4.31508	4.68099
ZNF654	All Targets	RNA	Endogenous	1	1	67	15.5	13.5386	1	1	55279	FALSE	0.18526	5.49176	-0.505492	5.37987	-2.82381	0.00601762	0.0992631	-2.38264	5.28444	5.52301
EZHIP	All Targets	RNA	Endogenous	1	1	31	8	6.91508	1	1	340602	FALSE	-0.154841	4.67538	-0.505465	4.48633	-2.70335	0.00841821	0.114797	-2.62314	4.3831	4.64118
SH2D1A	All Targets	RNA	Endogenous	1	1	21	6.5	5.87281	1	1	4068	FALSE	0.308111	4.49377	-0.505458	4.27776	-2.24142	0.0278344	0.191468	-3.56544	4.09375	4.55379
PLSCR4	All Targets	RNA	Endogenous	1	1	41	8.5	6.68976	1	1	57088	FALSE	0.732181	4.66007	-0.505347	4.44905	-2.23445	0.0284739	0.19316	-3.60169	4.30614	4.66341
SSC5D	All Targets	RNA	Endogenous	1	1	44	8	6.80418	1	1	284297	FALSE	0.0399411	4.67022	-0.505276	4.48026	-2.49022	0.014887	0.146905	-3.09096	4.42057	4.5698
ASB9	All Targets	RNA	Endogenous	1	1	31	12.5	8.91625	1	1	140462	FALSE	-0.178836	4.9828	-0.505222	4.8354	-2.62856	0.0103186	0.125761	-2.7948	4.63649	5.13376
C11orf53	All Targets	RNA	Endogenous	1	1	37	14.5	8.74532	1	1	341032	FALSE	0.21567	4.96162	-0.50517	4.81886	-2.75566	0.00728487	0.107974	-2.51566	4.67019	5.04185
ARHGAP29	All Targets	RNA	Endogenous	1	1	47	15.5	10.9299	1	1	9411	FALSE	0.299529	5.23396	-0.505135	5.11107	-2.52529	0.0138117	0.141233	-3.07971	5.06678	5.1775
MEGF11	All Targets	RNA	Endogenous	1	1	39	12	9.35593	1	1	84465	FALSE	-0.527453	5.03562	-0.504831	4.8976	-2.80909	0.00627281	0.099931	-2.39336	4.78292	5.06962
NWD1	All Targets	RNA	Endogenous	1	1	40	11	8.79751	1	1	284434	FALSE	-0.433321	4.97091	-0.504823	4.82173	-2.86052	0.00542228	0.0970103	-2.27781	4.82156	4.82199
PLCZ1	All Targets	RNA	Endogenous	1	1	36	8.5	7.26023	1	1	89869	FALSE	0.389183	4.74233	-0.504677	4.56538	-2.62283	0.0104794	0.126547	-2.81457	4.54874	4.59034
SPACA7	All Targets	RNA	Endogenous	1	1	33	10	8.06311	1	1	122258	FALSE	0.230173	4.86655	-0.504629	4.70624	-2.43216	0.0173176	0.157368	-3.22962	4.61768	4.83908
CLNK	All Targets	RNA	Endogenous	1	1	50	11.5	8.59595	1	1	116449	FALSE	1.06551	4.94048	-0.504182	4.79781	-2.70405	0.00840206	0.114729	-2.64316	4.60381	5.08882
UNC93A	All Targets	RNA	Endogenous	1	1	33	10	7.55812	1	1	54346	FALSE	0.224203	4.78801	-0.504142	4.62042	-2.5393	0.0130915	0.137774	-2.9876	4.52696	4.76061
HEYL	All Targets	RNA	Endogenous	1	1	41	12.5	8.07005	1	1	26508	FALSE	0.367762	4.88889	-0.5039	4.72323	-2.59987	0.0111456	0.129576	-2.86382	4.56752	4.95679
TCEAL8	All Targets	RNA	Endogenous	1	1	62	14.5	11.8635	1	1	90843	FALSE	0.486147	5.32755	-0.503857	5.21022	-2.57161	0.0120183	0.133161	-2.94676	5.02136	5.49351
VMAC	All Targets	RNA	Endogenous	1	1	38	10	8.76067	1	1	400673	FALSE	0.0321492	4.9435	-0.503735	4.79178	-2.50751	0.0142307	0.143565	-3.05697	4.67878	4.96128
HS3ST5	All Targets	RNA	Endogenous	1	1	22	7.5	6.44688	1	1	222537	FALSE	0.336059	4.60229	-0.503731	4.40441	-2.33127	0.0223162	0.172759	-3.40847	4.28785	4.57926
IPCEF1	All Targets	RNA	Endogenous	1	1	27	11.5	7.54669	1	1	26034	FALSE	-0.198283	4.79652	-0.503591	4.6216	-2.53874	0.0131107	0.13781	-2.98434	4.52541	4.76587
ORC3	All Targets	RNA	Endogenous	1	1	50	13.5	10.2305	1	1	23595	FALSE	0.382357	5.14513	-0.503583	5.01342	-2.44175	0.0172686	0.157243	-3.25713	4.95147	5.10635
IL23R	All Targets	RNA	Endogenous	1	1	37	12	8.74092	1	1	149233	FALSE	-0.158776	4.9814	-0.503445	4.83115	-2.77892	0.00682731	0.104537	-2.46113	4.77124	4.921
FLT1	All Targets	RNA	Endogenous	1	1	41	11.5	8.41396	1	1	2321	FALSE	0.285867	4.91894	-0.5033	4.76119	-2.8038	0.006367	0.100441	-2.40355	4.6362	4.94868
GPR32	All Targets	RNA	Endogenous	1	1	47	13	9.61802	1	1	2854	FALSE	-0.140845	5.06926	-0.503118	4.93662	-2.70147	0.00846185	0.114797	-2.651	4.80069	5.14052
ILDR2	All Targets	RNA	Endogenous	1	1	39	13	10.0201	1	1	387597	FALSE	0.0688518	5.1253	-0.503048	4.99442	-2.54763	0.0128067	0.136663	-2.99435	4.80427	5.27964
SUN5	All Targets	RNA	Endogenous	1	1	34	11	7.83748	1	1	140732	FALSE	0.0190011	4.84031	-0.502721	4.67916	-2.76397	0.00711833	0.106911	-2.48779	4.53212	4.89973
PEX12	All Targets	RNA	Endogenous	1	1	35	9.5	8.7101	1	1	5193	FALSE	0.256537	4.94342	-0.50271	4.78433	-2.54903	0.0127596	0.13666	-2.99392	4.75206	4.83274
ANKRD61	All Targets	RNA	Endogenous	1	1	27	7.5	6.49858	1	1	100310846	FALSE	0.339419	4.62195	-0.502504	4.41947	-2.42809	0.0174762	0.157697	-3.2157	4.27058	4.6428
SLC9C1	All Targets	RNA	Endogenous	1	1	44	10	8.16224	1	1	285335	FALSE	-0.485275	4.88494	-0.50239	4.72223	-2.80941	0.00626719	0.099931	-2.38083	4.60925	4.89171
APOBEC3C	All Targets	RNA	Endogenous	1	1	64	13	10.1762	1	1	27350	FALSE	-0.160974	5.14529	-0.502146	5.01801	-2.64045	0.00999269	0.123458	-2.78976	4.88868	5.212
MOSPD3	All Targets	RNA	Endogenous	1	1	56	10.5	8.46095	1	1	64598	FALSE	-0.602508	4.91965	-0.502083	4.76958	-2.78387	0.00673332	0.103631	-2.44833	4.67102	4.91741
GUCA2B	All Targets	RNA	Endogenous	1	1	34	10	7.04541	1	1	2981	FALSE	0.580969	4.7116	-0.501943	4.53524	-2.44033	0.0169363	0.156123	-3.2003	4.41396	4.71715
TEX47	All Targets	RNA	Endogenous	1	1	55	14	9.8218	1	1	219557	FALSE	-0.249457	5.10844	-0.501871	4.97809	-2.97694	0.00387405	0.0852865	-1.99871	4.90025	5.09486
MNDA	All Targets	RNA	Endogenous	1	1	47	12	8.72615	1	1	4332	FALSE	0.00417766	4.96226	-0.501762	4.80843	-2.58136	0.0117105	0.13161	-2.89972	4.70456	4.96422
LIMCH1	All Targets	RNA	Endogenous	1	1	33	13	9.71835	1	1	22998	FALSE	0.456549	5.09244	-0.501672	4.95022	-2.67103	0.00919663	0.118433	-2.71598	4.8914	5.03844
HUNK	All Targets	RNA	Endogenous	1	1	31	10.5	7.97911	1	1	30811	FALSE	-0.471621	4.84923	-0.501638	4.68774	-2.82589	0.00598241	0.0992631	-2.34939	4.64548	4.75114
LGR5	All Targets	RNA	Endogenous	1	1	56	13.5	10.6593	1	1	8549	FALSE	0.214364	5.20005	-0.501613	5.07026	-2.53298	0.0133715	0.139289	-3.04535	4.95084	5.24938
RANBP17	All Targets	RNA	Endogenous	1	1	34	14	9.88646	1	1	64901	FALSE	1.4104	5.11458	-0.501437	4.96027	-2.6031	0.0110498	0.129181	-2.86104	4.92533	5.0127
SIX4	All Targets	RNA	Endogenous	1	1	36	9	7.85831	1	1	51804	FALSE	0.0650881	4.83046	-0.501226	4.6602	-2.40945	0.0183275	0.160638	-3.25463	4.52239	4.86693
BLM	All Targets	RNA	Endogenous	1	1	32	8.5	7.50784	1	1	641	FALSE	0.130769	4.7714	-0.501198	4.6003	-2.60621	0.0109579	0.1288	-2.84991	4.5494	4.67666
CRHBP	All Targets	RNA	Endogenous	1	1	39	11	7.4323	1	1	1393	FALSE	0.682738	4.77856	-0.500822	4.59651	-2.4976	0.0146035	0.145857	-3.09442	4.51375	4.72066
OR2AJ1	All Targets	RNA	Endogenous	1	1	35	10.5	8.02024	1	1	127608	FALSE	-0.0758967	4.86745	-0.50077	4.70508	-2.59867	0.0111816	0.129631	-2.85859	4.57972	4.8931
RGL3	All Targets	RNA	Endogenous	1	1	56	14	12.6563	1	1	57139	FALSE	0.711661	5.40531	-0.500733	5.29303	-2.60001	0.0112326	0.129631	-2.91935	5.20257	5.42871
ZNF225	All Targets	RNA	Endogenous	1	1	30	9	7.16457	1	1	7768	FALSE	0.345536	4.71591	-0.500601	4.54195	-2.62691	0.0103647	0.126069	-2.80046	4.44776	4.68324
PIK3R6	All Targets	RNA	Endogenous	1	1	23	9.5	6.82054	1	1	146850	FALSE	0.47125	4.65887	-0.500536	4.47618	-2.59511	0.0112884	0.129705	-2.87086	4.47058	4.48458
IRF4	All Targets	RNA	Endogenous	1	1	30	11.5	8.1508	1	1	3662	FALSE	0.522151	4.87822	-0.500513	4.71723	-2.62631	0.0103816	0.126103	-2.81218	4.66424	4.79671
MTNR1B	All Targets	RNA	Endogenous	1	1	30	9	6.96886	1	1	4544	FALSE	-0.262647	4.68597	-0.500258	4.51044	-2.70131	0.00846549	0.114797	-2.63684	4.48683	4.54586
NAGPA	All Targets	RNA	Endogenous	1	1	26	8.5	6.4798	1	1	51172	FALSE	-0.478432	4.60829	-0.499915	4.41256	-2.34684	0.0214652	0.170701	-3.36631	4.25742	4.64527
RCL1	All Targets	RNA	Endogenous	1	1	42	12.5	9.63251	1	1	10171	FALSE	0.141785	5.07722	-0.499754	4.94225	-2.67821	0.0090182	0.117558	-2.70252	4.81273	5.13654
TLR8	All Targets	RNA	Endogenous	1	1	41	9.5	7.53332	1	1	51311	FALSE	1.1347	4.81058	-0.499645	4.62575	-2.51651	0.0138995	0.141866	-3.0414	4.48961	4.82995
RASGRP3	All Targets	RNA	Endogenous	1	1	39	11	10.0271	1	1	25780	FALSE	0.0439975	5.12303	-0.499559	4.97677	-2.34834	0.021801	0.172325	-3.43172	4.85363	5.16148
SEPTIN12	All Targets	RNA	Endogenous	1	1	55	13.5	9.22329	1	1	124404	FALSE	0.371642	5.03334	-0.499514	4.88758	-2.42869	0.0174493	0.157542	-3.23492	4.79695	5.02352
RNF212	All Targets	RNA	Endogenous	1	1	44	12	9.27304	1	1	285498	FALSE	-0.17895	5.04363	-0.499512	4.90076	-2.66251	0.00941229	0.119331	-2.73609	4.80207	5.04879
CEP290	All Targets	RNA	Endogenous	1	1	37	12	9.06336	1	1	80184	FALSE	0.201841	5.01026	-0.499246	4.86418	-2.7344	0.00772761	0.110572	-2.58223	4.78571	4.98189
NGB	All Targets	RNA	Endogenous	1	1	48	12	10.0791	1	1	58157	FALSE	-0.566294	5.13802	-0.499004	5.00892	-2.80753	0.00630044	0.0999646	-2.40439	4.91102	5.15577
HCG22	All Targets	RNA	Endogenous	1	1	22	7.5	6.00831	1	1	285834	FALSE	0.768818	4.51759	-0.498874	4.31765	-2.24274	0.0277999	0.191468	-3.58198	4.19197	4.50617
FAM47C	All Targets	RNA	Endogenous	1	1	40	13	8.50736	1	1	442444	FALSE	0.699413	4.93599	-0.498822	4.78306	-2.60931	0.0108671	0.1288	-2.85437	4.63152	5.01036
NAA38	All Targets	RNA	Endogenous	1	1	80	14.5	13.9324	1	1	84316	FALSE	0.122312	5.52562	-0.498804	5.41744	-2.79833	0.00646572	0.101119	-2.44195	5.32287	5.55928
GRIK2	All Targets	RNA	Endogenous	1	1	31	7.5	7.21114	1	1	2898	FALSE	0.261374	4.72677	-0.498747	4.54818	-2.60855	0.0108894	0.1288	-2.84687	4.44815	4.69824
ZNF488	All Targets	RNA	Endogenous	1	1	35	11.5	8.38273	1	1	118738	FALSE	0.0120691	4.90702	-0.498492	4.75753	-2.85859	0.0054521	0.0970639	-2.27591	4.703	4.83933
RNF144A	All Targets	RNA	Endogenous	1	1	81	15	13.552	1	1	9781	FALSE	0.151713	5.49409	-0.498403	5.39548	-2.79988	0.00643756	0.10099	-2.4435	5.22297	5.65424
LMX1A	All Targets	RNA	Endogenous	1	1	27	6	5.66211	1	1	4009	FALSE	0.294693	4.45538	-0.498192	4.22812	-2.218	0.0294572	0.196578	-3.61343	4.10534	4.41231
SYCP1	All Targets	RNA	Endogenous	1	1	32	10.5	6.9825	1	1	6847	FALSE	0.973137	4.69759	-0.498185	4.51685	-2.43467	0.0171839	0.157102	-3.22193	4.43449	4.6404
METTL1	All Targets	RNA	Endogenous	1	1	46	11.5	9.32576	1	1	4234	FALSE	-0.354477	5.03418	-0.498113	4.89278	-2.6428	0.00992921	0.12318	-2.77103	4.76089	5.09061
DONSON	All Targets	RNA	Endogenous	1	1	31	12	9.72363	1	1	29980	FALSE	-0.458166	5.07329	-0.49811	4.93787	-2.68526	0.00884623	0.117043	-2.68519	4.82036	5.11414
ZSCAN2	All Targets	RNA	Endogenous	1	1	29	10.5	8.13612	1	1	54993	FALSE	-0.0419746	4.86362	-0.498048	4.69479	-2.79982	0.00643857	0.10099	-2.4152	4.70525	4.6791
POTEA	All Targets	RNA	Endogenous	1	1	25	8	6.47148	1	1	340441	FALSE	-0.162067	4.58944	-0.498041	4.40366	-2.72958	0.0078312	0.111229	-2.55385	4.23305	4.65956
DNMT3L	All Targets	RNA	Endogenous	1	1	61	11	8.80133	1	1	29947	FALSE	0.484023	4.96934	-0.497987	4.82756	-2.42644	0.0175741	0.158181	-3.24755	4.74781	4.9472
LRIT2	All Targets	RNA	Endogenous	1	1	39	10.5	8.25522	1	1	340745	FALSE	0.284529	4.89036	-0.497927	4.73563	-2.49691	0.0146299	0.145903	-3.08371	4.55526	5.00618
TOM1	All Targets	RNA	Endogenous	1	2	63	17	15.0987	1	1	10043	FALSE	-0.700385	5.62835	-0.497894	5.53213	-3.09072	0.00276604	0.0748033	-1.73125	5.50723	5.56947
CASQ1	All Targets	RNA	Endogenous	1	1	37	11	7.50329	1	1	844	FALSE	-0.093562	4.77591	-0.49788	4.60462	-2.56923	0.0120945	0.133665	-2.9302	4.5167	4.7365
CYBB	All Targets	RNA	Endogenous	1	1	35	13	9.1636	1	1	1536	FALSE	0.0666497	5.02216	-0.497878	4.87702	-2.56377	0.0122713	0.134548	-2.94466	4.75585	5.05878
ANKRD26	All Targets	RNA	Endogenous	1	1	23	6	4.60073	1	1	22852	FALSE	-0.446718	4.22695	-0.497697	3.95148	-2.25421	0.0269821	0.189231	-3.52759	3.89699	4.03321
LMNB1	All Targets	RNA	Endogenous	1	2	61	13	12.7887	1	1	4001	FALSE	0.071493	5.41381	-0.497662	5.29887	-2.81312	0.00620207	0.099931	-2.41677	5.33095	5.25075
KIFC1	All Targets	RNA	Endogenous	1	1	34	12	10.4083	1	1	3833	FALSE	0.0990274	5.16636	-0.497478	5.0353	-2.49088	0.0149031	0.146905	-3.12955	4.92776	5.19661
MIEF1	All Targets	RNA	Endogenous	1	1	52	14	9.84496	1	1	54471	FALSE	0.646432	5.10201	-0.497308	4.97599	-2.61152	0.0108028	0.128467	-2.85661	4.7974	5.24388
HOATZ	All Targets	RNA	Endogenous	1	1	39	8.5	7.32764	1	1	399949	FALSE	-0.0157585	4.76111	-0.497204	4.57184	-2.33397	0.0222881	0.172759	-3.43271	4.51909	4.65097
SHOC1	All Targets	RNA	Endogenous	1	1	28	8.5	6.70063	1	1	158401	FALSE	0.533951	4.65148	-0.496747	4.46565	-2.39265	0.0191269	0.163165	-3.29459	4.33753	4.65783
SH3GL3	All Targets	RNA	Endogenous	1	1	44	11	8.02781	1	1	6457	FALSE	0.383683	4.84959	-0.496735	4.69432	-2.86467	0.00535838	0.0965579	-2.26889	4.64433	4.76932
OTOS	All Targets	RNA	Endogenous	1	1	38	9	8.24443	1	1	150677	FALSE	-0.0559556	4.88489	-0.496567	4.72936	-2.832	0.00587979	0.0988886	-2.3343	4.60905	4.90983
WDR64	All Targets	RNA	Endogenous	1	1	30	8	7.65872	1	1	128025	FALSE	0.297966	4.79465	-0.496519	4.62168	-2.29465	0.0244593	0.180893	-3.48845	4.52313	4.7695
AKAP6	All Targets	RNA	Endogenous	1	1	39	8.5	7.51226	1	1	9472	FALSE	-0.252658	4.79973	-0.49649	4.6207	-2.45051	0.0164987	0.153499	-3.17489	4.44259	4.88785
VAMP5	All Targets	RNA	Endogenous	1	1	40	15.5	12.0474	1	1	10791	FALSE	-0.1318	5.34751	-0.496382	5.23513	-2.75217	0.00735597	0.108243	-2.56419	5.1824	5.31422
MORN5	All Targets	RNA	Endogenous	1	1	34	13	8.35838	1	1	254956	FALSE	-0.280017	4.91543	-0.496136	4.76381	-2.85788	0.00546317	0.0970639	-2.26915	4.64093	4.94812
CD248	All Targets	RNA	Endogenous	1	1	34	10	8.11257	1	1	57124	FALSE	-0.244388	4.87463	-0.495898	4.71322	-2.596	0.0112616	0.129653	-2.85789	4.5909	4.89671
METAP1	All Targets	RNA	Endogenous	1	1	36	13	10.1825	1	1	23173	FALSE	0.545713	5.13469	-0.495883	5.00221	-2.5585	0.0124437	0.135462	-2.98188	4.87657	5.19067
TNFAIP8L1	All Targets	RNA	Endogenous	1	1	46	14	9.76607	1	1	126282	FALSE	-0.595532	5.09837	-0.495758	4.9669	-2.85665	0.00548232	0.0970639	-2.27887	4.78812	5.23508
PKIA	All Targets	RNA	Endogenous	1	1	48	14.5	10.9157	1	1	5569	FALSE	-0.369152	5.22365	-0.495703	5.10126	-2.62227	0.0104952	0.126547	-2.83117	4.90568	5.39463
ZKSCAN7	All Targets	RNA	Endogenous	1	1	49	14.5	8.56153	1	1	55888	FALSE	0.89697	4.95522	-0.495647	4.80481	-2.27783	0.0258941	0.186091	-3.55866	4.67537	4.99898
MAP3K1	All Targets	RNA	Endogenous	1	1	50	13	11.2665	1	1	4214	FALSE	0.384531	5.26885	-0.495581	5.13581	-2.65845	0.00952385	0.120076	-2.78254	5.07138	5.23246
CCDC187	All Targets	RNA	Endogenous	1	1	31	9.5	6.97675	1	1	399693	FALSE	-0.538546	4.69581	-0.495552	4.51454	-2.63446	0.0101559	0.124705	-2.76927	4.41115	4.66962
PGPEP1L	All Targets	RNA	Endogenous	1	1	26	11	7.02885	1	1	145814	FALSE	0.354993	4.70318	-0.495392	4.52311	-2.48333	0.0151562	0.148338	-3.11091	4.38113	4.73609
RASL12	All Targets	RNA	Endogenous	1	1	36	9	6.9181	1	1	51285	FALSE	0.541938	4.67533	-0.495279	4.4873	-2.39719	0.0189079	0.162515	-3.28333	4.30678	4.75807
MSX1	All Targets	RNA	Endogenous	1	1	55	10.5	8.444	1	1	4487	FALSE	0.480856	4.94343	-0.495278	4.77884	-2.4767	0.0154191	0.149131	-3.14693	4.74269	4.83306
MC4R	All Targets	RNA	Endogenous	1	1	35	12.5	8.41027	1	1	4160	FALSE	0.769991	4.93288	-0.495165	4.76901	-2.42016	0.0178415	0.159128	-3.25804	4.62151	4.99026
DHX8	All Targets	RNA	Endogenous	1	1	61	13.5	11.8048	1	1	1659	FALSE	-0.398135	5.3173	-0.49503	5.19965	-2.82037	0.00607645	0.0992631	-2.38853	5.13871	5.29108
RGS20	All Targets	RNA	Endogenous	1	1	52	10	7.29701	1	1	8601	FALSE	-0.154797	4.757	-0.494829	4.58107	-2.60019	0.0111361	0.129576	-2.85008	4.43969	4.79314
NAV3	All Targets	RNA	Endogenous	1	1	41	11	7.34299	1	1	89795	FALSE	0.316704	4.76109	-0.4948	4.59126	-2.63397	0.0101693	0.124785	-2.7782	4.45997	4.78819
WRN	All Targets	RNA	Endogenous	1	1	42	11.5	7.92855	1	1	7486	FALSE	0.0433887	4.84533	-0.49476	4.68302	-2.55894	0.0124293	0.135462	-2.94923	4.53685	4.90229
LRRC4C	All Targets	RNA	Endogenous	1	1	46	10	8.13423	1	1	57689	FALSE	0.191734	4.87642	-0.494597	4.71519	-2.59978	0.0111484	0.129576	-2.85063	4.5444	4.97138
HEPACAM2	All Targets	RNA	Endogenous	1	1	44	11.5	8.69468	1	1	253012	FALSE	0.152019	4.94919	-0.494543	4.80088	-2.71763	0.00809378	0.112668	-2.60974	4.74458	4.88533
E2F5	All Targets	RNA	Endogenous	1	1	43	12	8.90096	1	1	1875	FALSE	0.890419	4.97959	-0.494459	4.83267	-2.52718	0.0135156	0.13979	-3.04402	4.7499	4.95682
CHRM2	All Targets	RNA	Endogenous	1	1	37	8	7.23571	1	1	1129	FALSE	0.125587	4.73166	-0.494243	4.55557	-2.45708	0.0162215	0.152491	-3.15999	4.42296	4.75449
IMPG2	All Targets	RNA	Endogenous	1	1	39	10.5	8.36482	1	1	50939	FALSE	-0.173453	4.90298	-0.494214	4.75492	-2.73381	0.00774016	0.110572	-2.55922	4.59437	4.99575
GJD2	All Targets	RNA	Endogenous	1	1	39	10.5	7.37936	1	1	57369	FALSE	-0.354608	4.76574	-0.494137	4.59345	-2.58399	0.0116287	0.131017	-2.88313	4.46136	4.79159
NDUFAF4	All Targets	RNA	Endogenous	1	1	52	15	11.0934	1	1	29078	FALSE	-0.0359802	5.24103	-0.49406	5.12713	-2.74951	0.00741057	0.108706	-2.54943	5.054	5.23684
PHLDA3	All Targets	RNA	Endogenous	1	1	90	16.5	13.4454	1	1	23612	FALSE	-0.429991	5.48814	-0.494047	5.37855	-2.62242	0.010491	0.126547	-2.83922	5.18907	5.66279
STPG1	All Targets	RNA	Endogenous	1	1	45	12	8.45863	1	1	90529	FALSE	0.404312	4.9275	-0.494036	4.76921	-2.58261	0.0116717	0.131338	-2.9105	4.63599	4.96905
C6orf226	All Targets	RNA	Endogenous	1	1	45	14.5	9.83985	1	1	441150	FALSE	0.0934708	5.11625	-0.493928	4.97863	-2.51965	0.0137854	0.141124	-3.05939	4.87006	5.14149
TEX38	All Targets	RNA	Endogenous	1	1	33	11	8.46502	1	1	374973	FALSE	0.113441	4.91402	-0.493833	4.76667	-2.75276	0.00734394	0.108243	-2.52714	4.6929	4.87733
CD274	All Targets	RNA	Endogenous	1	1	38	11.5	8.90096	1	1	29126	FALSE	-0.233425	4.96649	-0.493676	4.82682	-2.71441	0.00816606	0.112762	-2.606	4.69863	5.01911
AMER1	All Targets	RNA	Endogenous	1	1	53	10.5	8.72479	1	1	139285	FALSE	0.323714	4.97069	-0.493613	4.81422	-2.49787	0.0145936	0.145839	-3.08514	4.67686	5.02027
UTP25	All Targets	RNA	Endogenous	1	1	33	9.5	7.76575	1	1	27042	FALSE	-0.920683	4.79973	-0.493461	4.63296	-2.54366	0.0129416	0.136915	-2.96752	4.45818	4.89513
B3GALT1	All Targets	RNA	Endogenous	1	1	38	14	9.66904	1	1	8708	FALSE	0.0766822	5.08303	-0.493441	4.95034	-2.70772	0.0083177	0.114095	-2.64174	4.85792	5.08897
ZSCAN22	All Targets	RNA	Endogenous	1	1	38	10.5	8.79688	1	1	342945	FALSE	0.516178	4.96587	-0.493145	4.81079	-2.24668	0.0278532	0.191468	-3.60975	4.72769	4.93544
ATP6V1C2	All Targets	RNA	Endogenous	1	1	32	9	7.23952	1	1	245973	FALSE	0.264424	4.73472	-0.49314	4.5626	-2.55284	0.0126317	0.136356	-2.96157	4.48649	4.67676
BARD1	All Targets	RNA	Endogenous	1	1	57	15	11.7557	1	1	580	FALSE	0.774544	5.32247	-0.492872	5.19644	-2.54628	0.0128527	0.136663	-2.99678	5.02584	5.45234
MPP7	All Targets	RNA	Endogenous	1	1	47	13	10.4805	1	1	143098	FALSE	-0.655358	5.16901	-0.492782	5.04042	-2.72092	0.00802065	0.112328	-2.6198	4.99725	5.10518
ZNF550	All Targets	RNA	Endogenous	1	1	36	10.5	9.24325	1	1	162972	FALSE	-0.0243423	5.01551	-0.492767	4.87871	-2.54062	0.0130458	0.137534	-3.00058	4.76181	5.05406
PECR	All Targets	RNA	Endogenous	1	1	37	14	10.6372	1	1	55825	FALSE	0.603653	5.18829	-0.492745	5.06383	-2.55249	0.0126587	0.136428	-3.00599	5.01994	5.12965
NUDCD1	All Targets	RNA	Endogenous	1	1	90	15.5	12.0408	1	1	84955	FALSE	0.307266	5.3419	-0.492636	5.22706	-2.49808	0.0147055	0.145986	-3.13406	5.08962	5.43321
TNFRSF19	All Targets	RNA	Endogenous	1	1	46	16	11.425	1	1	55504	FALSE	0.189924	5.27599	-0.492536	5.15516	-2.46097	0.01613	0.152331	-3.19661	4.97864	5.41993
CCDC163	All Targets	RNA	Endogenous	1	1	25	9.5	7.85126	1	1	126661	FALSE	0.361719	4.83071	-0.492188	4.66713	-2.40122	0.0187151	0.161677	-3.28627	4.53731	4.86186
SYT9	All Targets	RNA	Endogenous	1	1	49	10.5	7.45484	1	1	143425	FALSE	-0.0161241	4.78761	-0.492015	4.61	-2.36567	0.0204752	0.168354	-3.34906	4.41293	4.90562
NABP1	All Targets	RNA	Endogenous	1	1	57	15	14.2503	1	1	64859	FALSE	0.207726	5.55961	-0.491996	5.45838	-3.00951	0.00352087	0.0817367	-1.94511	5.45826	5.45857
ZSWIM2	All Targets	RNA	Endogenous	1	1	43	12	8.40476	1	1	151112	FALSE	-0.646189	4.90967	-0.491965	4.76224	-2.82654	0.00597149	0.0992066	-2.34753	4.67086	4.89931
CCDC166	All Targets	RNA	Endogenous	1	1	38	10.5	8.51623	1	1	100130274	FALSE	0.615676	4.94838	-0.491956	4.79148	-2.56307	0.0122938	0.134642	-2.96365	4.71337	4.90864
OR1S1	All Targets	RNA	Endogenous	1	1	42	13	8.11809	1	1	219959	FALSE	0.0627637	4.88974	-0.491787	4.72938	-2.59741	0.0112191	0.129631	-2.86945	4.60307	4.91883
MRPL45	All Targets	RNA	Endogenous	1	1	38	14.5	10.7681	1	1	84311	FALSE	-0.289585	5.19797	-0.491776	5.07772	-2.93151	0.0044217	0.0903268	-2.11543	4.99579	5.20061
OR1K1	All Targets	RNA	Endogenous	1	1	35	8.5	7.08915	1	1	392392	FALSE	0.206625	4.71964	-0.49135	4.53512	-2.4589	0.0161457	0.1524	-3.16061	4.42736	4.69675
SYT11	All Targets	RNA	Endogenous	1	1	44	12.5	9.67393	1	1	23208	FALSE	-0.0424378	5.08068	-0.491265	4.93857	-2.63152	0.0102366	0.12527	-2.80773	4.90708	4.9858
PAEP	All Targets	RNA	Endogenous	1	1	35	11	7.66553	1	1	5047	FALSE	0.336038	4.81703	-0.491218	4.63971	-2.3929	0.0191144	0.163165	-3.29503	4.52523	4.81143
SNCAIP	All Targets	RNA	Endogenous	1	1	50	13	9.79461	1	1	9627	FALSE	0.278828	5.11216	-0.49111	4.95745	-2.27165	0.0259421	0.186357	-3.54405	4.74435	5.27709
LST1	All Targets	RNA	Endogenous	1	1	39	11.5	9.60403	1	1	7940	FALSE	0.0301561	5.07359	-0.490967	4.92504	-2.47768	0.0153802	0.148995	-3.14948	4.8163	5.08816
COL4A1	All Targets	RNA	Endogenous	1	3	56	15	14.2076	1	1	1282	FALSE	0.419423	5.54761	-0.490644	5.44203	-2.45591	0.0163788	0.153294	-3.21437	5.24168	5.74256
CRMP1	All Targets	RNA	Endogenous	1	1	49	12	9.24256	1	1	1400	FALSE	-0.766284	5.02259	-0.490587	4.87937	-2.88342	0.00507875	0.0947216	-2.21611	4.79435	5.00691
GUCY2D	All Targets	RNA	Endogenous	1	1	28	10	6.75203	1	1	3000	FALSE	0.820311	4.66325	-0.490283	4.47284	-2.34341	0.0216501	0.171584	-3.40239	4.4054	4.57399
SLCO5A1	All Targets	RNA	Endogenous	1	1	44	9.5	7.14882	1	1	81796	FALSE	-0.159997	4.72504	-0.490108	4.55021	-2.53452	0.0132574	0.13871	-2.99636	4.43833	4.71804
CXCR5	All Targets	RNA	Endogenous	1	1	26	10.5	7.07124	1	1	643	FALSE	-0.411493	4.70983	-0.490081	4.53211	-2.63046	0.0102659	0.125293	-2.79858	4.52596	4.54134
KRT33B	All Targets	RNA	Endogenous	1	1	45	8	7.16326	1	1	3884	FALSE	-0.0559095	4.72137	-0.490056	4.53329	-2.45047	0.0165004	0.153499	-3.18216	4.52229	4.54978
HNRNPCL1	All Targets	RNA	Endogenous	1	1	31	8	6.3927	1	1	343069	FALSE	0.603416	4.59506	-0.489956	4.39493	-2.23953	0.0280265	0.191834	-3.59842	4.30336	4.53229
CD1C	All Targets	RNA	Endogenous	1	1	34	10	7.1956	1	1	911	FALSE	0.0668313	4.73098	-0.489907	4.54518	-2.40959	0.0183213	0.160638	-3.25235	4.38297	4.78849
ISM1	All Targets	RNA	Endogenous	1	1	41	13.5	9.95324	1	1	140862	FALSE	-0.0472915	5.1195	-0.489728	4.98298	-2.82922	0.00592633	0.0991548	-2.3543	4.89913	5.10876
OR10H5	All Targets	RNA	Endogenous	1	1	72	12.5	9.11839	1	1	284433	FALSE	0.480586	5.0088	-0.489681	4.86352	-2.2773	0.0258903	0.186091	-3.56314	4.739	5.05029
POLR1C	All Targets	RNA	Endogenous	1	1	58	12	9.72548	1	1	9533	FALSE	0.36043	5.09012	-0.489519	4.94707	-2.37929	0.0199025	0.166513	-3.36012	4.89688	5.02235
AHSA1	All Targets	RNA	Endogenous	1	1	45	13	10.8029	1	1	10598	FALSE	0.643585	5.20827	-0.489392	5.08688	-2.69863	0.00852804	0.11495	-2.68295	4.98532	5.2392
INTS5	All Targets	RNA	Endogenous	1	1	38	11	10.4664	1	1	80789	FALSE	-0.0639215	5.16275	-0.489355	5.04073	-2.5475	0.0128113	0.136663	-3.00487	4.94728	5.1809
DGKG	All Targets	RNA	Endogenous	1	1	35	13	8.24877	1	1	1608	FALSE	0.413128	4.89834	-0.489236	4.74761	-2.55871	0.0124368	0.135462	-2.95729	4.62036	4.93849
KRT26	All Targets	RNA	Endogenous	1	1	36	8.5	8.4087	1	1	353288	FALSE	0.000659097	4.90741	-0.488983	4.75007	-2.41686	0.0179846	0.159649	-3.25352	4.62948	4.93095
PDE6A	All Targets	RNA	Endogenous	1	1	44	11	8.96297	1	1	5145	FALSE	0.196477	4.99885	-0.488861	4.85266	-2.60669	0.0109439	0.1288	-2.86765	4.73596	5.0277
ZSWIM1	All Targets	RNA	Endogenous	1	1	49	13	10.8658	1	1	90204	FALSE	-0.216352	5.21494	-0.488825	5.09135	-2.7428	0.00754972	0.109471	-2.56232	4.97596	5.26443
COL9A3	All Targets	RNA	Endogenous	1	1	26	7.5	6.29618	1	1	1299	FALSE	-0.205785	4.58546	-0.48856	4.38649	-2.53967	0.0130786	0.137718	-2.97404	4.27625	4.55184
MEPE	All Targets	RNA	Endogenous	1	1	37	10.5	7.50589	1	1	56955	FALSE	0.0602815	4.78201	-0.488533	4.61406	-2.56989	0.0120734	0.133525	-2.92327	4.47813	4.81796
ZSCAN29	All Targets	RNA	Endogenous	1	1	41	13	11.76	1	1	146050	FALSE	-0.0334618	5.30908	-0.488483	5.19304	-2.58229	0.0116815	0.131366	-2.92528	5.0763	5.36815
IL1RN	All Targets	RNA	Endogenous	1	2	141	17.5	16.0585	1	1	3557	FALSE	1.39004	5.71374	-0.488359	5.62212	-2.54296	0.0130625	0.137629	-3.04789	5.49677	5.81015
OR4X1	All Targets	RNA	Endogenous	1	1	54	13	9.7473	1	1	390113	FALSE	-0.244806	5.08138	-0.488313	4.94737	-2.70143	0.0084627	0.114797	-2.65023	4.85695	5.083
GC	All Targets	RNA	Endogenous	1	1	57	13	8.58254	1	1	2638	FALSE	0.0636861	4.97052	-0.488156	4.80816	-2.42939	0.0174178	0.157542	-3.24142	4.71294	4.95099
DHRS7C	All Targets	RNA	Endogenous	1	1	46	9	6.87985	1	1	201140	FALSE	0.0806997	4.70501	-0.487721	4.5013	-2.57836	0.0118045	0.131886	-2.90781	4.44081	4.59203
ITPRID1	All Targets	RNA	Endogenous	1	1	40	13	9.19163	1	1	223075	FALSE	-0.296965	5.02782	-0.487366	4.89029	-2.80824	0.00628793	0.099931	-2.39976	4.77751	5.05947
ZBP1	All Targets	RNA	Endogenous	1	1	25	8	6.74132	1	1	81030	FALSE	0.502698	4.64912	-0.487322	4.46179	-2.33131	0.0223155	0.172759	-3.429	4.37038	4.5989
LRRC53	All Targets	RNA	Endogenous	1	1	38	13	8.8769	1	1	105378803	FALSE	0.156228	4.98062	-0.487266	4.83761	-2.63045	0.0102663	0.125293	-2.80359	4.72825	5.00164
STARD8	All Targets	RNA	Endogenous	1	1	87	10	7.40227	1	1	9754	FALSE	0.30377	4.77583	-0.48715	4.59973	-2.3543	0.0210681	0.170307	-3.36631	4.44073	4.83823
IQCM	All Targets	RNA	Endogenous	1	1	31	9	8.76037	1	1	285423	FALSE	0.383387	4.96096	-0.487047	4.79665	-2.26785	0.0264436	0.187496	-3.57906	4.68258	4.96775
POGLUT1	All Targets	RNA	Endogenous	1	1	37	10.5	8.90236	1	1	56983	FALSE	-0.330118	4.97235	-0.487032	4.82614	-2.47436	0.0155132	0.149305	-3.14224	4.69612	5.02117
SLC51B	All Targets	RNA	Endogenous	1	1	27	11	7.38771	1	1	123264	FALSE	-0.567509	4.7543	-0.486896	4.58511	-2.71995	0.00804227	0.112368	-2.58563	4.45948	4.77357
MID2	All Targets	RNA	Endogenous	1	1	36	10	8.28038	1	1	11043	FALSE	-0.212973	4.89039	-0.486884	4.72113	-2.3818	0.019659	0.165783	-3.32091	4.59602	4.90879
MINDY4	All Targets	RNA	Endogenous	1	1	38	12.5	9.26639	1	1	84182	FALSE	0.609448	5.03349	-0.486775	4.89883	-2.38682	0.0194148	0.164778	-3.32894	4.75058	5.12122
ACBD7	All Targets	RNA	Endogenous	1	1	32	9.5	8.41571	1	1	414149	FALSE	-0.14897	4.92043	-0.486708	4.76458	-2.63855	0.0100441	0.123923	-2.77396	4.61247	4.99274
C9orf131	All Targets	RNA	Endogenous	1	1	36	13	8.81004	1	1	138724	FALSE	0.075194	4.96883	-0.486598	4.81735	-2.61646	0.0106605	0.127384	-2.83305	4.75503	4.91084
PRNP	All Targets	RNA	Endogenous	1	2	116	17.5	16.1497	1	1	5621	FALSE	1.35042	5.71789	-0.486557	5.62916	-2.6702	0.00921728	0.118433	-2.75106	5.37832	6.00542
NLRP9	All Targets	RNA	Endogenous	1	1	32	8.5	6.89714	1	1	338321	FALSE	0.463707	4.68336	-0.486298	4.49814	-2.21964	0.0294465	0.196578	-3.6403	4.35123	4.71851
SLC4A4	All Targets	RNA	Endogenous	1	1	210	26.5	19.1308	1	1	8671	FALSE	0.518535	5.94388	-0.486271	5.8682	-2.3672	0.0212362	0.170471	-3.44967	5.72914	6.07679
AQP11	All Targets	RNA	Endogenous	1	1	32	9.5	7.57197	1	1	282679	FALSE	0.917569	4.79506	-0.486098	4.62156	-2.53681	0.0131776	0.138277	-3.00358	4.49228	4.81549
SNX24	All Targets	RNA	Endogenous	1	1	49	12	9.40439	1	1	28966	FALSE	-0.169809	5.05362	-0.486062	4.91087	-2.62666	0.0103718	0.126069	-2.80982	4.79068	5.09116
CYP46A1	All Targets	RNA	Endogenous	1	1	43	9	7.09804	1	1	10858	FALSE	-0.405363	4.71716	-0.486049	4.53605	-2.47837	0.0153526	0.148968	-3.11182	4.38549	4.76189
MAPK10	All Targets	RNA	Endogenous	1	1	47	13	9.27917	1	1	5602	FALSE	-0.129505	5.02275	-0.485975	4.88771	-2.79839	0.00646455	0.101119	-2.42139	4.77314	5.05957
PACRG	All Targets	RNA	Endogenous	1	1	38	11	7.87391	1	1	135138	FALSE	-0.704428	4.83548	-0.485942	4.6745	-2.56392	0.0122664	0.134548	-2.94131	4.60534	4.77826
MARVELD1	All Targets	RNA	Endogenous	1	2	53	12.5	12.6551	1	1	83742	FALSE	-0.691421	5.39365	-0.485685	5.28395	-2.87834	0.00515315	0.0951408	-2.24631	5.14275	5.49575
KCP	All Targets	RNA	Endogenous	1	1	40	12.5	10.6499	1	1	375616	FALSE	0.27671	5.19394	-0.48531	5.06615	-2.35696	0.0210224	0.17023	-3.4014	4.83156	5.41805
TBC1D2	All Targets	RNA	Endogenous	1	1	60	20.5	14.2865	1	1	55357	FALSE	0.10806	5.56153	-0.485028	5.46983	-2.76159	0.00716552	0.107174	-2.54006	5.32193	5.69168
RAP1GAP2	All Targets	RNA	Endogenous	1	4	57	17	16.7921	1	1	23108	FALSE	-0.7134	5.75688	0.484574	5.66825	2.94385	0.00426626	0.0886201	-2.09481	5.76859	5.51773
LRRC52	All Targets	RNA	Endogenous	1	1	46	11.5	9.10206	1	1	440699	FALSE	0.0576461	5.0086	0.48559	4.85356	2.58836	0.0114939	0.130597	-2.88288	5.04475	4.56677
ACSL5	All Targets	RNA	Endogenous	1	6	101	27.5	25.8843	1	1	51703	FALSE	-0.308945	6.33376	0.486863	6.27573	3.01192	0.00349595	0.0812627	-1.96164	6.37224	6.13096
UBE4B	All Targets	RNA	Endogenous	1	3	51	22	16.9144	1	1	10277	FALSE	-0.386299	5.76904	0.487246	5.68152	2.99681	0.00365489	0.0830002	-1.97463	5.82783	5.46206
RGS18	All Targets	RNA	Endogenous	1	1	109	21.5	16.8086	1	1	64407	FALSE	1.05904	5.78714	0.487745	5.69935	2.67156	0.00918332	0.118433	-2.73839	5.78738	5.5673
USP48	All Targets	RNA	Endogenous	1	1	73	20	16.0862	1	1	84196	FALSE	-0.0206687	5.71144	0.488977	5.62368	2.62128	0.0105434	0.126635	-2.8718	5.762	5.4162
GOLGA3	All Targets	RNA	Endogenous	1	2	69	18	15.953	1	1	2802	FALSE	-0.707756	5.69104	0.489565	5.60209	2.85624	0.0054887	0.0970639	-2.2906	5.65322	5.52538
CAPN15	All Targets	RNA	Endogenous	1	3	64	22	20.6064	1	1	6650	FALSE	-0.167936	6.0319	0.489914	5.95517	2.91162	0.00468333	0.0922555	-2.20427	6.1214	5.70584
ACIN1	All Targets	RNA	Endogenous	1	3	64	17.5	16.0429	1	1	22985	FALSE	-0.10563	5.69929	0.48996	5.60741	2.77888	0.00682791	0.104537	-2.49986	5.74652	5.39875
PLEKHA4	All Targets	RNA	Endogenous	1	7	267	34	40.4626	1	1	57664	FALSE	1.32823	6.95776	0.490022	6.90931	2.84266	0.00572525	0.0979811	-2.3926	7.10098	6.6218
CASP10	All Targets	RNA	Endogenous	1	4	94	21	20.2122	1	1	843	FALSE	0.550484	6.00901	0.490165	5.92847	2.66869	0.00929319	0.118953	-2.77767	6.05206	5.74309
MLPH	All Targets	RNA	Endogenous	1	14	191	44	43.5743	1	1	79083	FALSE	0.0777608	7.05011	0.490224	7.01216	3.19482	0.00201851	0.0659596	-1.53277	7.15555	6.79707
ZNF891	All Targets	RNA	Endogenous	1	1	31	8.5	6.7384	1	1	101060200	FALSE	0.552951	4.64107	0.490513	4.45391	2.26308	0.0264045	0.18732	-3.5365	4.54463	4.31782
SLC2A13	All Targets	RNA	Endogenous	1	1	53	14	11.1418	1	1	114134	FALSE	-0.396609	5.2415	0.490539	5.1208	2.58444	0.0116149	0.130943	-2.90391	5.25961	4.91259
TRIM66	All Targets	RNA	Endogenous	1	2	81	23	20.0626	1	1	9866	FALSE	0.480971	5.99993	0.49072	5.92323	2.74683	0.00746575	0.109105	-2.5624	6.00485	5.8008
GULP1	All Targets	RNA	Endogenous	1	1	57	16	14.033	1	1	51454	FALSE	0.141331	5.5279	0.490942	5.43435	2.83854	0.0057718	0.0982548	-2.33544	5.48159	5.36349
RAB11A	All Targets	RNA	Endogenous	1	6	142	33.5	30.138	1	1	8766	FALSE	0.668181	6.54917	0.491406	6.49362	2.95603	0.00413478	0.0875565	-2.1296	6.64183	6.2713
SYTL4	All Targets	RNA	Endogenous	1	1	57	10.5	11.6948	1	1	94121	FALSE	0.190024	5.30806	0.491678	5.17669	2.58907	0.0114722	0.130477	-2.9095	5.28893	5.00832
ZNF326	All Targets	RNA	Endogenous	1	1	44	15	13.5251	1	1	284695	FALSE	0.18267	5.48416	0.492158	5.37788	2.72283	0.00797852	0.112172	-2.62289	5.57	5.08969
GIPR	All Targets	RNA	Endogenous	1	1	50	16	13.6864	1	1	2696	FALSE	-0.375337	5.49584	0.492419	5.39616	2.8937	0.00493113	0.0938028	-2.20251	5.46269	5.29636
HIP1R	All Targets	RNA	Endogenous	1	1	79	16	11.5538	1	1	9026	FALSE	-0.381848	5.29727	0.492519	5.1788	2.61715	0.0106408	0.127384	-2.82803	5.26894	5.04359
TM4SF1	All Targets	RNA	Endogenous	1	16	496	49	56.7181	1	1	4071	FALSE	1.88343	7.42117	0.494511	7.38944	2.41296	0.0207266	0.169094	-3.51851	7.53201	7.17558
INPP4B	All Targets	RNA	Endogenous	1	1	72	18	16.6187	1	1	8821	FALSE	0.523826	5.75366	0.494705	5.66549	2.72163	0.00800504	0.112328	-2.63355	5.72405	5.57764
MOGS	All Targets	RNA	Endogenous	1	1	51	14	12.0741	1	1	7841	FALSE	0.223511	5.35306	0.49488	5.23113	2.48865	0.014948	0.146905	-3.11921	5.30285	5.12355
GPA33	All Targets	RNA	Endogenous	1	2	57	14	12.2986	1	1	10223	FALSE	0.541796	5.36761	0.495838	5.2433	2.38013	0.0201077	0.167221	-3.37506	5.43628	4.95382
SLC17A5	All Targets	RNA	Endogenous	1	4	78	19	17.6267	1	1	26503	FALSE	-0.814333	5.82199	0.495885	5.73875	3.21099	0.00192049	0.0652388	-1.42127	5.92729	5.45594
ONECUT3	All Targets	RNA	Endogenous	1	1	53	12	10.1245	1	1	390874	FALSE	0.875235	5.1348	0.49659	5.00614	2.35158	0.0213345	0.170701	-3.4022	5.13337	4.8153
DDX60L	All Targets	RNA	Endogenous	1	2	28	13	10.9532	1	1	91351	FALSE	0.131266	5.21475	0.49692	5.0792	2.50835	0.0141994	0.143408	-3.07604	5.17692	4.93263
TRAPPC6B	All Targets	RNA	Endogenous	1	1	53	14.5	11.7347	1	1	122553	FALSE	0.0628562	5.31033	0.497507	5.18987	2.43609	0.0171214	0.156973	-3.20894	5.22165	5.14221
KPNB1	All Targets	RNA	Endogenous	1	4	128	28	24.9358	1	1	3837	FALSE	1.18932	6.29125	0.500021	6.22462	2.89749	0.00487776	0.0938007	-2.21652	6.3315	6.06431
PELI1	All Targets	RNA	Endogenous	1	5	54	18	18.3671	1	1	57162	FALSE	0.206538	5.88306	0.500829	5.79295	2.88352	0.00507728	0.0947216	-2.26666	5.94571	5.56381
YWHAZ	All Targets	RNA	Endogenous	1	34	812	136.5	134.854	1	1	7534	FALSE	1.94018	8.64322	0.502136	8.62909	3.76265	0.000323286	0.0320408	0.0679463	8.79432	8.38124
CLMN	All Targets	RNA	Endogenous	1	3	72	20	19.5162	1	1	79789	FALSE	0.00178007	5.95693	0.502355	5.88086	3.10487	0.00265103	0.0736142	-1.71256	6.03452	5.65037
EXOSC3	All Targets	RNA	Endogenous	1	3	70	25	21.5086	1	1	51010	FALSE	-0.220896	6.08725	0.502867	6.01918	3.00068	0.00361356	0.0825005	-1.97778	6.14945	5.82377
SIM2	All Targets	RNA	Endogenous	1	2	36	14	12.607	1	1	6493	FALSE	-0.0871473	5.39156	0.503214	5.27741	2.82394	0.00601543	0.0992631	-2.36369	5.35081	5.16732
MAML1	All Targets	RNA	Endogenous	1	1	51	14	12.7815	1	1	9794	FALSE	0.231545	5.40932	0.504053	5.30213	2.72337	0.00796668	0.112111	-2.60913	5.35264	5.22636
DGKQ	All Targets	RNA	Endogenous	1	2	59	24	19.2979	1	1	1609	FALSE	0.124775	5.9448	0.504098	5.8685	3.04582	0.00316243	0.0782496	-1.85438	5.97687	5.70594
SC5D	All Targets	RNA	Endogenous	1	1	67	21	16.2969	1	1	6309	FALSE	0.260783	5.73357	0.504103	5.65062	2.87719	0.00517017	0.0952302	-2.23901	5.61671	5.70149
GNA12	All Targets	RNA	Endogenous	1	3	62	18	14.6329	1	1	2768	FALSE	-0.386042	5.58206	0.504343	5.48101	2.95369	0.00414599	0.0875565	-2.04858	5.52803	5.41048
TNFRSF10B	All Targets	RNA	Endogenous	1	8	116	27	28.4566	1	1	8795	FALSE	-0.33939	6.47379	0.505245	6.40849	3.26995	0.00160083	0.0600941	-1.28668	6.5948	6.12903
FOXL1	All Targets	RNA	Endogenous	1	1	62	12	10.5451	1	1	2300	FALSE	0.824061	5.19228	0.505992	5.05866	2.37826	0.0199358	0.166714	-3.34131	5.14702	4.92613
GRIP1	All Targets	RNA	Endogenous	1	1	28	8	8.24491	1	1	23426	FALSE	0.134317	4.88748	0.506105	4.71969	2.42439	0.0176421	0.158244	-3.2181	4.75223	4.67089
TEAD4	All Targets	RNA	Endogenous	1	1	44	13	12.568	1	1	7004	FALSE	-0.589677	5.38589	0.506284	5.27899	2.97194	0.00393117	0.0853556	-2.01111	5.38706	5.11689
SPIRE2	All Targets	RNA	Endogenous	1	3	69	17	17.0587	1	1	84501	FALSE	0.0593996	5.78233	0.506636	5.69571	2.68252	0.0090002	0.117558	-2.74236	5.82174	5.50665
KBTBD12	All Targets	RNA	Endogenous	1	4	43	12	11.983	1	1	166348	FALSE	-0.476608	5.32332	0.506657	5.20109	2.80853	0.00628278	0.099931	-2.39621	5.36088	4.96139
ABHD17C	All Targets	RNA	Endogenous	1	5	155	31.5	33.3649	1	1	58489	FALSE	-0.294136	6.68112	0.506805	6.63518	3.34733	0.00125666	0.0559696	-1.0888	6.76776	6.43631
MARCHF6	All Targets	RNA	Endogenous	1	6	187	35.5	34.7319	1	1	10299	FALSE	-0.791458	6.73862	0.508821	6.69281	3.52631	0.00070835	0.0437576	-0.577597	6.79638	6.53747
SIGMAR1	All Targets	RNA	Endogenous	1	13	142	48	46.0393	1	1	10280	FALSE	-0.325958	7.12532	0.50897	7.09096	3.65772	0.000459686	0.0359104	-0.195891	7.17648	6.96267
CANT1	All Targets	RNA	Endogenous	1	6	131	25.5	26.2567	1	1	124583	FALSE	0.288734	6.35734	0.509549	6.29569	3.19593	0.00201128	0.0659596	-1.47448	6.49404	5.99816
SLC6A8	All Targets	RNA	Endogenous	1	3	113	19.5	19.1288	1	1	6535	FALSE	0.129535	5.9365	0.509827	5.85353	2.93772	0.00434291	0.0895285	-2.12906	5.93443	5.73218
MAPKAPK2	All Targets	RNA	Endogenous	1	12	145	34.5	34.3275	1	1	9261	FALSE	0.464643	6.72417	0.510228	6.67243	3.12908	0.00247123	0.0716537	-1.68409	6.87152	6.3738
GSDMB	All Targets	RNA	Endogenous	1	5	198	24	25.3043	1	1	55876	FALSE	0.2744	6.30732	0.510909	6.24535	3.01969	0.00341671	0.0805904	-1.93187	6.43854	5.95555
PARM1	All Targets	RNA	Endogenous	1	1	86	23.5	17.3543	1	1	25849	FALSE	-0.463553	5.80822	0.511331	5.73115	2.92912	0.00445246	0.0903415	-2.15	5.86741	5.52677
PFKL	All Targets	RNA	Endogenous	1	3	73	22	20.6044	1	1	5211	FALSE	-1.16121	6.02658	0.511721	5.95718	3.26898	0.0016057	0.0600941	-1.26575	6.07358	5.78257
SRC	All Targets	RNA	Endogenous	1	5	194	31	30.5867	1	1	6714	FALSE	-0.214851	6.56199	0.512359	6.5118	3.38083	0.00113039	0.0540733	-0.982074	6.62076	6.34835
ANKLE2	All Targets	RNA	Endogenous	1	8	140	35.5	36.5375	1	1	23141	FALSE	1.2246	6.81173	0.512646	6.763	2.37567	0.0225231	0.173307	-3.54744	6.91463	6.53556
CLDN4	All Targets	RNA	Endogenous	1	16	443	79.5	82.3556	1	1	1364	FALSE	1.73911	7.94777	0.513657	7.92231	2.74671	0.00893964	0.117406	-2.8331	8.08519	7.67798
MARCHF3	All Targets	RNA	Endogenous	1	1	51	19.5	13.6258	1	1	115123	FALSE	0.876404	5.50422	0.514751	5.40846	2.84164	0.00572137	0.0979811	-2.32775	5.41559	5.39776
CSNK2B	All Targets	RNA	Endogenous	1	7	105	24	24.1942	1	1	1460	FALSE	0.345733	6.24528	0.515134	6.17853	3.27473	0.00157723	0.0598504	-1.25563	6.33799	5.93934
SLC19A2	All Targets	RNA	Endogenous	1	1	48	12.5	11.1342	1	1	10560	FALSE	-0.699414	5.24526	0.515765	5.12224	2.59226	0.0113749	0.130158	-2.88296	5.25763	4.91915
FAM126B	All Targets	RNA	Endogenous	1	2	63	16.5	16.0089	1	1	285172	FALSE	-0.681847	5.69701	0.516063	5.60617	3.00503	0.00356757	0.0822913	-1.92999	5.7016	5.46301
PRRC2C	All Targets	RNA	Endogenous	1	8	97	23.5	23.781	1	1	23215	FALSE	0.0799288	6.22741	0.516146	6.15486	3.30956	0.00141488	0.0576109	-1.16315	6.31529	5.9142
TAF1D	All Targets	RNA	Endogenous	1	9	125	37.5	34.3495	1	1	79101	FALSE	-0.231353	6.7221	0.516861	6.67468	3.40006	0.00106341	0.0521259	-0.916824	6.79159	6.49931
RALGAPA2	All Targets	RNA	Endogenous	1	2	59	19.5	16.8971	1	1	57186	FALSE	0.628303	5.7729	0.516906	5.68248	2.51427	0.0147007	0.145986	-3.14106	5.79653	5.5114
PDZD8	All Targets	RNA	Endogenous	1	15	117	32	33.0993	1	1	118987	FALSE	0.0888055	6.67255	0.516987	6.62103	3.56358	0.00062721	0.0414418	-0.451283	6.77337	6.39253
TAF15	All Targets	RNA	Endogenous	1	6	104	38.5	32.3036	1	1	8148	FALSE	0.922578	6.64038	0.517075	6.58968	3.02952	0.0033189	0.0800351	-1.90451	6.66914	6.47049
NPNT	All Targets	RNA	Endogenous	1	2	63	20	17.4699	1	1	255743	FALSE	-0.703683	5.81483	0.517101	5.72936	3.06014	0.00303061	0.0769537	-1.80492	5.87416	5.51215
SPG7	All Targets	RNA	Endogenous	1	3	98	27	26.2795	1	1	6687	FALSE	-0.764782	6.3583	0.517908	6.2989	3.32417	0.00135161	0.0569767	-1.12669	6.39727	6.15136
LDHA	All Targets	RNA	Endogenous	1	21	359	74.5	77.0886	1	1	3939	FALSE	2.15268	7.85226	0.518372	7.82808	3.67315	0.000436668	0.0347056	-0.175377	7.95183	7.64245
SUN1	All Targets	RNA	Endogenous	1	4	72	14.5	16.9442	1	1	23353	FALSE	0.207646	5.7736	0.518698	5.68697	3.07202	0.00292515	0.0759193	-1.75229	5.69409	5.67627
IST1	All Targets	RNA	Endogenous	1	3	90	18.5	20.5388	1	1	9798	FALSE	0.0542578	6.03118	0.519	5.95371	3.26341	0.00163368	0.0607594	-1.28215	6.11443	5.71264
TIMM50	All Targets	RNA	Endogenous	1	1	55	16.5	12.4394	1	1	92609	FALSE	-0.442311	5.37749	0.519267	5.26504	2.89471	0.00491684	0.0938028	-2.19053	5.41128	5.04569
USP34	All Targets	RNA	Endogenous	1	5	108	23	20.6558	1	1	9736	FALSE	-0.208326	6.03097	0.519352	5.95885	3.22326	0.0018494	0.0641529	-1.37594	6.02957	5.85277
TCF7L2	All Targets	RNA	Endogenous	1	7	233	43.5	41.9008	1	1	6934	FALSE	0.0781294	7.00353	0.519634	6.95982	3.62871	0.000506156	0.0374182	-0.28786	7.1077	6.73801
SAFB2	All Targets	RNA	Endogenous	1	1	59	18	12.9025	1	1	9667	FALSE	0.661377	5.43941	0.519807	5.33082	2.76172	0.00716303	0.107174	-2.49582	5.32864	5.33409
RARS2	All Targets	RNA	Endogenous	1	1	95	14.5	14.2903	1	1	57038	FALSE	0.105176	5.55781	0.520319	5.46605	3.07632	0.00288778	0.075551	-1.74694	5.58841	5.28253
PPP2R5A	All Targets	RNA	Endogenous	1	2	133	30.5	24.7569	1	1	5525	FALSE	0.959033	6.28511	0.520336	6.21895	2.70436	0.00900584	0.117558	-2.76381	6.4198	5.91769
GJC3	All Targets	RNA	Endogenous	1	3	74	20.5	21.1972	1	1	349149	FALSE	-0.773935	6.06718	0.520855	5.99679	3.44038	0.000934922	0.0487339	-0.788981	6.08263	5.86803
CGN	All Targets	RNA	Endogenous	1	5	164	27.5	30.2827	1	1	57530	FALSE	0.182166	6.54959	0.521569	6.49771	3.32101	0.00136506	0.0569767	-1.15176	6.63692	6.2889
ATG4D	All Targets	RNA	Endogenous	1	1	55	14.5	12.3436	1	1	84971	FALSE	0.546845	5.37386	0.522376	5.26318	2.85489	0.00550993	0.0972486	-2.30742	5.39689	5.06261
PRPF4	All Targets	RNA	Endogenous	1	2	35	13.5	10.9902	1	1	9128	FALSE	-0.474778	5.21969	0.522657	5.0903	2.8467	0.0056398	0.0976173	-2.29887	5.27184	4.81799
ELK4	All Targets	RNA	Endogenous	1	8	144	35.5	31.5472	1	1	2005	FALSE	0.524847	6.60847	0.52278	6.55418	3.03937	0.00334422	0.0803236	-1.94187	6.70871	6.32238
POLR3GL	All Targets	RNA	Endogenous	1	1	71	17.5	14.6931	1	1	84265	FALSE	0.600602	5.5992	0.522965	5.50544	2.83143	0.00588938	0.0988886	-2.35908	5.57875	5.39547
RCC1L	All Targets	RNA	Endogenous	1	3	76	25	23.7949	1	1	81554	FALSE	-0.439364	6.22118	0.523779	6.15901	3.46416	0.000866194	0.0478027	-0.734355	6.27907	5.97891
ITPR3	All Targets	RNA	Endogenous	1	8	244	35.5	36.4796	1	1	3710	FALSE	1.37076	6.8083	0.524374	6.76141	2.37539	0.0225662	0.173482	-3.53535	6.89687	6.55822
RBM34	All Targets	RNA	Endogenous	1	2	53	14.5	13.1832	1	1	23029	FALSE	0.437932	5.45142	0.52496	5.34227	2.71164	0.00822854	0.113303	-2.62275	5.38618	5.2764
DCTN2	All Targets	RNA	Endogenous	1	2	73	16.5	15.9585	1	1	10540	FALSE	0.616741	5.71668	0.52501	5.60751	2.96061	0.00406329	0.0871825	-2.06064	5.75681	5.38355
CFDP1	All Targets	RNA	Endogenous	1	8	127	40.5	38.3034	1	1	10428	FALSE	-0.990242	6.86898	0.52582	6.82986	3.90778	0.000196786	0.025863	0.577282	6.96551	6.62639
PSMA1	All Targets	RNA	Endogenous	1	6	85	18.5	21.6681	1	1	5682	FALSE	0.344625	6.09689	0.52732	6.02608	3.26353	0.00163307	0.0607594	-1.27779	6.17063	5.80927
LENG1	All Targets	RNA	Endogenous	1	22	229	79.5	80.3696	1	1	79165	FALSE	0.507499	7.90881	0.527456	7.88664	4.04251	0.000122942	0.0212272	0.981239	8.02569	7.67806
GMDS	All Targets	RNA	Endogenous	1	5	84	16.5	15.8745	1	1	2762	FALSE	0.696027	5.69311	0.528672	5.58942	2.8499	0.00561316	0.0976173	-2.33991	5.78158	5.30117
STEAP3	All Targets	RNA	Endogenous	1	1	62	11.5	10.8321	1	1	55240	FALSE	0.954947	5.2148	0.52873	5.08872	2.64918	0.00975926	0.121657	-2.74601	5.14961	4.99739
PTDSS2	All Targets	RNA	Endogenous	1	1	55	11	9.85421	1	1	81490	FALSE	-0.246224	5.08569	0.530963	4.95486	2.72565	0.00791662	0.111825	-2.56844	5.01564	4.86368
HMCES	All Targets	RNA	Endogenous	1	1	63	17	13.7088	1	1	56941	FALSE	0.378116	5.50832	0.531028	5.40833	2.92605	0.00449223	0.0905791	-2.13444	5.54174	5.20823
PIEZO1	All Targets	RNA	Endogenous	1	4	71	22	18.7967	1	1	9780	FALSE	0.176349	5.90896	0.531722	5.8286	2.74928	0.00760234	0.109793	-2.59334	5.94302	5.65698
PCSK7	All Targets	RNA	Endogenous	1	1	35	14	12.661	1	1	9159	FALSE	-0.896193	5.39401	0.531759	5.28672	3.11521	0.00256987	0.0731086	-1.64039	5.37334	5.15678
ARL15	All Targets	RNA	Endogenous	1	1	46	13	11.1821	1	1	54622	FALSE	0.510444	5.24953	0.532048	5.12511	2.82081	0.00606889	0.0992631	-2.37977	5.26901	4.90925
RAB35	All Targets	RNA	Endogenous	1	1	57	19	15.0141	1	1	11021	FALSE	0.237824	5.61812	0.53227	5.53041	3.0867	0.00279953	0.0748726	-1.72389	5.56121	5.4842
CYTH1	All Targets	RNA	Endogenous	1	7	115	25	22.3975	1	1	9267	FALSE	-0.128725	6.14241	0.532609	6.07027	3.3667	0.00118211	0.0543939	-0.992669	6.23152	5.8284
AKT1	All Targets	RNA	Endogenous	1	5	70	24	20.7813	1	1	207	FALSE	-0.148085	6.04014	0.532884	5.96624	3.34535	0.00126454	0.0561668	-1.05792	6.15005	5.69054
ABCC3	All Targets	RNA	Endogenous	1	20	516	62	69.822	1	1	8714	FALSE	1.14667	7.70993	0.533066	7.68595	3.48294	0.000816813	0.0467837	-0.72602	7.84829	7.44243
RRBP1	All Targets	RNA	Endogenous	1	9	153	51.5	43.7474	1	1	6238	FALSE	0.0647369	7.05481	0.534328	7.02074	3.60422	0.000548814	0.0384987	-0.35756	7.14637	6.8323
MSMO1	All Targets	RNA	Endogenous	1	1	41	13	11.0851	1	1	6307	FALSE	0.408591	5.23887	0.535743	5.11398	2.92934	0.0044496	0.0903415	-2.117	5.2609	4.89359
KLHL36	All Targets	RNA	Endogenous	1	1	69	21	16.9086	1	1	79786	FALSE	-0.514484	5.77169	0.536457	5.69195	3.11673	0.00255815	0.0728973	-1.65895	5.81896	5.50144
LTBR	All Targets	RNA	Endogenous	1	2	107	24	23.2052	1	1	4055	FALSE	1.08929	6.19391	0.536708	6.13066	3.7306	0.000360212	0.0334836	0.0483002	6.20089	6.02531
UNC5CL	All Targets	RNA	Endogenous	1	1	67	16.5	15.5861	1	1	222643	FALSE	0.29514	5.66985	0.537058	5.58062	2.68979	0.00893078	0.117406	-2.71356	5.73943	5.34242
CLCN3	All Targets	RNA	Endogenous	1	1	74	21.5	17.6286	1	1	1182	FALSE	0.179574	5.82977	0.538117	5.74971	2.97442	0.00390699	0.0852865	-2.03356	5.87789	5.55745
IL2RG	All Targets	RNA	Endogenous	1	1	159	17	15.0179	1	1	3561	FALSE	1.71445	5.64175	0.538313	5.55135	2.65944	0.00955791	0.120311	-2.7551	5.61493	5.45597
PLEC	All Targets	RNA	Endogenous	1	17	498	128.5	120.595	1	1	5339	FALSE	1.32967	8.48956	0.539275	8.47076	2.32841	0.0270327	0.189332	-3.79754	8.627	8.2364
KIF16B	All Targets	RNA	Endogenous	1	1	106	13	13.4478	1	1	55614	FALSE	0.522474	5.47995	0.539505	5.37843	2.74911	0.00741864	0.108706	-2.53391	5.35541	5.41294
ADGRL1	All Targets	RNA	Endogenous	1	1	33	10	9.11099	1	1	22859	FALSE	-0.334674	4.98924	0.539881	4.84077	2.99087	0.00371921	0.0835828	-1.93149	4.91044	4.73626
IFNAR2	All Targets	RNA	Endogenous	1	2	80	23	19.2626	1	1	3455	FALSE	0.858669	5.94551	0.540269	5.86663	2.90951	0.00475087	0.092627	-2.1985	5.96942	5.71246
FA2H	All Targets	RNA	Endogenous	1	4	199	18	21.9078	1	1	79152	FALSE	1.08333	6.11657	0.540282	6.04788	2.32829	0.0247501	0.181999	-3.55997	6.12196	5.93676
LRRFIP2	All Targets	RNA	Endogenous	1	4	75	26	25.3851	1	1	9209	FALSE	0.648898	6.31144	0.54071	6.25031	3.32334	0.00135512	0.0569767	-1.11927	6.35452	6.09398
DCC	All Targets	RNA	Endogenous	1	1	39	11	8.03769	1	1	1630	FALSE	-0.414166	4.87423	0.540824	4.6994	2.43284	0.0172757	0.157243	-3.19298	4.71957	4.66915
VPS37B	All Targets	RNA	Endogenous	1	7	120	33	29.8129	1	1	79720	FALSE	0.18584	6.52863	0.541026	6.47503	3.10012	0.00271558	0.0739935	-1.74037	6.59059	6.30169
SF3B3	All Targets	RNA	Endogenous	1	3	79	20	18.2789	1	1	23450	FALSE	-0.0932052	5.87112	0.541058	5.791	3.10725	0.00263213	0.0736142	-1.68808	5.92985	5.58274
PRKCZ	All Targets	RNA	Endogenous	1	1	70	18	16.0535	1	1	5590	FALSE	1.0106	5.71272	0.541371	5.62408	2.78485	0.00689974	0.105116	-2.50827	5.8191	5.33155
TMEM135	All Targets	RNA	Endogenous	1	1	54	14.5	11.8264	1	1	65084	FALSE	-0.295611	5.31303	0.543091	5.20023	2.85647	0.00548514	0.0970639	-2.28454	5.35215	4.97234
SLK	All Targets	RNA	Endogenous	1	6	92	29	26.6954	1	1	9748	FALSE	1.15718	6.38301	0.546969	6.32079	2.94131	0.00444035	0.0903415	-2.14978	6.34461	6.28506
LPGAT1	All Targets	RNA	Endogenous	1	8	192	34	30.6988	1	1	9926	FALSE	0.326352	6.57113	0.546988	6.51509	3.23907	0.00177353	0.0639029	-1.37864	6.64944	6.31355
BMS1	All Targets	RNA	Endogenous	1	2	49	14.5	12.5124	1	1	9790	FALSE	-0.16148	5.38822	0.548215	5.26978	2.83365	0.00585244	0.0988449	-2.31891	5.34607	5.15533
MREG	All Targets	RNA	Endogenous	1	1	25	12	9.42464	1	1	55686	FALSE	-0.187695	5.03734	0.548599	4.89342	2.70184	0.00845331	0.114797	-2.62742	5.0244	4.69695
NECAP2	All Targets	RNA	Endogenous	1	1	57	15.5	14.4495	1	1	55707	FALSE	-0.149738	5.56833	0.548734	5.47038	3.07881	0.00286645	0.0754817	-1.7351	5.5681	5.32381
NIPA1	All Targets	RNA	Endogenous	1	1	83	15.5	12.6391	1	1	123606	FALSE	0.531689	5.42707	0.549732	5.30768	2.73667	0.00767913	0.110444	-2.54625	5.38886	5.18592
ATP10B	All Targets	RNA	Endogenous	1	3	103	17	15.8047	1	1	23120	FALSE	-0.0394506	5.6933	0.550604	5.58834	3.0128	0.00348685	0.0812627	-1.92188	5.74377	5.35519
CTDSPL	All Targets	RNA	Endogenous	1	2	61	14	13.4014	1	1	10217	FALSE	0.297303	5.47093	0.550774	5.36283	2.83465	0.00583584	0.0988449	-2.33687	5.43262	5.25814
CYTH2	All Targets	RNA	Endogenous	1	9	104	32	33.1079	1	1	9266	FALSE	0.136256	6.6719	0.551169	6.62213	3.46266	0.00087038	0.0478027	-0.747612	6.7068	6.49512
TTYH3	All Targets	RNA	Endogenous	1	25	358	116	112.766	1	1	80727	FALSE	-0.477911	8.38606	0.551184	8.37215	4.30999	4.708e-05	0.0157528	1.84747	8.47271	8.22131
SWAP70	All Targets	RNA	Endogenous	1	1	46	14.5	11.1464	1	1	23075	FALSE	-0.0858728	5.24669	0.552194	5.12839	3.09191	0.0027562	0.0747571	-1.69165	5.22198	4.988
TRAPPC5	All Targets	RNA	Endogenous	1	1	60	17	14.5471	1	1	126003	FALSE	1.01539	5.58599	0.55243	5.49129	2.96736	0.00398401	0.0860641	-2.02595	5.59529	5.33528
RBM12	All Targets	RNA	Endogenous	1	2	43	13	12.7198	1	1	10137	FALSE	0.0479552	5.40465	0.553166	5.28571	2.98582	0.00377465	0.0839545	-1.95827	5.44711	5.04362
PRR14L	All Targets	RNA	Endogenous	1	1	43	17.5	11.425	1	1	253143	FALSE	1.09068	5.27896	0.553167	5.16217	2.98839	0.00374634	0.0837511	-1.97026	5.34181	4.89271
PFKP	All Targets	RNA	Endogenous	1	5	98	30.5	29.19	1	1	5214	FALSE	0.0414123	6.50109	0.553267	6.44418	3.36773	0.00118026	0.0543939	-1.02372	6.66161	6.11803
MYLK4	All Targets	RNA	Endogenous	1	2	68	23	18.9742	1	1	340156	FALSE	0.940204	5.92741	0.553477	5.84626	3.23109	0.00180535	0.0639029	-1.34789	5.93686	5.71037
DNM2	All Targets	RNA	Endogenous	1	13	313	47.5	48.4555	1	1	1785	FALSE	-0.0891445	7.19672	0.553707	7.164	3.64869	0.000473696	0.0363597	-0.233097	7.33539	6.90691
RASA2	All Targets	RNA	Endogenous	1	4	64	16	15.7569	1	1	5922	FALSE	0.188294	5.68104	0.553808	5.58183	2.87489	0.00523421	0.0957917	-2.26364	5.73125	5.35771
RSRP1	All Targets	RNA	Endogenous	1	10	198	40	40.0548	1	1	57035	FALSE	-0.131988	6.93335	0.553845	6.8937	3.70488	0.000392715	0.034039	-0.0594392	7.09368	6.59373
HLA-F	All Targets	RNA	Endogenous	1	2	224	31.5	27.3126	1	1	3134	FALSE	1.72046	6.42253	0.555121	6.35869	2.42575	0.019993	0.16696	-3.40636	6.48349	6.17149
NSMF	All Targets	RNA	Endogenous	1	4	120	20	20.0221	1	1	26012	FALSE	0.107688	5.99614	0.555131	5.9177	3.41575	0.00101156	0.0509677	-0.862593	5.98852	5.81148
CMC1	All Targets	RNA	Endogenous	1	2	55	15.5	13.8399	1	1	152100	FALSE	0.0717335	5.51239	0.555857	5.40576	3.08185	0.00284044	0.0754201	-1.71932	5.49781	5.26768
ACADVL	All Targets	RNA	Endogenous	1	14	259	54	51.8353	1	1	37	FALSE	0.659584	7.29798	0.556797	7.26011	4.29826	4.91386e-05	0.0157528	1.82397	7.52966	6.8558
PGGHG	All Targets	RNA	Endogenous	1	1	130	20.5	18.3479	1	1	80162	FALSE	0.903515	5.88624	0.556915	5.80782	3.21578	0.00189246	0.0650162	-1.40665	5.86513	5.72186
SYVN1	All Targets	RNA	Endogenous	1	1	81	14	13.6069	1	1	84447	FALSE	-0.194865	5.49212	0.557342	5.39437	3.15267	0.0022947	0.0703942	-1.54718	5.47873	5.26782
INHA	All Targets	RNA	Endogenous	1	1	66	20	13.2924	1	1	3623	FALSE	0.897593	5.48349	0.557551	5.37479	2.76533	0.00713652	0.107006	-2.50829	5.41185	5.31922
SDC4	All Targets	RNA	Endogenous	1	14	342	55	50.257	1	1	6385	FALSE	1.55909	7.25013	0.558283	7.21713	3.31313	0.00149372	0.0581616	-1.24058	7.32492	7.05545
SHROOM3	All Targets	RNA	Endogenous	1	1	132	18.5	17.2763	1	1	57619	FALSE	0.256595	5.80707	0.559443	5.72594	2.946	0.00427621	0.0886602	-2.09764	5.8378	5.55816
BRPF3	All Targets	RNA	Endogenous	1	1	42	14.5	13.3899	1	1	27154	FALSE	0.550328	5.48404	0.55945	5.36759	2.81873	0.00621302	0.099931	-2.40495	5.50073	5.16789
PTPRH	All Targets	RNA	Endogenous	1	4	88	17.5	16.5764	1	1	5794	FALSE	-0.751313	5.74669	0.56024	5.65118	3.34161	0.00127951	0.0561668	-1.05928	5.84724	5.3571
SAT1	All Targets	RNA	Endogenous	1	9	400	60	57.6484	1	1	6303	FALSE	2.07122	7.44441	0.562506	7.41426	3.67343	0.000436404	0.0347056	-0.158752	7.48026	7.31525
ALAS1	All Targets	RNA	Endogenous	1	1	57	14	13.2344	1	1	211	FALSE	0.796339	5.46651	0.563126	5.3555	2.84816	0.00561633	0.0976173	-2.30275	5.47974	5.16913
VPS37C	All Targets	RNA	Endogenous	1	1	43	13.5	11.3959	1	1	55048	FALSE	0.0917635	5.27221	0.563711	5.1527	2.89701	0.00488456	0.0938028	-2.16721	5.24145	5.01958
ZNF219	All Targets	RNA	Endogenous	1	1	64	15	11.7754	1	1	51222	FALSE	0.292157	5.32092	0.564484	5.20179	2.7836	0.00675864	0.103932	-2.4556	5.34637	4.98491
GPX2	All Targets	RNA	Endogenous	1	5	131	23	27.8989	1	1	2877	FALSE	1.23217	6.44374	0.565772	6.38617	2.70928	0.00934894	0.118953	-2.77302	6.42669	6.32541
STX4	All Targets	RNA	Endogenous	1	6	97	32.5	28.729	1	1	6810	FALSE	0.275729	6.4796	0.567864	6.42578	3.33774	0.00129517	0.0564305	-1.07847	6.52438	6.27789
SLC9A3	All Targets	RNA	Endogenous	1	1	74	14	13.0325	1	1	6550	FALSE	0.688068	5.44722	0.568699	5.34029	2.76535	0.00730885	0.108108	-2.53226	5.419	5.22223
UAP1	All Targets	RNA	Endogenous	1	7	99	28.5	26.9632	1	1	6675	FALSE	0.0709096	6.39375	0.570431	6.33051	3.60516	0.000547103	0.0384987	-0.333153	6.58375	5.95064
CHMP4C	All Targets	RNA	Endogenous	1	1	41	12	10.3817	1	1	92421	FALSE	0.221125	5.1606	0.573364	5.02308	2.95894	0.00408306	0.0871825	-2.03802	5.18947	4.77349
MLXIP	All Targets	RNA	Endogenous	1	2	63	16.5	17.6626	1	1	22877	FALSE	-0.314398	5.82608	0.575642	5.74402	3.49175	0.000792393	0.0461404	-0.639753	5.96199	5.41706
BTG2	All Targets	RNA	Endogenous	1	5	141	28.5	26.1055	1	1	7832	FALSE	0.352147	6.35156	0.57662	6.29024	2.80883	0.00729364	0.108015	-2.57303	6.5995	5.82634
SATB1	All Targets	RNA	Endogenous	1	2	46	17	14.4973	1	1	6304	FALSE	0.333915	5.57172	0.576857	5.46952	3.31396	0.00139555	0.0574473	-1.12152	5.56552	5.32551
ACHE	All Targets	RNA	Endogenous	1	2	125	18.5	17.4054	1	1	43	FALSE	0.812367	5.8157	0.576994	5.72344	3.33607	0.00130202	0.0565925	-1.08198	5.89959	5.45921
RCOR1	All Targets	RNA	Endogenous	1	2	39	15	12.0413	1	1	23186	FALSE	0.567049	5.34233	0.577192	5.2194	2.9248	0.00455059	0.0912193	-2.13554	5.38662	4.96859
LY6G5B	All Targets	RNA	Endogenous	1	3	36	12	11.8263	1	1	58496	FALSE	0.0946256	5.31334	0.578143	5.18411	2.95334	0.00415017	0.0875565	-2.03927	5.33449	4.95854
KIF5B	All Targets	RNA	Endogenous	1	8	178	32	30.6099	1	1	3799	FALSE	0.779173	6.5665	0.578825	6.51247	3.66042	0.000455576	0.035885	-0.16383	6.69603	6.23711
CLUH	All Targets	RNA	Endogenous	1	4	46	15	12.5711	1	1	23277	FALSE	0.240123	5.39459	0.579114	5.26802	3.08055	0.00285156	0.0754201	-1.72825	5.4738	4.95935
CTTN	All Targets	RNA	Endogenous	1	17	252	76.5	72.8808	1	1	2017	FALSE	1.31588	7.7708	0.579308	7.74732	3.91812	0.000189872	0.0257511	0.595996	7.82057	7.63745
EPS8L3	All Targets	RNA	Endogenous	1	2	166	22.5	23.4071	1	1	79574	FALSE	1.37256	6.21832	0.579556	6.14406	2.73134	0.00915823	0.118433	-2.76442	6.34126	5.84826
SHFL	All Targets	RNA	Endogenous	1	4	172	41.5	40.8118	1	1	55337	FALSE	-0.430442	6.9584	0.58121	6.92218	4.03572	0.000125918	0.0212272	0.976246	7.03811	6.74828
CREB3	All Targets	RNA	Endogenous	1	3	287	22.5	25.084	1	1	10488	FALSE	1.49434	6.31282	0.581484	6.23785	2.58787	0.0128328	0.136663	-3.0062	6.3086	6.13174
ABI1	All Targets	RNA	Endogenous	1	7	140	38.5	34.7301	1	1	10006	FALSE	-0.0738789	6.73641	0.582156	6.69199	4.16459	7.96622e-05	0.0181892	1.39277	6.89294	6.39057
MIGA2	All Targets	RNA	Endogenous	1	1	51	15.5	11.088	1	1	84895	FALSE	0.21796	5.24607	0.584246	5.12069	2.9409	0.00430302	0.0888465	-2.07514	5.23159	4.95435
SMAD1	All Targets	RNA	Endogenous	1	1	42	10.5	10.0262	1	1	4086	FALSE	-0.452767	5.11758	0.584363	4.96913	2.97184	0.00393228	0.0853556	-1.97612	5.01589	4.89899
DDX25	All Targets	RNA	Endogenous	1	1	34	11	10.3747	1	1	29118	FALSE	0.105275	5.14921	0.584715	5.01465	2.90344	0.00479504	0.0932035	-2.14888	5.13335	4.83661
DTX4	All Targets	RNA	Endogenous	1	2	48	13	12.8977	1	1	23220	FALSE	0.202263	5.43177	0.586312	5.31556	3.02028	0.00341079	0.0805904	-1.87239	5.39495	5.19647
SRPK1	All Targets	RNA	Endogenous	1	4	184	29	28.5951	1	1	6732	FALSE	-0.220229	6.47244	0.586854	6.42076	3.78538	0.000299324	0.0313274	0.21927	6.5316	6.25451
PFKM	All Targets	RNA	Endogenous	1	1	34	10	9.37156	1	1	5213	FALSE	0.367806	5.03277	0.58839	4.8755	2.9115	0.00468489	0.0922555	-2.12834	5.01924	4.6599
CENPT	All Targets	RNA	Endogenous	1	2	169	19.5	18.6011	1	1	80152	FALSE	2.16812	5.9215	0.590394	5.82547	2.83723	0.00601161	0.0992631	-2.36206	5.94735	5.64265
NARF	All Targets	RNA	Endogenous	1	2	53	13.5	11.4381	1	1	26502	FALSE	0.168121	5.27448	0.592115	5.14831	3.20584	0.0019511	0.0654163	-1.39512	5.30084	4.91952
CES2	All Targets	RNA	Endogenous	1	1	101	18	14.4606	1	1	8824	FALSE	0.231152	5.57617	0.592286	5.48355	3.05082	0.00311953	0.0778287	-1.80999	5.63336	5.25883
VASP	All Targets	RNA	Endogenous	1	14	280	68	77.9334	1	1	7408	FALSE	0.082477	7.86977	0.593607	7.84409	4.28993	5.06522e-05	0.0157528	1.78863	7.9963	7.61577
ATXN1	All Targets	RNA	Endogenous	1	2	75	23.5	21.7822	1	1	6310	FALSE	-0.194782	6.10397	0.593703	6.03517	3.44949	0.000908009	0.0484103	-0.767331	6.20206	5.78485
NPR2	All Targets	RNA	Endogenous	1	2	49	17	15.9781	1	1	4882	FALSE	0.143709	5.69754	0.594192	5.60072	3.46282	0.000869925	0.0478027	-0.709004	5.7749	5.33946
CABIN1	All Targets	RNA	Endogenous	1	1	77	14.5	11.3805	1	1	23523	FALSE	0.432924	5.27859	0.596055	5.15356	2.90071	0.00485145	0.0936942	-2.17082	5.35809	4.84677
TSPAN3	All Targets	RNA	Endogenous	1	7	252	58	56.9273	1	1	10099	FALSE	0.383568	7.42257	0.596405	7.39591	3.85851	0.000233282	0.0280529	0.412188	7.45018	7.31451
SF1	All Targets	RNA	Endogenous	1	7	90	21.5	24.9514	1	1	7536	FALSE	0.384545	6.28903	0.597825	6.22151	3.69364	0.000407772	0.0345324	-0.0615908	6.45753	5.86747
ST14	All Targets	RNA	Endogenous	1	12	245	33	40.4642	1	1	6768	FALSE	0.633615	6.95374	0.59804	6.90851	3.72505	0.000366995	0.0336033	0.0187772	7.03479	6.71909
NR1I2	All Targets	RNA	Endogenous	1	1	53	15.5	11.4212	1	1	8856	FALSE	0.308787	5.28185	0.599279	5.16519	2.88686	0.00508742	0.0947216	-2.21296	5.31567	4.93947
NUDT22	All Targets	RNA	Endogenous	1	1	46	15	14.4256	1	1	84304	FALSE	-0.828971	5.5644	0.600676	5.47096	3.5007	0.000769779	0.0453767	-0.595995	5.60594	5.26848
FBXO11	All Targets	RNA	Endogenous	1	3	65	16.5	17.1906	1	1	80204	FALSE	-0.309391	5.79238	0.601602	5.702	3.46212	0.000871887	0.0478027	-0.712108	5.79487	5.56271
POMP	All Targets	RNA	Endogenous	1	11	216	48.5	49.099	1	1	51371	FALSE	0.999623	7.21831	0.602232	7.18321	4.34588	4.12871e-05	0.0156067	1.98952	7.32977	6.96336
TFG	All Targets	RNA	Endogenous	1	5	135	31	30.7433	1	1	10342	FALSE	0.570183	6.57218	0.603504	6.52036	3.9665	0.000160483	0.0234407	0.766572	6.66544	6.30274
CDH17	All Targets	RNA	Endogenous	1	1	122	16.5	15.2397	1	1	1015	FALSE	1.23833	5.65332	0.603719	5.54828	2.41015	0.0212801	0.1706	-3.42761	5.85944	5.08153
TXLNA	All Targets	RNA	Endogenous	1	1	70	17.5	13.011	1	1	200081	FALSE	0.412973	5.43837	0.607284	5.34048	3.40219	0.00105623	0.0520556	-0.873044	5.44321	5.1864
IFRD1	All Targets	RNA	Endogenous	1	1	58	17.5	14.1747	1	1	3475	FALSE	1.40645	5.55801	0.608617	5.45571	3.23555	0.0017861	0.0639029	-1.33914	5.54992	5.31438
MINK1	All Targets	RNA	Endogenous	1	5	78	27	25.5023	1	1	50488	FALSE	-0.342388	6.31811	0.609761	6.25392	4.15289	8.30695e-05	0.0184173	1.3663	6.40811	6.02263
ARHGEF2	All Targets	RNA	Endogenous	1	15	121	32	34.0264	1	1	9181	FALSE	0.569711	6.71204	0.610143	6.65919	3.94367	0.000173761	0.0247202	0.686189	6.89018	6.3127
PATL1	All Targets	RNA	Endogenous	1	1	43	12	10.0927	1	1	219988	FALSE	0.120513	5.12513	0.611039	4.99127	3.29225	0.00149352	0.0581616	-1.15571	5.07256	4.86935
ARHGEF1	All Targets	RNA	Endogenous	1	8	83	32.5	32.0901	1	1	9138	FALSE	0.29724	6.62842	0.612137	6.57777	4.1509	8.36628e-05	0.0184173	1.36122	6.67534	6.43141
ZDHHC5	All Targets	RNA	Endogenous	1	7	98	26.5	28.1556	1	1	25921	FALSE	-0.35565	6.44847	0.613077	6.39336	4.03909	0.00012443	0.0212272	1.0039	6.50177	6.23075
PITX1	All Targets	RNA	Endogenous	1	4	426	38.5	37.8393	1	1	5307	FALSE	2.37405	6.86718	0.614925	6.81944	3.21145	0.00210574	0.0671084	-1.49276	6.85577	6.76495
C4BPB	All Targets	RNA	Endogenous	1	2	153	24	17.7512	1	1	725	FALSE	1.40285	5.84574	0.615092	5.76494	2.34786	0.0254248	0.184775	-3.59707	5.94436	5.49581
DCAF8	All Targets	RNA	Endogenous	1	3	103	30	26.1473	1	1	50717	FALSE	-0.722059	6.34932	0.615495	6.29356	3.80842	0.00027676	0.0307159	0.28438	6.43398	6.08292
FUT6	All Targets	RNA	Endogenous	1	1	84	12	10.95	1	1	2528	FALSE	0.955435	5.22829	0.615716	5.10157	2.71792	0.00849039	0.114891	-2.62381	5.20151	4.95167
TP53BP2	All Targets	RNA	Endogenous	1	5	49	17	16.4062	1	1	7159	FALSE	0.414657	5.73667	0.617925	5.63382	3.20102	0.00201235	0.0659596	-1.44011	5.83166	5.33706
NELFCD	All Targets	RNA	Endogenous	1	3	68	19	17.0512	1	1	51497	FALSE	0.135954	5.7802	0.618628	5.69103	3.46227	0.000871478	0.0478027	-0.709759	5.83836	5.47003
INO80D	All Targets	RNA	Endogenous	1	1	57	19	16.601	1	1	54891	FALSE	-0.513957	5.74603	0.620018	5.66209	3.69557	0.000405152	0.0344723	-0.0377857	5.84494	5.38782
MGLL	All Targets	RNA	Endogenous	1	1	168	21	21.3375	1	1	11343	FALSE	1.61233	6.08722	0.620778	6.01812	2.98193	0.00451118	0.0907165	-2.14078	6.22356	5.70995
CARD11	All Targets	RNA	Endogenous	1	5	116	35.5	34.4253	1	1	84433	FALSE	0.766464	6.72804	0.621527	6.67799	3.97972	0.00015325	0.023325	0.811082	6.80182	6.49225
PANK3	All Targets	RNA	Endogenous	1	3	113	22	24.8206	1	1	79646	FALSE	0.0876087	6.27923	0.621961	6.21963	4.08165	0.000107058	0.0207647	1.13698	6.40716	5.93832
WNT3	All Targets	RNA	Endogenous	1	5	267	31	37.6493	1	1	7473	FALSE	0.725667	6.86296	0.625394	6.81216	4.10253	9.94097e-05	0.0201663	1.19483	6.89076	6.69425
FABP1	All Targets	RNA	Endogenous	1	6	165	41.5	42.5733	1	1	2168	FALSE	0.150962	7.0187	0.628284	6.98208	4.28032	5.24556e-05	0.0160368	1.77471	7.04797	6.88325
MAP2K5	All Targets	RNA	Endogenous	1	1	115	18.5	16.3219	1	1	5607	FALSE	0.769546	5.74092	0.628788	5.64723	3.65053	0.00047082	0.0363597	-0.1663	5.7737	5.45752
RAB33A	All Targets	RNA	Endogenous	1	1	54	15.5	11.007	1	1	9363	FALSE	0.311827	5.2384	0.629029	5.1145	3.07561	0.00289392	0.075551	-1.71951	5.21643	4.9616
CLK3	All Targets	RNA	Endogenous	1	1	42	14.5	13.2179	1	1	1198	FALSE	0.13078	5.45468	0.630101	5.34439	3.28383	0.00153321	0.0590939	-1.19536	5.4888	5.12778
MAP3K6	All Targets	RNA	Endogenous	1	2	47	13.5	13.3373	1	1	9064	FALSE	-0.175437	5.46604	0.631726	5.35598	3.31487	0.00139159	0.0574405	-1.10511	5.49935	5.14091
TRIM31	All Targets	RNA	Endogenous	1	6	115	20.5	22.618	1	1	11074	FALSE	0.408411	6.16272	0.633513	6.08558	3.68226	0.000423583	0.0347056	-0.0894626	6.34888	5.69062
TPRN	All Targets	RNA	Endogenous	1	1	51	12.5	11.4757	1	1	286262	FALSE	-0.403171	5.28317	0.635857	5.15756	3.27295	0.00158601	0.0599759	-1.21742	5.3558	4.8602
BAIAP2L1	All Targets	RNA	Endogenous	1	9	159	42.5	39.4532	1	1	55971	FALSE	-0.675544	6.91462	0.636848	6.87214	4.3343	4.30766e-05	0.0156067	1.95544	7.00378	6.67467
GFPT1	All Targets	RNA	Endogenous	1	7	159	34	31.7634	1	1	2673	FALSE	0.300505	6.61718	0.639795	6.56546	4.18643	7.36564e-05	0.017549	1.47027	6.78466	6.23665
TMPRSS2	All Targets	RNA	Endogenous	1	4	93	18	17.5731	1	1	7113	FALSE	0.257214	5.82046	0.639986	5.73218	3.58876	0.000577467	0.039307	-0.350503	5.89543	5.4873
GUCY2C	All Targets	RNA	Endogenous	1	1	91	15	13.2231	1	1	2984	FALSE	0.558886	5.46494	0.641475	5.36233	3.10022	0.0029672	0.0762063	-1.7634	5.59311	5.01617
RNF34	All Targets	RNA	Endogenous	1	1	79	13	12.1294	1	1	80196	FALSE	0.408665	5.35001	0.642111	5.23692	3.41305	0.00102029	0.0510824	-0.835927	5.38405	5.01622
ADGRE5	All Targets	RNA	Endogenous	1	5	161	32.5	30.504	1	1	976	FALSE	1.19727	6.56316	0.642188	6.50839	4.08557	0.000105578	0.0207647	1.14185	6.73905	6.16241
ADCK5	All Targets	RNA	Endogenous	1	1	65	14	11.8124	1	1	203054	FALSE	-0.217043	5.34134	0.646013	5.21302	3.32393	0.00135261	0.0569767	-1.07806	5.42593	4.89365
TRIM15	All Targets	RNA	Endogenous	1	1	53	14.5	14.8583	1	1	89870	FALSE	-0.252895	5.60603	0.646319	5.50519	3.49389	0.000786942	0.0460872	-0.616272	5.76316	5.11824
NCOA7	All Targets	RNA	Endogenous	1	5	108	32	30.1198	1	1	135112	FALSE	1.62436	6.54951	0.647218	6.49194	3.12975	0.00286109	0.0754509	-1.73699	6.71291	6.1605
MITD1	All Targets	RNA	Endogenous	1	1	70	22	18.9137	1	1	129531	FALSE	0.415802	5.92347	0.649172	5.84824	3.91282	0.000193385	0.0257802	0.616561	5.9826	5.64669
GOLM1	All Targets	RNA	Endogenous	1	14	312	48.5	43.9372	1	1	51280	FALSE	0.0924372	7.06446	0.651142	7.02531	3.38925	0.00146946	0.0581616	-1.1873	7.20488	6.75594
CORO2A	All Targets	RNA	Endogenous	1	3	69	18.5	17.276	1	1	7464	FALSE	0.199493	5.7976	0.654167	5.71075	3.74279	0.000345714	0.0333476	0.103803	5.85795	5.48994
TMEM45B	All Targets	RNA	Endogenous	1	2	193	19.5	19.6404	1	1	120224	FALSE	0.854764	5.97055	0.654843	5.89688	3.40897	0.00113315	0.0540733	-0.94333	6.03755	5.68587
CERT1	All Targets	RNA	Endogenous	1	3	59	16	14.3713	1	1	10087	FALSE	-0.208689	5.55881	0.659435	5.45611	3.68581	0.000418594	0.0347056	-0.061703	5.6151	5.21763
LGALS4	All Targets	RNA	Endogenous	1	18	664	75.5	90.0165	1	1	3960	FALSE	1.82569	8.07153	0.66047	8.05117	2.50132	0.0183895	0.16079	-3.4365	8.33168	7.63041
ITPRID2	All Targets	RNA	Endogenous	1	32	374	100	93.0598	1	1	6744	FALSE	0.449031	8.11478	0.660753	8.09629	4.00558	0.000186034	0.0257511	0.635104	8.32204	7.75765
PRDM5	All Targets	RNA	Endogenous	1	1	117	26.5	19.927	1	1	11107	FALSE	1.24082	6.00029	0.66351	5.92506	3.87371	0.000221327	0.0271584	0.498516	5.96857	5.8598
MRPL11	All Targets	RNA	Endogenous	1	3	63	18	16.9576	1	1	65003	FALSE	0.368365	5.77578	0.664987	5.68764	3.49053	0.000795525	0.0461404	-0.626823	5.88222	5.39577
RHOF	All Targets	RNA	Endogenous	1	8	151	24	25.0204	1	1	54509	FALSE	0.687853	6.29859	0.666603	6.22981	3.72766	0.000371991	0.0336596	0.0282142	6.42683	5.93428
AGR2	All Targets	RNA	Endogenous	1	5	408	38.5	36.3354	1	1	10551	FALSE	2.18209	6.82677	0.66704	6.76457	2.33372	0.0267866	0.188741	-3.65446	7.06035	6.32089
H4C1	All Targets	RNA	Endogenous	1	7	304	65	49.8754	1	1	8359	FALSE	1.5478	7.24274	0.669535	7.20799	3.85535	0.000260734	0.0297811	0.340443	7.29644	7.07531
FBRS	All Targets	RNA	Endogenous	1	30	573	105	106.288	1	1	64319	FALSE	-0.0892069	8.30398	0.669931	8.28742	4.48326	2.88383e-05	0.0126875	2.31587	8.49179	7.98087
KIF13A	All Targets	RNA	Endogenous	1	1	66	18	14.5009	1	1	63971	FALSE	0.0187311	5.59051	0.670986	5.49091	2.92962	0.00525268	0.0959047	-2.23137	5.74923	5.10343
PRDM8	All Targets	RNA	Endogenous	1	1	38	15	12.5678	1	1	56978	FALSE	-0.120691	5.39031	0.671343	5.27611	3.67895	0.000428297	0.0347056	-0.0824109	5.46648	4.99055
SEMA4B	All Targets	RNA	Endogenous	1	13	238	41	46.9549	1	1	10509	FALSE	0.0950318	7.15581	0.672265	7.11931	4.24417	6.2933e-05	0.0174981	1.60772	7.2719	6.89044
LYSMD1	All Targets	RNA	Endogenous	1	1	41	13	9.57594	1	1	388695	FALSE	0.602516	5.07329	0.672525	4.92789	3.17374	0.00215227	0.0678718	-1.46338	4.99742	4.8236
BACE2	All Targets	RNA	Endogenous	1	13	263	44.5	45.0287	1	1	25825	FALSE	0.396947	7.09598	0.6778	7.05982	4.06571	0.000129606	0.0214422	0.964017	7.28334	6.72454
ANXA5	All Targets	RNA	Endogenous	1	7	164	29.5	32.487	1	1	308	FALSE	0.540155	6.65177	0.678721	6.59759	4.1043	9.91085e-05	0.0201663	1.20388	6.73958	6.38461
TM2D1	All Targets	RNA	Endogenous	1	1	57	18	14.6485	1	1	83941	FALSE	-0.0991911	5.59669	0.680868	5.50365	3.52357	0.000718133	0.0437855	-0.53644	5.60425	5.35275
FRK	All Targets	RNA	Endogenous	1	2	44	14.5	12.5053	1	1	2444	FALSE	-0.206903	5.38678	0.692004	5.26807	3.677	0.000431089	0.0347056	-0.0870756	5.46642	4.97054
NSRP1	All Targets	RNA	Endogenous	1	1	50	15	12.7343	1	1	84081	FALSE	0.84193	5.41741	0.695529	5.30326	2.5561	0.014851	0.146704	-3.06859	5.34802	5.23612
GALNT5	All Targets	RNA	Endogenous	1	1	128	18.5	19.9219	1	1	11227	FALSE	1.50283	5.99795	0.695865	5.91989	3.48384	0.000860722	0.0478027	-0.689718	6.04131	5.73776
SERPINB6	All Targets	RNA	Endogenous	1	9	238	43	42.4096	1	1	5269	FALSE	0.630192	7.0171	0.715089	6.97454	4.2638	6.40405e-05	0.0174981	1.6081	7.18641	6.65675
MTMR11	All Targets	RNA	Endogenous	1	4	345	34	33.6638	1	1	10903	FALSE	1.32555	6.7101	0.715521	6.65076	4.33356	4.57291e-05	0.0157528	1.90726	6.94786	6.20511
MYO7B	All Targets	RNA	Endogenous	1	2	154	18	17.4685	1	1	4648	FALSE	0.822529	5.84093	0.719614	5.73106	4.33313	4.32605e-05	0.0156067	1.95691	6.05573	5.24406
CYP3A5	All Targets	RNA	Endogenous	1	8	287	29	33.6037	1	1	1577	FALSE	0.455422	6.70487	0.722144	6.6471	5.22396	1.41296e-06	0.00350875	5.09121	6.94423	6.20141
EZR	All Targets	RNA	Endogenous	1	47	704	153	168.89	1	1	7430	FALSE	1.6173	8.96423	0.727083	8.9527	3.37393	0.0020257	0.0659596	-1.47728	9.12494	8.69433
RAB39A	All Targets	RNA	Endogenous	1	4	142	43	39.0291	1	1	54734	FALSE	1.28245	6.90249	0.728895	6.86099	4.8067	7.28716e-06	0.00773211	3.57759	6.98117	6.68073
GCN1	All Targets	RNA	Endogenous	1	1	62	14.5	12.0316	1	1	10985	FALSE	-0.220045	5.33302	0.745143	5.22087	4.05551	0.000117429	0.0212272	1.05221	5.37863	4.98422
MMP1	All Targets	RNA	Endogenous	1	1	168	16	13.4761	1	1	4312	FALSE	1.4241	5.49906	0.752482	5.38896	2.27928	0.0302606	0.199649	-3.67257	5.55596	5.13844
MXD1	All Targets	RNA	Endogenous	1	6	331	39	42.6077	1	1	4084	FALSE	1.52046	7.02179	0.756128	6.98392	2.67901	0.012107	0.133665	-2.99555	7.1336	6.7594
ADRA2A	All Targets	RNA	Endogenous	1	2	52	14	11.3994	1	1	150	FALSE	0.00394759	5.27427	0.759334	5.14724	4.29774	4.92307e-05	0.0157528	1.806	5.33943	4.85897
AHCYL2	All Targets	RNA	Endogenous	1	1	66	17.5	14.3642	1	1	23382	FALSE	0.0483701	5.57015	0.762323	5.46893	3.6558	0.000539276	0.0384987	-0.266273	5.68717	5.14157
TESC	All Targets	RNA	Endogenous	1	6	333	39.5	45.5069	1	1	54997	FALSE	2.14593	7.11493	0.763361	7.08034	3.63798	0.00076682	0.0453505	-0.569504	7.20989	6.88601
ACSS1	All Targets	RNA	Endogenous	1	1	59	22	16.9452	1	1	84532	FALSE	0.6876	5.77889	0.763724	5.69699	4.08465	0.00010886	0.0208895	1.1313	5.87981	5.42277
GPRC5A	All Targets	RNA	Endogenous	1	16	827	115.5	112.303	1	1	9052	FALSE	1.99731	8.38439	0.771691	8.36816	4.61494	2.80697e-05	0.012658	2.39262	8.55866	8.08241
C3orf52	All Targets	RNA	Endogenous	1	6	74	20	20.7253	1	1	79669	FALSE	0.726548	6.04057	0.785786	5.96151	4.20561	7.30869e-05	0.017549	1.49135	6.20213	5.60058
ANTXR2	All Targets	RNA	Endogenous	1	3	126	21.5	23.8774	1	1	118429	FALSE	1.17886	6.23726	0.790299	6.16395	4.3833	4.2071e-05	0.0156067	1.99816	6.43326	5.76
SERPINB1	All Targets	RNA	Endogenous	1	17	242	61.5	64.5213	1	1	1992	FALSE	1.75617	7.60089	0.791698	7.57247	4.08828	0.00018983	0.0257511	0.675783	7.81939	7.20209
TRNP1	All Targets	RNA	Endogenous	1	7	182	42.5	41.0921	1	1	388610	FALSE	2.07654	6.97522	0.798144	6.93129	3.29757	0.0024056	0.0707869	-1.56128	7.22374	6.49261
TSPAN8	All Targets	RNA	Endogenous	1	7	287	59.5	52.7817	1	1	7103	FALSE	1.87119	7.32533	0.81628	7.29192	2.62893	0.0136813	0.140618	-3.11873	7.53235	6.93126
FGFR4	All Targets	RNA	Endogenous	1	2	85	17.5	15.0041	1	1	2264	FALSE	1.0271	5.62322	0.816739	5.5273	4.02885	0.000130759	0.0214422	0.96182	5.7289	5.2249
CYSTM1	All Targets	RNA	Endogenous	1	14	418	61.5	63.7008	1	1	84418	FALSE	1.70413	7.58554	0.816849	7.5556	3.42065	0.00177741	0.0639029	-1.30136	7.83061	7.14309
OSBPL2	All Targets	RNA	Endogenous	1	4	137	39	34.9652	1	1	9885	FALSE	0.308002	6.74654	0.829341	6.7052	5.49363	4.74743e-07	0.00171268	6.07775	6.85007	6.4879
AGO2	All Targets	RNA	Endogenous	1	1	47	19	15.8486	1	1	27161	FALSE	-0.0330739	5.69082	0.84478	5.5963	4.42788	3.10811e-05	0.0133486	2.24655	5.79102	5.30422
IPPK	All Targets	RNA	Endogenous	1	1	28	12.5	8.94158	1	1	64768	FALSE	0.383355	4.97612	0.880832	4.81789	4.05335	0.000118329	0.0212272	1.0174	4.99557	4.55136
PPP1R1B	All Targets	RNA	Endogenous	1	1	100	21.5	18.797	1	1	84152	FALSE	1.85207	5.92125	0.884759	5.83838	4.3849	4.64389e-05	0.0157528	1.91502	6.12769	5.40442
ATP7B	All Targets	RNA	Endogenous	1	1	69	13.5	10.5111	1	1	540	FALSE	1.05201	5.18753	0.887804	5.05839	3.38713	0.00145383	0.0581616	-1.08865	5.17574	4.88236
GCNT3	All Targets	RNA	Endogenous	1	13	559	44.5	49.7969	1	1	9245	FALSE	1.30341	7.24306	0.90768	7.20526	3.56889	0.00124391	0.0556764	-0.964299	7.40012	6.91296
KCNK1	All Targets	RNA	Endogenous	1	8	175	28.5	29.1356	1	1	3775	FALSE	1.90742	6.50575	0.92793	6.44328	5.62601	2.76128e-07	0.0012452	6.57602	6.75041	5.98258
TMC5	All Targets	RNA	Endogenous	1	8	221	44.5	45.175	1	1	79838	FALSE	1.37983	7.10518	0.931306	7.06525	6.21898	2.29217e-08	0.000166598	8.88521	7.33584	6.65937
AADAC	All Targets	RNA	Endogenous	1	1	52	15	12.7817	1	1	13	FALSE	1.54874	5.42639	0.978779	5.31276	4.79936	7.85681e-06	0.0078734	3.45208	5.42713	5.14119
ZNF229	All Targets	RNA	Endogenous	1	1	100	10	8.45518	1	1	7772	FALSE	1.92217	4.92717	1.07499	4.75687	2.92333	0.0066685	0.103162	-2.33486	5.00928	4.37825
TM4SF20	All Targets	RNA	Endogenous	1	1	438	15	12.2587	1	1	79853	FALSE	1.78502	5.38893	1.14804	5.26452	2.45313	0.0205666	0.168674	-3.31478	5.55497	4.82885
CD55	All Targets	RNA	Endogenous	1	8	1903	53.5	69.7706	1	1	1604	FALSE	2.66877	7.73516	1.18757	7.6914	5.02307	2.30954e-05	0.0115721	2.69545	8.21192	6.91062
LYZ	All Targets	RNA	Endogenous	1	6	1021	119.5	143.851	1	1	4069	FALSE	4.0987	8.74248	1.20402	8.72566	3.69965	0.000921767	0.0484103	-0.712216	9.11023	8.14882
MUC13	All Targets	RNA	Endogenous	1	8	695	35.5	39.3783	1	1	56667	FALSE	2.28787	6.92973	1.22527	6.872	4.105	0.000310318	0.0313625	0.310883	7.35273	6.15091
MUC3A	All Targets	RNA	Endogenous	1	3	1108	42.5	46.4829	1	1	4584	FALSE	5.37109	7.16904	1.30262	7.11702	2.85808	0.00790477	0.111745	-2.6093	7.4444	6.62596
MUC17	All Targets	RNA	Endogenous	1	2	841	31.5	36.601	1	1	140453	FALSE	2.11855	6.83869	1.44546	6.78011	3.56551	0.00131285	0.0567058	-0.998307	7.1389	6.24192
REG4	All Targets	RNA	Endogenous	1	1	2695	89.5	86.9039	1	1	83998	FALSE	9.19618	8.06911	1.9923	8.02202	2.69926	0.0115869	0.130933	-3.00089	8.83732	6.79907
ZXDA	All Targets	RNA	Endogenous	1	1	36	9.5	7.06417	1	1	7789	FALSE	-0.0702044	4.70531	-0.484817	4.52856	-2.45279	0.016402	0.153294	-3.15881	4.35811	4.78425
EDNRB	All Targets	RNA	Endogenous	1	1	34	10	7.26839	1	1	1910	FALSE	1.13585	4.76245	-0.484805	4.5814	-2.28854	0.0249633	0.183044	-3.53156	4.48925	4.71964
MYL3	All Targets	RNA	Endogenous	1	1	38	11	9.30027	1	1	4634	FALSE	-0.0857369	5.03024	-0.48468	4.89274	-2.60849	0.0108911	0.1288	-2.84987	4.75159	5.10446
S100B	All Targets	RNA	Endogenous	1	1	35	9	6.92303	1	1	6285	FALSE	-0.253237	4.68875	-0.484661	4.50193	-2.42244	0.0177306	0.158564	-3.22243	4.41725	4.62896
CFAP99	All Targets	RNA	Endogenous	1	1	50	11.5	10.584	1	1	402160	FALSE	-0.146232	5.17929	-0.48443	5.05018	-2.66004	0.00947581	0.119751	-2.7602	4.96107	5.18384
TMEM210	All Targets	RNA	Endogenous	1	1	23	8	6.18311	1	1	100505993	FALSE	-0.248973	4.55403	-0.484352	4.34497	-2.41762	0.0179499	0.159576	-3.22331	4.20521	4.5546
LOXL4	All Targets	RNA	Endogenous	1	1	34	13	9.35666	1	1	84171	FALSE	0.026273	5.03701	-0.484313	4.89791	-2.48247	0.0151903	0.148423	-3.13865	4.82307	5.01017
DNASE1L2	All Targets	RNA	Endogenous	1	1	38	11	8.32668	1	1	1775	FALSE	-0.230096	4.89771	-0.484073	4.738	-2.38997	0.0192568	0.163846	-3.31437	4.6526	4.86609
GSX2	All Targets	RNA	Endogenous	1	1	35	10.5	8.26614	1	1	170825	FALSE	0.470653	4.89126	-0.484008	4.73236	-2.41261	0.0181808	0.160286	-3.27517	4.62179	4.89822
CDH13	All Targets	RNA	Endogenous	1	1	31	11.5	8.46243	1	1	1012	FALSE	0.201924	4.92173	-0.483963	4.76426	-2.52375	0.0136382	0.140494	-3.0283	4.64446	4.94398
DDX20	All Targets	RNA	Endogenous	1	1	45	15	10.1041	1	1	11218	FALSE	0.719476	5.13111	-0.483906	5.00011	-2.55742	0.0124795	0.135543	-2.97399	4.86589	5.20143
KCNG1	All Targets	RNA	Endogenous	1	1	29	10.5	7.34879	1	1	3755	FALSE	-0.874813	4.75076	-0.48383	4.57975	-2.6963	0.00858275	0.115276	-2.63515	4.52045	4.66871
HOXB7	All Targets	RNA	Endogenous	1	1	37	12	9.88162	1	1	3217	FALSE	0.0118656	5.09534	-0.483656	4.96095	-2.62183	0.0105075	0.126547	-2.83774	4.91767	5.02587
LECT2	All Targets	RNA	Endogenous	1	1	35	9.5	7.47553	1	1	3950	FALSE	0.00573821	4.78624	-0.483588	4.61529	-2.60319	0.011047	0.129181	-2.85472	4.56922	4.6844
DGKK	All Targets	RNA	Endogenous	1	1	39	12	9.59998	1	1	139189	FALSE	-0.385626	5.07641	-0.48352	4.93721	-2.56711	0.0121629	0.13397	-2.94619	4.78901	5.15952
FASTKD3	All Targets	RNA	Endogenous	1	1	38	12.5	8.74428	1	1	79072	FALSE	0.62039	4.95524	-0.483361	4.80266	-2.6333	0.0101875	0.124923	-2.81546	4.74319	4.89187
FZD9	All Targets	RNA	Endogenous	1	1	32	9.5	7.85416	1	1	8326	FALSE	-0.128627	4.82806	-0.483329	4.6692	-2.627	0.0103621	0.126069	-2.80644	4.55022	4.84766
ZIK1	All Targets	RNA	Endogenous	1	1	35	12	8.64458	1	1	284307	FALSE	-0.428616	4.9467	-0.48309	4.80234	-2.70287	0.00842941	0.114797	-2.62828	4.63972	5.04625
EGR4	All Targets	RNA	Endogenous	1	1	38	10.5	7.15195	1	1	1961	FALSE	-0.592992	4.73835	-0.483078	4.55878	-2.5688	0.0121083	0.133665	-2.92027	4.42186	4.76415
DMD	All Targets	RNA	Endogenous	1	1	37	9	7.09814	1	1	1756	FALSE	0.133147	4.73337	-0.482704	4.55383	-2.63071	0.0102589	0.125293	-2.78589	4.45683	4.69932
OR10V1	All Targets	RNA	Endogenous	1	1	45	9	7.50368	1	1	390201	FALSE	-0.655356	4.77494	-0.482578	4.6069	-2.67187	0.00917552	0.118433	-2.68793	4.48767	4.78573
GRM7	All Targets	RNA	Endogenous	1	1	43	10.5	8.14172	1	1	2917	FALSE	-0.0163763	4.86772	-0.482493	4.71748	-2.56268	0.0123066	0.1347	-2.93872	4.59391	4.90285
RND2	All Targets	RNA	Endogenous	1	1	37	11	7.8306	1	1	8153	FALSE	-0.190118	4.82907	-0.482438	4.66563	-2.55569	0.0125368	0.135819	-2.96003	4.62197	4.73112
IFITM5	All Targets	RNA	Endogenous	1	1	29	9	7.02715	1	1	387733	FALSE	0.853363	4.69566	-0.4824	4.52251	-2.41722	0.0179682	0.159649	-3.25219	4.37716	4.74054
ENPP5	All Targets	RNA	Endogenous	1	1	33	8	6.54477	1	1	59084	FALSE	0.604697	4.62677	-0.48236	4.42918	-2.2262	0.0288914	0.194819	-3.6193	4.30054	4.62213
ADGRV1	All Targets	RNA	Endogenous	1	1	28	9	6.7446	1	1	84059	FALSE	-0.364547	4.66163	-0.48232	4.46605	-2.25593	0.0268693	0.189028	-3.55472	4.326	4.67613
GUCY2F	All Targets	RNA	Endogenous	1	1	32	10	7.05016	1	1	2986	FALSE	0.24059	4.70448	-0.482208	4.52897	-2.47476	0.0154968	0.149305	-3.1244	4.42239	4.68883
TMEM115	All Targets	RNA	Endogenous	1	1	45	9	7.58776	1	1	11070	FALSE	0.950686	4.79761	-0.482148	4.62363	-2.36488	0.0205435	0.16862	-3.37978	4.53962	4.74964
GALNT18	All Targets	RNA	Endogenous	1	1	49	15	9.8381	1	1	374378	FALSE	0.851945	5.11994	-0.482116	4.98215	-2.34931	0.0213454	0.170701	-3.40572	4.77136	5.29834
ZNF80	All Targets	RNA	Endogenous	1	1	45	13	8.57718	1	1	7634	FALSE	1.27619	4.96056	-0.48206	4.80045	-2.47419	0.0155199	0.149305	-3.16211	4.75728	4.8652
MCM9	All Targets	RNA	Endogenous	1	1	41	15	9.94445	1	1	254394	FALSE	0.673542	5.12922	-0.481853	4.99117	-2.32466	0.0229756	0.175014	-3.48231	4.8716	5.17052
LRRTM2	All Targets	RNA	Endogenous	1	1	38	12	9.45839	1	1	26045	FALSE	0.218896	5.0569	-0.481603	4.90402	-2.39519	0.0190504	0.163012	-3.32805	4.83404	5.00898
COL4A2	All Targets	RNA	Endogenous	1	1	48	15	13.7504	1	1	1284	FALSE	-0.460614	5.51503	-0.481575	5.40311	-2.67032	0.00921425	0.118433	-2.73263	5.30694	5.54736
NCKAP1L	All Targets	RNA	Endogenous	1	1	43	11.5	9.3161	1	1	3071	FALSE	-0.644505	5.0343	-0.481343	4.89589	-2.66218	0.00942067	0.119331	-2.72933	4.75826	5.10234
CLDN16	All Targets	RNA	Endogenous	1	1	29	9.5	7.59673	1	1	10686	FALSE	0.0897727	4.78382	-0.481325	4.61527	-2.59719	0.0112259	0.129631	-2.8709	4.56088	4.69687
GDF5	All Targets	RNA	Endogenous	1	1	36	8.5	7.70417	1	1	8200	FALSE	-0.746927	4.80346	-0.48132	4.638	-2.61503	0.0107016	0.127669	-2.8173	4.57922	4.72618
FBXO27	All Targets	RNA	Endogenous	1	1	55	9	8.39171	1	1	126433	FALSE	-0.227899	4.90159	-0.481267	4.74648	-2.74466	0.00751101	0.109199	-2.54702	4.70017	4.81596
TTLL5	All Targets	RNA	Endogenous	1	1	41	10	8.63733	1	1	23093	FALSE	0.391648	4.94069	-0.481099	4.77904	-2.26276	0.0269156	0.189085	-3.6065	4.79262	4.75867
ROR1	All Targets	RNA	Endogenous	1	1	53	14.5	10.3938	1	1	4919	FALSE	-0.547023	5.15632	-0.480978	5.03121	-2.65986	0.00948043	0.119751	-2.73764	4.86489	5.2807
STX1B	All Targets	RNA	Endogenous	1	1	61	12.5	11.907	1	1	112755	FALSE	0.31454	5.33202	-0.480933	5.21376	-2.61992	0.0105617	0.12667	-2.85539	5.09756	5.38805
NECAB1	All Targets	RNA	Endogenous	1	1	41	13	9.07939	1	1	64168	FALSE	0.0713059	5.02933	-0.480819	4.88441	-2.72356	0.00796256	0.112111	-2.60661	4.84749	4.93979
BORCS7	All Targets	RNA	Endogenous	1	1	50	13	10.3273	1	1	119032	FALSE	-0.685345	5.15457	-0.48069	5.03507	-2.89825	0.00486717	0.0937775	-2.17361	4.87781	5.27095
KRT84	All Targets	RNA	Endogenous	1	1	32	10.5	8.00678	1	1	3890	FALSE	0.526049	4.85654	-0.480658	4.69594	-2.39438	0.0190431	0.163012	-3.29899	4.60928	4.82593
SLC52A1	All Targets	RNA	Endogenous	1	1	26	8	7.1152	1	1	55065	FALSE	-0.174287	4.70076	-0.480651	4.51382	-2.26441	0.0263189	0.186989	-3.53048	4.38223	4.71122
ADAMTSL2	All Targets	RNA	Endogenous	1	1	32	12	9.19469	1	1	9719	FALSE	0.0232597	5.00594	-0.480584	4.86847	-2.70659	0.00834364	0.114277	-2.63864	4.74966	5.04667
ZNF665	All Targets	RNA	Endogenous	1	1	45	14	9.92856	1	1	79788	FALSE	0.218241	5.12357	-0.480425	4.98829	-2.59165	0.0113934	0.130158	-2.89135	4.79014	5.28552
ARGFX	All Targets	RNA	Endogenous	1	1	43	11	7.58145	1	1	503582	FALSE	-0.0653484	4.80029	-0.480346	4.63194	-2.51627	0.0139081	0.141866	-3.03645	4.51974	4.80023
MAGEC1	All Targets	RNA	Endogenous	1	1	24	9	6.40978	1	1	9947	FALSE	0.210599	4.5889	-0.480222	4.39521	-2.57962	0.0117648	0.13174	-2.89568	4.27028	4.58261
LYPD3	All Targets	RNA	Endogenous	1	1	40	11	9.14312	1	1	27076	FALSE	0.735876	5.01058	-0.480125	4.8666	-2.30364	0.024056	0.17938	-3.51087	4.7358	5.06281
DENND6B	All Targets	RNA	Endogenous	1	1	84	14	11.0797	1	1	414918	FALSE	0.650541	5.24318	-0.47989	5.13087	-2.52945	0.0134352	0.139599	-3.05127	4.94164	5.41471
MIIP	All Targets	RNA	Endogenous	1	1	52	14	10.0964	1	1	60672	FALSE	-0.951501	5.12439	-0.479851	4.99959	-2.81879	0.00610354	0.0994541	-2.36866	4.87048	5.19325
SUCNR1	All Targets	RNA	Endogenous	1	1	29	9.5	6.99703	1	1	56670	FALSE	-0.0617113	4.69996	-0.479701	4.51776	-2.29243	0.02457	0.181117	-3.48066	4.41232	4.67593
C10orf99	All Targets	RNA	Endogenous	1	1	37	9.5	7.12459	1	1	387695	FALSE	0.801488	4.75271	-0.479596	4.5562	-2.33062	0.0223562	0.172759	-3.43956	4.44089	4.72916
MCHR1	All Targets	RNA	Endogenous	1	1	41	10	7.40715	1	1	2847	FALSE	0.180999	4.77141	-0.479595	4.59947	-2.31166	0.02343	0.177501	-3.46304	4.53327	4.69876
ATP1A4	All Targets	RNA	Endogenous	1	1	29	8.5	7.11685	1	1	480	FALSE	0.177645	4.71449	-0.479594	4.5244	-2.41513	0.0180644	0.159977	-3.25168	4.38729	4.73007
TEX10	All Targets	RNA	Endogenous	1	3	47	12.5	10.8187	1	1	54881	FALSE	0.134087	5.20656	-0.479554	5.06769	-2.50566	0.0142996	0.1438	-3.09421	4.93471	5.26717
CAMK2B	All Targets	RNA	Endogenous	1	1	33	11	7.62928	1	1	816	FALSE	0.427483	4.79998	-0.479484	4.62616	-2.49888	0.014555	0.145776	-3.09247	4.56109	4.72377
ALOX15B	All Targets	RNA	Endogenous	1	1	31	9	6.56948	1	1	247	FALSE	-0.481804	4.63167	-0.479346	4.4412	-2.32865	0.0224625	0.173153	-3.3988	4.32034	4.62248
RNASE7	All Targets	RNA	Endogenous	1	1	47	12	8.8128	1	1	84659	FALSE	-0.0662416	4.97159	-0.479079	4.82567	-2.5476	0.0128077	0.136663	-2.98471	4.72924	4.97031
NXPH2	All Targets	RNA	Endogenous	1	1	57	9	7.29067	1	1	11249	FALSE	0.218367	4.74158	-0.479077	4.56859	-2.47479	0.0154957	0.149305	-3.1344	4.52558	4.6331
ACSM5	All Targets	RNA	Endogenous	1	1	40	12	8.87412	1	1	54988	FALSE	0.966141	4.9862	-0.478961	4.82956	-2.31076	0.0234826	0.177602	-3.47193	4.66453	5.07712
GKN2	All Targets	RNA	Endogenous	1	1	28	10.5	7.73006	1	1	200504	FALSE	0.515246	4.80813	-0.478941	4.62848	-2.25274	0.0270806	0.189333	-3.57644	4.47382	4.86048
DOC2A	All Targets	RNA	Endogenous	1	1	44	13	8.98462	1	1	8448	FALSE	-0.359902	4.99832	-0.47871	4.85214	-2.51642	0.0139029	0.141866	-3.0388	4.72516	5.04261
GPR85	All Targets	RNA	Endogenous	1	1	36	11.5	8.4378	1	1	54329	FALSE	-0.504725	4.91507	-0.478454	4.76307	-2.52594	0.0135599	0.139927	-3.02507	4.64569	4.93913
SFRP5	All Targets	RNA	Endogenous	1	1	151	8.5	7.14501	1	1	6425	FALSE	0.653779	4.72888	-0.478124	4.54759	-2.33996	0.0218379	0.172495	-3.39585	4.49313	4.62928
ZC2HC1B	All Targets	RNA	Endogenous	1	1	44	10.5	8.08867	1	1	153918	FALSE	0.350203	4.8715	-0.478053	4.70809	-2.31971	0.0229673	0.175014	-3.45412	4.59431	4.87877
XYLT2	All Targets	RNA	Endogenous	1	1	54	13	10.4341	1	1	64132	FALSE	-1.47505	5.17118	-0.478018	5.04482	-2.80151	0.0064081	0.100688	-2.42583	4.96446	5.16536
SOX21	All Targets	RNA	Endogenous	1	1	55	12.5	10.1062	1	1	11166	FALSE	-0.366459	5.13528	-0.477976	5.00201	-2.50675	0.014259	0.143676	-3.07862	4.82158	5.27266
PBOV1	All Targets	RNA	Endogenous	1	1	25	7	5.44173	1	1	59351	FALSE	-0.504431	4.42941	-0.477857	4.1911	-2.43369	0.0172272	0.157243	-3.19814	4.14356	4.26242
MXRA8	All Targets	RNA	Endogenous	1	1	54	12.5	11.0084	1	1	54587	FALSE	-0.113865	5.24243	-0.477848	5.11646	-2.44906	0.0165602	0.153885	-3.20804	4.94031	5.38067
OR10J1	All Targets	RNA	Endogenous	1	1	47	10.5	8.37604	1	1	26476	FALSE	0.0910897	4.90287	-0.477728	4.75167	-2.47774	0.0153776	0.148995	-3.11721	4.66571	4.88062
ADAL	All Targets	RNA	Endogenous	1	1	31	10	7.08573	1	1	161823	FALSE	-0.811972	4.70738	-0.47767	4.53035	-2.53849	0.0131193	0.13781	-2.98422	4.44232	4.66239
OR6V1	All Targets	RNA	Endogenous	1	1	47	10	8.60658	1	1	346517	FALSE	-0.166581	4.9363	-0.477226	4.7866	-2.58465	0.0116082	0.130943	-2.90415	4.66748	4.96526
ALDH1L1	All Targets	RNA	Endogenous	1	1	101	14.5	11.7975	1	1	10840	FALSE	0.918266	5.32528	-0.477214	5.21118	-2.41374	0.0184746	0.16091	-3.33461	5.12522	5.34013
MELK	All Targets	RNA	Endogenous	1	1	35	10.5	7.88612	1	1	9833	FALSE	0.189456	4.82363	-0.477194	4.65598	-2.3968	0.0189264	0.162569	-3.29588	4.58565	4.76147
CDC23	All Targets	RNA	Endogenous	1	1	43	14.5	9.96945	1	1	8697	FALSE	0.234338	5.12223	-0.477012	4.98846	-2.48859	0.0149503	0.146905	-3.11768	4.79728	5.27522
SLIT1	All Targets	RNA	Endogenous	1	1	34	11	7.9064	1	1	6585	FALSE	0.89525	4.85804	-0.476953	4.69425	-2.27696	0.0255353	0.185109	-3.53949	4.60449	4.82888
STAB2	All Targets	RNA	Endogenous	1	1	36	12.5	8.18155	1	1	55576	FALSE	-0.175257	4.9	-0.476813	4.74218	-2.43042	0.0173721	0.157542	-3.241	4.62061	4.92454
UNCX	All Targets	RNA	Endogenous	1	1	28	9.5	6.99107	1	1	340260	FALSE	0.160003	4.69293	-0.476761	4.50831	-2.32808	0.0224942	0.17325	-3.42467	4.35186	4.74299
NOTCH3	All Targets	RNA	Endogenous	1	2	52	12	13.4298	1	1	4854	FALSE	0.919603	5.49199	-0.476699	5.35754	-2.55684	0.0124985	0.135569	-3.00381	5.38643	5.31421
ZNF253	All Targets	RNA	Endogenous	1	1	41	10	8.74187	1	1	56242	FALSE	0.218632	4.95533	-0.47667	4.81029	-2.52348	0.0136477	0.140512	-3.03893	4.66601	5.02671
H3C7	All Targets	RNA	Endogenous	1	1	44	11	8.9414	1	1	8968	FALSE	-0.664391	4.97139	-0.476648	4.82672	-2.63182	0.0102285	0.12527	-2.80189	4.7626	4.92288
AKR1B1	All Targets	RNA	Endogenous	1	2	42	11.5	10.9633	1	1	231	FALSE	0.592305	5.22251	-0.476445	5.08889	-2.24847	0.0277751	0.191468	-3.63005	4.97138	5.26514
OR1A1	All Targets	RNA	Endogenous	1	1	43	12	9.18356	1	1	8383	FALSE	-0.316898	5.02474	-0.476305	4.88316	-2.66193	0.00942716	0.119331	-2.74138	4.78726	5.02702
LIPK	All Targets	RNA	Endogenous	1	1	38	14	10.8066	1	1	643414	FALSE	-0.685145	5.21418	-0.476267	5.09726	-2.85038	0.00558098	0.0976173	-2.31131	4.9886	5.26025
MICU3	All Targets	RNA	Endogenous	1	1	35	10.5	7.62064	1	1	286097	FALSE	0.655132	4.78728	-0.476247	4.62144	-2.26612	0.0262093	0.186863	-3.54261	4.36547	5.00539
SIGLEC7	All Targets	RNA	Endogenous	1	1	34	10	7.93229	1	1	27036	FALSE	-0.275522	4.82949	-0.476222	4.66265	-2.43348	0.0172363	0.157243	-3.20986	4.56175	4.814
GLRB	All Targets	RNA	Endogenous	1	1	37	9	7.25328	1	1	2743	FALSE	0.275333	4.74189	-0.476221	4.56448	-2.33461	0.0221311	0.172751	-3.41821	4.40975	4.79656
CHRNA9	All Targets	RNA	Endogenous	1	1	38	10	7.73679	1	1	55584	FALSE	0.268339	4.81495	-0.476162	4.64852	-2.54584	0.0128675	0.136663	-2.98621	4.56306	4.77672
HLA-DQA1	All Targets	RNA	Endogenous	1	1	36	12	9.15561	1	1	3117	FALSE	0.45802	5.02929	-0.476066	4.86462	-2.33927	0.0219615	0.172695	-3.44264	4.7612	5.01974
MAP10	All Targets	RNA	Endogenous	1	1	38	13	10.0502	1	1	54627	FALSE	-0.405145	5.1154	-0.476048	4.98221	-2.67398	0.00912282	0.118217	-2.70979	4.9002	5.10523
TMEM53	All Targets	RNA	Endogenous	1	1	34	11.5	8.80739	1	1	79639	FALSE	-0.428085	4.95446	-0.475997	4.81343	-2.59347	0.0113381	0.129934	-2.88037	4.68653	5.00377
CXorf65	All Targets	RNA	Endogenous	1	1	27	8.5	6.94741	1	1	158830	FALSE	0.460959	4.68771	-0.475965	4.50897	-2.30647	0.0237335	0.178302	-3.4713	4.42649	4.6327
SUCLA2	All Targets	RNA	Endogenous	1	1	34	13	8.19173	1	1	8803	FALSE	0.00555938	4.88019	-0.475907	4.72755	-2.45752	0.0162035	0.152466	-3.18517	4.62903	4.87534
ANTXR1	All Targets	RNA	Endogenous	1	1	50	13.5	10.7512	1	1	84168	FALSE	0.279306	5.21293	-0.475842	5.09559	-2.46102	0.0160574	0.152044	-3.19683	4.98673	5.25887
GMNC	All Targets	RNA	Endogenous	1	1	33	9	6.77981	1	1	647309	FALSE	0.0381537	4.68215	-0.475808	4.49012	-2.37925	0.019786	0.166118	-3.32411	4.37227	4.6669
RCVRN	All Targets	RNA	Endogenous	1	1	37	12	8.3218	1	1	5957	FALSE	0.0209935	4.90537	-0.475789	4.74553	-2.41821	0.0179229	0.159572	-3.25048	4.62344	4.92867
KIRREL2	All Targets	RNA	Endogenous	1	1	90	13	10.8284	1	1	84063	FALSE	-0.167632	5.22401	-0.475707	5.09712	-2.70988	0.00826834	0.113614	-2.63876	5.06363	5.14735
OR13C4	All Targets	RNA	Endogenous	1	1	37	9	7.71678	1	1	138804	FALSE	0.0294539	4.82738	-0.475705	4.65649	-2.55792	0.0124631	0.135543	-2.95074	4.5258	4.85253
ZNF14	All Targets	RNA	Endogenous	1	1	33	14	9.7118	1	1	7561	FALSE	-0.241656	5.08167	-0.475681	4.94773	-2.61159	0.0108008	0.128467	-2.85614	4.80932	5.15535
VIT	All Targets	RNA	Endogenous	1	1	37	12.5	9.83564	1	1	5212	FALSE	0.283085	5.10741	-0.475665	4.97017	-2.33863	0.0220045	0.172751	-3.44552	4.82689	5.1851
LRR1	All Targets	RNA	Endogenous	1	1	31	10	8.19816	1	1	122769	FALSE	0.171794	4.87082	-0.475425	4.70932	-2.60622	0.0109576	0.1288	-2.85876	4.67952	4.75403
NOTO	All Targets	RNA	Endogenous	1	1	37	11	8.73372	1	1	344022	FALSE	-0.0979148	4.94932	-0.475375	4.7987	-2.52067	0.0137487	0.141039	-3.04503	4.71398	4.92578
FAM181A	All Targets	RNA	Endogenous	1	1	44	11.5	8.06036	1	1	90050	FALSE	0.223595	4.86336	-0.475314	4.70594	-2.47534	0.0154738	0.149305	-3.1475	4.64379	4.79917
ITIH2	All Targets	RNA	Endogenous	1	1	40	13.5	10.2998	1	1	3698	FALSE	-0.373847	5.15281	-0.475299	5.02655	-2.61993	0.0105615	0.12667	-2.8451	4.91839	5.1888
FZD8	All Targets	RNA	Endogenous	1	1	46	10.5	8.11073	1	1	8325	FALSE	-0.409313	4.86567	-0.475159	4.70313	-2.56102	0.012361	0.135212	-2.94796	4.60237	4.85427
OR14I1	All Targets	RNA	Endogenous	1	1	45	10	8.0541	1	1	401994	FALSE	0.209473	4.87094	-0.475142	4.70902	-2.43082	0.0173545	0.157542	-3.23394	4.6226	4.83863
TCF24	All Targets	RNA	Endogenous	1	1	39	12	9.2189	1	1	100129654	FALSE	-0.21709	5.01605	-0.475138	4.87301	-2.5461	0.0128586	0.136663	-2.98565	4.73711	5.07685
URM1	All Targets	RNA	Endogenous	1	2	93	14	12.6269	1	1	81605	FALSE	0.201421	5.399	-0.475097	5.28319	-2.57469	0.0119214	0.132379	-2.97714	5.33758	5.20159
MACROD2	All Targets	RNA	Endogenous	1	1	56	13	8.26244	1	1	140733	FALSE	-0.424838	4.89985	-0.475009	4.74388	-2.43174	0.0173134	0.157368	-3.21514	4.59649	4.96497
YRDC	All Targets	RNA	Endogenous	1	1	59	11.5	10.0665	1	1	79693	FALSE	0.496721	5.12684	-0.474889	4.98448	-2.33959	0.021858	0.172549	-3.42416	4.96979	5.00653
CCDC39	All Targets	RNA	Endogenous	1	1	29	10	6.851	1	1	339829	FALSE	0.0164017	4.67623	-0.474793	4.49287	-2.52094	0.0137389	0.141039	-3.03672	4.42015	4.60194
AQP4	All Targets	RNA	Endogenous	1	1	38	11.5	8.31034	1	1	361	FALSE	-0.154691	4.90334	-0.474755	4.75339	-2.67254	0.00915886	0.118433	-2.70316	4.68655	4.85364
NRK	All Targets	RNA	Endogenous	1	1	30	9.5	6.84655	1	1	203447	FALSE	-0.0293628	4.67243	-0.474752	4.49359	-2.5541	0.0125897	0.136147	-2.95413	4.38931	4.65
TMIGD3	All Targets	RNA	Endogenous	1	1	27	9	7.3157	1	1	57413	FALSE	-0.059438	4.74013	-0.474692	4.568	-2.5348	0.0132475	0.138688	-3.00843	4.43776	4.76337
RINL	All Targets	RNA	Endogenous	1	1	36	11.5	8.32098	1	1	126432	FALSE	-0.388708	4.9062	-0.474668	4.74881	-2.4605	0.0160791	0.15209	-3.161	4.57569	5.00849
METTL25	All Targets	RNA	Endogenous	1	1	31	12.5	9.19052	1	1	84190	FALSE	-0.0325985	5.02119	-0.474634	4.87884	-2.52761	0.0135005	0.139776	-3.03369	4.76831	5.04462
ZNF169	All Targets	RNA	Endogenous	1	1	32	11.5	9.3132	1	1	169841	FALSE	-0.0879203	5.02529	-0.474579	4.88836	-2.67483	0.00910179	0.118114	-2.70319	4.80025	5.02052
SLAMF8	All Targets	RNA	Endogenous	1	1	36	12	8.7816	1	1	56833	FALSE	-0.103496	4.96782	-0.474362	4.819	-2.48949	0.0149156	0.146905	-3.10947	4.73231	4.94904
OTUD7A	All Targets	RNA	Endogenous	1	1	44	14	11.6178	1	1	161725	FALSE	0.559938	5.31373	-0.474297	5.19685	-2.47156	0.0157348	0.150251	-3.20522	5.1302	5.29682
TRIM63	All Targets	RNA	Endogenous	1	1	20	6.5	5.03999	1	1	84676	FALSE	0.0406203	4.32783	-0.474288	4.0798	-2.2741	0.025702	0.185765	-3.50593	3.96117	4.25775
EPHA6	All Targets	RNA	Endogenous	1	1	41	12	7.90966	1	1	285220	FALSE	0.453815	4.8557	-0.474186	4.68227	-2.37807	0.0198453	0.166291	-3.33296	4.57049	4.84994
DEPDC1B	All Targets	RNA	Endogenous	1	1	46	10	7.86908	1	1	55789	FALSE	0.105372	4.8306	-0.474172	4.66947	-2.40715	0.0184353	0.16091	-3.2716	4.57923	4.80484
LGI4	All Targets	RNA	Endogenous	1	1	33	8	6.30774	1	1	163175	FALSE	-0.0725426	4.57227	-0.473877	4.37188	-2.28522	0.0250101	0.183238	-3.51364	4.32879	4.43652
ULBP1	All Targets	RNA	Endogenous	1	1	43	13.5	9.65245	1	1	80329	FALSE	0.0810105	5.09383	-0.47379	4.95601	-2.58776	0.0115124	0.130686	-2.91192	4.83308	5.14039
RANBP3L	All Targets	RNA	Endogenous	1	1	30	10.5	8.30321	1	1	202151	FALSE	0.446412	4.90275	-0.473588	4.74152	-2.50866	0.0141882	0.143408	-3.06553	4.57963	4.98435
FBXL7	All Targets	RNA	Endogenous	1	1	33	11	7.86154	1	1	23194	FALSE	0.845115	4.84424	-0.473534	4.68151	-2.31085	0.0234773	0.177602	-3.47657	4.56161	4.86134
GPR148	All Targets	RNA	Endogenous	1	1	39	9.5	7.85092	1	1	344561	FALSE	-0.877703	4.82882	-0.473524	4.66853	-2.54405	0.0129284	0.136915	-2.981	4.5522	4.84302
OR10A3	All Targets	RNA	Endogenous	1	1	34	13.5	9.121	1	1	26496	FALSE	-0.433274	5.02221	-0.473432	4.87446	-2.59595	0.0112633	0.129653	-2.87777	4.75526	5.05325
SPATA9	All Targets	RNA	Endogenous	1	1	34	13.5	9.39165	1	1	83890	FALSE	0.459468	5.04288	-0.473429	4.90491	-2.42888	0.0174407	0.157542	-3.25497	4.76206	5.11917
SLAMF9	All Targets	RNA	Endogenous	1	1	31	10	8.14753	1	1	89886	FALSE	0.0542914	4.8676	-0.473236	4.70585	-2.41997	0.0178428	0.159128	-3.25583	4.67702	4.7491
LYPD6B	All Targets	RNA	Endogenous	1	1	140	15.5	10.6475	1	1	130576	FALSE	0.605129	5.24488	-0.473045	5.10709	-2.31324	0.0233402	0.176969	-3.47721	4.8572	5.48193
POSTN	All Targets	RNA	Endogenous	1	1	86	16.5	12.3485	1	1	10631	FALSE	1.02269	5.38287	-0.47294	5.27034	-2.30163	0.0244954	0.180937	-3.55009	5.11204	5.5078
VNN3	All Targets	RNA	Endogenous	1	1	31	8.5	7.38301	1	1	55350	FALSE	0.00640285	4.74983	-0.472917	4.57834	-2.49168	0.0148306	0.146583	-3.08979	4.55726	4.60996
MIPOL1	All Targets	RNA	Endogenous	1	1	40	10.5	9.05146	1	1	145282	FALSE	-0.090905	5.01016	-0.4729	4.85464	-2.30618	0.0237502	0.178302	-3.47865	4.73118	5.03984
MND1	All Targets	RNA	Endogenous	1	1	32	11.5	8.95009	1	1	84057	FALSE	-0.57129	4.98682	-0.472851	4.83721	-2.48054	0.0152664	0.148771	-3.12842	4.71153	5.02572
PZP	All Targets	RNA	Endogenous	1	1	38	12	7.3416	1	1	5858	FALSE	0.281572	4.77962	-0.472799	4.59994	-2.4891	0.0149308	0.146905	-3.09943	4.454	4.81884
RAG2	All Targets	RNA	Endogenous	1	1	29	9	6.34502	1	1	5897	FALSE	0.392839	4.58523	-0.472732	4.38482	-2.24398	0.0276617	0.191015	-3.58038	4.2868	4.53184
TRDC	All Targets	RNA	Endogenous	1	1	45	11	7.56905	1	1	28526	FALSE	0.453747	4.81356	-0.472724	4.62576	-2.22132	0.0293118	0.196083	-3.6514	4.50162	4.81198
PLCL1	All Targets	RNA	Endogenous	1	1	42	11.5	9.22747	1	1	5334	FALSE	-0.0875511	5.01418	-0.472703	4.87399	-2.46476	0.0159035	0.151541	-3.17524	4.79158	4.99762
LRTOMT	All Targets	RNA	Endogenous	1	1	74	13.5	10.039	1	1	220074	FALSE	0.483839	5.12695	-0.472468	4.9963	-2.47235	0.0155939	0.149539	-3.15782	4.83902	5.23222
KIF20A	All Targets	RNA	Endogenous	1	1	35	8	6.39366	1	1	10112	FALSE	-0.607373	4.59495	-0.472415	4.39585	-2.37996	0.0197509	0.16599	-3.29786	4.22552	4.65134
OBP2B	All Targets	RNA	Endogenous	1	1	48	11	8.63705	1	1	29989	FALSE	-0.0325875	4.94494	-0.47231	4.7939	-2.33605	0.0220517	0.172751	-3.42607	4.69043	4.94912
ALKAL2	All Targets	RNA	Endogenous	1	1	37	9	7.24952	1	1	285016	FALSE	0.342246	4.74174	-0.472278	4.56644	-2.39633	0.0189492	0.162588	-3.28823	4.41059	4.80021
WTIP	All Targets	RNA	Endogenous	1	1	32	11	8.27766	1	1	126374	FALSE	0.02197	4.9085	-0.472164	4.7497	-2.40423	0.0185727	0.161238	-3.2844	4.59395	4.98332
RGSL1	All Targets	RNA	Endogenous	1	1	37	9.5	7.27683	1	1	353299	FALSE	-0.290533	4.74744	-0.472163	4.56911	-2.36251	0.0206381	0.168754	-3.35919	4.49478	4.68061
SLC5A3	All Targets	RNA	Endogenous	1	1	29	11.5	7.19085	1	1	6526	FALSE	0.164954	4.73842	-0.471863	4.55734	-2.23498	0.0283008	0.19271	-3.62048	4.47886	4.67506
OR2Y1	All Targets	RNA	Endogenous	1	1	33	8	6.52918	1	1	134083	FALSE	-0.0963356	4.61318	-0.471824	4.41951	-2.34644	0.021487	0.170701	-3.37398	4.30231	4.59533
CMTM7	All Targets	RNA	Endogenous	1	1	44	14	11.3899	1	1	112616	FALSE	-0.0473696	5.26951	-0.471806	5.15316	-2.50995	0.0141402	0.143132	-3.08803	5.001	5.3814
MAPK4	All Targets	RNA	Endogenous	1	1	46	12.5	10.232	1	1	5596	FALSE	0.124162	5.15473	-0.471565	5.02742	-2.65245	0.00967294	0.121012	-2.76447	4.91814	5.19135
KCNH5	All Targets	RNA	Endogenous	1	1	30	9.5	6.9755	1	1	27133	FALSE	-0.00500774	4.71179	-0.471515	4.52246	-2.46013	0.0160946	0.152157	-3.16077	4.43956	4.64682
MAPK12	All Targets	RNA	Endogenous	1	1	37	14.5	11.0096	1	1	6300	FALSE	0.0522994	5.23164	-0.471392	5.10756	-2.81229	0.00621663	0.099931	-2.42585	5.09647	5.1242
ARSA	All Targets	RNA	Endogenous	1	1	41	17	11.8016	1	1	410	FALSE	0.541692	5.32897	-0.47128	5.21658	-2.63117	0.0102463	0.125293	-2.83342	5.0769	5.42609
ZNF347	All Targets	RNA	Endogenous	1	1	46	12.5	8.6967	1	1	84671	FALSE	-0.323185	4.95192	-0.471261	4.80717	-2.55001	0.0127266	0.136563	-2.97482	4.72947	4.9237
SLC22A9	All Targets	RNA	Endogenous	1	1	38	9.5	7.51005	1	1	114571	FALSE	0.89381	4.78156	-0.470984	4.6051	-2.47569	0.0154595	0.149282	-3.14789	4.60585	4.60399
KIAA1586	All Targets	RNA	Endogenous	1	1	29	7.5	6.55091	1	1	57691	FALSE	0.0852075	4.62344	-0.470966	4.42149	-2.42412	0.0176545	0.158276	-3.2324	4.38323	4.47888
SHPRH	All Targets	RNA	Endogenous	1	1	45	12.5	10.174	1	1	257218	FALSE	0.248643	5.13564	-0.470905	5.00125	-2.51975	0.0137817	0.141124	-3.05855	4.9578	5.06641
IL17B	All Targets	RNA	Endogenous	1	1	23	8	6.1289	1	1	27190	FALSE	0.0685386	4.54377	-0.470631	4.33869	-2.4231	0.0177004	0.15851	-3.21663	4.20119	4.54493
BLOC1S2	All Targets	RNA	Endogenous	1	1	49	14.5	11.0967	1	1	282991	FALSE	0.657248	5.24547	-0.470552	5.12411	-2.29808	0.0244708	0.180904	-3.53941	4.99285	5.32099
AXDND1	All Targets	RNA	Endogenous	1	1	40	13.5	9.66404	1	1	126859	FALSE	0.310033	5.08448	-0.470508	4.94617	-2.446	0.0166914	0.154717	-3.21745	4.89756	5.01909
IGSF1	All Targets	RNA	Endogenous	1	1	26	9	6.77206	1	1	3547	FALSE	0.482776	4.65702	-0.470418	4.47131	-2.26476	0.0262966	0.186989	-3.55454	4.34486	4.66098
SLC45A2	All Targets	RNA	Endogenous	1	1	31	10.5	7.12483	1	1	51151	FALSE	1.0008	4.7321	-0.470387	4.55401	-2.24478	0.027608	0.191015	-3.59522	4.34823	4.86267
TBCE	All Targets	RNA	Endogenous	1	1	44	11	8.70753	1	1	6905	FALSE	-0.199923	4.94785	-0.470352	4.79691	-2.36636	0.0204396	0.168354	-3.36487	4.76618	4.843
PERM1	All Targets	RNA	Endogenous	1	1	60	14.5	9.47203	1	1	84808	FALSE	0.61939	5.06647	-0.47014	4.93008	-2.34637	0.0214904	0.170701	-3.41931	4.75898	5.18674
PLCH2	All Targets	RNA	Endogenous	1	1	45	11.5	9.68482	1	1	9651	FALSE	0.110927	5.08281	-0.470079	4.95495	-2.55736	0.0124813	0.135543	-2.97926	4.78384	5.21161
HTR2C	All Targets	RNA	Endogenous	1	1	36	8.5	7.73071	1	1	3358	FALSE	0.503377	4.8124	-0.469686	4.64841	-2.39908	0.0188172	0.162016	-3.28023	4.45936	4.93198
C1orf146	All Targets	RNA	Endogenous	1	1	25	10	6.84343	1	1	388649	FALSE	-0.0929125	4.65977	-0.469543	4.48167	-2.51343	0.0140121	0.142475	-3.04652	4.40673	4.59408
LZTR1	All Targets	RNA	Endogenous	1	1	57	16.5	12.9706	1	1	8216	FALSE	-0.775899	5.43292	-0.468992	5.3319	-2.94966	0.00419486	0.0881898	-2.08034	5.25224	5.45138
APCS	All Targets	RNA	Endogenous	1	1	39	12	9.02305	1	1	325	FALSE	0.946223	5.0063	-0.46899	4.8565	-2.27333	0.0258035	0.186008	-3.5627	4.7358	5.03756
JCHAIN	All Targets	RNA	Endogenous	1	1	55	10	8.42154	1	1	3512	FALSE	0.067294	4.9103	-0.468984	4.7617	-2.33653	0.0220257	0.172751	-3.42	4.62092	4.97287
ANHX	All Targets	RNA	Endogenous	1	1	37	9	7.37388	1	1	647589	FALSE	0.206475	4.75521	-0.468942	4.58544	-2.45177	0.0164452	0.15346	-3.18034	4.49697	4.71813
RGMA	All Targets	RNA	Endogenous	1	1	44	9.5	7.61699	1	1	56963	FALSE	-0.311693	4.7932	-0.46893	4.62701	-2.45324	0.016383	0.153294	-3.16414	4.47251	4.85877
KLF10	All Targets	RNA	Endogenous	1	4	55	18	16.2713	1	1	7071	FALSE	0.810256	5.72438	-0.468807	5.62317	-2.645	0.00987038	0.122534	-2.81416	5.59114	5.67121
CRNN	All Targets	RNA	Endogenous	1	1	23	7	5.74302	1	1	49860	FALSE	-0.188337	4.45919	-0.468706	4.24717	-2.36699	0.020407	0.168322	-3.33159	4.16964	4.36348
CER1	All Targets	RNA	Endogenous	1	1	33	11	7.32254	1	1	9350	FALSE	-0.0642536	4.7415	-0.468688	4.57728	-2.49812	0.0145838	0.145839	-3.07743	4.51704	4.66763
SPATA12	All Targets	RNA	Endogenous	1	2	103	24	22.961	1	1	353324	FALSE	0.136003	6.17936	-0.468676	6.12088	-3.025	0.00336358	0.080344	-1.93214	5.94804	6.38013
ROPN1L	All Targets	RNA	Endogenous	1	1	35	9.5	7.25498	1	1	83853	FALSE	0.707533	4.74574	-0.468525	4.57265	-2.32587	0.0226184	0.173613	-3.43439	4.45087	4.75534
TRIM67	All Targets	RNA	Endogenous	1	1	32	11	7.9185	1	1	440730	FALSE	0.387171	4.8541	-0.468503	4.69225	-2.32557	0.0226352	0.173668	-3.45648	4.61391	4.80976
SIRPG	All Targets	RNA	Endogenous	1	1	36	12	8.27163	1	1	55423	FALSE	0.350531	4.88978	-0.468343	4.73923	-2.45945	0.0161228	0.152331	-3.17128	4.68498	4.82059
NENF	All Targets	RNA	Endogenous	1	3	56	14.5	15.7056	1	1	29937	FALSE	0.0387111	5.67623	-0.468241	5.5758	-2.98316	0.00380418	0.08421	-2.01441	5.58311	5.56484
PPBP	All Targets	RNA	Endogenous	1	1	37	12.5	8.73623	1	1	5473	FALSE	0.168422	4.96327	-0.468197	4.818	-2.5763	0.0118695	0.13202	-2.94212	4.8047	4.83794
ZNF425	All Targets	RNA	Endogenous	1	1	41	12	9.61677	1	1	155054	FALSE	0.0740586	5.06947	-0.468169	4.92969	-2.45516	0.0163021	0.152996	-3.19677	4.90083	4.97297
CD52	All Targets	RNA	Endogenous	1	1	41	12.5	8.0521	1	1	1043	FALSE	-0.82589	4.87298	-0.468156	4.71183	-2.54227	0.0129893	0.137148	-2.98635	4.57724	4.91372
CA11	All Targets	RNA	Endogenous	1	1	44	11.5	8.03758	1	1	770	FALSE	-0.0944964	4.88381	-0.468091	4.71459	-2.57628	0.01187	0.13202	-2.91425	4.60301	4.88196
LMNTD1	All Targets	RNA	Endogenous	1	1	47	11	8.85473	1	1	160492	FALSE	-0.167832	4.97779	-0.467233	4.8279	-2.55196	0.0126611	0.136428	-2.97563	4.73357	4.96941
MCOLN2	All Targets	RNA	Endogenous	1	1	27	11	7.4452	1	1	255231	FALSE	-0.16909	4.75953	-0.467118	4.59012	-2.37983	0.0197572	0.16599	-3.32633	4.46434	4.77878
OR4C13	All Targets	RNA	Endogenous	1	1	47	11	7.86928	1	1	283092	FALSE	0.333611	4.85966	-0.467045	4.6942	-2.26738	0.0261302	0.186788	-3.56543	4.54321	4.92068
IL4I1	All Targets	RNA	Endogenous	1	3	181	36	30.3228	1	1	259307	FALSE	-0.182289	6.55734	-0.466802	6.50827	-3.29372	0.00148669	0.0581616	-1.255	6.36705	6.72009
OR10AC1	All Targets	RNA	Endogenous	1	1	30	10	7.03579	1	1	392133	FALSE	0.539524	4.70411	-0.466458	4.52151	-2.23391	0.0283461	0.192894	-3.60717	4.37804	4.73671
PROX2	All Targets	RNA	Endogenous	1	1	31	11	7.64107	1	1	283571	FALSE	0.262824	4.8022	-0.466191	4.63673	-2.35313	0.0211298	0.170316	-3.3759	4.50315	4.8371
FGFBP1	All Targets	RNA	Endogenous	1	1	37	13	9.17005	1	1	9982	FALSE	-0.223763	5.02053	-0.466017	4.87855	-2.47805	0.0153652	0.148995	-3.14652	4.81255	4.97756
GUCA1B	All Targets	RNA	Endogenous	1	1	47	13.5	9.50884	1	1	2979	FALSE	-0.720258	5.05853	-0.465753	4.92842	-2.76501	0.00709767	0.106845	-2.50232	4.86751	5.0198
OR2AE1	All Targets	RNA	Endogenous	1	1	37	10	7.72219	1	1	81392	FALSE	-0.0220894	4.82041	-0.46563	4.65265	-2.41077	0.0182662	0.160638	-3.26353	4.56808	4.7795
SCEL	All Targets	RNA	Endogenous	1	1	57	14	12.253	1	1	8796	FALSE	0.518159	5.36803	-0.465505	5.25825	-2.46209	0.0160134	0.151946	-3.20772	5.06	5.55563
CHIA	All Targets	RNA	Endogenous	1	1	32	10.5	8.11791	1	1	27159	FALSE	0.292646	4.86275	-0.465359	4.69976	-2.29788	0.0242425	0.179879	-3.49876	4.53505	4.94683
UTP18	All Targets	RNA	Endogenous	1	1	80	20	16.5238	1	1	51096	FALSE	-0.240136	5.74544	-0.465296	5.662	-2.82645	0.00597285	0.0992066	-2.39938	5.57206	5.79689
SPINK7	All Targets	RNA	Endogenous	1	1	44	8	6.7517	1	1	84651	FALSE	-0.278368	4.64961	-0.465182	4.47176	-2.33565	0.0220736	0.172751	-3.39237	4.27054	4.77358
GRM1	All Targets	RNA	Endogenous	1	1	67	11	8.74326	1	1	2911	FALSE	1.24762	4.98262	-0.465147	4.82824	-2.28039	0.0254493	0.184823	-3.56794	4.82422	4.83427
BRINP1	All Targets	RNA	Endogenous	1	1	44	11	8.09461	1	1	1620	FALSE	-0.778287	4.8641	-0.465031	4.70738	-2.56603	0.0121978	0.134223	-2.93256	4.64517	4.8007
CARD16	All Targets	RNA	Endogenous	1	1	36	14	9.30456	1	1	114769	FALSE	0.615828	5.03548	-0.465009	4.89029	-2.30451	0.0238483	0.178793	-3.48857	4.74663	5.10578
OR13G1	All Targets	RNA	Endogenous	1	1	33	11.5	8.10542	1	1	441933	FALSE	-0.00525881	4.86956	-0.464983	4.71141	-2.52024	0.0137642	0.141067	-3.04037	4.55662	4.9436
NPFFR2	All Targets	RNA	Endogenous	1	1	32	11	7.61572	1	1	10886	FALSE	0.762977	4.83218	-0.464714	4.64922	-2.25315	0.0270538	0.189332	-3.59293	4.53178	4.82539
GPR62	All Targets	RNA	Endogenous	1	1	43	9.5	7.23153	1	1	118442	FALSE	0.35541	4.73104	-0.464698	4.56472	-2.35193	0.0211935	0.170471	-3.37857	4.45913	4.72309
CCN2	All Targets	RNA	Endogenous	1	2	75	16.5	15.3483	1	1	1490	FALSE	0.955221	5.6573	-0.464404	5.55673	-2.5455	0.012879	0.136663	-3.03759	5.51796	5.6149
CCDC160	All Targets	RNA	Endogenous	1	1	24	9	6.98463	1	1	347475	FALSE	-0.338389	4.68629	-0.46433	4.50138	-2.24552	0.0275585	0.19097	-3.59431	4.37726	4.68755
SPTSSB	All Targets	RNA	Endogenous	1	1	64	13	9.22702	1	1	165679	FALSE	0.106697	5.02243	-0.464212	4.88255	-2.44203	0.0168625	0.155657	-3.21791	4.79304	5.01682
WEE1	All Targets	RNA	Endogenous	1	2	63	17.5	13.2868	1	1	7465	FALSE	0.997438	5.47188	-0.464143	5.36017	-2.52316	0.0136677	0.140618	-3.09596	5.4163	5.27597
QTRT2	All Targets	RNA	Endogenous	1	1	55	12.5	10.415	1	1	79691	FALSE	0.193436	5.16576	-0.464069	5.03977	-2.4179	0.017937	0.159576	-3.28524	5.02713	5.05875
TRMT2B	All Targets	RNA	Endogenous	1	1	41	12	9.95709	1	1	79979	FALSE	-0.106026	5.10843	-0.463856	4.97249	-2.54548	0.0128799	0.136663	-2.98781	4.8261	5.19208
SMIM21	All Targets	RNA	Endogenous	1	1	34	10	7.52125	1	1	284274	FALSE	-0.483695	4.77232	-0.463849	4.60465	-2.58493	0.0115995	0.130933	-2.89295	4.49843	4.76398
PCED1B	All Targets	RNA	Endogenous	1	1	32	12	10.5531	1	1	91523	FALSE	0.480672	5.17504	-0.463802	5.03996	-2.40982	0.0183102	0.160638	-3.28189	4.93418	5.19863
OR1M1	All Targets	RNA	Endogenous	1	1	46	13.5	9.1753	1	1	125963	FALSE	0.0329152	5.02605	-0.463779	4.88699	-2.47702	0.0154064	0.149089	-3.1399	4.74655	5.09765
ZMAT5	All Targets	RNA	Endogenous	1	1	63	16	10.8487	1	1	55954	FALSE	0.00253451	5.22337	-0.463747	5.10284	-2.36151	0.0206902	0.169027	-3.39639	4.92799	5.36512
C4orf36	All Targets	RNA	Endogenous	1	1	27	11	8.14014	1	1	132989	FALSE	0.80926	4.8811	-0.463731	4.71756	-2.32531	0.0226499	0.173671	-3.46049	4.69937	4.74486
CLCA1	All Targets	RNA	Endogenous	1	1	34	12.5	10.3211	1	1	1179	FALSE	-0.156183	5.14651	-0.463728	5.02449	-2.64795	0.0097918	0.121894	-2.7817	4.88632	5.23174
HELT	All Targets	RNA	Endogenous	1	1	35	9.5	7.30917	1	1	391723	FALSE	0.645435	4.75002	-0.463661	4.57616	-2.38207	0.0196456	0.165775	-3.31625	4.50348	4.68519
OR6N2	All Targets	RNA	Endogenous	1	1	31	12	8.67054	1	1	81442	FALSE	0.278826	4.95377	-0.463573	4.80646	-2.54213	0.012994	0.137148	-3.00192	4.66328	5.02123
DMXL2	All Targets	RNA	Endogenous	1	1	43	10	8.42185	1	1	23312	FALSE	0.416406	4.91191	-0.463435	4.76169	-2.29504	0.0244129	0.180697	-3.51899	4.67887	4.88593
CCNA1	All Targets	RNA	Endogenous	1	1	30	11	8.34734	1	1	8900	FALSE	-0.0119417	4.89203	-0.463415	4.73654	-2.48029	0.0152763	0.148787	-3.13355	4.6407	4.8803
RAPSN	All Targets	RNA	Endogenous	1	1	51	14.5	10.0353	1	1	5913	FALSE	0.766283	5.13496	-0.463287	4.99965	-2.45259	0.0164104	0.153294	-3.22086	4.96363	5.05369
AHDC1	All Targets	RNA	Endogenous	1	1	53	10	9.01524	1	1	27245	FALSE	-0.760607	4.98378	-0.463174	4.83772	-2.50489	0.0143286	0.143908	-3.08406	4.77981	4.9246
CAMKK2	All Targets	RNA	Endogenous	1	2	71	19	14.2081	1	1	10645	FALSE	-0.402998	5.54412	-0.463154	5.44938	-2.84587	0.005653	0.0976173	-2.35508	5.41284	5.50419
ARTN	All Targets	RNA	Endogenous	1	1	36	10	7.5212	1	1	9048	FALSE	0.034204	4.77454	-0.46308	4.61138	-2.35175	0.021203	0.170471	-3.39328	4.50968	4.76393
DUSP23	All Targets	RNA	Endogenous	1	1	40	8	7.63405	1	1	54935	FALSE	-0.212367	4.79239	-0.463073	4.615	-2.38414	0.0195434	0.165426	-3.31889	4.55404	4.70645
PRTG	All Targets	RNA	Endogenous	1	1	41	11.5	8.61066	1	1	283659	FALSE	0.552272	4.93943	-0.463039	4.7968	-2.48227	0.0151978	0.148423	-3.12783	4.68119	4.97021
KCNJ5	All Targets	RNA	Endogenous	1	1	33	10	8.60063	1	1	3762	FALSE	0.0558285	4.92515	-0.462977	4.77752	-2.45289	0.0163981	0.153294	-3.19062	4.65553	4.96052
PIGW	All Targets	RNA	Endogenous	1	1	43	13	10.3571	1	1	284098	FALSE	0.17705	5.16472	-0.462961	5.03319	-2.44422	0.0167679	0.155187	-3.21757	4.90775	5.22135
AMIGO1	All Targets	RNA	Endogenous	1	1	39	9.5	8.38601	1	1	57463	FALSE	0.146709	4.90097	-0.462891	4.7399	-2.45478	0.0163183	0.153068	-3.18697	4.6397	4.8902
ADCY10	All Targets	RNA	Endogenous	1	1	25	8	6.6325	1	1	55811	FALSE	0.0707816	4.63422	-0.462891	4.44062	-2.29625	0.0243399	0.180305	-3.49297	4.37811	4.53437
CHST2	All Targets	RNA	Endogenous	1	1	29	10	6.90595	1	1	9435	FALSE	-0.159077	4.68559	-0.46271	4.50386	-2.49807	0.0145858	0.145839	-3.07172	4.44412	4.59346
CDH12	All Targets	RNA	Endogenous	1	1	36	10	7.78466	1	1	1010	FALSE	-0.468254	4.81185	-0.462504	4.65109	-2.52988	0.0134202	0.139524	-3.0206	4.56172	4.78516
PXDNL	All Targets	RNA	Endogenous	1	1	36	12	7.48511	1	1	137902	FALSE	-0.0137064	4.78678	-0.462397	4.61659	-2.41144	0.0182352	0.160609	-3.26221	4.46783	4.83974
PIAS4	All Targets	RNA	Endogenous	1	1	57	16	12.9794	1	1	51588	FALSE	-0.380929	5.43909	-0.462298	5.34279	-2.82061	0.00607226	0.0992631	-2.40194	5.27878	5.43881
KMO	All Targets	RNA	Endogenous	1	1	35	12.5	8.62401	1	1	8564	FALSE	-0.00563624	4.93987	-0.462271	4.79091	-2.59864	0.0111825	0.129631	-2.86405	4.6275	5.03603
NAT14	All Targets	RNA	Endogenous	1	1	37	14.5	9.32779	1	1	57106	FALSE	-0.0641573	5.04288	-0.46216	4.90227	-2.77123	0.00697563	0.105825	-2.48855	4.8518	4.97797
CHL1	All Targets	RNA	Endogenous	1	1	35	13.5	9.52181	1	1	10752	FALSE	-0.0163738	5.06839	-0.462063	4.9152	-2.26864	0.0260596	0.186716	-3.57161	4.81618	5.06372
C9orf43	All Targets	RNA	Endogenous	1	1	41	9.5	7.35012	1	1	257169	FALSE	0.0133832	4.7746	-0.462034	4.59075	-2.47645	0.0154292	0.149149	-3.14127	4.52959	4.68249
CENPA	All Targets	RNA	Endogenous	1	1	37	12.5	9.24774	1	1	1058	FALSE	-0.125015	5.02133	-0.461928	4.88167	-2.40706	0.0184394	0.16091	-3.28283	4.72579	5.11549
SLC47A1	All Targets	RNA	Endogenous	1	1	34	9.5	7.36752	1	1	55244	FALSE	-0.47089	4.76898	-0.461822	4.59228	-2.36707	0.0204031	0.168322	-3.34431	4.44583	4.81195
CDC20B	All Targets	RNA	Endogenous	1	1	30	9	7.85374	1	1	166979	FALSE	-0.581226	4.81716	-0.461805	4.65861	-2.53124	0.0133724	0.139289	-3.00437	4.54303	4.83199
KLHL3	All Targets	RNA	Endogenous	1	1	31	13.5	8.59596	1	1	26249	FALSE	0.0793566	4.92242	-0.461673	4.77717	-2.34576	0.0215237	0.170752	-3.4008	4.6715	4.93568
NR4A3	All Targets	RNA	Endogenous	1	2	76	13.5	11.4561	1	1	8013	FALSE	0.187566	5.2774	-0.461579	5.15303	-2.64137	0.00996775	0.12338	-2.8269	5.20758	5.07122
SERPINI2	All Targets	RNA	Endogenous	1	1	38	10	7.56955	1	1	5276	FALSE	0.0141515	4.79576	-0.461485	4.62552	-2.47892	0.0153307	0.148968	-3.11498	4.51314	4.79409
ZNF182	All Targets	RNA	Endogenous	1	1	51	16	11.708	1	1	7569	FALSE	0.087042	5.31226	-0.46138	5.19809	-2.43536	0.0171538	0.157102	-3.24993	5.02994	5.45032
OXLD1	All Targets	RNA	Endogenous	1	1	71	15	11.3176	1	1	339229	FALSE	0.101028	5.26884	-0.461188	5.15246	-2.40719	0.0184333	0.16091	-3.31163	5.04767	5.30966
MZB1	All Targets	RNA	Endogenous	1	1	45	11.5	7.8261	1	1	51237	FALSE	0.0334576	4.84168	-0.46108	4.6726	-2.36437	0.0205419	0.16862	-3.35197	4.50322	4.92668
TMEM247	All Targets	RNA	Endogenous	1	1	42	11	8.19592	1	1	388946	FALSE	1.31849	4.89456	-0.461027	4.72922	-2.36795	0.020358	0.168294	-3.36149	4.73351	4.72278
SMKR1	All Targets	RNA	Endogenous	1	1	32	9.5	7.74075	1	1	100287482	FALSE	0.000929583	4.82184	-0.460921	4.64886	-2.28804	0.0248374	0.182532	-3.50585	4.53652	4.81737
GP1BA	All Targets	RNA	Endogenous	1	1	38	11	8.44809	1	1	2811	FALSE	0.226225	4.92085	-0.460913	4.76697	-2.2311	0.0285396	0.193387	-3.62877	4.66328	4.92249
GML	All Targets	RNA	Endogenous	1	1	43	14	8.84666	1	1	2765	FALSE	0.0637065	4.9919	-0.460851	4.83564	-2.28339	0.0252262	0.184295	-3.56293	4.77105	4.93251
COL6A6	All Targets	RNA	Endogenous	1	1	35	12	8.37803	1	1	131873	FALSE	0.561043	4.90203	-0.460842	4.74953	-2.34869	0.0213662	0.170701	-3.39385	4.56518	5.02605
ITGA2B	All Targets	RNA	Endogenous	1	1	35	10.5	8.27489	1	1	3674	FALSE	0.54985	4.88788	-0.460666	4.73379	-2.2553	0.0269106	0.189085	-3.59049	4.65177	4.85681
KDM4D	All Targets	RNA	Endogenous	1	1	51	14	9.29589	1	1	55693	FALSE	-0.257509	5.05563	-0.46066	4.9119	-2.40351	0.0186066	0.161436	-3.30307	4.7704	5.12414
ERP27	All Targets	RNA	Endogenous	1	1	49	10.5	9.37889	1	1	121506	FALSE	0.291239	5.04128	-0.460595	4.90331	-2.40514	0.0185295	0.161155	-3.28431	4.70127	5.20637
SOWAHD	All Targets	RNA	Endogenous	1	1	45	11.5	9.1921	1	1	347454	FALSE	0.257952	5.02216	-0.460535	4.87589	-2.42156	0.0177703	0.158841	-3.25661	4.73101	5.0932
SPATA31E1	All Targets	RNA	Endogenous	1	1	32	11	8.89043	1	1	286234	FALSE	-1.1838	4.97141	-0.460434	4.83182	-2.61602	0.0106731	0.127413	-2.83311	4.75113	4.95287
C1orf232	All Targets	RNA	Endogenous	1	1	33	10.5	8.07008	1	1	110806296	FALSE	0.101268	4.86313	-0.460401	4.71016	-2.47264	0.0155823	0.149539	-3.13834	4.53811	4.96824
TAAR9	All Targets	RNA	Endogenous	1	1	40	10.5	7.87222	1	1	134860	FALSE	0.323908	4.83232	-0.460382	4.67696	-2.48898	0.0149351	0.146905	-3.09561	4.54808	4.87028
COL26A1	All Targets	RNA	Endogenous	1	1	26	8.5	6.41194	1	1	136227	FALSE	0.412296	4.58799	-0.460338	4.39455	-2.23673	0.0281529	0.192138	-3.59492	4.30038	4.53579
TCEAL7	All Targets	RNA	Endogenous	1	1	35	13	9.04525	1	1	56849	FALSE	0.0517343	5.00841	-0.460333	4.8578	-2.35908	0.0208168	0.169446	-3.40027	4.75152	5.01722
CKAP5	All Targets	RNA	Endogenous	1	1	35	12.5	8.84126	1	1	9793	FALSE	0.0257463	4.96134	-0.460227	4.81743	-2.35171	0.0212054	0.170471	-3.40098	4.70174	4.99095
SLC22A24	All Targets	RNA	Endogenous	1	1	56	16	10.2936	1	1	283238	FALSE	0.232122	5.18045	-0.460199	5.04334	-2.57824	0.0118082	0.131886	-2.93799	4.93938	5.19927
XAGE5	All Targets	RNA	Endogenous	1	1	40	11	8.39349	1	1	170627	FALSE	0.518869	4.91584	-0.460177	4.75938	-2.27271	0.0258109	0.186008	-3.56878	4.71144	4.83129
KCNJ15	All Targets	RNA	Endogenous	1	1	44	10.5	9.10795	1	1	3772	FALSE	0.216461	5.00616	-0.459735	4.85003	-2.36602	0.0204571	0.168354	-3.36364	4.73711	5.01941
WDR49	All Targets	RNA	Endogenous	1	1	27	10	7.3807	1	1	151790	FALSE	-0.275583	4.75119	-0.459562	4.5857	-2.54884	0.012766	0.13666	-2.96294	4.42087	4.83295
ITGB3	All Targets	RNA	Endogenous	1	1	39	10.5	8.35086	1	1	3690	FALSE	-0.251482	4.90537	-0.459558	4.74821	-2.41485	0.0180772	0.159998	-3.25274	4.65608	4.8864
KRT222	All Targets	RNA	Endogenous	1	1	44	14.5	9.26701	1	1	125113	FALSE	0.622373	5.0559	-0.459276	4.9064	-2.41645	0.0180035	0.159738	-3.27873	4.82091	5.03463
HHLA1	All Targets	RNA	Endogenous	1	1	23	9	6.19933	1	1	10086	FALSE	0.260578	4.55985	-0.459249	4.3615	-2.21376	0.0297592	0.197796	-3.64721	4.24361	4.53834
EXD3	All Targets	RNA	Endogenous	1	1	34	9.5	8.92627	1	1	54932	FALSE	0.571334	4.97825	-0.459163	4.83088	-2.51001	0.0141381	0.143132	-3.08012	4.73454	4.97537
ARHGAP23	All Targets	RNA	Endogenous	1	2	40	9	9.06664	1	1	57636	FALSE	0.317648	4.99174	-0.459092	4.83051	-2.43099	0.0173466	0.157542	-3.23432	4.7931	4.88662
PXYLP1	All Targets	RNA	Endogenous	1	1	41	12.5	8.95164	1	1	92370	FALSE	-0.10826	4.9871	-0.45899	4.84137	-2.32668	0.0225724	0.173482	-3.45589	4.65864	5.11546
BMP15	All Targets	RNA	Endogenous	1	1	27	9.5	6.7965	1	1	9210	FALSE	0.596656	4.67828	-0.458977	4.49156	-2.27147	0.025868	0.186091	-3.53796	4.37029	4.67345
CCNF	All Targets	RNA	Endogenous	1	1	49	12.5	9.83193	1	1	899	FALSE	-0.711192	5.09226	-0.458966	4.95666	-2.48853	0.0149527	0.146905	-3.11638	4.82605	5.15257
TPO	All Targets	RNA	Endogenous	1	1	50	14.5	9.72704	1	1	7173	FALSE	-0.705843	5.09345	-0.458639	4.96288	-2.69046	0.00872112	0.116269	-2.67571	4.84413	5.14101
CD300H	All Targets	RNA	Endogenous	1	1	25	9.5	6.76816	1	1	100130520	FALSE	-0.327856	4.65485	-0.458612	4.47198	-2.52625	0.0135487	0.139927	-3.01096	4.37962	4.61051
C16orf86	All Targets	RNA	Endogenous	1	1	29	7.5	6.46988	1	1	388284	FALSE	-0.196915	4.58928	-0.458565	4.39677	-2.48751	0.0149923	0.147134	-3.10772	4.34293	4.47752
RPP25	All Targets	RNA	Endogenous	1	1	54	13	12.0223	1	1	54913	FALSE	-0.365096	5.33376	-0.458489	5.22132	-2.62195	0.0105041	0.126547	-2.85512	5.185	5.2758
FAT4	All Targets	RNA	Endogenous	1	1	30	10	7.59642	1	1	79633	FALSE	-0.0629841	4.79295	-0.458385	4.61956	-2.23687	0.0281432	0.192138	-3.6038	4.51107	4.7823
VRK3	All Targets	RNA	Endogenous	1	2	81	17.5	14.323	1	1	51231	FALSE	0.197061	5.55601	-0.458345	5.45509	-2.66008	0.00947477	0.119751	-2.81182	5.52471	5.35066
SEZ6L2	All Targets	RNA	Endogenous	1	1	56	11.5	9.11838	1	1	26470	FALSE	0.00995314	5.00617	-0.458095	4.86235	-2.36569	0.0204739	0.168354	-3.3719	4.79782	4.95914
STUM	All Targets	RNA	Endogenous	1	1	34	10	7.14057	1	1	375057	FALSE	0.164277	4.72442	-0.458063	4.5463	-2.40319	0.0186218	0.16149	-3.2718	4.4798	4.64606
APOBEC3G	All Targets	RNA	Endogenous	1	1	52	11	8.65529	1	1	60489	FALSE	-0.690143	4.93722	-0.45801	4.7918	-2.52539	0.0135793	0.140048	-3.02991	4.71806	4.90241
PMCH	All Targets	RNA	Endogenous	1	1	28	9.5	6.90537	1	1	5367	FALSE	0.293073	4.70711	-0.457918	4.51347	-2.37388	0.0200562	0.167051	-3.34792	4.43963	4.62423
BUB1	All Targets	RNA	Endogenous	1	1	32	12.5	9.01128	1	1	699	FALSE	0.066881	5.00293	-0.457774	4.85762	-2.33468	0.0221271	0.172751	-3.44278	4.74313	5.02934
MARCHF10	All Targets	RNA	Endogenous	1	1	33	10	7.90118	1	1	162333	FALSE	-0.158985	4.82474	-0.457641	4.66462	-2.37193	0.0201546	0.167326	-3.3319	4.50827	4.89916
SELENOK	All Targets	RNA	Endogenous	1	2	32	14	13.0348	1	1	58515	FALSE	-0.193878	5.43567	-0.457538	5.32412	-2.43621	0.0171175	0.156973	-3.26936	5.28421	5.384
WRAP53	All Targets	RNA	Endogenous	1	1	40	14	8.39165	1	1	55135	FALSE	0.0669965	4.91126	-0.457351	4.75567	-2.47239	0.0155923	0.149539	-3.13969	4.65352	4.90889
TULP4	All Targets	RNA	Endogenous	1	1	42	11	10.4302	1	1	56995	FALSE	-0.634125	5.15041	-0.457215	5.02719	-2.80856	0.0062823	0.099931	-2.41094	4.92883	5.17472
DSN1	All Targets	RNA	Endogenous	1	1	39	12	8.45701	1	1	79980	FALSE	-0.343876	4.91799	-0.456997	4.7668	-2.50496	0.0143259	0.143908	-3.08358	4.69098	4.88053
ZFP28	All Targets	RNA	Endogenous	1	1	28	10	7.17834	1	1	140612	FALSE	0.501443	4.72627	-0.456983	4.55398	-2.23529	0.0282515	0.192447	-3.60368	4.37505	4.82237
ATPSCKMT	All Targets	RNA	Endogenous	1	1	57	14	9.92319	1	1	134145	FALSE	0.3028	5.10449	-0.456975	4.97265	-2.40845	0.0183741	0.16079	-3.2968	4.81815	5.20439
ACP4	All Targets	RNA	Endogenous	1	1	47	11.5	8.75988	1	1	93650	FALSE	0.669792	4.95982	-0.456318	4.80958	-2.2672	0.026146	0.186788	-3.57998	4.76667	4.87395
C12orf29	All Targets	RNA	Endogenous	1	1	46	14.5	9.77749	1	1	91298	FALSE	-0.0824395	5.09349	-0.45623	4.96351	-2.43028	0.0173782	0.157542	-3.24957	4.87756	5.09245
CDK5	All Targets	RNA	Endogenous	1	2	39	10	8.06574	1	1	1020	FALSE	-0.441305	4.84352	-0.456199	4.67423	-2.52053	0.0137536	0.141039	-3.03232	4.60539	4.77748
ASB10	All Targets	RNA	Endogenous	1	1	43	15	10.1723	1	1	136371	FALSE	-0.145529	5.1417	-0.45601	5.01676	-2.5776	0.0118284	0.131948	-2.94581	4.96093	5.10049
TPSD1	All Targets	RNA	Endogenous	1	1	34	11	8.41231	1	1	23430	FALSE	0.315734	4.92126	-0.455995	4.76469	-2.27372	0.0257257	0.185765	-3.54425	4.66493	4.91435
TSPAN16	All Targets	RNA	Endogenous	1	1	25	8.5	6.40887	1	1	26526	FALSE	-0.138209	4.59697	-0.455925	4.3948	-2.23979	0.0279448	0.191468	-3.59402	4.32666	4.49702
TGM6	All Targets	RNA	Endogenous	1	1	26	9.5	6.95896	1	1	343641	FALSE	0.0873804	4.69415	-0.455819	4.50822	-2.21911	0.0293779	0.196339	-3.64132	4.41335	4.65052
ELF5	All Targets	RNA	Endogenous	1	1	41	13	9.96975	1	1	2001	FALSE	-0.3663	5.1154	-0.455814	4.982	-2.49793	0.014591	0.145839	-3.10151	4.86484	5.15773
HAS1	All Targets	RNA	Endogenous	1	1	40	10	7.91999	1	1	3036	FALSE	0.308233	4.84188	-0.455754	4.68223	-2.27526	0.0256292	0.185663	-3.54664	4.54441	4.88896
SMCO1	All Targets	RNA	Endogenous	1	1	44	13	8.17315	1	1	255798	FALSE	-0.04079	4.88695	-0.455634	4.73404	-2.40485	0.0185434	0.161198	-3.27227	4.53821	5.02778
ZNF850	All Targets	RNA	Endogenous	1	1	35	11.5	8.75899	1	1	342892	FALSE	0.322292	4.95725	-0.455452	4.80422	-2.38262	0.0196183	0.165749	-3.33334	4.6833	4.9856
DNAH6	All Targets	RNA	Endogenous	1	1	41	10.5	8.39684	1	1	1768	FALSE	0.0923691	4.90956	-0.455338	4.75523	-2.28543	0.0249971	0.183217	-3.5235	4.61973	4.95847
ZIC5	All Targets	RNA	Endogenous	1	1	36	9.5	7.79363	1	1	85416	FALSE	-0.0814727	4.81176	-0.455306	4.6558	-2.37604	0.0199469	0.16673	-3.32777	4.55944	4.80035
FER1L5	All Targets	RNA	Endogenous	1	1	43	12.5	10.0191	1	1	90342	FALSE	0.0991828	5.11605	-0.455259	4.98433	-2.41972	0.017854	0.159128	-3.28056	4.92607	5.07172
MEGF10	All Targets	RNA	Endogenous	1	1	44	13	8.31651	1	1	84466	FALSE	0.503833	4.91471	-0.455216	4.75716	-2.26655	0.0261814	0.186812	-3.56701	4.5988	4.9947
VCAM1	All Targets	RNA	Endogenous	1	1	37	13	10.0305	1	1	7412	FALSE	-0.146246	5.11545	-0.455209	4.97858	-2.39967	0.0187892	0.161937	-3.30395	4.89454	5.10465
KIRREL1	All Targets	RNA	Endogenous	1	1	43	9.5	8.14946	1	1	55243	FALSE	-0.240593	4.87264	-0.454947	4.70771	-2.22919	0.028672	0.193993	-3.62944	4.62093	4.83788
COL9A1	All Targets	RNA	Endogenous	1	1	32	10	7.68926	1	1	1297	FALSE	-0.0910966	4.80996	-0.454849	4.64795	-2.37119	0.0201925	0.1674	-3.35011	4.60787	4.70808
DCD	All Targets	RNA	Endogenous	1	1	41	11	8.31611	1	1	117159	FALSE	0.493831	4.90006	-0.454844	4.7414	-2.30627	0.0237448	0.178302	-3.48643	4.65094	4.87708
ITK	All Targets	RNA	Endogenous	1	1	36	12	8.93428	1	1	3702	FALSE	0.250111	4.99179	-0.454719	4.84334	-2.34118	0.0217711	0.17224	-3.43591	4.81206	4.89026
BTC	All Targets	RNA	Endogenous	1	1	62	12.5	10.5616	1	1	685	FALSE	0.209545	5.17752	-0.45453	5.06051	-2.71835	0.00807789	0.112668	-2.62097	4.89554	5.30796
KLK9	All Targets	RNA	Endogenous	1	1	37	12	11.0394	1	1	284366	FALSE	0.60293	5.23505	-0.454478	5.09888	-2.40444	0.018563	0.161238	-3.3007	5.02726	5.20631
CNFN	All Targets	RNA	Endogenous	1	1	30	10.5	8.01104	1	1	84518	FALSE	-0.0312361	4.84725	-0.454434	4.68929	-2.37188	0.0201574	0.167326	-3.35585	4.57749	4.85699
RBP3	All Targets	RNA	Endogenous	1	1	34	10.5	7.56047	1	1	5949	FALSE	-0.259639	4.77698	-0.454386	4.61316	-2.45804	0.0161817	0.152466	-3.16241	4.46916	4.82916
ZSCAN18	All Targets	RNA	Endogenous	1	1	39	13.5	9.91516	1	1	65982	FALSE	-0.410039	5.10592	-0.454322	4.9742	-2.62177	0.0105093	0.126547	-2.83207	4.85393	5.15462
ATP6V0C	All Targets	RNA	Endogenous	1	4	144	35	31.5775	1	1	527	FALSE	0.666484	6.60722	-0.454242	6.56167	-2.85512	0.00550627	0.0972486	-2.3872	6.42442	6.76754
SV2B	All Targets	RNA	Endogenous	1	1	30	10	7.84197	1	1	9899	FALSE	0.0136173	4.82641	-0.454149	4.66259	-2.36932	0.0202878	0.167826	-3.36122	4.6271	4.71584
ZNF514	All Targets	RNA	Endogenous	1	1	38	13	9.34357	1	1	84874	FALSE	0.0595988	5.02527	-0.453858	4.88352	-2.42929	0.0174224	0.157542	-3.25904	4.81821	4.98149
PTPN7	All Targets	RNA	Endogenous	1	1	40	12.5	10.1237	1	1	5778	FALSE	0.199597	5.13337	-0.453804	4.99352	-2.36503	0.0205081	0.168531	-3.3866	4.91906	5.1052
IYD	All Targets	RNA	Endogenous	1	2	39	15.5	12.4768	1	1	389434	FALSE	-0.434401	5.3867	-0.453077	5.27743	-2.68638	0.00881907	0.117043	-2.71542	5.22106	5.36198
C16orf90	All Targets	RNA	Endogenous	1	1	36	9.5	7.86446	1	1	646174	FALSE	0.357408	4.8238	-0.453043	4.66376	-2.37097	0.0202034	0.1674	-3.36217	4.68833	4.6269
RUNDC3A	All Targets	RNA	Endogenous	1	1	30	10	6.97003	1	1	10900	FALSE	0.714953	4.70538	-0.453009	4.52938	-2.31276	0.0233663	0.177093	-3.47226	4.43089	4.67711
CYRIA	All Targets	RNA	Endogenous	1	1	29	8.5	6.82329	1	1	81553	FALSE	0.171433	4.67447	-0.452902	4.49333	-2.40855	0.0183699	0.16079	-3.25267	4.37463	4.67138
KRTAP24-1	All Targets	RNA	Endogenous	1	1	42	12.5	8.66951	1	1	643803	FALSE	-0.178178	4.96502	-0.452899	4.81591	-2.536	0.0132058	0.138411	-3.01145	4.71295	4.97034
C17orf97	All Targets	RNA	Endogenous	1	1	34	10.5	9.43722	1	1	400566	FALSE	0.62527	5.04371	-0.452891	4.89245	-2.24006	0.0279268	0.191468	-3.62484	4.80543	5.02298
NLRP7	All Targets	RNA	Endogenous	1	1	37	9.5	8.18484	1	1	199713	FALSE	0.112105	4.8793	-0.452827	4.71724	-2.22672	0.0288431	0.19464	-3.64184	4.63866	4.8351
KRTAP8-1	All Targets	RNA	Endogenous	1	1	39	10	8.12627	1	1	337879	FALSE	0.131077	4.86368	-0.452757	4.70459	-2.31644	0.0231542	0.175707	-3.46818	4.62358	4.82609
PABPC3	All Targets	RNA	Endogenous	1	1	36	11.5	8.20698	1	1	5042	FALSE	0.122851	4.88235	-0.452669	4.72073	-2.32043	0.0229261	0.174933	-3.46539	4.66041	4.81122
ADGRG1	All Targets	RNA	Endogenous	1	4	128	25	22.9772	1	1	9289	FALSE	0.154602	6.17545	-0.452553	6.11265	-2.76956	0.00700822	0.106052	-2.5549	5.97236	6.3231
SLC36A2	All Targets	RNA	Endogenous	1	1	26	8	6.7633	1	1	153201	FALSE	-0.299041	4.65373	-0.452427	4.45954	-2.28041	0.0253076	0.184295	-3.51226	4.36152	4.60657
ACTR8	All Targets	RNA	Endogenous	1	1	38	12	10.4135	1	1	93973	FALSE	-0.080929	5.16215	-0.452179	5.02775	-2.39847	0.0188465	0.16218	-3.32641	4.97052	5.1136
NTRK1	All Targets	RNA	Endogenous	1	1	29	10	7.64416	1	1	4914	FALSE	-0.00326958	4.79418	-0.452139	4.62843	-2.25501	0.0269297	0.189085	-3.58044	4.47041	4.86546
TAS2R5	All Targets	RNA	Endogenous	1	1	38	13	9.50427	1	1	54429	FALSE	-0.736186	5.0441	-0.45208	4.91189	-2.60222	0.0110756	0.129309	-2.88472	4.8321	5.03159
CPEB1	All Targets	RNA	Endogenous	1	1	40	10.5	8.0077	1	1	64506	FALSE	-0.599157	4.86875	-0.451524	4.70679	-2.46402	0.0159339	0.151671	-3.15219	4.56776	4.91535
OR6C2	All Targets	RNA	Endogenous	1	1	23	7.5	6.65691	1	1	341416	FALSE	-0.333956	4.62422	-0.451356	4.44336	-2.35758	0.0208956	0.169858	-3.3563	4.30945	4.64423
HTRA2	All Targets	RNA	Endogenous	1	1	41	12	10.6891	1	1	27429	FALSE	-0.365516	5.18903	-0.451316	5.06951	-2.33823	0.0219323	0.172682	-3.43429	4.92528	5.28586
KRTAP20-1	All Targets	RNA	Endogenous	1	1	35	9	7.02898	1	1	337975	FALSE	-0.282135	4.71164	-0.451084	4.52737	-2.3919	0.019163	0.163232	-3.3097	4.49894	4.57002
GPR108	All Targets	RNA	Endogenous	1	1	99	19	14.2297	1	1	56927	FALSE	-0.204538	5.55514	-0.451076	5.46546	-2.57675	0.0118551	0.13202	-2.97036	5.34738	5.64259
RBM10	All Targets	RNA	Endogenous	1	1	46	14	10.6873	1	1	8241	FALSE	-0.705376	5.19192	-0.451032	5.07325	-2.57205	0.0120043	0.133087	-2.94288	4.94218	5.26986
TAGLN3	All Targets	RNA	Endogenous	1	1	42	12	9.42728	1	1	29114	FALSE	0.292373	5.04057	-0.450907	4.90431	-2.41534	0.0180548	0.159977	-3.27584	4.82436	5.02422
DCSTAMP	All Targets	RNA	Endogenous	1	1	41	10.5	7.96643	1	1	81501	FALSE	0.866102	4.85769	-0.450824	4.69466	-2.21022	0.0300139	0.198748	-3.66892	4.56333	4.89165
CLDN1	All Targets	RNA	Endogenous	1	2	121	24.5	21.7059	1	1	9076	FALSE	1.09283	6.10294	-0.450568	6.0384	-2.66508	0.00934679	0.118953	-2.81336	5.89173	6.25842
MYOM2	All Targets	RNA	Endogenous	1	1	48	11.5	8.15582	1	1	9172	FALSE	-0.0738253	4.88272	-0.450472	4.72911	-2.51398	0.013992	0.142407	-3.06432	4.67388	4.81194
CALCA	All Targets	RNA	Endogenous	1	1	22	7.5	5.65231	1	1	796	FALSE	0.175096	4.45941	-0.450461	4.23637	-2.2456	0.0275531	0.19097	-3.57692	4.13944	4.38178
SSMEM1	All Targets	RNA	Endogenous	1	1	33	11	8.22399	1	1	136263	FALSE	-0.266634	4.8855	-0.450372	4.73543	-2.40859	0.0183679	0.16079	-3.27937	4.56687	4.98826
NOX4	All Targets	RNA	Endogenous	1	1	27	9.5	7.35178	1	1	50507	FALSE	-0.343061	4.75227	-0.450343	4.58276	-2.43996	0.0169525	0.156123	-3.203	4.42821	4.81459
CDC14A	All Targets	RNA	Endogenous	1	1	43	11	8.71672	1	1	8556	FALSE	-0.413549	4.94642	-0.450221	4.79551	-2.42669	0.0175388	0.158024	-3.24361	4.73706	4.88319
HOXA13	All Targets	RNA	Endogenous	1	1	37	13	8.64508	1	1	3209	FALSE	0.433438	4.96019	-0.450132	4.8104	-2.54918	0.0127544	0.13666	-3.003	4.76581	4.87728
LYPD5	All Targets	RNA	Endogenous	1	1	37	12	8.62609	1	1	284348	FALSE	-0.518682	4.94393	-0.450022	4.7991	-2.47855	0.0153454	0.148968	-3.13	4.73074	4.90164
FILIP1	All Targets	RNA	Endogenous	1	1	48	14	9.65556	1	1	27145	FALSE	-0.704615	5.08242	-0.449992	4.94966	-2.78019	0.0068031	0.104527	-2.47305	4.86997	5.0692
PRB4	All Targets	RNA	Endogenous	1	1	28	8	6.82958	1	1	5545	FALSE	-0.595484	4.66589	-0.449973	4.48476	-2.2596	0.0266295	0.188149	-3.55053	4.30206	4.7588
RSPH4A	All Targets	RNA	Endogenous	1	1	61	12.5	9.81529	1	1	345895	FALSE	-0.604584	5.1138	-0.449809	4.97084	-2.52595	0.0135594	0.139927	-3.04173	4.8672	5.1263
PDPN	All Targets	RNA	Endogenous	1	1	36	10.5	7.74395	1	1	10630	FALSE	-0.20391	4.81544	-0.449769	4.64864	-2.34571	0.0215262	0.170752	-3.39325	4.51221	4.85329
NUDT6	All Targets	RNA	Endogenous	1	1	45	8	6.67586	1	1	11162	FALSE	0.154805	4.65226	-0.449748	4.45925	-2.28372	0.0251026	0.183734	-3.51398	4.4002	4.54783
UHRF1BP1L	All Targets	RNA	Endogenous	1	1	36	13	8.62905	1	1	23074	FALSE	0.501721	4.94732	-0.449718	4.80004	-2.36639	0.0204381	0.168354	-3.36104	4.62763	5.05866
BRS3	All Targets	RNA	Endogenous	1	1	42	10.5	7.87832	1	1	680	FALSE	-0.773021	4.83502	-0.449642	4.67177	-2.39995	0.0187757	0.161937	-3.27708	4.55294	4.85
TLE7	All Targets	RNA	Endogenous	1	1	37	10.5	8.3432	1	1	102723796	FALSE	-0.807325	4.89426	-0.449405	4.74005	-2.40142	0.0187058	0.161674	-3.2762	4.58882	4.96689
RHOBTB1	All Targets	RNA	Endogenous	1	1	39	12.5	9.68297	1	1	9886	FALSE	0.390697	5.08895	-0.449367	4.95778	-2.49667	0.0146393	0.145903	-3.11168	4.87389	5.08363
FAM187B	All Targets	RNA	Endogenous	1	1	33	8.5	7.01567	1	1	148109	FALSE	0.039602	4.694	-0.449034	4.51828	-2.35208	0.0211854	0.170471	-3.38121	4.39825	4.69832
KRTAP3-2	All Targets	RNA	Endogenous	1	1	36	10.5	7.90166	1	1	83897	FALSE	0.0766547	4.83699	-0.448814	4.67499	-2.3387	0.0219063	0.172618	-3.40308	4.50494	4.93007
FBXO48	All Targets	RNA	Endogenous	1	1	49	12	9.58886	1	1	554251	FALSE	-0.17491	5.06393	-0.448813	4.9231	-2.59171	0.0113917	0.130158	-2.91025	4.91828	4.93033
EFNA5	All Targets	RNA	Endogenous	1	1	51	13.5	11.0304	1	1	1946	FALSE	-0.246591	5.23245	-0.448642	5.10877	-2.33166	0.0222945	0.172759	-3.45277	4.96475	5.3248
PROKR2	All Targets	RNA	Endogenous	1	1	34	10	8.05605	1	1	128674	FALSE	0.0447115	4.86654	-0.44864	4.69949	-2.42989	0.0173955	0.157542	-3.24675	4.58469	4.87169
COLEC10	All Targets	RNA	Endogenous	1	1	28	12	9.52165	1	1	10584	FALSE	0.0426733	5.05059	-0.44857	4.91575	-2.58685	0.0115404	0.130921	-2.91058	4.8511	5.01272
BANF2	All Targets	RNA	Endogenous	1	1	39	13	8.96646	1	1	140836	FALSE	0.441979	5.00734	-0.448427	4.86278	-2.43989	0.0169556	0.156123	-3.20873	4.72535	5.06892
ADAMTS13	All Targets	RNA	Endogenous	1	1	46	15	11.33	1	1	11093	FALSE	-0.315838	5.27103	-0.448416	5.15053	-2.5802	0.0117467	0.13174	-2.94153	5.00346	5.37114
TMEM196	All Targets	RNA	Endogenous	1	1	45	10	8.0888	1	1	256130	FALSE	-0.194111	4.86728	-0.448383	4.70751	-2.40418	0.0185748	0.161238	-3.29133	4.71431	4.69732
GLP1R	All Targets	RNA	Endogenous	1	1	36	6.5	5.88616	1	1	2740	FALSE	-0.583195	4.52581	-0.448371	4.29128	-2.27315	0.0257619	0.185911	-3.51912	4.28585	4.29943
RBM24	All Targets	RNA	Endogenous	1	1	34	9.5	7.38297	1	1	221662	FALSE	-0.377093	4.74884	-0.448296	4.58266	-2.49273	0.0147901	0.146298	-3.09132	4.47997	4.7367
THBD	All Targets	RNA	Endogenous	1	1	30	11.5	9.25591	1	1	7056	FALSE	0.520779	5.0241	-0.448282	4.87456	-2.27664	0.0255425	0.185109	-3.55809	4.77635	5.02188
CD99L2	All Targets	RNA	Endogenous	1	1	28	12	7.39258	1	1	83692	FALSE	-0.339204	4.75693	-0.447934	4.58476	-2.458	0.0161835	0.152466	-3.16963	4.4718	4.7542
ZNF7	All Targets	RNA	Endogenous	1	1	43	13	9.13862	1	1	7553	FALSE	-0.57544	5.01377	-0.447878	4.86898	-2.43853	0.0170148	0.156269	-3.22452	4.77554	5.00916
THEMIS	All Targets	RNA	Endogenous	1	1	38	11.5	8.37205	1	1	387357	FALSE	-0.361036	4.90742	-0.447722	4.75027	-2.45771	0.0161953	0.152466	-3.17791	4.72513	4.78798
FRMPD4	All Targets	RNA	Endogenous	1	1	52	13.5	9.43945	1	1	9758	FALSE	-0.0274029	5.06549	-0.447717	4.92279	-2.30771	0.0236606	0.178158	-3.48995	4.80096	5.10554
KRTAP5-4	All Targets	RNA	Endogenous	1	1	42	14	9.31128	1	1	387267	FALSE	-0.310237	5.04202	-0.447697	4.90396	-2.41055	0.0182762	0.160638	-3.28231	4.77394	5.09899
MTG2	All Targets	RNA	Endogenous	1	1	59	12.5	9.50517	1	1	26164	FALSE	-0.94581	5.05461	-0.447567	4.92467	-2.52477	0.0136017	0.140199	-3.03688	4.78289	5.13733
TAS2R42	All Targets	RNA	Endogenous	1	1	39	11.5	8.46375	1	1	353164	FALSE	0.114205	4.92821	-0.447529	4.76593	-2.22977	0.0286312	0.193793	-3.65027	4.65595	4.9309
AMH	All Targets	RNA	Endogenous	1	1	44	12.5	9.5102	1	1	268	FALSE	0.424794	5.06501	-0.447465	4.93498	-2.6034	0.0110407	0.129181	-2.87769	4.86396	5.04152
PSMB11	All Targets	RNA	Endogenous	1	1	24	7.5	6.80611	1	1	122706	FALSE	-0.0100026	4.65337	-0.447452	4.47393	-2.30732	0.0236831	0.178158	-3.48106	4.43817	4.52757
OR12D3	All Targets	RNA	Endogenous	1	1	38	10	8.19361	1	1	81797	FALSE	0.135235	4.89359	-0.447408	4.73149	-2.36325	0.0206002	0.168674	-3.37171	4.58895	4.9453
UGT2A3	All Targets	RNA	Endogenous	1	1	46	10.5	8.89875	1	1	79799	FALSE	-0.455798	4.9724	-0.447318	4.83269	-2.59069	0.0114226	0.130158	-2.8986	4.78623	4.90237
SDK1	All Targets	RNA	Endogenous	1	1	31	14	8.62892	1	1	221935	FALSE	0.518114	4.95061	-0.447015	4.80576	-2.4424	0.0168466	0.155596	-3.22957	4.7142	4.94311
NALCN	All Targets	RNA	Endogenous	1	1	38	11.5	8.93728	1	1	259232	FALSE	0.0173703	4.98627	-0.446869	4.83992	-2.47728	0.0153959	0.149066	-3.13499	4.71273	5.03071
TRPC1	All Targets	RNA	Endogenous	1	1	40	11.5	8.74978	1	1	7220	FALSE	0.191067	4.96864	-0.446833	4.81385	-2.30865	0.0236054	0.178082	-3.48925	4.69862	4.9867
CENPVL3	All Targets	RNA	Endogenous	1	1	33	11.5	7.50149	1	1	347549	FALSE	0.136887	4.79197	-0.446691	4.61832	-2.27983	0.0253433	0.18448	-3.52821	4.52027	4.76541
TAAR1	All Targets	RNA	Endogenous	1	1	50	10	7.4855	1	1	134864	FALSE	-0.319441	4.78423	-0.446605	4.61654	-2.33458	0.0221326	0.172751	-3.42064	4.52218	4.75808
CCL4L1	All Targets	RNA	Endogenous	1	1	36	10	7.92433	1	1	388372	FALSE	-0.0791045	4.84014	-0.446381	4.68169	-2.41404	0.0181148	0.160246	-3.26119	4.58408	4.8281
CAMK2A	All Targets	RNA	Endogenous	1	1	35	10.5	7.5426	1	1	815	FALSE	-0.0353075	4.77611	-0.446377	4.61196	-2.29962	0.0241385	0.179478	-3.49746	4.53738	4.72383
FSCN3	All Targets	RNA	Endogenous	1	1	42	9	7.19856	1	1	29999	FALSE	-0.889652	4.73244	-0.446136	4.54253	-2.41828	0.0179197	0.159572	-3.24843	4.50335	4.60131
NEK5	All Targets	RNA	Endogenous	1	1	30	10	7.46371	1	1	341676	FALSE	0.148675	4.78255	-0.446057	4.60352	-2.30245	0.0239703	0.179186	-3.48518	4.48068	4.78777
GALNT16	All Targets	RNA	Endogenous	1	1	32	9.5	7.16131	1	1	57452	FALSE	0.336117	4.7431	-0.446002	4.55358	-2.26819	0.0260768	0.186716	-3.5527	4.42426	4.74756
CNGA2	All Targets	RNA	Endogenous	1	1	57	10	8.47878	1	1	1260	FALSE	-0.206289	4.92755	-0.445587	4.7762	-2.36045	0.0207452	0.169169	-3.37859	4.63954	4.98119
MAP3K4	All Targets	RNA	Endogenous	1	1	33	13	9.6837	1	1	4216	FALSE	-0.127644	5.06069	-0.44553	4.92719	-2.42618	0.0175616	0.158151	-3.25608	4.86511	5.02031
CCL7	All Targets	RNA	Endogenous	1	1	26	11.5	7.64083	1	1	6354	FALSE	-0.206667	4.80142	-0.445513	4.63657	-2.38338	0.0195806	0.165587	-3.32568	4.58335	4.7164
PRICKLE3	All Targets	RNA	Endogenous	1	2	62	10.5	10.2171	1	1	4007	FALSE	-0.375916	5.13377	-0.445269	4.99558	-2.43949	0.0169729	0.156123	-3.22929	4.91706	5.11337
RDX	All Targets	RNA	Endogenous	1	1	52	16	12.187	1	1	5962	FALSE	0.0345032	5.35274	-0.445231	5.24194	-2.46864	0.0157445	0.150264	-3.17458	5.08163	5.48241
CHODL	All Targets	RNA	Endogenous	1	1	30	10	7.45115	1	1	140578	FALSE	-0.438973	4.76675	-0.445213	4.59411	-2.21996	0.0293178	0.196083	-3.6501	4.5112	4.71846
NME5	All Targets	RNA	Endogenous	1	1	43	12	9.1091	1	1	8382	FALSE	-0.322605	5.0024	-0.445018	4.85476	-2.37916	0.0197909	0.166118	-3.33095	4.73084	5.04062
SLCO1C1	All Targets	RNA	Endogenous	1	1	31	8	7.94705	1	1	53919	FALSE	0.014298	4.8608	-0.444897	4.69388	-2.34647	0.021485	0.170701	-3.40208	4.59227	4.8463
NLRP5	All Targets	RNA	Endogenous	1	1	35	12.5	8.03235	1	1	126206	FALSE	0.775784	4.86701	-0.444685	4.70611	-2.28101	0.02527	0.184295	-3.55087	4.68894	4.73186
SORBS3	All Targets	RNA	Endogenous	1	1	37	15.5	12.0938	1	1	10174	FALSE	0.277519	5.34704	-0.444668	5.22913	-2.35045	0.0212724	0.1706	-3.43857	5.12003	5.39277
DYNLT5	All Targets	RNA	Endogenous	1	1	50	8.5	7.15927	1	1	200132	FALSE	-0.398269	4.75331	-0.444606	4.55787	-2.46145	0.0160396	0.152044	-3.167	4.53107	4.59807
SSPN	All Targets	RNA	Endogenous	1	1	37	10	8.75318	1	1	8082	FALSE	0.38666	4.94492	-0.444568	4.79128	-2.28363	0.0251083	0.183734	-3.54164	4.74854	4.85539
RXFP2	All Targets	RNA	Endogenous	1	1	37	10.5	7.85866	1	1	122042	FALSE	-0.219485	4.82451	-0.444413	4.66671	-2.38624	0.0194398	0.164859	-3.32402	4.54885	4.84349
KLHL15	All Targets	RNA	Endogenous	1	1	35	11	9.59683	1	1	80311	FALSE	-0.0896174	5.05814	-0.444264	4.92319	-2.46103	0.0160573	0.152044	-3.18439	4.84037	5.04742
CDKN3	All Targets	RNA	Endogenous	1	1	49	15	10.6773	1	1	1033	FALSE	-0.0158201	5.19866	-0.444	5.07707	-2.53127	0.0133711	0.139289	-3.04928	4.99351	5.20242
PF4	All Targets	RNA	Endogenous	1	1	47	10	10.3641	1	1	5196	FALSE	-0.309643	5.153	-0.443949	5.03152	-2.55536	0.0125478	0.135856	-2.96027	4.82275	5.34467
NT5DC3	All Targets	RNA	Endogenous	1	1	24	9.5	7.77036	1	1	51559	FALSE	0.283129	4.81261	-0.443596	4.63622	-2.42337	0.0176884	0.158501	-3.24882	4.54128	4.77862
ECRG4	All Targets	RNA	Endogenous	1	1	37	8.5	7.23541	1	1	84417	FALSE	-0.544393	4.7483	-0.443511	4.56117	-2.21083	0.0299701	0.198609	-3.64227	4.46542	4.70479
GNRHR	All Targets	RNA	Endogenous	1	1	34	13	9.07422	1	1	2798	FALSE	-0.669485	5.01279	-0.443345	4.86231	-2.4432	0.0168117	0.155391	-3.20554	4.75544	5.02261
USP28	All Targets	RNA	Endogenous	1	1	60	17	13.1854	1	1	57646	FALSE	-1.22774	5.45068	-0.443278	5.35005	-2.88132	0.00510944	0.0947216	-2.26004	5.33391	5.37428
RGS19	All Targets	RNA	Endogenous	1	1	44	13	11.663	1	1	10287	FALSE	-0.33786	5.29051	-0.443265	5.17322	-2.51014	0.0141334	0.143132	-3.08413	4.96612	5.48387
SWSAP1	All Targets	RNA	Endogenous	1	1	43	14	10.2279	1	1	126074	FALSE	0.0820217	5.14226	-0.443092	5.01135	-2.61045	0.010834	0.128652	-2.87446	4.93813	5.12119
PLAC1	All Targets	RNA	Endogenous	1	1	32	12	8.60607	1	1	10761	FALSE	0.339993	4.9417	-0.442896	4.79322	-2.47597	0.0154485	0.149256	-3.1591	4.76382	4.83731
RNF148	All Targets	RNA	Endogenous	1	1	51	13	9.54983	1	1	378925	FALSE	-0.164488	5.07187	-0.442886	4.93701	-2.49535	0.0146897	0.145986	-3.10836	4.8636	5.04714
ACTRT3	All Targets	RNA	Endogenous	1	1	33	11	8.63889	1	1	84517	FALSE	-0.768774	4.94285	-0.442812	4.79033	-2.62517	0.0104134	0.126319	-2.82686	4.72678	4.88565
DNAI1	All Targets	RNA	Endogenous	1	1	52	9	7.74757	1	1	27019	FALSE	0.963154	4.82497	-0.442435	4.65166	-2.24107	0.0278583	0.191468	-3.63346	4.60751	4.71789
GOT1	All Targets	RNA	Endogenous	1	1	51	16	12.1514	1	1	2805	FALSE	0.357702	5.3555	-0.442024	5.24172	-2.30934	0.0235762	0.178005	-3.52664	5.17287	5.345
ABCG5	All Targets	RNA	Endogenous	1	1	44	13	9.06186	1	1	64240	FALSE	0.409424	5.00737	-0.441984	4.8626	-2.3182	0.0230536	0.175313	-3.48107	4.73515	5.05377
SKIDA1	All Targets	RNA	Endogenous	1	1	48	13	10.7996	1	1	387640	FALSE	0.261138	5.22238	-0.44189	5.09151	-2.60802	0.0109048	0.1288	-2.89784	5.06531	5.13082
ZNF727	All Targets	RNA	Endogenous	1	1	52	10	8.37108	1	1	442319	FALSE	-0.716319	4.92147	-0.441866	4.75847	-2.39965	0.01879	0.161937	-3.30689	4.73424	4.79482
WDR61	All Targets	RNA	Endogenous	1	1	59	16.5	12.9023	1	1	80349	FALSE	-0.329095	5.42809	-0.44141	5.32866	-2.54608	0.0128592	0.136663	-3.03628	5.28449	5.39491
IL27	All Targets	RNA	Endogenous	1	1	55	12	10.7557	1	1	246778	FALSE	0.326026	5.20629	-0.441406	5.08575	-2.39247	0.0191352	0.163165	-3.34003	4.99872	5.2163
DUSP21	All Targets	RNA	Endogenous	1	1	31	10	6.78215	1	1	63904	FALSE	0.0117267	4.66486	-0.441055	4.47532	-2.20587	0.0303293	0.199883	-3.65403	4.31979	4.70862
COL11A1	All Targets	RNA	Endogenous	1	1	42	13	9.44266	1	1	1301	FALSE	0.194104	5.06423	-0.441023	4.92327	-2.31792	0.0230695	0.17536	-3.4688	4.76387	5.16237
FNDC5	All Targets	RNA	Endogenous	1	1	53	10.5	7.9076	1	1	252995	FALSE	-0.405319	4.84698	-0.440959	4.68704	-2.50814	0.0142073	0.143408	-3.076	4.65085	4.74133
CDCP2	All Targets	RNA	Endogenous	1	1	33	11	7.71264	1	1	200008	FALSE	-0.254519	4.81166	-0.440672	4.65255	-2.45574	0.016278	0.152849	-3.17274	4.52778	4.83971
SLC16A9	All Targets	RNA	Endogenous	1	1	27	8	6.63093	1	1	220963	FALSE	-0.203979	4.6268	-0.440625	4.44631	-2.25027	0.027242	0.189726	-3.572	4.34159	4.6034
SEPTIN11	All Targets	RNA	Endogenous	1	1	72	18	13.4862	1	1	55752	FALSE	-0.583062	5.48382	-0.440409	5.38578	-2.47007	0.0156865	0.149949	-3.17995	5.20954	5.65015
FLG2	All Targets	RNA	Endogenous	1	1	36	13	9.5282	1	1	388698	FALSE	0.912196	5.06224	-0.440268	4.9168	-2.21006	0.0301245	0.199056	-3.71436	4.86219	4.99872
HOMER2	All Targets	RNA	Endogenous	1	1	44	13	9.88883	1	1	9455	FALSE	-0.0023286	5.10842	-0.440266	4.96718	-2.26699	0.0261537	0.186788	-3.56588	4.78468	5.24094
ERLIN1	All Targets	RNA	Endogenous	1	1	41	13	8.96661	1	1	10613	FALSE	-0.0642713	4.98367	-0.439881	4.84099	-2.30599	0.0237615	0.178302	-3.49403	4.71178	5.0348
GLP2R	All Targets	RNA	Endogenous	1	1	35	11.5	7.93116	1	1	9340	FALSE	-0.0555745	4.84829	-0.439787	4.68337	-2.33753	0.0219708	0.172695	-3.41475	4.54734	4.88742
CRYGC	All Targets	RNA	Endogenous	1	1	37	10.5	8.27577	1	1	1420	FALSE	-0.104828	4.88824	-0.439716	4.73604	-2.40955	0.0183229	0.160638	-3.26521	4.56047	4.99939
CACNG5	All Targets	RNA	Endogenous	1	1	42	13	9.04643	1	1	27091	FALSE	-0.531228	5.00521	-0.439627	4.85932	-2.51444	0.013975	0.142338	-3.06203	4.79737	4.95224
PIP4K2B	All Targets	RNA	Endogenous	1	2	44	14	10.6343	1	1	8396	FALSE	0.340679	5.17977	-0.439398	5.05477	-2.40288	0.0186363	0.161538	-3.32317	4.95931	5.19795
FCRL2	All Targets	RNA	Endogenous	1	1	38	7.5	7.15282	1	1	79368	FALSE	-0.913223	4.72977	-0.439319	4.54212	-2.25469	0.0269504	0.189156	-3.56214	4.44091	4.69393
NANP	All Targets	RNA	Endogenous	1	1	31	10.5	8.27481	1	1	140838	FALSE	-0.108308	4.8841	-0.439236	4.73138	-2.40774	0.0184077	0.160872	-3.29274	4.6213	4.8965
APELA	All Targets	RNA	Endogenous	1	1	44	13	8.34686	1	1	100506013	FALSE	0.369759	4.91528	-0.439217	4.7607	-2.3609	0.0207221	0.169094	-3.37411	4.57059	5.04586
VXN	All Targets	RNA	Endogenous	1	1	49	13	10.439	1	1	254778	FALSE	-0.253599	5.16828	-0.439209	5.03363	-2.2387	0.0280191	0.191834	-3.63924	4.9296	5.18969
PSMC6	All Targets	RNA	Endogenous	1	2	51	16	14.6326	1	1	5706	FALSE	0.00965007	5.58291	-0.438941	5.48228	-2.46053	0.016078	0.15209	-3.22945	5.42219	5.5724
GPR139	All Targets	RNA	Endogenous	1	1	35	10	7.58671	1	1	124274	FALSE	0.186679	4.79091	-0.438698	4.63036	-2.3513	0.0212269	0.170471	-3.39162	4.55511	4.74324
MYL1	All Targets	RNA	Endogenous	1	1	33	9.5	7.08824	1	1	4632	FALSE	-0.618613	4.71384	-0.438056	4.53769	-2.36267	0.0206299	0.168754	-3.35426	4.4545	4.66249
[truncated: 16,040 more rows]
