# Supplementary material for: Spatial Transcriptomics of Perineural Invasion in Pancreatic Ductal Adenocarcinomas
Source: Research Square preprint supplement (doi:10.21203/rs.3.rs-5253213/v1), 2024-12-02
Supplement: Supplementary file 5 [file 94a004ba6f469474999b2d3d.xlsx]

## Sheet: regions_10000
Supplementary Table 8. IHC for Nestin in PNI and non-PNI foci. Quantification performed in QuPath.
Image	Object ID	Sample	Name	Classification	Parent	ROI	Centroid X Âµm	Centroid Y Âµm	ROI: 0.46 Âµm per pixel: opal 520: Mean	ROI: 0.46 Âµm per pixel: opal 520: Std.dev.	ROI: 0.46 Âµm per pixel: opal 520: Min	ROI: 0.46 Âµm per pixel: opal 520: Max	ROI: 0.46 Âµm per pixel: opal 520: Median	Num Detections	Num Negative	Num Positive	Positive %	Num Positive per mm^2	Area Âµm^2	Perimeter Âµm
556008.afi	8360478e-e24a-4419-8376-1043fd342aa2	1875	Region 1	Positive	PNI	Geometry	8432.7	3782.8	15619.3	9596.06	1244	65535	13159.5	58	9	49	84.48	5075.3	9654.7	754.51
556008.afi	4d4cac37-60ca-4784-9b3d-e43b531dd084	1875	Region 2	Positive	PNI	Geometry	9077.2	3799.2	12239.1	8096.06	1110	60939	9912.5	66	30	36	54.55	3962.7	9084.8	1457
556008.afi	f6b54aaf-4cca-4cbd-96b2-0a436baa5b05	1875	Region 3	Positive	PNI	Geometry	5704.2	10980.5	15135.9	9201.2	2158	65527	12457.5	523	117	406	77.63	5357.1	75787.8	19015.1
556008.afi	cd1c328d-dc37-4d22-b1bd-ae831e876c05	1875	Region 4	Positive	non-PNI	Geometry	3424.8	7062.3	9517.37	4734.56	2139	58476	8264.5	234	167	67	28.63	1307.4	51247	11890
556008.afi	f1fca946-8bda-4972-9ba9-b3f7c5d6afae	1875	Region 5	Positive	non-PNI	Geometry	3211.6	7444.7	4304.33	1694.72	1153	47047	3908.5	145	145	0	0	0	40568.7	6531.3
556008.afi	a0df017f-9711-4640-9001-64945b2c26a3	1875	Region 6	Positive	non-PNI	Geometry	3239.4	8179	5574.87	3357.53	1005	40149	4557.5	70	70	0	0	0	14186.5	3939.1
556009.afi	e4070a12-1d22-4231-9325-4dc4a26b8c93	2343	Region 7	Positive	PNI	Geometry	10133.6	3383.4	13681.2	7976.61	1130	65479	11767.5	1165	322	843	72.36	8255.9	102109	6695.8
556009.afi	05ebb0bd-c797-40d9-b2a1-d1bc403c5e8f	2343	Region 8	Positive	PNI	Geometry	7498.3	3184	6189.07	4107.63	728	61032	4981.5	129	124	5	3.876	199.11	25112.4	4515.9
556009.afi	5a802831-5d40-4eba-8df1-db16d1a7f74b	2343	Region 9	Positive	PNI	Geometry	12978.7	5161	20300.1	10963.7	2897	65535	17934.5	376	6	370	98.4	7965.7	46449	4883.9
556009.afi	2b2d41d0-86c3-4522-8e89-fec8ffbc2c2a	2343	Region 10	Positive	non-PNI	Geometry	17900.7	2356.9	2457.02	944.144	337	23925	2311.5	328	328	0	0	0	53485	2730
556009.afi	5749bdd0-da47-45aa-8ed0-8a907c6acf3b	2343	Region 11	Positive	non-PNI	Geometry	16195.5	1746	2145.96	882.68	40	34874	2018.5	3094	3094	0	0	0	509527	42548.1
556010.afi	590c7066-1cee-4cde-ae2d-11685025476b	1938	Region 12	Positive	PNI	Geometry	10068.7	13042.7	9090.26	8011.76	624	65535	6279.5	1891	1349	542	28.66	1360.7	398325	60251.4
556010.afi	fb779dbe-e748-4f88-b8e3-66d253efb705	1938	Region 12.5	Positive	PNI	Geometry	10322.4	14710	10096.8	7787.01	756	65535	7486.5	1290	750	540	41.86	1982.5	272381	31786.2
556010.afi	df2470f4-0b33-4ba3-a0d0-e17c7ac2b86a	1938	Region 13	Positive	PNI	Geometry	3941.3	5074.6	6545.91	6537.78	433	65465	4230.5	184	174	10	5.435	383.88	26049.7	15876.1
556010.afi	88f2979a-ad29-4d47-96e9-b33b8acb62cd	1938	Region 14	Positive	PNI	Geometry	5522.6	13906	28837.7	17453.4	1506	65535	26716.5	294	34	260	88.44	5179.8	50195.3	4978.4
556010.afi	4f787a30-791c-4689-9520-f73bccb5a011	1938	Region 15	Positive	PNI	Geometry	5305.3	12968.9	27255.8	15034.2	2096	65535	25007.5	259	9	250	96.53	7781.2	32128.9	2261.9
556010.afi	bf3451b9-355b-4899-b2ef-968bb0119c22	1938	Region 16	Positive	non-PNI	Geometry	20632.9	15489.8	16397.5	11955.4	1061	65535	13795.5	125	21	104	83.2	5195.3	20018.2	1798.9
556046.afi	3e898e75-02e9-4d6b-8b01-f94db6454e0f	3435	Region 18	Positive	PNI	Geometry	7152.8	10655.1	4195.6	3693.68	183	62526	3067.5	820	800	20	2.439	114.1	175282	10933.1
556046.afi	abbe7063-2b8a-4e37-9007-22e9cb8a8681	3435	Region 19	Positive	PNI	Geometry	2596.9	9755.2	14355.2	8791.62	1791	65436	11741.5	171	51	120	70.18	4443.5	27005.8	1499.7
556046.afi	a05600a5-cf32-4d24-b775-f57058691172	3435	Region 20	Positive	PNI	Geometry	3733.9	10146.6	14537	9597.06	1549	65535	11637.5	170	62	108	63.53	2983.5	36198.5	1718.8
556046.afi	56f3c4aa-d639-4ed3-80c4-fb63bd05dcd0	3435	Region 21	Positive	PNI	Geometry	4309.1	9533.2	11122.5	7877.42	1355	65511	8613.5	89	41	48	53.93	2609.3	18395.9	1271.1
556046.afi	40c72f8a-0b94-4ee6-88ae-4a5d1f8a8290	3435	Region 22	Positive	non-PNI	Geometry	22071.8	11529.4	5158.86	4125.47	450	65425	3958.5	337	318	19	5.638	231.48	82081.8	6647
556095.afi	15f0f275-9b69-4474-a68e-89ebfdd9e8c9	1877	Region 26	Positive	PNI	Geometry	13898	5675.5	6816.86	4922.27	180	60494	5396.5	36	33	3	8.333	436.56	6871.9	1141.1
556095.afi	4d64ade9-3e17-465c-a765-f0957fb8a17f	1877	Region 27	Positive	non-PNI	Geometry	15343.2	7029.6	2099.54	1225.78	22	37290	1805.5	499	499	0	0	0	90275.4	29408.6
556095.afi	e31b847e-5090-4225-8326-c1b72081d416	1877	Region 28	Positive	non-PNI	Geometry	17246.4	9004.3	2118.15	1006.31	18	17116	1893.5	601	601	0	0	0	103748	13894.7
556099.afi	176fa4c9-3d8f-4248-a112-9b9a2051ebc3	1944	Region 29	Positive	PNI	Geometry	2261.4	12148.3	10907.7	7019.15	1526	65505	8587.5	179	92	87	48.6	3464	25115.4	1564.2
556099.afi	25195410-6ef2-43aa-b29a-ca63d821c525	1944	Region 30	Positive	PNI	Geometry	2804.2	12474	17937.2	11156.9	2707	65535	14550.5	131	3	128	97.71	6026.4	21240	1477.4
556099.afi	1a869455-096c-4b23-928b-4e853fde9389	1944	Region 31	Positive	PNI	Geometry	8847.1	10600.4	17881.2	10562.1	1966	65535	15605.5	240	19	221	92.08	7479	29549.4	2328.6
556099.afi	4dca5770-981a-46d4-b4d0-de8017c7965d	1944	Region 32	Positive	non-PNI	Geometry	23195.2	5716.9	4044.72	2505.45	615	44941	3449.5	142	139	3	2.113	126.39	23735.2	1471.9
556099.afi	4ee5754c-9717-405e-9825-2684d578faa5	1944	Region 33	Positive	non-PNI	Geometry	23145.5	5955.4	3854.79	2823.5	639	60500	3169.5	142	141	1	0.7042	29.71	33658.4	2700.3
556099.afi	78b27a21-a2b5-4a3b-aca8-062ae4c3964f	1944	Region 34	Positive	non-PNI	Geometry	22841.5	6243.5	3424.87	2579.34	392	65368	2828.5	151	150	1	0.6623	27.53	36322	3910.1
556099.afi	ca7eaece-7159-4b1c-8f22-fbd839efd1b6	1944	Region 34.5	Positive	non-PNI	Geometry	24758.1	5618.1	3054.81	1484.38	208	59968	2832.5	356	356	0	0	0	72818.5	6855.6
556103.afi	83c554bc-707e-4570-a3ec-7babe151189d	2029	Region 35	Positive	PNI	Geometry	8330.2	12846.2	2192.32	863.251	151	40702	2058.5	945	942	3	0.3175	18.95	158285	30239.9
556103.afi	4ba9a0d9-c5a9-40c5-9f70-9a1966f41b0a	2029	Region 36	Positive	PNI	Geometry	7925.1	12313.6	4314.11	2672.51	513	43408	3584.5	118	88	30	25.42	1921.1	15615.7	880.88
556103.afi	67908294-405a-423b-bc03-bfd2c045b400	2029	Region 37	Positive	PNI	Geometry	7344.3	12093.9	3980.06	3043.64	461	49709	3152.5	205	174	31	15.12	966.54	32073.2	4662.7
556103.afi	7087cc5e-9ba9-46d8-9c78-2045f490f96f	2029	Region 38	Positive	PNI	Geometry	7781.5	12982.4	4733.16	3870.64	239	64893	3511.5	460	350	110	23.91	1486.3	74008.3	10526
556103.afi	b3273b30-0096-46a2-ac9c-071f4686d8a9	2029	Region 39	Positive	PNI	Geometry	7983.2	8429.2	10423.8	7171.6	948	65469	8251.5	244	17	227	93.03	4946.2	45893.8	2124.2
556103.afi	be500ec9-1ab1-4c4b-b3e8-95ce5c5ace26	2029	Region 40	Positive	non-PNI	Geometry	11028.6	10077.9	2145.49	1101.82	88	42406	1932.5	433	430	3	0.6928	43.32	69256.1	4489.9
556103.afi	13025459-42e4-4962-b6fe-38289b58f24b	2029	Region 41	Positive	non-PNI	Geometry	9794	9035.2	2179.58	1256.27	17	48308	1969.5	819	815	4	0.4884	30.12	132788	9942.4
556103.afi	63031865-6fe5-4b42-8ed2-b0efa95ff342	2029	Region 42	Positive	non-PNI	Geometry	10193	9873.3	2194.1	1269.91	23	51327	1957.5	609	601	8	1.314	74.31	107661	13837.6
556103.afi	8e15a5c0-80cd-46e4-8388-a2bf1d766f0c	2029	Region 43	Positive	PNI	Geometry	8403.3	9860.4	5098.36	3992.71	531	55588	3780.5	316	186	130	41.14	2669.1	48706	4042
