# Supplementary material for: Spatial Transcriptomics of Perineural Invasion in Pancreatic Ductal Adenocarcinomas
Source: Research Square preprint supplement (doi:10.21203/rs.3.rs-5253213/v1), 2024-12-02
Supplement: Supplementary file 6 [file 991fe538e8dcc270d5fa0db9.xlsx]

## Sheet: positive 8000
Supplementary Table 5. IHC for MGLL in PNI and non-PNI foci. Quantification performed in QuPath.
Image	Object ID	Sample	Name	Classification	Type	ROI	Centroid X Âµm	Centroid Y Âµm	ROI: 0.46 Âµm per pixel: opal 570: Mean	ROI: 0.46 Âµm per pixel: opal 570: Std.dev.	ROI: 0.46 Âµm per pixel: opal 570: Min	ROI: 0.46 Âµm per pixel: opal 570: Max	ROI: 0.46 Âµm per pixel: opal 570: Median	Num Detections	Num Negative	Num Positive	Positive %	Num Positive per mm^2	Area Âµm^2	Perimeter Âµm
555258.afi	bb5e79d9-b3cf-4372-9554-43612e54ba5c	1993	Region_1	Positive	PNI	Geometry	9764.2	2492.6	18363.1	7475.39	758	56925	18420.5	467	199	268	57.39	2886	92861.1	23643.1
555258.afi	3cb4faa4-1575-418f-9977-f6d9aa7a0ba8	1993	Region_3	Positive	PNI	Geometry	5421	7165.5	21169.5	8673.62	1817	55925	21050.5	283	109	174	61.48	3975.7	43765.9	10284.9
555258.afi	8a548490-5d8c-43fa-bf07-c104d81847e7	1993	Region_4	Positive	non-PNI	Geometry	7439.9	8106.8	20870.3	10139.2	1740	61679	21745.5	485	426	59	12.16	903.1	65330.5	23762.5
555258.afi	eeb749b1-c6f1-44a2-80c8-8f11c3f2e779	1993	Region_5	Positive	non-PNI	Geometry	7474.5	7132.9	17658.9	8372.73	1580	52446	17752.5	301	122	179	59.47	4047.1	44229.2	10432
555258.afi	cec03571-6bcf-4c81-81a3-3c16165b4924	1993	Region_6	Positive	non-PNI	Geometry	7180.8	7325.4	19291.7	7532.51	2015	59095	19075.5	368	213	155	42.12	3033.6	51094.6	14824.6
555263.afi	b5fbe923-467c-4cf9-a21b-8ec33a355c35	1875	Region_10	Positive	non-PNI	Geometry	10245	7743.2	20084.7	6821.11	1027	49448	20200.5	1578	26	1552	98.35	6218	249597	20840.6
555263.afi	e853c3b1-fe3e-4877-9f27-dfdd0c2e91de	1875	Region_11	Positive	non-PNI	Geometry	11574.3	7665.8	20689.6	6702.25	634	64050	20941.5	1143	36	1107	96.85	6018.4	183935	15114.2
555263.afi	650efb1f-e0f9-4500-bbfd-a24c7a92d86e	1875	Region_12	Positive	non-PNI	Geometry	10738.8	6895.8	14705.9	6509.23	640	52887	14024.5	887	110	777	87.6	5899.2	131713	10844.7
555263.afi	73453171-14db-48a1-aacd-016eb9ff11ea	1875	Region_7	Positive	PNI	Geometry	9490.5	2810.8	18793.3	8783.45	851	56645	19131.5	357	19	338	94.68	6018.9	56156.7	5963.3
555263.afi	355c0c13-a245-4218-935b-32f82d19f3c4	1875	Region_8	Positive	PNI	Geometry	10096.6	2891	22125.4	7285.14	1497	50845	22970.5	169	6	163	96.45	5571.5	29255.9	1421.7
555263.afi	7d57ee55-bba8-4355-82d2-fbd23e61bde5	1875	Region_9	Positive	PNI	Geometry	5985.8	9589.5	13773.9	6703.27	445	46220	12955.5	332	30	302	90.96	5827.2	51825.7	6146.4
555267.afi	a192c368-1d85-4fdf-874d-9b35489916fc	1938	Region_13	Positive	PNI	Geometry	10671.2	15218.7	12840.1	6291.93	223	56586	12220.5	977	190	787	80.55	4017.1	195912	38434.1
555267.afi	218e3804-5339-48dd-a9c4-f88e97bd678c	1938	Region_14	Positive	PNI	Geometry	3979.8	5636.6	12892	6507.37	484	51036	11865.5	659	84	575	87.25	6462.2	88978.7	9934.1
555267.afi	ac23b533-0fae-4fc8-b1e4-1f6f8b9ae6df	1938	Region_15	Positive	PNI	Geometry	5862.4	14295.2	10844.8	5914.25	71	41040	10441.5	348	91	257	73.85	3869.2	66421.5	13263.4
555267.afi	9da651a4-1c57-469a-b126-b3ae05a5d665	1938	Region_16	Positive	PNI	Geometry	5475.9	13638.3	8325.79	6227.39	159	46469	6377.5	133	83	50	37.59	2378.2	21024.1	5657
555267.afi	63f335b2-2cff-4003-a83c-6d703defe012	1938	Region_17	Positive	non-PNI	Geometry	13311.5	15390.4	8074.34	4475.13	17	34123	7095.5	1096	638	458	41.79	1969.4	232561	38446.8
555267.afi	6ae29136-fd48-4ae7-8775-4f95de32e16a	1938	Region_17.5	Positive	non-PNI	Geometry	14229.6	15696.3	6990.41	3650.41	67	34178	6389.5	360	247	113	31.39	1370.1	82477.5	10552
555267.afi	1aac627a-57fd-447a-a10a-4a48cdfc9c71	1938	Region_18	Positive	non-PNI	Geometry	12817.1	12979.1	8706.35	3942.42	368	37209	8065.5	377	177	200	53.05	2592.2	77153.7	13990
555267.afi	09ab056a-8c00-408f-bf51-c5303b193338	1938	Region_19	Positive	non-PNI	Geometry	13446.1	13557.7	19710	8487.58	1108	65535	18861.5	204	6	198	97.06	4132.4	47913.6	8627
555271.afi	18f1bff1-8a90-4dbf-9a7d-bb4249dfd0de	2343	Region_20	Positive	PNI	Geometry	10151	17797.9	4074.09	2752.23	2	33776	3357.5	1254	1018	236	18.82	1135.2	207891	41601.2
555271.afi	4c9ae6e2-0463-45c1-895c-d3d202b29e17	2343	Region_21	Positive	PNI	Geometry	12612.5	19149.3	1168.36	736.777	0	17688	1027.5	693	693	0	0	0	95610	23414
555271.afi	77f6f38a-dd8e-4f1c-96c8-ff29b5d860e8	2343	Region_22	Positive	non-PNI	Geometry	9072.5	19243.6	1193.7	745.413	0	9234	1028.5	123	123	0	0	0	25303.2	6082.5
555271.afi	aa63ac02-942e-4fda-96b9-4c9aaf6dd55a	2343	Region_23	Positive	non-PNI	Geometry	10127.8	19417	1057.3	649.005	0	10993	949.5	288	288	0	0	0	53003.2	12748.6
555271.afi	f895b64e-cd22-483e-bdb5-f39cfc93b318	2343	Region_25	Positive	PNI	Geometry	8172.3	15312.4	5552.19	4026.52	16	41987	4626.5	355	313	42	11.83	642.29	65390.6	13449.2
555271.afi	be2d65b6-a30a-411f-9e80-480fbd08f730	2343	Region_24	Positive	non-PNI	Geometry	11239.3	19453.7	723.223	422.341	0	5904	666.5	163	163	0	0	0	30008.8	9522.4
555275.afi	271a90b0-2018-4cc4-8029-3c1f1dd97411	1942	Region_26	Positive	PNI	Geometry	19203.1	5980.9	5692.54	2811.02	101	33861	5108.5	1701	1551	150	8.818	658.68	227727	56390.6
555275.afi	dd663526-f1aa-487b-a82e-022be27da0b7	1942	Region_27	Positive	PNI	Geometry	23524.7	6107	5395.39	2442.79	238	21973	4942.5	81	80	1	1.235	80.73	12387.4	4857.9
555275.afi	7873d38e-5d0a-40d8-bb75-531453aff88e	1942	Region_28	Positive	PNI	Geometry	23874.6	6849.8	5408.2	2920.37	170	24831	4763.5	240	221	19	7.917	550.92	34487.9	7949.9
555275.afi	cbae02af-7a66-4db5-a360-aaf186042e1f	1942	Region_29	Positive	PNI	Geometry	4909.7	15858	7649.03	3358.52	112	20753	7833.5	61	40	21	34.43	1773.3	11842.6	2577.6
555275.afi	7561ed91-ca62-45e4-aa11-3a7110181433	1942	Region_30	Positive	PNI	Geometry	5777	16064.3	13087.7	6432.87	564	47040	13247.5	137	19	118	86.13	5279.3	22351.4	6814.7
555275.afi	a588623a-a940-47b7-a3d1-dc4c4d01bb35	1942	Region_31	Positive	PNI	Geometry	2159.5	4465.6	6849.79	2871.89	413	27539	6436.5	440	332	108	24.55	1667.6	64762.1	12354.3
555275.afi	d88c0c63-126f-4af9-b941-a116eaeeb7fb	1942	Region_32	Positive	PNI	Geometry	1586.6	5439.4	7216.18	3203.39	140	28646	6770.5	1194	840	354	29.65	1909.2	185415	48149.2
555275.afi	1562ec31-2223-43ea-baca-84f7112018bc	1942	Region_33	Positive	non-PNI	Geometry	14470.8	15746.9	8772.09	4078.75	145	51160	8075.5	1775	862	913	51.44	3709.3	246140	65608.4
555275.afi	184a5431-c1ce-4f05-b0e9-b5812796bea2	1942	Region_34	Positive	non-PNI	Geometry	15672.9	15255.5	8416.18	3406.12	411	41632	7922.5	2467	1302	1165	47.22	3792.1	307216	96309.1
555275.afi	aba6e065-ab8d-42ec-9ee4-388fb0ea5eba	1942	Region_35	Positive	non-PNI	Geometry	17230.9	15772.4	7509.16	3795.86	109	44217	6723.5	1411	989	422	29.91	2043.6	206499	58114.8
555275.afi	32d3877a-3f6a-4c90-894c-ae8b136fa991	1942	Region_36	Positive	non-PNI	Geometry	14617.4	16539.2	8871.8	3848.98	328	38189	8231.5	1293	597	696	53.83	3811.9	182585	44284.9
555310.afi	7b222f1d-bb72-4901-a19f-cc329af0e851	2029	Region_37	Positive	PNI	Geometry	7941.9	12610.7	3966.39	2570.48	28	25576	3338.5	115	112	3	2.609	174.88	17154.3	2064.7
555310.afi	5e7f737a-6ba9-4cce-b735-e4674a71f74e	2029	Region_38	Positive	PNI	Geometry	7380.7	12397.2	3095.14	1808.06	17	27835	2705.5	651	647	4	0.6144	47.81	83663	10920
555310.afi	35bd24a7-5379-4c76-ac07-80760eb37503	2029	Region_39	Positive	PNI	Geometry	7490.2	13256.6	4060.13	2569	116	56451	3483.5	317	309	8	2.524	183.39	43622.2	6608.5
555310.afi	664bb7a4-d690-49a4-b464-32adaf457629	2029	Region_40	Positive	PNI	Geometry	8790.2	8970.7	7465.38	6728.08	75	64759	5029.5	362	226	136	37.57	2844.4	47813.2	6391
555310.afi	b1c92ee1-6331-42e7-8a04-4cea8004b84a	2029	Region_41	Positive	non-PNI	Geometry	8298.6	4982.1	5802.49	3726.48	114	44637	5093.5	319	243	76	23.82	1895.7	40091.7	4359.8
555310.afi	ba00604f-bd26-4013-bb7a-16ec3c2cb801	2029	Region_42	Positive	non-PNI	Geometry	8190.3	5334.1	5928.9	3505.84	46	39319	5302.5	174	133	41	23.56	2038.7	20111.3	2427.8
555310.afi	60964c62-d172-4670-a93f-63bcf653e80c	2029	Region_43	Positive	non-PNI	Geometry	8534.3	5394.8	6030.11	3336.33	0	33033	5424.5	95	77	18	18.95	1453.8	12381.3	1393.8
555310.afi	67a9ef60-6d1f-42e3-b84a-5dce1e1e2af2	2029	Region_44	Positive	non-PNI	Geometry	7868.3	5430.6	5258.53	4057.16	53	44737	4401.5	136	126	10	7.353	620.02	16128.5	2432.6
555317.afi	cc8f572b-d42d-495f-a5e4-081c6ac6dc2c	3435	Region_45	Positive	PNI	Geometry	7128.4	11011.6	13361.9	12225.6	366	65535	8666.5	755	339	416	55.1	3593.1	115778	22895.5
555317.afi	e3a076d8-32c5-4328-aecd-c29831c58ac8	3435	Region_46	Positive	PNI	Geometry	3058.4	10275.1	17556.8	11495.7	837	65531	14727.5	237	21	216	91.14	7619	28350.2	4703.6
555317.afi	8cb9a405-aa69-4925-b005-8076f97f585a	3435	Region_47	Positive	PNI	Geometry	4047.1	10451.7	24723.2	13845.2	865	65535	24107.5	166	10	156	93.98	6781.2	23004.8	3793
555317.afi	f2b35ebd-b6ce-4fd1-a0e6-ff06db9d2d92	3435	Region_48	Positive	PNI	Geometry	4846.9	10256.7	16366.3	12705.6	324	65533	12860.5	318	66	252	79.25	6345.7	39711.8	5805.6
555317.afi	174d2446-f509-42fb-a7cb-1604a26c99eb	3435	Region_49	Positive	PNI	Geometry	4227.1	14972.1	9888.29	6363.33	296	63221	8036.5	862	404	458	53.13	4253.7	107672	14231.6
555317.afi	12fdce10-b70b-4ee8-9718-bf3ddff1e824	3435	Region_51	Positive	non-PNI	Geometry	8979.1	21025.2	1717.7	750.785	14	8401	1581.5	111	111	0	0	0	13362.2	3237.3
555317.afi	9bdf2771-eb99-4300-a496-8abecb980720	3435	Region_52	Positive	non-PNI	Geometry	9332.6	20734.6	1928.02	906.325	0	8250	1752.5	68	68	0	0	0	7886.4	2393.6
555317.afi	db0e3d29-8f2b-49ce-b71e-c25118b4a8aa	3435	Region_53	Positive	non-PNI	Geometry	9599.1	20957.1	1754.37	788.907	0	10359	1641.5	88	88	0	0	0	11655.2	3164.9
555317.afi	1e10d793-0e5c-41c1-ae09-ce9c843df122	3435	Region_54	Positive	non-PNI	Geometry	10237.8	20442	2700.8	1460.04	127	17614	2407.5	93	91	2	2.151	157.7	12682	2106.9
555325.afi	1ec1a2ea-a834-4cb4-8eb7-1a7b8f04594f	1944	Region_55	Positive	PNI	Geometry	2640	12357.9	12026.1	7480.63	408	57569	10587.5	603	134	469	77.78	4919	95343.7	14386.4
555325.afi	7fd8a0b4-5e53-4fc7-b245-289c7fa62af1	1944	Region_56	Positive	PNI	Geometry	3251.6	12633.1	13903.4	8361.36	257	61128	13376.5	153	39	114	74.51	4284.7	26606.4	6210.8
555325.afi	ea92c85f-4699-4a38-a436-6937b951c9eb	1944	Region_57	Positive	PNI	Geometry	9345.4	10790.8	21076.5	7842.06	938	58785	21061.5	687	39	648	94.32	5070.2	127806	17239.6
555325.afi	cc6908d4-3646-4ebb-9c02-8ba08e765381	1944	Region_58	Positive	non-PNI	Geometry	15709.8	5588.2	15283.4	10556.3	384	65535	14217.5	705	265	440	62.41	4241.7	103731	24348.8
555325.afi	d206043b-fae0-46ce-9062-9c2297d8b929	1944	Region_59	Positive	non-PNI	Geometry	16662.4	5434.6	15825.4	11383.2	203	65532	14860.5	554	189	365	65.88	4479.3	81486	19371.2
555325.afi	27b93f3f-16d9-427c-9e99-4579829e4d8e	1944	Region_60	Positive	non-PNI	Geometry	15844.2	6649.4	19547.1	8210.83	921	58971	19657.5	401	29	372	92.77	4877	76276.4	17286.5

## Sheet: Sheet1
Parent	ROI: 0.46 Âµm per pixel: opal 570: Mean	Num Detections	Positive %						PNI	non-PNI			PNI	non-PNI			PNI	non-PNI
non-PNI	20870.3	485	12.16						18363.1	20870.3			467	485			57.39	12.16
non-PNI	17658.9	301	59.47						21169.5	17658.9			283	301			61.48	59.47
non-PNI	19291.7	368	42.12						18793.3	19291.7			357	368			94.68	42.12
non-PNI	20084.7	1578	98.35						22125.4	20084.7			169	1578			96.45	98.35
non-PNI	20689.6	1143	96.85						13773.9	20689.6			332	1143			90.96	96.85
non-PNI	14705.9	887	87.6						12840.1	14705.9			977	887			80.55	87.6
non-PNI	8074.34	1096	41.79						12892	8074.34			659	1096			87.25	41.79
non-PNI	6990.41	360	31.39						10844.8	6990.41			348	360			73.85	31.39
non-PNI	8706.35	377	53.05						8325.79	8706.35			133	377			37.59	53.05
non-PNI	19710	204	97.06						4074.09	19710			1254	204			18.82	97.06
non-PNI	1193.7	123	0						1168.36	1193.7			693	123			0	0
non-PNI	1057.3	288	0						5552.19	1057.3			355	288			11.83	0
non-PNI	723.223	163	0						5692.54	723.223			1701	163			8.818	0
non-PNI	8772.09	1775	51.44						5395.39	8772.09			81	1775			1.235	51.44
non-PNI	8416.18	2467	47.22						5408.2	8416.18			240	2467			7.917	47.22
non-PNI	7509.16	1411	29.91						7649.03	7509.16			61	1411			34.43	29.91
non-PNI	8871.8	1293	53.83						13087.7	8871.8			137	1293			86.13	53.83
non-PNI	5802.49	319	23.82						6849.79	5802.49			440	319			24.55	23.82
non-PNI	5928.9	174	23.56						7216.18	5928.9			1194	174			29.65	23.56
non-PNI	6030.11	95	18.95						3966.39	6030.11			115	95			2.609	18.95
non-PNI	5258.53	136	7.353						3095.14	5258.53			651	136			0.6144	7.353
non-PNI	1717.7	111	0						4060.13	1717.7			317	111			2.524	0
non-PNI	1928.02	68	0						7465.38	1928.02			362	68			37.57	0
non-PNI	1754.37	88	0						13361.9	1754.37			755	88			55.1	0
non-PNI	2700.8	93	2.151						17556.8	2700.8			237	93			91.14	2.151
non-PNI	15283.4	705	62.41						24723.2	15283.4			166	705			93.98	62.41
non-PNI	15825.4	554	65.88						16366.3	15825.4			318	554			79.25	65.88
non-PNI	19547.1	401	92.77						9888.29	19547.1			862	401			53.13	92.77
PNI	18363.1	467	57.39						12026.1				603				77.78
PNI	21169.5	283	61.48						13903.4				153				74.51
PNI	18793.3	357	94.68						21076.5				687				94.32
PNI	22125.4	169	96.45
PNI	13773.9	332	90.96
PNI	12840.1	977	80.55
PNI	12892	659	87.25
PNI	10844.8	348	73.85
PNI	8325.79	133	37.59
PNI	4074.09	1254	18.82
PNI	1168.36	693	0
PNI	5552.19	355	11.83
PNI	5692.54	1701	8.818
PNI	5395.39	81	1.235
PNI	5408.2	240	7.917
PNI	7649.03	61	34.43
PNI	13087.7	137	86.13
PNI	6849.79	440	24.55
PNI	7216.18	1194	29.65
PNI	3966.39	115	2.609
PNI	3095.14	651	0.6144
PNI	4060.13	317	2.524
PNI	7465.38	362	37.57
PNI	13361.9	755	55.1
PNI	17556.8	237	91.14			Unpaired t test
PNI	24723.2	166	93.98			P value	0.4194
PNI	16366.3	318	79.25			P value summary	ns						Unpaired t test
PNI	9888.29	862	53.13			Significantly different (P < 0.05)?	No						P value	0.3633
PNI	12026.1	603	77.78			One- or two-tailed P value?	Two-tailed						P value summary	ns
PNI	13903.4	153	74.51			t, df	t=0.8133, df=57						Significantly different (P < 0.05)?	No
PNI	21076.5	687	94.32										One- or two-tailed P value?	Two-tailed
													t, df	t=0.9165, df=57
