# Supplementary material for: Spatial Transcriptomics of Perineural Invasion in Pancreatic Ductal Adenocarcinomas
Source: Research Square preprint supplement (doi:10.21203/rs.3.rs-5253213/v1), 2024-12-02
Supplement: Supplementary file 7 [file b6e0742f299a162a7cca5992.xlsx]

## Sheet: FullROI_17ROIs_gr125ls1850_LibS
Supplementary Table 6. Differentially expressed genes in the nerve compartment of PNI foci compared to nerves with no signs of PNI (non-PNI foci) outside the tumour microenvironment.The lines in green represent genes down-regulated and in red represent genes up-regulated.
HUGOSymbol	TargetGroup	AnalyteType	CodeClass	ProbePool	MinCount	MaxCount	MedianCount	GeomeanCount	NumberOfProbesIncluded	NumberOfProbesTotal	GeneID	genes_lowCount_overNsamples	mean_zscore	mean_expr	logFC	AveExpr	t	P.Value	adj.P.Val	B	AvgExp_PGP9.5_PNI	AvgExp_PGP9.5_nonPNI
GPX3	All Targets	RNA	Endogenous	1	6	867	33	54.4031	1	1	2878	FALSE	1.84485	7.3474	-1.87122	7.31786	-5.26025	8.59563e-05	0.0337061	1.49844	6.26055	8.05797
MPZ	All Targets	RNA	Endogenous	1	4	310	54	39.6736	1	1	4359	FALSE	0.772038	6.89968	-1.6749	6.87061	-5.96868	2.13774e-06	0.0035055	4.49914	5.86017	7.57792
CLU	All Targets	RNA	Endogenous	1	3	289	52	47.7224	1	1	1191	FALSE	0.49486	7.14942	-1.01428	7.12706	-4.31977	0.000116233	0.0397789	1.13413	6.50092	7.56536
LPL	All Targets	RNA	Endogenous	1	1	63	18	14.4534	1	1	4023	FALSE	0.860544	5.55672	-1.01353	5.47915	-4.73601	2.47653e-05	0.0193725	2.41735	4.85153	5.91848
TSC22D4	All Targets	RNA	Endogenous	1	3	168	25	28.8315	1	1	81628	FALSE	0.616886	6.45024	-0.967863	6.41013	-4.96412	1.1849e-05	0.0118741	3.09528	5.86319	6.79299
NFATC2	All Targets	RNA	Endogenous	1	3	265	27	28.8505	1	1	4773	FALSE	1.00629	6.45346	-0.961441	6.40954	-3.44314	0.00209923	0.157554	-1.31947	5.87522	6.78358
FFAR2	All Targets	RNA	Endogenous	1	1	42	20	10.8669	1	1	2867	FALSE	0.54567	5.18676	-0.956212	5.08931	-4.15836	0.000153744	0.0440195	0.839758	4.45981	5.52996
KIF1C	All Targets	RNA	Endogenous	1	1	35	18	10.4036	1	1	10749	FALSE	0.782396	5.13079	-0.939466	5.01575	-4.22006	0.00012693	0.0404368	0.989084	4.45688	5.40695
BCAT1	All Targets	RNA	Endogenous	1	1	60	11	8.88772	1	1	586	FALSE	0.735379	4.92976	-0.935693	4.81215	-3.65246	0.000761595	0.0938306	-0.527928	4.21833	5.22782
SLC17A7	All Targets	RNA	Endogenous	1	1	31	9	8.07915	1	1	57030	FALSE	0.839348	4.82269	-0.908139	4.67282	-3.7253	0.000573575	0.0835085	-0.303831	4.13606	5.04856
PDK4	All Targets	RNA	Endogenous	1	4	151	28	26.8027	1	1	5166	FALSE	0.953504	6.355	-0.901319	6.30562	-3.77529	0.000533912	0.0807751	-0.209883	5.77993	6.67361
TLR4	All Targets	RNA	Endogenous	1	1	37	18	10.7816	1	1	7099	FALSE	0.275727	5.17197	-0.893004	5.06282	-4.13397	0.000165803	0.0460115	0.772734	4.52671	5.43809
FKBP5	All Targets	RNA	Endogenous	1	4	184	25	31.074	1	1	2289	FALSE	0.272084	6.55203	-0.884183	6.51366	-3.39768	0.00208891	0.157554	-1.33672	6.00846	6.86729
SAMD4A	All Targets	RNA	Endogenous	1	1	78	17	16.9986	1	1	23034	FALSE	0.217225	5.75434	-0.870545	5.69199	-3.98024	0.000265913	0.0624481	0.387858	5.19599	6.03919
DRD2	All Targets	RNA	Endogenous	1	1	50	17	10.3365	1	1	1813	FALSE	0.621658	5.12612	-0.864514	5.0335	-4.16877	0.000148864	0.0435648	0.865827	4.47637	5.42349
FGGY	All Targets	RNA	Endogenous	1	1	55	26	15.2832	1	1	55277	FALSE	0.346798	5.61648	-0.863484	5.54063	-3.63422	0.000752103	0.0938306	-0.520362	4.96151	5.94601
ARHGAP15	All Targets	RNA	Endogenous	1	4	112	31	24.9106	1	1	55843	FALSE	0.593757	6.25467	-0.86068	6.20139	-4.3061	9.70207e-05	0.0364596	1.25359	5.71505	6.54182
BRD1	All Targets	RNA	Endogenous	1	1	54	20	11.5849	1	1	23774	FALSE	0.821631	5.27225	-0.85759	5.18157	-3.54942	0.000976283	0.109005	-0.739905	4.68698	5.52778
LTBP4	All Targets	RNA	Endogenous	1	8	228	70	54.5321	1	1	8425	FALSE	0.0224876	7.32895	-0.853959	7.307	-4.19145	0.00014187	0.0426507	0.959569	6.78874	7.66978
ADIRF	All Targets	RNA	Endogenous	1	3	175	31	26.1812	1	1	10974	FALSE	-0.0844274	6.322	-0.851969	6.27532	-3.99713	0.000252537	0.0607368	0.430503	5.80264	6.60619
SIT1	All Targets	RNA	Endogenous	1	1	51	15	10.6124	1	1	27240	FALSE	0.402719	5.14182	-0.849781	5.03919	-3.74718	0.000537366	0.0807751	-0.237186	4.51642	5.40513
IP6K3	All Targets	RNA	Endogenous	1	1	42	22	11.2071	1	1	117283	FALSE	0.472232	5.2252	-0.84799	5.11468	-3.74985	0.000533113	0.0807751	-0.229157	4.52901	5.52464
GTSF1	All Targets	RNA	Endogenous	1	1	39	16	10.1994	1	1	121355	FALSE	0.823766	5.11169	-0.84571	4.98708	-3.35088	0.00180102	0.150889	-1.25177	4.44102	5.36932
HCK	All Targets	RNA	Endogenous	1	1	55	19	15.4275	1	1	3055	FALSE	-0.160331	5.61987	-0.843919	5.54661	-4.28909	0.000102328	0.0376691	1.20957	5.04775	5.89581
TTYH1	All Targets	RNA	Endogenous	1	1	117	28	21.2708	1	1	57348	FALSE	-0.180416	6.05003	-0.842525	6.00458	-4.22354	0.000125563	0.0404368	1.02296	5.50486	6.35438
OGFRL1	All Targets	RNA	Endogenous	1	8	221	27	38.1281	1	1	79627	FALSE	0.18096	6.83445	-0.84212	6.80126	-3.92788	0.000325761	0.0682855	0.225985	6.31604	7.14091
C2orf69	All Targets	RNA	Endogenous	1	1	49	11	12.492	1	1	205327	FALSE	0.210857	5.35193	-0.841446	5.2506	-4.04705	0.000216724	0.0553712	0.551	4.77937	5.58045
TMEM115	All Targets	RNA	Endogenous	1	1	33	12	9.61574	1	1	11070	FALSE	0.051074	5.0247	-0.832239	4.90023	-3.3511	0.00175886	0.149652	-1.23532	4.39325	5.25512
INAVA	All Targets	RNA	Endogenous	1	1	93	31	23.7982	1	1	55765	FALSE	0.0273152	6.2045	-0.832048	6.15369	-3.26496	0.00310465	0.183349	-1.68073	5.68541	6.48149
PBOV1	All Targets	RNA	Endogenous	1	1	30	12	7.86531	1	1	59351	FALSE	0.180667	4.79342	-0.816181	4.63966	-3.27977	0.0020877	0.157554	-1.38624	4.131	4.99572
LRRK2	All Targets	RNA	Endogenous	1	1	42	24	13.4674	1	1	120892	FALSE	0.140475	5.44568	-0.814359	5.36461	-3.87405	0.000367116	0.0705916	0.093772	4.85529	5.72113
NPTX2	All Targets	RNA	Endogenous	1	3	137	22	27.3532	1	1	4885	FALSE	0.417548	6.3767	-0.814157	6.33154	-3.85402	0.000395317	0.0720276	0.052024	5.87363	6.65208
PTGES2	All Targets	RNA	Endogenous	1	1	47	17	13.507	1	1	80142	FALSE	0.656872	5.46701	-0.810892	5.38848	-3.82542	0.000425086	0.0734517	-0.0192373	4.86031	5.75821
BBS5	All Targets	RNA	Endogenous	1	1	47	17	13.0484	1	1	129880	FALSE	0.845134	5.40582	-0.810649	5.32098	-3.82244	0.00042892	0.0734517	-0.0328122	4.82213	5.67017
NICN1	All Targets	RNA	Endogenous	1	3	92	45	32.5729	1	1	84276	FALSE	0.282879	6.61592	-0.809585	6.58009	-4.46071	5.96163e-05	0.0256038	1.71014	6.09862	6.91711
SUN1	All Targets	RNA	Endogenous	1	2	74	23	14.2336	1	1	23353	FALSE	0.251908	5.52618	-0.809334	5.44554	-3.72085	0.000581222	0.0838726	-0.302115	4.94675	5.79469
MRPS28	All Targets	RNA	Endogenous	1	1	43	19	13.5026	1	1	28957	FALSE	0.519884	5.45418	-0.808385	5.37217	-3.48237	0.0011705	0.120648	-0.894603	4.81717	5.76066
SEMA4B	All Targets	RNA	Endogenous	1	5	181	39	33.2574	1	1	10509	FALSE	1.08027	6.64429	-0.805332	6.6061	-4.07464	0.000199101	0.0520491	0.654184	6.12157	6.94528
COL28A1	All Targets	RNA	Endogenous	1	3	153	24	27.2024	1	1	340267	FALSE	0.338229	6.37148	-0.799835	6.32572	-3.97723	0.000268362	0.0624481	0.38782	5.8582	6.65297
SFRP5	All Targets	RNA	Endogenous	1	1	66	18	13.8048	1	1	6425	FALSE	0.0983908	5.48057	-0.794688	5.40229	-3.6683	0.000679292	0.0887904	-0.429756	4.92571	5.7359
TMEM176B	All Targets	RNA	Endogenous	1	3	83	19	19.2709	1	1	28959	FALSE	-0.287525	5.90726	-0.793975	5.84586	-3.67463	0.000666672	0.0884222	-0.411738	5.36237	6.18431
MT3	All Targets	RNA	Endogenous	1	3	70	21	18.0483	1	1	4504	FALSE	0.192377	5.82202	-0.787509	5.74991	-3.63674	0.000745626	0.0938306	-0.509247	5.28822	6.07309
ATP1A2	All Targets	RNA	Endogenous	1	4	93	22	18.7813	1	1	477	FALSE	0.679353	5.87401	-0.787311	5.80921	-3.15395	0.00331064	0.187005	-1.75845	5.38648	6.10512
PNMA5	All Targets	RNA	Endogenous	1	1	34	16	10.9838	1	1	114824	FALSE	0.0957801	5.19298	-0.785051	5.09626	-3.81407	0.000439844	0.073462	-0.059453	4.58998	5.45066
HOXA3	All Targets	RNA	Endogenous	1	1	52	18	10.682	1	1	3200	FALSE	0.46047	5.16359	-0.783094	5.05785	-3.40411	0.00146638	0.134719	-1.08709	4.55404	5.41052
NPAP1L	All Targets	RNA	Endogenous	1	2	98	24	20.172	1	1	729159	FALSE	0.533293	5.97242	-0.780459	5.91273	-3.78454	0.00048059	0.0780719	-0.123768	5.42441	6.25455
ARMH3	All Targets	RNA	Endogenous	1	1	39	14	11.4002	1	1	79591	FALSE	-0.108451	5.22703	-0.777557	5.12674	-3.66831	0.000679255	0.0887904	-0.434046	4.70472	5.42215
CCR10	All Targets	RNA	Endogenous	1	1	48	28	17.8078	1	1	2826	FALSE	0.233232	5.81442	-0.776832	5.74445	-3.90349	0.000335828	0.0682855	0.188826	5.27864	6.07052
CD72	All Targets	RNA	Endogenous	1	1	47	21	14.6517	1	1	971	FALSE	0.202715	5.55424	-0.776445	5.47629	-3.62359	0.000775073	0.0938306	-0.537984	4.99006	5.81665
WSB1	All Targets	RNA	Endogenous	1	6	194	48	45.1394	1	1	26118	FALSE	0.484828	7.06473	-0.775754	7.03824	-4.04522	0.000217948	0.0553712	0.576042	6.56493	7.36955
OR4S2	All Targets	RNA	Endogenous	1	2	36	15	12.6053	1	1	219431	FALSE	-0.111927	5.35803	-0.772376	5.25404	-3.6578	0.000700706	0.0909305	-0.453386	4.82892	5.55162
SORT1	All Targets	RNA	Endogenous	1	1	56	26	16.9718	1	1	6272	FALSE	0.328178	5.7529	-0.77106	5.68629	-3.47077	0.00122922	0.122236	-0.933247	5.22235	6.01105
TYW1	All Targets	RNA	Endogenous	1	1	44	19	13.2505	1	1	55253	FALSE	0.182734	5.43709	-0.767032	5.35702	-3.47699	0.00118885	0.121843	-0.906149	4.84755	5.71365
NLRP4	All Targets	RNA	Endogenous	1	1	40	17	11.7611	1	1	147945	FALSE	-0.0671251	5.27079	-0.763903	5.17983	-3.67885	0.000658408	0.0882881	-0.401469	4.6838	5.52705
MPHOSPH10	All Targets	RNA	Endogenous	1	3	56	21	18.8102	1	1	10199	FALSE	0.970864	5.87759	-0.761846	5.81176	-3.26876	0.0023313	0.164265	-1.47237	5.37837	6.11514
CNTD1	All Targets	RNA	Endogenous	1	1	44	15	9.09854	1	1	124817	FALSE	0.717596	4.95624	-0.76178	4.84555	-3.42907	0.001365	0.12891	-1.02694	4.35372	5.18982
NRL	All Targets	RNA	Endogenous	1	1	45	21	13.5211	1	1	4901	FALSE	0.29534	5.45856	-0.761346	5.38563	-3.87187	0.00036955	0.0705916	0.0998458	4.90026	5.72539
SHB	All Targets	RNA	Endogenous	1	1	52	20	14.0301	1	1	6461	FALSE	-0.182765	5.49454	-0.75976	5.41451	-3.72501	0.000574069	0.0835085	-0.283525	4.95389	5.73694
UBL4B	All Targets	RNA	Endogenous	1	2	40	16	12.3128	1	1	164153	FALSE	0.806402	5.32686	-0.757287	5.22731	-3.60642	0.000815225	0.0967436	-0.586509	4.72492	5.57899
MYH15	All Targets	RNA	Endogenous	1	1	41	13	11.4495	1	1	22989	FALSE	0.210814	5.23632	-0.754274	5.13849	-3.62698	0.00076739	0.0938306	-0.534889	4.69448	5.44929
CAPN3	All Targets	RNA	Endogenous	1	2	45	15	10.8664	1	1	825	FALSE	0.304598	5.16872	-0.748618	5.065	-3.3462	0.00172992	0.148592	-1.22657	4.62729	5.37139
C1S	All Targets	RNA	Endogenous	1	5	140	35	29.5339	1	1	716	FALSE	0.123834	6.48088	-0.742989	6.44135	-3.64717	0.000723035	0.0931579	-0.477511	5.99115	6.75648
ARHGEF35	All Targets	RNA	Endogenous	1	3	49	25	17.0553	1	1	445328	FALSE	0.620834	5.74654	-0.73803	5.66817	-3.11026	0.00347396	0.191046	-1.81222	5.21467	5.98563
C12orf56	All Targets	RNA	Endogenous	1	4	41	15	13.2519	1	1	115749	FALSE	0.354183	5.42377	-0.737727	5.31523	-3.49089	0.00114198	0.119076	-0.873992	4.89732	5.60777
MLYCD	All Targets	RNA	Endogenous	1	1	59	16	14.2578	1	1	23417	FALSE	0.0234573	5.5226	-0.737166	5.44227	-3.67826	0.000659547	0.0882881	-0.403268	4.97981	5.76599
ADO	All Targets	RNA	Endogenous	1	1	51	15	12.8345	1	1	84890	FALSE	-0.0119826	5.38402	-0.735017	5.2941	-3.68195	0.000652386	0.0882881	-0.390349	4.87764	5.58562
NELFA	All Targets	RNA	Endogenous	1	1	39	12	9.42381	1	1	7469	FALSE	0.533454	5.01534	-0.734901	4.87555	-3.29389	0.00200622	0.154991	-1.35093	4.46658	5.16183
TTLL2	All Targets	RNA	Endogenous	1	1	66	20	16.7301	1	1	83887	FALSE	-0.186374	5.72758	-0.730669	5.65924	-3.92929	0.000310543	0.0682855	0.256958	5.20984	5.97383
STIL	All Targets	RNA	Endogenous	1	1	47	18	12.7579	1	1	6491	FALSE	0.0139753	5.37075	-0.727901	5.28762	-3.86298	0.000379609	0.0705916	0.0738386	4.87972	5.57314
PRPS1	All Targets	RNA	Endogenous	1	1	48	20	16.2993	1	1	5631	FALSE	0.182638	5.69512	-0.727703	5.62974	-3.47329	0.00120165	0.122236	-0.915903	5.1798	5.9447
SNX22	All Targets	RNA	Endogenous	1	2	44	22	13.163	1	1	79856	FALSE	0.0708691	5.41278	-0.726521	5.31404	-3.32011	0.00186286	0.152738	-1.28887	4.81879	5.66072
SLC52A1	All Targets	RNA	Endogenous	1	2	29	16	10.6727	1	1	55065	FALSE	-0.283722	5.14298	-0.725667	5.02946	-3.49391	0.00113202	0.119076	-0.867863	4.56346	5.35567
NRBP2	All Targets	RNA	Endogenous	1	4	108	32	28.2791	1	1	340371	FALSE	0.220216	6.42044	-0.723798	6.37808	-3.77818	0.000489822	0.0781895	-0.137526	5.93208	6.69028
ACADSB	All Targets	RNA	Endogenous	1	1	45	15	13.0193	1	1	36	FALSE	0.847671	5.40771	-0.722518	5.31585	-3.22107	0.00246138	0.16606	-1.52751	4.89003	5.61392
SERPINA5	All Targets	RNA	Endogenous	1	3	42	11	11.5544	1	1	5104	FALSE	0.723946	5.24722	-0.721749	5.13012	-3.17696	0.00278299	0.175071	-1.62633	4.72034	5.41696
NSMCE3	All Targets	RNA	Endogenous	1	1	46	14	11.9994	1	1	56160	FALSE	0.461009	5.29871	-0.719275	5.20281	-3.20934	0.00254329	0.168661	-1.55206	4.76672	5.50808
CCT6B	All Targets	RNA	Endogenous	1	1	39	14	10.982	1	1	10693	FALSE	0.387895	5.19494	-0.717277	5.08915	-3.26403	0.00218224	0.159365	-1.42172	4.65235	5.39492
SAYSD1	All Targets	RNA	Endogenous	1	1	40	16	12.7336	1	1	55776	FALSE	0.436208	5.38308	-0.71697	5.29576	-3.46648	0.00122551	0.122236	-0.932733	4.8518	5.60653
ADAM22	All Targets	RNA	Endogenous	1	1	45	22	13.9855	1	1	53616	FALSE	0.540293	5.49299	-0.716835	5.41248	-3.86579	0.000376393	0.0705916	0.0846277	4.99799	5.70263
APCDD1	All Targets	RNA	Endogenous	1	2	111	41	22.6435	1	1	147495	FALSE	0.172432	6.1286	-0.714146	6.08299	-3.50253	0.00110408	0.117149	-0.842945	5.64234	6.39145
DCAF12L1	All Targets	RNA	Endogenous	1	1	38	14	10.9907	1	1	139170	FALSE	0.645808	5.18429	-0.710876	5.08497	-3.5518	0.000956593	0.109005	-0.720913	4.67361	5.37292
FXYD1	All Targets	RNA	Endogenous	1	1	215	31	27.3523	1	1	5348	FALSE	0.237429	6.39656	-0.70834	6.35478	-3.34774	0.00172237	0.148592	-1.22594	5.92647	6.6546
EXD1	All Targets	RNA	Endogenous	1	3	46	18	17.0377	1	1	161829	FALSE	-0.424883	5.74815	-0.708035	5.66811	-3.30016	0.00197104	0.154606	-1.33684	5.21374	5.98617
TCP10L2	All Targets	RNA	Endogenous	1	1	40	10	9.16076	1	1	401285	FALSE	-0.527209	4.96096	-0.707803	4.84191	-3.3151	0.00188947	0.152986	-1.30097	4.41205	5.14281
JAKMIP2	All Targets	RNA	Endogenous	1	1	60	20	16.2139	1	1	9832	FALSE	-0.53088	5.6875	-0.707508	5.61976	-3.27566	0.00211203	0.157554	-1.39829	5.14599	5.9514
OR6S1	All Targets	RNA	Endogenous	1	1	44	15	14.5537	1	1	341799	FALSE	0.309791	5.54597	-0.707431	5.47032	-3.75869	0.000519214	0.0807378	-0.190618	5.04772	5.76614
EPOR	All Targets	RNA	Endogenous	1	2	33	17	12.0107	1	1	2057	FALSE	0.0956089	5.29375	-0.707412	5.19245	-3.16865	0.00284793	0.175712	-1.64902	4.72016	5.52306
RBM15B	All Targets	RNA	Endogenous	1	1	58	20	12.9755	1	1	29890	FALSE	0.0891282	5.40291	-0.702562	5.31414	-3.29539	0.00199775	0.154991	-1.34744	4.88554	5.61416
NAT14	All Targets	RNA	Endogenous	1	1	42	15	13.3873	1	1	57106	FALSE	0.740711	5.44127	-0.702495	5.35957	-3.42668	0.00137442	0.129124	-1.03065	4.92259	5.66546
CLRN1	All Targets	RNA	Endogenous	1	1	43	21	12.4618	1	1	7401	FALSE	0.38346	5.34428	-0.695607	5.25846	-3.11629	0.00329078	0.186664	-1.76908	4.85361	5.54186
SIK2	All Targets	RNA	Endogenous	1	1	52	16	11.2805	1	1	23235	FALSE	0.138072	5.23647	-0.695225	5.13279	-3.21093	0.00253209	0.168538	-1.54733	4.72569	5.41777
EGFR	All Targets	RNA	Endogenous	1	1	39	14	11.9901	1	1	1956	FALSE	-0.389586	5.29225	-0.694548	5.19309	-3.38042	0.00156918	0.140821	-1.143	4.81163	5.46011
NDRG2	All Targets	RNA	Endogenous	1	3	118	29	25.4377	1	1	57447	FALSE	-0.00516956	6.27714	-0.690057	6.23154	-3.49087	0.00114204	0.119076	-0.872374	5.82443	6.51652
NR1I3	All Targets	RNA	Endogenous	1	1	39	18	13.3214	1	1	9970	FALSE	-0.0300097	5.43004	-0.689486	5.34126	-3.68998	0.000637035	0.0877163	-0.368276	4.94085	5.62154
LYL1	All Targets	RNA	Endogenous	1	1	47	19	14.3344	1	1	4066	FALSE	0.180403	5.52487	-0.686844	5.44301	-3.46238	0.00124012	0.122236	-0.942799	5.01565	5.74216
CNTN2	All Targets	RNA	Endogenous	1	1	67	27	17.7941	1	1	6900	FALSE	0.559827	5.81058	-0.686552	5.7499	-3.76919	0.000503179	0.079617	-0.163284	5.34654	6.03225
FES	All Targets	RNA	Endogenous	1	1	50	18	12.9451	1	1	2242	FALSE	0.0298376	5.39116	-0.683091	5.30881	-3.51728	0.00105778	0.114213	-0.805836	4.89419	5.59904
TMOD2	All Targets	RNA	Endogenous	1	5	138	48	36.2661	1	1	29767	FALSE	-0.0548521	6.76055	-0.682694	6.72755	-3.83029	0.000418905	0.0734517	0.000483956	6.32029	7.01264
LZTR1	All Targets	RNA	Endogenous	1	1	55	22	14.5905	1	1	8216	FALSE	0.114569	5.55877	-0.682311	5.48858	-3.5485	0.000965867	0.109005	-0.727497	5.09331	5.76527
SUFU	All Targets	RNA	Endogenous	1	1	46	23	13.3379	1	1	51684	FALSE	0.0798843	5.44159	-0.682285	5.36317	-3.35321	0.00169574	0.148484	-1.21134	4.93477	5.66304
TMEM45A	All Targets	RNA	Endogenous	1	1	41	19	11.9078	1	1	55076	FALSE	-0.0974453	5.29305	-0.681589	5.20887	-3.3543	0.00169053	0.148484	-1.20622	4.77723	5.51101
PRKAR2A	All Targets	RNA	Endogenous	1	1	45	17	13.3186	1	1	5576	FALSE	-0.414578	5.42936	-0.680504	5.34166	-3.22305	0.00244785	0.16606	-1.52243	4.93663	5.62518
MFAP3	All Targets	RNA	Endogenous	1	1	44	21	13.7237	1	1	4238	FALSE	-0.473171	5.47526	-0.680385	5.39339	-3.18923	0.00268978	0.1739	-1.6015	4.97929	5.68326
GRIK2	All Targets	RNA	Endogenous	1	3	61	23	15.8066	1	1	2898	FALSE	-0.753719	5.64345	-0.678673	5.56809	-3.27337	0.00212569	0.157791	-1.40012	5.11877	5.88261
CCDC96	All Targets	RNA	Endogenous	1	2	41	19	13.6864	1	1	257236	FALSE	-0.0778157	5.458	-0.678386	5.36333	-3.39825	0.0014912	0.13585	-1.09964	4.98333	5.62933
RAD51AP2	All Targets	RNA	Endogenous	1	1	48	21	15.3233	1	1	729475	FALSE	0.0252393	5.61067	-0.674925	5.53395	-3.62437	0.000773301	0.0938306	-0.535373	5.1337	5.81412
ADD2	All Targets	RNA	Endogenous	1	1	55	21	14.5798	1	1	119	FALSE	0.0359075	5.54395	-0.673089	5.46708	-3.43066	0.00135879	0.12891	-1.02064	5.0592	5.7526
DCLK3	All Targets	RNA	Endogenous	1	2	56	18	15.6868	1	1	85443	FALSE	0.235514	5.64775	-0.672849	5.55255	-3.18025	0.00275772	0.175071	-1.63118	5.13321	5.84609
RD3	All Targets	RNA	Endogenous	1	1	42	15	10.6002	1	1	343035	FALSE	-0.0895938	5.13518	-0.672681	5.03734	-3.24699	0.00228919	0.163783	-1.462	4.6237	5.3269
PHF8	All Targets	RNA	Endogenous	1	3	45	17	14.5393	1	1	23133	FALSE	0.238229	5.53635	-0.671994	5.45211	-3.06942	0.0037416	0.199678	-1.88122	4.98022	5.78243
FADS3	All Targets	RNA	Endogenous	1	2	88	21	21.1996	1	1	3995	FALSE	-0.0950122	6.03522	-0.669451	5.98121	-3.17988	0.00276059	0.175071	-1.62745	5.58636	6.2576
B3GALNT1	All Targets	RNA	Endogenous	1	1	49	19	13.3824	1	1	8706	FALSE	0.135595	5.43415	-0.668794	5.35506	-3.41363	0.00142687	0.133357	-1.06254	4.9565	5.63404
PPP1R21	All Targets	RNA	Endogenous	1	1	58	20	14.9161	1	1	129285	FALSE	-0.428499	5.57361	-0.668685	5.5006	-3.23589	0.00236148	0.164531	-1.49317	5.10973	5.77421
FXYD4	All Targets	RNA	Endogenous	1	1	44	19	11.4449	1	1	53828	FALSE	0.38932	5.23758	-0.66572	5.13973	-3.17681	0.0027842	0.175071	-1.62741	4.72165	5.43239
CMBL	All Targets	RNA	Endogenous	1	3	40	16	13.3862	1	1	134147	FALSE	0.379109	5.43084	-0.664075	5.3279	-3.24285	0.00231588	0.163819	-1.47399	4.953	5.59034
MTMR7	All Targets	RNA	Endogenous	1	1	38	20	13.7401	1	1	9108	FALSE	0.159659	5.47221	-0.662876	5.38556	-3.30612	0.00193811	0.154606	-1.32431	4.97446	5.67333
NXPH4	All Targets	RNA	Endogenous	1	2	39	18	12.4984	1	1	11247	FALSE	0.68144	5.34342	-0.662511	5.25292	-3.12169	0.00324229	0.186664	-1.76103	4.84383	5.53929
NKAIN2	All Targets	RNA	Endogenous	1	1	39	15	12.0187	1	1	154215	FALSE	0.246489	5.3058	-0.660481	5.20561	-3.11108	0.00333823	0.187586	-1.78039	4.82254	5.47375
UCMA	All Targets	RNA	Endogenous	1	1	46	25	15.8752	1	1	221044	FALSE	0.395617	5.67436	-0.656068	5.60539	-3.28237	0.00207246	0.157554	-1.38952	5.19924	5.8897
MTX1	All Targets	RNA	Endogenous	1	2	52	20	15.0913	1	1	4580	FALSE	0.445226	5.58437	-0.655878	5.50682	-3.0973	0.00346688	0.191046	-1.81626	5.09523	5.79493
PHLDA3	All Targets	RNA	Endogenous	1	1	85	25	22.7619	1	1	23612	FALSE	0.0692183	6.14253	-0.655034	6.09322	-3.30794	0.00192815	0.154606	-1.32732	5.69867	6.3694
TMEM225B	All Targets	RNA	Endogenous	1	1	42	19	14.7801	1	1	100289187	FALSE	0.221702	5.57714	-0.653913	5.50297	-3.17118	0.00282804	0.175712	-1.65378	5.10335	5.7827
MUC3A	All Targets	RNA	Endogenous	1	1	40	17	12.6871	1	1	4584	FALSE	0.0181523	5.37026	-0.653457	5.27106	-3.22437	0.00243884	0.16606	-1.51856	4.8744	5.54872
JADE2	All Targets	RNA	Endogenous	1	1	47	18	14.135	1	1	23338	FALSE	0.490695	5.50767	-0.652017	5.42314	-3.34163	0.00175254	0.149652	-1.23811	5.03286	5.69634
CFD	All Targets	RNA	Endogenous	1	4	92	18	19.9834	1	1	1675	FALSE	0.235241	5.95455	-0.651985	5.89063	-3.15031	0.00299616	0.180752	-1.69638	5.48602	6.17385
RBM27	All Targets	RNA	Endogenous	1	2	50	23	17.149	1	1	54439	FALSE	-0.180334	5.74937	-0.651858	5.682	-3.40599	0.00145848	0.134719	-1.08137	5.27788	5.96489
DHX15	All Targets	RNA	Endogenous	1	2	48	14	13.7314	1	1	1665	FALSE	-0.00306877	5.4624	-0.651348	5.37982	-3.13676	0.00311037	0.183349	-1.72373	4.96801	5.66809
SCNN1G	All Targets	RNA	Endogenous	1	1	49	16	12.5332	1	1	6340	FALSE	0.164404	5.36649	-0.650555	5.28316	-3.16762	0.00285603	0.175712	-1.65855	4.85319	5.58414
SNRNP25	All Targets	RNA	Endogenous	1	1	51	18	12.2627	1	1	79622	FALSE	0.381108	5.3244	-0.64844	5.24091	-3.16721	0.00285926	0.175712	-1.65354	4.81902	5.53622
CCER2	All Targets	RNA	Endogenous	1	1	47	19	13.3198	1	1	643669	FALSE	0.317795	5.42615	-0.647543	5.3395	-3.12631	0.00320128	0.186049	-1.74921	4.95374	5.60953
DBH	All Targets	RNA	Endogenous	1	1	42	17	13.4743	1	1	1621	FALSE	-1.03808	5.43902	-0.647416	5.3568	-3.45597	0.00126328	0.123842	-0.958108	4.97847	5.62163
MAL	All Targets	RNA	Endogenous	1	5	164	55	40.5547	1	1	4118	FALSE	0.199884	6.91582	-0.640065	6.88751	-3.20509	0.0025736	0.170046	-1.58617	6.50636	7.15432
TBRG4	All Targets	RNA	Endogenous	1	2	61	18	15.6961	1	1	9238	FALSE	0.643776	5.64068	-0.631815	5.55651	-3.13763	0.00310293	0.183349	-1.73214	5.18609	5.81581
ZNF711	All Targets	RNA	Endogenous	1	2	50	23	16.0132	1	1	7552	FALSE	-0.353446	5.659	-0.631341	5.58171	-3.3343	0.00178939	0.150828	-1.2575	5.21152	5.84084
CRYZL1	All Targets	RNA	Endogenous	1	1	56	26	17.3258	1	1	9946	FALSE	0.676408	5.77581	-0.630667	5.71151	-3.14817	0.00301399	0.18099	-1.70455	5.31786	5.98707
FABP4	All Targets	RNA	Endogenous	1	1	40	24	15.0007	1	1	2167	FALSE	0.386185	5.58497	-0.629069	5.50817	-3.17704	0.00278239	0.175071	-1.63468	5.11375	5.78427
TRERF1	All Targets	RNA	Endogenous	1	1	37	17	11.8664	1	1	55809	FALSE	0.210122	5.2756	-0.626928	5.18137	-3.11732	0.00328147	0.186664	-1.7669	4.84654	5.41574
CHRM1	All Targets	RNA	Endogenous	1	1	40	19	11.9355	1	1	1128	FALSE	0.30543	5.29775	-0.62572	5.20941	-3.09436	0.00349491	0.191615	-1.83042	4.80938	5.48943
SPAG8	All Targets	RNA	Endogenous	1	1	44	16	12.3941	1	1	26206	FALSE	0.317693	5.3504	-0.625227	5.26827	-3.12558	0.00320774	0.186049	-1.75535	4.85162	5.55993
ZC3H13	All Targets	RNA	Endogenous	1	1	43	22	14.3067	1	1	23091	FALSE	-0.0988944	5.51824	-0.624609	5.44564	-3.34933	0.00171457	0.148592	-1.2196	5.06249	5.71385
NUMBL	All Targets	RNA	Endogenous	1	1	75	18	14.4666	1	1	9253	FALSE	-0.161524	5.53791	-0.624388	5.46893	-3.32117	0.00185727	0.152738	-1.2883	5.10867	5.72111
TGFBR2	All Targets	RNA	Endogenous	1	3	138	30	27.6743	1	1	7048	FALSE	0.503866	6.3948	-0.623893	6.35096	-3.19076	0.00267839	0.173787	-1.60894	5.97248	6.61589
GSC	All Targets	RNA	Endogenous	1	1	51	29	18.2971	1	1	145258	FALSE	-0.257598	5.84471	-0.621658	5.78223	-3.29311	0.00201064	0.154991	-1.3637	5.39313	6.05461
NME7	All Targets	RNA	Endogenous	1	1	62	22	16.7502	1	1	29922	FALSE	-0.355834	5.73038	-0.621536	5.66005	-3.10596	0.00338546	0.189062	-1.80471	5.28145	5.92507
HHATL	All Targets	RNA	Endogenous	1	1	46	23	15.3357	1	1	57467	FALSE	-0.190149	5.61253	-0.619938	5.5346	-3.33088	0.00180685	0.150889	-1.26827	5.15384	5.80113
GAS6	All Targets	RNA	Endogenous	1	1	61	23	16.0327	1	1	2621	FALSE	-0.394918	5.66833	-0.619085	5.60176	-3.10064	0.00343525	0.190077	-1.80912	5.24571	5.85099
CNTN3	All Targets	RNA	Endogenous	1	1	47	23	13.8672	1	1	5067	FALSE	0.311364	5.49038	-0.617887	5.4172	-3.12949	0.00317336	0.185246	-1.74893	5.03321	5.686
AFF3	All Targets	RNA	Endogenous	1	3	39	18	14.5394	1	1	3899	FALSE	0.289543	5.54445	-0.617864	5.44419	-3.20051	0.00260667	0.171602	-1.57619	5.06284	5.71113
CCDC28B	All Targets	RNA	Endogenous	1	1	32	10	9.41137	1	1	79140	FALSE	-0.0427291	4.98592	-0.617662	4.86662	-3.17583	0.00279173	0.175071	-1.62963	4.52684	5.10446
COX7A1	All Targets	RNA	Endogenous	1	1	47	23	14.9914	1	1	1346	FALSE	0.194265	5.58087	-0.615104	5.50411	-3.14708	0.00302308	0.18099	-1.70797	5.12282	5.77101
IZUMO1R	All Targets	RNA	Endogenous	1	1	40	19	15.4586	1	1	390243	FALSE	0.105537	5.62422	-0.614606	5.5435	-3.26459	0.00217884	0.159365	-1.43262	5.21268	5.77507
ATP1B2	All Targets	RNA	Endogenous	1	1	38	19	12.7556	1	1	482	FALSE	0.479049	5.3747	-0.610862	5.28872	-3.07967	0.00363823	0.196486	-1.86101	4.89826	5.56204
EN1	All Targets	RNA	Endogenous	1	2	41	18	14.1261	1	1	2019	FALSE	0.140106	5.49729	-0.607903	5.41448	-3.10176	0.00342477	0.190077	-1.80862	5.05914	5.66321
SUPT20H	All Targets	RNA	Endogenous	1	1	44	20	14.9626	1	1	55578	FALSE	-0.196569	5.5831	-0.606458	5.50726	-3.16176	0.0029028	0.177494	-1.67407	5.14126	5.76346
FZD8	All Targets	RNA	Endogenous	1	1	43	17	15.4707	1	1	8325	FALSE	0.24344	5.62682	-0.604824	5.54595	-3.30463	0.00194626	0.154606	-1.33816	5.21836	5.77526
C1R	All Targets	RNA	Endogenous	1	1	102	25	20.84	1	1	715	FALSE	-0.181588	6.02131	-0.602115	5.97199	-3.16663	0.00286392	0.175712	-1.6627	5.61951	6.21873
RETSAT	All Targets	RNA	Endogenous	1	2	50	25	18.4648	1	1	54884	FALSE	0.282767	5.85014	-0.59467	5.78648	-3.08575	0.00357827	0.193829	-1.8554	5.42464	6.03976
TMSB4Y	All Targets	RNA	Endogenous	1	1	46	28	16.8826	1	1	9087	FALSE	0.0118561	5.73986	-0.567417	5.67742	-3.18199	0.00274446	0.175071	-1.63079	5.33747	5.91538
GALNTL5	All Targets	RNA	Endogenous	1	7	98	37	29.6881	1	1	168391	FALSE	-1.18078	6.48489	-0.566089	6.4397	-3.43187	0.00135407	0.12891	-1.03555	6.0999	6.67756
KRTAP5-8	All Targets	RNA	Endogenous	1	1	77	29	23.8654	1	1	57830	FALSE	-0.0772175	6.20618	-0.551877	6.1545	-3.0783	0.00365197	0.196626	-1.903	5.82474	6.38532
COA4	All Targets	RNA	Endogenous	1	4	51	28	23.5305	1	1	51287	FALSE	0.0616966	6.17036	0.515412	6.11187	3.13211	0.00315056	0.184512	-1.77691	6.40813	5.90448
EPC1	All Targets	RNA	Endogenous	1	10	211	38	46.0625	1	1	80314	FALSE	-0.80855	7.09566	0.516528	7.06453	3.08892	0.00354738	0.193101	-1.88685	7.34014	6.87161
EOMES	All Targets	RNA	Endogenous	1	5	68	22	23.6191	1	1	8320	FALSE	-0.123716	6.17431	0.517591	6.11556	3.15429	0.00296343	0.179981	-1.74048	6.44109	5.88769
RNF24	All Targets	RNA	Endogenous	1	7	49	22	20.7142	1	1	11237	FALSE	-0.531574	5.99905	0.528731	5.93049	3.11334	0.00331753	0.187005	-1.83071	6.25076	5.70631
SLC39A1	All Targets	RNA	Endogenous	1	6	87	25	23.1545	1	1	27173	FALSE	-0.864472	6.14585	0.531317	6.08699	3.07723	0.00366261	0.196626	-1.90522	6.39305	5.87274
OR3A3	All Targets	RNA	Endogenous	1	6	42	18	16.4588	1	1	8392	FALSE	-0.275158	5.69318	0.542937	5.60658	3.13484	0.00312695	0.183726	-1.76441	5.92847	5.38125
SMARCA2	All Targets	RNA	Endogenous	1	7	57	23	21.5945	1	1	6595	FALSE	-0.437307	6.05266	0.543337	5.98769	3.40343	0.00146924	0.134719	-1.11736	6.30974	5.76226
GNAS	All Targets	RNA	Endogenous	1	16	225	59	55.0208	1	1	2778	FALSE	0.254933	7.33967	0.545455	7.31424	3.15494	0.00295809	0.179981	-1.73724	7.61291	7.10517
DRD1	All Targets	RNA	Endogenous	1	7	45	17	17.1165	1	1	1812	FALSE	0.227144	5.74516	0.545767	5.66073	3.11707	0.00328371	0.186664	-1.80822	6.00275	5.42132
ZNF346	All Targets	RNA	Endogenous	1	10	135	39	42.8135	1	1	23567	FALSE	-1.45509	6.99144	0.546072	6.95817	3.19324	0.00265992	0.173306	-1.63061	7.25609	6.74962
ANTKMT	All Targets	RNA	Endogenous	1	10	78	32	31.71	1	1	65990	FALSE	-0.683829	6.5747	0.547325	6.5302	3.43338	0.00134819	0.12891	-1.04347	6.84028	6.31315
WRN	All Targets	RNA	Endogenous	1	7	36	17	15.6631	1	1	7486	FALSE	0.0789327	5.63447	0.557915	5.53566	3.11787	0.00327653	0.186664	-1.81282	5.87393	5.29888
CEP43	All Targets	RNA	Endogenous	1	3	40	19	15.7943	1	1	11116	FALSE	-0.0518848	5.64085	0.560236	5.55521	3.30196	0.00196102	0.154606	-1.35002	5.89468	5.31759
CHST1	All Targets	RNA	Endogenous	1	9	59	18	19.6636	1	1	8534	FALSE	0.136409	5.93108	0.56091	5.85449	3.22275	0.00244989	0.16606	-1.56484	6.19039	5.61936
EVL	All Targets	RNA	Endogenous	1	9	84	31	28.71	1	1	51466	FALSE	-0.249751	6.43826	0.561233	6.39027	3.32328	0.00184622	0.152738	-1.32188	6.70056	6.17308
C16orf78	All Targets	RNA	Endogenous	1	4	58	33	25.8838	1	1	123970	FALSE	-0.753857	6.30067	0.562487	6.24656	3.23575	0.00236244	0.164531	-1.52102	6.58459	6.00993
ZNF589	All Targets	RNA	Endogenous	1	3	41	19	17.2999	1	1	51385	FALSE	0.177645	5.76402	0.564278	5.68069	3.2379	0.00234824	0.164531	-1.52099	6.04274	5.42725
PPIE	All Targets	RNA	Endogenous	1	4	43	21	16.8673	1	1	10450	FALSE	-0.46264	5.72935	0.566523	5.64658	3.14511	0.00303953	0.18099	-1.73471	5.99446	5.40307
CCT2	All Targets	RNA	Endogenous	1	6	62	21	20.91	1	1	10576	FALSE	0.126766	6.01045	0.567004	5.94298	3.43157	0.00135523	0.12891	-1.04731	6.29264	5.69822
ISLR2	All Targets	RNA	Endogenous	1	4	39	16	14.1148	1	1	57611	FALSE	0.244846	5.49319	0.568399	5.39569	3.09047	0.00353237	0.193082	-1.85326	5.73986	5.15477
ATG14	All Targets	RNA	Endogenous	1	7	70	27	25.3466	1	1	22863	FALSE	-0.438959	6.26981	0.568579	6.2149	3.50495	0.00109636	0.117018	-0.860075	6.52874	5.99522
ANKRD37	All Targets	RNA	Endogenous	1	7	46	17	17.5188	1	1	353322	FALSE	0.188801	5.77545	0.569769	5.69342	3.17461	0.00280126	0.175071	-1.67291	6.01576	5.46777
PDCD4	All Targets	RNA	Endogenous	1	13	351	74	77.6048	1	1	27250	FALSE	-0.533744	7.82642	0.569785	7.80789	3.24436	0.0023061	0.163783	-1.50171	8.13463	7.57917
ASIC5	All Targets	RNA	Endogenous	1	5	69	21	20.8103	1	1	51802	FALSE	0.220563	6.00766	0.570536	5.93827	3.11929	0.00326376	0.186664	-1.79264	6.28354	5.69659
SLC3A2	All Targets	RNA	Endogenous	1	6	83	24	24.0783	1	1	6520	FALSE	0.398082	6.20053	0.572953	6.14295	3.38278	0.00155865	0.140574	-1.16501	6.49721	5.89497
PCSK6	All Targets	RNA	Endogenous	1	4	51	28	23.6672	1	1	5046	FALSE	-0.458045	6.1833	0.575344	6.1212	3.29389	0.00200621	0.154991	-1.3747	6.45653	5.88647
EEF1AKMT2	All Targets	RNA	Endogenous	1	3	45	17	15.6361	1	1	399818	FALSE	0.266395	5.62879	0.576576	5.54098	3.25202	0.00225711	0.162206	-1.47337	5.86136	5.31671
TIMP2	All Targets	RNA	Endogenous	1	10	204	54	45.4229	1	1	7077	FALSE	0.352931	7.07244	0.576926	7.04248	3.33484	0.00178664	0.150828	-1.29205	7.38328	6.80391
DLGAP1	All Targets	RNA	Endogenous	1	8	43	15	18.8525	1	1	9229	FALSE	0.14052	5.87409	0.57728	5.79599	3.10966	0.00335123	0.187731	-1.83136	6.1232	5.56694
RPL28	All Targets	RNA	Endogenous	1	16	550	44	59.552	1	1	6158	FALSE	0.301301	7.45368	0.578481	7.42949	3.31796	0.00187423	0.152974	-1.33387	7.77106	7.19039
CCDC122	All Targets	RNA	Endogenous	1	6	45	16	16.4778	1	1	160857	FALSE	0.221375	5.69532	0.579256	5.60893	3.10333	0.00341003	0.189846	-1.83728	5.96786	5.35769
ARID5B	All Targets	RNA	Endogenous	1	6	58	23	18.9941	1	1	84159	FALSE	-0.184008	5.883	0.581383	5.8103	3.15062	0.00299364	0.180752	-1.72692	6.16935	5.55896
RPS16	All Targets	RNA	Endogenous	1	30	539	99	105.14	1	1	6217	FALSE	0.126738	8.25393	0.583692	8.24055	3.07099	0.00372556	0.199411	-1.90599	8.59518	7.9923
CDKN1B	All Targets	RNA	Endogenous	1	4	136	32	28.6582	1	1	1027	FALSE	-0.289676	6.44693	0.584791	6.39733	3.22124	0.00246026	0.16606	-1.55619	6.80037	6.1152
EPSTI1	All Targets	RNA	Endogenous	1	4	45	24	19.7829	1	1	94240	FALSE	-0.366191	5.93774	0.587007	5.86803	3.5811	0.000878069	0.102403	-0.653055	6.20234	5.63401
RPLP0	All Targets	RNA	Endogenous	1	14	613	51	56.5076	1	1	6175	FALSE	0.195529	7.37867	0.589941	7.35413	3.17575	0.0027924	0.175071	-1.68153	7.74378	7.08137
PPP2R2A	All Targets	RNA	Endogenous	1	4	61	16	15.5633	1	1	5520	FALSE	-0.0210942	5.61997	0.590398	5.53429	3.17413	0.00280494	0.175071	-1.65052	5.92837	5.25844
ATP6AP1	All Targets	RNA	Endogenous	1	6	93	18	23.1944	1	1	537	FALSE	-0.396242	6.15225	0.592967	6.09262	3.2302	0.00239938	0.165191	-1.53666	6.46563	5.83152
WIPI2	All Targets	RNA	Endogenous	1	6	39	21	17.7919	1	1	26100	FALSE	-0.452099	5.79647	0.595172	5.71611	3.2123	0.00252239	0.168514	-1.57717	6.05076	5.48186
PKM	All Targets	RNA	Endogenous	1	4	170	26	24.3431	1	1	5315	FALSE	0.541585	6.21934	0.599366	6.16494	3.25968	0.00220907	0.160674	-1.45345	6.52186	5.9151
CD27	All Targets	RNA	Endogenous	1	5	46	26	19.5416	1	1	939	FALSE	-0.115719	5.92278	0.600602	5.85046	3.26632	0.00216826	0.159365	-1.4422	6.21116	5.59797
GOLGA4	All Targets	RNA	Endogenous	1	6	70	19	20.7547	1	1	2803	FALSE	0.292969	6.00256	0.602333	5.93158	3.2306	0.00239673	0.165191	-1.53941	6.27607	5.69043
QRSL1	All Targets	RNA	Endogenous	1	4	46	15	15.0637	1	1	55278	FALSE	0.117131	5.58196	0.602395	5.4858	3.39379	0.00151034	0.136902	-1.12576	5.84833	5.23202
SHISA5	All Targets	RNA	Endogenous	1	6	96	19	23.0111	1	1	51246	FALSE	-0.0140639	6.14171	0.602421	6.08142	3.27537	0.00211377	0.157554	-1.41804	6.413	5.84932
EIF3A	All Targets	RNA	Endogenous	1	12	148	47	44.7907	1	1	8661	FALSE	-0.868609	7.05238	0.604551	7.02119	3.58037	0.000879945	0.102403	-0.670932	7.35499	6.78752
MYL9	All Targets	RNA	Endogenous	1	8	94	22	23.3224	1	1	10398	FALSE	-0.270254	6.15859	0.604606	6.09936	3.23344	0.00237771	0.164959	-1.52273	6.45336	5.85155
DYNC1H1	All Targets	RNA	Endogenous	1	6	124	69	47.9492	1	1	1778	FALSE	-0.175303	7.15045	0.606316	7.12224	3.3001	0.00197135	0.154606	-1.3531	7.47194	6.87744
RNF181	All Targets	RNA	Endogenous	1	6	349	20	33.4678	1	1	51255	FALSE	0.701523	6.65938	0.610241	6.61534	3.46397	0.00123445	0.122236	-0.945545	6.95254	6.3793
RPL27	All Targets	RNA	Endogenous	1	28	638	116	126.043	1	1	6155	FALSE	0.490599	8.5121	0.610559	8.5009	3.21889	0.00247645	0.16606	-1.54743	8.8596	8.24981
STX4	All Targets	RNA	Endogenous	1	7	89	24	26.3145	1	1	6810	FALSE	0.0282627	6.32124	0.613587	6.26685	3.58091	0.000878551	0.102403	-0.659044	6.63941	6.00605
GBP5	All Targets	RNA	Endogenous	1	6	43	24	20.5741	1	1	115362	FALSE	-0.272133	5.99092	0.613816	5.91855	3.743	0.000544116	0.0811138	-0.236501	6.26632	5.67511
IL24	All Targets	RNA	Endogenous	1	16	249	43	52.518	1	1	11009	FALSE	-0.669141	7.27586	0.618347	7.24841	3.63729	0.000744431	0.0938306	-0.516508	7.58756	7.011
CCN3	All Targets	RNA	Endogenous	1	10	49	28	26.2882	1	1	4856	FALSE	0.273923	6.32082	0.619313	6.26276	3.36936	0.00165108	0.145991	-1.23473	6.62094	6.01204
DYNC1LI2	All Targets	RNA	Endogenous	1	11	169	36	36.5019	1	1	1783	FALSE	-0.17214	6.77022	0.620385	6.73213	3.78165	0.000484757	0.0780719	-0.136129	7.07394	6.49287
AMELX	All Targets	RNA	Endogenous	1	6	36	20	20.1812	1	1	265	FALSE	-0.127225	5.96465	0.620496	5.89056	3.74853	0.000535216	0.0807751	-0.223587	6.25258	5.63714
RUVBL2	All Targets	RNA	Endogenous	1	16	176	43	44.2563	1	1	10856	FALSE	-0.303885	7.03626	0.621662	7.00346	3.64262	0.000732822	0.0937492	-0.508416	7.3349	6.77144
PIEZO1	All Targets	RNA	Endogenous	1	6	71	21	19.6885	1	1	9780	FALSE	0.204871	5.9295	0.626641	5.85894	3.52115	0.00104596	0.114088	-0.807019	6.22107	5.60546
MAK	All Targets	RNA	Endogenous	1	5	47	20	15.9077	1	1	4117	FALSE	-0.600881	5.65053	0.629832	5.56443	3.25681	0.00222696	0.161325	-1.45668	5.97266	5.27868
PITX1	All Targets	RNA	Endogenous	1	5	111	34	32.905	1	1	5307	FALSE	0.62222	6.63862	0.631699	6.58577	3.34864	0.00171794	0.148592	-1.24442	6.96778	6.31835
SRSF9	All Targets	RNA	Endogenous	1	7	114	36	32.2839	1	1	8683	FALSE	-1.46253	6.59997	0.632333	6.55809	3.69893	0.000620337	0.0874191	-0.349175	6.90905	6.31242
AEBP1	All Targets	RNA	Endogenous	1	7	66	29	23.2041	1	1	165	FALSE	0.191251	6.15108	0.635524	6.09025	3.46379	0.00123509	0.122236	-0.960057	6.47469	5.82115
CXXC5	All Targets	RNA	Endogenous	1	11	118	27	28.4043	1	1	51523	FALSE	-0.403005	6.42459	0.636477	6.37406	3.90241	0.000336923	0.0682855	0.1866	6.75252	6.10914
PYCR2	All Targets	RNA	Endogenous	1	3	76	14	16.1863	1	1	29920	FALSE	0.421398	5.67823	0.636859	5.59423	3.27632	0.00210811	0.157554	-1.40369	5.94616	5.34788
PSMG3	All Targets	RNA	Endogenous	1	12	243	38	54.2544	1	1	84262	FALSE	-0.92319	7.32512	0.639104	7.29601	3.51984	0.00104993	0.114088	-0.811911	7.66802	7.0356
TTC33	All Targets	RNA	Endogenous	1	20	258	49	61.1764	1	1	23548	FALSE	-0.437433	7.49028	0.640155	7.46535	3.61769	0.000788657	0.0948386	-0.564432	7.84243	7.20139
CNIH3	All Targets	RNA	Endogenous	1	5	46	16	15.9441	1	1	149111	FALSE	0.207207	5.65086	0.64091	5.56644	3.30677	0.00193454	0.154606	-1.33089	5.9104	5.32567
TTC1	All Targets	RNA	Endogenous	1	5	47	25	24.1649	1	1	7265	FALSE	0.00276339	6.21023	0.643463	6.1458	3.4708	0.00121032	0.122236	-0.94008	6.53208	5.87541
RPS9	All Targets	RNA	Endogenous	1	10	474	52	56.2255	1	1	6203	FALSE	0.504167	7.37337	0.644792	7.3481	3.45554	0.00127708	0.124519	-0.996195	7.73791	7.07523
VN1R4	All Targets	RNA	Endogenous	1	4	41	16	15.9063	1	1	317703	FALSE	-0.361509	5.64935	0.647865	5.56032	3.703	0.000612894	0.0874191	-0.335921	5.96308	5.2784
TOR1AIP2	All Targets	RNA	Endogenous	1	4	59	24	22.217	1	1	163590	FALSE	0.0707812	6.09713	0.64872	6.03422	3.31775	0.00189134	0.152986	-1.32909	6.45388	5.74045
APOO	All Targets	RNA	Endogenous	1	4	59	24	21.0447	1	1	79135	FALSE	0.0542888	6.02047	0.649133	5.95456	3.69232	0.000632624	0.0877163	-0.368373	6.35592	5.67362
SPON2	All Targets	RNA	Endogenous	1	5	63	26	22.6636	1	1	10417	FALSE	0.57217	6.12033	0.655023	6.05669	3.28586	0.00211136	0.157554	-1.42462	6.44446	5.78525
ARHGEF15	All Targets	RNA	Endogenous	1	3	46	21	20.4051	1	1	22899	FALSE	-0.312826	5.98887	0.659562	5.91272	3.48528	0.00116066	0.120322	-0.895775	6.28869	5.64955
PRRC2A	All Targets	RNA	Endogenous	1	10	74	36	31.0581	1	1	7916	FALSE	0.274588	6.54706	0.659594	6.50076	3.79209	0.000469831	0.0777505	-0.11113	6.8706	6.24188
HLA-A	All Targets	RNA	Endogenous	1	18	529	69	74.2029	1	1	3105	FALSE	0.166009	7.76191	0.660169	7.74283	3.54411	0.00097832	0.109005	-0.751239	8.11886	7.47961
PRDX1	All Targets	RNA	Endogenous	1	6	68	21	21.3099	1	1	5052	FALSE	-0.0854223	6.03666	0.660257	5.97127	3.732	0.000562242	0.0831288	-0.264372	6.36615	5.69485
VAMP8	All Targets	RNA	Endogenous	1	5	83	25	22.0221	1	1	8673	FALSE	-0.080586	6.08305	0.661026	6.01927	3.52475	0.00103507	0.113845	-0.792737	6.41739	5.74058
SELENON	All Targets	RNA	Endogenous	1	4	97	21	21.1993	1	1	57190	FALSE	0.449422	6.03105	0.661721	5.96643	3.69953	0.000619241	0.0874191	-0.342567	6.36112	5.69014
ADARB1	All Targets	RNA	Endogenous	1	5	183	36	42.5913	1	1	104	FALSE	0.025812	6.99071	0.66366	6.95415	3.90381	0.0003355	0.0682855	0.192884	7.3388	6.68489
PDLIM3	All Targets	RNA	Endogenous	1	2	69	17	18.4963	1	1	27295	FALSE	0.0914291	5.85153	0.664064	5.78025	3.55618	0.000944447	0.108509	-0.714272	6.15246	5.5197
NR4A2	All Targets	RNA	Endogenous	1	8	149	33	33.9038	1	1	4929	FALSE	0.89983	6.67246	0.664556	6.62546	3.39871	0.00159893	0.14278	-1.18653	6.99764	6.36494
MAPKAPK2	All Targets	RNA	Endogenous	1	7	79	23	23.0436	1	1	9261	FALSE	-0.304296	6.14144	0.665937	6.08049	3.90485	0.000334445	0.0682855	0.197328	6.47803	5.80222
SLC35F3	All Targets	RNA	Endogenous	1	4	32	22	16.4232	1	1	148641	FALSE	-0.426004	5.69407	0.666026	5.60633	3.19649	0.00265942	0.173306	-1.61015	5.95131	5.36484
SPP1	All Targets	RNA	Endogenous	1	2	149	16	18.0412	1	1	6696	FALSE	0.559632	5.8278	0.666498	5.75785	3.27089	0.00214057	0.158244	-1.40994	6.14927	5.48385
HSD11B1L	All Targets	RNA	Endogenous	1	2	39	12	10.699	1	1	374875	FALSE	-0.202607	5.14452	0.668914	5.02539	3.11959	0.00326102	0.186664	-1.76525	5.40956	4.75648
YME1L1	All Targets	RNA	Endogenous	1	10	104	25	28.8055	1	1	10730	FALSE	0.0899	6.4462	0.669885	6.39421	3.99795	0.000251906	0.0607368	0.447794	6.76109	6.13739
TBCA	All Targets	RNA	Endogenous	1	9	84	21	24.8154	1	1	6902	FALSE	-0.116073	6.24164	0.670686	6.18448	4.10511	0.00018126	0.0490884	0.743945	6.56872	5.91552
NFYA	All Targets	RNA	Endogenous	1	16	1029	108	141.613	1	1	4800	FALSE	-0.186196	8.68265	0.672281	8.67093	3.82034	0.000431638	0.0734517	-0.0264129	9.04611	8.4083
ADAM9	All Targets	RNA	Endogenous	1	1	73	18	16.7084	1	1	8754	FALSE	0.438101	5.73913	0.682951	5.6561	3.40293	0.00147132	0.134719	-1.0982	6.11748	5.33314
IGFBP3	All Targets	RNA	Endogenous	1	2	80	20	20.0394	1	1	3486	FALSE	0.639476	5.96369	0.685325	5.89647	3.12181	0.00355413	0.193101	-1.85094	6.30609	5.60974
ITPRIPL2	All Targets	RNA	Endogenous	1	6	84	20	20.1861	1	1	162073	FALSE	0.0237534	5.96529	0.686404	5.89601	4.08769	0.000191264	0.0507357	0.693975	6.2955	5.61637
BBS1	All Targets	RNA	Endogenous	1	5	40	24	18.821	1	1	582	FALSE	0.105686	5.87284	0.686779	5.79502	3.83027	0.000418939	0.0734517	-0.000307034	6.20331	5.50922
POLR2J	All Targets	RNA	Endogenous	1	6	64	27	22.0327	1	1	5439	FALSE	-0.29864	6.08241	0.687414	6.01751	3.94534	0.000295751	0.0666845	0.30789	6.42904	5.72943
RPL30	All Targets	RNA	Endogenous	1	15	528	59	63.9009	1	1	6156	FALSE	0.441858	7.55214	0.687877	7.52981	3.78882	0.000474464	0.0778034	-0.114712	7.9281	7.251
GLRX5	All Targets	RNA	Endogenous	1	1	42	15	11.7648	1	1	51218	FALSE	0.0992238	5.28408	0.688029	5.17091	3.36994	0.00161685	0.143669	-1.17431	5.56955	4.89187
RCAN1	All Targets	RNA	Endogenous	1	9	390	35	42.0352	1	1	1827	FALSE	0.0901335	6.96965	0.688874	6.93336	3.6145	0.000804965	0.0961586	-0.581707	7.35323	6.63946
TRPC5	All Targets	RNA	Endogenous	1	5	35	16	14.1935	1	1	7224	FALSE	-0.946908	5.5012	0.690293	5.40117	3.82304	0.000428146	0.0734517	-0.018814	5.82423	5.10502
MRPL24	All Targets	RNA	Endogenous	1	8	70	22	22.2185	1	1	79590	FALSE	-0.000792738	6.09331	0.694477	6.02892	4.21233	0.000130022	0.0404368	1.04016	6.44175	5.73994
ADAMTS3	All Targets	RNA	Endogenous	1	4	44	21	16.7436	1	1	9508	FALSE	0.333371	5.72506	0.699631	5.63474	3.44491	0.00130419	0.126478	-0.993873	6.09496	5.31259
RPL37	All Targets	RNA	Endogenous	1	24	591	94	107.371	1	1	6167	FALSE	0.547753	8.2845	0.703888	8.27088	3.86873	0.000373073	0.0705916	0.102286	8.6941	7.97463
TMEM106C	All Targets	RNA	Endogenous	1	27	4597	156	248.991	1	1	79022	FALSE	-0.653558	9.49127	0.705631	9.48272	3.69281	0.000631711	0.0877163	-0.359587	9.87132	9.2107
ITGAV	All Targets	RNA	Endogenous	1	13	170	43	44.8215	1	1	3685	FALSE	0.0228861	7.05505	0.705837	7.02268	3.85559	0.000389165	0.0716302	0.0586589	7.40557	6.75466
RPS29	All Targets	RNA	Endogenous	1	21	698	82	104.979	1	1	6235	FALSE	0.569296	8.25276	0.70621	8.23906	3.57062	0.000905426	0.104693	-0.67575	8.65362	7.94887
CCDC47	All Targets	RNA	Endogenous	1	10	440	59	68.3473	1	1	57003	FALSE	-0.267562	7.6507	0.706882	7.62785	3.28736	0.00230629	0.163783	-1.47945	7.98732	7.37623
TRIM17	All Targets	RNA	Endogenous	1	4	76	23	18.8187	1	1	51127	FALSE	0.338922	5.87949	0.709772	5.80406	3.51535	0.00106375	0.114213	-0.816325	6.23327	5.50362
ITGB1	All Targets	RNA	Endogenous	1	11	269	39	44.1501	1	1	3688	FALSE	-0.4673	7.03483	0.710994	7.00305	4.03591	0.000224264	0.0561843	0.553665	7.40039	6.72491
SSB	All Targets	RNA	Endogenous	1	4	49	23	19.1567	1	1	6741	FALSE	-0.0703664	5.90117	0.717214	5.8273	4.00952	0.00024315	0.0600813	0.4804	6.26785	5.51892
HPF1	All Targets	RNA	Endogenous	1	3	36	16	15.2938	1	1	54969	FALSE	0.53829	5.60271	0.71909	5.50889	3.8672	0.000374802	0.0705916	0.0985808	5.96974	5.1863
MALRD1	All Targets	RNA	Endogenous	1	5	93	31	27.7073	1	1	340895	FALSE	-0.921727	6.39615	0.720418	6.34378	4.21747	0.000127958	0.0404368	1.05438	6.75963	6.05269
KIRREL3	All Targets	RNA	Endogenous	1	5	41	20	16.0772	1	1	84623	FALSE	0.0439561	5.66435	0.720722	5.57326	3.81609	0.000437183	0.073462	-0.0375706	5.95294	5.30749
ARHGEF25	All Targets	RNA	Endogenous	1	6	43	26	20.6525	1	1	115557	FALSE	0.562836	5.99671	0.725775	5.92419	3.88002	0.000360556	0.0705916	0.132401	6.33673	5.63541
SMIM40	All Targets	RNA	Endogenous	1	4	76	27	18.5045	1	1	113523636	FALSE	-0.0927156	5.85477	0.730589	5.77895	3.82558	0.000424884	0.0734517	-0.0125656	6.19002	5.4912
S100A11	All Targets	RNA	Endogenous	1	11	405	53	50.9844	1	1	6282	FALSE	0.561431	7.23476	0.739723	7.20715	4.13594	0.000164793	0.0460115	0.829161	7.65149	6.89611
ACSF2	All Targets	RNA	Endogenous	1	8	461	36	46.9441	1	1	80221	FALSE	-0.490661	7.12769	0.747441	7.09425	3.91826	0.000321118	0.0682855	0.235127	7.49449	6.81408
KRTAP20-3	All Targets	RNA	Endogenous	1	3	55	18	15.6069	1	1	337985	FALSE	0.567886	5.63353	0.753207	5.54025	3.63521	0.000762439	0.0938306	-0.522762	6.04226	5.18884
MPC2	All Targets	RNA	Endogenous	1	5	84	27	21.8802	1	1	25874	FALSE	0.0282047	6.0724	0.754547	6.01056	4.59651	3.87178e-05	0.0211634	2.11559	6.46451	5.69279
BIRC5	All Targets	RNA	Endogenous	1	9	93	32	32.4271	1	1	332	FALSE	-0.529222	6.60629	0.758737	6.56253	4.66161	3.14423e-05	0.0195571	2.31279	6.99886	6.2571
ZSWIM9	All Targets	RNA	Endogenous	1	5	43	23	20.1614	1	1	374920	FALSE	-0.40474	5.96532	0.758941	5.89042	3.92266	0.000316856	0.0682855	0.246924	6.3189	5.59048
HLA-C	All Targets	RNA	Endogenous	1	7	162	35	32.7382	1	1	3107	FALSE	0.449152	6.62087	0.759648	6.57848	4.18839	0.00014007	0.0426507	0.974483	7.02171	6.26821
TIMP3	All Targets	RNA	Endogenous	1	8	516	32	48.5612	1	1	7078	FALSE	0.606678	7.17331	0.766609	7.14329	3.71742	0.000660766	0.0882881	-0.388086	7.57833	6.83876
MYLK4	All Targets	RNA	Endogenous	1	5	74	18	18.5639	1	1	340156	FALSE	0.138865	5.85712	0.767086	5.77986	3.87548	0.000365532	0.0705916	0.120514	6.23216	5.46325
CYSTM1	All Targets	RNA	Endogenous	1	5	70	17	15.2739	1	1	84418	FALSE	0.514817	5.59818	0.768545	5.50788	4.21784	0.000127812	0.0404368	1.03733	5.95338	5.19602
LPAR2	All Targets	RNA	Endogenous	1	5	76	30	24.5211	1	1	9170	FALSE	-0.129696	6.23188	0.769131	6.17028	3.76621	0.000517853	0.0807378	-0.183705	6.59685	5.87168
RAD23B	All Targets	RNA	Endogenous	1	9	360	40	58.4325	1	1	5887	FALSE	-0.898527	7.43429	0.771199	7.40577	4.46665	5.85065e-05	0.0256038	1.74491	7.84122	7.10097
CTTN	All Targets	RNA	Endogenous	1	7	101	36	31.5685	1	1	2017	FALSE	0.108693	6.57241	0.775732	6.52514	4.49486	5.35022e-05	0.0251072	1.83489	6.97164	6.2126
CRLF1	All Targets	RNA	Endogenous	1	10	67	26	28.2021	1	1	9244	FALSE	0.831672	6.41944	0.77953	6.36258	4.00085	0.000304132	0.0677277	0.30259	6.82544	6.03858
H2AC1	All Targets	RNA	Endogenous	1	6	59	22	19.6533	1	1	221613	FALSE	0.419728	5.93496	0.781063	5.85821	3.28471	0.00266137	0.173306	-1.56866	6.26802	5.57135
LYZ	All Targets	RNA	Endogenous	1	9	121	21	25.0529	1	1	4069	FALSE	0.553046	6.25576	0.788243	6.19603	4.49029	5.42843e-05	0.0251072	1.82996	6.66002	5.87124
ACTR3	All Targets	RNA	Endogenous	1	9	141	27	28.5234	1	1	10096	FALSE	-0.674765	6.43071	0.788554	6.38192	4.93641	1.29644e-05	0.012308	3.11136	6.8547	6.05097
ETV3	All Targets	RNA	Endogenous	1	10	96	37	34.0229	1	1	2117	FALSE	-0.331381	6.67521	0.791575	6.63035	4.11159	0.000182333	0.0490884	0.741868	7.05149	6.33555
TEX13C	All Targets	RNA	Endogenous	1	4	35	17	15.5218	1	1	100129520	FALSE	0.248679	5.61891	0.795913	5.52689	4.40034	7.21458e-05	0.0293857	1.55591	5.98405	5.20688
SERPINA1	All Targets	RNA	Endogenous	1	5	90	29	24.4355	1	1	5265	FALSE	-0.0552715	6.22792	0.803158	6.16771	4.31137	9.54312e-05	0.0364596	1.30538	6.6308	5.84355
CST1	All Targets	RNA	Endogenous	1	6	42	22	20.0485	1	1	1469	FALSE	-0.168508	5.95665	0.805436	5.88332	3.99368	0.000278521	0.0635943	0.372314	6.33216	5.56913
RPS24	All Targets	RNA	Endogenous	1	9	399	37	41.2544	1	1	6229	FALSE	0.587048	6.94559	0.814291	6.90858	3.36601	0.00247408	0.16606	-1.49406	7.3731	6.58342
SDK2	All Targets	RNA	Endogenous	1	4	63	28	21.1282	1	1	54549	FALSE	-0.0135398	6.03228	0.814337	5.9617	4.25379	0.000114262	0.0397789	1.15495	6.43193	5.63255
CTSB	All Targets	RNA	Endogenous	1	4	358	45	39.8868	1	1	1508	FALSE	0.248764	6.89598	0.815248	6.86241	4.39526	7.33094e-05	0.0293857	1.54038	7.35961	6.51438
ARMCX3	All Targets	RNA	Endogenous	1	3	65	30	23.7705	1	1	51566	FALSE	-0.196138	6.18935	0.823206	6.12926	4.53703	4.67947e-05	0.0228281	1.95516	6.66555	5.75385
RPS18	All Targets	RNA	Endogenous	1	11	981	98	95.8691	1	1	6222	FALSE	0.721435	8.12688	0.825801	8.1112	3.37455	0.00224899	0.162206	-1.4097	8.58638	7.77858
RHOA	All Targets	RNA	Endogenous	1	9	251	33	40.9562	1	1	387	FALSE	0.212806	6.93264	0.839577	6.89693	3.69841	0.000978974	0.109005	-0.688459	7.37044	6.56547
MYL6B	All Targets	RNA	Endogenous	1	8	82	33	29.4532	1	1	140465	FALSE	-0.0316536	6.47728	0.845057	6.426	4.70113	2.77009e-05	0.0193725	2.42893	6.90049	6.09386
TUSC2	All Targets	RNA	Endogenous	1	3	104	34	27.4384	1	1	11334	FALSE	0.0157566	6.38933	0.848741	6.33677	4.63438	3.43056e-05	0.0199614	2.21407	6.84999	5.97752
CLN6	All Targets	RNA	Endogenous	1	2	36	14	14.0487	1	1	54982	FALSE	0.576172	5.49643	0.850374	5.39412	4.40433	7.12439e-05	0.0293857	1.56616	5.95001	5.00499
TBL2	All Targets	RNA	Endogenous	1	5	50	14	16.0687	1	1	26608	FALSE	0.0345743	5.66537	0.85085	5.57217	4.53682	4.68256e-05	0.0228281	1.94675	6.0796	5.21698
PDLIM7	All Targets	RNA	Endogenous	1	3	77	19	17.9315	1	1	9260	FALSE	0.209228	5.81123	0.857124	5.73504	4.67018	3.0591e-05	0.0195571	2.3143	6.25371	5.37197
TGFBI	All Targets	RNA	Endogenous	1	5	128	26	23.1891	1	1	7045	FALSE	0.756659	6.15469	0.857328	6.09396	4.60455	3.77366e-05	0.0211634	2.13075	6.61912	5.72634
RPRD1B	All Targets	RNA	Endogenous	1	11	308	65	56.89	1	1	58490	FALSE	-0.0650646	7.39035	0.862575	7.3635	3.33712	0.00304025	0.18099	-1.64705	7.80885	7.05175
LENG1	All Targets	RNA	Endogenous	1	11	218	39	43.9449	1	1	79165	FALSE	-0.71682	7.03068	0.863728	6.99583	4.64526	3.31321e-05	0.0199212	2.25733	7.4744	6.66084
RPAIN	All Targets	RNA	Endogenous	1	8	47	28	22.1643	1	1	84268	FALSE	0.454766	6.09868	0.866048	6.02396	3.52894	0.0018185	0.151161	-1.20843	6.52903	5.67041
MAGEA8	All Targets	RNA	Endogenous	1	6	36	17	16.1641	1	1	4107	FALSE	-1.0639	5.67706	0.867828	5.5809	4.71864	2.61871e-05	0.0193725	2.47122	6.06161	5.2444
CDKN2D	All Targets	RNA	Endogenous	1	7	73	32	27.2142	1	1	1032	FALSE	0.0205366	6.37165	0.869262	6.3128	4.68687	2.89975e-05	0.0193725	2.38437	6.81196	5.96339
CCDC110	All Targets	RNA	Endogenous	1	4	48	14	13.8281	1	1	256309	FALSE	-0.518474	5.47319	0.884148	5.37015	4.56506	4.2801e-05	0.0220584	1.99596	5.94055	4.97086
TACSTD2	All Targets	RNA	Endogenous	1	5	48	16	14.0991	1	1	4070	FALSE	-0.113717	5.495	0.884954	5.39405	4.25021	0.000115545	0.0397789	1.12903	5.86043	5.06759
INHBA	All Targets	RNA	Endogenous	1	4	47	25	18.9581	1	1	3624	FALSE	-0.291785	5.88428	0.887323	5.80882	4.9888	1.0936e-05	0.0118741	3.23784	6.3282	5.44526
EIF4G2	All Targets	RNA	Endogenous	1	16	253	44	50.4332	1	1	1982	FALSE	0.618376	7.21954	0.894244	7.18991	5.05591	8.79023e-06	0.0105705	3.46721	7.70291	6.83081
PRELID3B	All Targets	RNA	Endogenous	1	31	597	107	116.752	1	1	51012	FALSE	-0.884626	8.40432	0.908602	8.39098	4.58689	3.99235e-05	0.0211806	2.06933	8.90526	8.03098
DCBLD2	All Targets	RNA	Endogenous	1	9	119	22	24.5111	1	1	131566	FALSE	-0.28638	6.22831	0.919496	6.16633	5.11706	7.20048e-06	0.0092773	3.64863	6.72773	5.77335
ATP5MC2	All Targets	RNA	Endogenous	1	10	6263	48	115.982	1	1	517	FALSE	0.376776	8.41402	0.92581	8.39186	4.83959	1.77363e-05	0.0152346	2.79517	8.94485	8.00476
KRTAP22-1	All Targets	RNA	Endogenous	1	5	27	11	10.2362	1	1	337979	FALSE	1.07935	5.09674	0.937816	4.94775	4.00068	0.000270038	0.0624481	0.378569	5.46341	4.5868
THBS2	All Targets	RNA	Endogenous	1	5	224	24	22.4031	1	1	7058	FALSE	0.71607	6.10988	0.946078	6.04593	4.69656	2.88037e-05	0.0193725	2.3733	6.6576	5.61776
TAGLN2	All Targets	RNA	Endogenous	1	9	249	33	41.442	1	1	8407	FALSE	0.422459	6.95015	0.956466	6.9136	4.91854	1.62722e-05	0.0146759	2.92574	7.43773	6.54671
KRT8	All Targets	RNA	Endogenous	1	5	76	22	23.189	1	1	3856	FALSE	0.625389	6.15361	0.958093	6.08813	5.61884	1.38292e-06	0.00256924	5.15624	6.66564	5.68387
SQSTM1	All Targets	RNA	Endogenous	1	13	209	43	43.9634	1	1	8878	FALSE	0.0242766	7.02764	0.959133	6.99436	5.89126	5.60983e-07	0.00144557	5.94698	7.56271	6.59651
RAB39A	All Targets	RNA	Endogenous	1	6	99	26	26.8104	1	1	54734	FALSE	-0.406432	6.35246	0.982493	6.29784	5.60992	1.42435e-06	0.00256924	5.07936	6.881	5.88963
MYBPC2	All Targets	RNA	Endogenous	1	4	75	23	17.7171	1	1	4606	FALSE	0.0627306	5.81593	0.98558	5.72163	5.14852	6.4971e-06	0.00901498	3.66882	6.3381	5.2901
SCRN3	All Targets	RNA	Endogenous	1	4	49	21	16.5306	1	1	79634	FALSE	0.322299	5.71253	0.999317	5.6214	4.97569	1.14122e-05	0.0118741	3.1807	6.24608	5.18413
POSTN	All Targets	RNA	Endogenous	1	3	119	23	21.0857	1	1	10631	FALSE	0.917268	6.02925	1.02939	5.96192	4.35037	0.000149741	0.0435648	0.965653	6.55078	5.54971
TMSB10	All Targets	RNA	Endogenous	1	79	1235	272	243.54	1	1	9168	FALSE	0.55999	9.45505	1.05874	9.44717	4.32649	0.00011688	0.0397789	1.11675	10.06	9.0182
H4C1	All Targets	RNA	Endogenous	1	7	110	32	32.4903	1	1	8359	FALSE	-0.178316	6.61468	1.08127	6.56706	5.78543	7.96745e-07	0.00179646	5.56634	7.20461	6.12078
MMP14	All Targets	RNA	Endogenous	1	8	108	33	26.3294	1	1	4323	FALSE	1.06911	6.32773	1.08213	6.2689	3.89815	0.00101585	0.112417	-0.630526	6.90688	5.82232
NES	All Targets	RNA	Endogenous	1	5	296	27	25.743	1	1	10763	FALSE	1.23157	6.3003	1.12005	6.24184	5.26772	6.09416e-06	0.00901498	3.77372	6.97428	5.72913
GAP43	All Targets	RNA	Endogenous	1	7	424	26	28.6551	1	1	2596	FALSE	1.60815	6.45057	1.12884	6.39116	4.78962	5.63691e-05	0.0254197	1.87049	7.09394	5.8992
TIMP1	All Targets	RNA	Endogenous	1	11	904	44	52.0066	1	1	7076	FALSE	0.68526	7.2715	1.22354	7.23649	5.14854	2.05209e-05	0.0168252	2.75583	7.98701	6.71112
ATF3	All Targets	RNA	Endogenous	1	7	93	29	28.253	1	1	467	FALSE	-0.175456	6.42687	1.23387	6.36912	6.20382	2.12433e-07	0.000776384	6.74436	7.11271	5.8486
STBD1	All Targets	RNA	Endogenous	1	8	280	38	42.0201	1	1	8987	FALSE	-0.590174	6.97497	1.24254	6.93458	6.12408	2.76241e-07	0.000830474	6.48605	7.66829	6.42098
KDM7A	All Targets	RNA	Endogenous	1	7	52	19	19.7663	1	1	80853	FALSE	-0.260481	5.94654	1.25034	5.86387	7.21775	6.93474e-09	0.000125089	9.77722	6.63326	5.32529
HNRNPCL3	All Targets	RNA	Endogenous	1	10	133	40	39.0629	1	1	649330	FALSE	-0.775215	6.86987	1.27759	6.82801	6.70885	3.71984e-08	0.000335492	8.31251	7.55922	6.31617
CREB3	All Targets	RNA	Endogenous	1	7	90	23	24.7985	1	1	10488	FALSE	-0.230927	6.2538	1.3087	6.18251	6.5873	6.75043e-08	0.000405881	7.78823	6.97918	5.62484
CLDN11	All Targets	RNA	Endogenous	1	3	81	24	20.2841	1	1	5010	FALSE	0.438138	5.9829	1.32456	5.90841	6.2774	2.15208e-07	0.000776384	6.70456	6.69747	5.35607
CD163	All Targets	RNA	Endogenous	1	2	128	27	21.4566	1	1	9332	FALSE	0.412488	6.06086	-0.7005	6.00439	-3.07297	0.0037594	0.200035	-1.88789	5.59886	6.28825
FERD3L	All Targets	RNA	Endogenous	1	1	53	27	18.7547	1	1	222894	FALSE	-0.0519793	5.87978	-0.603116	5.81823	-3.06436	0.00379353	0.201258	-1.91066	5.44453	6.07983
YWHAQ	All Targets	RNA	Endogenous	1	9	223	29	33.7815	1	1	10971	FALSE	0.518353	6.66452	0.507485	6.62383	3.0621	0.00381702	0.20191	-1.94694	6.91561	6.41958
ABHD16B	All Targets	RNA	Endogenous	1	2	47	19	14.1641	1	1	140701	FALSE	-0.130028	5.50716	-0.683016	5.41843	-3.05723	0.003868	0.204009	-1.90325	4.99621	5.71399
FEZ2	All Targets	RNA	Endogenous	1	5	53	17	16.7289	1	1	9637	FALSE	-0.173427	5.71489	0.57713	5.63109	3.05289	0.00391395	0.20583	-1.9533	5.97842	5.38797
RPS19	All Targets	RNA	Endogenous	1	30	629	81	97.1894	1	1	6223	FALSE	0.551333	8.14291	0.620879	8.12765	3.05135	0.00395607	0.207441	-1.95928	8.49836	7.86815
NCLN	All Targets	RNA	Endogenous	1	1	43	21	13.7631	1	1	56926	FALSE	0.501095	5.47655	-0.647615	5.39164	-3.04629	0.00398491	0.207692	-1.94213	4.97475	5.68347
GCC1	All Targets	RNA	Endogenous	1	2	52	24	17.3351	1	1	79571	FALSE	-0.357378	5.76342	-0.578387	5.69354	-3.04559	0.00399251	0.207692	-1.9444	5.35608	5.92976
GNA11	All Targets	RNA	Endogenous	1	7	96	18	21.9351	1	1	2767	FALSE	-0.142357	6.07895	0.628523	6.01412	3.04812	0.00399541	0.207692	-1.96415	6.39386	5.7483
SEC61A1	All Targets	RNA	Endogenous	1	8	85	29	23.7267	1	1	29927	FALSE	-0.478863	6.17998	0.522664	6.1208	3.04372	0.0040128	0.207997	-1.99809	6.43806	5.89871
NR1H2	All Targets	RNA	Endogenous	1	5	107	35	27.235	1	1	7376	FALSE	0.0852648	6.37137	0.599589	6.32153	3.04123	0.0040401	0.20847	-1.97321	6.66686	6.07979
SMCO3	All Targets	RNA	Endogenous	1	1	51	23	16.375	1	1	440087	FALSE	0.511961	5.70141	-0.580307	5.62958	-3.03876	0.00406727	0.20847	-1.96525	5.27626	5.87691
BARHL1	All Targets	RNA	Endogenous	1	1	40	13	12.0691	1	1	56751	FALSE	0.33954	5.30406	-0.603216	5.21114	-3.03868	0.00406808	0.20847	-1.95749	4.8492	5.4645
PDIA3	All Targets	RNA	Endogenous	1	7	107	27	25.8182	1	1	2923	FALSE	-0.829253	6.29389	0.514976	6.24267	3.03857	0.00406932	0.20847	-1.99519	6.55023	6.02739
ZNF764	All Targets	RNA	Endogenous	1	7	127	41	38.1463	1	1	92595	FALSE	0.295399	6.83463	-0.542586	6.79362	-3.0366	0.00409121	0.20847	-2.01176	6.48328	7.01085
NCBP2	All Targets	RNA	Endogenous	1	9	99	33	30.3263	1	1	22916	FALSE	-1.50612	6.51311	0.460236	6.46682	3.03659	0.00409127	0.20847	-2.02636	6.73984	6.2757
RIOK3	All Targets	RNA	Endogenous	1	4	60	21	19.893	1	1	8780	FALSE	0.17682	5.94441	0.508767	5.875	3.03542	0.00410427	0.208543	-2.01449	6.19578	5.65045
TMEM41B	All Targets	RNA	Endogenous	1	19	120	40	44.9261	1	1	440026	FALSE	-0.727709	7.05584	0.478829	7.02363	3.03414	0.0041186	0.208684	-2.03729	7.30061	6.82975
SERPINA6	All Targets	RNA	Endogenous	1	2	40	12	11.8951	1	1	866	FALSE	-0.46144	5.28831	-0.778857	5.17089	-3.05562	0.00414275	0.209319	-1.94806	4.74797	5.46694
MMP28	All Targets	RNA	Endogenous	1	2	47	22	16.012	1	1	79148	FALSE	-0.308776	5.66095	-0.549405	5.58245	-3.02847	0.00418243	0.210734	-1.98758	5.25299	5.81307
PRDM5	All Targets	RNA	Endogenous	1	4	54	25	23.5883	1	1	11107	FALSE	-0.38195	6.17662	0.579949	6.11474	3.02629	0.00420716	0.211389	-2.02244	6.46268	5.87119
BCL2L11	All Targets	RNA	Endogenous	1	1	51	21	15.0844	1	1	10018	FALSE	-0.345193	5.58992	-0.550744	5.51985	-3.02483	0.00422386	0.21158	-1.99497	5.19575	5.74673
GRAMD2B	All Targets	RNA	Endogenous	1	1	58	24	16.7357	1	1	65983	FALSE	-0.570801	5.72415	-0.590033	5.66136	-3.02391	0.00423442	0.21158	-1.9939	5.29681	5.91654
PPP4R2	All Targets	RNA	Endogenous	1	2	84	29	19.7125	1	1	151987	FALSE	-0.488649	5.93821	-0.585895	5.87969	-3.01714	0.00431272	0.212866	-1.99994	5.53487	6.12107
VPS37B	All Targets	RNA	Endogenous	1	5	52	19	17.9309	1	1	79720	FALSE	0.0984037	5.80616	0.541952	5.72859	3.01712	0.00431294	0.212866	-2.04546	6.07214	5.48811
VPS37D	All Targets	RNA	Endogenous	1	4	91	31	26.6088	1	1	155382	FALSE	0.254917	6.33797	-0.610647	6.29452	-3.0166	0.004319	0.212866	-2.01134	5.93961	6.54295
EFNA5	All Targets	RNA	Endogenous	1	1	33	18	12.8485	1	1	1946	FALSE	-0.138838	5.3857	-0.570602	5.28983	-3.01618	0.0043239	0.212866	-2.00933	4.96528	5.51701
CTDSPL	All Targets	RNA	Endogenous	1	1	44	17	14.1367	1	1	10217	FALSE	-0.658532	5.50139	-0.585826	5.42542	-3.01611	0.00432479	0.212866	-2.00561	5.07833	5.66839
ST3GAL1	All Targets	RNA	Endogenous	1	1	51	18	13.2689	1	1	6482	FALSE	1.19693	5.44549	-0.743271	5.36563	-3.0437	0.00436961	0.212866	-1.99957	4.89463	5.69533
LECT2	All Targets	RNA	Endogenous	1	1	42	20	14.1049	1	1	3950	FALSE	-0.128299	5.50514	-0.607682	5.4171	-3.01103	0.00438463	0.212866	-2.02309	5.04528	5.67738
CCDC184	All Targets	RNA	Endogenous	1	5	44	19	16.1031	1	1	387856	FALSE	0.104535	5.67196	0.569156	5.58028	3.01062	0.00438943	0.212866	-2.05395	5.93571	5.33147
ARPC2	All Targets	RNA	Endogenous	1	5	149	30	30.5445	1	1	10109	FALSE	-0.291598	6.52745	0.641572	6.48191	3.03408	0.0044113	0.212866	-2.05044	6.83951	6.23159
SOX4	All Targets	RNA	Endogenous	1	5	65	24	23.0854	1	1	6659	FALSE	0.106313	6.14286	0.561481	6.08325	3.00837	0.0044162	0.212866	-2.06867	6.40497	5.85805
AHNAK	All Targets	RNA	Endogenous	1	4	286	48	46.1158	1	1	79026	FALSE	-0.397504	7.09876	-0.615508	7.07414	-3.00687	0.00443414	0.212866	-2.04709	6.68764	7.3447
EIF3D	All Targets	RNA	Endogenous	1	5	68	20	20.2527	1	1	8664	FALSE	0.214728	5.96788	0.546177	5.90028	3.00603	0.00444417	0.212866	-2.06788	6.23519	5.66584
UPK1B	All Targets	RNA	Endogenous	1	2	38	18	13.9976	1	1	7348	FALSE	-0.464008	5.48495	-0.61729	5.39893	-3.00527	0.00445332	0.212866	-2.02737	4.98688	5.68736
TKT	All Targets	RNA	Endogenous	1	8	82	22	19.9099	1	1	7086	FALSE	-0.0974765	5.94335	0.501989	5.87463	3.00482	0.00445871	0.212866	-2.07048	6.18241	5.65918
FLRT3	All Targets	RNA	Endogenous	1	4	58	24	18.3578	1	1	23767	FALSE	0.679723	5.83881	0.583194	5.7681	3.00474	0.00445968	0.212866	-2.05355	6.10335	5.53343
OGFOD3	All Targets	RNA	Endogenous	1	7	52	19	19.2237	1	1	79701	FALSE	0.540063	5.89946	0.582521	5.82482	3.00465	0.00446076	0.212866	-2.07543	6.1753	5.57949
PRDX5	All Targets	RNA	Endogenous	1	6	63	17	20.3728	1	1	25824	FALSE	-0.439127	5.97508	0.556968	5.90816	3.00465	0.00446078	0.212866	-2.07081	6.24358	5.67337
TRIB1	All Targets	RNA	Endogenous	1	2	96	24	20.8745	1	1	10221	FALSE	-0.155419	6.0135	-0.59553	5.95335	-3.00251	0.00448667	0.213537	-2.06162	5.60957	6.19399
RNLS	All Targets	RNA	Endogenous	1	2	42	21	14.4317	1	1	55328	FALSE	-0.000946078	5.52875	-0.703352	5.44472	-3.004	0.00452906	0.214533	-2.04035	5.03046	5.73469
CAND2	All Targets	RNA	Endogenous	1	2	39	15	11.5163	1	1	23066	FALSE	0.206117	5.23516	-0.681219	5.13139	-2.99788	0.00454301	0.214533	-2.0387	4.74222	5.40381
NPY2R	All Targets	RNA	Endogenous	1	1	36	14	11.6848	1	1	4887	FALSE	-0.0065216	5.26196	-0.626654	5.15896	-2.99786	0.00454327	0.214533	-2.04137	4.78213	5.42274
ZC2HC1C	All Targets	RNA	Endogenous	1	1	45	17	14.3282	1	1	79696	FALSE	0.978438	5.52801	-0.647736	5.44737	-2.98954	0.00464637	0.21859	-2.07209	5.07827	5.70574
ZBTB16	All Targets	RNA	Endogenous	1	2	224	20	22.9166	1	1	7704	FALSE	1.13474	6.15032	-1.32177	6.09745	-3.36935	0.00465343	0.21859	-1.88485	5.4128	6.5767
GUCY1A2	All Targets	RNA	Endogenous	1	1	52	29	17.991	1	1	2977	FALSE	-0.0932931	5.82174	-0.574207	5.75938	-2.98704	0.0046777	0.2186	-2.08903	5.42136	5.996
BCL2L2	All Targets	RNA	Endogenous	1	13	160	55	50.24	1	1	599	FALSE	-0.421705	7.21151	0.481801	7.18405	2.98681	0.00468062	0.2186	-2.1378	7.45724	6.99281
MAPK8IP1	All Targets	RNA	Endogenous	1	2	44	23	15.8118	1	1	9479	FALSE	0.292729	5.64864	-0.612488	5.56619	-2.98583	0.00469294	0.2186	-2.07462	5.19346	5.8271
ATRAID	All Targets	RNA	Endogenous	1	7	56	21	20.5134	1	1	51374	FALSE	0.265963	5.9844	0.543594	5.91713	2.98511	0.00470212	0.2186	-2.1148	6.23228	5.69653
INPP5E	All Targets	RNA	Endogenous	1	4	38	16	15.5439	1	1	56623	FALSE	0.310955	5.61966	0.558776	5.53066	2.98311	0.00472742	0.219211	-2.10399	5.84223	5.31256
CFL1	All Targets	RNA	Endogenous	1	7	356	37	37.375	1	1	1072	FALSE	0.456191	6.81121	0.613373	6.77146	2.99337	0.00477531	0.220652	-2.12927	7.14673	6.50877
MMAA	All Targets	RNA	Endogenous	1	1	49	21	17.8842	1	1	166785	FALSE	0.563053	5.82101	-0.615658	5.74703	-2.97787	0.00479459	0.220652	-2.11658	5.41492	5.97951
ABHD2	All Targets	RNA	Endogenous	1	3	63	31	23.4494	1	1	11057	FALSE	0.644824	6.16709	0.60425	6.11084	2.98147	0.00481116	0.220652	-2.13549	6.45057	5.87303
LRRC73	All Targets	RNA	Endogenous	1	3	54	24	16.9239	1	1	221424	FALSE	0.392138	5.73129	-0.607692	5.65653	-2.97382	0.00484697	0.220652	-2.10058	5.30414	5.9032
CPT1A	All Targets	RNA	Endogenous	1	1	40	19	14.205	1	1	1374	FALSE	0.713523	5.5156	-0.637842	5.43669	-2.97139	0.00487875	0.220652	-2.10785	5.03625	5.717
TBC1D8	All Targets	RNA	Endogenous	1	1	39	13	11.0817	1	1	11138	FALSE	0.780929	5.20645	-0.652387	5.11212	-2.97137	0.004879	0.220652	-2.1068	4.68055	5.41422
PTTG1IP	All Targets	RNA	Endogenous	1	8	78	19	21.4975	1	1	754	FALSE	0.150527	6.04853	0.571511	5.98451	2.97089	0.00488528	0.220652	-2.15104	6.33491	5.73923
TFPI2	All Targets	RNA	Endogenous	1	5	44	18	15.5576	1	1	7980	FALSE	0.545357	5.61985	0.564029	5.52734	2.96986	0.0048989	0.220652	-2.13992	5.84468	5.30521
LSR	All Targets	RNA	Endogenous	1	7	45	13	16.6352	1	1	51599	FALSE	0.00141193	5.70682	0.544421	5.62135	2.96897	0.00491053	0.220652	-2.1479	5.93386	5.4026
DAGLB	All Targets	RNA	Endogenous	1	3	63	21	18.4384	1	1	221955	FALSE	-0.249608	5.84443	-0.613738	5.77883	-2.96807	0.0049224	0.220652	-2.12089	5.41183	6.03573
RPS2	All Targets	RNA	Endogenous	1	14	569	55	57.6692	1	1	6187	FALSE	0.515445	7.40763	0.59717	7.38344	2.98257	0.00492532	0.220652	-2.16662	7.76683	7.11508
ZFAND2B	All Targets	RNA	Endogenous	1	1	50	20	16.6149	1	1	130617	FALSE	0.397474	5.72156	-0.593703	5.64769	-2.96785	0.00492533	0.220652	-2.12713	5.29019	5.89794
MIEN1	All Targets	RNA	Endogenous	1	1	36	17	10.665	1	1	84299	FALSE	-0.0333629	5.14011	-0.581077	5.03986	-2.96303	0.00498937	0.220652	-2.11874	4.69197	5.28339
MXD1	All Targets	RNA	Endogenous	1	5	52	21	19.9898	1	1	4084	FALSE	0.0555341	5.9485	0.504203	5.88115	2.96278	0.00499284	0.220652	-2.16854	6.18473	5.66864
MXRA8	All Targets	RNA	Endogenous	1	7	62	28	26.4867	1	1	54587	FALSE	0.366966	6.32869	0.53226	6.27585	2.95965	0.00503479	0.220652	-2.1983	6.58745	6.05774
HS6ST2	All Targets	RNA	Endogenous	1	5	41	16	16.6087	1	1	90161	FALSE	0.0991465	5.70573	0.539381	5.62105	2.95899	0.00504374	0.220652	-2.17705	5.94381	5.39511
C14orf119	All Targets	RNA	Endogenous	1	1	46	19	13.8594	1	1	55017	FALSE	-0.0519047	5.47823	-0.603896	5.4005	-2.95858	0.00504932	0.220652	-2.13271	5.01195	5.67248
RGS8	All Targets	RNA	Endogenous	1	1	46	26	17.8466	1	1	85397	FALSE	-0.323072	5.81077	-0.531422	5.7472	-2.95786	0.00505904	0.220652	-2.15668	5.43187	5.96793
CA13	All Targets	RNA	Endogenous	1	1	54	18	12.2674	1	1	377677	FALSE	-0.150024	5.34126	-0.700682	5.24166	-2.95758	0.00506279	0.220652	-2.12758	4.78475	5.5615
COX8A	All Targets	RNA	Endogenous	1	8	177	41	36.6331	1	1	1351	FALSE	-0.24001	6.77356	0.514432	6.73731	2.95687	0.00507245	0.220652	-2.20242	7.04858	6.51943
LRIT2	All Targets	RNA	Endogenous	1	4	40	18	15.8301	1	1	340745	FALSE	0.15519	5.64185	0.547103	5.55754	2.95679	0.00507355	0.220652	-2.16477	5.90261	5.31599
SALL1	All Targets	RNA	Endogenous	1	1	39	23	14.7428	1	1	6299	FALSE	-0.207742	5.55933	-0.582731	5.48239	-2.95654	0.00507695	0.220652	-2.14633	5.12842	5.73016
IFIH1	All Targets	RNA	Endogenous	1	4	46	17	14.5029	1	1	64135	FALSE	-0.52516	5.5277	0.567305	5.4354	2.9565	0.00507756	0.220652	-2.15986	5.77709	5.19622
OR52H1	All Targets	RNA	Endogenous	1	4	103	19	18.0389	1	1	390067	FALSE	0.47581	5.82564	0.558112	5.73998	2.95608	0.00508316	0.220652	-2.1597	6.04717	5.52494
SLIT2	All Targets	RNA	Endogenous	1	3	111	30	22.1601	1	1	9353	FALSE	0.145313	6.09321	-0.559481	6.04347	-2.95471	0.00510184	0.220652	-2.1514	5.71632	6.27248
FAN1	All Targets	RNA	Endogenous	1	2	42	22	16.0506	1	1	22909	FALSE	-0.00661723	5.66374	-0.597694	5.5887	-2.95423	0.00510846	0.220652	-2.14956	5.22335	5.84444
PIK3R1	All Targets	RNA	Endogenous	1	5	203	36	36.2634	1	1	5295	FALSE	0.240927	6.76419	-0.569021	6.73151	-2.95261	0.00513064	0.220652	-2.17046	6.38595	6.9734
AEN	All Targets	RNA	Endogenous	1	1	41	23	15.6649	1	1	64782	FALSE	-1.53112	5.63751	-0.552629	5.5628	-2.9511	0.00515141	0.220652	-2.16342	5.22521	5.79912
OR51M1	All Targets	RNA	Endogenous	1	1	52	17	15.1297	1	1	390059	FALSE	-0.445926	5.61386	-0.562291	5.51379	-2.95043	0.00516074	0.220652	-2.17718	5.19038	5.74019
C1orf198	All Targets	RNA	Endogenous	1	16	208	64	59.4311	1	1	84886	FALSE	0.325839	7.44826	0.507039	7.42483	2.94857	0.00518637	0.220652	-2.22335	7.70856	7.22622
RPLP2	All Targets	RNA	Endogenous	1	37	929	104	138.105	1	1	6181	FALSE	-0.24682	8.64285	0.639424	8.63213	2.95301	0.00519079	0.220652	-2.17801	9.00436	8.37156
CEMP1	All Targets	RNA	Endogenous	1	1	40	21	13.903	1	1	752014	FALSE	0.414619	5.49641	-0.564145	5.41838	-2.94789	0.00519585	0.220652	-2.1749	5.05285	5.67425
HRK	All Targets	RNA	Endogenous	1	8	117	25	25.5114	1	1	8739	FALSE	-0.415041	6.27993	0.51371	6.22472	2.94782	0.00519691	0.220652	-2.20847	6.52117	6.01721
RASL10A	All Targets	RNA	Endogenous	1	3	51	21	15.1999	1	1	10633	FALSE	-0.266001	5.59061	-0.595443	5.51363	-2.94721	0.00520534	0.220652	-2.15686	5.13147	5.78114
JADE1	All Targets	RNA	Endogenous	1	2	47	18	13.5617	1	1	79960	FALSE	0.000595358	5.44682	-0.647224	5.36107	-2.94704	0.00520774	0.220652	-2.15625	5.01603	5.60259
CTSD	All Targets	RNA	Endogenous	1	13	287	46	45.3927	1	1	1509	FALSE	0.165274	7.07178	0.523128	7.0408	2.9469	0.00520959	0.220652	-2.23826	7.38857	6.79736
LHX9	All Targets	RNA	Endogenous	1	4	25	10	10.132	1	1	56956	FALSE	0.511023	5.07938	0.650005	4.93956	2.9468	0.00521109	0.220652	-2.15718	5.33991	4.65932
HCFC1R1	All Targets	RNA	Endogenous	1	5	80	19	19.7037	1	1	54985	FALSE	0.909608	5.93536	0.592569	5.86458	2.94487	0.00523795	0.22081	-2.18912	6.2234	5.6134
FAM20C	All Targets	RNA	Endogenous	1	6	145	33	30.2241	1	1	56975	FALSE	-0.243013	6.50951	0.512047	6.46574	2.94253	0.00527081	0.22081	-2.22463	6.76938	6.2532
ATP5MC3	All Targets	RNA	Endogenous	1	6	115	32	27.0927	1	1	518	FALSE	0.216513	6.36097	0.57967	6.31044	2.94495	0.00527265	0.22081	-2.22177	6.64707	6.0748
HTN3	All Targets	RNA	Endogenous	1	2	38	19	13.7013	1	1	3347	FALSE	0.520553	5.46319	-0.592996	5.37145	-2.94224	0.00527489	0.22081	-2.18079	5.01911	5.61809
PRODH2	All Targets	RNA	Endogenous	1	1	48	21	14.2102	1	1	58510	FALSE	0.517053	5.51267	-0.618819	5.43117	-2.94216	0.00527604	0.22081	-2.17417	5.03922	5.70553
MYL6	All Targets	RNA	Endogenous	1	8	270	27	33.8368	1	1	4637	FALSE	0.426141	6.66831	0.562165	6.62733	2.93907	0.00531986	0.221771	-2.23103	6.95465	6.39821
MMRN1	All Targets	RNA	Endogenous	1	1	43	19	12.3599	1	1	22915	FALSE	0.15023	5.33415	-0.604844	5.24389	-2.9388	0.00532358	0.221771	-2.17971	4.83593	5.52947
NPFF	All Targets	RNA	Endogenous	1	4	66	22	19.2208	1	1	8620	FALSE	0.261863	5.9038	0.59961	5.83052	2.94259	0.00534074	0.221973	-2.22521	6.20141	5.57089
SRPRB	All Targets	RNA	Endogenous	1	1	39	22	13.2251	1	1	58477	FALSE	0.326373	5.42816	-0.575654	5.35019	-2.93642	0.00535751	0.222158	-2.19278	4.9803	5.60911
NFYC	All Targets	RNA	Endogenous	1	1	48	25	16.8037	1	1	4802	FALSE	-0.0130518	5.73043	-0.584184	5.66237	-2.93527	0.00537399	0.22233	-2.20108	5.33414	5.89214
PNN	All Targets	RNA	Endogenous	1	9	146	42	38.9717	1	1	5411	FALSE	-0.163619	6.86065	0.494958	6.82442	2.93242	0.00541501	0.222881	-2.24643	7.12206	6.61607
CSTL1	All Targets	RNA	Endogenous	1	1	47	19	15.4191	1	1	128817	FALSE	-0.32086	5.62298	-0.575658	5.53952	-2.93234	0.00541622	0.222881	-2.21504	5.2326	5.75436
TTLL1	All Targets	RNA	Endogenous	1	1	39	17	11.4919	1	1	25809	FALSE	0.157725	5.25223	-0.610337	5.15286	-2.93178	0.00542437	0.222881	-2.19806	4.72364	5.45331
KPTN	All Targets	RNA	Endogenous	1	1	35	21	12.9315	1	1	11133	FALSE	0.273555	5.39357	-0.63641	5.30765	-2.93005	0.00544933	0.223398	-2.20008	4.87338	5.61165
TRIM41	All Targets	RNA	Endogenous	1	5	48	20	19.3626	1	1	90933	FALSE	-0.18175	5.90801	0.535577	5.83459	2.92785	0.00548145	0.223716	-2.25558	6.14898	5.61451
NUP35	All Targets	RNA	Endogenous	1	1	49	17	13.2359	1	1	129401	FALSE	0.801926	5.42767	-0.653651	5.34223	-2.92686	0.00549587	0.223716	-2.20514	4.94776	5.61836
C8G	All Targets	RNA	Endogenous	1	1	40	18	13.6694	1	1	733	FALSE	0.0178247	5.46023	-0.570752	5.37458	-2.92517	0.00552076	0.223716	-2.21682	5.0345	5.61264
MDM2	All Targets	RNA	Endogenous	1	1	46	16	13.7249	1	1	4193	FALSE	0.431557	5.46649	-0.594138	5.38275	-2.92486	0.00552527	0.223716	-2.20904	5.02793	5.63113
SMO	All Targets	RNA	Endogenous	1	2	36	16	10.4792	1	1	6608	FALSE	-0.481156	5.1206	-0.64651	5.01186	-2.92485	0.00552544	0.223716	-2.20019	4.56678	5.32342
PTGDS	All Targets	RNA	Endogenous	1	2	111	27	19.5245	1	1	5730	FALSE	0.73773	5.92879	-0.75803	5.87215	-2.97492	0.00553152	0.223716	-2.1865	5.51881	6.11949
RPS12	All Targets	RNA	Endogenous	1	21	640	76	83.5518	1	1	6206	FALSE	0.344311	7.92883	0.520756	7.91216	2.92291	0.00555408	0.223916	-2.26417	8.22966	7.68991
RGS7BP	All Targets	RNA	Endogenous	1	6	60	30	25.1307	1	1	401190	FALSE	-0.00480034	6.25997	0.55881	6.2025	2.92242	0.00556127	0.223916	-2.27202	6.49813	5.99555
PRIMA1	All Targets	RNA	Endogenous	1	6	226	54	43.6675	1	1	145270	FALSE	0.27126	7.02036	-0.5834	6.99398	-2.92059	0.00558845	0.224011	-2.25006	6.64313	7.23958
ZNF432	All Targets	RNA	Endogenous	1	1	50	18	15.602	1	1	9668	FALSE	-0.159474	5.63676	-0.561371	5.55849	-2.92054	0.00558913	0.224011	-2.24388	5.25918	5.76801
TMEM250	All Targets	RNA	Endogenous	1	7	67	30	27.6616	1	1	90120	FALSE	-0.649408	6.38772	0.478679	6.33651	2.91898	0.00561246	0.224011	-2.29246	6.6103	6.14485
RPL35	All Targets	RNA	Endogenous	1	6	226	30	28.8202	1	1	11224	FALSE	0.773655	6.44998	0.517752	6.40201	2.91892	0.00561331	0.224011	-2.26764	6.72515	6.17581
SCGB2A2	All Targets	RNA	Endogenous	1	1	48	19	14.9384	1	1	4250	FALSE	0.350148	5.57593	-0.591553	5.50151	-2.91797	0.0056276	0.224085	-2.23358	5.1445	5.75142
ADIPOR1	All Targets	RNA	Endogenous	1	1	46	15	13.7787	1	1	51094	FALSE	0.143841	5.47155	-0.577757	5.39067	-2.91642	0.00565077	0.224512	-2.23069	5.05231	5.62751
CREB5	All Targets	RNA	Endogenous	1	3	87	18	19.7212	1	1	9586	FALSE	-0.371072	5.93314	-0.585584	5.86965	-2.91446	0.00568031	0.22519	-2.25031	5.57057	6.079
SMARCB1	All Targets	RNA	Endogenous	1	7	60	29	24.7536	1	1	6598	FALSE	0.338304	6.23669	0.488067	6.18115	2.91261	0.00570828	0.225802	-2.29982	6.46807	5.9803
TMA7	All Targets	RNA	Endogenous	1	20	1831	157	210.309	1	1	51372	FALSE	-0.83857	9.24822	0.527463	9.23946	2.91051	0.00574033	0.226574	-2.26024	9.54529	9.02537
C18orf25	All Targets	RNA	Endogenous	1	1	59	17	15.0567	1	1	147339	FALSE	0.0169687	5.58574	-0.633961	5.51354	-2.90879	0.00576656	0.227112	-2.24694	5.12476	5.78568
KIF11	All Targets	RNA	Endogenous	1	1	29	15	10.8782	1	1	3832	FALSE	0.296201	5.1703	-0.654857	5.06993	-2.90788	0.00578057	0.227168	-2.24144	4.61898	5.3856
CYP2W1	All Targets	RNA	Endogenous	1	31	1516	149	242.489	1	1	54905	FALSE	-0.599836	9.45052	0.598933	9.44274	2.90492	0.0058262	0.228463	-2.26678	9.80837	9.18681
FNBP1	All Targets	RNA	Endogenous	1	3	59	31	20.535	1	1	23048	FALSE	0.368184	5.98786	-0.565468	5.9258	-2.90355	0.00584743	0.228798	-2.27888	5.58811	6.16219
MRGPRX1	All Targets	RNA	Endogenous	1	1	55	18	14.1675	1	1	259249	FALSE	-0.346546	5.50756	-0.564295	5.42731	-2.90262	0.00586189	0.228868	-2.27074	5.08003	5.67041
CDC42EP2	All Targets	RNA	Endogenous	1	1	51	21	15.2612	1	1	10435	FALSE	0.0844348	5.60324	-0.575316	5.52935	-2.90045	0.0058956	0.229439	-2.27372	5.17132	5.77998
CASD1	All Targets	RNA	Endogenous	1	1	34	16	11.0698	1	1	64921	FALSE	0.555873	5.19664	-0.627344	5.09163	-2.90005	0.00590197	0.229439	-2.2617	4.69591	5.36864
PLXND1	All Targets	RNA	Endogenous	1	3	42	26	20.3631	1	1	23129	FALSE	0.653738	5.97784	0.561389	5.9096	2.89998	0.00593587	0.229666	-2.32907	6.22878	5.68618
PER1	All Targets	RNA	Endogenous	1	2	98	19	17.659	1	1	5187	FALSE	0.550286	5.79767	-0.775344	5.72612	-2.95309	0.0059431	0.229666	-2.23901	5.32719	6.00537
LRRFIP2	All Targets	RNA	Endogenous	1	3	51	25	21.5343	1	1	9209	FALSE	-0.783866	6.05077	0.482854	5.98891	2.89724	0.00594601	0.229666	-2.32586	6.27108	5.79139
GATM	All Targets	RNA	Endogenous	1	7	166	27	29.0101	1	1	2628	FALSE	-0.14944	6.45582	0.526733	6.40902	2.89464	0.00598717	0.230599	-2.32671	6.73426	6.18136
WDR35	All Targets	RNA	Endogenous	1	2	44	11	11.0729	1	1	57539	FALSE	0.204414	5.1935	0.659479	5.07123	2.89354	0.0060046	0.230599	-2.27815	5.4236	4.82458
OR4D5	All Targets	RNA	Endogenous	1	2	45	20	12.4994	1	1	219875	FALSE	0.673151	5.3487	-0.635955	5.24114	-2.89294	0.00601417	0.230599	-2.27267	4.88813	5.48824
MADCAM1	All Targets	RNA	Endogenous	1	1	38	13	11.3094	1	1	8174	FALSE	-0.365528	5.22405	-0.663245	5.11371	-2.89174	0.00603341	0.230599	-2.28166	4.69961	5.40358
KRT26	All Targets	RNA	Endogenous	1	2	43	11	11.9301	1	1	353288	FALSE	0.50667	5.29177	-0.722169	5.17588	-2.90459	0.00603407	0.230599	-2.26835	4.81301	5.4299
KRAS	All Targets	RNA	Endogenous	1	11	129	35	36.8039	1	1	3845	FALSE	-0.0535434	6.77986	0.497828	6.74163	2.89081	0.00604828	0.230653	-2.38058	6.99833	6.56193
SPEF1	All Targets	RNA	Endogenous	1	3	53	22	15.4959	1	1	25876	FALSE	0.183046	5.61899	-0.602381	5.53733	-2.88902	0.00607698	0.231118	-2.28246	5.18004	5.78743
GOLIM4	All Targets	RNA	Endogenous	1	3	72	18	17.9665	1	1	27333	FALSE	0.245516	5.81169	0.552524	5.73792	2.88816	0.00609087	0.231118	-2.32346	6.09629	5.48707
RGS18	All Targets	RNA	Endogenous	1	7	57	24	23.5283	1	1	64407	FALSE	-0.0412156	6.16969	0.466586	6.10837	2.88765	0.0060991	0.231118	-2.37943	6.3848	5.91488
AP5Z1	All Targets	RNA	Endogenous	1	1	56	20	17.8348	1	1	9907	FALSE	0.919969	5.8264	-0.597851	5.7448	-2.88951	0.00611172	0.231118	-2.33003	5.37049	6.00681
GRB7	All Targets	RNA	Endogenous	1	1	39	16	12.4459	1	1	2886	FALSE	0.306888	5.34028	-0.571612	5.24621	-2.88366	0.00616376	0.232598	-2.30702	4.91952	5.4749
TLR5	All Targets	RNA	Endogenous	1	2	41	21	13.907	1	1	7100	FALSE	-0.124696	5.47941	-0.609993	5.39339	-2.87988	0.00622565	0.233754	-2.314	5.00131	5.66785
VIPR1	All Targets	RNA	Endogenous	1	1	40	25	15.5023	1	1	7433	FALSE	0.621577	5.63016	-0.624899	5.55414	-2.87983	0.00622644	0.233754	-2.32364	5.12228	5.85645
RACK1	All Targets	RNA	Endogenous	1	12	340	32	38.2727	1	1	10399	FALSE	0.29802	6.83636	0.50353	6.80022	2.87861	0.00624654	0.233754	-2.38782	7.11042	6.58308
SIX5	All Targets	RNA	Endogenous	1	4	39	19	15.3901	1	1	147912	FALSE	0.268423	5.6182	-0.621396	5.51908	-2.87856	0.00624735	0.233754	-2.32088	5.15739	5.77227
NCAM1	All Targets	RNA	Endogenous	1	1	98	29	22.0947	1	1	4684	FALSE	-0.694488	6.09666	-0.541629	6.05078	-2.87785	0.00625919	0.233754	-2.33576	5.74386	6.26563
CST3	All Targets	RNA	Endogenous	1	3	225	45	40.1961	1	1	1471	FALSE	0.265925	6.9092	-0.635983	6.88195	-2.88953	0.0062763	0.233909	-2.33687	6.48801	7.15771
FBXO2	All Targets	RNA	Endogenous	1	2	38	17	12.3558	1	1	26232	FALSE	0.219507	5.32564	-0.580507	5.23243	-2.87427	0.00631854	0.234998	-2.32351	4.87375	5.48351
MICU1	All Targets	RNA	Endogenous	1	2	42	17	14.8477	1	1	10367	FALSE	-0.374117	5.56036	-0.528061	5.48081	-2.87048	0.00638208	0.235913	-2.34102	5.15444	5.70927
CCDC71L	All Targets	RNA	Endogenous	1	3	45	14	12.6952	1	1	168455	FALSE	-0.0156353	5.35761	0.563616	5.25696	2.87008	0.00638878	0.235913	-2.34026	5.62402	5.00001
ENTPD2	All Targets	RNA	Endogenous	1	3	61	23	16.3956	1	1	954	FALSE	0.403758	5.68821	-0.556667	5.61658	-2.86977	0.00639406	0.235913	-2.33842	5.29758	5.83988
SLC2A9	All Targets	RNA	Endogenous	1	2	32	15	11.2766	1	1	56606	FALSE	-0.052475	5.23542	-0.633856	5.10714	-2.86958	0.00639723	0.235913	-2.3237	4.66047	5.4198
SLC38A9	All Targets	RNA	Endogenous	1	2	45	17	13.3213	1	1	153129	FALSE	0.435123	5.42105	-0.585086	5.33761	-2.86891	0.00640854	0.235913	-2.33174	4.97277	5.593
ARHGEF12	All Targets	RNA	Endogenous	1	5	73	28	21.2315	1	1	23365	FALSE	-0.0666877	6.03336	0.55278	5.97067	2.86802	0.00642365	0.235987	-2.35958	6.27772	5.75574
HMX1	All Targets	RNA	Endogenous	1	6	83	20	20.846	1	1	3166	FALSE	-0.349281	6.00904	0.520541	5.94272	2.86652	0.00644908	0.23644	-2.38127	6.24125	5.73375
CHD9	All Targets	RNA	Endogenous	1	6	50	18	16.0353	1	1	80205	FALSE	-0.715568	5.65756	0.516476	5.57354	2.86409	0.00649053	0.237477	-2.37387	5.86245	5.37131
GFAP	All Targets	RNA	Endogenous	1	2	56	25	16.856	1	1	2670	FALSE	0.134943	5.73042	-0.585879	5.65871	-2.86159	0.00653339	0.23823	-2.36291	5.30876	5.90368
ZNF365	All Targets	RNA	Endogenous	1	1	43	12	11.4287	1	1	22891	FALSE	0.312726	5.23401	-0.650118	5.13987	-2.86135	0.00653752	0.23823	-2.34369	4.79864	5.37874
PRICKLE3	All Targets	RNA	Endogenous	1	2	40	18	14.516	1	1	4007	FALSE	0.537407	5.53432	-0.587337	5.44469	-2.86026	0.0065563	0.238241	-2.357	5.1181	5.6733
OR13C5	All Targets	RNA	Endogenous	1	1	28	9	8.93935	1	1	138799	FALSE	0.293906	4.94714	-0.652101	4.78929	-2.8598	0.00656425	0.238241	-2.33363	4.38677	5.07106
DIP2C-AS1	All Targets	RNA	Endogenous	1	1	42	17	13.2616	1	1	414235	FALSE	0.613451	5.42581	-0.612215	5.33457	-2.85814	0.00659305	0.238806	-2.36651	4.97259	5.58796
IRAK1	All Targets	RNA	Endogenous	1	8	57	22	20.3855	1	1	3654	FALSE	0.107677	5.97612	0.468143	5.90618	2.85345	0.0066749	0.240781	-2.43476	6.19213	5.70602
TMEM204	All Targets	RNA	Endogenous	1	1	34	16	11.9422	1	1	79652	FALSE	0.141219	5.28915	-0.612636	5.18578	-2.85273	0.00668748	0.240781	-2.37165	4.85966	5.41406
OTUD6B	All Targets	RNA	Endogenous	1	5	44	20	18.6095	1	1	51633	FALSE	-0.338712	5.85686	0.498661	5.78102	2.85174	0.00670492	0.240781	-2.42215	6.08081	5.57117
HNRNPU	All Targets	RNA	Endogenous	1	8	183	40	40.2753	1	1	3192	FALSE	-0.511895	6.90853	0.555641	6.87369	2.85771	0.00672402	0.240781	-2.44612	7.1465	6.68273
AXDND1	All Targets	RNA	Endogenous	1	2	43	19	17.115	1	1	126859	FALSE	0.25784	5.74831	-0.544878	5.6736	-2.84963	0.00674235	0.240781	-2.39789	5.3577	5.89474
CCL26	All Targets	RNA	Endogenous	1	6	42	21	18.9649	1	1	10344	FALSE	-0.799887	5.88014	0.500005	5.80508	2.8495	0.00674466	0.240781	-2.44386	6.11314	5.58944
BCKDHB	All Targets	RNA	Endogenous	1	2	41	19	14.9015	1	1	594	FALSE	-0.417878	5.56705	-0.559787	5.48451	-2.84821	0.00676753	0.240781	-2.38607	5.17306	5.70253
ARRDC1	All Targets	RNA	Endogenous	1	5	83	27	25.8779	1	1	92714	FALSE	-0.103421	6.29872	0.50714	6.24711	2.84817	0.00676827	0.240781	-2.4305	6.55781	6.02962
CFAP74	All Targets	RNA	Endogenous	1	1	45	15	12.3023	1	1	85452	FALSE	0.683171	5.33697	-0.655385	5.23657	-2.84762	0.00677808	0.240781	-2.37816	4.81731	5.53005
TAGLN	All Targets	RNA	Endogenous	1	3	101	28	26.3085	1	1	6876	FALSE	0.369654	6.32368	-0.569813	6.2783	-2.84745	0.00678106	0.240781	-2.40918	5.91509	6.53254
PROX1	All Targets	RNA	Endogenous	1	1	40	26	14.3091	1	1	5629	FALSE	-0.319912	5.52336	-0.567416	5.44227	-2.84056	0.00690479	0.244164	-2.40998	5.04948	5.71723
ITSN2	All Targets	RNA	Endogenous	1	1	47	18	14.2025	1	1	50618	FALSE	0.207607	5.50881	-0.554247	5.43257	-2.84031	0.00690927	0.244164	-2.40679	5.112	5.65697
ELK3	All Targets	RNA	Endogenous	1	6	64	19	19.6526	1	1	2004	FALSE	-0.775352	5.92689	0.489618	5.85924	2.83989	0.00691695	0.244164	-2.43958	6.12404	5.67388
IL5RA	All Targets	RNA	Endogenous	1	1	32	15	12.9218	1	1	3568	FALSE	0.630448	5.39705	-0.56212	5.29519	-2.83857	0.00694103	0.244461	-2.40973	4.96724	5.52476
FSHR	All Targets	RNA	Endogenous	1	2	48	24	16.4252	1	1	2492	FALSE	-0.350227	5.69542	-0.536181	5.62545	-2.83732	0.00696369	0.244461	-2.41819	5.30121	5.85241
UBXN7	All Targets	RNA	Endogenous	1	6	53	18	16.3319	1	1	26043	FALSE	-0.218275	5.68406	0.505999	5.59829	2.8372	0.00696602	0.244461	-2.43528	5.89011	5.39401
TTC30B	All Targets	RNA	Endogenous	1	1	34	15	12.5232	1	1	150737	FALSE	-0.294178	5.35349	-0.573901	5.25339	-2.83555	0.00699611	0.244873	-2.41397	4.91681	5.48899
CFAP77	All Targets	RNA	Endogenous	1	1	40	17	13.3455	1	1	389799	FALSE	0.912961	5.43725	-0.621132	5.34668	-2.83507	0.00700491	0.244873	-2.41462	4.94916	5.62494
CHRNA1	All Targets	RNA	Endogenous	1	5	45	20	17.623	1	1	1134	FALSE	0.175466	5.78309	0.55194	5.70313	2.83429	0.0070193	0.244902	-2.45789	5.98716	5.50431
MTFR1L	All Targets	RNA	Endogenous	1	1	53	15	12.1858	1	1	56181	FALSE	0.47562	5.3231	-0.613787	5.23773	-2.83336	0.00703638	0.245024	-2.41063	4.86663	5.49749
MAGEA1	All Targets	RNA	Endogenous	1	4	43	17	16.4042	1	1	4100	FALSE	-0.0335065	5.69041	0.510125	5.60661	2.831	0.00708003	0.246068	-2.45423	5.90254	5.39946
ACBD3	All Targets	RNA	Endogenous	1	2	45	23	15.7346	1	1	64746	FALSE	-0.225582	5.63767	-0.540894	5.56187	-2.82821	0.00713193	0.247315	-2.43622	5.21392	5.80544
SYNDIG1L	All Targets	RNA	Endogenous	1	1	74	20	14.4329	1	1	646658	FALSE	0.137844	5.532	-0.628319	5.45544	-2.82734	0.00714815	0.247315	-2.42611	5.02875	5.75413
KRT31	All Targets	RNA	Endogenous	1	2	36	20	13.4224	1	1	3881	FALSE	-0.716059	5.43153	-0.574876	5.34364	-2.82664	0.0071613	0.247315	-2.42504	4.9833	5.59588
ABCA6	All Targets	RNA	Endogenous	1	2	54	25	17.5748	1	1	23460	FALSE	0.198417	5.78392	-0.508909	5.7105	-2.82614	0.00717073	0.247315	-2.45634	5.40178	5.9266
CACNG4	All Targets	RNA	Endogenous	1	3	36	17	14.1747	1	1	27092	FALSE	0.184123	5.5048	-0.559274	5.40933	-2.82427	0.00720589	0.247809	-2.44024	5.0591	5.6545
PLPP4	All Targets	RNA	Endogenous	1	7	73	21	20.4482	1	1	196051	FALSE	-0.207505	5.98049	0.526932	5.91275	2.82358	0.00721889	0.247809	-2.48221	6.22835	5.69183
GDI2	All Targets	RNA	Endogenous	1	7	137	33	26.7555	1	1	2665	FALSE	0.140028	6.34343	0.470931	6.29322	2.82319	0.00722628	0.247809	-2.49857	6.58911	6.0861
COL8A1	All Targets	RNA	Endogenous	1	6	73	21	20.2439	1	1	1295	FALSE	-0.224635	5.96845	0.563446	5.90073	2.82015	0.00728389	0.249077	-2.48252	6.21035	5.68399
CCDC68	All Targets	RNA	Endogenous	1	6	53	26	21.1861	1	1	80323	FALSE	-0.0686825	6.03151	0.504906	5.96326	2.81912	0.00730361	0.249077	-2.49078	6.2745	5.74539
RNF111	All Targets	RNA	Endogenous	1	3	61	22	16.4619	1	1	54778	FALSE	-0.0758362	5.69369	-0.575945	5.6175	-2.81821	0.00732101	0.249077	-2.45054	5.28265	5.8519
GPC2	All Targets	RNA	Endogenous	1	4	39	13	13.1974	1	1	221914	FALSE	0.581812	5.4081	0.559182	5.30362	2.81801	0.00732483	0.249077	-2.45876	5.63327	5.07286
PDE11A	All Targets	RNA	Endogenous	1	2	41	16	12.1053	1	1	50940	FALSE	-0.0369005	5.29875	-0.580956	5.2041	-2.81762	0.0073323	0.249077	-2.44069	4.83932	5.45945
PLRG1	All Targets	RNA	Endogenous	1	1	41	15	13.4869	1	1	5356	FALSE	0.312984	5.44525	-0.645987	5.36206	-2.81635	0.00736609	0.249495	-2.44923	4.99974	5.61569
TMEM268	All Targets	RNA	Endogenous	1	1	51	21	15.4905	1	1	203197	FALSE	0.556443	5.62986	-0.583643	5.55802	-2.81554	0.00737226	0.249495	-2.4666	5.20768	5.80326
ADRB2	All Targets	RNA	Endogenous	1	1	66	19	17.4579	1	1	154	FALSE	0.224378	5.78449	-0.543308	5.71485	-2.81209	0.00743888	0.251278	-2.49037	5.38841	5.94336
LPCAT1	All Targets	RNA	Endogenous	1	3	41	11	10.5923	1	1	79888	FALSE	-0.0294154	5.12803	0.561	5.0045	2.81069	0.00746622	0.25173	-2.45495	5.36808	4.74999
TLL1	All Targets	RNA	Endogenous	1	5	48	24	18.1634	1	1	7092	FALSE	0.210813	5.82135	0.500565	5.74775	2.80934	0.00749256	0.252147	-2.50673	6.04312	5.54099
FBN3	All Targets	RNA	Endogenous	1	5	118	30	25.961	1	1	84467	FALSE	-0.418626	6.30954	0.510054	6.25623	2.80709	0.0075365	0.253154	-2.50967	6.55959	6.04388
DSCC1	All Targets	RNA	Endogenous	1	1	42	18	14.1163	1	1	79075	FALSE	0.45132	5.50572	-0.580281	5.42338	-2.80495	0.00757876	0.25368	-2.4805	5.06947	5.67111
SAFB	All Targets	RNA	Endogenous	1	5	75	25	21.096	1	1	6294	FALSE	-0.0529589	6.02315	0.535559	5.95999	2.80439	0.00758984	0.25368	-2.52313	6.26208	5.74853
LRIG2	All Targets	RNA	Endogenous	1	1	49	22	14.7055	1	1	9860	FALSE	0.358926	5.55458	-0.573616	5.48073	-2.80318	0.00761384	0.25368	-2.48224	5.16256	5.70346
NUCB2	All Targets	RNA	Endogenous	1	5	41	12	12.9978	1	1	4925	FALSE	-0.526337	5.38675	0.544366	5.28027	2.80301	0.00761725	0.25368	-2.49613	5.6512	5.02063
SMIM3	All Targets	RNA	Endogenous	1	1	47	18	12.9344	1	1	85027	FALSE	0.663436	5.39623	-0.570864	5.30679	-2.80274	0.0076225	0.25368	-2.49426	4.93634	5.56611
NPBWR1	All Targets	RNA	Endogenous	1	1	32	13	9.3555	1	1	2831	FALSE	0.433574	4.98823	-0.605522	4.87351	-2.80157	0.00764577	0.253986	-2.47556	4.44242	5.17528
PDLIM4	All Targets	RNA	Endogenous	1	11	243	38	37.5986	1	1	8572	FALSE	-0.234846	6.80988	0.479555	6.77281	2.79989	0.00767932	0.254632	-2.57437	7.06288	6.56977
ALG10B	All Targets	RNA	Endogenous	1	3	48	16	14.1434	1	1	144245	FALSE	-0.0171109	5.49817	0.559237	5.4056	2.79812	0.00771489	0.255025	-2.50217	5.77041	5.15023
AAGAB	All Targets	RNA	Endogenous	1	9	55	21	19.9376	1	1	79719	FALSE	-0.213028	5.94923	0.532135	5.87541	2.79825	0.00771946	0.255025	-2.56222	6.20077	5.64766
OR4A5	All Targets	RNA	Endogenous	1	2	41	19	13.5866	1	1	81318	FALSE	0.109348	5.45097	-0.607514	5.35528	-2.79661	0.00774525	0.255409	-2.48639	4.95412	5.63609
MRPL41	All Targets	RNA	Endogenous	1	6	85	24	24.2032	1	1	64975	FALSE	-0.457802	6.20754	0.480185	6.15007	2.7951	0.00777574	0.255783	-2.55663	6.43106	5.95338
TRIO	All Targets	RNA	Endogenous	1	5	79	26	24.1671	1	1	7204	FALSE	-0.173737	6.2036	0.470006	6.14823	2.79464	0.00778495	0.255783	-2.55729	6.40907	5.96565
GPR45	All Targets	RNA	Endogenous	1	2	34	14	12.0547	1	1	11250	FALSE	0.420872	5.29389	0.558199	5.18551	2.78285	0.00802733	0.263267	-2.53629	5.51815	4.95265
GDPGP1	All Targets	RNA	Endogenous	1	2	55	17	14.9413	1	1	390637	FALSE	0.508248	5.57063	-0.573665	5.49522	-2.78086	0.00806877	0.264085	-2.53466	5.14739	5.73869
SYNPO2L	All Targets	RNA	Endogenous	1	1	41	20	14.1259	1	1	79933	FALSE	-0.813723	5.50803	-0.564619	5.42252	-2.78025	0.00808156	0.264085	-2.54387	5.05484	5.67989
MFSD9	All Targets	RNA	Endogenous	1	1	33	17	10.3499	1	1	84804	FALSE	0.607561	5.1141	-0.628698	5.00121	-2.7792	0.00810367	0.264329	-2.51744	4.55245	5.31535
RND2	All Targets	RNA	Endogenous	1	1	57	21	14.5234	1	1	8153	FALSE	0.106762	5.54072	-0.570034	5.46227	-2.77706	0.00814876	0.264879	-2.53568	5.12878	5.6957
FHIT	All Targets	RNA	Endogenous	1	1	38	20	12.862	1	1	2272	FALSE	0.248579	5.38615	-0.562872	5.29217	-2.777	0.0081499	0.264879	-2.54289	4.92614	5.5484
MAP2K5	All Targets	RNA	Endogenous	1	6	46	24	20.7645	1	1	5607	FALSE	0.44355	6.00438	0.541509	5.93358	2.78008	0.00817059	0.265074	-2.61017	6.25815	5.70639
C8orf86	All Targets	RNA	Endogenous	1	1	35	17	11.7177	1	1	389649	FALSE	0.764819	5.27367	-0.561707	5.18055	-2.77368	0.00822054	0.266216	-2.55391	4.84149	5.41789
TMEM242	All Targets	RNA	Endogenous	1	1	42	17	12.6068	1	1	729515	FALSE	0.280952	5.35647	-0.563472	5.27073	-2.77055	0.00828739	0.267499	-2.55096	4.92904	5.50991
SPTA1	All Targets	RNA	Endogenous	1	4	31	12	11.5491	1	1	6708	FALSE	0.166519	5.23574	0.542584	5.11751	2.77044	0.00828982	0.267499	-2.55714	5.42622	4.90142
AADACL2	All Targets	RNA	Endogenous	1	1	38	14	11.6332	1	1	344752	FALSE	0.451713	5.26885	-0.574611	5.1699	-2.76914	0.00831762	0.267872	-2.56357	4.78594	5.43867
SSRP1	All Targets	RNA	Endogenous	1	4	79	30	22.3477	1	1	6749	FALSE	0.326518	6.10195	0.52689	6.04402	2.76807	0.00834072	0.267872	-2.59499	6.3958	5.79778
PA2G4	All Targets	RNA	Endogenous	1	2	74	27	22.8947	1	1	5036	FALSE	0.539727	6.14065	-0.518802	6.08508	-2.76737	0.00835585	0.267872	-2.58966	5.76294	6.31058
LUC7L	All Targets	RNA	Endogenous	1	2	69	25	16.305	1	1	55692	FALSE	0.402568	5.68726	-0.653513	5.61736	-2.76911	0.00836951	0.267872	-2.55125	5.20418	5.90658
SMIM19	All Targets	RNA	Endogenous	1	7	62	33	25.3587	1	1	114926	FALSE	-0.850453	6.27004	0.464055	6.2167	2.76553	0.00839573	0.267872	-2.62744	6.49391	6.02266
ACAN	All Targets	RNA	Endogenous	1	1	54	18	14.8291	1	1	176	FALSE	0.112078	5.5705	-0.571279	5.48776	-2.76511	0.00840493	0.267872	-2.5716	5.15256	5.7224
RPL23	All Targets	RNA	Endogenous	1	21	514	91	98.1326	1	1	9349	FALSE	0.402642	8.15851	0.706896	8.14236	2.84365	0.00840535	0.267872	-2.55475	8.53942	7.86442
GPKOW	All Targets	RNA	Endogenous	1	2	68	23	18.3297	1	1	27238	FALSE	0.110854	5.8394	-0.548527	5.77275	-2.76289	0.00845326	0.268671	-2.58055	5.45747	5.99345
PPT1	All Targets	RNA	Endogenous	1	4	88	20	17.0479	1	1	5538	FALSE	0.426307	5.74	0.532188	5.66118	2.76257	0.00846021	0.268671	-2.60982	6.00819	5.41827
TM7SF3	All Targets	RNA	Endogenous	1	8	55	26	22.6672	1	1	51768	FALSE	-0.345429	6.11771	0.474855	6.05755	2.75888	0.00854148	0.270256	-2.65095	6.33592	5.86268
SREBF2	All Targets	RNA	Endogenous	1	2	81	19	15.6808	1	1	6721	FALSE	0.378247	5.63472	-0.579581	5.56242	-2.75844	0.00855121	0.270256	-2.57404	5.2579	5.77557
PPARA	All Targets	RNA	Endogenous	1	2	48	15	13.4536	1	1	5465	FALSE	-0.284988	5.43127	-0.548899	5.34359	-2.75826	0.00855506	0.270256	-2.56808	5.03859	5.5571
MNS1	All Targets	RNA	Endogenous	1	1	31	15	11.636	1	1	55329	FALSE	-0.434549	5.26551	-0.643516	5.15371	-2.75737	0.00857485	0.270407	-2.56922	4.69517	5.47469
KCTD10	All Targets	RNA	Endogenous	1	7	52	23	23.0713	1	1	83892	FALSE	0.133154	6.14471	0.547365	6.08178	2.7585	0.00862737	0.271118	-2.64718	6.40045	5.85872
TMEM131L	All Targets	RNA	Endogenous	1	2	54	23	15.9747	1	1	23240	FALSE	0.0792566	5.65828	-0.562841	5.58253	-2.75449	0.00863869	0.271118	-2.58177	5.24538	5.81853
ANKRD10	All Targets	RNA	Endogenous	1	9	111	39	34.5553	1	1	55608	FALSE	-0.546255	6.69261	0.439802	6.65323	2.75433	0.00864246	0.271118	-2.67366	6.90528	6.4768
SPINK1	All Targets	RNA	Endogenous	1	5	43	14	13.6783	1	1	6690	FALSE	0.0738783	5.45841	0.567569	5.34873	2.7515	0.00870581	0.272184	-2.62584	5.61091	5.1652
ABCG1	All Targets	RNA	Endogenous	1	2	42	23	15.801	1	1	9619	FALSE	0.0898824	5.64253	-0.547723	5.56807	-2.75146	0.00870664	0.272184	-2.59727	5.22356	5.80922
NKAIN3	All Targets	RNA	Endogenous	1	2	51	13	12.3215	1	1	286183	FALSE	0.835651	5.32727	-0.631822	5.22292	-2.75214	0.00873229	0.272514	-2.59168	4.9709	5.39934
ANKRD9	All Targets	RNA	Endogenous	1	1	42	13	10.5435	1	1	122416	FALSE	0.555365	5.1397	-0.530938	5.04365	-2.74861	0.00877096	0.272715	-2.60468	4.75558	5.2453
CACYBP	All Targets	RNA	Endogenous	1	4	34	17	14.8888	1	1	27101	FALSE	0.13352	5.56277	0.514081	5.46838	2.74809	0.00878262	0.272715	-2.64019	5.76604	5.26001
OSBPL6	All Targets	RNA	Endogenous	1	3	41	22	14.0099	1	1	114880	FALSE	0.0532018	5.48272	-0.55733	5.39573	-2.74803	0.00878409	0.272715	-2.59066	5.07267	5.62188
UNC5A	All Targets	RNA	Endogenous	1	2	50	20	16.3577	1	1	90249	FALSE	0.00386395	5.6875	-0.541689	5.61256	-2.74597	0.00883069	0.273691	-2.60991	5.28147	5.84432
DELE1	All Targets	RNA	Endogenous	1	3	144	40	43.2279	1	1	9812	FALSE	-0.084972	7.00693	-0.519972	6.97938	-2.74243	0.00891168	0.275195	-2.65273	6.67252	7.19418
VTCN1	All Targets	RNA	Endogenous	1	2	45	23	17.1653	1	1	79679	FALSE	0.409592	5.75479	-0.564668	5.67969	-2.74152	0.00893253	0.275195	-2.62576	5.33133	5.92355
KANSL3	All Targets	RNA	Endogenous	1	1	65	18	12.325	1	1	55683	FALSE	1.19564	5.34039	-0.749349	5.25435	-2.79765	0.00893278	0.275195	-2.57596	4.87361	5.52088
PRKDC	All Targets	RNA	Endogenous	1	2	65	29	21.8416	1	1	5591	FALSE	-0.132648	6.07511	0.500481	6.01499	2.74119	0.00894026	0.275195	-2.68188	6.32478	5.79814
CWH43	All Targets	RNA	Endogenous	1	3	38	16	14.5087	1	1	80157	FALSE	-0.188227	5.5281	0.551612	5.438	2.73998	0.00896818	0.275233	-2.63919	5.73318	5.23137
IGFL1	All Targets	RNA	Endogenous	1	2	42	18	14.4091	1	1	374918	FALSE	0.208567	5.52375	-0.567131	5.43588	-2.73975	0.00897334	0.275233	-2.62292	5.08116	5.68419
ZNF394	All Targets	RNA	Endogenous	1	6	50	24	20.4595	1	1	84124	FALSE	-0.399743	5.98052	0.475358	5.91334	2.73915	0.00898726	0.275233	-2.68498	6.2082	5.70694
ZNHIT1	All Targets	RNA	Endogenous	1	7	83	24	23.4538	1	1	10467	FALSE	-0.510566	6.16506	0.484192	6.10644	2.73827	0.00900756	0.275387	-2.68207	6.39818	5.90221
CNTNAP4	All Targets	RNA	Endogenous	1	1	30	19	12.1326	1	1	85445	FALSE	0.906779	5.31604	-0.678955	5.21528	-2.75883	0.0090232	0.275398	-2.60862	4.73321	5.55272
NTRK2	All Targets	RNA	Endogenous	1	2	146	27	22.3722	1	1	4915	FALSE	0.170238	6.10547	-0.548578	6.05611	-2.73672	0.00904374	0.275559	-2.63535	5.7485	6.27143
TSEN15	All Targets	RNA	Endogenous	1	2	55	24	16.4445	1	1	116461	FALSE	-0.824108	5.69322	-0.526166	5.62155	-2.7339	0.00910956	0.277097	-2.62893	5.30897	5.84037
ZNF146	All Targets	RNA	Endogenous	1	1	59	36	20.7527	1	1	7705	FALSE	0.335489	6.0133	-0.500249	5.96063	-2.73051	0.00918923	0.279049	-2.67825	5.65062	6.17764
OR5D14	All Targets	RNA	Endogenous	1	3	44	15	12.5771	1	1	219436	FALSE	-0.836825	5.34515	0.526359	5.24284	2.72912	0.00922215	0.279578	-2.64595	5.5413	5.03392
DKK4	All Targets	RNA	Endogenous	1	2	36	18	11.7309	1	1	27121	FALSE	-0.432064	5.26537	-0.590616	5.16845	-2.7267	0.00927958	0.280392	-2.62988	4.77897	5.44109
TXNDC8	All Targets	RNA	Endogenous	1	3	41	9	12.352	1	1	255220	FALSE	0.163051	5.32572	0.555853	5.21401	2.72668	0.00928006	0.280392	-2.65598	5.58886	4.95161
ZNF230	All Targets	RNA	Endogenous	1	1	44	14	11.8113	1	1	7773	FALSE	0.462064	5.28207	-0.577903	5.19423	-2.72536	0.00931163	0.280838	-2.6473	4.78823	5.47844
TUFT1	All Targets	RNA	Endogenous	1	2	40	11	11.0242	1	1	7286	FALSE	0.88697	5.19113	-0.728921	5.08017	-2.75258	0.00932599	0.280838	-2.61583	4.74691	5.31345
GABRB2	All Targets	RNA	Endogenous	1	1	43	24	14.5355	1	1	2561	FALSE	-0.304099	5.54368	-0.529077	5.46166	-2.72183	0.00939647	0.282143	-2.67115	5.11289	5.70579
SDHAF4	All Targets	RNA	Endogenous	1	2	49	22	16.4341	1	1	135154	FALSE	-0.261143	5.69162	-0.521603	5.61882	-2.72076	0.00942208	0.282143	-2.66539	5.30989	5.83507
EEF1D	All Targets	RNA	Endogenous	1	13	244	36	39.705	1	1	1936	FALSE	-0.0283308	6.88617	0.421437	6.8519	2.7203	0.00943336	0.282143	-2.74704	7.08814	6.68654
LDHB	All Targets	RNA	Endogenous	1	4	143	20	23.6579	1	1	3945	FALSE	0.366612	6.17888	0.510823	6.12196	2.71991	0.00944285	0.282143	-2.69892	6.41739	5.91517
TSEN2	All Targets	RNA	Endogenous	1	1	47	16	11.0771	1	1	80746	FALSE	0.420711	5.19617	-0.567016	5.09808	-2.71971	0.00944751	0.282143	-2.64587	4.7641	5.33186
SEC31B	All Targets	RNA	Endogenous	1	1	38	15	13.8405	1	1	25956	FALSE	-0.409925	5.47737	-0.547215	5.39014	-2.71804	0.00948822	0.282155	-2.67849	5.06686	5.61643
ZNF93	All Targets	RNA	Endogenous	1	1	47	18	14.9139	1	1	81931	FALSE	0.753869	5.58017	-0.563486	5.50316	-2.7179	0.00949157	0.282155	-2.67842	5.15949	5.74373
TCEAL9	All Targets	RNA	Endogenous	1	4	111	20	20.5796	1	1	51186	FALSE	0.365923	5.9921	0.498585	5.92455	2.71705	0.00951235	0.282155	-2.72145	6.17244	5.75104
BEX5	All Targets	RNA	Endogenous	1	2	36	16	13.221	1	1	340542	FALSE	0.200915	5.42117	0.494295	5.32096	2.71701	0.00951331	0.282155	-2.70984	5.64735	5.09249
CNOT4	All Targets	RNA	Endogenous	1	1	45	23	14.725	1	1	4850	FALSE	-0.139856	5.55625	-0.529245	5.48274	-2.71612	0.00953502	0.282155	-2.67588	5.13443	5.72655
PLP2	All Targets	RNA	Endogenous	1	9	83	27	24.538	1	1	5355	FALSE	-0.837498	6.22438	0.437964	6.16815	2.71584	0.00954178	0.282155	-2.74841	6.42369	5.98927
HINT2	All Targets	RNA	Endogenous	1	5	56	20	19.0877	1	1	84681	FALSE	-0.0156483	5.88822	0.482947	5.81467	2.71303	0.0096108	0.283327	-2.73434	6.10807	5.60929
KBTBD2	All Targets	RNA	Endogenous	1	2	57	23	16.3011	1	1	25948	FALSE	-0.441539	5.68474	-0.517041	5.61928	-2.71252	0.0096234	0.283327	-2.68465	5.2886	5.85075
KCNAB2	All Targets	RNA	Endogenous	1	2	53	32	20.5953	1	1	8514	FALSE	0.0621277	5.99198	-0.497444	5.93448	-2.71199	0.00963644	0.283327	-2.71047	5.63754	6.14235
MVB12A	All Targets	RNA	Endogenous	1	1	36	28	14.7515	1	1	93343	FALSE	0.280451	5.55958	-0.515457	5.4816	-2.71167	0.00964423	0.283327	-2.68829	5.17568	5.69574
ADAMTS9	All Targets	RNA	Endogenous	1	4	158	23	22.7423	1	1	56999	FALSE	0.439551	6.12873	-0.602911	6.07425	-2.71023	0.00967987	0.283337	-2.68574	5.72767	6.31686
CADM2	All Targets	RNA	Endogenous	1	1	50	20	17.4536	1	1	253559	FALSE	0.522495	5.78529	-0.536936	5.71511	-2.71006	0.00968423	0.283337	-2.72103	5.43618	5.91036
C19orf71	All Targets	RNA	Endogenous	1	1	38	14	11.207	1	1	100128569	FALSE	0.276862	5.21555	-0.622965	5.10757	-2.70916	0.00970643	0.283337	-2.6717	4.74048	5.36453
GDF7	All Targets	RNA	Endogenous	1	4	36	14	13.8903	1	1	151449	FALSE	0.324657	5.47241	0.517327	5.37333	2.7091	0.00970794	0.283337	-2.71159	5.69761	5.14634
RPS11	All Targets	RNA	Endogenous	1	10	397	41	47.0489	1	1	6205	FALSE	0.319375	7.12477	0.539028	7.09485	2.72037	0.00973672	0.283337	-2.76307	7.41637	6.86978
CPE	All Targets	RNA	Endogenous	1	1	45	20	13.883	1	1	1363	FALSE	0.500946	5.48415	-0.554174	5.40413	-2.7076	0.00974537	0.283337	-2.69562	5.04916	5.65262
RPL13A	All Targets	RNA	Endogenous	1	3	95	15	17.3348	1	1	23521	FALSE	0.617571	5.7673	0.516407	5.69276	2.70723	0.00975452	0.283337	-2.69875	5.97313	5.4965
NARS2	All Targets	RNA	Endogenous	1	3	43	18	15.0558	1	1	79731	FALSE	0.526254	5.58624	-0.543599	5.49592	-2.70431	0.00982753	0.284159	-2.70805	5.13438	5.749
CARD18	All Targets	RNA	Endogenous	1	2	51	25	17.6968	1	1	59082	FALSE	0.323589	5.79561	-0.5322	5.72756	-2.70429	0.00982799	0.284159	-2.71313	5.40121	5.95599
MANBAL	All Targets	RNA	Endogenous	1	2	54	27	18.0431	1	1	63905	FALSE	-0.180162	5.81452	-0.493118	5.75238	-2.70421	0.00983008	0.284159	-2.70761	5.45147	5.96302
TEF	All Targets	RNA	Endogenous	1	2	47	20	15.9096	1	1	7008	FALSE	-0.188503	5.6515	-0.553139	5.57924	-2.7019	0.00988841	0.285234	-2.69964	5.21975	5.83088
NECAB3	All Targets	RNA	Endogenous	1	1	46	18	14.8843	1	1	63941	FALSE	0.136105	5.57419	-0.562893	5.49283	-2.70148	0.00989889	0.285234	-2.71203	5.15481	5.72944
MEPCE	All Targets	RNA	Endogenous	1	20	609	67	81.564	1	1	56257	FALSE	-0.374267	7.8978	0.491021	7.87924	2.69918	0.00995725	0.285752	-2.76968	8.12761	7.70538
C9orf64	All Targets	RNA	Endogenous	1	4	48	19	17.8016	1	1	84267	FALSE	0.103708	5.79675	0.506426	5.72108	2.69787	0.00999071	0.285752	-2.75723	6.03851	5.49887
CT47B1	All Targets	RNA	Endogenous	1	12	702	72	91.3019	1	1	643311	FALSE	-0.0899673	8.05892	0.541046	8.04146	2.69766	0.00999605	0.285752	-2.74981	8.3601	7.81842
NXPH2	All Targets	RNA	Endogenous	1	1	45	14	11.781	1	1	11249	FALSE	0.581182	5.27399	-0.5903	5.16916	-2.69703	0.0100122	0.285752	-2.71248	4.82284	5.41158
SPANXN5	All Targets	RNA	Endogenous	1	1	35	14	10.6587	1	1	494197	FALSE	0.565216	5.15299	-0.566074	5.05023	-2.6962	0.0100335	0.285752	-2.71692	4.74726	5.26232
BICD1	All Targets	RNA	Endogenous	1	5	83	32	28.075	1	1	636	FALSE	-0.169513	6.40813	0.470389	6.36159	2.69531	0.0100562	0.285752	-2.76771	6.64092	6.16606
ARHGAP5	All Targets	RNA	Endogenous	1	6	114	19	20.6941	1	1	394	FALSE	0.528772	5.99702	0.503056	5.9326	2.69511	0.0100613	0.285752	-2.75384	6.23739	5.71925
APOA1	All Targets	RNA	Endogenous	1	4	56	15	13.7996	1	1	335	FALSE	0.542466	5.46971	0.580183	5.36853	2.69759	0.0100678	0.285752	-2.7412	5.74866	5.10245
EDDM13	All Targets	RNA	Endogenous	1	1	39	13	14.5175	1	1	100506374	FALSE	0.495016	5.54098	-0.57723	5.45856	-2.69436	0.0100805	0.285752	-2.7224	5.14057	5.68115
FAR1	All Targets	RNA	Endogenous	1	2	40	14	12.8323	1	1	84188	FALSE	0.15083	5.38177	-0.649982	5.27962	-2.69644	0.0100897	0.285752	-2.69987	4.86379	5.5707
DNAJC2	All Targets	RNA	Endogenous	1	4	58	18	17.8252	1	1	27000	FALSE	0.480037	5.80044	0.548862	5.72189	2.69597	0.0100911	0.285752	-2.76428	6.05444	5.4891
FBXW7	All Targets	RNA	Endogenous	1	7	39	16	15.8483	1	1	55294	FALSE	0.123612	5.64596	0.493933	5.55288	2.69291	0.0101179	0.28606	-2.77061	5.88718	5.31887
RRP15	All Targets	RNA	Endogenous	1	1	38	17	12.2131	1	1	51018	FALSE	0.165668	5.31568	-0.560012	5.22318	-2.69081	0.0101722	0.286976	-2.72187	4.83781	5.49294
ASTN2	All Targets	RNA	Endogenous	1	2	70	16	13.9848	1	1	23245	FALSE	-0.291279	5.48432	-0.542461	5.39946	-2.68988	0.0101965	0.286976	-2.71118	5.12344	5.59266
UTY	All Targets	RNA	Endogenous	1	5	40	22	18.8286	1	1	7404	FALSE	0.0691958	5.87223	0.481749	5.79486	2.68982	0.010198	0.286976	-2.80246	6.08297	5.59319
PCLO	All Targets	RNA	Endogenous	1	1	44	21	15.3124	1	1	27445	FALSE	-0.0646586	5.60823	-0.554314	5.53318	-2.68844	0.0102339	0.287537	-2.73744	5.17487	5.78399
BTG1	All Targets	RNA	Endogenous	1	10	351	35	37.0971	1	1	694	FALSE	0.0821355	6.79256	0.449339	6.75528	2.68645	0.0102859	0.287824	-2.81476	7.03456	6.55979
ORMDL2	All Targets	RNA	Endogenous	1	5	70	23	21.3037	1	1	29095	FALSE	0.148499	6.03451	0.466535	5.97022	2.68639	0.0102875	0.287824	-2.78695	6.22333	5.79304
FRMD3	All Targets	RNA	Endogenous	1	3	44	20	14.0973	1	1	257019	FALSE	-0.16261	5.49543	-0.56213	5.40548	-2.68622	0.010292	0.287824	-2.71958	5.06564	5.64336
SLC30A9	All Targets	RNA	Endogenous	1	5	48	20	18.3753	1	1	10463	FALSE	-2.15526	5.83624	0.458949	5.76226	2.68435	0.0103412	0.288706	-2.78657	6.03192	5.57349
VASH2	All Targets	RNA	Endogenous	1	3	31	13	12.382	1	1	79805	FALSE	0.102031	5.32592	0.562066	5.21784	2.68341	0.0103658	0.288706	-2.74999	5.54496	4.98885
OSGIN1	All Targets	RNA	Endogenous	1	1	61	27	18.4836	1	1	29948	FALSE	0.565842	5.85933	-0.58256	5.80267	-2.6832	0.0103715	0.288706	-2.74777	5.42844	6.06464
RPL35A	All Targets	RNA	Endogenous	1	22	373	83	74.1188	1	1	6165	FALSE	0.0228489	7.7588	0.473381	7.74031	2.6797	0.0104641	0.290415	-2.81648	8.02464	7.54128
TM2D1	All Targets	RNA	Endogenous	1	3	52	24	19.0684	1	1	83941	FALSE	-0.139346	5.89045	0.48474	5.81872	2.67917	0.0104785	0.290415	-2.81001	6.13659	5.59621
TRIM25	All Targets	RNA	Endogenous	1	5	33	18	16.2723	1	1	7706	FALSE	-0.208919	5.6849	0.478999	5.59047	2.67906	0.0104812	0.290415	-2.82375	5.85931	5.40228
MKLN1	All Targets	RNA	Endogenous	1	3	46	21	18.7063	1	1	4289	FALSE	-0.454984	5.86166	-0.522771	5.7988	-2.67752	0.0105224	0.29111	-2.76217	5.46878	6.02982
STYXL2	All Targets	RNA	Endogenous	1	1	48	17	13.2449	1	1	92235	FALSE	0.538893	5.43236	-0.55523	5.34984	-2.67676	0.0105429	0.291228	-2.76374	5.00881	5.58856
FBXO11	All Targets	RNA	Endogenous	1	1	85	21	17.3247	1	1	80204	FALSE	-0.640516	5.77267	-0.523434	5.71304	-2.67577	0.0105693	0.291513	-2.74882	5.39025	5.93899
SAMD1	All Targets	RNA	Endogenous	1	3	80	44	30.5393	1	1	90378	FALSE	0.415296	6.52712	-0.493909	6.48899	-2.67341	0.0106329	0.292072	-2.79558	6.20837	6.68543
NUDT19	All Targets	RNA	Endogenous	1	2	42	21	15.1286	1	1	390916	FALSE	-0.121334	5.58709	-0.537843	5.50143	-2.67328	0.0106364	0.292072	-2.77094	5.18268	5.72456
F11	All Targets	RNA	Endogenous	1	1	35	16	11.8921	1	1	2160	FALSE	0.149966	5.29114	-0.568806	5.20277	-2.67322	0.0106382	0.292072	-2.76511	4.86326	5.44043
SPRR4	All Targets	RNA	Endogenous	1	2	26	9	8.67414	1	1	163778	FALSE	0.829771	4.89359	-0.608056	4.74904	-2.67185	0.0106753	0.292307	-2.74391	4.48505	4.93383
SLC14A1	All Targets	RNA	Endogenous	1	5	46	14	15.9953	1	1	6563	FALSE	0.329957	5.65788	0.528645	5.5664	2.67081	0.0107036	0.292307	-2.81905	5.90045	5.33257
LY6L	All Targets	RNA	Endogenous	1	2	30	8	9.9581	1	1	101928108	FALSE	-0.150013	5.06497	-0.607894	4.92472	-2.67068	0.010707	0.292307	-2.74084	4.57154	5.17195
ARPIN	All Targets	RNA	Endogenous	1	4	50	22	17.8229	1	1	348110	FALSE	0.163568	5.79793	0.489881	5.72397	2.66879	0.0107585	0.292307	-2.81575	6.02468	5.51347
CUL9	All Targets	RNA	Endogenous	1	2	33	14	11.3594	1	1	23113	FALSE	0.482473	5.21701	-0.583024	5.11162	-2.66856	0.0107649	0.292307	-2.75869	4.76552	5.35389
CD164	All Targets	RNA	Endogenous	1	7	91	28	23.9381	1	1	8763	FALSE	-0.644813	6.19089	0.447589	6.13588	2.66774	0.0107871	0.292307	-2.83488	6.40755	5.94571
DNAJC27	All Targets	RNA	Endogenous	1	2	40	17	11.0839	1	1	51277	FALSE	-0.462406	5.18805	-0.593303	5.08342	-2.66716	0.0108032	0.292307	-2.75493	4.73113	5.33002
OR8D4	All Targets	RNA	Endogenous	1	2	42	19	12.2711	1	1	338662	FALSE	0.178046	5.31395	-0.534622	5.22246	-2.66641	0.0108238	0.292307	-2.76742	4.92013	5.4341
RPS6	All Targets	RNA	Endogenous	1	21	802	69	95.0998	1	1	6194	FALSE	0.188997	8.1131	0.457003	8.09851	2.66633	0.0108258	0.292307	-2.83017	8.37778	7.90303
DOCK3	All Targets	RNA	Endogenous	1	1	36	20	12.5668	1	1	1795	FALSE	0.657356	5.36001	-0.565756	5.26258	-2.66632	0.0108261	0.292307	-2.76857	4.85518	5.54775
RALGDS	All Targets	RNA	Endogenous	1	5	81	24	22.6307	1	1	5900	FALSE	0.0290012	6.11533	-0.489265	6.05987	-2.66586	0.0108388	0.292307	-2.80089	5.77616	6.25846
CUL1	All Targets	RNA	Endogenous	1	1	58	23	17.1411	1	1	8454	FALSE	0.152835	5.76091	-0.499022	5.69828	-2.66568	0.0108438	0.292307	-2.79201	5.38363	5.91853
CYP4F3	All Targets	RNA	Endogenous	1	2	49	21	16.7346	1	1	4051	FALSE	0.464322	5.71862	-0.537814	5.64744	-2.66411	0.010887	0.292307	-2.78849	5.30401	5.88784
SLC25A24	All Targets	RNA	Endogenous	1	1	41	16	11.8095	1	1	29957	FALSE	-0.537697	5.28119	-0.538667	5.19666	-2.66403	0.0108891	0.292307	-2.77947	4.87679	5.42058
SHC3	All Targets	RNA	Endogenous	1	1	32	15	10.9471	1	1	53358	FALSE	0.404984	5.19293	-0.571638	5.0721	-2.66397	0.010891	0.292307	-2.77658	4.70709	5.32761
ANKRD13D	All Targets	RNA	Endogenous	1	11	81	32	29.1282	1	1	338692	FALSE	-0.730421	6.45757	0.427059	6.40916	2.66342	0.010906	0.292307	-2.88105	6.67171	6.22537
WAS	All Targets	RNA	Endogenous	1	2	45	21	15.9196	1	1	7454	FALSE	0.348299	5.65324	-0.555198	5.57615	-2.66193	0.0109473	0.292978	-2.7928	5.23784	5.81297
MYH9	All Targets	RNA	Endogenous	1	9	208	43	38.3301	1	1	4627	FALSE	-0.24721	6.83645	0.45176	6.80289	2.66045	0.0109886	0.293647	-2.86284	7.07367	6.61335
XRN2	All Targets	RNA	Endogenous	1	3	77	25	21.3294	1	1	22803	FALSE	-0.379515	6.04078	0.445443	5.97828	2.65602	0.0111126	0.295883	-2.85499	6.24922	5.78862
CHRM4	All Targets	RNA	Endogenous	1	1	43	19	14.3597	1	1	1132	FALSE	0.79202	5.53157	-0.768119	5.44704	-2.7412	0.0111211	0.295883	-2.75175	5.0269	5.74113
G6PC3	All Targets	RNA	Endogenous	1	1	55	15	11.0605	1	1	92579	FALSE	0.536663	5.20506	-0.59714	5.11365	-2.65544	0.0111288	0.295883	-2.78877	4.76423	5.35824
MGP	All Targets	RNA	Endogenous	1	8	94	27	24.3879	1	1	4256	FALSE	1.0548	6.22166	0.66522	6.16179	2.73668	0.0111378	0.295883	-2.81256	6.55312	5.88785
S100A6	All Targets	RNA	Endogenous	1	22	1305	60	101.152	1	1	6277	FALSE	0.208322	8.20319	0.484496	8.18849	2.65144	0.011242	0.298095	-2.86531	8.46078	7.99788
NDE1	All Targets	RNA	Endogenous	1	2	59	24	20.0195	1	1	54820	FALSE	0.141546	5.95531	-0.506813	5.89442	-2.651	0.0112547	0.298095	-2.83398	5.59001	6.10751
MASP2	All Targets	RNA	Endogenous	1	4	55	17	16.207	1	1	10747	FALSE	-0.224078	5.67296	0.495302	5.59018	2.64995	0.0112846	0.298095	-2.83882	5.89254	5.37852
TERF2	All Targets	RNA	Endogenous	1	6	38	15	16.6436	1	1	7014	FALSE	0.128973	5.70965	0.511947	5.62249	2.64911	0.0113085	0.298095	-2.87028	5.93957	5.40053
BPNT1	All Targets	RNA	Endogenous	1	6	46	18	15.651	1	1	10380	FALSE	0.273699	5.63314	0.508354	5.53726	2.64862	0.0113226	0.298095	-2.8737	5.84809	5.31967
XKR6	All Targets	RNA	Endogenous	1	6	83	30	25.0345	1	1	286046	FALSE	-0.0861946	6.25599	0.482789	6.20155	2.648	0.0113402	0.298095	-2.88315	6.4833	6.00432
ZNF260	All Targets	RNA	Endogenous	1	1	52	13	11.5669	1	1	339324	FALSE	1.06565	5.26147	-0.638689	5.17061	-2.65362	0.0113475	0.298095	-2.80156	4.82305	5.4139
DIAPH3	All Targets	RNA	Endogenous	1	1	35	18	12.3135	1	1	81624	FALSE	0.537982	5.3276	-0.528235	5.23356	-2.64755	0.0113533	0.298095	-2.81414	4.88001	5.48105
CCL24	All Targets	RNA	Endogenous	1	5	117	34	30.2928	1	1	6369	FALSE	0.0213175	6.51851	-0.524106	6.4699	-2.64604	0.0113966	0.298519	-2.86426	6.15978	6.68698
DDX21	All Targets	RNA	Endogenous	1	2	69	18	19.1778	1	1	9188	FALSE	0.28039	5.90068	-0.492524	5.83835	-2.64441	0.0114436	0.298519	-2.85065	5.55777	6.03475
MUC2	All Targets	RNA	Endogenous	1	3	40	20	14.0909	1	1	4583	FALSE	-0.199513	5.50034	-0.57081	5.40114	-2.64424	0.0114487	0.298519	-2.8236	5.06008	5.63988
PLEKHD1	All Targets	RNA	Endogenous	1	3	48	24	18.2348	1	1	400224	FALSE	0.137346	5.8381	0.507309	5.75653	2.64371	0.0114639	0.298519	-2.88075	6.10735	5.51095
NDUFV1	All Targets	RNA	Endogenous	1	8	73	25	24.3425	1	1	4723	FALSE	-0.270128	6.21289	0.431965	6.15784	2.64368	0.0114649	0.298519	-2.89626	6.40597	5.98415
GCDH	All Targets	RNA	Endogenous	1	6	80	22	21.6369	1	1	2639	FALSE	-0.498602	6.05677	0.468491	5.99255	2.64354	0.0114688	0.298519	-2.89914	6.29083	5.78376
TRDC	All Targets	RNA	Endogenous	1	1	38	14	12.4376	1	1	28526	FALSE	0.234759	5.34326	-0.533287	5.24352	-2.64172	0.0115217	0.29911	-2.83492	4.9512	5.44814
VPS8	All Targets	RNA	Endogenous	1	3	38	17	14.1682	1	1	23355	FALSE	0.144283	5.49719	0.506696	5.40393	2.64155	0.0115266	0.29911	-2.85483	5.69864	5.19764
PGK1	All Targets	RNA	Endogenous	1	7	131	33	34.7295	1	1	5230	FALSE	0.080175	6.70018	0.476188	6.65999	2.64105	0.0115412	0.29911	-2.92167	6.92018	6.47786
PTS	All Targets	RNA	Endogenous	1	2	38	23	12.7551	1	1	5805	FALSE	0.119408	5.36768	-0.553808	5.27983	-2.64026	0.0115643	0.299279	-2.82825	4.93827	5.51893
LCTL	All Targets	RNA	Endogenous	1	1	42	13	11.4834	1	1	197021	FALSE	0.356896	5.23946	-0.554144	5.13598	-2.63923	0.0115945	0.299388	-2.81758	4.85551	5.33232
CCKAR	All Targets	RNA	Endogenous	1	1	45	21	13.3516	1	1	886	FALSE	0.384641	5.44574	-0.587779	5.35801	-2.63898	0.0116017	0.299388	-2.82832	5.00124	5.60776
MAT2B	All Targets	RNA	Endogenous	1	4	44	18	15.9928	1	1	27430	FALSE	-0.146431	5.65462	0.481917	5.56965	2.63801	0.0116302	0.299693	-2.8821	5.87388	5.35668
PAK4	All Targets	RNA	Endogenous	1	2	51	20	15.7028	1	1	10298	FALSE	-1.25978	5.63258	-0.524708	5.56011	-2.63462	0.0117299	0.301027	-2.84088	5.22277	5.79625
ATP6V1B2	All Targets	RNA	Endogenous	1	8	69	25	22.5267	1	1	526	FALSE	-0.980161	6.10825	0.419491	6.04705	2.63404	0.0117472	0.301027	-2.92281	6.29192	5.87564
ZNF507	All Targets	RNA	Endogenous	1	2	53	15	16.6097	1	1	22847	FALSE	0.116885	5.71327	0.500507	5.63164	2.63253	0.011792	0.301027	-2.88925	5.96452	5.39863
MIR9-1HG	All Targets	RNA	Endogenous	1	1	31	14	10.709	1	1	10485	FALSE	0.326461	5.16713	-0.557351	5.04316	-2.63228	0.0117993	0.301027	-2.84204	4.69268	5.2885
PXDC1	All Targets	RNA	Endogenous	1	2	57	18	15.926	1	1	221749	FALSE	-0.197311	5.65421	-0.529588	5.58245	-2.63213	0.011804	0.301027	-2.84863	5.24746	5.81695
ARAP2	All Targets	RNA	Endogenous	1	4	59	19	16.5952	1	1	116984	FALSE	0.375135	5.70672	-0.562691	5.62733	-2.63205	0.0118061	0.301027	-2.84527	5.28835	5.86462
ANKRD46	All Targets	RNA	Endogenous	1	8	57	23	21.2573	1	1	157567	FALSE	0.0166224	6.03085	0.444306	5.96468	2.63193	0.0118097	0.301027	-2.92409	6.21822	5.7872
NFYB	All Targets	RNA	Endogenous	1	1	47	23	15.3069	1	1	4801	FALSE	-0.122563	5.60735	-0.53071	5.53758	-2.63174	0.0118154	0.301027	-2.8565	5.19774	5.77546
SEPHS2	All Targets	RNA	Endogenous	1	1	48	19	15.3415	1	1	22928	FALSE	-0.683483	5.60855	-0.513494	5.53794	-2.63038	0.0118561	0.301636	-2.85677	5.22114	5.7597
NEUROG1	All Targets	RNA	Endogenous	1	1	33	12	10.1923	1	1	4762	FALSE	-0.299302	5.09908	-0.548763	4.98718	-2.62974	0.011875	0.301691	-2.84666	4.64345	5.22778
SNX27	All Targets	RNA	Endogenous	1	2	55	19	16.1937	1	1	81609	FALSE	0.740624	5.68103	0.568057	5.59634	2.6411	0.0119162	0.301963	-2.89511	5.967	5.33688
GM2A	All Targets	RNA	Endogenous	1	8	84	26	24.2401	1	1	2760	FALSE	-0.916151	6.20838	0.450591	6.1524	2.62827	0.0119191	0.301963	-2.92817	6.41984	5.9652
MGME1	All Targets	RNA	Endogenous	1	1	44	16	14.9781	1	1	92667	FALSE	0.137043	5.58394	-0.529489	5.50388	-2.62712	0.0119538	0.302416	-2.86349	5.16993	5.73765
HAO1	All Targets	RNA	Endogenous	1	1	42	20	13.3338	1	1	54363	FALSE	0.462595	5.43703	-0.544865	5.34874	-2.62592	0.0119899	0.302903	-2.85814	4.98047	5.60654
LAMP5	All Targets	RNA	Endogenous	1	1	45	25	16.5112	1	1	24141	FALSE	-0.170095	5.71418	-0.485008	5.64436	-2.62522	0.0120109	0.303011	-2.90041	5.34181	5.85614
GRWD1	All Targets	RNA	Endogenous	1	1	52	14	12.2981	1	1	83743	FALSE	-0.0282158	5.32719	-0.568267	5.23733	-2.6246	0.0120296	0.303059	-2.84584	4.88266	5.4856
ZBTB14	All Targets	RNA	Endogenous	1	3	37	15	13.3408	1	1	7541	FALSE	-0.083808	5.41865	0.479254	5.31897	2.62327	0.0120701	0.303655	-2.89383	5.61339	5.11288
ITFG1	All Targets	RNA	Endogenous	1	2	57	29	17.1779	1	1	81533	FALSE	0.482015	5.75366	-0.558581	5.68919	-2.62162	0.0121202	0.30395	-2.87148	5.33383	5.93794
SLC22A12	All Targets	RNA	Endogenous	1	1	24	9	7.84418	1	1	116085	FALSE	0.709336	4.78651	-0.624654	4.61673	-2.6214	0.0121271	0.30395	-2.83443	4.22812	4.88876
H2BC6	All Targets	RNA	Endogenous	1	2	44	22	15.6978	1	1	8344	FALSE	-0.767733	5.63452	-0.504544	5.56342	-2.62122	0.0121324	0.30395	-2.88034	5.23895	5.79055
KMT5A	All Targets	RNA	Endogenous	1	1	43	19	12.7679	1	1	387893	FALSE	0.279686	5.37625	-0.594695	5.28304	-2.62183	0.0121628	0.304288	-2.87155	4.87652	5.5676
KRTAP12-3	All Targets	RNA	Endogenous	1	2	40	19	12.7042	1	1	386683	FALSE	0.315329	5.36024	-0.54516	5.26285	-2.6186	0.0122127	0.304997	-2.87232	4.92904	5.49651
ANKH	All Targets	RNA	Endogenous	1	5	76	27	24.3747	1	1	56172	FALSE	-0.348198	6.21618	0.464679	6.16161	2.6182	0.0122249	0.304997	-2.93352	6.42913	5.97436
RSRC1	All Targets	RNA	Endogenous	1	2	39	19	14.6491	1	1	51319	FALSE	-0.354744	5.5472	-0.502241	5.4596	-2.61615	0.0122879	0.305817	-2.8921	5.14683	5.67854
GEM	All Targets	RNA	Endogenous	1	2	103	23	17.5275	1	1	2669	FALSE	-0.0628863	5.78185	0.537102	5.70932	2.61742	0.0122948	0.305817	-2.92329	6.02534	5.4881
PREX1	All Targets	RNA	Endogenous	1	2	75	16	15.4934	1	1	57580	FALSE	-0.612218	5.61901	-0.53435	5.54913	-2.61528	0.0123149	0.305817	-2.88106	5.27682	5.73975
SLC7A3	All Targets	RNA	Endogenous	1	2	49	23	15.2968	1	1	84889	FALSE	-0.690092	5.60553	-0.58528	5.52734	-2.61493	0.0123256	0.305817	-2.88522	5.11003	5.81945
PRRT1	All Targets	RNA	Endogenous	1	3	39	19	14.4697	1	1	80863	FALSE	-0.129597	5.52554	-0.488392	5.43785	-2.61269	0.0123954	0.307071	-2.89545	5.13937	5.64679
MYC	All Targets	RNA	Endogenous	1	4	167	27	26.6627	1	1	4609	FALSE	0.359064	6.34078	-0.580563	6.29339	-2.62204	0.0124102	0.307071	-2.91255	5.9597	6.52697
CALCOCO2	All Targets	RNA	Endogenous	1	4	78	29	22.9201	1	1	10241	FALSE	-0.000565	6.13281	-0.487155	6.08049	-2.60962	0.0124909	0.308646	-2.91622	5.80469	6.27355
MGLL	All Targets	RNA	Endogenous	1	2	39	19	13.1658	1	1	11343	FALSE	0.0954049	5.40946	-0.545492	5.31307	-2.60888	0.0125144	0.308802	-2.88858	4.93026	5.58104
ASB5	All Targets	RNA	Endogenous	1	1	41	20	14.4087	1	1	140458	FALSE	0.267767	5.5294	-0.529561	5.45344	-2.60693	0.0125756	0.30989	-2.90813	5.11143	5.69284
NSUN6	All Targets	RNA	Endogenous	1	4	38	16	16.2054	1	1	221078	FALSE	0.263988	5.67521	0.495212	5.58695	2.60486	0.0126411	0.310691	-2.96015	5.88501	5.3783
SPINK6	All Targets	RNA	Endogenous	1	1	39	16	10.6992	1	1	404203	FALSE	0.46627	5.16297	-0.554211	5.06638	-2.60481	0.0126426	0.310691	-2.90126	4.72251	5.30708
ALG5	All Targets	RNA	Endogenous	1	3	57	23	17.7707	1	1	29880	FALSE	0.466243	5.79831	0.531657	5.72464	2.60371	0.0126776	0.311128	-2.93816	6.05365	5.49433
AIF1L	All Targets	RNA	Endogenous	1	2	45	22	14.5877	1	1	83543	FALSE	0.199683	5.53786	-0.498607	5.45568	-2.60162	0.0127439	0.311386	-2.91552	5.14153	5.67558
KRT1	All Targets	RNA	Endogenous	1	1	41	17	11.3605	1	1	3848	FALSE	0.847636	5.25953	-0.619343	5.13669	-2.60462	0.012757	0.311386	-2.90119	4.74634	5.40993
EBLN2	All Targets	RNA	Endogenous	1	1	42	21	14.8359	1	1	55096	FALSE	-1.18289	5.56705	-0.495875	5.48584	-2.60105	0.0127622	0.311386	-2.932	5.19901	5.68662
WDR38	All Targets	RNA	Endogenous	1	1	39	23	13.8488	1	1	401551	FALSE	0.0251484	5.48312	-0.512499	5.40208	-2.60072	0.0127728	0.311386	-2.92946	5.0366	5.65793
OR52K1	All Targets	RNA	Endogenous	1	1	47	17	12.5959	1	1	390036	FALSE	0.326904	5.36256	-0.599796	5.27292	-2.60041	0.0127827	0.311386	-2.90388	4.81225	5.5954
CFAP70	All Targets	RNA	Endogenous	1	1	45	14	11.5377	1	1	118491	FALSE	0.821735	5.25182	-0.564659	5.15074	-2.59964	0.0128074	0.311386	-2.915	4.83932	5.36873
PITPNM3	All Targets	RNA	Endogenous	1	1	42	18	13.3955	1	1	83394	FALSE	0.0149773	5.43507	-0.559098	5.34718	-2.59959	0.012809	0.311386	-2.91791	4.96859	5.61219
TAF1C	All Targets	RNA	Endogenous	1	1	40	15	10.5675	1	1	9013	FALSE	-0.0341435	5.13464	-0.540011	5.02649	-2.59833	0.0128494	0.311682	-2.89638	4.67461	5.27281
CDC14B	All Targets	RNA	Endogenous	1	1	56	17	13.0264	1	1	8555	FALSE	0.957613	5.41979	-0.543601	5.33275	-2.59795	0.0128615	0.311682	-2.9237	4.98412	5.57679
ZNF709	All Targets	RNA	Endogenous	1	2	45	23	14.4269	1	1	163051	FALSE	0.282462	5.52774	-0.543094	5.45109	-2.59714	0.0128878	0.311682	-2.9176	5.08021	5.7107
TFE3	All Targets	RNA	Endogenous	1	5	47	21	18.4657	1	1	7030	FALSE	0.00619114	5.84568	0.452443	5.76771	2.59706	0.0128903	0.311682	-2.98503	6.02154	5.59003
PPP1R17	All Targets	RNA	Endogenous	1	1	48	15	13.507	1	1	10842	FALSE	0.404249	5.45506	-0.556192	5.36393	-2.5939	0.0129925	0.312363	-2.94396	5.02492	5.60125
APMAP	All Targets	RNA	Endogenous	1	36	1351	156	208.188	1	1	57136	FALSE	-0.239535	9.23127	0.502985	9.22316	2.59364	0.013001	0.312363	-2.94797	9.52828	9.00958
TET3	All Targets	RNA	Endogenous	1	12	290	51	55.4051	1	1	200424	FALSE	-0.411768	7.35161	0.450103	7.32558	2.59335	0.0130106	0.312363	-3.00316	7.58856	7.14149
ZNF563	All Targets	RNA	Endogenous	1	1	41	15	10.5788	1	1	147837	FALSE	-0.0149667	5.13974	-0.548262	5.04128	-2.59297	0.0130228	0.312363	-2.92062	4.71615	5.26887
CD200R1	All Targets	RNA	Endogenous	1	3	37	21	17.3549	1	1	131450	FALSE	-0.739584	5.767	0.498859	5.68537	2.59294	0.0130237	0.312363	-2.98692	5.97028	5.48593
MAP4K4	All Targets	RNA	Endogenous	1	7	85	25	25.5103	1	1	9448	FALSE	0.369996	6.27921	0.475422	6.22397	2.59275	0.0130301	0.312363	-3.01046	6.4816	6.04363
MESD	All Targets	RNA	Endogenous	1	4	47	18	16.1406	1	1	23184	FALSE	-0.0761829	5.66602	0.463931	5.58208	2.59193	0.0130566	0.312363	-2.97142	5.81991	5.41559
ANKRD65	All Targets	RNA	Endogenous	1	4	51	29	23.2823	1	1	441869	FALSE	0.130454	6.15956	0.514477	6.09837	2.59337	0.0130592	0.312363	-2.99131	6.36619	5.91089
APOC1	All Targets	RNA	Endogenous	1	1	91	24	20.5597	1	1	341	FALSE	0.423894	6.00259	0.482079	5.94222	2.5909	0.0130903	0.312363	-3.00738	6.22881	5.74162
YIPF2	All Targets	RNA	Endogenous	1	1	37	19	13.3958	1	1	78992	FALSE	0.231401	5.4366	-0.524853	5.35055	-2.59086	0.0130916	0.312363	-2.93951	5.01069	5.58845
PHLDB1	All Targets	RNA	Endogenous	1	1	117	26	22.8244	1	1	23187	FALSE	-0.197096	6.14108	-0.507191	6.09434	-2.58991	0.0131227	0.312691	-2.96696	5.80742	6.29518
NCOA7	All Targets	RNA	Endogenous	1	2	43	19	15.4186	1	1	135112	FALSE	-0.293109	5.6113	0.458929	5.52837	2.58901	0.0131523	0.312779	-2.98558	5.80761	5.3329
FETUB	All Targets	RNA	Endogenous	1	1	33	17	11.8329	1	1	26998	FALSE	0.0253225	5.2763	-0.488963	5.18039	-2.58874	0.013161	0.312779	-2.94354	4.92053	5.36229
MLN	All Targets	RNA	Endogenous	1	1	41	15	12.6617	1	1	4295	FALSE	-0.0910843	5.36479	-0.552524	5.27109	-2.5878	0.013192	0.312939	-2.94186	4.90467	5.52759
ZFP36L2	All Targets	RNA	Endogenous	1	3	343	35	30.3985	1	1	678	FALSE	0.771564	6.53662	-0.844736	6.49129	-2.69738	0.0132025	0.312939	-2.85892	5.99539	6.83841
CLTA	All Targets	RNA	Endogenous	1	5	83	12	17.0385	1	1	1211	FALSE	0.460347	5.74515	0.543821	5.66243	2.58568	0.013262	0.313766	-2.96154	5.93007	5.47509
CRIP1	All Targets	RNA	Endogenous	1	6	54	16	18.6346	1	1	1396	FALSE	-0.105598	5.85588	0.471651	5.78371	2.58538	0.0132722	0.313766	-2.993	6.06808	5.58464
FANCB	All Targets	RNA	Endogenous	1	2	48	18	14.734	1	1	2187	FALSE	-0.61621	5.54933	-0.496912	5.46784	-2.58444	0.0133032	0.31388	-2.94365	5.17631	5.67191
CCDC88B	All Targets	RNA	Endogenous	1	5	151	40	36.0435	1	1	283234	FALSE	0.136916	6.75828	0.422253	6.71915	2.5835	0.0133346	0.31388	-3.00986	6.97407	6.5407
LACTBL1	All Targets	RNA	Endogenous	1	1	43	15	13.0128	1	1	646262	FALSE	0.245338	5.40895	-0.494819	5.33027	-2.58278	0.0133583	0.31388	-2.96614	5.00766	5.5561
C5orf63	All Targets	RNA	Endogenous	1	2	31	18	12.225	1	1	401207	FALSE	-0.242696	5.31423	-0.55076	5.21275	-2.58247	0.0133689	0.31388	-2.94909	4.89883	5.43249
C1QL2	All Targets	RNA	Endogenous	1	3	99	32	27.9802	1	1	165257	FALSE	0.0284312	6.40796	-0.487697	6.36071	-2.58136	0.0134058	0.31388	-3.01092	6.0719	6.56287
MRPS36	All Targets	RNA	Endogenous	1	2	58	21	17.7321	1	1	92259	FALSE	-0.320181	5.79141	-0.489474	5.72819	-2.58106	0.0134159	0.31388	-2.96097	5.43677	5.93218
FAM47B	All Targets	RNA	Endogenous	1	3	96	26	24.0949	1	1	170062	FALSE	-0.258011	6.2066	-0.689342	6.15701	-2.63457	0.0134193	0.31388	-2.92635	5.75101	6.4412
CPA5	All Targets	RNA	Endogenous	1	2	45	14	13.6537	1	1	93979	FALSE	0.308172	5.45564	-0.593052	5.36481	-2.58088	0.0134218	0.31388	-2.94148	4.99381	5.62452
CEP70	All Targets	RNA	Endogenous	1	3	40	18	15.0044	1	1	80321	FALSE	0.358726	5.57386	0.46417	5.48555	2.58053	0.0134336	0.31388	-2.99466	5.77401	5.28362
FOXD4L5	All Targets	RNA	Endogenous	1	1	40	18	13.0173	1	1	653427	FALSE	0.387867	5.39914	-0.56225	5.31513	-2.57989	0.0134552	0.313977	-2.95366	4.94579	5.57366
CLEC3A	All Targets	RNA	Endogenous	1	2	37	18	14.3254	1	1	10143	FALSE	-0.391054	5.52045	-0.53282	5.42406	-2.57668	0.013563	0.316084	-2.97512	5.13413	5.62702
ZNF619	All Targets	RNA	Endogenous	1	1	35	13	11.5677	1	1	285267	FALSE	-0.338201	5.2471	-0.565071	5.14961	-2.57588	0.0135902	0.316131	-2.94973	4.778	5.40974
EIF3G	All Targets	RNA	Endogenous	1	6	108	15	17.953	1	1	8666	FALSE	0.219256	5.81349	0.601469	5.73524	2.59406	0.0136035	0.316131	-2.97719	6.11362	5.47037
C20orf144	All Targets	RNA	Endogenous	1	2	40	22	15.4493	1	1	128864	FALSE	0.037459	5.61275	-0.518893	5.53567	-2.57485	0.0136249	0.316131	-2.97172	5.21581	5.75958
RPS15	All Targets	RNA	Endogenous	1	14	391	60	54.4272	1	1	6209	FALSE	0.074129	7.32583	0.4233	7.30034	2.57455	0.0136351	0.316131	-3.06356	7.57072	7.11108
TMED9	All Targets	RNA	Endogenous	1	3	107	25	19.6161	1	1	54732	FALSE	-0.0527778	5.9294	0.49613	5.86337	2.57337	0.0136754	0.316659	-3.00512	6.21431	5.61771
CLINT1	All Targets	RNA	Endogenous	1	4	44	20	18.0809	1	1	9685	FALSE	-0.0833298	5.81833	0.443517	5.74111	2.5722	0.0137151	0.317171	-3.02865	5.98071	5.57339
TRAF3IP1	All Targets	RNA	Endogenous	1	2	51	17	17.0249	1	1	26146	FALSE	0.184577	5.74966	0.506655	5.66762	2.57261	0.0137531	0.317237	-3.04093	5.99208	5.4405
RGCC	All Targets	RNA	Endogenous	1	2	111	16	17.0884	1	1	28984	FALSE	0.343134	5.75746	-0.934722	5.6812	-2.73469	0.0137662	0.317237	-2.86577	5.2113	6.01014
C8orf74	All Targets	RNA	Endogenous	1	1	47	20	15.9898	1	1	203076	FALSE	-0.624226	5.66424	-0.492136	5.59734	-2.57058	0.0137708	0.317237	-2.98852	5.29939	5.8059
NCALD	All Targets	RNA	Endogenous	1	2	44	16	16.0955	1	1	83988	FALSE	-0.544229	5.66726	-0.509322	5.59076	-2.56875	0.0138336	0.317644	-2.99486	5.29159	5.80017
IFI44L	All Targets	RNA	Endogenous	1	5	56	19	17.6611	1	1	10964	FALSE	0.00791765	5.78464	0.466771	5.70954	2.5686	0.0138386	0.317644	-3.01854	6.00333	5.50388
IFT88	All Targets	RNA	Endogenous	1	1	36	17	10.6677	1	1	8100	FALSE	0.355075	5.14698	-0.547294	5.04352	-2.56852	0.0138412	0.317644	-2.96291	4.7133	5.27468
AP3B2	All Targets	RNA	Endogenous	1	6	43	23	18.1092	1	1	8120	FALSE	0.0898482	5.82004	0.455446	5.74329	2.56745	0.0138781	0.318085	-3.03245	5.98896	5.57133
PIGM	All Targets	RNA	Endogenous	1	6	44	24	20.8564	1	1	93183	FALSE	-0.172698	6.00704	0.441035	5.93875	2.56694	0.0138958	0.318086	-3.05971	6.17323	5.77461
MACIR	All Targets	RNA	Endogenous	1	2	45	22	17.575	1	1	90355	FALSE	0.493822	5.78439	-0.504895	5.71171	-2.56553	0.0139446	0.318335	-3.00712	5.41578	5.91886
TMEM39B	All Targets	RNA	Endogenous	1	1	49	16	14.1423	1	1	55116	FALSE	0.423635	5.50432	-0.518589	5.42539	-2.56527	0.0139537	0.318335	-2.9986	5.14637	5.6207
COQ2	All Targets	RNA	Endogenous	1	1	54	20	15.0546	1	1	27235	FALSE	0.34049	5.60141	-0.469455	5.531	-2.56497	0.0139639	0.318335	-3.01967	5.26111	5.71991
SRMS	All Targets	RNA	Endogenous	1	1	42	21	15.0117	1	1	6725	FALSE	0.666798	5.59026	-0.517679	5.51228	-2.56419	0.0139909	0.318335	-3.01238	5.19983	5.731
TNFAIP1	All Targets	RNA	Endogenous	1	1	85	33	22.8147	1	1	7126	FALSE	-0.655856	6.14453	-0.462451	6.09218	-2.56408	0.0139949	0.318335	-3.03936	5.81675	6.28497
HMGA1	All Targets	RNA	Endogenous	1	5	524	25	28.4013	1	1	3159	FALSE	0.775576	6.42817	0.635008	6.37901	2.6257	0.0140767	0.319794	-3.01135	6.79131	6.09039
RPS6KA3	All Targets	RNA	Endogenous	1	5	94	20	19.5442	1	1	6197	FALSE	0.399849	5.9207	0.500523	5.8508	2.5604	0.0141236	0.320454	-3.05047	6.17241	5.62567
P2RY1	All Targets	RNA	Endogenous	1	1	59	21	16.7859	1	1	5028	FALSE	-0.355814	5.73295	-0.482932	5.65794	-2.55901	0.0141722	0.321044	-3.04161	5.37544	5.85568
ZBTB7B	All Targets	RNA	Endogenous	1	6	94	27	28.7723	1	1	51043	FALSE	-0.143057	6.44331	0.410339	6.3949	2.55864	0.0141852	0.321044	-3.08769	6.6246	6.2341
BEX4	All Targets	RNA	Endogenous	1	5	60	26	23.4838	1	1	56271	FALSE	-0.127384	6.16962	0.535446	6.10969	2.5653	0.0142231	0.321489	-3.0539	6.41606	5.89523
ARHGAP33	All Targets	RNA	Endogenous	1	1	44	17	15.0504	1	1	115703	FALSE	-0.0841946	5.59068	-0.504467	5.51551	-2.55707	0.0142405	0.321489	-3.02307	5.21916	5.72295
AGTPBP1	All Targets	RNA	Endogenous	1	2	44	18	15.4476	1	1	23287	FALSE	-0.370424	5.61603	-0.549803	5.53771	-2.55408	0.0143465	0.323392	-3.01213	5.17192	5.79376
STPG4	All Targets	RNA	Endogenous	1	1	47	13	13.662	1	1	285051	FALSE	0.0973387	5.46335	-0.530668	5.37129	-2.55369	0.0143606	0.323392	-3.02814	5.10904	5.55487
DCAF4L2	All Targets	RNA	Endogenous	1	1	34	18	12.0081	1	1	138009	FALSE	-0.867937	5.298	-0.546053	5.2023	-2.55308	0.0143821	0.323473	-3.00224	4.82364	5.46736
SPINT3	All Targets	RNA	Endogenous	1	1	50	19	15.0698	1	1	10816	FALSE	-0.565849	5.58909	-0.494516	5.51326	-2.55195	0.0144224	0.323974	-3.015	5.20224	5.73098
PSMA3	All Targets	RNA	Endogenous	1	1	52	21	14.062	1	1	5684	FALSE	0.192332	5.49959	-0.523867	5.42498	-2.55089	0.0144606	0.324102	-3.02136	5.07299	5.67138
IER2	All Targets	RNA	Endogenous	1	2	66	21	15.6952	1	1	9592	FALSE	0.360174	5.63643	-0.520774	5.56126	-2.54925	0.0145195	0.324102	-3.01408	5.20545	5.81032
GRK5	All Targets	RNA	Endogenous	1	1	49	23	16.4097	1	1	2869	FALSE	-0.0347621	5.69709	-0.475194	5.63057	-2.54885	0.0145337	0.324102	-3.03784	5.35982	5.8201
ACTA2	All Targets	RNA	Endogenous	1	4	78	19	17.8291	1	1	59	FALSE	0.157129	5.80065	0.518679	5.72933	2.54853	0.0145452	0.324102	-3.03533	5.97912	5.55448
RANBP6	All Targets	RNA	Endogenous	1	1	43	16	10.2021	1	1	26953	FALSE	0.0537602	5.099	-0.576073	4.99151	-2.54847	0.0145472	0.324102	-3.0026	4.62288	5.24956
TMPRSS11F	All Targets	RNA	Endogenous	1	1	36	22	12.7508	1	1	389208	FALSE	0.21555	5.37288	-0.563187	5.28289	-2.54837	0.014551	0.324102	-3.018	4.92591	5.53278
ZNF626	All Targets	RNA	Endogenous	1	2	43	13	13.9666	1	1	199777	FALSE	-0.268605	5.48073	-0.475904	5.3955	-2.54772	0.0145744	0.324102	-3.03328	5.14979	5.56749
LAMTOR3	All Targets	RNA	Endogenous	1	1	46	10	7.75508	1	1	8649	FALSE	0.619106	4.77216	-0.603048	4.62803	-2.54763	0.0145776	0.324102	-2.99071	4.26567	4.88169
IFI6	All Targets	RNA	Endogenous	1	5	119	25	23.1456	1	1	2537	FALSE	0.213707	6.15064	0.514218	6.09492	2.54722	0.0145926	0.324102	-3.05752	6.44092	5.85272
SLC25A6	All Targets	RNA	Endogenous	1	9	155	27	27.9092	1	1	293	FALSE	0.519756	6.40283	0.428071	6.35192	2.5468	0.0146078	0.324102	-3.09632	6.60234	6.17662
SPP2	All Targets	RNA	Endogenous	1	1	43	19	12.7576	1	1	6694	FALSE	-0.617584	5.37669	-0.510262	5.28865	-2.54472	0.0146831	0.32444	-3.01821	4.98072	5.5042
XYLT1	All Targets	RNA	Endogenous	1	2	54	26	15.478	1	1	64131	FALSE	0.243432	5.61797	-0.530905	5.54	-2.54431	0.014698	0.32444	-3.03406	5.17319	5.79677
MEF2A	All Targets	RNA	Endogenous	1	2	62	22	19.4117	1	1	4205	FALSE	-0.252099	5.91168	-0.462854	5.85304	-2.54416	0.0147032	0.32444	-3.05123	5.58096	6.0435
HGD	All Targets	RNA	Endogenous	1	1	98	23	17.5832	1	1	3081	FALSE	0.15839	5.79314	-0.643851	5.728	-2.58529	0.0147085	0.32444	-3.02125	5.35402	5.98979
ZAP70	All Targets	RNA	Endogenous	1	2	31	15	11.517	1	1	7535	FALSE	-0.146977	5.23399	-0.528675	5.13652	-2.54354	0.0147259	0.32444	-3.01927	4.7792	5.38665
NFE2	All Targets	RNA	Endogenous	1	1	45	22	14.4121	1	1	4778	FALSE	0.253728	5.53037	-0.517075	5.45218	-2.5434	0.0147309	0.32444	-3.04631	5.13219	5.67617
KDM1B	All Targets	RNA	Endogenous	1	4	45	14	15.0248	1	1	221656	FALSE	0.0143534	5.57919	0.453499	5.48032	2.54135	0.014806	0.325514	-3.08505	5.76171	5.28335
USP5	All Targets	RNA	Endogenous	1	3	45	19	16.6102	1	1	8078	FALSE	0.0337602	5.70536	0.458333	5.62721	2.54066	0.0148311	0.325514	-3.08829	5.9192	5.42283
CEMIP	All Targets	RNA	Endogenous	1	5	36	13	13.9074	1	1	57214	FALSE	-0.175882	5.47272	0.488499	5.37326	2.54024	0.0148466	0.325514	-3.06296	5.6843	5.15553
IL10RA	All Targets	RNA	Endogenous	1	2	52	20	16.7317	1	1	3587	FALSE	0.00176888	5.72086	-0.535286	5.64821	-2.53951	0.0148733	0.325514	-3.0402	5.29257	5.89716
HSPB2	All Targets	RNA	Endogenous	1	2	65	20	16.5091	1	1	3316	FALSE	0.811756	5.70055	-0.516166	5.63121	-2.5392	0.0148847	0.325514	-3.04236	5.33708	5.8371
SFXN3	All Targets	RNA	Endogenous	1	4	49	12	14.5641	1	1	81855	FALSE	-0.0842018	5.53677	0.513609	5.44038	2.53911	0.014888	0.325514	-3.06727	5.71424	5.24867
COX5B	All Targets	RNA	Endogenous	1	2	85	29	23.3431	1	1	1329	FALSE	-0.208111	6.16448	-0.466777	6.1127	-2.53802	0.0149284	0.325758	-3.0696	5.84396	6.30081
ADH4	All Targets	RNA	Endogenous	1	1	26	12	7.06409	1	1	127	FALSE	-0.14868	4.66305	-0.611422	4.5063	-2.53783	0.0149352	0.325758	-3.01223	4.11767	4.77833
ZXDB	All Targets	RNA	Endogenous	1	2	48	20	15.3286	1	1	158586	FALSE	-0.00275792	5.60756	-0.49926	5.52737	-2.53619	0.0149958	0.326293	-3.06611	5.2048	5.75317
AGO1	All Targets	RNA	Endogenous	1	3	62	22	19.6576	1	1	26523	FALSE	0.068512	5.93561	0.490979	5.8659	2.53619	0.014996	0.326293	-3.09584	6.19528	5.63533
UBA2	All Targets	RNA	Endogenous	1	4	39	17	17.1867	1	1	10054	FALSE	-0.0025146	5.75182	0.443396	5.66873	2.53544	0.0150237	0.326503	-3.11498	5.93144	5.48484
C14orf180	All Targets	RNA	Endogenous	1	1	38	15	11.2757	1	1	400258	FALSE	0.250076	5.21002	-0.517473	5.1106	-2.5339	0.015081	0.327239	-3.03912	4.82879	5.30787
VCL	All Targets	RNA	Endogenous	1	3	68	17	19.0102	1	1	7414	FALSE	0.577333	5.88924	0.515313	5.82054	2.53355	0.0150939	0.327239	-3.09157	6.15964	5.58316
SERINC5	All Targets	RNA	Endogenous	1	4	94	17	18.0409	1	1	256987	FALSE	0.126919	5.81845	0.512646	5.74254	2.53165	0.015165	0.328386	-3.09155	6.07038	5.51306
HNRNPUL1	All Targets	RNA	Endogenous	1	5	83	31	25.5655	1	1	11100	FALSE	0.0455779	6.28007	0.431672	6.22853	2.53092	0.0151921	0.32858	-3.12433	6.48613	6.0482
MED13	All Targets	RNA	Endogenous	1	8	53	25	22.8534	1	1	9969	FALSE	-0.441591	6.12975	0.414481	6.06664	2.52987	0.0152316	0.32904	-3.15458	6.31993	5.88935
CDS1	All Targets	RNA	Endogenous	1	1	44	21	12.5159	1	1	1040	FALSE	0.151683	5.34839	-0.506245	5.26061	-2.52872	0.0152746	0.329574	-3.05875	4.95676	5.47331
SEM1	All Targets	RNA	Endogenous	1	7	94	26	22.8279	1	1	7979	FALSE	-0.210483	6.12658	0.429097	6.06689	2.52733	0.0153272	0.329827	-3.13461	6.32151	5.88865
IGSF3	All Targets	RNA	Endogenous	1	1	38	16	12.7209	1	1	3321	FALSE	-0.0563649	5.36922	-0.48281	5.28195	-2.52697	0.0153407	0.329827	-3.07388	4.97157	5.49921
ITGBL1	All Targets	RNA	Endogenous	1	2	43	19	13.6692	1	1	9358	FALSE	0.0416199	5.45338	-0.486745	5.36967	-2.52696	0.0153412	0.329827	-3.06913	5.05029	5.59324
RPS27	All Targets	RNA	Endogenous	1	19	509	58	63.1032	1	1	6232	FALSE	-0.0980609	7.53456	0.454565	7.51207	2.52565	0.015391	0.330341	-3.16445	7.79194	7.31615
OR8K3	All Targets	RNA	Endogenous	1	2	47	16	12.9855	1	1	219473	FALSE	0.282249	5.39352	-0.620638	5.30038	-2.52851	0.0154018	0.330341	-3.04404	4.89234	5.58601
OR5F1	All Targets	RNA	Endogenous	1	6	49	22	18.3986	1	1	338674	FALSE	-0.448757	5.83905	0.44339	5.76496	2.5239	0.0154574	0.331141	-3.1331	6.04464	5.56919
PPIA	All Targets	RNA	Endogenous	1	5	255	21	24.6562	1	1	5478	FALSE	0.370055	6.24589	0.498724	6.18881	2.52333	0.015479	0.33121	-3.08516	6.49474	5.97465
PCOLCE	All Targets	RNA	Endogenous	1	3	59	17	16.5597	1	1	5118	FALSE	0.0283778	5.70194	-0.518715	5.63001	-2.52176	0.0155391	0.331603	-3.07302	5.33936	5.83347
YKT6	All Targets	RNA	Endogenous	1	3	71	19	18.2069	1	1	10652	FALSE	-0.0813655	5.83222	0.557031	5.75764	2.52923	0.0155784	0.331603	-3.10509	6.10074	5.51746
TCP11L2	All Targets	RNA	Endogenous	1	2	38	23	14.1125	1	1	255394	FALSE	-0.177171	5.50379	-0.514251	5.41374	-2.52063	0.0155823	0.331603	-3.0694	5.1083	5.62756
FGD1	All Targets	RNA	Endogenous	1	3	44	21	15.719	1	1	2245	FALSE	-0.890906	5.63373	-0.518114	5.55578	-2.52046	0.0155888	0.331603	-3.07611	5.22516	5.7872
TIMM22	All Targets	RNA	Endogenous	1	1	49	20	14.2994	1	1	29928	FALSE	-0.218061	5.52266	-0.48826	5.44856	-2.52045	0.0155893	0.331603	-3.08832	5.15623	5.65318
TFEC	All Targets	RNA	Endogenous	1	1	50	22	13.807	1	1	22797	FALSE	0.0825931	5.4776	-0.528597	5.40053	-2.51929	0.0156336	0.332155	-3.08133	5.03434	5.65686
CCDC130	All Targets	RNA	Endogenous	1	3	47	15	13.0321	1	1	81576	FALSE	0.0781122	5.39546	-0.544312	5.29622	-2.51772	0.0156942	0.332343	-3.06535	4.99768	5.5052
CCDC183	All Targets	RNA	Endogenous	1	1	45	13	11.9117	1	1	84960	FALSE	0.25006	5.28321	-0.495732	5.18986	-2.51742	0.0157058	0.332343	-3.0877	4.92909	5.3724
BCO1	All Targets	RNA	Endogenous	1	2	46	14	12.2122	1	1	53630	FALSE	0.199753	5.30938	-0.52857	5.2155	-2.51639	0.0157457	0.332343	-3.06986	4.91465	5.4261
PPARG	All Targets	RNA	Endogenous	1	1	37	16	13.6134	1	1	5468	FALSE	0.235513	5.45727	-0.513746	5.36804	-2.51635	0.0157472	0.332343	-3.08615	5.05547	5.58683
PELI1	All Targets	RNA	Endogenous	1	1	72	17	13.5377	1	1	57162	FALSE	0.687171	5.45896	-0.64779	5.37383	-2.53569	0.0157553	0.332343	-3.05976	5.00786	5.63001
VCAN	All Targets	RNA	Endogenous	1	4	71	20	15.5436	1	1	1462	FALSE	-0.587022	5.61844	0.502606	5.53628	2.51541	0.0157837	0.332343	-3.09801	5.8019	5.35035
DAOA	All Targets	RNA	Endogenous	1	2	48	25	21.5988	1	1	267012	FALSE	0.187561	6.06232	0.454021	5.99799	2.51494	0.0158017	0.332343	-3.1646	6.28613	5.7963
MYOT	All Targets	RNA	Endogenous	1	3	91	34	26.742	1	1	9499	FALSE	-0.441533	6.34234	-0.444493	6.29829	-2.51478	0.0158083	0.332343	-3.13948	6.03872	6.47999
CHADL	All Targets	RNA	Endogenous	1	1	49	19	14.3639	1	1	150356	FALSE	0.228276	5.5226	-0.498074	5.44668	-2.51462	0.0158144	0.332343	-3.09717	5.16056	5.64697
BCL2L10	All Targets	RNA	Endogenous	1	1	40	18	14.4442	1	1	10017	FALSE	-0.270184	5.53569	-0.495974	5.46253	-2.5138	0.0158461	0.332343	-3.10771	5.12582	5.69822
MAPK10	All Targets	RNA	Endogenous	1	1	50	16	15.1114	1	1	5602	FALSE	-0.340193	5.58946	-0.493165	5.51495	-2.5138	0.0158464	0.332343	-3.10626	5.24603	5.7032
RPL37A	All Targets	RNA	Endogenous	1	21	1035	109	123.563	1	1	6168	FALSE	0.287865	8.48494	0.4892	8.47368	2.51335	0.0158636	0.332343	-3.13487	8.77827	8.26047
SIGMAR1	All Targets	RNA	Endogenous	1	8	143	29	31.0563	1	1	10280	FALSE	-0.000132001	6.5483	0.455877	6.50279	2.51115	0.0159497	0.333274	-3.1881	6.77281	6.31377
SLC1A3	All Targets	RNA	Endogenous	1	1	71	19	14.1876	1	1	6507	FALSE	0.628511	5.52564	-0.698934	5.43204	-2.56985	0.0159597	0.333274	-3.05947	4.98318	5.74625
KCNH3	All Targets	RNA	Endogenous	1	5	47	23	21.4246	1	1	23416	FALSE	-0.900005	6.04729	0.456312	5.97721	2.51058	0.0159719	0.333274	-3.17114	6.27956	5.76557
PABPC1	All Targets	RNA	Endogenous	1	20	401	51	64.768	1	1	26986	FALSE	0.312347	7.57104	0.465894	7.54839	2.51015	0.015989	0.333274	-3.18836	7.79061	7.37883
ARR3	All Targets	RNA	Endogenous	1	1	39	17	14.4704	1	1	407	FALSE	0.434607	5.53624	-0.543877	5.4525	-2.50986	0.0160004	0.333274	-3.1085	5.10244	5.69755
FAM3C	All Targets	RNA	Endogenous	1	9	201	40	39.2839	1	1	10447	FALSE	-0.143053	6.87371	0.418266	6.83817	2.50707	0.0161104	0.334403	-3.18952	7.08693	6.66404
DKK3	All Targets	RNA	Endogenous	1	11	106	37	38.5806	1	1	27122	FALSE	0.523599	6.84563	0.472275	6.80865	2.50996	0.0161181	0.334403	-3.21394	7.06204	6.63128
GPR19	All Targets	RNA	Endogenous	1	1	53	17	14.936	1	1	2842	FALSE	-0.537083	5.58006	-0.501907	5.49927	-2.50644	0.0161353	0.334403	-3.11188	5.18306	5.72062
MXD4	All Targets	RNA	Endogenous	1	3	61	25	21.8686	1	1	10608	FALSE	-0.218931	6.06996	-0.468242	6.01484	-2.50636	0.0161385	0.334403	-3.14045	5.7333	6.21191
MTO1	All Targets	RNA	Endogenous	1	1	44	17	14.8755	1	1	25821	FALSE	0.197877	5.57459	-0.511641	5.49151	-2.50514	0.0161866	0.334403	-3.12322	5.18363	5.70703
CYTIP	All Targets	RNA	Endogenous	1	6	61	18	18.7839	1	1	9595	FALSE	-0.344734	5.86656	0.438453	5.79472	2.50509	0.0161887	0.334403	-3.1697	6.07098	5.60133
ITPRID1	All Targets	RNA	Endogenous	1	7	39	20	18.0789	1	1	223075	FALSE	-0.532988	5.81783	0.446649	5.73764	2.50476	0.016202	0.334403	-3.1787	5.97871	5.56888
HORMAD1	All Targets	RNA	Endogenous	1	1	47	18	13.1924	1	1	84072	FALSE	0.333941	5.42896	-0.535712	5.34518	-2.50457	0.0162095	0.334403	-3.12602	4.98519	5.59718
TNC	All Targets	RNA	Endogenous	1	4	147	16	15.683	1	1	3371	FALSE	0.489501	5.63273	0.548792	5.54805	2.50579	0.0162271	0.334403	-3.12873	5.90603	5.29747
SNRNP48	All Targets	RNA	Endogenous	1	4	40	23	17.3778	1	1	154007	FALSE	0.308358	5.76672	0.482595	5.6872	2.5038	0.01624	0.334403	-3.16434	5.92831	5.51842
CABP2	All Targets	RNA	Endogenous	1	2	71	19	16.6861	1	1	51475	FALSE	0.214504	5.7143	-0.494958	5.64098	-2.50188	0.0163167	0.335599	-3.11928	5.33476	5.85533
TMEM249	All Targets	RNA	Endogenous	1	1	51	21	14.9207	1	1	340393	FALSE	0.228282	5.57801	-0.505812	5.50856	-2.50141	0.0163356	0.335605	-3.12571	5.19671	5.72685
ZNF485	All Targets	RNA	Endogenous	1	1	53	29	18.3312	1	1	220992	FALSE	-0.696609	5.84719	-0.474748	5.78547	-2.49993	0.0163947	0.336437	-3.15102	5.49922	5.98584
CCDC9B	All Targets	RNA	Endogenous	1	3	63	18	15.5744	1	1	388115	FALSE	-0.367983	5.62275	-0.51883	5.54734	-2.498	0.0164726	0.337284	-3.10951	5.22801	5.77087
KRTAP5-3	All Targets	RNA	Endogenous	1	1	47	15	12.2458	1	1	387266	FALSE	0.426995	5.32372	-0.499285	5.23308	-2.49798	0.0164734	0.337284	-3.11199	4.93387	5.44253
FAM200A	All Targets	RNA	Endogenous	1	4	56	21	15.5821	1	1	221786	FALSE	0.165161	5.62199	-0.515638	5.54085	-2.49637	0.0165383	0.337921	-3.13075	5.23454	5.75526
ADH1A	All Targets	RNA	Endogenous	1	1	45	13	10.8587	1	1	124	FALSE	0.235451	5.17252	-0.523514	5.07543	-2.49628	0.016542	0.337921	-3.12181	4.79722	5.27017
PTPN14	All Targets	RNA	Endogenous	1	1	53	18	13.6472	1	1	5784	FALSE	-0.161557	5.45708	-0.50599	5.38027	-2.49513	0.0165885	0.338489	-3.1228	5.08215	5.58896
NEK4	All Targets	RNA	Endogenous	1	6	62	26	23.2364	1	1	6787	FALSE	-0.775462	6.15239	0.464156	6.09192	2.49417	0.0166274	0.338741	-3.21324	6.35108	5.9105
PAM16	All Targets	RNA	Endogenous	1	4	48	17	15.7691	1	1	51025	FALSE	-0.236812	5.6353	0.454721	5.55114	2.4939	0.0166385	0.338741	-3.16589	5.81147	5.36892
KIFBP	All Targets	RNA	Endogenous	1	2	67	14	11.8374	1	1	26128	FALSE	0.635465	5.27539	-0.5418	5.18112	-2.49211	0.0167115	0.339845	-3.11957	4.87984	5.39201
ASMTL	All Targets	RNA	Endogenous	1	2	51	23	17.7422	1	1	8623	FALSE	0.0398885	5.79753	-0.519069	5.72807	-2.49103	0.0167559	0.33991	-3.1404	5.42174	5.9425
STAU1	All Targets	RNA	Endogenous	1	1	56	13	13.33	1	1	6780	FALSE	0.222319	5.44326	0.538775	5.34166	2.49081	0.016765	0.33991	-3.1505	5.69923	5.09136
RPS17	All Targets	RNA	Endogenous	1	34	876	125	118.649	1	1	6218	FALSE	0.428492	8.42628	0.472641	8.4143	2.48957	0.0168159	0.33991	-3.18393	8.71402	8.2045
LRRTM2	All Targets	RNA	Endogenous	1	1	43	22	16.1387	1	1	26045	FALSE	-0.100396	5.67776	-0.470031	5.60777	-2.48952	0.0168178	0.33991	-3.16535	5.30031	5.82299
CD300E	All Targets	RNA	Endogenous	1	1	43	20	13.4974	1	1	342510	FALSE	0.434336	5.44733	-0.491135	5.36542	-2.48938	0.0168237	0.33991	-3.15672	5.04527	5.58953
HIRA	All Targets	RNA	Endogenous	1	4	59	17	16.7666	1	1	7290	FALSE	-1.08308	5.71607	-0.502726	5.64057	-2.48928	0.0168278	0.33991	-3.14147	5.34896	5.84469
LFNG	All Targets	RNA	Endogenous	1	4	43	16	16.7201	1	1	3955	FALSE	0.440273	5.71283	0.462659	5.6309	2.48871	0.0168511	0.34	-3.18961	5.86654	5.46595
GABRB1	All Targets	RNA	Endogenous	1	3	42	17	13.7647	1	1	2560	FALSE	-0.485476	5.46149	-0.482398	5.36506	-2.48695	0.0169237	0.340509	-3.14039	5.09622	5.55324
KLF18	All Targets	RNA	Endogenous	1	2	39	19	16.0299	1	1	105378952	FALSE	-0.131177	5.66051	-0.472962	5.58566	-2.4868	0.0169298	0.340509	-3.16092	5.3155	5.77478
RBM46	All Targets	RNA	Endogenous	1	3	38	17	14.4052	1	1	166863	FALSE	0.477499	5.52139	0.464391	5.4297	2.48673	0.0169329	0.340509	-3.18273	5.68231	5.25287
CCL1	All Targets	RNA	Endogenous	1	1	42	17	11.4307	1	1	6346	FALSE	0.184699	5.24208	-0.516277	5.14673	-2.48502	0.0170038	0.341554	-3.14928	4.79386	5.39374
DGLUCY	All Targets	RNA	Endogenous	1	3	62	22	16.1647	1	1	80017	FALSE	0.342296	5.67083	-0.50709	5.60131	-2.48422	0.017037	0.341702	-3.14838	5.30045	5.81191
UTP15	All Targets	RNA	Endogenous	1	2	41	13	12.0712	1	1	84135	FALSE	0.134691	5.29399	-0.533311	5.19286	-2.48309	0.0170841	0.341702	-3.13857	4.86547	5.42204
THSD7A	All Targets	RNA	Endogenous	1	1	61	29	17.4815	1	1	221981	FALSE	0.121207	5.78342	-0.489791	5.72223	-2.48292	0.0170911	0.341702	-3.16206	5.4191	5.93442
SLC25A35	All Targets	RNA	Endogenous	1	2	40	17	13.125	1	1	399512	FALSE	0.148568	5.40132	-0.481896	5.31117	-2.48286	0.0170935	0.341702	-3.15311	5.02714	5.50998
CYB5R2	All Targets	RNA	Endogenous	1	2	50	19	14.7366	1	1	51700	FALSE	0.059115	5.55331	-0.546919	5.47024	-2.48256	0.0171059	0.341702	-3.15295	5.1114	5.72143
ADTRP	All Targets	RNA	Endogenous	1	1	44	17	13.8114	1	1	84830	FALSE	0.0624985	5.47227	-0.494631	5.39331	-2.4809	0.0171757	0.3424	-3.16039	5.08658	5.60803
ARX	All Targets	RNA	Endogenous	1	4	49	19	18.6405	1	1	170302	FALSE	0.682896	5.85916	0.459668	5.78162	2.48008	0.01721	0.3424	-3.22606	6.026	5.61055
PIRT	All Targets	RNA	Endogenous	1	1	28	15	10.1134	1	1	644139	FALSE	0.337368	5.08137	-0.509819	4.95946	-2.47902	0.0172544	0.3424	-3.1415	4.62876	5.19095
PADI1	All Targets	RNA	Endogenous	1	1	38	16	11.9819	1	1	29943	FALSE	-0.00805856	5.29152	-0.505463	5.19515	-2.479	0.0172553	0.3424	-3.14767	4.90072	5.40126
ACTR2	All Targets	RNA	Endogenous	1	11	182	38	38.9782	1	1	10097	FALSE	0.169873	6.85963	0.448773	6.82356	2.47845	0.0172784	0.3424	-3.27828	7.1029	6.62802
NEDD4	All Targets	RNA	Endogenous	1	7	107	24	24.0105	1	1	4734	FALSE	-0.460872	6.19696	0.451797	6.14005	2.47821	0.0172886	0.3424	-3.22975	6.41207	5.94963
FOXN3	All Targets	RNA	Endogenous	1	4	98	18	20.0263	1	1	1112	FALSE	-0.200161	5.95349	-0.500041	5.89514	-2.47821	0.0172887	0.3424	-3.17719	5.6076	6.09642
BCR	All Targets	RNA	Endogenous	1	1	56	17	14.0031	1	1	613	FALSE	-0.079713	5.49498	-0.476836	5.41788	-2.47811	0.0172927	0.3424	-3.1782	5.16494	5.59495
NPC2	All Targets	RNA	Endogenous	1	14	285	60	63.6812	1	1	10577	FALSE	0.082951	7.55319	0.52763	7.52362	2.49886	0.0173341	0.342637	-3.23488	7.79882	7.33099
SYP	All Targets	RNA	Endogenous	1	6	159	44	38.2729	1	1	6855	FALSE	0.33604	6.83805	-0.504587	6.80202	-2.47869	0.0173427	0.342637	-3.22373	6.48803	7.02181
GTF3C6	All Targets	RNA	Endogenous	1	4	53	18	17.0751	1	1	112495	FALSE	0.244553	5.7407	0.453223	5.6633	2.47595	0.0173841	0.34308	-3.21169	5.9538	5.45994
SUSD3	All Targets	RNA	Endogenous	1	2	44	19	16.9147	1	1	203328	FALSE	0.387279	5.73633	-0.517928	5.65643	-2.47423	0.0174569	0.343713	-3.19427	5.34137	5.87698
MFAP4	All Targets	RNA	Endogenous	1	1	47	16	14.9643	1	1	4239	FALSE	0.535819	5.57938	-0.548094	5.50214	-2.47571	0.0174625	0.343713	-3.18394	5.2016	5.71251
PLEKHO2	All Targets	RNA	Endogenous	1	4	79	31	21.328	1	1	80301	FALSE	0.169164	6.03726	-0.478372	5.98248	-2.47334	0.0174949	0.343713	-3.18936	5.67946	6.1946
FAM184A	All Targets	RNA	Endogenous	1	2	44	24	15.9074	1	1	79632	FALSE	-0.107838	5.65239	-0.478682	5.57174	-2.47239	0.0175353	0.343713	-3.18902	5.28147	5.77493
ITGB8	All Targets	RNA	Endogenous	1	19	1168	84	80.2856	1	1	3696	FALSE	0.67639	7.87705	0.481442	7.85788	2.47375	0.017536	0.343713	-3.25302	8.16201	7.645
MPC1L	All Targets	RNA	Endogenous	1	1	45	16	13.0014	1	1	347411	FALSE	-0.253587	5.39388	-0.483738	5.30369	-2.47209	0.0175484	0.343713	-3.17987	5.01814	5.50358
DDIT4	All Targets	RNA	Endogenous	1	5	164	34	28.103	1	1	54541	FALSE	0.520907	6.41671	-0.580358	6.37199	-2.48043	0.0175558	0.343713	-3.17799	6.04973	6.59756
LDLRAD4	All Targets	RNA	Endogenous	1	4	39	22	16.9734	1	1	753	FALSE	-1.20834	5.73515	0.431664	5.65541	2.47161	0.0175687	0.343713	-3.2265	5.94379	5.45354
C11orf53	All Targets	RNA	Endogenous	1	2	45	18	15.0679	1	1	341032	FALSE	0.498289	5.58479	-0.514774	5.50514	-2.4707	0.0176078	0.344106	-3.1924	5.1543	5.75072
ZSCAN2	All Targets	RNA	Endogenous	1	1	39	12	12.0174	1	1	54993	FALSE	-0.0601137	5.29962	-0.490721	5.19906	-2.46929	0.0176684	0.344917	-3.17842	4.90484	5.40502
TUBB	All Targets	RNA	Endogenous	1	6	94	24	21.7913	1	1	203068	FALSE	-0.375292	6.0663	0.463422	6.0059	2.46718	0.0177593	0.346106	-3.23247	6.27553	5.81715
PSMD1	All Targets	RNA	Endogenous	1	5	70	21	18.6908	1	1	5707	FALSE	0.164088	5.86168	0.467665	5.78978	2.46698	0.0177677	0.346106	-3.23941	6.10289	5.5706
OR5T1	All Targets	RNA	Endogenous	1	3	52	21	16.601	1	1	390155	FALSE	-0.277702	5.70223	-0.471942	5.62982	-2.466	0.0178101	0.346482	-3.19231	5.35645	5.82118
KRTAP5-1	All Targets	RNA	Endogenous	1	3	58	17	16.2729	1	1	387264	FALSE	0.484205	5.68198	-0.49033	5.60467	-2.46527	0.0178418	0.346482	-3.20351	5.30406	5.81511
AKNAD1	All Targets	RNA	Endogenous	1	2	50	17	14.5687	1	1	254268	FALSE	0.293416	5.5343	-0.478142	5.45199	-2.46521	0.0178446	0.346482	-3.18901	5.17131	5.64846
CDKAL1	All Targets	RNA	Endogenous	1	5	59	27	25.3287	1	1	54901	FALSE	-0.268309	6.26907	0.419169	6.2126	2.46397	0.0178984	0.347012	-3.27358	6.45659	6.04182
TMEM35A	All Targets	RNA	Endogenous	1	1	47	12	10.2031	1	1	59353	FALSE	0.743028	5.10904	-0.631781	4.98789	-2.47442	0.0179104	0.347012	-3.15935	4.58644	5.26889
WDR5B	All Targets	RNA	Endogenous	1	1	45	16	12.1873	1	1	54554	FALSE	0.505976	5.31811	-0.497985	5.23162	-2.46135	0.0180129	0.348304	-3.19524	4.89091	5.47013
NOB1	All Targets	RNA	Endogenous	1	1	45	21	14.4698	1	1	28987	FALSE	0.0750356	5.53357	-0.471058	5.45902	-2.46117	0.0180205	0.348304	-3.21155	5.15952	5.66866
UNC119B	All Targets	RNA	Endogenous	1	1	43	23	14.7626	1	1	84747	FALSE	0.405063	5.56001	-0.496902	5.48625	-2.46084	0.018035	0.348304	-3.20801	5.22469	5.66934
ADRA1D	All Targets	RNA	Endogenous	1	1	53	23	14.7255	1	1	146	FALSE	0.148963	5.5586	-0.511749	5.47983	-2.45954	0.0180919	0.348875	-3.21726	5.14144	5.7167
BRME1	All Targets	RNA	Endogenous	1	1	45	28	18.6547	1	1	79173	FALSE	0.360253	5.87924	0.437132	5.8114	2.45876	0.0181263	0.348875	-3.25563	6.07433	5.62735
HNRNPUL2	All Targets	RNA	Endogenous	1	8	75	27	24.7459	1	1	221092	FALSE	0.180934	6.23642	0.424224	6.18014	2.45846	0.0181396	0.348875	-3.2962	6.43729	6.00014
TPRKB	All Targets	RNA	Endogenous	1	1	56	16	15.3164	1	1	51002	FALSE	0.350792	5.61111	-0.459425	5.53698	-2.45841	0.0181419	0.348875	-3.22024	5.27982	5.71699
KCNMB4	All Targets	RNA	Endogenous	1	8	156	59	40.8444	1	1	27345	FALSE	-0.352076	6.92352	-0.418319	6.89352	-2.45788	0.018165	0.348946	-3.27885	6.63981	7.07111
TMEM177	All Targets	RNA	Endogenous	1	1	29	14	9.66645	1	1	80775	FALSE	-0.232675	5.02868	-0.547248	4.90691	-2.45672	0.0182161	0.3495	-3.18326	4.48458	5.20254
NLRC4	All Targets	RNA	Endogenous	1	1	41	17	12.7268	1	1	58484	FALSE	0.377397	5.36927	-0.493802	5.27474	-2.45581	0.0182564	0.3495	-3.21355	4.97413	5.48516
PCNA	All Targets	RNA	Endogenous	1	5	53	22	18.9595	1	1	5111	FALSE	-0.155323	5.88492	0.456685	5.8057	2.45517	0.0182848	0.3495	-3.29318	6.06086	5.62709
IL17RB	All Targets	RNA	Endogenous	1	4	37	16	14.3619	1	1	55540	FALSE	0.463095	5.51889	0.501377	5.41896	2.45435	0.0183214	0.3495	-3.2524	5.71972	5.20842
COLGALT1	All Targets	RNA	Endogenous	1	6	66	21	20.4955	1	1	79709	FALSE	-0.229098	5.98343	0.467291	5.91784	2.45423	0.0183265	0.3495	-3.2796	6.22048	5.70598
CLDN8	All Targets	RNA	Endogenous	1	2	48	16	15.4986	1	1	9073	FALSE	0.050903	5.62427	-0.486746	5.53843	-2.45407	0.0183336	0.3495	-3.229	5.22733	5.75619
SMPDL3B	All Targets	RNA	Endogenous	1	2	42	21	13.783	1	1	27293	FALSE	0.517721	5.46887	-0.521836	5.37462	-2.45397	0.018338	0.3495	-3.20712	5.04532	5.60513
HMX3	All Targets	RNA	Endogenous	1	1	37	15	10.8721	1	1	340784	FALSE	0.322882	5.16979	-0.492494	5.06287	-2.4533	0.0183681	0.3495	-3.21083	4.74784	5.2834
HSPA1A	All Targets	RNA	Endogenous	1	6	50	29	22.569	1	1	3303	FALSE	-0.116247	6.1136	0.449141	6.05023	2.45293	0.0183845	0.3495	-3.31402	6.276	5.89219
PPP1R14D	All Targets	RNA	Endogenous	1	2	40	15	11.8019	1	1	54866	FALSE	0.861737	5.267	-0.552924	5.16709	-2.45242	0.0184073	0.3495	-3.20289	4.83624	5.39868
VSIG8	All Targets	RNA	Endogenous	1	4	67	24	19.2966	1	1	391123	FALSE	-0.174702	5.90556	0.46173	5.8345	2.45242	0.0184074	0.3495	-3.28577	6.11942	5.63506
FIP1L1	All Targets	RNA	Endogenous	1	6	49	24	20.6113	1	1	81608	FALSE	0.290396	5.99048	0.431524	5.92414	2.45137	0.018454	0.3495	-3.28569	6.18171	5.74383
CYB5B	All Targets	RNA	Endogenous	1	2	78	19	17.039	1	1	80777	FALSE	-0.00749745	5.74632	0.480241	5.67084	2.45115	0.0184639	0.3495	-3.24485	5.9918	5.44617
COX7A2L	All Targets	RNA	Endogenous	1	1	46	23	15.0602	1	1	9167	FALSE	0.309244	5.59531	-0.526238	5.52295	-2.45056	0.0184903	0.3495	-3.23682	5.1739	5.76728
SLC7A6OS	All Targets	RNA	Endogenous	1	3	46	17	15.2378	1	1	84138	FALSE	0.348648	5.59644	-0.499269	5.51163	-2.45033	0.0185007	0.3495	-3.2083	5.19322	5.73452
CERS6	All Targets	RNA	Endogenous	1	5	56	27	19.9908	1	1	253782	FALSE	-0.343634	5.94953	-0.477123	5.88608	-2.45026	0.0185038	0.3495	-3.23417	5.5957	6.08934
ACTR10	All Targets	RNA	Endogenous	1	7	93	33	27.5954	1	1	55860	FALSE	-0.0165771	6.38613	0.469358	6.33683	2.44941	0.0185421	0.349857	-3.28619	6.62618	6.13428
OR6C65	All Targets	RNA	Endogenous	1	1	47	12	11.8406	1	1	403282	FALSE	0.407568	5.27522	-0.520144	5.18411	-2.44779	0.0186151	0.35055	-3.21771	4.86268	5.40911
F13A1	All Targets	RNA	Endogenous	1	3	127	26	21.3874	1	1	2162	FALSE	0.756453	6.04526	-0.565652	5.9918	-2.45601	0.0186178	0.35055	-3.23301	5.68375	6.20744
DGKK	All Targets	RNA	Endogenous	1	1	58	19	16.3819	1	1	139189	FALSE	0.166354	5.69824	-0.516469	5.63151	-2.44563	0.0187125	0.351335	-3.24147	5.32603	5.84535
PLK2	All Targets	RNA	Endogenous	1	6	52	22	19.5012	1	1	10769	FALSE	-0.149532	5.9178	0.522782	5.84508	2.45763	0.018731	0.351335	-3.28438	6.10636	5.66218
AP3S2	All Targets	RNA	Endogenous	1	5	47	17	16.2193	1	1	10239	FALSE	0.562592	5.67513	0.498504	5.58919	2.44469	0.018755	0.351335	-3.27497	5.89079	5.37807
TNNT1	All Targets	RNA	Endogenous	1	1	44	24	13.7638	1	1	7138	FALSE	-0.027473	5.46793	-0.476814	5.38427	-2.44459	0.0187596	0.351335	-3.23386	5.07813	5.59857
MEFV	All Targets	RNA	Endogenous	1	5	39	13	12.6541	1	1	4210	FALSE	-0.187424	5.34883	0.463243	5.24342	2.44433	0.0187716	0.351335	-3.24004	5.48412	5.07493
ARSJ	All Targets	RNA	Endogenous	1	1	29	18	10.9623	1	1	79642	FALSE	-0.347555	5.17874	-0.515048	5.07086	-2.44365	0.0188025	0.351335	-3.21436	4.74203	5.30104
AKAP12	All Targets	RNA	Endogenous	1	8	96	34	29.4208	1	1	9590	FALSE	0.0398115	6.47089	0.410042	6.42625	2.44336	0.0188157	0.351335	-3.31918	6.659	6.26333
NID2	All Targets	RNA	Endogenous	1	1	45	17	14.0695	1	1	22795	FALSE	-0.158861	5.49659	-0.506387	5.41922	-2.44317	0.018824	0.351335	-3.23243	5.09997	5.6427
RDH8	All Targets	RNA	Endogenous	1	1	38	15	12.7783	1	1	50700	FALSE	0.787332	5.37656	-0.518483	5.28366	-2.4427	0.0188454	0.351335	-3.24189	4.94341	5.52183
GPR158	All Targets	RNA	Endogenous	1	1	47	23	15.2814	1	1	57512	FALSE	0.487289	5.6078	-0.526719	5.53459	-2.44251	0.0188542	0.351335	-3.23675	5.16002	5.79679
PRR7	All Targets	RNA	Endogenous	1	5	38	19	16.5337	1	1	80758	FALSE	-0.637644	5.69774	0.443765	5.61418	2.44169	0.0188918	0.351349	-3.28768	5.86938	5.43554
RNF187	All Targets	RNA	Endogenous	1	7	49	16	16.2909	1	1	149603	FALSE	-0.105645	5.67743	0.435772	5.59298	2.44164	0.0188939	0.351349	-3.2875	5.84463	5.41682
PPP1R2B	All Targets	RNA	Endogenous	1	4	56	19	16.5298	1	1	153743	FALSE	0.439067	5.70652	0.592291	5.62104	2.46072	0.0189702	0.352405	-3.24081	5.95839	5.3849
CDK18	All Targets	RNA	Endogenous	1	1	40	16	12.9678	1	1	5129	FALSE	-0.252885	5.39356	-0.443834	5.30455	-2.43933	0.019	0.352594	-3.25885	5.04853	5.48376
RPL17	All Targets	RNA	Endogenous	1	12	429	44	45.6642	1	1	6139	FALSE	-0.0478161	7.08279	0.415959	7.05271	2.43861	0.0190329	0.352843	-3.33985	7.30379	6.87696
ZNF354C	All Targets	RNA	Endogenous	1	3	60	22	18.9256	1	1	30832	FALSE	0.329088	5.87881	-0.490176	5.81456	-2.43667	0.0191222	0.353329	-3.26782	5.53632	6.00933
ZNF322	All Targets	RNA	Endogenous	1	1	42	24	15.0817	1	1	79692	FALSE	-0.254878	5.59292	-0.457664	5.51014	-2.43652	0.0191293	0.353329	-3.27873	5.19424	5.73127
CALB2	All Targets	RNA	Endogenous	1	2	32	16	13.2903	1	1	794	FALSE	0.637339	5.42361	0.549206	5.32077	2.44163	0.0191642	0.353329	-3.26507	5.63754	5.09903
SWT1	All Targets	RNA	Endogenous	1	2	37	20	13.2553	1	1	54823	FALSE	-0.0186459	5.41201	-0.489596	5.31887	-2.43535	0.0191835	0.353329	-3.24049	5.01078	5.53454
CNIH1	All Targets	RNA	Endogenous	1	4	54	18	16.9334	1	1	10175	FALSE	0.141941	5.73085	0.463242	5.65355	2.43531	0.019185	0.353329	-3.28318	5.90635	5.47659
GPX4	All Targets	RNA	Endogenous	1	10	115	37	32.7078	1	1	2879	FALSE	0.608761	6.61882	0.43223	6.57631	2.43516	0.0191922	0.353329	-3.34982	6.83739	6.39356
SERPING1	All Targets	RNA	Endogenous	1	4	204	44	37.4961	1	1	710	FALSE	0.324278	6.81247	-0.506562	6.77978	-2.43496	0.0192015	0.353329	-3.28388	6.46284	7.00164
SMR3A	All Targets	RNA	Endogenous	1	1	79	23	22.8146	1	1	26952	FALSE	-0.122362	6.14418	-0.415711	6.09033	-2.43428	0.0192331	0.353329	-3.32537	5.83514	6.26897
CCNB2	All Targets	RNA	Endogenous	1	3	37	24	16.6483	1	1	9133	FALSE	0.13506	5.71051	-0.503018	5.6318	-2.43412	0.0192403	0.353329	-3.2679	5.33928	5.83657
HAUS5	All Targets	RNA	Endogenous	1	1	59	24	15.5915	1	1	23354	FALSE	0.764252	5.6431	-0.546152	5.56594	-2.43588	0.0192551	0.353329	-3.26269	5.1687	5.84401
LRRC46	All Targets	RNA	Endogenous	1	1	43	18	13.42	1	1	90506	FALSE	0.518218	5.43694	-0.501823	5.35154	-2.43326	0.0192802	0.353422	-3.26001	5.02951	5.57696
IL1B	All Targets	RNA	Endogenous	1	2	46	20	14.1661	1	1	3553	FALSE	-0.100692	5.50223	-0.468177	5.41323	-2.43285	0.0192993	0.353422	-3.26916	5.11872	5.61939
ADAM10	All Targets	RNA	Endogenous	1	1	63	25	14.9379	1	1	102	FALSE	0.122419	5.57931	-0.535236	5.50673	-2.4323	0.019325	0.353534	-3.24713	5.13292	5.7684
HSPA9	All Targets	RNA	Endogenous	1	6	85	26	23.9039	1	1	3313	FALSE	-0.207193	6.19075	0.455938	6.13564	2.43062	0.0194035	0.353619	-3.31418	6.4144	5.9405
AP4E1	All Targets	RNA	Endogenous	1	3	38	15	13.4638	1	1	23431	FALSE	0.193591	5.43313	0.472239	5.3355	2.43053	0.0194079	0.353619	-3.28568	5.60567	5.14638
RARA	All Targets	RNA	Endogenous	1	1	45	20	12.798	1	1	5914	FALSE	0.658084	5.38636	-0.569388	5.29084	-2.43841	0.0194201	0.353619	-3.26184	4.91594	5.55326
CUL5	All Targets	RNA	Endogenous	1	3	53	21	16.3206	1	1	8065	FALSE	0.0452021	5.68095	-0.472631	5.60692	-2.42949	0.0194567	0.353619	-3.26829	5.3444	5.79067
MCIDAS	All Targets	RNA	Endogenous	1	1	39	20	14.1349	1	1	345643	FALSE	-0.265	5.50281	-0.45949	5.42021	-2.42945	0.0194584	0.353619	-3.27801	5.14902	5.61005
TLX2	All Targets	RNA	Endogenous	1	4	47	20	16.6581	1	1	3196	FALSE	0.141986	5.71281	0.447034	5.62828	2.42938	0.0194616	0.353619	-3.32001	5.90395	5.43531
MSTO1	All Targets	RNA	Endogenous	1	3	56	13	11.9743	1	1	55154	FALSE	-0.136313	5.28211	-0.492757	5.18368	-2.42927	0.0194669	0.353619	-3.23851	4.863	5.40815
RPP21	All Targets	RNA	Endogenous	1	1	43	20	13.3468	1	1	79897	FALSE	-0.310973	5.45562	-0.535539	5.36323	-2.42831	0.0195118	0.354078	-3.2585	5.0112	5.60965
BACH2	All Targets	RNA	Endogenous	1	1	48	18	13.7818	1	1	60468	FALSE	0.0998837	5.48226	-0.474969	5.40849	-2.42761	0.019545	0.354313	-3.27492	5.10849	5.61849
TMEM150C	All Targets	RNA	Endogenous	1	3	42	16	14.8536	1	1	441027	FALSE	0.484193	5.56372	0.517757	5.47166	2.42871	0.01958	0.354313	-3.30132	5.79667	5.24415
AHNAK2	All Targets	RNA	Endogenous	1	1	35	16	13.1949	1	1	113146	FALSE	-0.151413	5.41723	-0.504611	5.32263	-2.42679	0.0195836	0.354313	-3.27759	5.02981	5.52761
TTI2	All Targets	RNA	Endogenous	1	2	53	19	15.3931	1	1	80185	FALSE	0.635701	5.61587	-0.487162	5.52919	-2.42576	0.0196322	0.354835	-3.28839	5.26425	5.71465
MDFIC	All Targets	RNA	Endogenous	1	1	44	20	14.9462	1	1	29969	FALSE	-0.0136118	5.57704	-0.468381	5.49738	-2.42464	0.0196854	0.355215	-3.29328	5.19527	5.70886
HAND1	All Targets	RNA	Endogenous	1	1	46	22	16.1082	1	1	9421	FALSE	0.498337	5.67741	-0.4986	5.60294	-2.42428	0.0197025	0.355215	-3.29764	5.30093	5.81435
RBP4	All Targets	RNA	Endogenous	1	1	43	24	18.0598	1	1	5950	FALSE	-0.116314	5.8303	-0.445215	5.76415	-2.4237	0.01973	0.355215	-3.31859	5.47323	5.96779
SHROOM1	All Targets	RNA	Endogenous	1	3	48	22	17.7817	1	1	134549	FALSE	0.314219	5.79428	-0.453314	5.72402	-2.42366	0.019732	0.355215	-3.29134	5.46243	5.90712
GLIS1	All Targets	RNA	Endogenous	1	1	47	13	11.4748	1	1	148979	FALSE	0.217591	5.23629	-0.479423	5.13797	-2.42012	0.0199008	0.356911	-3.27695	4.86703	5.32763
SS18L1	All Targets	RNA	Endogenous	1	2	50	15	14.0143	1	1	26039	FALSE	0.110387	5.49018	0.474613	5.39941	2.41934	0.0199382	0.356911	-3.30349	5.72363	5.17245
CRTC2	All Targets	RNA	Endogenous	1	5	56	21	19.7207	1	1	200186	FALSE	-0.0439293	5.93763	0.624901	5.86391	2.49058	0.0199448	0.356911	-3.30386	6.2815	5.57159
CT55	All Targets	RNA	Endogenous	1	1	43	23	13.3417	1	1	54967	FALSE	0.582689	5.43186	-0.504582	5.34995	-2.4192	0.0199448	0.356911	-3.28961	5.02837	5.57506
ARHGEF26	All Targets	RNA	Endogenous	1	4	222	45	34.8408	1	1	26084	FALSE	0.553592	6.71154	-0.617541	6.6752	-2.47408	0.0199459	0.356911	-3.29202	6.34172	6.90864
NUDT17	All Targets	RNA	Endogenous	1	2	43	23	14.616	1	1	200035	FALSE	0.360636	5.54282	-0.52442	5.46544	-2.41916	0.0199469	0.356911	-3.27958	5.10081	5.72068
TAF15	All Targets	RNA	Endogenous	1	4	93	27	23.4399	1	1	8148	FALSE	-0.0919051	6.16439	0.434178	6.11011	2.41878	0.0199647	0.356911	-3.32322	6.35739	5.93702
CLIP4	All Targets	RNA	Endogenous	1	2	54	23	17.3644	1	1	79745	FALSE	0.276297	5.76469	-0.47805	5.69779	-2.41812	0.0199964	0.357124	-3.29305	5.39924	5.90677
SHC2	All Targets	RNA	Endogenous	1	2	42	15	11.0637	1	1	25759	FALSE	0.245895	5.18463	-0.503515	5.08408	-2.41752	0.0200257	0.357293	-3.26593	4.76401	5.30812
ELF1	All Targets	RNA	Endogenous	1	1	62	21	16.176	1	1	1997	FALSE	0.345014	5.67926	-0.495748	5.61412	-2.4171	0.0200459	0.3573	-3.30307	5.35897	5.79273
MIF	All Targets	RNA	Endogenous	1	7	161	34	29.2504	1	1	4282	FALSE	0.619101	6.46592	0.49069	6.41999	2.4244	0.0200804	0.35752	-3.36693	6.7338	6.20033
TMEM129	All Targets	RNA	Endogenous	1	1	77	15	13.3426	1	1	92305	FALSE	0.545731	5.43653	-0.559224	5.35297	-2.42383	0.0200979	0.35752	-3.29475	4.99462	5.60381
ARF1	All Targets	RNA	Endogenous	1	8	242	29	31.486	1	1	375	FALSE	-0.106753	6.56709	0.408045	6.52445	2.4149	0.020152	0.357643	-3.36188	6.77181	6.3513
FGF2	All Targets	RNA	Endogenous	1	2	107	31	24.0085	1	1	2247	FALSE	-0.277236	6.20139	-0.45609	6.15334	-2.41472	0.0201606	0.357643	-3.31329	5.87853	6.34571
SLC15A1	All Targets	RNA	Endogenous	1	2	32	14	12.5788	1	1	6564	FALSE	-0.0654436	5.35181	-0.494948	5.24624	-2.41464	0.0201648	0.357643	-3.29346	4.94875	5.45448
COG7	All Targets	RNA	Endogenous	1	1	46	18	15.6147	1	1	91949	FALSE	-1.04531	5.63182	-0.473014	5.56299	-2.41412	0.0201899	0.357643	-3.30156	5.27504	5.76456
BMP15	All Targets	RNA	Endogenous	1	1	33	12	9.04726	1	1	9210	FALSE	0.741318	4.95812	-0.599819	4.83468	-2.41527	0.0202394	0.357643	-3.25955	4.36266	5.16509
KHNYN	All Targets	RNA	Endogenous	1	4	37	19	13.481	1	1	23351	FALSE	-0.204265	5.43506	-0.483401	5.33776	-2.41281	0.0202534	0.357643	-3.27659	5.03655	5.5486
FXR2	All Targets	RNA	Endogenous	1	4	63	20	19.1663	1	1	9513	FALSE	-0.179178	5.89264	0.441886	5.82522	2.4127	0.0202589	0.357643	-3.34044	6.0881	5.6412
CDH9	All Targets	RNA	Endogenous	1	5	48	23	18.3906	1	1	1007	FALSE	0.403241	5.83922	0.441233	5.76296	2.41261	0.0202634	0.357643	-3.35685	6.00905	5.5907
EYA3	All Targets	RNA	Endogenous	1	4	46	24	18.5138	1	1	2140	FALSE	-0.300932	5.8482	-0.454521	5.77835	-2.41127	0.0203285	0.358442	-3.31504	5.49415	5.97728
RGS19	All Targets	RNA	Endogenous	1	1	35	15	13.3428	1	1	10287	FALSE	-0.171753	5.43299	-0.475946	5.34869	-2.41078	0.0203525	0.358514	-3.31101	5.01548	5.58194
EFEMP1	All Targets	RNA	Endogenous	1	1	39	15	13.2067	1	1	2202	FALSE	0.415817	5.41671	-0.531793	5.33139	-2.41028	0.0203768	0.358591	-3.29228	5.00977	5.55652
TM9SF2	All Targets	RNA	Endogenous	1	4	73	22	18.3474	1	1	9375	FALSE	-0.439565	5.83644	0.4661	5.76663	2.40866	0.0204564	0.359333	-3.33508	6.03747	5.57705
NUCKS1	All Targets	RNA	Endogenous	1	12	142	49	43.5704	1	1	64710	FALSE	-0.676016	7.01472	0.433867	6.9833	2.40894	0.0204587	0.359333	-3.42746	7.20361	6.82909
H2AC4	All Targets	RNA	Endogenous	1	5	45	23	17.4991	1	1	8335	FALSE	-0.15687	5.77174	0.435095	5.69604	2.40725	0.0205257	0.359625	-3.35611	5.95783	5.51279
IFT20	All Targets	RNA	Endogenous	1	2	53	26	17.4401	1	1	90410	FALSE	0.359923	5.77272	-0.462474	5.70167	-2.40716	0.0205301	0.359625	-3.32256	5.42253	5.89707
WBP11	All Targets	RNA	Endogenous	1	4	48	17	17.0537	1	1	51729	FALSE	-0.0415943	5.73827	0.432426	5.6596	2.40663	0.0205562	0.359625	-3.35937	5.93517	5.46671
TRPM3	All Targets	RNA	Endogenous	1	3	127	36	33.1501	1	1	80036	FALSE	0.27836	6.64347	-0.466671	6.6	-2.4059	0.020592	0.359625	-3.37976	6.32378	6.79335
FGR	All Targets	RNA	Endogenous	1	2	39	14	12.4493	1	1	2268	FALSE	0.392081	5.33611	-0.519593	5.24595	-2.40561	0.0206067	0.359625	-3.29251	4.86698	5.51122
RBM26	All Targets	RNA	Endogenous	1	2	53	20	17.0283	1	1	64062	FALSE	0.0589043	5.74241	-0.463153	5.67595	-2.40509	0.0206322	0.359625	-3.3312	5.40096	5.86844
PEBP1	All Targets	RNA	Endogenous	1	12	128	36	38.8769	1	1	5037	FALSE	0.509104	6.8577	0.426227	6.81978	2.40443	0.020665	0.359625	-3.42386	7.03793	6.66708
CBLN4	All Targets	RNA	Endogenous	1	1	42	15	12.2676	1	1	140689	FALSE	-0.361871	5.31855	-0.48888	5.22969	-2.40442	0.0206653	0.359625	-3.301	4.93031	5.43925
SEC14L3	All Targets	RNA	Endogenous	1	1	36	22	14.3798	1	1	266629	FALSE	-0.600707	5.52684	-0.463665	5.44482	-2.40439	0.0206669	0.359625	-3.32495	5.13483	5.66181
SMIM5	All Targets	RNA	Endogenous	1	2	62	18	16.2695	1	1	643008	FALSE	0.257915	5.68062	-0.494058	5.60763	-2.40396	0.0206881	0.359625	-3.32213	5.31301	5.81386
SSR4	All Targets	RNA	Endogenous	1	6	96	26	22.6923	1	1	6748	FALSE	-0.412104	6.11895	0.424089	6.06102	2.40347	0.0207123	0.359625	-3.3713	6.322	5.87833
SYNE3	All Targets	RNA	Endogenous	1	4	60	17	15.849	1	1	161176	FALSE	0.128241	5.64406	-0.510512	5.56336	-2.40343	0.0207146	0.359625	-3.31046	5.28888	5.7555
LRTOMT	All Targets	RNA	Endogenous	1	2	48	19	14.8805	1	1	220074	FALSE	-0.223458	5.56623	-0.451535	5.4874	-2.40257	0.0207574	0.359967	-3.32878	5.19652	5.69101
GALNT1	All Targets	RNA	Endogenous	1	7	55	21	19.726	1	1	2589	FALSE	-0.487532	5.93476	0.435702	5.86118	2.40223	0.0207742	0.359967	-3.39539	6.11442	5.68391
GRHPR	All Targets	RNA	Endogenous	1	1	42	16	13.869	1	1	9380	FALSE	-0.0646029	5.47752	-0.46459	5.39321	-2.40161	0.020805	0.360155	-3.32413	5.13361	5.57494
CBR4	All Targets	RNA	Endogenous	1	1	41	18	12.0969	1	1	84869	FALSE	0.0945071	5.31892	-0.524485	5.21646	-2.40085	0.0208429	0.36016	-3.29391	4.88887	5.44576
DACH2	All Targets	RNA	Endogenous	1	2	35	23	14.351	1	1	117154	FALSE	-0.319488	5.52363	-0.521887	5.43574	-2.40041	0.0208648	0.36016	-3.31709	5.07665	5.6871
DIRC1	All Targets	RNA	Endogenous	1	1	45	16	15.0944	1	1	116093	FALSE	-0.348277	5.58802	-0.481811	5.51201	-2.4004	0.0208653	0.36016	-3.33019	5.20516	5.72681
TSPYL4	All Targets	RNA	Endogenous	1	1	54	18	15.4934	1	1	23270	FALSE	0.03078	5.62254	-0.461689	5.55145	-2.39994	0.0208884	0.360215	-3.32669	5.27762	5.74314
NLE1	All Targets	RNA	Endogenous	1	1	43	22	14.1376	1	1	54475	FALSE	0.172721	5.50746	-0.460563	5.43025	-2.39859	0.0209559	0.361033	-3.33195	5.14395	5.63065
ACTN3	All Targets	RNA	Endogenous	1	3	49	16	14.9954	1	1	89	FALSE	0.406924	5.57392	0.455316	5.48293	2.39655	0.0210589	0.361398	-3.36885	5.78439	5.27192
FMNL2	All Targets	RNA	Endogenous	1	3	58	34	19.5553	1	1	114793	FALSE	0.230086	5.92356	-0.500891	5.86577	-2.39637	0.0210675	0.361398	-3.33235	5.53835	6.09497
ARFIP1	All Targets	RNA	Endogenous	1	4	46	17	18.889	1	1	27236	FALSE	0.239378	5.87435	0.432681	5.80035	2.39629	0.0210719	0.361398	-3.3987	6.0471	5.62762
GK5	All Targets	RNA	Endogenous	1	1	38	13	10.7839	1	1	256356	FALSE	0.814485	5.16483	-0.527141	5.06757	-2.39623	0.021075	0.361398	-3.31536	4.70697	5.31999
KDM4A	All Targets	RNA	Endogenous	1	1	47	20	14.1144	1	1	9682	FALSE	0.267391	5.50063	-0.498597	5.42323	-2.39592	0.0210903	0.361398	-3.33212	5.10431	5.64647
ISCA2	All Targets	RNA	Endogenous	1	1	39	18	12.6968	1	1	122961	FALSE	0.183963	5.36936	-0.504718	5.28585	-2.39529	0.021122	0.361398	-3.32541	4.94731	5.52282
CD47	All Targets	RNA	Endogenous	1	6	127	21	22.891	1	1	961	FALSE	-0.51837	6.13155	0.444091	6.07315	2.3952	0.0211269	0.361398	-3.39203	6.33542	5.88957
CCDC107	All Targets	RNA	Endogenous	1	11	115	31	34.0754	1	1	203260	FALSE	0.203922	6.67355	0.398084	6.63225	2.39499	0.0211373	0.361398	-3.44723	6.87039	6.46555
KRTAP7-1	All Targets	RNA	Endogenous	1	1	30	15	9.93154	1	1	337878	FALSE	0.101728	5.06216	-0.485405	4.95162	-2.39356	0.0212098	0.361875	-3.32186	4.65319	5.16052
PJA1	All Targets	RNA	Endogenous	1	2	47	17	14.2533	1	1	64219	FALSE	0.435164	5.50991	-0.505731	5.43031	-2.39329	0.0212234	0.361875	-3.33008	5.10136	5.66058
CSKMT	All Targets	RNA	Endogenous	1	1	41	27	18.2519	1	1	751071	FALSE	0.0213829	5.84316	-0.419644	5.77568	-2.3932	0.0212281	0.361875	-3.38475	5.5215	5.95361
RCBTB1	All Targets	RNA	Endogenous	1	3	61	21	20.4059	1	1	55213	FALSE	0.156616	5.97781	0.420706	5.91306	2.39286	0.0212455	0.361875	-3.39869	6.14599	5.75001
HAT1	All Targets	RNA	Endogenous	1	3	58	21	19.9347	1	1	8520	FALSE	-0.341747	5.94618	0.413302	5.88068	2.3922	0.0212789	0.361885	-3.40282	6.11765	5.71481
PTMA	All Targets	RNA	Endogenous	1	19	430	72	80.2657	1	1	5757	FALSE	-0.721048	7.87127	0.394912	7.85484	2.39102	0.0213392	0.361885	-3.41301	8.08119	7.69639
NR1I2	All Targets	RNA	Endogenous	1	1	48	22	14.5752	1	1	8856	FALSE	-0.0511552	5.54841	-0.470359	5.468	-2.39087	0.0213468	0.361885	-3.34248	5.15342	5.68821
PMVK	All Targets	RNA	Endogenous	1	1	36	9	7.30438	1	1	10654	FALSE	0.816131	4.703	-0.627811	4.53506	-2.39722	0.0213558	0.361885	-3.28749	4.09418	4.84368
MAZ	All Targets	RNA	Endogenous	1	19	608	171	142.191	1	1	4150	FALSE	-0.434787	8.68409	-0.457985	8.67569	-2.39055	0.0213632	0.361885	-3.38149	8.426	8.85046
PHF12	All Targets	RNA	Endogenous	1	5	46	15	15.2075	1	1	57649	FALSE	-0.164047	5.58834	0.454755	5.50164	2.39048	0.0213664	0.361885	-3.36371	5.736	5.33759
MUC19	All Targets	RNA	Endogenous	1	3	42	13	12.3429	1	1	283463	FALSE	-0.321752	5.32041	0.475742	5.21551	2.38937	0.0214232	0.362506	-3.34869	5.49933	5.01684
KCNAB3	All Targets	RNA	Endogenous	1	6	87	21	23.706	1	1	9196	FALSE	-0.892063	6.18279	0.460174	6.12449	2.38854	0.0214657	0.362635	-3.39667	6.36683	5.95484
PRDM15	All Targets	RNA	Endogenous	1	2	39	18	13.5261	1	1	63977	FALSE	0.473432	5.43956	-0.515067	5.35553	-2.3877	0.021509	0.362635	-3.34085	5.04874	5.57028
CRP	All Targets	RNA	Endogenous	1	4	59	27	18.8259	1	1	1401	FALSE	0.657894	5.8717	-0.459345	5.80117	-2.38762	0.0215128	0.362635	-3.37179	5.53598	5.9868
GALNT17	All Targets	RNA	Endogenous	1	6	75	30	29.1158	1	1	64409	FALSE	-0.534547	6.45845	0.407072	6.40974	2.38728	0.0215305	0.362635	-3.42903	6.65302	6.23944
RPS20	All Targets	RNA	Endogenous	1	7	404	46	45.7409	1	1	6224	FALSE	0.139655	7.08492	0.404647	7.05623	2.38726	0.0215313	0.362635	-3.41954	7.31242	6.8769
NAA16	All Targets	RNA	Endogenous	1	3	51	15	15.422	1	1	79612	FALSE	0.0382537	5.60965	-0.462602	5.52498	-2.3862	0.0215859	0.363215	-3.35684	5.26072	5.70996
TLL2	All Targets	RNA	Endogenous	1	5	38	17	17.3872	1	1	7093	FALSE	-0.728844	5.76466	0.407055	5.68374	2.3857	0.0216119	0.363313	-3.41548	5.92935	5.51181
TWSG1	All Targets	RNA	Endogenous	1	5	78	29	24.3695	1	1	57045	FALSE	-0.529836	6.21575	0.416688	6.16224	2.38402	0.0216985	0.364218	-3.40689	6.41003	5.98879
COPE	All Targets	RNA	Endogenous	1	4	82	16	16.0467	1	1	11316	FALSE	0.432415	5.66222	0.511015	5.58091	2.38388	0.0217061	0.364218	-3.3708	5.90672	5.35284
TBX4	All Targets	RNA	Endogenous	1	1	32	17	13.0269	1	1	9496	FALSE	-0.450855	5.40423	-0.466499	5.30762	-2.38254	0.0217755	0.365043	-3.3705	5.00979	5.5161
COX11	All Targets	RNA	Endogenous	1	1	42	15	13.1719	1	1	1353	FALSE	0.00162704	5.42253	-0.517737	5.32955	-2.38113	0.0218485	0.365733	-3.33508	4.95828	5.58943
SMS	All Targets	RNA	Endogenous	1	4	86	20	19.6208	1	1	6611	FALSE	0.140109	5.92518	0.443662	5.85845	2.38097	0.0218572	0.365733	-3.4059	6.11728	5.67727
CALR	All Targets	RNA	Endogenous	1	40	939	155	169.84	1	1	811	FALSE	-0.0779946	8.93852	0.452609	8.92963	2.38018	0.0218985	0.366085	-3.38599	9.20448	8.73724
ASXL3	All Targets	RNA	Endogenous	1	2	37	18	12.7806	1	1	80816	FALSE	0.580213	5.38028	-0.503277	5.28176	-2.3783	0.0219966	0.36664	-3.35135	4.97572	5.49599
MCPH1	All Targets	RNA	Endogenous	1	1	38	18	13.1064	1	1	79648	FALSE	0.0744258	5.41642	-0.467845	5.33488	-2.37829	0.0219974	0.36664	-3.37754	5.04005	5.54126
MISP	All Targets	RNA	Endogenous	1	1	44	15	13.936	1	1	126353	FALSE	0.208007	5.48484	-0.459617	5.39822	-2.37787	0.0220193	0.36664	-3.38085	5.17788	5.55246
DCLK2	All Targets	RNA	Endogenous	1	2	38	14	13.1266	1	1	166614	FALSE	-0.233679	5.40191	-0.470913	5.30401	-2.37736	0.022046	0.36664	-3.36091	5.05772	5.47642
LILRB2	All Targets	RNA	Endogenous	1	3	49	23	16.0482	1	1	10288	FALSE	-0.0027744	5.66133	-0.504402	5.58414	-2.3773	0.0220489	0.36664	-3.36443	5.26165	5.80988
ORC4	All Targets	RNA	Endogenous	1	1	36	17	12.2607	1	1	5000	FALSE	0.500276	5.32351	-0.512471	5.23472	-2.3767	0.0220809	0.36664	-3.36891	4.89754	5.47074
KCNB1	All Targets	RNA	Endogenous	1	1	32	17	12.4316	1	1	3745	FALSE	0.320237	5.34758	-0.472763	5.26136	-2.37658	0.022087	0.36664	-3.3764	4.95889	5.47308
MOCS3	All Targets	RNA	Endogenous	1	13	184	50	48.5438	1	1	27304	FALSE	-0.305322	7.16521	0.374698	7.13684	2.37644	0.0220943	0.36664	-3.45875	7.36351	6.97817
ZFP14	All Targets	RNA	Endogenous	1	5	34	12	13.4441	1	1	57677	FALSE	-0.73791	5.4339	0.455486	5.32582	2.3758	0.0221281	0.366863	-3.40497	5.6331	5.11073
MTAP	All Targets	RNA	Endogenous	1	1	42	19	15.8132	1	1	4507	FALSE	0.461083	5.65274	-0.478655	5.57754	-2.3744	0.0222021	0.367752	-3.3986	5.28633	5.78139
CD300LF	All Targets	RNA	Endogenous	1	1	43	14	11.704	1	1	146722	FALSE	0.0148107	5.26158	-0.487212	5.17116	-2.37326	0.0222621	0.368408	-3.35555	4.85328	5.39368
MDN1	All Targets	RNA	Endogenous	1	2	56	21	14.6454	1	1	23195	FALSE	0.196638	5.54441	-0.528575	5.4626	-2.37276	0.0222889	0.36844	-3.36907	5.17415	5.66451
CCDC61	All Targets	RNA	Endogenous	1	5	141	27	30.2156	1	1	729440	FALSE	-0.867277	6.51939	0.419104	6.47098	2.37246	0.0223049	0.36844	-3.44579	6.69354	6.31518
TCTA	All Targets	RNA	Endogenous	1	1	73	16	14.0997	1	1	6988	FALSE	0.506943	5.51715	-0.653877	5.44093	-2.42346	0.022362	0.369045	-3.34534	5.05006	5.71455
SLC5A6	All Targets	RNA	Endogenous	1	3	45	22	15.613	1	1	8884	FALSE	-0.0680946	5.6269	-0.506398	5.54685	-2.37024	0.0224229	0.369114	-3.37926	5.2025	5.78789
GJB5	All Targets	RNA	Endogenous	1	2	37	18	13.0925	1	1	2709	FALSE	0.327996	5.40213	-0.473546	5.30548	-2.37022	0.0224239	0.369114	-3.38256	5.00821	5.51357
MYADML2	All Targets	RNA	Endogenous	1	1	31	13	8.91435	1	1	255275	FALSE	-0.336421	4.93387	-0.585562	4.8124	-2.37564	0.0224276	0.369114	-3.35119	4.37972	5.11527
ZNF581	All Targets	RNA	Endogenous	1	6	54	29	23.3646	1	1	51545	FALSE	0.583025	6.15918	0.397762	6.09869	2.36924	0.0224762	0.369527	-3.47538	6.32447	5.94065
CENPT	All Targets	RNA	Endogenous	1	3	54	24	20.0718	1	1	80152	FALSE	-0.160424	5.96067	0.440131	5.89086	2.36826	0.0225287	0.369527	-3.44439	6.15821	5.70372
SLC22A18AS	All Targets	RNA	Endogenous	1	1	62	23	17.3869	1	1	5003	FALSE	0.31358	5.78064	-0.482157	5.71427	-2.36805	0.0225398	0.369527	-3.42488	5.39259	5.93944
NOA1	All Targets	RNA	Endogenous	1	1	43	23	15.0389	1	1	84273	FALSE	-0.26525	5.58537	-0.456875	5.50617	-2.3679	0.0225478	0.369527	-3.40327	5.22613	5.7022
DUOX1	All Targets	RNA	Endogenous	1	2	37	15	13.2422	1	1	53905	FALSE	0.235373	5.41955	-0.490779	5.31764	-2.36776	0.0225551	0.369527	-3.39516	5.01759	5.52767
ADCY6	All Targets	RNA	Endogenous	1	6	118	29	28.4441	1	1	112	FALSE	-0.720224	6.42521	0.415556	6.37909	2.36556	0.0226736	0.370961	-3.46332	6.6365	6.19891
C6	All Targets	RNA	Endogenous	1	1	58	24	20.2482	1	1	729	FALSE	-0.173241	5.97787	-0.442658	5.92375	-2.36537	0.0226838	0.370961	-3.4292	5.66288	6.10636
DEGS1	All Targets	RNA	Endogenous	1	1	58	23	15.7248	1	1	8560	FALSE	-0.0165722	5.64819	-0.500546	5.57598	-2.36117	0.0229114	0.373638	-3.39252	5.26519	5.79354
PLA2G15	All Targets	RNA	Endogenous	1	5	36	22	17.1872	1	1	23659	FALSE	0.278958	5.75136	0.457338	5.66964	2.36087	0.0229275	0.373638	-3.45658	5.93422	5.48443
GJA1	All Targets	RNA	Endogenous	1	1	49	20	14.6961	1	1	2697	FALSE	0.644225	5.56035	-0.484983	5.48745	-2.35881	0.02304	0.373638	-3.41471	5.21134	5.68074
AMZ2	All Targets	RNA	Endogenous	1	2	50	22	16.4189	1	1	51321	FALSE	0.368578	5.69663	-0.51897	5.6219	-2.35826	0.0230701	0.373638	-3.40334	5.29308	5.85208
LPGAT1	All Targets	RNA	Endogenous	1	3	55	19	18.8862	1	1	9926	FALSE	0.470784	5.87966	0.484519	5.80591	2.36559	0.0230795	0.373638	-3.4749	6.14659	5.56743
CENPC	All Targets	RNA	Endogenous	1	2	55	14	12.9466	1	1	1060	FALSE	0.203658	5.38918	-0.502408	5.29931	-2.35783	0.0230933	0.373638	-3.37297	4.99965	5.50907
MAPKAPK5	All Targets	RNA	Endogenous	1	1	47	19	16.8133	1	1	8550	FALSE	-0.51177	5.73423	-0.474005	5.66275	-2.35761	0.0231054	0.373638	-3.4209	5.36297	5.8726
TRAPPC1	All Targets	RNA	Endogenous	1	7	89	24	27.0628	1	1	58485	FALSE	0.133719	6.36242	0.490814	6.30843	2.37152	0.0231485	0.373638	-3.4855	6.56994	6.12537
DNAJC5G	All Targets	RNA	Endogenous	1	1	51	20	16.5149	1	1	285126	FALSE	-0.109247	5.70611	-0.431115	5.63575	-2.35673	0.0231539	0.373638	-3.43263	5.38397	5.812
TRIM27	All Targets	RNA	Endogenous	1	1	39	21	14.2374	1	1	5987	FALSE	-0.159057	5.51206	-0.465941	5.43067	-2.35658	0.0231622	0.373638	-3.41212	5.14049	5.6338
DNAJC7	All Targets	RNA	Endogenous	1	2	60	20	16.23	1	1	7266	FALSE	-0.0633411	5.67906	-0.478603	5.60708	-2.35653	0.023165	0.373638	-3.38942	5.32858	5.80203
INVS	All Targets	RNA	Endogenous	1	2	47	18	15.6182	1	1	27130	FALSE	-0.128756	5.62569	-0.494603	5.54915	-2.3562	0.0231831	0.373638	-3.4076	5.23741	5.76736
ABCD4	All Targets	RNA	Endogenous	1	1	33	13	10.7935	1	1	5826	FALSE	-0.333085	5.16736	0.465514	5.05054	2.35553	0.0232196	0.373638	-3.39696	5.35379	4.83826
SCPEP1	All Targets	RNA	Endogenous	1	6	55	21	19.7449	1	1	59342	FALSE	0.0377158	5.93427	0.460549	5.86203	2.35545	0.023241	0.373638	-3.48388	6.14051	5.66709
TMEM14A	All Targets	RNA	Endogenous	1	3	49	16	13.8698	1	1	28978	FALSE	0.341908	5.46879	-0.46295	5.38446	-2.35513	0.0232418	0.373638	-3.40215	5.13003	5.56256
SPAM1	All Targets	RNA	Endogenous	1	1	31	19	11.9489	1	1	6677	FALSE	0.183006	5.29154	-0.480937	5.19453	-2.35491	0.0232539	0.373638	-3.41802	4.90836	5.39485
PRMT2	All Targets	RNA	Endogenous	1	4	88	39	30.6981	1	1	3275	FALSE	-0.264397	6.52965	-0.398187	6.48933	-2.35441	0.0232811	0.373638	-3.47474	6.25418	6.65393
PTF1A	All Targets	RNA	Endogenous	1	2	34	21	15.0218	1	1	256297	FALSE	0.0560796	5.57794	-0.466198	5.49273	-2.3537	0.0233207	0.373638	-3.42518	5.1918	5.70337
ZBTB7C	All Targets	RNA	Endogenous	1	4	38	17	14.2107	1	1	201501	FALSE	0.771388	5.50564	0.620686	5.40818	2.40429	0.0233448	0.373638	-3.40739	5.78359	5.14539
SPRY3	All Targets	RNA	Endogenous	1	2	33	20	12.234	1	1	10251	FALSE	-0.497307	5.30985	-0.469692	5.21505	-2.35315	0.0233512	0.373638	-3.39855	4.91007	5.42854
GPRIN3	All Targets	RNA	Endogenous	1	3	51	21	16.339	1	1	285513	FALSE	-0.633465	5.68347	-0.456104	5.60867	-2.35313	0.023352	0.373638	-3.40843	5.30802	5.81912
SUMO2	All Targets	RNA	Endogenous	1	5	106	24	21.921	1	1	6613	FALSE	0.301389	6.07907	0.446645	6.01635	2.35309	0.0233542	0.373638	-3.45947	6.31484	5.80741
C1orf109	All Targets	RNA	Endogenous	1	2	46	22	13.1031	1	1	54955	FALSE	-0.11898	5.40297	-0.507253	5.31447	-2.35306	0.0233558	0.373638	-3.38726	4.97378	5.55295
VNN3	All Targets	RNA	Endogenous	1	1	35	16	11.8568	1	1	55350	FALSE	-0.075039	5.28599	-0.478719	5.19584	-2.35302	0.0233584	0.373638	-3.41306	4.89853	5.40397
SIRPD	All Targets	RNA	Endogenous	1	1	44	20	14.4378	1	1	128646	FALSE	0.519553	5.5448	-0.478047	5.47394	-2.35236	0.0233946	0.373638	-3.43143	5.15328	5.69841
SGK2	All Targets	RNA	Endogenous	1	1	36	14	10.6838	1	1	10110	FALSE	0.233213	5.1563	-0.485333	5.03465	-2.35225	0.0234009	0.373638	-3.39976	4.77107	5.21915
XIRP2	All Targets	RNA	Endogenous	1	1	47	17	12.2681	1	1	129446	FALSE	-0.187288	5.31826	-0.483673	5.22637	-2.35214	0.0234068	0.373638	-3.39571	4.9022	5.4533
PTER	All Targets	RNA	Endogenous	1	1	34	13	11.7559	1	1	9317	FALSE	0.0594382	5.26683	-0.46662	5.16651	-2.35063	0.0234905	0.37408	-3.41292	4.91047	5.34574
MMP11	All Targets	RNA	Endogenous	1	2	85	25	21.071	1	1	4320	FALSE	0.854926	6.03345	0.946443	5.96404	2.56823	0.0235236	0.37408	-3.31724	6.4833	5.60055
CFHR4	All Targets	RNA	Endogenous	1	5	50	18	16.7883	1	1	10877	FALSE	0.0779709	5.71743	0.432256	5.63524	2.34971	0.0235417	0.37408	-3.46538	5.88492	5.46047
ASIC3	All Targets	RNA	Endogenous	1	1	59	17	16.1148	1	1	9311	FALSE	-0.417279	5.67815	-0.417342	5.60083	-2.34966	0.0235445	0.37408	-3.46172	5.36215	5.7679
CD81	All Targets	RNA	Endogenous	1	1	153	29	27.4078	1	1	975	FALSE	-0.392064	6.39751	-0.460851	6.36068	-2.34942	0.0235581	0.37408	-3.43105	6.08748	6.55192
TM9SF3	All Targets	RNA	Endogenous	1	5	76	25	22.8701	1	1	56889	FALSE	0.467102	6.13028	0.430717	6.07266	2.34941	0.0235589	0.37408	-3.48128	6.32394	5.89675
CCR8	All Targets	RNA	Endogenous	1	3	52	19	17.5936	1	1	1237	FALSE	-0.289227	5.78093	-0.438686	5.71035	-2.34894	0.0235848	0.374162	-3.43749	5.45007	5.89255
KCNH1	All Targets	RNA	Endogenous	1	1	38	21	12.4745	1	1	3756	FALSE	-0.0531212	5.34536	-0.487208	5.25021	-2.34831	0.0236202	0.374174	-3.41309	4.89876	5.49622
IL4R	All Targets	RNA	Endogenous	1	2	32	15	10.283	1	1	3566	FALSE	0.388541	5.09795	-0.55619	4.98591	-2.34819	0.023627	0.374174	-3.39063	4.70448	5.18292
GBP4	All Targets	RNA	Endogenous	1	1	61	15	13.0237	1	1	115361	FALSE	0.1641	5.40233	-0.616475	5.32019	-2.36812	0.023649	0.374186	-3.38677	5.03205	5.52188
TMEM171	All Targets	RNA	Endogenous	1	1	37	15	11.2081	1	1	134285	FALSE	0.24971	5.20831	-0.481825	5.1125	-2.34743	0.0236692	0.374186	-3.41783	4.78584	5.34115
CACNA1H	All Targets	RNA	Endogenous	1	2	41	16	13.214	1	1	8912	FALSE	-0.225231	5.4087	-0.480696	5.31779	-2.34568	0.0237676	0.375411	-3.40906	5.01575	5.52922
CD58	All Targets	RNA	Endogenous	1	1	54	19	15.8822	1	1	965	FALSE	-0.313001	5.65516	-0.439207	5.58541	-2.34458	0.0238294	0.376059	-3.44183	5.32738	5.76603
REXO4	All Targets	RNA	Endogenous	1	1	45	16	13.1633	1	1	57109	FALSE	-0.138707	5.41399	-0.488058	5.32679	-2.34392	0.0238667	0.376099	-3.42252	5.00883	5.54936
CAMK2B	All Targets	RNA	Endogenous	1	2	39	17	13.0744	1	1	816	FALSE	-0.473051	5.3949	-0.47463	5.29986	-2.34379	0.0238737	0.376099	-3.4178	5.04071	5.48127
RCN1	All Targets	RNA	Endogenous	1	7	69	31	26.6322	1	1	5954	FALSE	-1.13402	6.33481	0.397556	6.28461	2.34319	0.0239077	0.376276	-3.51962	6.50643	6.12934
RPL7	All Targets	RNA	Endogenous	1	23	830	87	97.8432	1	1	6129	FALSE	-0.447674	8.15341	0.415271	8.1396	2.34286	0.0239266	0.376276	-3.49784	8.39361	7.9618
RBM34	All Targets	RNA	Endogenous	1	4	38	17	14.7534	1	1	23029	FALSE	-1.44321	5.55216	0.440838	5.45622	2.34196	0.0239773	0.376491	-3.47734	5.72317	5.26935
SF3A1	All Targets	RNA	Endogenous	1	6	70	17	16.7571	1	1	10291	FALSE	-0.907828	5.71602	0.430634	5.63512	2.3416	0.0239975	0.376491	-3.4657	5.90137	5.44874
GLCCI1	All Targets	RNA	Endogenous	1	2	41	22	16.0296	1	1	113263	FALSE	-0.142852	5.65933	-0.426593	5.58076	-2.34151	0.0240029	0.376491	-3.45508	5.33895	5.75003
ZP1	All Targets	RNA	Endogenous	1	7	56	14	16.9615	1	1	22917	FALSE	0.418781	5.73304	0.463467	5.65031	2.33952	0.0241161	0.377537	-3.49129	5.89503	5.47901
PKD2L1	All Targets	RNA	Endogenous	1	2	39	18	14.5593	1	1	9033	FALSE	0.618749	5.53756	-0.492525	5.4527	-2.33937	0.0241241	0.377537	-3.44407	5.11952	5.68593
IFT27	All Targets	RNA	Endogenous	1	3	43	19	14.7331	1	1	11020	FALSE	0.223247	5.54971	-0.480144	5.46095	-2.33904	0.0241433	0.377537	-3.44747	5.22572	5.62561
MRPS9	All Targets	RNA	Endogenous	1	3	46	15	13.4674	1	1	64965	FALSE	-0.103732	5.43239	0.455803	5.33576	2.33886	0.0241533	0.377537	-3.44771	5.59847	5.15186
C11orf45	All Targets	RNA	Endogenous	1	3	48	16	13.6061	1	1	219833	FALSE	0.420884	5.45005	-0.526904	5.35598	-2.33795	0.0242054	0.378024	-3.41363	5.01245	5.59645
VIRMA	All Targets	RNA	Endogenous	1	4	42	19	16.1047	1	1	25962	FALSE	-0.326417	5.66302	-0.453399	5.58667	-2.3367	0.0242768	0.378238	-3.44126	5.30258	5.78553
PRKCQ	All Targets	RNA	Endogenous	1	2	40	21	16.1794	1	1	5588	FALSE	0.579718	5.68019	-0.481879	5.60155	-2.3365	0.0242881	0.378238	-3.47368	5.31871	5.79955
PLA2G12B	All Targets	RNA	Endogenous	1	1	42	23	14.2558	1	1	84647	FALSE	0.140307	5.51767	-0.441588	5.43844	-2.3364	0.0242944	0.378238	-3.46767	5.19598	5.60815
IFT122	All Targets	RNA	Endogenous	1	3	44	20	15.6318	1	1	55764	FALSE	0.0327193	5.62918	-0.482691	5.54652	-2.33624	0.024303	0.378238	-3.45497	5.26823	5.74132
ABHD16A	All Targets	RNA	Endogenous	1	19	348	63	75.5917	1	1	7920	FALSE	-0.656371	7.788	0.398851	7.76916	2.33416	0.0244225	0.37977	-3.53368	8.01292	7.59853
SEMA3D	All Targets	RNA	Endogenous	1	1	39	14	12.666	1	1	223117	FALSE	0.401577	5.36401	-0.464068	5.27616	-2.33361	0.0244547	0.379942	-3.46162	5.00402	5.46666
ZNF852	All Targets	RNA	Endogenous	1	6	56	21	20.0705	1	1	285346	FALSE	0.127366	5.95636	0.433551	5.88719	2.33247	0.0245204	0.380635	-3.52874	6.13474	5.71391
SH3PXD2A	All Targets	RNA	Endogenous	1	5	82	21	20.1378	1	1	9644	FALSE	0.129955	5.96322	0.442776	5.8982	2.3313	0.0245881	0.381264	-3.4746	6.16179	5.71368
PXN	All Targets	RNA	Endogenous	1	13	220	72	55.3578	1	1	5829	FALSE	0.0495071	7.35167	-0.657302	7.32433	-2.43541	0.0246031	0.381264	-3.46785	6.94492	7.58992
INTU	All Targets	RNA	Endogenous	1	2	63	20	15.8269	1	1	27152	FALSE	0.316747	5.64471	-0.449458	5.56892	-2.32902	0.0247205	0.382753	-3.45922	5.29749	5.75892
TLR2	All Targets	RNA	Endogenous	1	2	75	23	18.6089	1	1	7097	FALSE	0.170852	5.85869	-0.509636	5.79424	-2.33017	0.0247613	0.382767	-3.48254	5.54425	5.96924
COX6A2	All Targets	RNA	Endogenous	1	1	149	19	20.9878	1	1	1339	FALSE	0.562486	6.04581	-0.953348	5.98977	-2.48995	0.0248012	0.382767	-3.32345	5.37147	6.42258
TADA3	All Targets	RNA	Endogenous	1	1	36	17	11.8753	1	1	10474	FALSE	0.563802	5.29703	-0.551251	5.18549	-2.32811	0.0248298	0.382767	-3.43695	4.88852	5.39336
COL1A1	All Targets	RNA	Endogenous	1	11	276	39	40.0319	1	1	1277	FALSE	1.82796	6.90736	1.25249	6.86209	2.61663	0.0248477	0.382767	-3.3403	7.60236	6.34391
MRPL28	All Targets	RNA	Endogenous	1	6	45	19	17.9405	1	1	10573	FALSE	-0.15795	5.80559	0.409877	5.72847	2.32663	0.0248601	0.382767	-3.53212	5.9832	5.55016
N6AMT1	All Targets	RNA	Endogenous	1	2	60	19	16.7352	1	1	29104	FALSE	0.140295	5.71544	-0.46711	5.64423	-2.32658	0.0248626	0.382767	-3.47077	5.37789	5.83066
CYS1	All Targets	RNA	Endogenous	1	6	59	21	19.2056	1	1	192668	FALSE	-0.174416	5.89641	0.41334	5.82567	2.32643	0.0248713	0.382767	-3.52979	6.07734	5.6495
AREG	All Targets	RNA	Endogenous	1	1	48	20	15.7437	1	1	374	FALSE	0.0142133	5.65842	0.43739	5.57304	2.32554	0.0249238	0.382767	-3.52557	5.82172	5.39897
GPRIN2	All Targets	RNA	Endogenous	1	1	31	16	9.08786	1	1	9721	FALSE	0.280791	4.95354	-0.527315	4.83561	-2.32551	0.0249252	0.382767	-3.42902	4.48904	5.0782
USP31	All Targets	RNA	Endogenous	1	1	37	18	12.7563	1	1	57478	FALSE	-0.455783	5.38007	-0.489401	5.27936	-2.32537	0.0249335	0.382767	-3.47495	4.93303	5.5218
POPDC3	All Targets	RNA	Endogenous	1	3	38	21	14.6041	1	1	64208	FALSE	0.47277	5.5439	0.484675	5.45392	2.32541	0.0249548	0.382768	-3.506	5.74964	5.24692
CHRNE	All Targets	RNA	Endogenous	1	2	42	16	13.8155	1	1	1145	FALSE	0.725082	5.47365	-0.511653	5.38079	-2.32341	0.025049	0.383689	-3.45412	5.04097	5.61867
PPARGC1B	All Targets	RNA	Endogenous	1	2	44	18	13.8892	1	1	133522	FALSE	0.312639	5.47374	-0.461851	5.38739	-2.32327	0.0250574	0.383689	-3.47249	5.1638	5.54391
IFIT2	All Targets	RNA	Endogenous	1	7	74	21	23.5607	1	1	3433	FALSE	-0.483967	6.17516	0.561156	6.11294	2.37169	0.0251079	0.384006	-3.51487	6.40766	5.90664
CYSLTR2	All Targets	RNA	Endogenous	1	5	41	14	14.582	1	1	57105	FALSE	-0.123396	5.53414	0.432538	5.43889	2.32219	0.0251207	0.384006	-3.50865	5.70336	5.25377
SCIN	All Targets	RNA	Endogenous	1	1	51	26	15.4223	1	1	85477	FALSE	0.678634	5.6226	-0.509415	5.55585	-2.32276	0.0251674	0.38419	-3.49099	5.24113	5.77615
FAM47A	All Targets	RNA	Endogenous	1	4	35	17	16.4028	1	1	158724	FALSE	-0.291949	5.68968	0.412319	5.60188	2.32127	0.0251754	0.38419	-3.53433	5.8497	5.4284
RTEL1	All Targets	RNA	Endogenous	1	1	44	19	13.046	1	1	51750	FALSE	-0.278387	5.39679	-0.450023	5.31184	-2.32043	0.0252249	0.384333	-3.46755	5.0664	5.48365
ANGPT4	All Targets	RNA	Endogenous	1	2	44	18	14.6209	1	1	51378	FALSE	-0.224871	5.54139	-0.447121	5.45811	-2.31974	0.0252661	0.384333	-3.48962	5.21885	5.62559
IGSF6	All Targets	RNA	Endogenous	1	1	44	22	16.0108	1	1	10261	FALSE	-0.310899	5.66749	-0.478646	5.59745	-2.31967	0.0252699	0.384333	-3.49343	5.27436	5.82361
SPAG4	All Targets	RNA	Endogenous	1	2	42	18	11.799	1	1	6676	FALSE	0.877585	5.2733	-0.511533	5.16325	-2.31967	0.0252699	0.384333	-3.45315	4.87247	5.36679
ETV7	All Targets	RNA	Endogenous	1	3	32	10	10.9054	1	1	51513	FALSE	0.0896052	5.16394	0.488045	5.04423	2.31919	0.0252984	0.384442	-3.46921	5.31809	4.85252
FZD6	All Targets	RNA	Endogenous	1	6	42	20	17.1879	1	1	8323	FALSE	-0.0176291	5.74846	0.413625	5.6682	2.31836	0.0253477	0.384867	-3.5399	5.90118	5.50511
SGO1	All Targets	RNA	Endogenous	1	4	40	19	15.5319	1	1	151648	FALSE	-0.0837317	5.61795	0.409259	5.52864	2.31344	0.0256422	0.388608	-3.53972	5.7913	5.34477
ADORA3	All Targets	RNA	Endogenous	1	2	42	24	16.5133	1	1	140	FALSE	-0.616428	5.69749	-0.418284	5.62418	-2.31325	0.0256538	0.388608	-3.50373	5.37007	5.80206
FHL1	All Targets	RNA	Endogenous	1	3	75	22	19.0109	1	1	2273	FALSE	0.255488	5.88838	-0.532633	5.82142	-2.32025	0.0256619	0.388608	-3.49922	5.52781	6.02695
SASH1	All Targets	RNA	Endogenous	1	3	42	16	15.678	1	1	23328	FALSE	-0.287147	5.62873	-0.459853	5.54888	-2.31281	0.0256803	0.388608	-3.49697	5.29099	5.72941
TNS1	All Targets	RNA	Endogenous	1	4	136	24	25.2386	1	1	7145	FALSE	0.838632	6.27086	-0.619598	6.22045	-2.36487	0.0257344	0.389051	-3.48377	5.88183	6.45748
FDCSP	All Targets	RNA	Endogenous	1	4	64	17	18.1573	1	1	260436	FALSE	0.491048	5.83654	0.479043	5.74602	2.32509	0.0257791	0.389051	-3.57799	6.02145	5.55323
KLK8	All Targets	RNA	Endogenous	1	1	36	20	13.8246	1	1	11202	FALSE	-0.639985	5.47613	-0.452287	5.39618	-2.31057	0.0258154	0.389051	-3.50558	5.10971	5.59672
ACOT8	All Targets	RNA	Endogenous	1	2	46	24	16.5248	1	1	10005	FALSE	0.4299	5.69998	-0.491038	5.62601	-2.31027	0.0258339	0.389051	-3.49793	5.33393	5.83046
NFAM1	All Targets	RNA	Endogenous	1	6	68	23	22.5085	1	1	150372	FALSE	-0.227045	6.1101	0.391442	6.05004	2.31008	0.0258451	0.389051	-3.5645	6.29102	5.88135
SP4	All Targets	RNA	Endogenous	1	1	36	13	12.3855	1	1	6671	FALSE	-0.150882	5.33889	-0.486399	5.23974	-2.30987	0.0258579	0.389051	-3.50045	4.94182	5.44829
SPRYD4	All Targets	RNA	Endogenous	1	3	34	16	15.2167	1	1	283377	FALSE	-0.560145	5.58965	0.406529	5.50169	2.30967	0.0258701	0.389051	-3.54432	5.72317	5.34665
ATP5F1C	All Targets	RNA	Endogenous	1	6	94	27	23.9807	1	1	509	FALSE	-0.520629	6.1947	0.405798	6.13922	2.30903	0.0259087	0.389051	-3.56913	6.39356	5.96119
THYN1	All Targets	RNA	Endogenous	1	6	51	22	16.9168	1	1	29087	FALSE	0.308431	5.7285	0.431302	5.64862	2.30902	0.0259095	0.389051	-3.53909	5.90174	5.47143
NACC2	All Targets	RNA	Endogenous	1	4	69	21	17.1217	1	1	138151	FALSE	0.0644771	5.74473	-0.465371	5.67329	-2.30853	0.0259394	0.389051	-3.48663	5.38243	5.87689
TTC27	All Targets	RNA	Endogenous	1	4	49	27	16.3728	1	1	55622	FALSE	0.086843	5.68872	-0.452705	5.60785	-2.30792	0.0259765	0.389051	-3.50563	5.32876	5.80322
AQP9	All Targets	RNA	Endogenous	1	6	46	21	17.5663	1	1	366	FALSE	-0.2787	5.77704	0.407699	5.69804	2.30665	0.0260537	0.389051	-3.56324	5.93889	5.52944
RSPO1	All Targets	RNA	Endogenous	1	4	46	19	16.2812	1	1	284654	FALSE	-0.0429098	5.67769	-0.447477	5.59974	-2.30658	0.0260583	0.389051	-3.49868	5.32786	5.79005
SPA17	All Targets	RNA	Endogenous	1	1	43	19	13.1325	1	1	53340	FALSE	-0.508039	5.41554	-0.569608	5.33316	-2.31762	0.0260702	0.389051	-3.48286	4.8994	5.63679
SEBOX	All Targets	RNA	Endogenous	1	1	34	14	10.9678	1	1	645832	FALSE	0.151182	5.17703	-0.494616	5.07101	-2.30617	0.026083	0.389051	-3.4874	4.78782	5.26923
MED12	All Targets	RNA	Endogenous	1	1	62	17	13.9536	1	1	9968	FALSE	0.329079	5.49109	-0.487311	5.40974	-2.30601	0.0260929	0.389051	-3.49391	5.10063	5.62611
DENND2A	All Targets	RNA	Endogenous	1	1	59	23	15.1183	1	1	27147	FALSE	-0.365652	5.59035	-0.437426	5.52296	-2.30593	0.026098	0.389051	-3.50492	5.28498	5.68954
SPIDR	All Targets	RNA	Endogenous	1	1	35	19	12.1564	1	1	23514	FALSE	-0.172189	5.3108	-0.500957	5.21458	-2.30539	0.0261307	0.389051	-3.49518	4.92356	5.41829
TRIP6	All Targets	RNA	Endogenous	1	1	67	25	16.8101	1	1	7205	FALSE	0.200957	5.73847	-0.466431	5.67185	-2.30535	0.0261331	0.389051	-3.51258	5.35385	5.89445
ZDHHC5	All Targets	RNA	Endogenous	1	4	50	23	17.9178	1	1	25921	FALSE	0.122436	5.80681	0.433692	5.7321	2.30522	0.0261409	0.389051	-3.56379	6.01244	5.53587
TMEM116	All Targets	RNA	Endogenous	1	3	41	21	15.033	1	1	89894	FALSE	-0.0267606	5.57434	-0.440818	5.49324	-2.30446	0.0261875	0.389423	-3.50531	5.22003	5.68449
CLPS	All Targets	RNA	Endogenous	1	5	24	14	12.1925	1	1	1208	FALSE	0.524322	5.30547	0.470949	5.18946	2.30284	0.0262872	0.390041	-3.51434	5.45143	5.00607
CKAP2L	All Targets	RNA	Endogenous	1	4	51	18	16.5435	1	1	150468	FALSE	-0.153963	5.69959	0.442823	5.62048	2.30196	0.0263412	0.390041	-3.55039	5.89731	5.42671
PPP1R3A	All Targets	RNA	Endogenous	1	2	44	23	14.0755	1	1	5506	FALSE	-0.0172397	5.49392	-0.483788	5.41177	-2.30194	0.0263425	0.390041	-3.50913	5.06127	5.65713
ARHGEF6	All Targets	RNA	Endogenous	1	1	44	19	13.3723	1	1	9459	FALSE	-0.108212	5.4282	-0.438816	5.3469	-2.30182	0.0263498	0.390041	-3.51025	5.08541	5.52994
C19orf33	All Targets	RNA	Endogenous	1	4	50	18	16.1229	1	1	64073	FALSE	0.146571	5.66567	0.444246	5.58233	2.30143	0.0263744	0.390041	-3.56106	5.83332	5.40663
ISL2	All Targets	RNA	Endogenous	1	6	96	18	21.1922	1	1	64843	FALSE	-0.125904	6.0381	0.586754	5.96561	2.3519	0.0263972	0.390041	-3.53088	6.3268	5.71278
CDCP1	All Targets	RNA	Endogenous	1	1	47	18	15.6118	1	1	64866	FALSE	-0.593675	5.63392	-0.448266	5.55891	-2.30053	0.0264294	0.390041	-3.53173	5.30177	5.73891
PSMD8	All Targets	RNA	Endogenous	1	8	113	32	28.8548	1	1	5714	FALSE	-0.034117	6.44492	0.380628	6.39795	2.3004	0.0264376	0.390041	-3.61775	6.62287	6.2405
POMGNT1	All Targets	RNA	Endogenous	1	2	53	18	15.4083	1	1	55624	FALSE	0.495757	5.60833	-0.463176	5.53203	-2.29997	0.026464	0.390041	-3.52714	5.27003	5.71543
GCK	All Targets	RNA	Endogenous	1	3	49	19	15.3119	1	1	2645	FALSE	0.252677	5.59893	-0.463183	5.51798	-2.29979	0.0264755	0.390041	-3.51598	5.21774	5.72815
TPD52L3	All Targets	RNA	Endogenous	1	1	39	18	14.0789	1	1	89882	FALSE	0.32634	5.501	-0.441167	5.415	-2.29973	0.0264793	0.390041	-3.54142	5.13606	5.61026
TMEM134	All Targets	RNA	Endogenous	1	3	52	13	13.1863	1	1	80194	FALSE	0.363738	5.40314	0.463775	5.30638	2.29859	0.0265498	0.390041	-3.52618	5.56563	5.1249
MAGEB18	All Targets	RNA	Endogenous	1	6	44	19	18.9046	1	1	286514	FALSE	-1.36031	5.87327	0.387069	5.80108	2.29837	0.0265633	0.390041	-3.58561	6.02069	5.64736
MLH3	All Targets	RNA	Endogenous	1	1	42	20	15.3948	1	1	27030	FALSE	0.229016	5.61484	-0.465342	5.54012	-2.29832	0.0265663	0.390041	-3.53015	5.27282	5.72723
IFI30	All Targets	RNA	Endogenous	1	4	194	33	28.1736	1	1	10437	FALSE	0.695941	6.41542	0.49251	6.36796	2.307	0.0265864	0.390041	-3.57414	6.66869	6.15744
OR5K1	All Targets	RNA	Endogenous	1	1	42	15	11.2725	1	1	26339	FALSE	0.579709	5.22414	-0.612396	5.12309	-2.31776	0.0266276	0.390041	-3.47766	4.86441	5.30416
FCGRT	All Targets	RNA	Endogenous	1	3	72	24	20.4743	1	1	2217	FALSE	0.331885	5.98803	-0.461715	5.92921	-2.29719	0.0266367	0.390041	-3.53943	5.62471	6.14237
ODAD4	All Targets	RNA	Endogenous	1	1	52	18	14.249	1	1	83538	FALSE	-0.391236	5.52131	-0.436984	5.44114	-2.29696	0.0266512	0.390041	-3.53155	5.16134	5.637
RBM25	All Targets	RNA	Endogenous	1	2	72	19	14.0514	1	1	58517	FALSE	-0.0171266	5.50426	-0.489537	5.41368	-2.29676	0.0266638	0.390041	-3.49441	5.18662	5.57262
C15orf61	All Targets	RNA	Endogenous	1	2	46	17	13.108	1	1	145853	FALSE	0.122494	5.40439	-0.472931	5.30432	-2.29632	0.0266908	0.390041	-3.5266	5.00355	5.51485
ZNF768	All Targets	RNA	Endogenous	1	10	119	28	31.9497	1	1	79724	FALSE	0.00589353	6.58631	0.392619	6.54103	2.29618	0.0266999	0.390041	-3.63187	6.78609	6.36949
KCNK5	All Targets	RNA	Endogenous	1	2	65	20	13.0737	1	1	8645	FALSE	1.02346	5.41266	-0.570172	5.31533	-2.30971	0.0267047	0.390041	-3.50437	4.94579	5.574
FAM13A	All Targets	RNA	Endogenous	1	2	38	20	14.2915	1	1	10144	FALSE	0.356239	5.51664	-0.485347	5.42861	-2.29568	0.0267308	0.390106	-3.53784	5.12999	5.63764
CD109	All Targets	RNA	Endogenous	1	2	51	16	15.092	1	1	135228	FALSE	0.156715	5.58227	0.472398	5.49463	2.29465	0.0267955	0.390704	-3.56887	5.71998	5.33689
VXN	All Targets	RNA	Endogenous	1	1	42	18	13.9365	1	1	254778	FALSE	-0.516597	5.49257	-0.515046	5.40447	-2.29546	0.0268152	0.390704	-3.5261	5.02895	5.66733
TMF1	All Targets	RNA	Endogenous	1	3	56	25	19.1998	1	1	7110	FALSE	0.361114	5.89992	-0.416871	5.83472	-2.29346	0.0268696	0.390748	-3.56801	5.57719	6.01498
MECP2	All Targets	RNA	Endogenous	1	2	51	25	18.1716	1	1	4204	FALSE	0.160892	5.82806	-0.430844	5.76018	-2.29233	0.026941	0.390748	-3.55554	5.47691	5.95848
IFNE	All Targets	RNA	Endogenous	1	8	33	18	16.2754	1	1	338376	FALSE	0.0454613	5.68082	0.418195	5.58925	2.2923	0.0269424	0.390748	-3.6022	5.8139	5.432
MRPL11	All Targets	RNA	Endogenous	1	4	57	22	19.467	1	1	65003	FALSE	-0.0485163	5.91571	0.414029	5.8465	2.29213	0.0269533	0.390748	-3.60782	6.12923	5.64858
SNRPF	All Targets	RNA	Endogenous	1	5	67	16	14.5983	1	1	6636	FALSE	0.00349549	5.53703	0.470016	5.44683	2.2919	0.0269677	0.390748	-3.54291	5.7137	5.26002
RIMS1	All Targets	RNA	Endogenous	1	1	36	15	9.74912	1	1	22999	FALSE	0.351112	5.04481	-0.514558	4.93201	-2.29183	0.0269722	0.390748	-3.50093	4.56642	5.18793
C4orf46	All Targets	RNA	Endogenous	1	2	70	26	20.5405	1	1	201725	FALSE	-0.600393	5.9888	-0.42808	5.93136	-2.29165	0.0269834	0.390748	-3.56682	5.6583	6.12251
MRPS18C	All Targets	RNA	Endogenous	1	1	32	17	10.9581	1	1	51023	FALSE	0.466612	5.18537	-0.462814	5.08801	-2.29153	0.0269915	0.390748	-3.52596	4.78782	5.29815
ZNF724	All Targets	RNA	Endogenous	1	1	45	16	11.7477	1	1	440519	FALSE	0.751469	5.2767	-0.464586	5.18478	-2.29022	0.0270737	0.391055	-3.54573	4.88246	5.39641
ZDHHC21	All Targets	RNA	Endogenous	1	2	50	10	9.46411	1	1	340481	FALSE	0.258868	4.99811	-0.500214	4.88003	-2.28995	0.0270911	0.391055	-3.49267	4.62295	5.05998
MT4	All Targets	RNA	Endogenous	1	1	34	14	11.4544	1	1	84560	FALSE	-0.0756475	5.2384	-0.480234	5.12865	-2.28944	0.0271232	0.391055	-3.52835	4.84873	5.32459
IL19	All Targets	RNA	Endogenous	1	2	50	19	15.1707	1	1	29949	FALSE	-0.142397	5.59624	-0.432802	5.514	-2.28926	0.0271344	0.391055	-3.56044	5.25328	5.6965
H1-2	All Targets	RNA	Endogenous	1	4	183	23	20.7458	1	1	3006	FALSE	0.318164	6.00814	0.44936	5.94516	2.28921	0.0271379	0.391055	-3.55687	6.22863	5.74673
CHAF1A	All Targets	RNA	Endogenous	1	2	48	17	13.3615	1	1	10036	FALSE	0.0309846	5.43169	-0.503881	5.34387	-2.28868	0.0271712	0.391055	-3.50969	5.00256	5.58278
FOXP4	All Targets	RNA	Endogenous	1	1	53	19	17.1048	1	1	116113	FALSE	0.114362	5.75248	-0.42295	5.68661	-2.28853	0.0271805	0.391055	-3.56858	5.43082	5.86567
RCC1L	All Targets	RNA	Endogenous	1	8	89	21	23.0804	1	1	81554	FALSE	-0.272101	6.14227	0.391589	6.08397	2.28844	0.0271861	0.391055	-3.60327	6.30944	5.92614
PDZD9	All Targets	RNA	Endogenous	1	3	45	21	16.188	1	1	255762	FALSE	-0.384727	5.6723	-0.426017	5.59126	-2.28724	0.0272625	0.391617	-3.5535	5.3345	5.77099
PURG	All Targets	RNA	Endogenous	1	1	43	22	15.2183	1	1	29942	FALSE	0.355541	5.605	-0.483583	5.52551	-2.28673	0.0272947	0.391617	-3.54946	5.22431	5.73635
ELOVL1	All Targets	RNA	Endogenous	1	2	46	19	17.3546	1	1	64834	FALSE	-0.289568	5.76505	-0.440443	5.6977	-2.28635	0.0273195	0.391617	-3.55862	5.41533	5.89535
FAM178B	All Targets	RNA	Endogenous	1	1	52	19	13.688	1	1	51252	FALSE	0.459662	5.4678	-0.471629	5.38522	-2.28624	0.0273264	0.391617	-3.54112	5.12032	5.57064
ATXN7L2	All Targets	RNA	Endogenous	1	1	38	15	12.179	1	1	127002	FALSE	-0.676184	5.31091	-0.424264	5.21432	-2.28611	0.0273348	0.391617	-3.54977	4.96474	5.38901
ISOC1	All Targets	RNA	Endogenous	1	7	73	27	25.4623	1	1	51015	FALSE	-1.35221	6.27438	0.372804	6.22076	2.28578	0.0273557	0.391617	-3.63412	6.4307	6.0738
ATAD2B	All Targets	RNA	Endogenous	1	1	40	20	12.4766	1	1	54454	FALSE	0.344025	5.34728	-0.493278	5.25536	-2.28529	0.0273867	0.391617	-3.54116	4.89988	5.5042
SGIP1	All Targets	RNA	Endogenous	1	5	35	16	15.2063	1	1	84251	FALSE	0.14498	5.5882	0.426232	5.49853	2.28471	0.027424	0.391617	-3.58255	5.70252	5.35574
FMO1	All Targets	RNA	Endogenous	1	1	49	17	13.8431	1	1	2326	FALSE	-0.370436	5.47701	-0.45428	5.39369	-2.28462	0.0274296	0.391617	-3.54027	5.12833	5.57944
A1CF	All Targets	RNA	Endogenous	1	5	42	17	14.8654	1	1	29974	FALSE	0.544152	5.56155	0.444038	5.46683	2.28375	0.0274854	0.391617	-3.59839	5.70634	5.29917
SPACA9	All Targets	RNA	Endogenous	1	1	39	13	11.1387	1	1	11092	FALSE	0.31197	5.20284	-0.484841	5.0948	-2.28248	0.0275666	0.391617	-3.55255	4.83262	5.27833
ATG101	All Targets	RNA	Endogenous	1	7	71	22	19.6509	1	1	60673	FALSE	-0.255194	5.9268	0.40213	5.85614	2.28229	0.027579	0.391617	-3.61911	6.10765	5.68008
KRBOX4	All Targets	RNA	Endogenous	1	4	46	21	15.3307	1	1	55634	FALSE	-1.03143	5.60014	-0.450149	5.51564	-2.28189	0.0276046	0.391617	-3.54289	5.22347	5.72016
CHCHD7	All Targets	RNA	Endogenous	1	1	54	22	16.2172	1	1	79145	FALSE	-0.0112989	5.68224	-0.431956	5.61826	-2.2811	0.0276555	0.391617	-3.56663	5.35401	5.80323
GABRE	All Targets	RNA	Endogenous	1	1	56	14	15.2428	1	1	2564	FALSE	0.176179	5.60642	-0.472397	5.52717	-2.28103	0.0276596	0.391617	-3.56116	5.2569	5.71637
OAZ1	All Targets	RNA	Endogenous	1	9	284	47	42.6933	1	1	4946	FALSE	-0.0396224	6.9869	0.408263	6.95613	2.28093	0.027666	0.391617	-3.65648	7.21955	6.77174
APOBEC3A_B	All Targets	RNA	Endogenous	1	27	609	132	117.825	1	1	100913187	FALSE	-0.527432	8.41657	0.429939	8.40488	2.28078	0.027676	0.391617	-3.6009	8.64968	8.23352
ATP1A1	All Targets	RNA	Endogenous	1	6	119	23	20.1029	1	1	476	FALSE	-0.136949	5.95791	0.426516	5.89356	2.28002	0.0277248	0.391617	-3.58977	6.16813	5.70136
TMEM220	All Targets	RNA	Endogenous	1	1	43	15	12.1099	1	1	388335	FALSE	0.30921	5.31431	-0.475003	5.22793	-2.27937	0.0277666	0.391617	-3.55464	4.90434	5.45444
GPR137B	All Targets	RNA	Endogenous	1	7	52	25	20.2882	1	1	7107	FALSE	-0.285358	5.96737	0.39125	5.90135	2.27847	0.0278252	0.391617	-3.62582	6.1374	5.73612
SLAMF7	All Targets	RNA	Endogenous	1	1	27	11	7.72197	1	1	57823	FALSE	0.142086	4.76831	-0.491357	4.62645	-2.2782	0.0278428	0.391617	-3.52032	4.33698	4.82907
SPRED3	All Targets	RNA	Endogenous	1	1	46	12	12.0369	1	1	399473	FALSE	0.205018	5.29819	0.460729	5.19882	2.27782	0.0278669	0.391617	-3.56311	5.49344	4.99259
GPC6	All Targets	RNA	Endogenous	1	3	43	20	14.788	1	1	10082	FALSE	0.533213	5.55682	0.454487	5.46685	2.27756	0.0278837	0.391617	-3.58907	5.75047	5.26832
RFC5	All Targets	RNA	Endogenous	1	1	50	22	15.9732	1	1	5985	FALSE	-0.239376	5.66608	-0.409727	5.58971	-2.27755	0.0278847	0.391617	-3.5933	5.36169	5.74933
LCE3B	All Targets	RNA	Endogenous	1	1	41	12	10.1777	1	1	353143	FALSE	0.819921	5.09413	-0.508683	4.98788	-2.27753	0.0278859	0.391617	-3.54927	4.71234	5.18076
ENPP5	All Targets	RNA	Endogenous	1	1	28	12	10.9174	1	1	59084	FALSE	-1.02204	5.17102	-0.47496	5.0622	-2.27721	0.0279067	0.391617	-3.53765	4.78213	5.25824
PRSS27	All Targets	RNA	Endogenous	1	2	38	16	11.9067	1	1	83886	FALSE	0.732969	5.2814	-0.4596	5.18199	-2.27714	0.0279109	0.391617	-3.56365	4.91656	5.3678
BFAR	All Targets	RNA	Endogenous	1	2	41	14	12.95	1	1	51283	FALSE	-0.0715788	5.38983	-0.48394	5.294	-2.27708	0.0279148	0.391617	-3.55796	5.00878	5.49365
SMIM10L2B	All Targets	RNA	Endogenous	1	3	61	20	17.5443	1	1	644596	FALSE	0.224302	5.77973	-0.455009	5.71384	-2.27701	0.0279194	0.391617	-3.5734	5.4211	5.91876
STRADA	All Targets	RNA	Endogenous	1	1	49	19	14.3503	1	1	92335	FALSE	0.662356	5.52872	-0.498289	5.4498	-2.27694	0.0279242	0.391617	-3.5569	5.12906	5.67432
CYBC1	All Targets	RNA	Endogenous	1	2	52	26	17.456	1	1	79415	FALSE	-0.209973	5.77148	-0.4096	5.70727	-2.27671	0.0279391	0.391617	-3.57865	5.47347	5.87092
AQP11	All Targets	RNA	Endogenous	1	1	30	14	11.5724	1	1	282679	FALSE	0.962674	5.25528	-0.478	5.14713	-2.27658	0.0279473	0.391617	-3.5702	4.94823	5.28636
NDUFS2	All Targets	RNA	Endogenous	1	6	45	15	17.0662	1	1	4720	FALSE	-0.191839	5.73923	0.398753	5.65793	2.27658	0.0279477	0.391617	-3.62746	5.91881	5.47531
OR52I2	All Targets	RNA	Endogenous	1	2	39	18	12.5557	1	1	143502	FALSE	0.126708	5.34309	-0.478794	5.251	-2.27618	0.0279737	0.391617	-3.54149	4.95196	5.46033
PSMB4	All Targets	RNA	Endogenous	1	2	88	7	11.4407	1	1	5692	FALSE	0.410167	5.24364	0.533336	5.12648	2.276	0.027985	0.391617	-3.51583	5.42558	4.91711
LOX	All Targets	RNA	Endogenous	1	2	43	17	13.9177	1	1	4015	FALSE	-0.303277	5.47627	-0.501617	5.39062	-2.27558	0.0280129	0.391703	-3.55487	5.09754	5.59578
TMEM218	All Targets	RNA	Endogenous	1	8	50	25	21.1321	1	1	219854	FALSE	-0.386791	6.02286	0.386545	5.95694	2.27512	0.0280428	0.391817	-3.65261	6.18084	5.80022
TADA2B	All Targets	RNA	Endogenous	1	1	55	20	14.2765	1	1	93624	FALSE	0.291611	5.52951	-0.456859	5.4575	-2.27376	0.0281312	0.392472	-3.58464	5.19772	5.63934
PTP4A3	All Targets	RNA	Endogenous	1	8	210	31	35.0907	1	1	11156	FALSE	0.171094	6.71888	0.4063	6.6778	2.27326	0.028164	0.392472	-3.6525	6.90679	6.51751
ZEB2	All Targets	RNA	Endogenous	1	5	156	51	33.3741	1	1	9839	FALSE	0.241319	6.64911	-0.463068	6.61403	-2.27308	0.0281757	0.392472	-3.58768	6.33534	6.80912
OXGR1	All Targets	RNA	Endogenous	1	1	49	17	13.9908	1	1	27199	FALSE	0.189346	5.49532	-0.422246	5.40875	-2.27307	0.0281767	0.392472	-3.59443	5.15966	5.58311
OTUB1	All Targets	RNA	Endogenous	1	1	59	21	15.1648	1	1	55611	FALSE	0.716639	5.60221	-0.469875	5.52221	-2.2719	0.0282532	0.392842	-3.57368	5.20081	5.74718
ZSCAN10	All Targets	RNA	Endogenous	1	2	36	19	13.7889	1	1	84891	FALSE	0.0572235	5.46307	-0.444451	5.37275	-2.2718	0.0282599	0.392842	-3.56498	5.12673	5.54496
FMC1	All Targets	RNA	Endogenous	1	5	42	14	14.418	1	1	154791	FALSE	0.135937	5.51931	0.441334	5.42392	2.27166	0.0282686	0.392842	-3.60206	5.69477	5.23432
PNPLA1	All Targets	RNA	Endogenous	1	1	38	17	14.9293	1	1	285848	FALSE	0.247934	5.57931	-0.436535	5.49265	-2.27077	0.028327	0.393081	-3.60366	5.26004	5.65548
ZNF276	All Targets	RNA	Endogenous	1	4	47	21	16.4396	1	1	92822	FALSE	0.25152	5.69168	0.438004	5.61161	2.27028	0.0283596	0.393081	-3.60954	5.87378	5.42809
TMSB15B	All Targets	RNA	Endogenous	1	2	44	17	15.2954	1	1	286527	FALSE	0.354195	5.60474	-0.449399	5.52461	-2.26977	0.0283931	0.393081	-3.59606	5.23362	5.72831
LAMB2	All Targets	RNA	Endogenous	1	4	78	26	22.4855	1	1	3913	FALSE	0.164207	6.11196	-0.543992	6.05863	-2.28307	0.0283941	0.393081	-3.57417	5.75074	6.27415
FOXA3	All Targets	RNA	Endogenous	1	5	39	19	16.7584	1	1	3171	FALSE	0.0421891	5.71632	0.419898	5.63304	2.26951	0.0284102	0.393081	-3.63231	5.89569	5.44919
ENHO	All Targets	RNA	Endogenous	1	1	38	20	12.9653	1	1	375704	FALSE	0.24702	5.39603	-0.46804	5.30323	-2.26942	0.0284165	0.393081	-3.56424	5.03012	5.49441
KIF2B	All Targets	RNA	Endogenous	1	1	35	12	11.1746	1	1	84643	FALSE	0.480476	5.22623	-0.564617	5.11836	-2.27511	0.0284658	0.39346	-3.54266	4.80362	5.33868
DLG5	All Targets	RNA	Endogenous	1	2	55	18	16.1346	1	1	9231	FALSE	-0.00834732	5.68023	0.518141	5.59248	2.28067	0.0285018	0.393596	-3.60117	5.95794	5.33665
PAPPA	All Targets	RNA	Endogenous	1	2	43	19	14.2986	1	1	5069	FALSE	-0.164684	5.51135	-0.460628	5.42508	-2.26735	0.0285528	0.393596	-3.57903	5.15648	5.6131
INSL4	All Targets	RNA	Endogenous	1	3	41	19	15.6006	1	1	3641	FALSE	-0.453929	5.62288	-0.437078	5.53998	-2.26692	0.0285815	0.393596	-3.58535	5.27759	5.72365
ALOX5AP	All Targets	RNA	Endogenous	1	7	68	23	22.6338	1	1	241	FALSE	-0.359593	6.11629	0.39318	6.05493	2.26667	0.0285981	0.393596	-3.67529	6.29246	5.88866
GSTP1	All Targets	RNA	Endogenous	1	8	131	43	33.8352	1	1	2950	FALSE	0.101394	6.66434	0.389178	6.62466	2.26594	0.0286466	0.393596	-3.68227	6.84897	6.46764
SEPHS1	All Targets	RNA	Endogenous	1	6	50	19	17.8763	1	1	22929	FALSE	-0.121523	5.80015	0.395122	5.72372	2.26581	0.028655	0.393596	-3.64287	5.93584	5.57524
TEX29	All Targets	RNA	Endogenous	1	2	34	21	14.6546	1	1	121793	FALSE	0.142687	5.54484	-0.447583	5.45642	-2.26578	0.028657	0.393596	-3.5887	5.18885	5.64371
PRR36	All Targets	RNA	Endogenous	1	1	34	14	8.57756	1	1	80164	FALSE	0.515311	4.87983	-0.527788	4.75222	-2.26541	0.0286819	0.393596	-3.53989	4.41479	4.98842
TMEM91	All Targets	RNA	Endogenous	1	1	41	14	12.0202	1	1	641649	FALSE	0.266224	5.29822	-0.536983	5.1949	-2.26744	0.0287046	0.393596	-3.566	4.91233	5.3927
IGF1R	All Targets	RNA	Endogenous	1	7	59	22	23.1019	1	1	3480	FALSE	0.489451	6.14386	0.423228	6.08304	2.26501	0.0287085	0.393596	-3.68116	6.32619	5.91283
ADIPOR2	All Targets	RNA	Endogenous	1	2	68	16	17.0475	1	1	79602	FALSE	0.47769	5.7427	-0.496827	5.67002	-2.26511	0.0287156	0.393596	-3.59223	5.42233	5.84341
APOE	All Targets	RNA	Endogenous	1	4	165	19	19.8632	1	1	348	FALSE	0.810001	5.94804	0.507642	5.88324	2.26433	0.0288922	0.39565	-3.59722	6.19779	5.66305
GCHFR	All Targets	RNA	Endogenous	1	5	48	12	14.4189	1	1	2644	FALSE	-0.249256	5.5203	0.452895	5.42421	2.26189	0.0289164	0.39565	-3.61542	5.71709	5.2192
RGS10	All Targets	RNA	Endogenous	1	3	89	19	18.3316	1	1	6001	FALSE	0.350918	5.84124	0.452882	5.76905	2.2615	0.028943	0.39565	-3.62938	6.12076	5.52285
MARCKSL1	All Targets	RNA	Endogenous	1	6	72	23	21.7115	1	1	65108	FALSE	0.415728	6.06175	0.427604	5.99725	2.26164	0.0289532	0.39565	-3.68818	6.23834	5.82849
HNRNPH3	All Targets	RNA	Endogenous	1	6	105	32	26.683	1	1	3189	FALSE	-0.0162459	6.33994	0.407718	6.29249	2.26074	0.0289937	0.395903	-3.651	6.53791	6.1207
CEACAM19	All Targets	RNA	Endogenous	1	6	54	22	18.449	1	1	56971	FALSE	-0.331416	5.84382	0.419383	5.7657	2.25976	0.0290594	0.3965	-3.66838	6.01122	5.59384
GRAMD1A	All Targets	RNA	Endogenous	1	5	46	23	19.6237	1	1	57655	FALSE	0.0227732	5.92408	0.404486	5.8544	2.25878	0.0291259	0.396872	-3.65911	6.08696	5.69161
BNC1	All Targets	RNA	Endogenous	1	1	41	20	15.9646	1	1	646	FALSE	-0.374373	5.66113	-0.436553	5.59221	-2.25871	0.0291306	0.396872	-3.61067	5.32951	5.7761
FAT2	All Targets	RNA	Endogenous	1	5	48	20	18.5994	1	1	2196	FALSE	-0.373646	5.86351	-0.387777	5.77981	-2.25625	0.0292968	0.398446	-3.64834	5.55916	5.93426
SSTR4	All Targets	RNA	Endogenous	1	1	59	23	15.4169	1	1	6754	FALSE	-0.252808	5.62226	-0.485349	5.54467	-2.25515	0.0293715	0.398446	-3.61006	5.21644	5.77444
TMTC3	All Targets	RNA	Endogenous	1	2	62	18	15.9058	1	1	160418	FALSE	-0.0336896	5.66054	0.458282	5.57486	2.25477	0.0293972	0.398446	-3.62516	5.86607	5.37102
PDP1	All Targets	RNA	Endogenous	1	2	41	17	14.462	1	1	54704	FALSE	0.495645	5.52644	-0.482476	5.43822	-2.25404	0.0294468	0.398446	-3.60127	5.14996	5.64001
MAP7D3	All Targets	RNA	Endogenous	1	1	37	19	14.8737	1	1	79649	FALSE	0.19209	5.57388	-0.447691	5.49058	-2.25385	0.0294594	0.398446	-3.63503	5.22299	5.6779
RGS4	All Targets	RNA	Endogenous	1	4	42	16	16.6182	1	1	5999	FALSE	0.293132	5.71144	0.42708	5.62425	2.25336	0.029493	0.398446	-3.67852	5.92598	5.41304
FLT3LG	All Targets	RNA	Endogenous	1	1	35	19	11.1051	1	1	2323	FALSE	0.214781	5.2017	-0.512727	5.09624	-2.25335	0.0294938	0.398446	-3.59243	4.72785	5.35411
RAVER2	All Targets	RNA	Endogenous	1	3	46	14	14.6618	1	1	55225	FALSE	-0.120862	5.54221	-0.441437	5.45842	-2.25288	0.029526	0.398446	-3.59243	5.20262	5.63747
KCTD1	All Targets	RNA	Endogenous	1	2	55	26	18.8493	1	1	284252	FALSE	-0.534947	5.87274	-0.421723	5.8109	-2.25268	0.0295393	0.398446	-3.62745	5.57048	5.97919
VPS72	All Targets	RNA	Endogenous	1	1	39	17	12.9793	1	1	6944	FALSE	-0.139912	5.39303	-0.467856	5.3038	-2.25238	0.0295598	0.398446	-3.6057	5.005	5.51296
RND1	All Targets	RNA	Endogenous	1	3	59	26	17.2598	1	1	27289	FALSE	0.315216	5.75693	-0.460819	5.68312	-2.25186	0.0295955	0.398446	-3.61901	5.40661	5.87667
NHLH2	All Targets	RNA	Endogenous	1	6	88	30	24.08	1	1	4808	FALSE	-0.612931	6.20059	0.390058	6.14417	2.25179	0.0296002	0.398446	-3.67301	6.39932	5.96556
ERFE	All Targets	RNA	Endogenous	1	2	44	13	10.6793	1	1	151176	FALSE	0.207767	5.14562	-0.54266	5.03642	-2.2517	0.0296254	0.398446	-3.57006	4.58244	5.35421
HSPA5	All Targets	RNA	Endogenous	1	4	62	17	14.3279	1	1	3309	FALSE	0.407943	5.51668	0.490079	5.42266	2.25138	0.0296286	0.398446	-3.6114	5.70284	5.22653
GADD45B	All Targets	RNA	Endogenous	1	3	83	25	20.9656	1	1	4616	FALSE	0.623355	6.01673	-0.437511	5.9606	-2.25122	0.0296395	0.398446	-3.63723	5.69321	6.14778
GAREM1	All Targets	RNA	Endogenous	1	1	41	11	8.96968	1	1	64762	FALSE	0.548959	4.94946	-0.616508	4.82559	-2.27012	0.0296706	0.398446	-3.55263	4.35054	5.15813
CRB2	All Targets	RNA	Endogenous	1	1	30	15	10.5855	1	1	286204	FALSE	-0.0477496	5.13804	-0.486514	5.03257	-2.25059	0.0296824	0.398446	-3.57496	4.70806	5.25973
SDC3	All Targets	RNA	Endogenous	1	10	149	28	28.5119	1	1	9672	FALSE	-0.190772	6.43035	0.392733	6.38195	2.25048	0.0296899	0.398446	-3.70383	6.61041	6.22204
C6orf52	All Targets	RNA	Endogenous	1	1	33	15	9.69744	1	1	347744	FALSE	-0.420847	5.03211	-0.482894	4.92274	-2.25029	0.0297031	0.398446	-3.59286	4.6681	5.10099
BCAN	All Targets	RNA	Endogenous	1	2	54	19	16.1219	1	1	63827	FALSE	-0.105448	5.6661	-0.426503	5.58991	-2.25025	0.0297056	0.398446	-3.62713	5.35301	5.75575
GIMAP8	All Targets	RNA	Endogenous	1	3	49	18	14.3374	1	1	155038	FALSE	0.457482	5.51755	-0.49756	5.43268	-2.24986	0.0297327	0.398446	-3.58104	5.12273	5.64964
RAB21	All Targets	RNA	Endogenous	1	2	67	20	16.0795	1	1	23011	FALSE	0.88109	5.67024	-0.550113	5.59835	-2.26406	0.0297503	0.398446	-3.6036	5.29553	5.81032
SLC44A2	All Targets	RNA	Endogenous	1	4	82	30	23.6516	1	1	57153	FALSE	-0.378344	6.17763	-0.441009	6.12852	-2.24939	0.0297645	0.398446	-3.62903	5.86418	6.31356
DLGAP5	All Targets	RNA	Endogenous	1	1	50	18	14.819	1	1	9787	FALSE	-0.814135	5.5641	-0.447353	5.48697	-2.24899	0.0297921	0.398446	-3.62329	5.22106	5.6731
GABRR2	All Targets	RNA	Endogenous	1	2	41	14	13.1297	1	1	2570	FALSE	-0.576103	5.40071	-0.465097	5.30804	-2.24863	0.029817	0.398446	-3.61188	5.04685	5.49087
GATB	All Targets	RNA	Endogenous	1	2	46	21	16.0617	1	1	5188	FALSE	-0.31505	5.66253	-0.43941	5.59264	-2.24818	0.029848	0.398446	-3.62375	5.31708	5.78554
SCCPDH	All Targets	RNA	Endogenous	1	2	79	25	19.9608	1	1	51097	FALSE	-0.455184	5.95062	-0.433054	5.89423	-2.24799	0.0298611	0.398446	-3.62378	5.66318	6.05596
TYMP	All Targets	RNA	Endogenous	1	5	76	19	19.2637	1	1	1890	FALSE	0.14624	5.90004	0.421563	5.83039	2.24788	0.0298689	0.398446	-3.67179	6.09793	5.64311
NR4A1	All Targets	RNA	Endogenous	1	4	365	53	49.8399	1	1	3164	FALSE	1.04687	7.20655	-0.572774	7.18148	-2.29021	0.0298949	0.398446	-3.62317	6.82044	7.4342
BMERB1	All Targets	RNA	Endogenous	1	6	57	27	24.3573	1	1	89927	FALSE	-0.198363	6.22146	0.499147	6.15967	2.26412	0.0299088	0.398446	-3.66736	6.4401	5.96336
SPEM1	All Targets	RNA	Endogenous	1	1	45	16	12.9617	1	1	374768	FALSE	0.420798	5.3929	-0.450742	5.3123	-2.24605	0.0299954	0.399185	-3.62277	5.03064	5.50947
CHAD	All Targets	RNA	Endogenous	1	1	43	22	15.9056	1	1	1101	FALSE	0.518313	5.65917	-0.436163	5.5851	-2.24585	0.0300086	0.399185	-3.65058	5.31319	5.77543
OR4C12	All Targets	RNA	Endogenous	1	3	44	16	12.5707	1	1	283093	FALSE	0.454087	5.34742	0.4804	5.24385	2.24522	0.0300525	0.399474	-3.62619	5.5171	5.05257
DMD	All Targets	RNA	Endogenous	1	3	52	27	17.8563	1	1	1756	FALSE	0.246605	5.80149	-0.45716	5.73501	-2.24433	0.0301144	0.400003	-3.62632	5.43876	5.94238
RPLP1	All Targets	RNA	Endogenous	1	27	691	78	94.2008	1	1	6176	FALSE	0.303611	8.09987	0.528614	8.08401	2.27421	0.0301799	0.400398	-3.66073	8.40312	7.86063
LIG3	All Targets	RNA	Endogenous	1	1	44	20	15.014	1	1	3980	FALSE	0.696145	5.58518	-0.47775	5.50721	-2.24326	0.0301886	0.400398	-3.64409	5.19872	5.72315
GPR182	All Targets	RNA	Endogenous	1	1	44	16	14.7915	1	1	11318	FALSE	0.299051	5.5642	-0.438894	5.4841	-2.24261	0.0302337	0.400702	-3.64211	5.21992	5.66902
NUP205	All Targets	RNA	Endogenous	1	4	36	17	15.6662	1	1	23165	FALSE	-0.155809	5.62851	0.407007	5.54024	2.24179	0.0302913	0.400888	-3.6795	5.77548	5.37557
ZKSCAN5	All Targets	RNA	Endogenous	1	6	59	17	17.3208	1	1	23660	FALSE	-0.421274	5.75859	0.431299	5.6825	2.24178	0.0302922	0.400888	-3.66311	5.9235	5.51379
PLN	All Targets	RNA	Endogenous	1	1	33	15	11.8983	1	1	5350	FALSE	0.266112	5.29433	-0.50114	5.20109	-2.24212	0.0303422	0.400996	-3.62809	4.87742	5.42765
ANK1	All Targets	RNA	Endogenous	1	6	76	31	23.3893	1	1	286	FALSE	0.0327053	6.1668	0.429427	6.10152	2.24102	0.0303448	0.400996	-3.71112	6.34236	5.93293
NXPH3	All Targets	RNA	Endogenous	1	1	48	21	17.7805	1	1	11248	FALSE	-0.312274	5.80632	-0.391872	5.744	-2.24064	0.0303715	0.401055	-3.66762	5.51858	5.90178
HTRA2	All Targets	RNA	Endogenous	1	7	43	15	16.1212	1	1	27429	FALSE	0.266171	5.66522	0.41919	5.57793	2.23838	0.0305303	0.402254	-3.68823	5.81993	5.40853
FREM1	All Targets	RNA	Endogenous	1	3	62	15	15.0967	1	1	158326	FALSE	0.19937	5.5787	0.433381	5.49331	2.23825	0.0305392	0.402254	-3.66209	5.76114	5.30583
THEM5	All Targets	RNA	Endogenous	1	10	161	37	32.0672	1	1	284486	FALSE	-0.558081	6.59128	0.398225	6.54815	2.23777	0.0305727	0.402254	-3.73353	6.76385	6.39716
C11orf21	All Targets	RNA	Endogenous	1	1	36	16	13.6812	1	1	29125	FALSE	0.555476	5.46509	-0.501947	5.37698	-2.23861	0.030588	0.402254	-3.63417	5.07435	5.58883
HLA-DMA	All Targets	RNA	Endogenous	1	3	109	29	27.293	1	1	3108	FALSE	0.311336	6.37264	0.406926	6.32614	2.23746	0.0305948	0.402254	-3.69933	6.56258	6.16062
MAPK15	All Targets	RNA	Endogenous	1	3	30	14	12.865	1	1	225689	FALSE	-0.287407	5.37375	0.425076	5.26943	2.23744	0.0305961	0.402254	-3.65187	5.51361	5.09851
FLG2	All Targets	RNA	Endogenous	1	1	45	22	14.593	1	1	388698	FALSE	-0.297973	5.54655	-0.463174	5.46806	-2.23659	0.030656	0.402617	-3.64687	5.16099	5.683
ZNF544	All Targets	RNA	Endogenous	1	3	46	21	15.3822	1	1	27300	FALSE	-0.177638	5.60262	-0.424527	5.52089	-2.23642	0.0306683	0.402617	-3.63124	5.28719	5.68448
KCNK7	All Targets	RNA	Endogenous	1	1	32	16	10.7715	1	1	10089	FALSE	0.12633	5.15698	-0.434368	5.04927	-2.23581	0.0307113	0.402887	-3.63195	4.81301	5.21466
SLC9A3	All Targets	RNA	Endogenous	1	3	53	15	15.0998	1	1	6550	FALSE	-0.125169	5.58697	-0.467771	5.50478	-2.23466	0.0307926	0.403378	-3.61554	5.24195	5.68877
LMLN	All Targets	RNA	Endogenous	1	3	49	23	16.5724	1	1	89782	FALSE	-0.106153	5.70096	-0.423786	5.62803	-2.23397	0.0308411	0.403378	-3.64186	5.37144	5.80764
NUDT11	All Targets	RNA	Endogenous	1	1	46	16	12.7693	1	1	55190	FALSE	0.164774	5.37054	-0.453747	5.28383	-2.23353	0.0308723	0.403378	-3.6317	5.02129	5.46761
PAGE1	All Targets	RNA	Endogenous	1	2	38	21	13.6434	1	1	8712	FALSE	0.258799	5.45201	-0.470699	5.36368	-2.23341	0.0308813	0.403378	-3.64226	5.05276	5.58132
SLC7A9	All Targets	RNA	Endogenous	1	1	38	13	11.1286	1	1	11136	FALSE	0.379987	5.19923	-0.454542	5.09518	-2.23336	0.0308844	0.403378	-3.63277	4.84003	5.27378
RFX1	All Targets	RNA	Endogenous	1	1	45	16	13.294	1	1	5989	FALSE	0.240685	5.42504	-0.437466	5.3376	-2.23327	0.0308911	0.403378	-3.63552	5.08559	5.51401
ZNF438	All Targets	RNA	Endogenous	1	1	38	17	13.8021	1	1	220929	FALSE	0.251168	5.47153	-0.433112	5.38935	-2.23282	0.030923	0.403378	-3.65578	5.14406	5.56105
DNAJC1	All Targets	RNA	Endogenous	1	3	50	24	17.9014	1	1	64215	FALSE	-0.172001	5.80391	-0.447715	5.73556	-2.23276	0.0309276	0.403378	-3.64552	5.45045	5.93513
PAQR5	All Targets	RNA	Endogenous	1	1	32	13	9.71031	1	1	54852	FALSE	0.63529	5.0409	-0.544618	4.92194	-2.23458	0.0309601	0.403474	-3.61078	4.52798	5.19772
VPREB3	All Targets	RNA	Endogenous	1	4	53	18	15.1416	1	1	29802	FALSE	0.133424	5.5857	0.435889	5.49568	2.23202	0.0309797	0.403474	-3.67204	5.80022	5.2825
MCCC2	All Targets	RNA	Endogenous	1	1	37	15	14.99	1	1	64087	FALSE	-0.44382	5.57949	-0.439066	5.50152	-2.23039	0.0310965	0.404466	-3.66042	5.25846	5.67166
PMP2	All Targets	RNA	Endogenous	1	5	198	53	43.8884	1	1	5375	FALSE	0.325662	7.02656	-0.419873	6.99894	-2.22978	0.0311396	0.404466	-3.70851	6.73852	7.18122
DEXI	All Targets	RNA	Endogenous	1	3	51	20	18.0267	1	1	28955	FALSE	-0.128625	5.81286	0.399421	5.73776	2.22974	0.0311425	0.404466	-3.71863	5.97843	5.56929
OSR1	All Targets	RNA	Endogenous	1	1	46	27	16.9871	1	1	130497	FALSE	0.229458	5.74987	-0.424609	5.68221	-2.2297	0.0311455	0.404466	-3.6686	5.41648	5.86823
PYHIN1	All Targets	RNA	Endogenous	1	3	55	19	16.2357	1	1	149628	FALSE	0.593007	5.67932	-0.448021	5.59925	-2.22873	0.0312151	0.404706	-3.66471	5.31183	5.80045
LAMB3	All Targets	RNA	Endogenous	1	4	46	15	14.0708	1	1	3914	FALSE	0.165228	5.48948	0.476656	5.39569	2.22862	0.0312229	0.404706	-3.67074	5.69759	5.18436
SLC38A11	All Targets	RNA	Endogenous	1	3	43	22	15.8355	1	1	151258	FALSE	0.46453	5.64706	-0.478858	5.56911	-2.2285	0.0312313	0.404706	-3.65549	5.24209	5.79802
GTF3C5	All Targets	RNA	Endogenous	1	1	57	18	16.2766	1	1	9328	FALSE	0.0124838	5.6878	-0.442333	5.62322	-2.22769	0.0312895	0.404878	-3.665	5.3834	5.79109
CD9	All Targets	RNA	Endogenous	1	10	237	42	43.7819	1	1	928	FALSE	-0.1349	7.0258	-0.453182	6.99677	-2.22903	0.0312895	0.404878	-3.71453	6.75335	7.16716
ADPRH	All Targets	RNA	Endogenous	1	7	54	26	21.4887	1	1	141	FALSE	-0.125363	6.04629	0.390716	5.98072	2.22652	0.031374	0.405681	-3.75071	6.20633	5.8228
TSR2	All Targets	RNA	Endogenous	1	2	54	14	14.8537	1	1	90121	FALSE	0.140011	5.56146	-0.42438	5.48148	-2.22566	0.0314357	0.405946	-3.65801	5.2232	5.66227
ZFP30	All Targets	RNA	Endogenous	1	4	44	18	16.1825	1	1	22835	FALSE	-0.140779	5.67227	-0.450788	5.59007	-2.22505	0.0314799	0.405946	-3.66116	5.31346	5.7837
CCL21	All Targets	RNA	Endogenous	1	1	34	18	11.9216	1	1	6366	FALSE	0.507016	5.30057	-0.512093	5.20377	-2.22872	0.0314832	0.405946	-3.65971	4.82782	5.46694
ZSCAN22	All Targets	RNA	Endogenous	1	1	39	18	13.7798	1	1	342945	FALSE	-0.0946587	5.48243	-0.41515	5.4042	-2.22499	0.0314846	0.405946	-3.6808	5.13587	5.59203
SAMD14	All Targets	RNA	Endogenous	1	1	29	17	10.2116	1	1	201191	FALSE	0.21381	5.09117	-0.460073	4.97442	-2.22439	0.0315278	0.406087	-3.63244	4.67505	5.18397
NME5	All Targets	RNA	Endogenous	1	3	38	19	14.7403	1	1	8382	FALSE	0.101022	5.5495	-0.44391	5.46456	-2.22421	0.0315405	0.406087	-3.6586	5.18967	5.65699
ARPC5	All Targets	RNA	Endogenous	1	5	103	28	23.7524	1	1	10092	FALSE	0.0789508	6.18431	0.446524	6.12586	2.22324	0.0316108	0.406702	-3.71628	6.38416	5.94505
BRPF3	All Targets	RNA	Endogenous	1	3	47	19	16.837	1	1	27154	FALSE	0.0576752	5.72261	-0.436082	5.6514	-2.22226	0.0316818	0.407324	-3.66873	5.39334	5.83203
GALNT5	All Targets	RNA	Endogenous	1	4	46	15	14.602	1	1	11227	FALSE	0.800923	5.53956	0.528682	5.44507	2.233	0.0317363	0.407734	-3.66515	5.7331	5.24344
FAM240C	All Targets	RNA	Endogenous	1	2	53	25	18.2391	1	1	285095	FALSE	0.455555	5.83458	-0.483366	5.76194	-2.22233	0.0317956	0.408206	-3.69059	5.49579	5.94825
SCNN1B	All Targets	RNA	Endogenous	1	2	47	20	16.2851	1	1	6338	FALSE	0.364462	5.68381	-0.443428	5.60719	-2.21906	0.0319154	0.408819	-3.68557	5.31285	5.81323
TRMT44	All Targets	RNA	Endogenous	1	1	37	20	15.0424	1	1	152992	FALSE	-0.132653	5.58663	-0.433467	5.50513	-2.21853	0.0319544	0.408819	-3.70298	5.26495	5.67325
UBA6	All Targets	RNA	Endogenous	1	3	56	23	20.5512	1	1	55236	FALSE	0.256952	5.9877	-0.386242	5.92571	-2.21847	0.0319587	0.408819	-3.71572	5.69548	6.08686
GGT5	All Targets	RNA	Endogenous	1	3	38	12	12.1238	1	1	2687	FALSE	0.435732	5.30279	0.516173	5.19085	2.22655	0.0319632	0.408819	-3.67685	5.57365	4.9229
LTBR	All Targets	RNA	Endogenous	1	5	57	17	18.1721	1	1	4055	FALSE	-0.362018	5.82538	0.422542	5.74673	2.21832	0.0319691	0.408819	-3.73073	6.00293	5.5674
ZNF337	All Targets	RNA	Endogenous	1	6	47	16	14.6561	1	1	26152	FALSE	-0.184845	5.53956	0.409678	5.44745	2.21777	0.0320096	0.408819	-3.70073	5.70725	5.26559
NF1	All Targets	RNA	Endogenous	1	3	55	24	21.1524	1	1	4763	FALSE	-0.0571903	6.02537	-0.409134	5.96751	-2.21748	0.0320313	0.408819	-3.70643	5.71032	6.14755
ZFP2	All Targets	RNA	Endogenous	1	1	31	16	11.3144	1	1	80108	FALSE	0.205188	5.2182	-0.473107	5.11369	-2.21731	0.0320438	0.408819	-3.65787	4.8298	5.31241
FAM222B	All Targets	RNA	Endogenous	1	2	40	21	15.6724	1	1	55731	FALSE	-0.215481	5.6323	-0.446287	5.55538	-2.21689	0.0320742	0.408819	-3.66989	5.27288	5.75314
NFIB	All Targets	RNA	Endogenous	1	5	47	26	18.4564	1	1	4781	FALSE	-0.229806	5.84397	-0.426622	5.77526	-2.21661	0.0320952	0.408819	-3.67809	5.50295	5.96588
ANKDD1B	All Targets	RNA	Endogenous	1	2	36	21	16.4016	1	1	728780	FALSE	-0.148391	5.69535	0.401557	5.61298	2.21655	0.0320995	0.408819	-3.72486	5.81724	5.47
PLD1	All Targets	RNA	Endogenous	1	2	33	16	12.0201	1	1	5337	FALSE	0.0922284	5.30007	-0.439643	5.1904	-2.21613	0.0321299	0.408819	-3.66272	4.9683	5.34586
FCER2	All Targets	RNA	Endogenous	1	4	39	23	17.5573	1	1	2208	FALSE	-0.710129	5.77769	-0.419154	5.70152	-2.21574	0.0321591	0.408819	-3.68897	5.45506	5.87404
PLA2G4B	All Targets	RNA	Endogenous	1	1	32	14	11.865	1	1	100137049	FALSE	0.335913	5.28064	-0.443055	5.17801	-2.21561	0.0321687	0.408819	-3.68013	4.93881	5.34545
DGKI	All Targets	RNA	Endogenous	1	5	50	17	16.7366	1	1	9162	FALSE	-0.346201	5.7151	0.413841	5.63165	2.2151	0.0322057	0.408819	-3.73341	5.86453	5.46863
SAV1	All Targets	RNA	Endogenous	1	4	60	18	17.5637	1	1	60485	FALSE	-0.651062	5.77941	-0.451026	5.7078	-2.21505	0.0322099	0.408819	-3.67641	5.44287	5.89324
CERS5	All Targets	RNA	Endogenous	1	2	48	19	16.9247	1	1	91012	FALSE	-0.353501	5.73374	-0.422217	5.6673	-2.21479	0.0322287	0.408819	-3.69365	5.40192	5.85306
PODXL	All Targets	RNA	Endogenous	1	5	83	16	17.75	1	1	5420	FALSE	-0.867829	5.79469	0.430563	5.718	2.21382	0.0323003	0.409225	-3.69643	5.9762	5.53726
SORBS2	All Targets	RNA	Endogenous	1	1	62	20	13.3183	1	1	8470	FALSE	0.333967	5.44106	-0.468038	5.35348	-2.21347	0.0323265	0.409225	-3.66588	5.07993	5.54496
DGKE	All Targets	RNA	Endogenous	1	1	33	18	12.7982	1	1	8526	FALSE	-0.375804	5.38552	0.438253	5.28278	2.21344	0.0323287	0.409225	-3.69817	5.60252	5.05896
NOC4L	All Targets	RNA	Endogenous	1	1	49	17	12.4993	1	1	79050	FALSE	0.562481	5.354	-0.549851	5.25831	-2.21885	0.0324001	0.409633	-3.64961	4.96549	5.46329
TIMM17B	All Targets	RNA	Endogenous	1	4	51	19	17.1222	1	1	10245	FALSE	-0.0300581	5.74593	0.441453	5.66869	2.21239	0.0324063	0.409633	-3.7171	5.9132	5.49753
MYO15B	All Targets	RNA	Endogenous	1	1	62	26	19.8479	1	1	80022	FALSE	-0.211656	5.95079	-0.413996	5.89581	-2.21112	0.0325008	0.410489	-3.72504	5.6475	6.06962
CHFR	All Targets	RNA	Endogenous	1	1	39	14	10.4451	1	1	55743	FALSE	-0.194173	5.11478	-0.458798	5.00928	-2.2095	0.032621	0.410489	-3.65341	4.81334	5.14644
POC1A	All Targets	RNA	Endogenous	1	3	33	12	11.4892	1	1	25886	FALSE	-0.0441688	5.23275	0.456529	5.11815	2.20929	0.0326367	0.410489	-3.68301	5.32337	4.97449
C12orf57	All Targets	RNA	Endogenous	1	5	71	27	25.5877	1	1	113246	FALSE	-0.562399	6.28044	0.369007	6.22999	2.20923	0.0326415	0.410489	-3.75748	6.44127	6.08209
KIAA1210	All Targets	RNA	Endogenous	1	5	62	19	16.8142	1	1	57481	FALSE	0.117118	5.72197	0.422286	5.64091	2.20907	0.0326534	0.410489	-3.73599	5.86684	5.48276
ETV3L	All Targets	RNA	Endogenous	1	4	37	12	13.1785	1	1	440695	FALSE	-0.195118	5.40635	0.432775	5.30288	2.20898	0.0326602	0.410489	-3.70758	5.51822	5.15215
MEF2D	All Targets	RNA	Endogenous	1	4	85	22	19.4267	1	1	4209	FALSE	0.485004	5.91642	-0.476901	5.85029	-2.20857	0.0326908	0.410489	-3.67978	5.6087	6.01941
GALK2	All Targets	RNA	Endogenous	1	1	57	16	13.9322	1	1	2585	FALSE	-0.233475	5.48644	-0.442736	5.40455	-2.20853	0.0326933	0.410489	-3.67639	5.14841	5.58385
TRAF1	All Targets	RNA	Endogenous	1	6	88	16	19.112	1	1	7185	FALSE	0.449356	5.891	0.406664	5.817	2.20852	0.0326944	0.410489	-3.75897	6.06857	5.6409
OR1K1	All Targets	RNA	Endogenous	1	2	38	15	13.8232	1	1	392392	FALSE	0.118551	5.471	-0.446513	5.37528	-2.20842	0.0327016	0.410489	-3.69168	5.12157	5.55287
VEGFB	All Targets	RNA	Endogenous	1	6	67	24	23.1457	1	1	7423	FALSE	0.0606487	6.14769	0.412914	6.08796	2.20603	0.032881	0.412453	-3.75895	6.33681	5.91377
NLRP1	All Targets	RNA	Endogenous	1	1	44	18	14.9537	1	1	22861	FALSE	0.526491	5.57815	-0.463267	5.49988	-2.20557	0.0329154	0.412597	-3.70862	5.24491	5.67836
TNIP3	All Targets	RNA	Endogenous	1	3	33	16	14.6846	1	1	79931	FALSE	-0.0689878	5.5455	0.399286	5.44994	2.20522	0.0329414	0.412637	-3.74257	5.66063	5.30246
C3orf14	All Targets	RNA	Endogenous	1	3	40	20	15.8139	1	1	57415	FALSE	0.190182	5.6395	-0.435505	5.56131	-2.20396	0.0330364	0.413269	-3.69459	5.30582	5.74016
OGT	All Targets	RNA	Endogenous	1	3	56	20	14.7188	1	1	8473	FALSE	-0.334083	5.54578	-0.441599	5.46369	-2.20339	0.0330797	0.413269	-3.68487	5.19658	5.65066
CD160	All Targets	RNA	Endogenous	1	2	42	20	15.4967	1	1	11126	FALSE	0.779791	5.61783	-0.478493	5.53787	-2.20324	0.0330907	0.413269	-3.69816	5.24266	5.74451
DLD	All Targets	RNA	Endogenous	1	6	60	20	17.7898	1	1	1738	FALSE	-0.0447329	5.79491	0.391168	5.71797	2.20305	0.0331049	0.413269	-3.76733	5.96642	5.54406
ART1	All Targets	RNA	Endogenous	1	2	40	22	17.007	1	1	417	FALSE	-0.0337691	5.74039	-0.418459	5.6676	-2.20269	0.0331322	0.413269	-3.71926	5.40764	5.84958
ENTPD3	All Targets	RNA	Endogenous	1	1	43	20	15.1597	1	1	956	FALSE	0.121861	5.59729	-0.418715	5.52185	-2.20245	0.0331508	0.413269	-3.72274	5.24115	5.71833
BMPR2	All Targets	RNA	Endogenous	1	5	56	25	20.4972	1	1	659	FALSE	0.170646	5.98244	0.396896	5.91757	2.20226	0.0331649	0.413269	-3.76341	6.16424	5.74491
ZNF569	All Targets	RNA	Endogenous	1	1	48	24	17.1715	1	1	148266	FALSE	0.421555	5.76145	-0.477832	5.69244	-2.20428	0.0331887	0.413269	-3.73327	5.39612	5.89987
MRPL30	All Targets	RNA	Endogenous	1	1	38	20	14.4884	1	1	51263	FALSE	-0.171289	5.53706	-0.410148	5.46168	-2.20169	0.033208	0.413269	-3.71699	5.21455	5.63467
DDA1	All Targets	RNA	Endogenous	1	4	56	15	14.2688	1	1	79016	FALSE	-0.0635655	5.50926	0.434103	5.4186	2.20123	0.0332432	0.413269	-3.70173	5.65066	5.25617
CAPG	All Targets	RNA	Endogenous	1	7	54	21	18.6796	1	1	822	FALSE	0.204285	5.85898	0.411035	5.78388	2.20122	0.0332439	0.413269	-3.77532	6.01142	5.62461
MIOS	All Targets	RNA	Endogenous	1	1	51	24	17.3219	1	1	54468	FALSE	-0.223239	5.76887	-0.415097	5.70563	-2.20016	0.033324	0.413949	-3.72891	5.44875	5.88544
NUDT14	All Targets	RNA	Endogenous	1	3	44	22	17.0881	1	1	256281	FALSE	0.135471	5.74292	0.390783	5.66532	2.19979	0.0333521	0.413949	-3.75742	5.90228	5.49945
HIP1R	All Targets	RNA	Endogenous	1	2	34	18	14.3906	1	1	9026	FALSE	0.502514	5.52282	-0.437932	5.43502	-2.19948	0.033376	0.413949	-3.71823	5.20183	5.59826
TARS1	All Targets	RNA	Endogenous	1	3	39	13	10.6951	1	1	6897	FALSE	-0.0536169	5.1427	0.477552	5.02199	2.19876	0.0334304	0.413949	-3.6772	5.26822	4.84963
RHOT1	All Targets	RNA	Endogenous	1	5	55	20	16.8884	1	1	55288	FALSE	-0.120859	5.72613	0.433359	5.6468	2.19872	0.0334336	0.413949	-3.74169	5.92327	5.45327
RASGEF1A	All Targets	RNA	Endogenous	1	1	55	23	15.814	1	1	221002	FALSE	0.496659	5.6643	-0.442419	5.60116	-2.19869	0.0334363	0.413949	-3.72536	5.31954	5.79829
LSAMP	All Targets	RNA	Endogenous	1	3	50	23	15.5162	1	1	4045	FALSE	0.457092	5.61822	-0.478031	5.54032	-2.19677	0.0335823	0.415471	-3.70518	5.24535	5.74679
CCDC192	All Targets	RNA	Endogenous	1	3	42	22	15.1166	1	1	728586	FALSE	-0.747452	5.58208	-0.436503	5.50035	-2.19636	0.0336139	0.415578	-3.70732	5.19899	5.7113
MUC16	All Targets	RNA	Endogenous	1	4	47	20	18.3813	1	1	94025	FALSE	0.343909	5.83982	0.399546	5.76368	2.19551	0.0336789	0.416096	-3.79107	6.00289	5.59624
WDR7	All Targets	RNA	Endogenous	1	2	41	17	13.7772	1	1	23335	FALSE	-0.225838	5.46239	-0.411887	5.38165	-2.19456	0.0337523	0.41627	-3.71471	5.12134	5.56387
ADGRL3	All Targets	RNA	Endogenous	1	3	56	20	16.6709	1	1	23284	FALSE	0.00198369	5.70822	-0.430279	5.63542	-2.19448	0.0337581	0.41627	-3.71009	5.38074	5.81369
ALOX15B	All Targets	RNA	Endogenous	1	3	40	18	15.5902	1	1	247	FALSE	0.173419	5.6276	-0.51808	5.53882	-2.20083	0.0337622	0.41627	-3.71019	5.31603	5.69478
OR6C4	All Targets	RNA	Endogenous	1	1	47	15	12.3283	1	1	341418	FALSE	0.304654	5.32582	-0.460888	5.23858	-2.19352	0.0338324	0.41685	-3.7115	4.99411	5.40971
GHR	All Targets	RNA	Endogenous	1	1	42	16	11.2783	1	1	2690	FALSE	0.961436	5.21922	-0.511113	5.12046	-2.19253	0.034007	0.417337	-3.70484	4.82867	5.32472
OCIAD1	All Targets	RNA	Endogenous	1	6	93	33	26.9031	1	1	54940	FALSE	-0.580369	6.35007	0.421299	6.30088	2.19109	0.0340193	0.417337	-3.8071	6.55754	6.12121
AKR1A1	All Targets	RNA	Endogenous	1	5	53	12	16.0968	1	1	10327	FALSE	-0.0188366	5.66575	0.438123	5.57995	2.19046	0.0340688	0.417337	-3.75878	5.82747	5.40668
DUSP10	All Targets	RNA	Endogenous	1	2	55	19	16.5194	1	1	11221	FALSE	-0.00520859	5.70241	0.426262	5.62542	2.19031	0.0340797	0.417337	-3.77728	5.89427	5.43722
CADM1	All Targets	RNA	Endogenous	1	8	67	37	26.1876	1	1	23705	FALSE	-0.204934	6.31267	0.39818	6.26122	2.18962	0.0341333	0.417337	-3.81914	6.4943	6.09806
MED15	All Targets	RNA	Endogenous	1	6	55	24	20.2202	1	1	51586	FALSE	0.0736646	5.96665	0.418388	5.89637	2.18957	0.0341377	0.417337	-3.81551	6.16142	5.71084
SLC22A7	All Targets	RNA	Endogenous	1	3	48	18	14.6554	1	1	10864	FALSE	0.16394	5.54209	-0.453217	5.45551	-2.18879	0.0341979	0.417337	-3.7048	5.20062	5.63393
PHACTR2	All Targets	RNA	Endogenous	1	1	39	17	14.72	1	1	9749	FALSE	0.324908	5.56261	-0.45437	5.47981	-2.18875	0.0342009	0.417337	-3.74816	5.15023	5.71052
HYAL3	All Targets	RNA	Endogenous	1	4	45	27	19.3194	1	1	8372	FALSE	-1.02478	5.90442	-0.406146	5.83584	-2.18857	0.0342154	0.417337	-3.75193	5.60228	5.99934
CD207	All Targets	RNA	Endogenous	1	2	35	11	12.0424	1	1	50489	FALSE	0.363182	5.29428	-0.45997	5.18386	-2.18855	0.0342163	0.417337	-3.7139	4.92939	5.36199
SLC27A4	All Targets	RNA	Endogenous	1	2	61	28	20.5909	1	1	10999	FALSE	0.509706	5.9966	-0.433943	5.93454	-2.18811	0.034251	0.417337	-3.76346	5.63065	6.14727
SLC25A40	All Targets	RNA	Endogenous	1	1	56	20	13.6836	1	1	55972	FALSE	-0.837146	5.46881	-0.442484	5.38538	-2.18808	0.0342533	0.417337	-3.72112	5.06929	5.60664
DNAH10	All Targets	RNA	Endogenous	1	3	49	23	19.0148	1	1	196385	FALSE	-0.569337	5.88326	-0.425308	5.81705	-2.18806	0.0342552	0.417337	-3.75264	5.5658	5.99292
IQGAP3	All Targets	RNA	Endogenous	1	3	43	20	13.8661	1	1	128239	FALSE	0.187137	5.47517	-0.424488	5.37893	-2.18794	0.034264	0.417337	-3.73011	5.12821	5.55443
INPP5J	All Targets	RNA	Endogenous	1	2	51	21	14.7956	1	1	27124	FALSE	0.157359	5.56156	-0.491959	5.48129	-2.18763	0.0342883	0.417337	-3.70876	5.23005	5.65716
AGT	All Targets	RNA	Endogenous	1	1	31	17	12.619	1	1	183	FALSE	0.271356	5.3574	-0.428208	5.27107	-2.1874	0.0343062	0.417337	-3.73358	5.00725	5.45575
PRDM13	All Targets	RNA	Endogenous	1	5	47	20	19.158	1	1	59336	FALSE	-0.300366	5.89603	0.378981	5.81884	2.18736	0.0343092	0.417337	-3.81239	6.04463	5.66079
DFFA	All Targets	RNA	Endogenous	1	3	47	26	18.0592	1	1	1676	FALSE	-0.642917	5.81444	-0.420247	5.74675	-2.18721	0.0343209	0.417337	-3.73724	5.47859	5.93445
RAD51C	All Targets	RNA	Endogenous	1	7	62	21	21.9721	1	1	5889	FALSE	0.215094	6.0762	0.374988	6.0136	2.18708	0.0343315	0.417337	-3.82008	6.23067	5.86165
THADA	All Targets	RNA	Endogenous	1	4	44	13	12.5169	1	1	63892	FALSE	-0.848893	5.33534	0.416598	5.23474	2.18704	0.0343347	0.417337	-3.72154	5.4581	5.07839
TAAR9	All Targets	RNA	Endogenous	1	2	41	23	14.5877	1	1	134860	FALSE	0.038046	5.53772	-0.432488	5.45276	-2.18596	0.0344187	0.417519	-3.73202	5.198	5.6311
PLEKHH2	All Targets	RNA	Endogenous	1	1	46	9	9.32644	1	1	130271	FALSE	0.209156	5.00436	-0.558652	4.8728	-2.1908	0.0344972	0.417519	-3.68299	4.54989	5.09883
KCTD8	All Targets	RNA	Endogenous	1	2	30	14	10.8703	1	1	386617	FALSE	-0.252047	5.16052	-0.46251	5.04889	-2.1846	0.0345254	0.417519	-3.70798	4.72698	5.27423
LRRC1	All Targets	RNA	Endogenous	1	3	47	20	16.112	1	1	55227	FALSE	0.197052	5.6635	-0.425409	5.58971	-2.1844	0.0345405	0.417519	-3.7349	5.3633	5.7482
TULP4	All Targets	RNA	Endogenous	1	4	40	15	14.181	1	1	56995	FALSE	0.305389	5.49904	0.439169	5.40275	2.18424	0.0345536	0.417519	-3.75514	5.68695	5.20381
MFSD14B	All Targets	RNA	Endogenous	1	6	49	29	19.7635	1	1	84641	FALSE	0.0921644	5.93518	0.403205	5.86608	2.18423	0.0345542	0.417519	-3.80821	6.12662	5.6837
KRT10	All Targets	RNA	Endogenous	1	7	44	22	18.3419	1	1	3858	FALSE	0.222512	5.83757	0.417855	5.75786	2.18401	0.0345716	0.417519	-3.81508	6.00299	5.58626
EIF5AL1	All Targets	RNA	Endogenous	1	3	41	13	12.2604	1	1	143244	FALSE	0.0871772	5.31421	0.429206	5.20598	2.18376	0.0345914	0.417519	-3.7462	5.4522	5.03362
FAM71B	All Targets	RNA	Endogenous	1	1	48	16	13.9244	1	1	153745	FALSE	-0.0116745	5.4855	-0.4566	5.39823	-2.18334	0.0346238	0.417519	-3.74071	5.11914	5.5936
GRIN3A	All Targets	RNA	Endogenous	1	2	38	14	10.91	1	1	116443	FALSE	0.403096	5.1735	-0.495639	5.0632	-2.18315	0.0346391	0.417519	-3.69298	4.75445	5.27932
AK5	All Targets	RNA	Endogenous	1	1	39	20	14.0059	1	1	26289	FALSE	0.279541	5.49083	-0.445298	5.40872	-2.18289	0.0346594	0.417519	-3.74189	5.15738	5.58466
HLA-DQB1	All Targets	RNA	Endogenous	1	8	90	29	25.2611	1	1	3119	FALSE	-0.223667	6.26314	0.380997	6.21031	2.18286	0.0346615	0.417519	-3.81788	6.43193	6.05518
DET1	All Targets	RNA	Endogenous	1	1	50	17	12.4893	1	1	55070	FALSE	0.0800145	5.34761	-0.480936	5.25937	-2.18285	0.0346625	0.417519	-3.71959	4.97628	5.45753
ELAC1	All Targets	RNA	Endogenous	1	6	33	22	17.357	1	1	55520	FALSE	0.234314	5.76256	0.396554	5.68073	2.18249	0.0346908	0.417519	-3.80866	5.89758	5.52894
COL13A1	All Targets	RNA	Endogenous	1	3	48	18	16.517	1	1	1305	FALSE	-0.263326	5.70598	0.461485	5.62222	2.18444	0.0347065	0.417519	-3.78251	5.92654	5.4092
PRRC2B	All Targets	RNA	Endogenous	1	2	52	22	18.3644	1	1	84726	FALSE	-0.33624	5.83821	-0.399566	5.77557	-2.18184	0.0347425	0.417519	-3.75738	5.53809	5.94181
SACM1L	All Targets	RNA	Endogenous	1	1	47	12	14.001	1	1	22908	FALSE	0.604743	5.49417	-0.477887	5.41127	-2.18183	0.0347431	0.417519	-3.72579	5.14457	5.59797
LRIT3	All Targets	RNA	Endogenous	1	1	48	13	12.6537	1	1	345193	FALSE	0.904582	5.36654	-0.528308	5.27625	-2.18674	0.0348145	0.417807	-3.71797	4.94611	5.50734
GTPBP10	All Targets	RNA	Endogenous	1	2	57	16	15.646	1	1	85865	FALSE	-0.506598	5.62954	-0.453652	5.5544	-2.18092	0.0348146	0.417807	-3.74413	5.27137	5.75252
PDHA1	All Targets	RNA	Endogenous	1	2	47	18	16.1113	1	1	5160	FALSE	-0.134809	5.66525	-0.41919	5.59518	-2.18062	0.0348387	0.417807	-3.74349	5.33967	5.77404
PPP4C	All Targets	RNA	Endogenous	1	5	64	16	16.6592	1	1	5531	FALSE	-0.54904	5.70669	0.393083	5.62872	2.18035	0.0348597	0.417807	-3.76117	5.87153	5.45875
CCDC103	All Targets	RNA	Endogenous	1	2	48	23	14.8538	1	1	388389	FALSE	0.346021	5.56097	-0.458459	5.48251	-2.17911	0.0349577	0.418445	-3.74268	5.18333	5.69194
TRIM66	All Targets	RNA	Endogenous	1	3	49	18	17.4456	1	1	9866	FALSE	0.374265	5.77423	0.41879	5.6941	2.17888	0.0349763	0.418445	-3.80794	5.98132	5.49304
RMDN2	All Targets	RNA	Endogenous	1	1	50	16	13.0324	1	1	151393	FALSE	-0.0513738	5.41514	-0.444791	5.30743	-2.1785	0.0350061	0.418445	-3.76148	5.07659	5.46901
MYH8	All Targets	RNA	Endogenous	1	2	37	18	12.6258	1	1	4626	FALSE	-0.0481685	5.35358	-0.451861	5.25614	-2.17834	0.0350187	0.418445	-3.72164	4.98836	5.44358
GNAO1	All Targets	RNA	Endogenous	1	3	39	19	14.2982	1	1	2775	FALSE	-0.545459	5.51113	-0.41543	5.41912	-2.17821	0.035029	0.418445	-3.74368	5.15137	5.60656
AKT1S1	All Targets	RNA	Endogenous	1	2	34	18	12.4756	1	1	84335	FALSE	0.233708	5.33984	-0.479817	5.24373	-2.17753	0.0350836	0.418766	-3.72086	4.90298	5.48225
MSTN	All Targets	RNA	Endogenous	1	1	42	16	12.8092	1	1	2660	FALSE	0.112931	5.37738	-0.457942	5.28904	-2.17729	0.0351023	0.418766	-3.74757	5.005	5.48786
RPS25	All Targets	RNA	Endogenous	1	13	378	50	54.2277	1	1	6230	FALSE	0.0575949	7.32093	0.402975	7.29613	2.17647	0.0351676	0.41894	-3.84788	7.54191	7.12408
DTX1	All Targets	RNA	Endogenous	1	1	58	17	14.5855	1	1	1840	FALSE	0.514396	5.56141	0.425664	5.47383	2.17645	0.0351694	0.41894	-3.77616	5.77547	5.26267
LSM11	All Targets	RNA	Endogenous	1	3	63	19	14.0276	1	1	134353	FALSE	0.0325655	5.48636	-0.480772	5.40305	-2.176	0.035205	0.41894	-3.73208	5.12314	5.59899
MAL2	All Targets	RNA	Endogenous	1	5	32	11	12.6426	1	1	114569	FALSE	0.352734	5.35618	0.472505	5.2405	2.17689	0.0352128	0.41894	-3.76803	5.58121	5.002
SPANXN3	All Targets	RNA	Endogenous	1	4	38	15	14.8944	1	1	139067	FALSE	-0.449259	5.5642	-0.466372	5.47333	-2.17565	0.035233	0.41894	-3.748	5.26217	5.62115
GCAT	All Targets	RNA	Endogenous	1	1	42	17	13.2368	1	1	23464	FALSE	-0.462252	5.42443	-0.450542	5.33746	-2.17454	0.0353221	0.419628	-3.74671	5.02491	5.55626
ORC5	All Targets	RNA	Endogenous	1	2	40	17	12.8673	1	1	5001	FALSE	-0.117445	5.37871	-0.473652	5.28048	-2.1743	0.0353408	0.419628	-3.73462	4.92117	5.53199
ENDOG	All Targets	RNA	Endogenous	1	2	56	18	15.9415	1	1	2021	FALSE	0.038811	5.65473	-0.410667	5.57875	-2.17406	0.0353606	0.419628	-3.75159	5.31755	5.76159
FOXD2	All Targets	RNA	Endogenous	1	5	49	24	22.3312	1	1	2306	FALSE	-0.289059	6.10304	0.383559	6.03427	2.17263	0.0354749	0.419728	-3.85227	6.26021	5.87611
HOXA1	All Targets	RNA	Endogenous	1	2	42	19	14.2427	1	1	3198	FALSE	-0.126552	5.5062	-0.448133	5.42548	-2.17236	0.0354969	0.419728	-3.75487	5.19349	5.58787
LDHD	All Targets	RNA	Endogenous	1	2	34	14	11.3038	1	1	197257	FALSE	-0.0719113	5.20979	-0.416801	5.10133	-2.17196	0.0355284	0.419728	-3.74858	4.86423	5.2673
HNF1B	All Targets	RNA	Endogenous	1	1	34	16	11.0957	1	1	6928	FALSE	0.200239	5.19728	-0.46769	5.08983	-2.17152	0.0355645	0.419728	-3.72642	4.75821	5.32197
SGCG	All Targets	RNA	Endogenous	1	1	49	18	15.1274	1	1	6445	FALSE	0.217057	5.59214	-0.430386	5.51315	-2.17128	0.0355838	0.419728	-3.77426	5.27538	5.6796
AOPEP	All Targets	RNA	Endogenous	1	2	48	18	15.0406	1	1	84909	FALSE	-0.510414	5.57679	-0.441412	5.49693	-2.17077	0.0356246	0.419728	-3.74809	5.22413	5.68789
DSG4	All Targets	RNA	Endogenous	1	2	47	25	16.1561	1	1	147409	FALSE	-0.0299476	5.6696	-0.418802	5.59583	-2.17056	0.0356418	0.419728	-3.77108	5.34917	5.76849
MAN2C1	All Targets	RNA	Endogenous	1	7	45	20	18.2484	1	1	4123	FALSE	-0.621254	5.82729	0.354074	5.7501	2.17039	0.0356555	0.419728	-3.83879	5.96493	5.59972
TACC1	All Targets	RNA	Endogenous	1	4	121	33	27.3024	1	1	6867	FALSE	0.31635	6.37317	-0.464026	6.33032	-2.1703	0.0356625	0.419728	-3.77639	6.04543	6.52974
EFHB	All Targets	RNA	Endogenous	1	2	37	12	10.3421	1	1	151651	FALSE	0.601055	5.10277	-0.514626	4.98884	-2.17127	0.0356627	0.419728	-3.72823	4.6952	5.1944
HEXB	All Targets	RNA	Endogenous	1	5	64	17	17.6186	1	1	3074	FALSE	-0.089281	5.78088	0.402956	5.70477	2.16969	0.035712	0.419728	-3.80392	5.96375	5.52349
ESM1	All Targets	RNA	Endogenous	1	3	40	19	17.5665	1	1	11082	FALSE	0.259664	5.78068	0.3812	5.70189	2.16955	0.0357228	0.419728	-3.83081	5.92994	5.54225
INSRR	All Targets	RNA	Endogenous	1	2	40	12	10.9774	1	1	3645	FALSE	-0.0392442	5.18542	-0.449872	5.05724	-2.16949	0.0357282	0.419728	-3.7289	4.79414	5.2414
ACTRT3	All Targets	RNA	Endogenous	1	2	41	16	14.6603	1	1	84517	FALSE	-0.0332929	5.54177	-0.396747	5.46176	-2.16878	0.0357852	0.419728	-3.77111	5.23513	5.62039
TNPO2	All Targets	RNA	Endogenous	1	2	43	22	12.5837	1	1	30000	FALSE	0.380098	5.35133	-0.482681	5.26228	-2.16874	0.0357882	0.419728	-3.73826	5.00808	5.44023
RPL26	All Targets	RNA	Endogenous	1	8	509	41	51.4885	1	1	6154	FALSE	0.588483	7.25319	0.421727	7.22545	2.16996	0.0357911	0.419728	-3.85474	7.52668	7.01459
CEP19	All Targets	RNA	Endogenous	1	4	39	16	15.0741	1	1	84984	FALSE	0.172669	5.578	0.4144	5.48751	2.16866	0.0357946	0.419728	-3.80437	5.72913	5.31837
FOXO4	All Targets	RNA	Endogenous	1	1	42	22	16.7307	1	1	4303	FALSE	-0.507946	5.72683	-0.436972	5.65491	-2.16846	0.0358114	0.419728	-3.79543	5.3647	5.85806
PPP1R27	All Targets	RNA	Endogenous	1	2	50	14	12.6018	1	1	116729	FALSE	-0.00075439	5.35006	-0.442803	5.25534	-2.16816	0.0358355	0.419728	-3.73498	4.95495	5.46562
NYAP1	All Targets	RNA	Endogenous	1	6	76	18	19.4212	1	1	222950	FALSE	-0.282747	5.91208	0.39353	5.84247	2.16805	0.0358444	0.419728	-3.81734	6.09017	5.66909
HTR3E	All Targets	RNA	Endogenous	1	1	31	15	10.1154	1	1	285242	FALSE	0.367686	5.08898	-0.526023	4.97614	-2.17448	0.0358682	0.419728	-3.74479	4.63665	5.21377
TUBGCP2	All Targets	RNA	Endogenous	1	3	63	20	16.1984	1	1	10844	FALSE	0.10583	5.67225	-0.412801	5.59484	-2.16745	0.0358933	0.419728	-3.76945	5.3603	5.75902
RAI2	All Targets	RNA	Endogenous	1	3	35	15	13.2656	1	1	10742	FALSE	0.0960524	5.41348	0.400493	5.31239	2.16731	0.0359043	0.419728	-3.79132	5.59026	5.11788
LYSMD3	All Targets	RNA	Endogenous	1	6	64	23	22.9176	1	1	116068	FALSE	0.574072	6.13586	0.385959	6.07291	2.16674	0.0359505	0.419996	-3.87549	6.30609	5.90968
NHP2	All Targets	RNA	Endogenous	1	6	84	30	26.4574	1	1	55651	FALSE	-0.214209	6.32677	0.378434	6.27707	2.16604	0.0360079	0.420395	-3.85668	6.51324	6.11175
CIAO2A	All Targets	RNA	Endogenous	1	4	60	16	15.1143	1	1	84191	FALSE	-0.0444428	5.5809	0.431909	5.49501	2.16549	0.0360525	0.42055	-3.78849	5.79487	5.28511
RIPPLY1	All Targets	RNA	Endogenous	1	3	34	12	11.567	1	1	92129	FALSE	-0.297951	5.24333	0.455184	5.12723	2.16459	0.0361259	0.42055	-3.76833	5.49995	4.86633
CNNM3	All Targets	RNA	Endogenous	1	6	59	24	23.2515	1	1	26505	FALSE	0.0586525	6.1516	0.37159	6.09338	2.16435	0.0361452	0.42055	-3.86168	6.31638	5.93728
ECT2L	All Targets	RNA	Endogenous	1	2	37	18	14.9916	1	1	345930	FALSE	0.270283	5.57505	-0.46333	5.4937	-2.16429	0.0361501	0.42055	-3.77732	5.16596	5.72312
WNT5B	All Targets	RNA	Endogenous	1	2	65	17	16.6596	1	1	81029	FALSE	0.0135014	5.71236	-0.418939	5.64148	-2.16419	0.0361587	0.42055	-3.78978	5.42021	5.79637
LHFPL1	All Targets	RNA	Endogenous	1	2	44	16	14.5062	1	1	340596	FALSE	0.731015	5.53831	-0.467799	5.46082	-2.16387	0.0361849	0.42055	-3.7822	5.14372	5.68279
PRAME	All Targets	RNA	Endogenous	1	4	42	15	13.164	1	1	23532	FALSE	0.713402	5.41747	-0.461246	5.30233	-2.16285	0.0362684	0.42055	-3.75783	5.03059	5.49255
TOX	All Targets	RNA	Endogenous	1	2	78	17	16.0325	1	1	9760	FALSE	-0.294039	5.66308	-0.484658	5.59205	-2.16207	0.036332	0.42055	-3.75792	5.32846	5.77656
RFX3	All Targets	RNA	Endogenous	1	7	53	22	20.9712	1	1	5991	FALSE	-0.216166	6.01233	0.374477	5.94843	2.16156	0.0363734	0.42055	-3.8493	6.16647	5.79579
TPH2	All Targets	RNA	Endogenous	1	2	53	22	16.5444	1	1	121278	FALSE	0.11406	5.70057	-0.425169	5.63222	-2.16153	0.0363762	0.42055	-3.78214	5.37442	5.81268
MAP3K6	All Targets	RNA	Endogenous	1	2	76	22	16.9209	1	1	9064	FALSE	-0.0550764	5.72956	-0.42265	5.66317	-2.16138	0.0363886	0.42055	-3.77222	5.41173	5.83917
LPIN2	All Targets	RNA	Endogenous	1	3	73	18	17.0405	1	1	9663	FALSE	0.127654	5.74308	-0.439249	5.66897	-2.16126	0.0363982	0.42055	-3.76927	5.38587	5.86714
PAWR	All Targets	RNA	Endogenous	1	6	55	15	17.089	1	1	5074	FALSE	-0.0881952	5.74377	0.470551	5.66145	2.1658	0.0364075	0.42055	-3.81222	5.93405	5.47063
NME8	All Targets	RNA	Endogenous	1	2	44	13	11.4295	1	1	51314	FALSE	-0.0891262	5.22773	-0.483038	5.12475	-2.16097	0.0364225	0.42055	-3.73684	4.77545	5.36926
GDF11	All Targets	RNA	Endogenous	1	3	44	14	13.168	1	1	10220	FALSE	0.120126	5.40558	-0.454759	5.30728	-2.16067	0.036447	0.42055	-3.76462	5.0296	5.50166
SERPINH1	All Targets	RNA	Endogenous	1	6	56	19	17.9785	1	1	871	FALSE	-0.361883	5.80955	0.403263	5.73288	2.16058	0.0364543	0.42055	-3.8356	6.00021	5.54576
AGL	All Targets	RNA	Endogenous	1	4	53	20	15.5403	1	1	178	FALSE	-0.356238	5.61759	-0.435935	5.5383	-2.1603	0.0364777	0.42055	-3.75358	5.29454	5.70894
ZSWIM1	All Targets	RNA	Endogenous	1	1	55	17	14.3959	1	1	90204	FALSE	0.556595	5.52875	-0.467114	5.44845	-2.16023	0.0364829	0.42055	-3.78428	5.17716	5.63835
CCSER2	All Targets	RNA	Endogenous	1	5	49	26	19.8614	1	1	54462	FALSE	-0.263492	5.94195	0.372537	5.87253	2.15998	0.0365039	0.42055	-3.86625	6.12086	5.6987
SLN	All Targets	RNA	Endogenous	1	3	40	20	13.5547	1	1	6588	FALSE	-0.622912	5.43958	-0.437898	5.35103	-2.15968	0.0365288	0.42055	-3.75516	5.07599	5.54355
FAM71E2	All Targets	RNA	Endogenous	1	6	41	17	15.3831	1	1	284418	FALSE	-0.266855	5.60299	0.392054	5.51266	2.1596	0.0365351	0.42055	-3.81669	5.71759	5.36922
SPIN3	All Targets	RNA	Endogenous	1	5	40	17	15.616	1	1	169981	FALSE	-0.509245	5.62435	0.38937	5.53639	2.15954	0.0365401	0.42055	-3.82575	5.76394	5.3771
GGN	All Targets	RNA	Endogenous	1	3	37	13	12.2839	1	1	199720	FALSE	0.625571	5.31871	-0.471331	5.20933	-2.1591	0.036576	0.42055	-3.75844	4.93035	5.40461
MAPK11	All Targets	RNA	Endogenous	1	3	37	14	12.1322	1	1	5600	FALSE	-0.0847654	5.29975	-0.444507	5.19077	-2.15871	0.0366084	0.42055	-3.7604	4.94852	5.36035
ADGRB2	All Targets	RNA	Endogenous	1	2	25	13	11.4444	1	1	576	FALSE	0.84966	5.23851	0.48213	5.11869	2.16463	0.0366129	0.42055	-3.80734	5.42341	4.90539
EXOSC6	All Targets	RNA	Endogenous	1	9	181	34	42.1683	1	1	118460	FALSE	-0.385418	6.97365	0.373753	6.9392	2.15817	0.0366527	0.42055	-3.88964	7.11044	6.81933
IFRD2	All Targets	RNA	Endogenous	1	3	51	17	16.0337	1	1	7866	FALSE	0.353158	5.66103	0.408399	5.57637	2.1574	0.0367166	0.42055	-3.8362	5.83245	5.39711
OR51S1	All Targets	RNA	Endogenous	1	1	35	16	13.07	1	1	119692	FALSE	0.319023	5.41601	-0.455169	5.33112	-2.15687	0.0367606	0.42055	-3.80039	5.03512	5.53833
INTS10	All Targets	RNA	Endogenous	1	3	60	24	19.899	1	1	55174	FALSE	-0.289362	5.94561	-0.403913	5.88738	-2.15686	0.0367617	0.42055	-3.80642	5.62789	6.06902
FRAS1	All Targets	RNA	Endogenous	1	2	34	14	13.5624	1	1	80144	FALSE	0.127768	5.44347	-0.440569	5.34814	-2.15679	0.0367674	0.42055	-3.78827	5.14517	5.49022
SPTBN2	All Targets	RNA	Endogenous	1	1	36	20	13.8835	1	1	6712	FALSE	-0.462273	5.47735	-0.398813	5.39829	-2.15669	0.0367758	0.42055	-3.78936	5.14309	5.57693
HSP90B1	All Targets	RNA	Endogenous	1	4	55	20	16.1006	1	1	7184	FALSE	-0.714929	5.66212	0.394964	5.58066	2.15662	0.0367813	0.42055	-3.80208	5.78794	5.43556
PHRF1	All Targets	RNA	Endogenous	1	1	66	21	17.1468	1	1	57661	FALSE	0.490549	5.76086	-0.478136	5.69013	-2.16139	0.0368534	0.42055	-3.81318	5.41821	5.88048
TM4SF19	All Targets	RNA	Endogenous	1	3	49	18	15.569	1	1	116211	FALSE	-0.591138	5.61902	-0.425131	5.54187	-2.15532	0.036889	0.42055	-3.78137	5.27317	5.72997
ABCB7	All Targets	RNA	Endogenous	1	4	44	18	16.3923	1	1	22	FALSE	0.140228	5.68579	0.404606	5.60392	2.15474	0.0369376	0.42055	-3.83325	5.83368	5.44309
SNHG32	All Targets	RNA	Endogenous	1	8	82	26	24.6109	1	1	50854	FALSE	0.167539	6.22965	0.35141	6.17291	2.15449	0.0369582	0.42055	-3.87131	6.36966	6.03519
RGS16	All Targets	RNA	Endogenous	1	6	64	22	21.3667	1	1	6004	FALSE	0.486021	6.04042	0.424861	5.97481	2.15535	0.0369663	0.42055	-3.86772	6.24409	5.78631
GTF2H5	All Targets	RNA	Endogenous	1	1	48	29	17.4327	1	1	404672	FALSE	-0.129196	5.78041	-0.389911	5.71387	-2.15433	0.0369719	0.42055	-3.82484	5.47246	5.88286
SF1	All Targets	RNA	Endogenous	1	2	66	25	19.2317	1	1	7536	FALSE	0.0501012	5.90198	-0.416325	5.84276	-2.15432	0.0369727	0.42055	-3.80326	5.58204	6.02526
KLK2	All Targets	RNA	Endogenous	1	4	39	19	14.8429	1	1	3817	FALSE	0.560728	5.55877	-0.445265	5.47025	-2.15388	0.0370094	0.42055	-3.78602	5.23498	5.63493
PLA2G12A	All Targets	RNA	Endogenous	1	1	34	21	15.4247	1	1	81579	FALSE	0.475375	5.62165	-0.461286	5.54132	-2.15476	0.0370111	0.42055	-3.8132	5.23651	5.75469
PABPC5	All Targets	RNA	Endogenous	1	2	49	19	14.7422	1	1	140886	FALSE	0.0176475	5.55388	-0.443287	5.47746	-2.1535	0.0370408	0.42055	-3.79172	5.19224	5.67712
ARL11	All Targets	RNA	Endogenous	1	2	42	16	15.5598	1	1	115761	FALSE	0.509622	5.6264	-0.422333	5.54157	-2.15326	0.0370611	0.42055	-3.81358	5.27763	5.72633
TRIML1	All Targets	RNA	Endogenous	1	2	36	12	11.659	1	1	339976	FALSE	0.123101	5.25007	-0.472176	5.15007	-2.15316	0.0370688	0.42055	-3.76466	4.87992	5.33917
OR51L1	All Targets	RNA	Endogenous	1	1	45	15	13.6624	1	1	119682	FALSE	-0.244859	5.45885	-0.440613	5.37124	-2.15272	0.0371058	0.42055	-3.79905	5.14405	5.53027
C22orf39	All Targets	RNA	Endogenous	1	4	154	18	24.0744	1	1	128977	FALSE	0.133397	6.20936	0.435021	6.14969	2.15256	0.0371193	0.42055	-3.82949	6.39119	5.98065
COX5A	All Targets	RNA	Endogenous	1	1	66	17	13.1893	1	1	9377	FALSE	0.704293	5.423	-0.507108	5.33853	-2.15362	0.0371239	0.42055	-3.76657	4.9778	5.59105
DPYSL5	All Targets	RNA	Endogenous	1	2	46	14	12.8118	1	1	56896	FALSE	0.775554	5.37226	-0.492061	5.27855	-2.15274	0.0371403	0.42055	-3.77806	4.96406	5.49869
RPL18	All Targets	RNA	Endogenous	1	19	365	74	67.8847	1	1	6141	FALSE	0.204919	7.63466	0.389219	7.61452	2.1506	0.0372835	0.421866	-3.88817	7.85043	7.44938
SCX	All Targets	RNA	Endogenous	1	5	49	22	17.4839	1	1	642658	FALSE	-0.194969	5.77337	-0.399745	5.6955	-2.15036	0.0373033	0.421866	-3.81462	5.4627	5.85847
CDC42SE1	All Targets	RNA	Endogenous	1	13	165	37	37.1542	1	1	56882	FALSE	-0.0873202	6.79262	0.367714	6.75562	2.14991	0.0373415	0.422034	-3.91601	6.96518	6.60893
PTPN11	All Targets	RNA	Endogenous	1	1	52	23	18.8443	1	1	5781	FALSE	0.00919739	5.88221	-0.389494	5.82213	-2.14917	0.0374039	0.42223	-3.83853	5.59741	5.97943
SYN3	All Targets	RNA	Endogenous	1	2	50	21	15.0418	1	1	8224	FALSE	0.586135	5.58351	-0.452656	5.49977	-2.14894	0.0374231	0.42223	-3.77869	5.17494	5.72715
KCNC4	All Targets	RNA	Endogenous	1	8	50	22	22.0754	1	1	3749	FALSE	0.0308749	6.08805	0.375835	6.01665	2.14887	0.037429	0.42223	-3.92539	6.25279	5.85136
NPC1	All Targets	RNA	Endogenous	1	1	51	18	14.4282	1	1	4864	FALSE	0.642181	5.54427	-0.441036	5.4709	-2.14789	0.0375117	0.422897	-3.81813	5.22412	5.64364
IMP4	All Targets	RNA	Endogenous	1	3	45	20	16.32	1	1	92856	FALSE	0.372986	5.6844	0.412204	5.60346	2.14732	0.0375595	0.423172	-3.84639	5.87989	5.40995
KLHL38	All Targets	RNA	Endogenous	1	6	35	15	15.1908	1	1	340359	FALSE	-0.36413	5.58909	0.390599	5.49488	2.14665	0.0376163	0.423396	-3.85888	5.7541	5.31342
CACNA1B	All Targets	RNA	Endogenous	1	2	42	20	14.8479	1	1	774	FALSE	0.0649672	5.56284	-0.390669	5.48337	-2.1464	0.0376369	0.423396	-3.82234	5.26004	5.63971
GTF3C4	All Targets	RNA	Endogenous	1	3	41	20	13.3483	1	1	9329	FALSE	-0.0714638	5.42137	-0.41447	5.32922	-2.14622	0.0376523	0.423396	-3.79357	5.11032	5.48245
SLC25A14	All Targets	RNA	Endogenous	1	5	79	19	18.5664	1	1	9016	FALSE	-0.167458	5.85393	0.397542	5.78132	2.14597	0.0376733	0.423396	-3.84101	6.02447	5.61111
KIF3B	All Targets	RNA	Endogenous	1	2	53	23	16.595	1	1	9371	FALSE	0.319579	5.71325	-0.458705	5.63565	-2.14524	0.0377359	0.423561	-3.80713	5.31929	5.85711
DNASE1L1	All Targets	RNA	Endogenous	1	5	50	20	17.4366	1	1	1774	FALSE	0.0756121	5.76882	0.411408	5.69149	2.14504	0.0377528	0.423561	-3.86333	5.95814	5.50483
NTM	All Targets	RNA	Endogenous	1	5	113	23	20.0342	1	1	50863	FALSE	-0.423358	5.95349	0.414469	5.88914	2.14497	0.0377584	0.423561	-3.83089	6.13772	5.71514
OR6K6	All Targets	RNA	Endogenous	1	3	37	14	12.2986	1	1	128371	FALSE	-0.695128	5.31486	-0.416408	5.21465	-2.14448	0.0377999	0.423723	-3.77669	4.97951	5.37925
TXNIP	All Targets	RNA	Endogenous	1	7	202	43	36.0725	1	1	10628	FALSE	0.738959	6.75407	-0.480631	6.7193	-2.16073	0.0378415	0.423723	-3.85949	6.42855	6.92283
GAS2L1	All Targets	RNA	Endogenous	1	4	43	18	15.9315	1	1	10634	FALSE	-0.449819	5.64767	0.390167	5.56553	2.14397	0.0378433	0.423723	-3.84716	5.77387	5.41969
ATP11C	All Targets	RNA	Endogenous	1	1	45	18	13.2941	1	1	286410	FALSE	-0.712507	5.42405	-0.430021	5.33956	-2.14289	0.0379352	0.424273	-3.78754	5.07656	5.52367
PRDM4	All Targets	RNA	Endogenous	1	4	45	15	16.2829	1	1	11108	FALSE	-0.819754	5.67883	0.392002	5.59542	2.14268	0.0379532	0.424273	-3.86098	5.85364	5.41467
HDGFL1	All Targets	RNA	Endogenous	1	3	51	22	20.8619	1	1	154150	FALSE	-0.390866	6.00766	-0.361785	5.94532	-2.14255	0.037964	0.424273	-3.86178	5.72801	6.09745
SKA1	All Targets	RNA	Endogenous	1	2	49	17	14.9214	1	1	220134	FALSE	0.48971	5.5766	-0.405383	5.47882	-2.14229	0.0379865	0.424273	-3.84693	5.27722	5.61994
DYNLT1	All Targets	RNA	Endogenous	1	2	66	24	18.0719	1	1	6993	FALSE	0.395643	5.8248	0.425854	5.75252	2.14186	0.0380227	0.424414	-3.84345	6.04698	5.5464
TSHZ2	All Targets	RNA	Endogenous	1	1	40	21	11.6849	1	1	128553	FALSE	0.54391	5.2898	-0.50068	5.17819	-2.1434	0.0380662	0.424538	-3.79902	4.91047	5.36559
ANKRD29	All Targets	RNA	Endogenous	1	2	47	17	13.5611	1	1	147463	FALSE	0.0056266	5.4446	-0.468199	5.35176	-2.14088	0.038107	0.424538	-3.79841	5.09796	5.52941
MIDN	All Targets	RNA	Endogenous	1	7	231	39	36.6284	1	1	90007	FALSE	0.944742	6.77634	-0.524246	6.73875	-2.18454	0.0381372	0.424538	-3.86695	6.42271	6.95998
NSUN3	All Targets	RNA	Endogenous	1	1	48	16	13.3985	1	1	63899	FALSE	-0.880014	5.44161	-0.426387	5.3457	-2.13944	0.0382304	0.424538	-3.83173	5.10077	5.51715
SLC35D2	All Targets	RNA	Endogenous	1	3	61	22	22.7286	1	1	11046	FALSE	-0.356507	6.12424	-0.367494	6.06792	-2.13927	0.0382445	0.424538	-3.86456	5.85693	6.21561
PROM1	All Targets	RNA	Endogenous	1	2	38	20	13.1455	1	1	8842	FALSE	0.182273	5.40371	-0.419464	5.31123	-2.13926	0.0382454	0.424538	-3.81792	5.03838	5.50223
L3MBTL1	All Targets	RNA	Endogenous	1	4	45	22	19.2669	1	1	26013	FALSE	-1.20534	5.90103	0.352229	5.83099	2.13886	0.0382801	0.424538	-3.88557	6.0455	5.68082
HES4	All Targets	RNA	Endogenous	1	6	49	27	22.2857	1	1	57801	FALSE	0.137438	6.09658	0.472125	6.03261	2.15861	0.0382859	0.424538	-3.88557	6.29348	5.84999
ARHGEF1	All Targets	RNA	Endogenous	1	7	76	23	21.2366	1	1	9138	FALSE	-0.570102	6.02987	0.396718	5.96736	2.13848	0.0383128	0.424538	-3.87934	6.20785	5.79902
CAV2	All Targets	RNA	Endogenous	1	1	39	20	14.5469	1	1	858	FALSE	0.272576	5.54014	-0.422527	5.46519	-2.13836	0.0383231	0.424538	-3.82616	5.18607	5.66058
ZNF597	All Targets	RNA	Endogenous	1	1	51	20	15.1325	1	1	146434	FALSE	-0.467685	5.60186	-0.400691	5.51191	-2.13811	0.0383444	0.424538	-3.86315	5.25242	5.69355
PLIN1	All Targets	RNA	Endogenous	1	3	41	16	14.4741	1	1	5346	FALSE	0.542555	5.52755	0.456231	5.43513	2.13984	0.0383714	0.424538	-3.85958	5.71791	5.23717
BPIFB2	All Targets	RNA	Endogenous	1	3	37	14	11.5244	1	1	80341	FALSE	0.196335	5.23545	-0.445345	5.13016	-2.13735	0.0384098	0.424538	-3.78692	4.86229	5.31766
MAML3	All Targets	RNA	Endogenous	1	1	58	16	14.7237	1	1	55534	FALSE	-0.215181	5.55356	-0.405523	5.48005	-2.13734	0.0384109	0.424538	-3.82428	5.25126	5.64021
EBF2	All Targets	RNA	Endogenous	1	1	40	14	10.3781	1	1	64641	FALSE	0.425457	5.11684	-0.478301	5.00355	-2.13718	0.0384248	0.424538	-3.77684	4.78596	5.15586
KRT33B	All Targets	RNA	Endogenous	1	2	31	14	11.7479	1	1	3884	FALSE	0.424993	5.26631	-0.418602	5.15083	-2.13708	0.0384328	0.424538	-3.80816	4.95329	5.28912
MTFR1	All Targets	RNA	Endogenous	1	1	37	18	12.9157	1	1	9650	FALSE	-0.829803	5.39118	-0.438842	5.29387	-2.13707	0.0384339	0.424538	-3.82286	5.00152	5.49851
OR5L1	All Targets	RNA	Endogenous	1	2	36	13	11.7978	1	1	219437	FALSE	-0.165267	5.27157	-0.4559	5.15847	-2.13666	0.0384689	0.424576	-3.80875	4.90095	5.33874
BYSL	All Targets	RNA	Endogenous	1	4	32	17	13.2274	1	1	705	FALSE	0.234508	5.41092	0.429506	5.30828	2.13649	0.0384844	0.424576	-3.84095	5.62423	5.08711
MSL1	All Targets	RNA	Endogenous	1	1	82	30	21.099	1	1	339287	FALSE	-0.164748	6.03654	-0.400869	5.98815	-2.13449	0.0386568	0.426217	-3.85417	5.75639	6.15038
ACKR2	All Targets	RNA	Endogenous	1	1	42	16	14.0197	1	1	1238	FALSE	-0.111072	5.49446	-0.437873	5.41305	-2.13417	0.0386843	0.426258	-3.82411	5.14739	5.599
CLIC1	All Targets	RNA	Endogenous	1	7	165	33	28.6417	1	1	1192	FALSE	-0.952677	6.43566	0.375435	6.3899	2.1339	0.0387078	0.426258	-3.90334	6.63841	6.21594
OR56A5	All Targets	RNA	Endogenous	1	2	49	24	17.9778	1	1	390084	FALSE	-0.260096	5.81121	-0.421519	5.74393	-2.13348	0.0387446	0.426403	-3.84705	5.48277	5.92675
ZNF580	All Targets	RNA	Endogenous	1	2	51	21	17.7075	1	1	51157	FALSE	-0.151938	5.79313	-0.410036	5.72203	-2.1324	0.0388379	0.427169	-3.84191	5.48514	5.88785
COMMD3	All Targets	RNA	Endogenous	1	6	54	22	19.1739	1	1	23412	FALSE	0.296029	5.89406	0.395049	5.82158	2.12995	0.0390516	0.429123	-3.91027	6.04343	5.66628
TTYH3	All Targets	RNA	Endogenous	1	21	217	58	63.7334	1	1	80727	FALSE	-0.833864	7.54562	0.342103	7.52422	2.12982	0.0390631	0.429123	-3.93581	7.7215	7.38613
CCDC140	All Targets	RNA	Endogenous	1	2	37	19	13.2461	1	1	151278	FALSE	-0.190007	5.41388	-0.450916	5.32549	-2.12927	0.0391116	0.429376	-3.82297	5.06411	5.50845
KCNK15	All Targets	RNA	Endogenous	1	6	43	20	16.2047	1	1	60598	FALSE	0.131469	5.6701	0.380168	5.58586	2.1289	0.0391439	0.429376	-3.88015	5.79246	5.44123
E2F2	All Targets	RNA	Endogenous	1	2	44	13	11.2133	1	1	1870	FALSE	-0.0506156	5.20283	-0.422112	5.09819	-2.12874	0.0391575	0.429376	-3.79921	4.82352	5.29046
TMEM214	All Targets	RNA	Endogenous	1	1	52	23	17.9957	1	1	54867	FALSE	-1.07162	5.81964	-0.413682	5.75913	-2.12817	0.0392079	0.429667	-3.86242	5.49944	5.94091
CDCP2	All Targets	RNA	Endogenous	1	3	45	14	13.4124	1	1	200008	FALSE	-0.145363	5.42935	-0.449636	5.337	-2.12784	0.0392368	0.429723	-3.81933	5.04294	5.54284
EMC2	All Targets	RNA	Endogenous	1	3	72	20	16.782	1	1	9694	FALSE	0.585897	5.72746	-0.491346	5.65276	-2.12726	0.0392874	0.429896	-3.81078	5.39956	5.83
CACNA1I	All Targets	RNA	Endogenous	1	2	34	16	11.5928	1	1	8911	FALSE	0.277597	5.24305	-0.481419	5.13793	-2.12712	0.0393003	0.429896	-3.81027	4.86349	5.33004
BEGAIN	All Targets	RNA	Endogenous	1	2	87	31	25.9788	1	1	57596	FALSE	0.530366	6.35121	-0.437555	6.26688	-2.12789	0.0393276	0.429934	-3.89314	5.92099	6.509
BEST2	All Targets	RNA	Endogenous	1	4	37	16	13.0296	1	1	54831	FALSE	0.125473	5.38977	-0.435907	5.28947	-2.12584	0.0394127	0.430604	-3.81768	5.04466	5.46084
CYB561A3	All Targets	RNA	Endogenous	1	4	48	18	14.6678	1	1	220002	FALSE	-0.177678	5.54157	0.408202	5.45118	2.1248	0.0395044	0.431292	-3.87557	5.70073	5.27649
SH3PXD2B	All Targets	RNA	Endogenous	1	2	72	33	21.3077	1	1	285590	FALSE	-0.0981427	6.03891	-0.413552	5.98546	-2.12458	0.0395235	0.431292	-3.86161	5.72907	6.16493
MEGF8	All Targets	RNA	Endogenous	1	16	211	54	53.9263	1	1	1954	FALSE	-0.753246	7.31126	0.346206	7.28653	2.12325	0.0396418	0.432207	-3.95344	7.47816	7.15239
RPL22	All Targets	RNA	Endogenous	1	6	240	51	38.1367	1	1	6146	FALSE	0.302776	6.83325	0.388874	6.79938	2.12309	0.0396553	0.432207	-3.93535	7.04834	6.62511
ENKUR	All Targets	RNA	Endogenous	1	1	36	14	11.8154	1	1	219670	FALSE	0.465396	5.28012	-0.408696	5.18241	-2.12207	0.0397458	0.432651	-3.84683	4.9099	5.37316
AAMP	All Targets	RNA	Endogenous	1	8	156	24	31.5571	1	1	14	FALSE	-0.168016	6.56936	0.371039	6.52489	2.12205	0.0397479	0.432651	-3.95653	6.74364	6.37177
PYGL	All Targets	RNA	Endogenous	1	1	62	21	16.5253	1	1	5836	FALSE	0.113583	5.71092	-0.421001	5.64242	-2.12158	0.0397897	0.432651	-3.85301	5.37251	5.83136
WDR54	All Targets	RNA	Endogenous	1	2	47	18	14.1074	1	1	84058	FALSE	-0.461471	5.49397	-0.400082	5.40236	-2.12155	0.039792	0.432651	-3.85348	5.17913	5.55861
CPD	All Targets	RNA	Endogenous	1	10	55	23	23.0856	1	1	1362	FALSE	0.156695	6.14196	0.355057	6.08031	2.1196	0.0399655	0.434276	-3.96082	6.28072	5.94002
RPL13	All Targets	RNA	Endogenous	1	18	507	58	64.5435	1	1	6137	FALSE	0.477444	7.56632	0.428154	7.5443	2.12805	0.0400159	0.434345	-3.95282	7.82132	7.35039
CEBPD	All Targets	RNA	Endogenous	1	3	424	46	34.045	1	1	1052	FALSE	1.10899	6.68694	-0.924791	6.6542	-2.27431	0.0400307	0.434345	-3.7158	6.11084	7.03455
BIRC2	All Targets	RNA	Endogenous	1	2	58	25	17.1772	1	1	329	FALSE	0.495675	5.75565	-0.420876	5.69194	-2.11872	0.0400441	0.434345	-3.87147	5.40892	5.89006
N4BP2L1	All Targets	RNA	Endogenous	1	4	33	17	16.998	1	1	90634	FALSE	-0.946161	5.73457	0.369745	5.65196	2.11802	0.0401068	0.434764	-3.9177	5.85279	5.51138
HHLA2	All Targets	RNA	Endogenous	1	2	55	15	13.2562	1	1	11148	FALSE	0.32197	5.4152	-0.45236	5.32558	-2.11768	0.0401375	0.434835	-3.84663	5.08116	5.49667
SLC16A13	All Targets	RNA	Endogenous	1	1	28	17	11.6493	1	1	201232	FALSE	-0.783524	5.25935	-0.45871	5.15654	-2.11661	0.0402329	0.435607	-3.84874	4.84719	5.37309
MMP24	All Targets	RNA	Endogenous	1	2	35	17	12.4147	1	1	10893	FALSE	0.128268	5.32862	-0.421737	5.23813	-2.11566	0.0403181	0.436268	-3.8454	4.94839	5.44094
COL7A1	All Targets	RNA	Endogenous	1	4	47	19	16.1331	1	1	1294	FALSE	0.246974	5.66845	0.429529	5.58497	2.11474	0.040401	0.436902	-3.90128	5.80834	5.42861
COL22A1	All Targets	RNA	Endogenous	1	1	35	19	14.1255	1	1	169044	FALSE	-0.00175888	5.5021	-0.416141	5.41945	-2.11394	0.0404732	0.437257	-3.86927	5.15014	5.60798
LASP1	All Targets	RNA	Endogenous	1	10	93	34	30.7195	1	1	3927	FALSE	-0.304839	6.53033	0.354878	6.48644	2.11384	0.0404823	0.437257	-3.97705	6.69654	6.33936
CHMP1A	All Targets	RNA	Endogenous	1	5	47	20	18.7406	1	1	5119	FALSE	-0.0113577	5.86481	0.397737	5.78989	2.11331	0.0405299	0.437509	-3.94707	6.05069	5.60733
MT1A	All Targets	RNA	Endogenous	1	4	600	33	33.5959	1	1	4489	FALSE	1.11301	6.66649	-1.24644	6.62716	-2.33309	0.0406268	0.438108	-3.69834	5.90564	7.13222
CYP2A6	All Targets	RNA	Endogenous	1	12	243	51	47.8342	1	1	1548	FALSE	-0.717858	7.14434	0.365145	7.11638	2.11181	0.0406663	0.438108	-3.97221	7.31682	6.97608
KLHL29	All Targets	RNA	Endogenous	1	1	53	20	15.9238	1	1	114818	FALSE	-0.613379	5.65926	-0.394557	5.58803	-2.11166	0.0406795	0.438108	-3.89563	5.37603	5.73643
RPS4X	All Targets	RNA	Endogenous	1	16	372	65	62.6397	1	1	6191	FALSE	0.281721	7.52241	0.372736	7.50092	2.11162	0.040683	0.438108	-3.97595	7.73187	7.33925
USP38	All Targets	RNA	Endogenous	1	4	50	13	12.257	1	1	84640	FALSE	0.271458	5.31345	0.424469	5.20866	2.11103	0.040737	0.438108	-3.85906	5.52144	4.98971
NOTO	All Targets	RNA	Endogenous	1	2	48	20	15.7648	1	1	344022	FALSE	0.0447165	5.64499	-0.402664	5.5678	-2.11091	0.0407479	0.438108	-3.88265	5.31417	5.74534
GREM1	All Targets	RNA	Endogenous	1	6	42	23	18.3482	1	1	26585	FALSE	-0.0584473	5.83486	0.381357	5.75942	2.11043	0.0407913	0.438108	-3.94139	5.99044	5.5977
SUPT5H	All Targets	RNA	Endogenous	1	4	62	22	17.3494	1	1	6829	FALSE	0.000935016	5.76214	0.38413	5.68821	2.10955	0.0408708	0.438108	-3.90829	5.94258	5.51015
CSRP1	All Targets	RNA	Endogenous	1	8	206	43	44.9878	1	1	1465	FALSE	-0.489623	7.06069	-0.375463	7.03366	-2.10909	0.0409133	0.438108	-3.93925	6.82042	7.18293
BCKDHA	All Targets	RNA	Endogenous	1	1	56	20	15.4301	1	1	593	FALSE	-0.658823	5.61567	-0.402587	5.54756	-2.10868	0.0409501	0.438108	-3.87138	5.29665	5.72319
ZNF514	All Targets	RNA	Endogenous	1	5	42	20	15.5077	1	1	84874	FALSE	0.376773	5.61754	0.443459	5.52471	2.1093	0.0409766	0.438108	-3.91081	5.79652	5.33444
ISL1	All Targets	RNA	Endogenous	1	2	37	19	14.0072	1	1	3670	FALSE	-0.39039	5.48932	-0.42956	5.39527	-2.10839	0.0409767	0.438108	-3.87105	5.12002	5.58794
ZNF723	All Targets	RNA	Endogenous	1	4	99	29	21.457	1	1	646864	FALSE	-0.366628	6.04776	-0.410197	5.99249	-2.10764	0.0410452	0.438108	-3.8565	5.7436	6.16672
VAMP2	All Targets	RNA	Endogenous	1	2	86	21	23.4358	1	1	6844	FALSE	-0.183585	6.1688	0.377557	6.11685	2.10721	0.0410845	0.438108	-3.93495	6.33684	5.96285
CYLC1	All Targets	RNA	Endogenous	1	2	31	14	12.354	1	1	1538	FALSE	0.157551	5.32484	-0.450201	5.22275	-2.10705	0.0410993	0.438108	-3.86001	4.92741	5.42949
GHDC	All Targets	RNA	Endogenous	1	1	38	16	9.46324	1	1	84514	FALSE	0.278333	5.01043	-0.527062	4.88686	-2.10837	0.0411177	0.438108	-3.82169	4.58081	5.1011
PLEKHM1	All Targets	RNA	Endogenous	1	5	50	21	18.9679	1	1	9842	FALSE	-0.455095	5.8788	0.381067	5.80966	2.10652	0.0411474	0.438108	-3.9268	6.0535	5.63897
MAF	All Targets	RNA	Endogenous	1	5	73	21	22.9968	1	1	4094	FALSE	0.227789	6.14005	0.405434	6.07934	2.10648	0.0411513	0.438108	-3.94843	6.27106	5.94514
TGFBRAP1	All Targets	RNA	Endogenous	1	4	45	21	17.0611	1	1	9392	FALSE	0.37499	5.74251	-0.416326	5.66197	-2.106	0.0411952	0.438108	-3.88681	5.4261	5.82707
TAS2R60	All Targets	RNA	Endogenous	1	7	35	17	16.3748	1	1	338398	FALSE	-0.579532	5.68736	0.373039	5.59922	2.10591	0.0412035	0.438108	-3.94606	5.81279	5.44971
SEC61B	All Targets	RNA	Endogenous	1	8	93	31	25.0651	1	1	10952	FALSE	-0.293465	6.25272	0.34937	6.19882	2.10587	0.0412071	0.438108	-3.98358	6.4259	6.03986
CNTROB	All Targets	RNA	Endogenous	1	1	35	16	10.8104	1	1	116840	FALSE	0.44999	5.16333	-0.453038	5.05734	-2.10584	0.0412095	0.438108	-3.83499	4.80598	5.2333
SLC39A12	All Targets	RNA	Endogenous	1	2	57	19	15.3302	1	1	221074	FALSE	-0.426117	5.6016	-0.446058	5.52183	-2.10581	0.0412125	0.438108	-3.87888	5.26668	5.70043
BASP1	All Targets	RNA	Endogenous	1	20	717	75	113.501	1	1	10409	FALSE	-0.644551	8.36627	0.398498	8.35256	2.10529	0.0412601	0.438108	-3.93548	8.58529	8.18966
NIPA1	All Targets	RNA	Endogenous	1	4	37	16	15.3042	1	1	123606	FALSE	-0.118348	5.59599	0.395514	5.50819	2.10491	0.0412951	0.438108	-3.90977	5.69178	5.37967
OPRPN	All Targets	RNA	Endogenous	1	7	54	20	19.3566	1	1	58503	FALSE	0.019241	5.9068	0.373541	5.83567	2.1049	0.0412957	0.438108	-3.95953	6.05995	5.67867
TCF4	All Targets	RNA	Endogenous	1	6	69	24	20.7365	1	1	6925	FALSE	-0.267859	5.99778	0.368947	5.93365	2.10486	0.0412995	0.438108	-3.93169	6.13562	5.79227
ATP1B3	All Targets	RNA	Endogenous	1	5	129	23	22.8001	1	1	483	FALSE	-0.560524	6.12595	0.367312	6.06968	2.10477	0.041308	0.438108	-3.92013	6.29398	5.91268
SERPINB1	All Targets	RNA	Endogenous	1	6	61	16	19.7379	1	1	1992	FALSE	-0.111286	5.93373	0.365875	5.86122	2.10452	0.0413313	0.438108	-3.96912	6.09166	5.69992
ADGRG6	All Targets	RNA	Endogenous	1	1	54	24	15.6639	1	1	57211	FALSE	-0.82231	5.6373	-0.396235	5.56946	-2.1045	0.0413326	0.438108	-3.87668	5.33278	5.73513
SYTL2	All Targets	RNA	Endogenous	1	4	52	21	17.0525	1	1	54843	FALSE	-0.33495	5.73671	0.373244	5.65988	2.10444	0.0413382	0.438108	-3.92092	5.86308	5.51765
BCO2	All Targets	RNA	Endogenous	1	1	35	16	13.6241	1	1	83875	FALSE	0.223396	5.45624	-0.41246	5.37187	-2.10412	0.0413674	0.438159	-3.89463	5.13689	5.53636
TRIM64C	All Targets	RNA	Endogenous	1	3	38	10	10.7187	1	1	646754	FALSE	-0.0685777	5.14146	-0.478052	5.02685	-2.10369	0.0414069	0.438321	-3.84514	4.79094	5.19198
GPX2	All Targets	RNA	Endogenous	1	5	32	16	13.3457	1	1	2877	FALSE	-0.0198118	5.41957	0.403065	5.31746	2.1028	0.0414894	0.438764	-3.89832	5.55315	5.15247
VSX2	All Targets	RNA	Endogenous	1	3	46	18	14.5107	1	1	338917	FALSE	0.0775692	5.5288	-0.438092	5.44901	-2.10271	0.0414975	0.438764	-3.86963	5.17843	5.63842
MYL12B	All Targets	RNA	Endogenous	1	7	172	57	47.7098	1	1	103910	FALSE	-0.485874	7.1431	0.417079	7.11593	2.10197	0.0415662	0.438992	-3.95115	7.33684	6.9613
FBXW12	All Targets	RNA	Endogenous	1	3	53	22	18.8434	1	1	285231	FALSE	0.277296	5.87208	-0.421273	5.80855	-2.10177	0.0415847	0.438992	-3.89825	5.53816	5.99782
ASXL2	All Targets	RNA	Endogenous	1	3	38	19	16.346	1	1	55252	FALSE	0.397282	5.68847	0.473084	5.60336	2.12103	0.0415921	0.438992	-3.94173	5.87048	5.41638
LCN1	All Targets	RNA	Endogenous	1	1	44	16	13.4824	1	1	3933	FALSE	-0.129644	5.44732	-0.419042	5.36434	-2.1011	0.0416462	0.439307	-3.89411	5.08752	5.55812
KLK11	All Targets	RNA	Endogenous	1	3	52	20	17.4377	1	1	11012	FALSE	-0.265433	5.77422	-0.417685	5.69577	-2.10075	0.0416789	0.439389	-3.91416	5.40412	5.89992
STXBP1	All Targets	RNA	Endogenous	1	3	57	20	15.2034	1	1	6812	FALSE	-0.0744794	5.5913	-0.427188	5.51396	-2.10049	0.0417027	0.439389	-3.85783	5.2242	5.71679
LY86	All Targets	RNA	Endogenous	1	2	47	14	13.2562	1	1	9450	FALSE	0.710429	5.41876	-0.454271	5.32632	-2.09924	0.041818	0.440108	-3.89035	5.04532	5.52303
CUL4A	All Targets	RNA	Endogenous	1	2	50	19	16.3373	1	1	8451	FALSE	-0.12283	5.68425	-0.410186	5.60859	-2.09897	0.0418432	0.440108	-3.89734	5.37286	5.77361
OR52B6	All Targets	RNA	Endogenous	1	2	55	19	15.4849	1	1	340980	FALSE	0.058075	5.61583	-0.417432	5.53395	-2.09896	0.0418442	0.440108	-3.90468	5.30727	5.69262
SGPP2	All Targets	RNA	Endogenous	1	1	55	27	17.3419	1	1	130367	FALSE	-0.569989	5.77377	-0.416457	5.71262	-2.09844	0.0418931	0.440366	-3.90871	5.43459	5.90724
GLT1D1	All Targets	RNA	Endogenous	1	4	52	22	19.0924	1	1	144423	FALSE	-0.730187	5.89181	-0.376429	5.81902	-2.09709	0.0420183	0.440869	-3.92993	5.59252	5.97756
CASTOR1	All Targets	RNA	Endogenous	1	3	44	20	14.8887	1	1	652968	FALSE	0.496369	5.56348	-0.431657	5.4781	-2.09704	0.0420227	0.440869	-3.89094	5.21179	5.66452
CAPNS2	All Targets	RNA	Endogenous	1	1	44	19	15.7831	1	1	84290	FALSE	-0.408901	5.64634	-0.388058	5.57313	-2.09697	0.0420293	0.440869	-3.91423	5.34005	5.73629
RHAG	All Targets	RNA	Endogenous	1	1	39	15	13.3002	1	1	6005	FALSE	-0.0267972	5.42588	-0.427693	5.34436	-2.09673	0.0420519	0.440869	-3.89152	5.07458	5.53321
PDZRN3	All Targets	RNA	Endogenous	1	1	53	20	16.8814	1	1	23024	FALSE	-0.13469	5.73515	-0.392169	5.67087	-2.09661	0.0420632	0.440869	-3.91789	5.42537	5.84271
CD5L	All Targets	RNA	Endogenous	1	4	48	15	15.4353	1	1	922	FALSE	0.398318	5.61281	0.424003	5.52346	2.09555	0.0421622	0.441124	-3.94074	5.78514	5.34029
RAPGEF5	All Targets	RNA	Endogenous	1	1	61	17	13.3431	1	1	9771	FALSE	0.373881	5.43461	-0.436249	5.347	-2.09528	0.0421875	0.441124	-3.88393	5.0792	5.53446
ANO2	All Targets	RNA	Endogenous	1	2	44	25	15.5853	1	1	57101	FALSE	0.0921634	5.62572	-0.423633	5.54601	-2.09477	0.0422351	0.441124	-3.91022	5.26423	5.74326
FBLN5	All Targets	RNA	Endogenous	1	5	112	35	27.6323	1	1	10516	FALSE	-0.195714	6.3872	-0.408844	6.34355	-2.09466	0.042245	0.441124	-3.91912	6.09935	6.51449
EMC4	All Targets	RNA	Endogenous	1	4	66	27	20.2173	1	1	51234	FALSE	-0.125646	5.96457	0.396848	5.90123	2.09465	0.0422462	0.441124	-3.94267	6.13398	5.73831
LRRC37B	All Targets	RNA	Endogenous	1	4	43	21	17.9354	1	1	114659	FALSE	0.0409938	5.80746	0.396226	5.73082	2.09363	0.0423418	0.441124	-3.9624	5.94219	5.58287
PLEKHG4B	All Targets	RNA	Endogenous	1	1	46	19	13.3706	1	1	153478	FALSE	0.244915	5.43072	-0.445759	5.34703	-2.0935	0.0423538	0.441124	-3.89175	5.03184	5.56767
LGI2	All Targets	RNA	Endogenous	1	3	38	22	13.9767	1	1	55203	FALSE	-0.109156	5.47848	-0.390896	5.38973	-2.0934	0.0423636	0.441124	-3.89307	5.15444	5.55443
NOP58	All Targets	RNA	Endogenous	1	2	68	25	20.6957	1	1	51602	FALSE	0.263139	5.99937	-0.37867	5.94215	-2.09335	0.042368	0.441124	-3.93238	5.71954	6.09798
PHYHD1	All Targets	RNA	Endogenous	1	4	43	22	17.6831	1	1	254295	FALSE	-0.105251	5.7866	0.362376	5.70844	2.09266	0.0424329	0.441124	-3.96693	5.92408	5.5575
YIPF7	All Targets	RNA	Endogenous	1	1	40	14	10.4552	1	1	285525	FALSE	0.671942	5.1318	-0.441278	5.01936	-2.09245	0.0424532	0.441124	-3.89247	4.74427	5.21193
GPR63	All Targets	RNA	Endogenous	1	1	34	18	13.9754	1	1	81491	FALSE	0.258397	5.48991	-0.420432	5.40382	-2.09216	0.0424806	0.441124	-3.89643	5.14943	5.5819
RAC1	All Targets	RNA	Endogenous	1	4	91	19	23.6935	1	1	5879	FALSE	0.271602	6.17834	0.368245	6.12216	2.09193	0.0425017	0.441124	-3.96995	6.33325	5.97439
PRKCD	All Targets	RNA	Endogenous	1	3	45	28	18.7975	1	1	5580	FALSE	-0.382413	5.86939	-0.375917	5.80223	-2.09168	0.0425252	0.441124	-3.9304	5.5822	5.95624
RHEB	All Targets	RNA	Endogenous	1	3	65	22	20.0067	1	1	6009	FALSE	0.14791	5.95826	-0.417131	5.89256	-2.09158	0.0425343	0.441124	-3.89734	5.62415	6.08044
FCSK	All Targets	RNA	Endogenous	1	1	35	15	10.9646	1	1	197258	FALSE	0.346725	5.18449	-0.444353	5.06795	-2.0914	0.0425515	0.441124	-3.87969	4.80197	5.25414
SDHAF2	All Targets	RNA	Endogenous	1	1	39	10	10.1159	1	1	54949	FALSE	0.239194	5.07356	-0.434511	4.96458	-2.09138	0.0425533	0.441124	-3.87711	4.72791	5.13025
C9orf43	All Targets	RNA	Endogenous	1	1	36	15	13.089	1	1	257169	FALSE	0.0843615	5.416	-0.404304	5.3134	-2.09135	0.0425561	0.441124	-3.91311	5.05843	5.49188
MANF	All Targets	RNA	Endogenous	1	3	66	18	15.9926	1	1	7873	FALSE	0.237329	5.65736	0.394892	5.57487	2.09125	0.0425659	0.441124	-3.92778	5.82458	5.40007
EHD2	All Targets	RNA	Endogenous	1	6	67	17	19.028	1	1	30846	FALSE	-0.406595	5.88508	0.422374	5.81348	2.09087	0.042602	0.441124	-3.95395	6.06615	5.6366
SPTY2D1	All Targets	RNA	Endogenous	1	3	40	20	15.5613	1	1	144108	FALSE	-0.130878	5.6201	-0.399947	5.53789	-2.0906	0.0426268	0.441124	-3.90363	5.29065	5.71095
TMEM59L	All Targets	RNA	Endogenous	1	6	60	28	21.4207	1	1	25789	FALSE	0.515899	6.04536	0.416015	5.97731	2.09585	0.0426509	0.441124	-4.00608	6.22633	5.803
EPOP	All Targets	RNA	Endogenous	1	3	48	18	14.2629	1	1	100170841	FALSE	-0.221551	5.51019	-0.440886	5.41645	-2.09022	0.0426627	0.441124	-3.88343	5.16167	5.59479
SERPINB10	All Targets	RNA	Endogenous	1	2	46	20	14.5244	1	1	5273	FALSE	0.24296	5.53293	-0.420128	5.44562	-2.08964	0.0427175	0.441124	-3.91603	5.19025	5.62438
ERVV-1	All Targets	RNA	Endogenous	1	7	40	16	15.3675	1	1	147664	FALSE	-0.129297	5.60745	0.355757	5.50853	2.0894	0.0427405	0.441124	-3.97645	5.70449	5.37136
C20orf173	All Targets	RNA	Endogenous	1	2	30	15	12.2637	1	1	140873	FALSE	-0.0858147	5.31205	-0.415161	5.21474	-2.08917	0.0427618	0.441124	-3.89455	4.97295	5.38399
SMIM15	All Targets	RNA	Endogenous	1	6	51	15	16.8293	1	1	643155	FALSE	-0.367388	5.72279	0.378157	5.63917	2.089	0.0427786	0.441124	-3.95504	5.87644	5.47308
CPSF7	All Targets	RNA	Endogenous	1	3	70	22	19.9135	1	1	79869	FALSE	0.0832605	5.94539	-0.391615	5.88331	-2.08887	0.0427905	0.441124	-3.92689	5.64816	6.04792
RTN2	All Targets	RNA	Endogenous	1	1	54	19	14.1202	1	1	6253	FALSE	0.087039	5.50686	-0.440812	5.4197	-2.08865	0.0428119	0.441124	-3.91059	5.12442	5.62639
KRTAP5-11	All Targets	RNA	Endogenous	1	4	126	24	17.2338	1	1	440051	FALSE	0.202678	5.75926	-0.502703	5.67942	-2.0988	0.0428624	0.441124	-3.9037	5.37043	5.89571
RSPH4A	All Targets	RNA	Endogenous	1	2	83	25	19.9366	1	1	345895	FALSE	0.470904	5.95455	-0.381894	5.88812	-2.08808	0.0428656	0.441124	-3.95958	5.66716	6.04279
OR13C9	All Targets	RNA	Endogenous	1	1	38	16	12.6162	1	1	286362	FALSE	0.470714	5.35979	-0.42642	5.27018	-2.08792	0.0428812	0.441124	-3.91191	5.03341	5.43593
ADSS2	All Targets	RNA	Endogenous	1	6	43	20	18.8173	1	1	159	FALSE	0.396329	5.86876	0.391933	5.79356	2.0876	0.0429114	0.441124	-3.97881	6.00709	5.6441
TMEM135	All Targets	RNA	Endogenous	1	5	37	17	16.0317	1	1	65084	FALSE	-0.401043	5.65528	0.367126	5.57068	2.08721	0.042948	0.441124	-3.9527	5.78214	5.42267
CYP27C1	All Targets	RNA	Endogenous	1	5	53	17	18.1881	1	1	339761	FALSE	-0.278795	5.82437	0.371353	5.74921	2.08694	0.0429734	0.441124	-3.96941	5.94627	5.61126
ARL2	All Targets	RNA	Endogenous	1	8	188	34	36.4519	1	1	402	FALSE	-0.504494	6.76853	0.34998	6.7313	2.08675	0.0429921	0.441124	-4.01317	6.93269	6.59033
ITIH6	All Targets	RNA	Endogenous	1	4	34	14	13.0793	1	1	347365	FALSE	-0.0512126	5.39689	0.452042	5.28991	2.08739	0.0430153	0.441124	-3.92764	5.48705	5.15191
WDR48	All Targets	RNA	Endogenous	1	6	67	22	20.6318	1	1	57599	FALSE	-0.261391	5.99268	0.400489	5.92803	2.08649	0.0430168	0.441124	-3.97736	6.18579	5.7476
VEGFD	All Targets	RNA	Endogenous	1	4	46	23	18.1047	1	1	2277	FALSE	-0.24046	5.81868	0.398595	5.74459	2.08534	0.043126	0.441637	-3.9719	5.99475	5.56948
PPM1G	All Targets	RNA	Endogenous	1	1	42	23	14.9407	1	1	5496	FALSE	-0.510443	5.57334	-0.397228	5.50114	-2.08531	0.0431287	0.441637	-3.91274	5.23357	5.68844
CXCR2	All Targets	RNA	Endogenous	1	5	38	14	15.0885	1	1	3579	FALSE	-0.125994	5.57691	0.398135	5.48743	2.08519	0.0431403	0.441637	-3.94477	5.7251	5.32106
NUDT7	All Targets	RNA	Endogenous	1	2	45	14	13.2191	1	1	283927	FALSE	0.451158	5.41001	-0.452859	5.32235	-2.0844	0.0432163	0.441933	-3.89927	5.05139	5.51203
HYAL4	All Targets	RNA	Endogenous	1	1	37	20	13.3563	1	1	23553	FALSE	0.100191	5.42798	-0.41683	5.34157	-2.08437	0.0432185	0.441933	-3.91212	5.09556	5.51378
EFNB1	All Targets	RNA	Endogenous	1	5	57	13	14.8725	1	1	1947	FALSE	-0.0713901	5.56747	0.520003	5.46763	2.11419	0.0432427	0.441933	-3.92947	5.82998	5.21398
SRSF1	All Targets	RNA	Endogenous	1	10	131	43	39.5251	1	1	6426	FALSE	-0.578812	6.87764	0.334288	6.84427	2.08346	0.0433053	0.442095	-4.01944	7.03818	6.70853
LEP	All Targets	RNA	Endogenous	1	5	42	20	18.248	1	1	3952	FALSE	-0.210952	5.82802	0.384533	5.75198	2.08333	0.0433181	0.442095	-3.98258	5.97558	5.59546
TMEM200B	All Targets	RNA	Endogenous	1	1	30	11	10.1039	1	1	399474	FALSE	0.562286	5.07693	-0.423207	4.95851	-2.08319	0.043332	0.442095	-3.88493	4.7016	5.13835
PEX26	All Targets	RNA	Endogenous	1	5	42	15	15.482	1	1	55670	FALSE	0.0800991	5.61156	0.406461	5.52347	2.08286	0.0433629	0.442159	-3.93507	5.75085	5.3643
INO80C	All Targets	RNA	Endogenous	1	1	41	20	11.7027	1	1	125476	FALSE	0.716161	5.27631	-0.468401	5.17943	-2.08187	0.0434577	0.442501	-3.90801	4.93483	5.35065
B4GALNT4	All Targets	RNA	Endogenous	1	1	71	17	14.556	1	1	338707	FALSE	-0.450866	5.54753	-0.406053	5.46684	-2.08179	0.0434657	0.442501	-3.90752	5.26553	5.60775
TMEM14C	All Targets	RNA	Endogenous	1	6	70	14	19.2369	1	1	51522	FALSE	0.145782	5.90193	0.432906	5.82921	2.08175	0.04347	0.442501	-3.9589	6.09297	5.64458
PAFAH1B1	All Targets	RNA	Endogenous	1	5	75	37	23.4809	1	1	5048	FALSE	0.455332	6.16766	-0.450041	6.1166	-2.08118	0.0435243	0.442804	-3.93423	5.837	6.31232
NAV1	All Targets	RNA	Endogenous	1	5	40	13	13.0341	1	1	89796	FALSE	0.530614	5.39704	0.487511	5.28617	2.08921	0.0435794	0.443114	-3.92653	5.60922	5.06003
LPCAT2	All Targets	RNA	Endogenous	1	1	46	22	14.6808	1	1	54947	FALSE	0.0534724	5.55175	-0.426085	5.47632	-2.08025	0.0436139	0.443215	-3.92405	5.24908	5.63539
CPSF4L	All Targets	RNA	Endogenous	1	1	45	16	12.6642	1	1	642843	FALSE	0.489181	5.36752	-0.461835	5.27759	-2.07908	0.0437272	0.444116	-3.89412	4.96588	5.49578
GJB6	All Targets	RNA	Endogenous	1	4	39	20	17.3443	1	1	10804	FALSE	0.205038	5.7643	0.388603	5.68043	2.0784	0.0437927	0.444293	-3.99134	5.90405	5.52391
PRR23A	All Targets	RNA	Endogenous	1	1	47	21	15.9608	1	1	729627	FALSE	-0.213514	5.66097	-0.38432	5.58912	-2.07808	0.0438231	0.444293	-3.95355	5.36918	5.74309
KCTD17	All Targets	RNA	Endogenous	1	2	50	20	15.8782	1	1	79734	FALSE	0.282239	5.65161	-0.40883	5.57591	-2.07803	0.0438284	0.444293	-3.9317	5.29357	5.77355
METRNL	All Targets	RNA	Endogenous	1	6	130	39	29.7701	1	1	284207	FALSE	0.717217	6.49097	-0.461585	6.44701	-2.08828	0.0438431	0.444293	-3.97087	6.18304	6.63179
VGLL1	All Targets	RNA	Endogenous	1	2	43	16	14.5896	1	1	51442	FALSE	-0.174789	5.54166	-0.399252	5.4589	-2.07756	0.0438732	0.444349	-3.94072	5.20172	5.63893
SPATA19	All Targets	RNA	Endogenous	1	3	39	20	14.5699	1	1	219938	FALSE	0.351099	5.53618	-0.434364	5.44583	-2.07671	0.0439556	0.444687	-3.92372	5.18829	5.62611
ALOX12	All Targets	RNA	Endogenous	1	5	52	22	18.1623	1	1	239	FALSE	0.404757	5.82466	-0.41805	5.74951	-2.07601	0.044024	0.444687	-3.9483	5.50616	5.91986
SLC26A3	All Targets	RNA	Endogenous	1	2	53	16	11.6122	1	1	1811	FALSE	-0.0851273	5.25742	-0.505763	5.15265	-2.07676	0.0440597	0.444687	-3.88677	4.85432	5.36148
DERL3	All Targets	RNA	Endogenous	1	1	41	21	14.1426	1	1	91319	FALSE	0.165633	5.5079	-0.386177	5.41904	-2.07556	0.0440675	0.444687	-3.94528	5.1968	5.57461
PDAP1	All Targets	RNA	Endogenous	1	5	72	21	18.0095	1	1	11333	FALSE	-0.143863	5.80985	0.394313	5.73648	2.07541	0.0440818	0.444687	-3.96654	5.97059	5.57259
KCNJ9	All Targets	RNA	Endogenous	1	34	324	100	107.712	1	1	3765	FALSE	-0.496193	8.2881	0.370046	8.27459	2.07505	0.0441168	0.444687	-3.98381	8.49602	8.1196
ATP6V1F	All Targets	RNA	Endogenous	1	7	91	25	20.534	1	1	9296	FALSE	0.112052	5.98603	0.381855	5.92013	2.07479	0.0441427	0.444687	-3.9862	6.13616	5.7689
SIGLEC16	All Targets	RNA	Endogenous	1	6	72	26	25.8535	1	1	400709	FALSE	-0.0983197	6.29857	0.349132	6.24265	2.07466	0.0441555	0.444687	-4.02775	6.47356	6.081
TMEM168	All Targets	RNA	Endogenous	1	1	35	16	11.6412	1	1	64418	FALSE	0.0231869	5.25548	-0.459155	5.1566	-2.0745	0.0441703	0.444687	-3.8991	4.84941	5.37163
YTHDC1	All Targets	RNA	Endogenous	1	2	80	26	22.3516	1	1	91746	FALSE	-0.234933	6.10416	-0.390291	6.05369	-2.07449	0.0441718	0.444687	-3.9539	5.8192	6.21784
SMTN	All Targets	RNA	Endogenous	1	2	81	25	21.321	1	1	6525	FALSE	-0.1819	6.03995	-0.418411	5.98647	-2.07405	0.0442143	0.444687	-3.94018	5.72851	6.16705
TRPV6	All Targets	RNA	Endogenous	1	4	38	18	15.9516	1	1	55503	FALSE	0.130445	5.65291	0.370753	5.56734	2.0736	0.0442588	0.444687	-3.98604	5.79362	5.40895
LGI4	All Targets	RNA	Endogenous	1	5	255	34	37.7872	1	1	163175	FALSE	-0.168782	6.82417	-0.438516	6.79121	-2.07328	0.04429	0.444687	-3.94905	6.50426	6.99208
UBAP1	All Targets	RNA	Endogenous	1	3	51	20	17.7643	1	1	51271	FALSE	-0.438065	5.79262	-0.402895	5.72537	-2.07317	0.0443006	0.444687	-3.9431	5.48778	5.89168
CCT5	All Targets	RNA	Endogenous	1	4	66	22	17.4801	1	1	22948	FALSE	-0.596759	5.76969	0.366945	5.69706	2.07313	0.0443042	0.444687	-3.96748	5.91985	5.54112
COL20A1	All Targets	RNA	Endogenous	1	4	36	16	14.6852	1	1	57642	FALSE	-0.160798	5.54365	0.366461	5.45195	2.07307	0.04431	0.444687	-3.97475	5.66616	5.302
RPL8	All Targets	RNA	Endogenous	1	19	263	66	56.1958	1	1	6132	FALSE	0.353413	7.36879	0.363564	7.34412	2.07248	0.044368	0.444687	-4.05089	7.58077	7.17847
TNNI2	All Targets	RNA	Endogenous	1	5	48	18	17.8813	1	1	7136	FALSE	-0.0634287	5.80522	0.415903	5.72396	2.07329	0.0443732	0.444687	-4.00379	5.92367	5.58416
PLEKHB1	All Targets	RNA	Endogenous	1	1	91	28	24.8803	1	1	58473	FALSE	-0.101687	6.25724	-0.375157	6.21496	-2.07201	0.044414	0.444687	-3.99287	5.9846	6.37621
C1orf115	All Targets	RNA	Endogenous	1	5	57	20	18.1791	1	1	79762	FALSE	0.548431	5.83078	0.464631	5.75161	2.0867	0.04442	0.444687	-3.98891	6.04968	5.54297
ANKMY2	All Targets	RNA	Endogenous	1	1	43	14	11.5848	1	1	57037	FALSE	0.157325	5.25622	-0.468378	5.1541	-2.07173	0.0444414	0.444687	-3.90283	4.87239	5.35129
CLEC4E	All Targets	RNA	Endogenous	1	2	43	13	13.6276	1	1	26253	FALSE	0.25205	5.45005	-0.421202	5.36103	-2.07165	0.0444489	0.444687	-3.91345	5.08804	5.55213
BANF2	All Targets	RNA	Endogenous	1	3	50	19	17.096	1	1	140836	FALSE	-0.557869	5.74046	-0.374625	5.66861	-2.0712	0.0444931	0.444882	-3.94986	5.45503	5.81812
ABCC1	All Targets	RNA	Endogenous	1	4	43	17	16.0186	1	1	4363	FALSE	-0.130496	5.65573	0.37847	5.57137	2.07028	0.0445837	0.445541	-3.98749	5.78465	5.42208
UBE2M	All Targets	RNA	Endogenous	1	4	67	24	18.9684	1	1	9040	FALSE	0.373613	5.8814	0.388056	5.8115	2.06955	0.0446549	0.446005	-3.99701	6.02532	5.66183
PROP1	All Targets	RNA	Endogenous	1	2	69	20	15.7786	1	1	5626	FALSE	-0.125076	5.63989	-0.458587	5.56352	-2.06939	0.0446926	0.446039	-3.94295	5.35674	5.70826
ZNF213	All Targets	RNA	Endogenous	1	2	40	19	14.5485	1	1	7760	FALSE	-0.114715	5.53489	-0.415684	5.44998	-2.06901	0.0447078	0.446039	-3.93173	5.17481	5.6426
ARCN1	All Targets	RNA	Endogenous	1	3	52	18	14.8676	1	1	372	FALSE	-0.310698	5.56215	0.380787	5.47609	2.06833	0.0447747	0.44646	-3.95631	5.70407	5.31651
GAB4	All Targets	RNA	Endogenous	1	3	32	17	14.0348	1	1	128954	FALSE	0.319741	5.4901	0.401859	5.38865	2.06743	0.0448641	0.446935	-3.98828	5.67583	5.18763
LRR1	All Targets	RNA	Endogenous	1	1	32	11	10.0877	1	1	122769	FALSE	0.487893	5.08566	-0.504961	4.95884	-2.07214	0.0448989	0.446935	-3.91507	4.65617	5.1707
TNFRSF25	All Targets	RNA	Endogenous	1	4	41	21	15.3551	1	1	8718	FALSE	0.0665371	5.60163	-0.408591	5.5181	-2.06697	0.0449094	0.446935	-3.93026	5.27257	5.68997
PRR25	All Targets	RNA	Endogenous	1	5	48	19	15.2926	1	1	388199	FALSE	-0.705408	5.59623	-0.397216	5.51062	-2.06684	0.044922	0.446935	-3.93148	5.27702	5.67414
CLEC19A	All Targets	RNA	Endogenous	1	1	35	16	11.5513	1	1	728276	FALSE	0.188778	5.24216	-0.43069	5.14638	-2.06636	0.0449691	0.446935	-3.93632	4.92689	5.30003
XBP1	All Targets	RNA	Endogenous	1	3	82	24	20.8412	1	1	7494	FALSE	0.35801	6.00592	-0.396942	5.94801	-2.06634	0.044971	0.446935	-3.9729	5.73448	6.09748
OR10H2	All Targets	RNA	Endogenous	1	3	45	21	17.6859	1	1	26538	FALSE	-0.144463	5.7922	-0.36772	5.71278	-2.06598	0.045007	0.447046	-3.99253	5.49947	5.8621
TMEM221	All Targets	RNA	Endogenous	1	5	47	19	16.3929	1	1	100130519	FALSE	0.0183044	5.69008	0.385745	5.60287	2.06561	0.0450435	0.447162	-3.99703	5.85363	5.42735
COG3	All Targets	RNA	Endogenous	1	1	65	16	13.5655	1	1	83548	FALSE	0.438457	5.45463	-0.466767	5.37504	-2.06604	0.0451352	0.447172	-3.95038	5.07754	5.58329
WNT10A	All Targets	RNA	Endogenous	1	8	70	26	27.2391	1	1	80326	FALSE	-0.287481	6.36666	0.345592	6.31511	2.06466	0.0451377	0.447172	-4.0548	6.51846	6.17277
DEFB113	All Targets	RNA	Endogenous	1	2	41	17	13.143	1	1	245927	FALSE	0.468678	5.40364	-0.439238	5.31309	-2.06457	0.0451464	0.447172	-3.94171	5.01298	5.52316
CEBPG	All Targets	RNA	Endogenous	1	5	58	21	19.9825	1	1	1054	FALSE	-0.078141	5.94987	-0.40695	5.88577	-2.06439	0.0451651	0.447172	-3.96678	5.63342	6.06241
CPS1	All Targets	RNA	Endogenous	1	3	41	21	17.1827	1	1	1373	FALSE	0.0770884	5.75379	-0.405731	5.67394	-2.06419	0.0451848	0.447172	-3.97936	5.44972	5.83089
SOX17	All Targets	RNA	Endogenous	1	3	52	21	18.1574	1	1	64321	FALSE	0.467668	5.82469	-0.402143	5.75316	-2.06363	0.0452403	0.447172	-3.98233	5.51248	5.92163
KHDRBS3	All Targets	RNA	Endogenous	1	6	135	38	32.1907	1	1	10656	FALSE	0.0113941	6.59617	-0.365522	6.55772	-2.06347	0.0452565	0.447172	-4.00431	6.34684	6.70534
BOLL	All Targets	RNA	Endogenous	1	3	42	25	16.1696	1	1	66037	FALSE	-0.457804	5.67417	-0.429196	5.59622	-2.0634	0.0452627	0.447172	-3.96173	5.29044	5.81026
USP26	All Targets	RNA	Endogenous	1	3	50	16	14.8464	1	1	83844	FALSE	-0.125487	5.55719	-0.412072	5.47333	-2.06335	0.0452676	0.447172	-3.95342	5.27101	5.61496
UBTFL1	All Targets	RNA	Endogenous	1	1	49	16	12.8804	1	1	642623	FALSE	-0.28772	5.3818	-0.438301	5.29624	-2.06269	0.045334	0.447453	-3.93356	5.00437	5.50054
CIDEA	All Targets	RNA	Endogenous	1	5	37	14	12.6992	1	1	1149	FALSE	0.154396	5.35752	0.456199	5.2481	2.06257	0.0453456	0.447453	-3.95448	5.49505	5.07525
PDIA6	All Targets	RNA	Endogenous	1	5	121	22	21.6665	1	1	10130	FALSE	-0.0087309	6.05962	0.383142	5.99899	2.0616	0.0454429	0.447727	-3.99714	6.22286	5.84228
MAMSTR	All Targets	RNA	Endogenous	1	1	41	23	14.7187	1	1	284358	FALSE	-0.57286	5.55576	-0.400796	5.47732	-2.06135	0.0454676	0.447727	-3.96828	5.23777	5.64501
ZMYM3	All Targets	RNA	Endogenous	1	1	44	14	10.1962	1	1	9203	FALSE	0.944007	5.1123	-0.522355	5.007	-2.06636	0.0454695	0.447727	-3.90517	4.63587	5.26679
SWSAP1	All Targets	RNA	Endogenous	1	4	38	17	15.0562	1	1	126074	FALSE	-0.0158529	5.57706	-0.406546	5.48845	-2.0613	0.0454727	0.447727	-3.95674	5.27646	5.63684
KHSRP	All Targets	RNA	Endogenous	1	2	63	28	22.0904	1	1	8570	FALSE	0.0319514	6.08735	-0.393605	6.03302	-2.0605	0.045552	0.44808	-4.00899	5.7948	6.19977
CD40	All Targets	RNA	Endogenous	1	2	37	18	14.4276	1	1	958	FALSE	-0.145947	5.52549	-0.403968	5.43989	-2.06044	0.0455582	0.44808	-3.96161	5.17194	5.62745
TCEAL1	All Targets	RNA	Endogenous	1	6	50	22	20.1478	1	1	9338	FALSE	-0.368743	5.96074	0.355144	5.89156	2.05906	0.045697	0.448832	-4.05389	6.11652	5.73409
TEX43	All Targets	RNA	Endogenous	1	1	34	14	9.90916	1	1	389320	FALSE	0.668981	5.06348	0.496111	4.9343	2.05863	0.0457402	0.448832	-3.90664	5.20169	4.74713
MYBBP1A	All Targets	RNA	Endogenous	1	2	45	15	12.9949	1	1	10514	FALSE	0.197393	5.3914	-0.43632	5.2934	-2.05845	0.0457582	0.448832	-3.96733	5.05424	5.46081
ZW10	All Targets	RNA	Endogenous	1	1	48	19	15.3425	1	1	9183	FALSE	-0.769893	5.61138	-0.382899	5.53255	-2.05838	0.0457652	0.448832	-3.99252	5.31558	5.68444
FBXO45	All Targets	RNA	Endogenous	1	1	35	20	13.4183	1	1	200933	FALSE	0.0607034	5.43752	-0.419995	5.35409	-2.0582	0.0457827	0.448832	-3.96938	5.05666	5.5623
BLK	All Targets	RNA	Endogenous	1	1	33	15	12.542	1	1	640	FALSE	0.475753	5.35536	-0.447189	5.26449	-2.05812	0.0457911	0.448832	-3.96719	4.95185	5.48333
STARD13	All Targets	RNA	Endogenous	1	5	82	28	23.5067	1	1	90627	FALSE	-0.266546	6.16637	-0.378599	6.11561	-2.05794	0.0458088	0.448832	-3.97914	5.88603	6.27632
OXA1L	All Targets	RNA	Endogenous	1	2	40	23	14.9163	1	1	5018	FALSE	0.141237	5.56601	-0.418133	5.49051	-2.05741	0.0458626	0.44907	-3.95434	5.20274	5.69194
SUPT7L	All Targets	RNA	Endogenous	1	1519	23544	7495	6255.16	1	1	9913	FALSE	-0.378842	14.1265	0.465889	14.1263	2.05721	0.0458829	0.44907	-3.88946	14.3989	13.9354
RNASE2	All Targets	RNA	Endogenous	1	4	41	16	15.3094	1	1	6036	FALSE	-0.558349	5.59664	0.36261	5.51029	2.05648	0.0459562	0.449119	-4.00583	5.73733	5.35137
UST	All Targets	RNA	Endogenous	1	4	55	21	19.1068	1	1	10090	FALSE	0.24053	5.89095	-0.478962	5.8244	-2.06232	0.0459593	0.449119	-3.96701	5.5516	6.01536
NAAA	All Targets	RNA	Endogenous	1	5	49	21	20.1377	1	1	27163	FALSE	0.215302	5.96026	0.339916	5.89048	2.05597	0.0460078	0.449119	-4.06333	6.10863	5.73778
WFDC9	All Targets	RNA	Endogenous	1	1	35	18	15.7616	1	1	259240	FALSE	-1.26993	5.64559	-0.364907	5.56977	-2.05579	0.0460257	0.449119	-3.99732	5.35559	5.71969
NPTN	All Targets	RNA	Endogenous	1	6	50	25	20.5658	1	1	27020	FALSE	-0.141116	5.98704	0.347763	5.91959	2.05573	0.046032	0.449119	-4.05994	6.10223	5.79174
ZNF2	All Targets	RNA	Endogenous	1	4	47	17	15.365	1	1	7549	FALSE	0.62952	5.60542	0.411663	5.51613	2.05559	0.0460459	0.449119	-4.00795	5.7743	5.33541
ATP5MG	All Targets	RNA	Endogenous	1	24	1401	93	157.265	1	1	10632	FALSE	-1.02007	8.83296	0.394335	8.82138	2.05543	0.0460622	0.449119	-4.00616	9.07451	8.6442
BMX	All Targets	RNA	Endogenous	1	3	42	20	15.8428	1	1	660	FALSE	-0.179896	5.64752	0.399645	5.5634	2.0549	0.0461155	0.449265	-4.01608	5.80701	5.39287
SLC12A6	All Targets	RNA	Endogenous	1	3	39	14	13.8093	1	1	9990	FALSE	0.482628	5.47367	0.440392	5.36925	2.05512	0.0461939	0.449265	-3.99662	5.63889	5.1805
C10orf71	All Targets	RNA	Endogenous	1	1	35	17	13.3038	1	1	118461	FALSE	-0.448711	5.42587	-0.411417	5.33411	-2.05406	0.0462007	0.449265	-3.97702	5.10092	5.49735
SLC39A6	All Targets	RNA	Endogenous	1	3	63	24	20.913	1	1	25800	FALSE	-0.140654	6.01079	-0.375151	5.95064	-2.05404	0.0462028	0.449265	-4.013	5.71549	6.11524
EMC9	All Targets	RNA	Endogenous	1	1	38	16	14.1631	1	1	51016	FALSE	0.79062	5.51132	-0.450795	5.42374	-2.0534	0.0462673	0.449265	-3.9747	5.15993	5.60841
CSMD1	All Targets	RNA	Endogenous	1	5	38	15	14.3616	1	1	64478	FALSE	0.282981	5.52629	0.414499	5.41531	2.05335	0.046272	0.449265	-4.02378	5.6254	5.26824
DOT1L	All Targets	RNA	Endogenous	1	4	43	19	17.2712	1	1	84444	FALSE	0.233719	5.75675	0.381342	5.67762	2.05283	0.0463256	0.449265	-4.03682	5.90831	5.51613
CRK	All Targets	RNA	Endogenous	1	3	53	23	18.3543	1	1	1398	FALSE	0.517065	5.84064	-0.441671	5.77078	-2.0527	0.0463388	0.449265	-3.9853	5.49052	5.96697
GAB2	All Targets	RNA	Endogenous	1	5	54	23	19.5046	1	1	9846	FALSE	0.00139654	5.91632	0.354927	5.84686	2.05263	0.0463458	0.449265	-4.0458	6.07499	5.68718
BCAS3	All Targets	RNA	Endogenous	1	3	64	27	24.3502	1	1	54828	FALSE	-0.15863	6.21558	-0.359683	6.16434	-2.05242	0.0463674	0.449265	-4.03421	5.9719	6.29905
NACA	All Targets	RNA	Endogenous	1	9	188	33	31.5483	1	1	4666	FALSE	0.0295674	6.57036	0.388157	6.52719	2.05191	0.0464186	0.449265	-4.06677	6.76825	6.35845
SLC36A4	All Targets	RNA	Endogenous	1	6	95	27	27.7656	1	1	120103	FALSE	0.379533	6.3971	0.360089	6.34584	2.0518	0.0464299	0.449265	-4.05899	6.5599	6.19599
PIK3R6	All Targets	RNA	Endogenous	1	2	33	12	9.93453	1	1	146850	FALSE	0.114638	5.05441	-0.477807	4.93477	-2.05143	0.0464677	0.449265	-3.92628	4.67934	5.11358
PSG1	All Targets	RNA	Endogenous	1	2	52	19	14.1792	1	1	5669	FALSE	0.216764	5.50339	-0.408869	5.42647	-2.05108	0.0465034	0.449265	-3.9676	5.15972	5.6132
CGGBP1	All Targets	RNA	Endogenous	1	8	78	25	25.24	1	1	8545	FALSE	-0.0886637	6.26433	0.377088	6.20862	2.05089	0.0465223	0.449265	-4.0754	6.43288	6.05164
TBC1D19	All Targets	RNA	Endogenous	1	1	43	18	12.9422	1	1	55296	FALSE	0.447795	5.40312	-0.496435	5.32064	-2.05915	0.0465401	0.449265	-3.9608	4.96807	5.56744
COL9A1	All Targets	RNA	Endogenous	1	1	50	17	13.6386	1	1	1297	FALSE	-0.528846	5.45485	-0.423719	5.373	-2.05045	0.0465672	0.449265	-3.96762	5.10837	5.55824
MAP7D1	All Targets	RNA	Endogenous	1	6	53	20	19.0935	1	1	55700	FALSE	-0.271786	5.88717	0.37192	5.81606	2.05029	0.046584	0.449265	-4.04226	6.03879	5.66015
AP1G2	All Targets	RNA	Endogenous	1	1	39	12	10.3436	1	1	8906	FALSE	0.845216	5.10557	-0.449153	4.99497	-2.05023	0.0465901	0.449265	-3.95977	4.75039	5.16617
PSMB7	All Targets	RNA	Endogenous	1	1	63	22	18.5225	1	1	5695	FALSE	0.1024	5.86168	-0.389015	5.80496	-2.05014	0.0465986	0.449265	-4.00357	5.56586	5.97232
SHMT2	All Targets	RNA	Endogenous	1	4	48	16	15.0051	1	1	6472	FALSE	-0.587787	5.56996	0.391542	5.48067	2.05013	0.0466002	0.449265	-4.00541	5.69563	5.3302
SLC25A15	All Targets	RNA	Endogenous	1	2	46	15	13.2316	1	1	10166	FALSE	0.887085	5.41825	-0.455269	5.32548	-2.05027	0.0466868	0.449859	-3.98362	5.0564	5.51384
ZNF708	All Targets	RNA	Endogenous	1	1	47	27	16.2118	1	1	7562	FALSE	0.260939	5.68792	-0.387053	5.61763	-2.04882	0.0467336	0.450052	-4.00286	5.39938	5.7704
DENND5A	All Targets	RNA	Endogenous	1	2	90	23	19.7057	1	1	23258	FALSE	0.475958	5.93695	0.379098	5.87234	2.0486	0.0467567	0.450052	-4.03145	6.09792	5.71443
IL6ST	All Targets	RNA	Endogenous	1	3	190	34	28.4343	1	1	3572	FALSE	-0.390674	6.43304	-0.408033	6.38964	-2.04789	0.0468287	0.450316	-4.00714	6.14058	6.56397
EPB41L3	All Targets	RNA	Endogenous	1	5	54	21	17.1404	1	1	23136	FALSE	0.62511	5.74913	0.429078	5.66854	2.04868	0.0468342	0.450316	-4.01884	5.92184	5.49123
GASK1A	All Targets	RNA	Endogenous	1	3	52	18	15.9112	1	1	729085	FALSE	0.109982	5.6525	0.442368	5.57083	2.04859	0.0468674	0.450316	-4.00593	5.85126	5.37453
FDX2	All Targets	RNA	Endogenous	1	4	51	16	13.1649	1	1	112812	FALSE	-0.0404253	5.40678	0.411935	5.30604	2.04718	0.0469017	0.450316	-3.98651	5.64408	5.06941
B4GALT6	All Targets	RNA	Endogenous	1	4	43	16	13.2504	1	1	9331	FALSE	0.332225	5.41532	0.394512	5.31159	2.0466	0.0469619	0.450316	-3.98543	5.54583	5.14763
TRIM3	All Targets	RNA	Endogenous	1	3	43	19	16.6144	1	1	10612	FALSE	0.245149	5.70541	0.40695	5.62371	2.04657	0.0469641	0.450316	-4.03806	5.83942	5.47272
GJD4	All Targets	RNA	Endogenous	1	5	39	15	14.3355	1	1	219770	FALSE	-0.182033	5.51147	0.368733	5.41661	2.04634	0.046988	0.450316	-4.00194	5.63485	5.26384
P3H2	All Targets	RNA	Endogenous	1	1	35	21	13.7058	1	1	55214	FALSE	0.425757	5.46898	-0.411074	5.37656	-2.04604	0.0470186	0.450316	-3.98454	5.10534	5.56641
ST6GAL2	All Targets	RNA	Endogenous	1	1	43	19	13.689	1	1	84620	FALSE	-0.116201	5.46299	-0.424091	5.38264	-2.04585	0.0470387	0.450316	-3.97366	5.08201	5.59309
C8orf33	All Targets	RNA	Endogenous	1	1	46	14	14.3893	1	1	65265	FALSE	0.369598	5.53079	-0.393888	5.45005	-2.04558	0.0470663	0.450316	-3.9922	5.19431	5.62907
POLR3H	All Targets	RNA	Endogenous	1	1	44	16	13.2227	1	1	171568	FALSE	-0.405824	5.42777	-0.390754	5.3501	-2.04549	0.0470757	0.450316	-3.99626	5.11794	5.51261
CCL20	All Targets	RNA	Endogenous	1	1	46	19	12.8544	1	1	6364	FALSE	-0.272248	5.38752	-0.437395	5.29679	-2.04541	0.0470837	0.450316	-3.96409	5.03628	5.47916
NUDCD2	All Targets	RNA	Endogenous	1	6	47	20	19.8405	1	1	134492	FALSE	0.309897	5.94065	0.357706	5.86854	2.04444	0.047184	0.451036	-4.07614	6.06969	5.72773
ID4	All Targets	RNA	Endogenous	1	3	89	18	16.5935	1	1	3400	FALSE	0.434827	5.70695	0.39596	5.63432	2.04413	0.0472152	0.451094	-3.99442	5.86737	5.47119
REL	All Targets	RNA	Endogenous	1	3	62	13	12.5714	1	1	5966	FALSE	-0.102942	5.3489	-0.43758	5.25457	-2.04369	0.0472614	0.451094	-3.94331	5.01794	5.42022
CBX5	All Targets	RNA	Endogenous	1	6	99	26	26.601	1	1	23468	FALSE	-0.24591	6.33368	0.363753	6.28409	2.04346	0.0472845	0.451094	-4.0638	6.49741	6.13476
ADA	All Targets	RNA	Endogenous	1	3	35	17	15.604	1	1	100	FALSE	-0.0400016	5.62376	-0.388617	5.54074	-2.04316	0.0473158	0.451094	-3.9909	5.30289	5.70723
MEST	All Targets	RNA	Endogenous	1	2	49	22	17.6654	1	1	4232	FALSE	-0.367225	5.78771	-0.381598	5.71976	-2.04314	0.0473175	0.451094	-4.0098	5.49259	5.87879
FCGBP	All Targets	RNA	Endogenous	1	4	196	24	23.8013	1	1	8857	FALSE	0.87002	6.19116	0.437519	6.13592	2.04365	0.0473512	0.451094	-4.01505	6.40622	5.94671
IGSF9B	All Targets	RNA	Endogenous	1	8	61	22	22.6208	1	1	22997	FALSE	-0.122118	6.11395	0.356581	6.05446	2.04198	0.0474384	0.451094	-4.07162	6.25938	5.91101
OLFM3	All Targets	RNA	Endogenous	1	2	33	21	13.5805	1	1	118427	FALSE	-0.145448	5.44536	-0.436265	5.35769	-2.04157	0.0474801	0.451094	-3.97894	5.03894	5.58081
SLC45A2	All Targets	RNA	Endogenous	1	1	37	16	12.5609	1	1	51151	FALSE	-0.0277659	5.35055	-0.441825	5.25763	-2.04152	0.0474862	0.451094	-3.98106	4.98702	5.44706
FCHSD1	All Targets	RNA	Endogenous	1	4	38	17	14.8928	1	1	89848	FALSE	0.286156	5.56699	0.474245	5.47138	2.05415	0.0475359	0.451094	-4.01781	5.71189	5.30302
PRNP	All Targets	RNA	Endogenous	1	6	179	35	36.7508	1	1	5621	FALSE	0.0838635	6.78127	-0.414788	6.74888	-2.04098	0.0475419	0.451094	-4.02967	6.5051	6.91952
ACSL3	All Targets	RNA	Endogenous	1	4	51	17	15.8083	1	1	2181	FALSE	-0.168692	5.64005	0.382247	5.55539	2.04078	0.047563	0.451094	-4.02993	5.78501	5.39465
CYBA	All Targets	RNA	Endogenous	1	7	92	26	21.5979	1	1	1535	FALSE	0.172149	6.05342	0.394553	5.9913	2.04067	0.0475738	0.451094	-4.06854	6.25941	5.80363
ZNF75D	All Targets	RNA	Endogenous	1	2	41	13	13.3904	1	1	7626	FALSE	0.365788	5.43817	-0.441837	5.33202	-2.04028	0.0476141	0.451094	-4.00617	5.09662	5.49681
SMCR8	All Targets	RNA	Endogenous	1	1	33	19	12.9099	1	1	140775	FALSE	0.299284	5.39225	-0.45295	5.29399	-2.03951	0.0476942	0.451094	-3.98888	5.01531	5.48907
RGS20	All Targets	RNA	Endogenous	1	2	47	15	12.7891	1	1	8601	FALSE	0.509727	5.37029	-0.434629	5.27902	-2.03946	0.0477	0.451094	-3.95848	5.01822	5.46158
CSNK1A1L	All Targets	RNA	Endogenous	1	3	49	16	15.4744	1	1	122011	FALSE	-0.212624	5.61458	-0.40698	5.5344	-2.03917	0.0477295	0.451094	-3.97439	5.28352	5.71002
ZNF800	All Targets	RNA	Endogenous	1	5	51	19	17.9389	1	1	168850	FALSE	0.216562	5.80839	-0.405765	5.73269	-2.03912	0.0477348	0.451094	-4.00206	5.50562	5.89164
CILP2	All Targets	RNA	Endogenous	1	2	44	24	14.8999	1	1	148113	FALSE	0.377022	5.56616	-0.39712	5.48776	-2.03906	0.0477415	0.451094	-4.00096	5.22987	5.66827
OR6C74	All Targets	RNA	Endogenous	1	2	54	26	20.2322	1	1	254783	FALSE	-0.0241885	5.97059	-0.360554	5.90812	-2.03863	0.0477862	0.451094	-4.0467	5.70281	6.05183
ABCC10	All Targets	RNA	Endogenous	1	3	33	18	13.4103	1	1	89845	FALSE	0.0560522	5.43171	-0.401429	5.33345	-2.03784	0.0478685	0.451094	-3.98231	5.08589	5.50674
CYP4Z1	All Targets	RNA	Endogenous	1	4	45	20	17.4254	1	1	199974	FALSE	0.043128	5.76737	-0.409477	5.69305	-2.03765	0.0478883	0.451094	-4.00104	5.4315	5.87613
FAM210B	All Targets	RNA	Endogenous	1	4	59	30	23.4525	1	1	116151	FALSE	0.797734	6.16547	0.390066	6.10742	2.03759	0.0478946	0.451094	-4.08462	6.33917	5.9452
TAS2R13	All Targets	RNA	Endogenous	1	1	35	20	14.1989	1	1	50838	FALSE	-1.35143	5.50824	-0.38735	5.42681	-2.03758	0.0478956	0.451094	-3.99619	5.17008	5.60653
XRRA1	All Targets	RNA	Endogenous	1	4	43	17	15.3799	1	1	143570	FALSE	0.0999063	5.60387	0.395489	5.51816	2.03749	0.0479052	0.451094	-4.01824	5.71839	5.37799
ZNF350	All Targets	RNA	Endogenous	1	2	51	20	18.2963	1	1	59348	FALSE	0.0526228	5.83614	0.366738	5.76535	2.0374	0.047915	0.451094	-4.07811	5.97803	5.61648
PPA1	All Targets	RNA	Endogenous	1	3	71	21	17.4101	1	1	5464	FALSE	0.0400197	5.77397	0.414603	5.69716	2.03721	0.047935	0.451094	-4.04771	5.99677	5.48744
ARPC5L	All Targets	RNA	Endogenous	1	1	48	14	12.8197	1	1	81873	FALSE	0.462032	5.38448	0.427758	5.28701	2.03701	0.0479554	0.451094	-4.01591	5.53634	5.11248
PTPN18	All Targets	RNA	Endogenous	1	1	51	20	15.1298	1	1	26469	FALSE	0.144039	5.5907	-0.397942	5.51739	-2.03666	0.0479924	0.451094	-4.01028	5.27579	5.68651
HCLS1	All Targets	RNA	Endogenous	1	2	98	16	16.915	1	1	3059	FALSE	0.277908	5.73403	-0.426443	5.6656	-2.03662	0.0479963	0.451094	-3.9842	5.46588	5.80539
SNCAIP	All Targets	RNA	Endogenous	1	2	44	21	17.3146	1	1	9627	FALSE	0.449095	5.7677	-0.428036	5.69222	-2.0365	0.0480085	0.451094	-4.0309	5.44444	5.86567
RADIL	All Targets	RNA	Endogenous	1	3	43	21	13.9515	1	1	55698	FALSE	0.55034	5.47705	-0.415849	5.38628	-2.03645	0.0480146	0.451094	-3.98139	5.1548	5.54832
MAGT1	All Targets	RNA	Endogenous	1	5	51	21	18.5813	1	1	84061	FALSE	-0.175415	5.85098	0.380203	5.77978	2.03613	0.0480472	0.451094	-4.04185	5.98909	5.63326
TNFRSF4	All Targets	RNA	Endogenous	1	5	34	18	15.9123	1	1	7293	FALSE	0.54763	5.65401	0.407957	5.55833	2.03604	0.0480572	0.451094	-4.0632	5.80353	5.38669
PTGR1	All Targets	RNA	Endogenous	1	1	48	15	13.4498	1	1	22949	FALSE	-0.0547325	5.44003	-0.409148	5.35334	-2.03596	0.0480653	0.451094	-3.99419	5.12106	5.51595
CACNG7	All Targets	RNA	Endogenous	1	6	50	21	19.1583	1	1	59284	FALSE	0.291248	5.89715	0.375855	5.81821	2.03546	0.0481174	0.451131	-4.09224	6.05143	5.65496
TRIM8	All Targets	RNA	Endogenous	1	5	75	26	20.7685	1	1	81603	FALSE	-0.57413	6.00043	0.35774	5.93614	2.03545	0.0481193	0.451131	-4.06122	6.16168	5.77826
TMCO3	All Targets	RNA	Endogenous	1	2	71	25	19.9127	1	1	55002	FALSE	-0.0768615	5.94729	-0.386344	5.89174	-2.03478	0.0481893	0.451365	-4.01666	5.68038	6.03969
USP7	All Targets	RNA	Endogenous	1	3	46	20	17.746	1	1	7874	FALSE	-0.148282	5.7933	0.349533	5.71511	2.03473	0.0481943	0.451365	-4.0747	5.92358	5.56919
LTN1	All Targets	RNA	Endogenous	1	2	64	23	16.1071	1	1	26046	FALSE	-0.118309	5.66678	-0.412265	5.59729	-2.0344	0.0482293	0.451458	-3.99963	5.31206	5.79695
TRIM26	All Targets	RNA	Endogenous	1	2	43	18	13.7253	1	1	7726	FALSE	0.370073	5.45939	-0.428448	5.37522	-2.03339	0.0483354	0.451771	-3.9897	5.08246	5.58016
ARMCX4	All Targets	RNA	Endogenous	1	4	58	28	18.0228	1	1	100131755	FALSE	0.0405392	5.81448	-0.423203	5.7451	-2.03253	0.0484259	0.451771	-3.99139	5.43946	5.95905
WNK1	All Targets	RNA	Endogenous	1	5	85	18	16.9626	1	1	65125	FALSE	-0.186695	5.73461	0.406067	5.6571	2.03249	0.0484302	0.451771	-4.002	5.90011	5.487
CFAP36	All Targets	RNA	Endogenous	1	3	38	20	13.3912	1	1	112942	FALSE	0.529787	5.42553	-0.420652	5.33063	-2.03243	0.0484369	0.451771	-3.97811	5.06301	5.51797
NIPSNAP3A	All Targets	RNA	Endogenous	1	1	33	12	10.775	1	1	25934	FALSE	0.763346	5.16041	-0.45053	5.04198	-2.03232	0.0484482	0.451771	-3.98639	4.83562	5.18642
BMPR1A	All Targets	RNA	Endogenous	1	4	49	19	18.0014	1	1	657	FALSE	0.0975516	5.80915	0.369983	5.73428	2.0323	0.0484506	0.451771	-4.05737	5.93614	5.59298
ZNF74	All Targets	RNA	Endogenous	1	1	39	19	13.2296	1	1	7625	FALSE	0.0544855	5.41815	-0.409663	5.33433	-2.03204	0.0484775	0.451771	-4.00896	5.07033	5.51913
ZNF223	All Targets	RNA	Endogenous	1	1	45	18	14.1231	1	1	7766	FALSE	-0.145566	5.50265	-0.380219	5.41875	-2.03186	0.0484968	0.451771	-4.02268	5.19069	5.57839
CLCN5	All Targets	RNA	Endogenous	1	2	39	16	14.3789	1	1	1184	FALSE	0.234103	5.51907	-0.423842	5.43296	-2.03172	0.0485112	0.451771	-4.01243	5.18044	5.60973
HAS1	All Targets	RNA	Endogenous	1	3	47	18	14.8284	1	1	3036	FALSE	0.0221418	5.5552	-0.403165	5.47098	-2.03171	0.0485131	0.451771	-4.00323	5.24521	5.62901
SDC2	All Targets	RNA	Endogenous	1	2	59	16	13.8205	1	1	6383	FALSE	0.499501	5.46919	0.41448	5.37588	2.03145	0.0485404	0.451791	-4.02298	5.6209	5.20436
UPK2	All Targets	RNA	Endogenous	1	1	45	17	12.9878	1	1	7379	FALSE	0.676978	5.40935	-0.510059	5.30871	-2.04381	0.0486017	0.452129	-3.98768	4.97317	5.54359
SUGT1	All Targets	RNA	Endogenous	1	2	51	27	21.7781	1	1	10910	FALSE	-0.371331	6.06988	0.388535	6.01062	2.03061	0.0486293	0.452153	-4.08788	6.22256	5.86227
TNFSF15	All Targets	RNA	Endogenous	1	2	39	19	16.7676	1	1	9966	FALSE	-0.803526	5.72072	0.332116	5.64033	2.02993	0.0487011	0.452587	-4.08959	5.82991	5.50763
PPP2R5B	All Targets	RNA	Endogenous	1	2	34	23	14.6122	1	1	5526	FALSE	-0.140243	5.53926	-0.396781	5.45652	-2.02896	0.0488035	0.453086	-4.00818	5.18729	5.64498
CD79B	All Targets	RNA	Endogenous	1	2	44	16	13.672	1	1	974	FALSE	0.47213	5.45641	-0.457964	5.36642	-2.02894	0.0488062	0.453086	-3.97502	5.04336	5.59256
KLHL3	All Targets	RNA	Endogenous	1	2	40	14	11.9395	1	1	26249	FALSE	0.671598	5.2812	-0.429098	5.18288	-2.0286	0.0488426	0.453086	-3.98485	4.88266	5.39303
ZCCHC8	All Targets	RNA	Endogenous	1	2	50	20	17.2801	1	1	55596	FALSE	0.458687	5.75921	-0.411967	5.68683	-2.02848	0.0488553	0.453086	-4.03313	5.45371	5.85001
KCTD19	All Targets	RNA	Endogenous	1	4	46	21	17.8684	1	1	146212	FALSE	0.38276	5.80355	-0.407318	5.72651	-2.02817	0.0488878	0.453155	-4.0364	5.4651	5.90949
HSPB11	All Targets	RNA	Endogenous	1	1	42	13	11.7617	1	1	51668	FALSE	-0.456023	5.27098	-0.407654	5.1765	-2.02791	0.048916	0.453182	-3.99111	4.88361	5.38153
SFMBT2	All Targets	RNA	Endogenous	1	2	53	19	16.3724	1	1	57713	FALSE	-0.162606	5.68751	-0.395336	5.61781	-2.02749	0.0489604	0.453232	-4.02514	5.38141	5.78329
RBBP8NL	All Targets	RNA	Endogenous	1	2	48	16	12.898	1	1	140893	FALSE	-0.479891	5.37704	-0.423007	5.28874	-2.02738	0.0489716	0.453232	-3.98681	5.0331	5.46769
UCP3	All Targets	RNA	Endogenous	1	3	55	21	17.8136	1	1	7352	FALSE	-0.0444073	5.79794	-0.423015	5.73178	-2.02647	0.0490687	0.453483	-4.02082	5.43923	5.93656
GJC2	All Targets	RNA	Endogenous	1	1	39	21	13.4393	1	1	57165	FALSE	0.0404648	5.43814	-0.387062	5.35933	-2.02643	0.0490735	0.453483	-4.02333	5.10652	5.53629
RRP9	All Targets	RNA	Endogenous	1	2	50	10	10.7598	1	1	9136	FALSE	-0.311757	5.15305	0.450869	5.03415	2.02642	0.0490741	0.453483	-3.97371	5.33053	4.82669
ATP6V0A2	All Targets	RNA	Endogenous	1	2	59	15	13.5055	1	1	23545	FALSE	0.318276	5.44166	-0.452102	5.35455	-2.02565	0.0491566	0.454013	-3.99762	5.01835	5.58989
YY1	All Targets	RNA	Endogenous	1	6	71	21	21.7928	1	1	7528	FALSE	0.292932	6.06479	0.372247	6.0028	2.0254	0.0491833	0.454026	-4.09031	6.22748	5.84552
LRRC47	All Targets	RNA	Endogenous	1	7	62	22	20.9664	1	1	57470	FALSE	0.0136792	6.01302	0.351787	5.94578	2.02424	0.0493074	0.454936	-4.11722	6.14102	5.80912
MAGOHB	All Targets	RNA	Endogenous	1	2	38	24	15.6179	1	1	55110	FALSE	0.0555595	5.6287	-0.406018	5.55074	-2.02401	0.0493323	0.454936	-4.03443	5.27662	5.74263
COA7	All Targets	RNA	Endogenous	1	1	45	17	13.6714	1	1	65260	FALSE	0.197575	5.46142	-0.417809	5.37663	-2.02352	0.0493851	0.45518	-4.02726	5.12234	5.55464
SELENOM	All Targets	RNA	Endogenous	1	7	61	25	20.326	1	1	140606	FALSE	0.126375	5.9727	0.362047	5.90531	2.02329	0.0494092	0.45518	-4.09015	6.12705	5.75009
SLC1A6	All Targets	RNA	Endogenous	1	5	58	18	18.4684	1	1	6511	FALSE	0.0611388	5.8437	0.371093	5.77019	2.02278	0.0494641	0.455453	-4.08541	6.00151	5.60826
PERP	All Targets	RNA	Endogenous	1	7	40	18	17.5401	1	1	64065	FALSE	0.315734	5.7763	0.374346	5.69496	2.02201	0.0495472	0.45592	-4.09208	5.9133	5.54212
SGMS2	All Targets	RNA	Endogenous	1	3	51	20	15.557	1	1	166929	FALSE	0.41788	5.62222	-0.454982	5.54522	-2.02184	0.0495653	0.45592	-4.00819	5.29117	5.72304
NEK6	All Targets	RNA	Endogenous	1	7	78	32	25.2688	1	1	10783	FALSE	-0.493587	6.26332	0.340795	6.21213	2.02069	0.049689	0.456168	-4.11076	6.42704	6.0617
PYGO2	All Targets	RNA	Endogenous	1	2	43	17	16.5311	1	1	90780	FALSE	-0.299938	5.70194	-0.403919	5.62572	-2.02064	0.0496953	0.456168	-4.04388	5.38881	5.79155
TAAR6	All Targets	RNA	Endogenous	1	2	40	19	14.6058	1	1	319100	FALSE	-0.161727	5.54221	-0.398949	5.46105	-2.02061	0.0496981	0.456168	-4.031	5.19649	5.64625
ENO1	All Targets	RNA	Endogenous	1	6	283	30	27.4202	1	1	2023	FALSE	0.365469	6.38025	0.399925	6.33103	2.02052	0.0497078	0.456168	-4.08447	6.57033	6.16351
GDI1	All Targets	RNA	Endogenous	1	4	67	20	19.9852	1	1	2664	FALSE	0.510861	5.95422	-0.381448	5.88771	-2.02009	0.049754	0.456168	-4.05268	5.64984	6.05421
TBRG1	All Targets	RNA	Endogenous	1	1	59	19	15.4853	1	1	84897	FALSE	0.0623065	5.62244	-0.416166	5.55274	-2.0199	0.0497747	0.456168	-4.0189	5.29014	5.73656
SSBP2	All Targets	RNA	Endogenous	1	3	51	16	13.6823	1	1	23635	FALSE	-0.25763	5.45106	-0.38784	5.36824	-2.0196	0.0498068	0.456168	-4.00977	5.1544	5.51793
MCM8	All Targets	RNA	Endogenous	1	6	53	11	14.6585	1	1	84515	FALSE	0.387104	5.54389	0.408166	5.44775	2.01943	0.0498252	0.456168	-4.06763	5.75065	5.23573
IFITM2	All Targets	RNA	Endogenous	1	24	292	76	73.5699	1	1	10581	FALSE	-0.378871	7.74808	0.3377	7.73	2.01932	0.0498375	0.456168	-4.12344	7.90974	7.60417
CNTLN	All Targets	RNA	Endogenous	1	15	472	71	81.6868	1	1	54875	FALSE	-0.165771	7.90077	0.367041	7.88248	2.01906	0.0498656	0.456168	-4.11217	8.09003	7.73719
SH3BGRL3	All Targets	RNA	Endogenous	1	6	181	30	26.5773	1	1	83442	FALSE	0.0477011	6.33383	0.370455	6.28329	2.01887	0.0498862	0.456168	-4.10666	6.51696	6.11973
DIS3	All Targets	RNA	Endogenous	1	5	56	22	16.4578	1	1	22894	FALSE	-0.142095	5.69101	0.382442	5.61214	2.01878	0.0498957	0.456168	-4.06675	5.85756	5.44035
SYNCRIP	All Targets	RNA	Endogenous	1	4	76	24	20.6904	1	1	10492	FALSE	0.0922254	5.99488	0.36024	5.93483	2.01824	0.0499543	0.456472	-4.07226	6.15123	5.78334
RHOV	All Targets	RNA	Endogenous	1	2	42	21	16.7704	1	1	171177	FALSE	0.136361	5.72208	-0.436408	5.64815	-2.0177	0.0500123	0.456656	-4.04553	5.36852	5.84389
KIAA1841	All Targets	RNA	Endogenous	1	2	58	20	15.3939	1	1	84542	FALSE	0.0367625	5.60718	-0.38134	5.5278	-2.01759	0.0500251	0.456656	-4.03548	5.32846	5.66734
RPL18A	All Targets	RNA	Endogenous	1	13	421	46	50.594	1	1	6142	FALSE	0.657876	7.22479	0.33095	7.19732	2.01724	0.050063	0.456771	-4.14355	7.40813	7.04976
AFMID	All Targets	RNA	Endogenous	1	4	47	14	14.1904	1	1	125061	FALSE	-0.179555	5.50039	0.411552	5.40563	2.01686	0.0501039	0.456913	-4.06648	5.71655	5.18798
ZNF729	All Targets	RNA	Endogenous	1	1	39	18	13.9833	1	1	100287226	FALSE	0.366407	5.492	-0.395937	5.40632	-2.01492	0.0503153	0.45785	-4.03828	5.16889	5.57252
ZNF215	All Targets	RNA	Endogenous	1	1	38	23	15.6535	1	1	7762	FALSE	0.0323793	5.63603	-0.385426	5.56274	-2.01482	0.0503263	0.45785	-4.05549	5.33907	5.71931
PES1	All Targets	RNA	Endogenous	1	2	50	18	13.6284	1	1	23481	FALSE	0.638643	5.45285	-0.475807	5.36252	-2.01952	0.0503307	0.45785	-4.02569	5.09018	5.55316
TMEM258	All Targets	RNA	Endogenous	1	3	87	28	21.0787	1	1	746	FALSE	-0.0278454	6.02169	0.366289	5.95984	2.01477	0.050332	0.45785	-4.1114	6.1747	5.80943
R3HCC1	All Targets	RNA	Endogenous	1	2	49	20	13.9429	1	1	203069	FALSE	0.0246878	5.4768	-0.399592	5.39221	-2.01475	0.0503335	0.45785	-4.01533	5.14836	5.56291
ZNF573	All Targets	RNA	Endogenous	1	5	63	25	22.9484	1	1	126231	FALSE	-0.230522	6.13387	0.350791	6.07519	2.01432	0.0503809	0.458049	-4.11105	6.27865	5.93277
WDR86	All Targets	RNA	Endogenous	1	6	44	28	21.807	1	1	349136	FALSE	-0.08654	6.06534	0.364912	6.00264	2.01395	0.050421	0.458183	-4.11748	6.20452	5.86132
SMIM21	All Targets	RNA	Endogenous	1	1	41	18	13.3997	1	1	284274	FALSE	0.511638	5.435	-0.420753	5.34949	-2.0129	0.0505365	0.458879	-4.02475	5.0806	5.53771
SEPTIN8	All Targets	RNA	Endogenous	1	6	56	22	18.0272	1	1	23176	FALSE	-0.250116	5.81075	0.354279	5.73627	2.01245	0.0505857	0.458879	-4.10147	5.93952	5.594
SRD5A1	All Targets	RNA	Endogenous	1	4	64	20	19.8189	1	1	6715	FALSE	-0.450091	5.93827	-0.410741	5.87632	-2.01235	0.0505962	0.458879	-4.04744	5.60241	6.06806
SEPTIN9	All Targets	RNA	Endogenous	1	12	113	40	35.4052	1	1	10801	FALSE	-0.416553	6.72688	0.339079	6.68685	2.01215	0.0506177	0.458879	-4.1853	6.87237	6.55698
PFDN4	All Targets	RNA	Endogenous	1	6	48	25	19.7754	1	1	5203	FALSE	-0.100256	5.93382	0.364478	5.86498	2.01206	0.0506281	0.458879	-4.11415	6.07878	5.71532
SALL2	All Targets	RNA	Endogenous	1	1	39	15	10.8313	1	1	6297	FALSE	0.45597	5.1675	-0.450958	5.06256	-2.01186	0.0506502	0.458879	-4.00477	4.81031	5.23914
EXOC5	All Targets	RNA	Endogenous	1	1	55	23	18.604	1	1	10640	FALSE	-0.77499	5.86682	-0.352139	5.80266	-2.01151	0.0506884	0.458983	-4.10595	5.59729	5.94642
PRKG1	All Targets	RNA	Endogenous	1	4	36	17	14.5034	1	1	5592	FALSE	0.674723	5.52852	0.423553	5.43494	2.01129	0.0507125	0.458983	-4.06178	5.68245	5.26168
BBX	All Targets	RNA	Endogenous	1	1	53	21	15.6275	1	1	56987	FALSE	0.390896	5.64268	-0.406602	5.56366	-2.00971	0.0508868	0.460329	-4.05416	5.32568	5.73025
EPS8L3	All Targets	RNA	Endogenous	1	1	35	16	11.5385	1	1	79574	FALSE	0.0768846	5.24153	-0.431054	5.14473	-2.00932	0.0509291	0.460348	-4.02731	4.85361	5.34851
GPATCH4	All Targets	RNA	Endogenous	1	1	41	14	11.6222	1	1	54865	FALSE	0.444038	5.26278	-0.424667	5.16906	-2.00888	0.050978	0.460348	-4.03508	4.89831	5.35859
ISG20	All Targets	RNA	Endogenous	1	3	75	23	21.7149	1	1	3669	FALSE	-0.017535	6.06222	-0.361368	6.00585	-2.00851	0.0510192	0.460348	-4.08781	5.79874	6.15083
HMSD	All Targets	RNA	Endogenous	1	3	40	11	12.6933	1	1	284293	FALSE	0.932849	5.36323	0.443773	5.25217	2.00863	0.0510281	0.460348	-4.05012	5.56755	5.03139
[truncated: 16,040 more rows]
