# Supplementary material for: Spatial Transcriptomics of Perineural Invasion in Pancreatic Ductal Adenocarcinomas
Source: Research Square preprint supplement (doi:10.21203/rs.3.rs-5253213/v1), 2024-12-02
Supplement: Supplementary file 8 [file fbab74acf0882dad5d621e2a.xlsx]

## Sheet: CloudDSP_RawData_151AOI
Supplementary Table 2. Raw expression counts from DSP GeoMX.
TargetName	1993|001|PanCK	1993|001|PGP9.5	1993|004|PanCK	1993|004|PGP9.5	1993|005|PanCK	1993|006|PanCK	1993|008|PGP9.5	1993|010|PanCK	1993|010|PGP9.5	2920|001|PGP9.5	2920|001|PanCK	2920|002|PanCK	2920|003|PGP9.5	2920|003|PanCK	2920|004|PGP9.5	2920|005|PGP9.5	2920|006|PGP9.5	2920|007|PanCK	2920|008|PanCK	2343|001|PGP9.5	2343|001|PanCK	2343|002|PanCK	2343|003|PanCK	2343|004|PanCK	2343|005|FullROI	2343|006|FullROI	2343|008|PanCK	3435|001|PanCK	3435|002|PGP9.5	3435|004|PanCK	3435|005|PanCK	3435|006|PanCK	3435|007|PanCK	3435|008|PGP9.5	3435|008|PanCK	3435|010|PGP9.5	3435|011|PGP9.5	3435|011|PanCK	3435|012|PGP9.5	3435|012|PanCK	3435|013|PGP9.5	3435|013|PanCK	3435|014|PGP9.5	3435|015|PanCK	3435|016|PGP9.5	1877|002|PGP9.5	1877|002|PanCK	1877|003|PanCK	1877|004|PGP9.5
A1BG	15	15	11	35	43	34	13	20	21	6	1	1	3	1	6	1	1	5	2	5	15	18	15	19	26	24	22	11	4	12	4	3	1	1	5	1	5	3	4	4	1	3	3	1	1	1	1	12	1
A1CF	21	13	22	39	54	55	13	16	19	4	5	2	2	3	3	1	1	3	5	10	21	15	28	19	20	22	33	24	8	23	9	7	1	5	14	1	2	5	4	3	4	2	2	3	2	2	4	8	2
A2M	27	58	24	117	89	80	40	25	79	38	5	14	58	1	38	24	25	27	2	76	31	19	28	22	65	35	37	21	42	14	9	10	1	26	12	1	90	7	69	8	39	1	37	16	59	3	3	8	1
A2ML1	3	6	11	24	25	26	7	9	14	1	1	1	3	1	3	1	1	2	1	10	13	9	7	11	24	15	11	5	2	6	2	7	1	1	6	2	3	1	3	3	1	1	1	2	3	2	4	5	1
A3GALT2	8	9	10	19	50	32	6	9	15	1	1	1	2	1	8	1	1	2	1	11	6	11	7	15	24	17	15	4	5	7	3	3	1	3	10	3	9	1	3	1	1	1	1	7	2	2	1	6	1
A4GALT	140	58	117	177	217	321	41	142	111	1	4	8	2	2	2	2	1	11	5	14	58	49	37	32	35	25	45	12	4	18	8	8	1	5	11	1	7	5	4	11	4	6	2	9	3	3	3	13	2
A4GNT	7	12	16	38	48	42	14	12	22	1	3	4	3	1	3	1	2	1	1	13	17	15	17	17	20	21	20	6	2	6	8	3	1	2	5	1	10	1	2	5	2	2	4	7	1	1	1	5	1
AAAS	19	18	29	52	68	69	74	22	22	2	10	6	3	7	5	1	1	10	5	16	31	31	37	27	39	28	36	11	9	22	6	9	1	3	18	2	6	4	8	5	7	3	3	9	4	3	3	10	2
AACS	14	9	26	35	45	53	13	25	20	1	5	3	2	1	4	5	4	1	1	12	48	43	41	29	29	26	50	14	2	15	13	7	1	5	14	1	8	2	5	6	2	3	4	4	4	2	2	8	1
AADAC	15	5	12	31	30	40	9	17	18	2	3	3	3	1	4	1	1	1	1	3	49	39	15	21	22	14	40	12	1	44	12	13	1	2	6	1	3	13	4	16	3	27	3	4	2	2	4	5	1
AADACL2	10	8	11	46	43	44	10	17	13	2	3	2	7	1	5	4	1	3	1	12	11	21	15	27	38	28	31	4	3	9	5	3	1	1	9	1	2	1	2	1	1	2	1	7	3	1	1	8	1
AADACL3	14	9	26	34	34	59	14	17	22	1	1	2	1	1	2	1	1	1	1	13	16	12	13	18	24	22	31	4	4	3	7	2	1	1	8	1	10	1	4	1	2	1	2	9	1	1	2	8	1
AADACL4	10	9	10	48	37	64	11	25	19	1	2	4	7	1	10	2	1	1	1	4	21	19	14	17	29	26	25	6	2	9	3	7	1	2	10	3	3	2	2	2	5	2	2	4	2	2	4	7	1
AADAT	14	16	18	42	61	60	14	14	19	2	2	2	1	1	3	1	2	3	5	6	6	17	17	18	28	20	22	7	5	14	6	1	1	3	8	1	7	1	4	2	5	1	2	1	4	3	5	7	2
AAGAB	28	10	36	44	83	81	4	21	35	4	12	6	4	5	5	4	2	5	9	14	61	36	31	36	14	15	52	25	7	62	14	12	1	5	14	1	12	20	9	20	3	7	1	16	4	3	3	9	1
AAK1	10	9	12	58	49	65	12	26	26	4	1	11	4	2	2	1	5	5	3	20	47	31	30	26	29	13	53	20	3	34	10	20	1	5	7	1	13	10	8	8	4	4	1	7	1	1	3	5	1
AAMDC	11	8	19	42	48	59	8	11	25	4	2	1	3	3	4	3	1	3	2	15	20	16	26	25	26	37	26	7	5	13	10	6	1	7	5	2	8	3	3	2	5	4	2	5	3	4	3	2	3
AAMP	173	70	227	234	514	761	92	168	124	13	28	42	13	12	20	15	8	46	23	47	152	90	87	68	55	42	130	86	18	127	32	42	1	18	50	8	43	43	31	37	12	23	7	30	5	4	6	18	2
AANAT	9	9	7	30	34	39	9	11	10	1	1	4	2	1	1	1	2	2	3	9	9	20	26	21	38	25	36	6	6	11	8	4	1	6	7	3	7	1	3	5	4	3	4	5	4	1	2	6	3
AAR2	16	9	15	32	53	46	7	11	17	2	2	4	4	3	5	2	2	2	1	5	20	14	16	21	18	25	22	10	5	19	6	3	1	1	12	1	7	5	4	3	3	1	1	4	1	2	2	5	1
AARD	3	6	6	40	29	35	6	15	19	1	1	1	1	1	3	2	1	1	1	4	7	10	11	9	11	17	13	4	3	5	2	2	1	1	4	1	2	1	2	1	1	1	1	1	2	3	1	9	2
AARS1	17	16	35	44	52	55	11	22	27	9	6	5	6	1	4	2	1	5	2	23	35	21	28	26	24	19	41	10	9	30	8	6	1	9	13	1	10	5	6	6	9	3	2	4	5	4	3	6	1
AARS2	9	14	14	37	32	42	11	10	22	2	3	3	1	2	4	1	1	1	3	4	19	11	12	15	25	18	23	12	8	13	5	2	1	1	8	1	2	2	7	4	3	1	1	7	1	1	2	1	4
AARSD1	12	11	19	59	54	71	11	15	24	7	9	7	1	6	9	3	4	11	3	8	24	15	23	21	36	23	29	11	5	27	8	8	1	6	10	1	8	4	9	2	2	4	1	4	5	1	4	10	2
AASDH	8	21	21	39	34	38	7	11	14	1	1	2	2	2	1	1	1	1	1	8	13	13	17	11	19	20	22	7	4	7	9	1	1	5	1	3	3	1	5	5	1	2	1	1	3	3	3	10	2
AASDHPPT	14	10	16	43	39	50	8	20	16	4	4	5	1	3	2	1	1	3	1	9	17	14	13	14	29	19	32	6	6	12	4	5	1	4	9	2	12	1	4	6	2	1	3	3	1	3	2	5	2
AASS	12	10	20	45	30	36	16	18	28	1	5	3	13	1	4	7	6	1	1	14	20	10	21	19	34	30	26	13	7	10	4	2	1	27	8	1	13	3	6	1	3	4	2	6	2	1	1	8	3
AATF	15	15	29	44	74	78	12	24	25	2	7	11	8	5	5	2	1	11	6	13	35	21	30	32	20	21	46	15	10	24	12	5	1	8	21	2	9	5	8	8	5	2	4	6	3	2	1	4	1
AATK	17	16	14	46	35	39	20	14	27	4	2	2	18	2	13	7	9	1	4	18	16	17	26	15	50	61	26	10	7	17	6	5	1	2	11	2	8	6	12	2	8	3	3	6	4	2	1	11	2
ABAT	5	8	14	31	16	24	4	15	11	3	2	1	2	1	1	1	1	1	2	11	10	12	7	14	20	15	16	3	5	10	2	3	1	2	8	2	5	1	3	1	4	1	8	4	1	3	1	8	3
ABCA1	16	16	12	84	32	34	8	13	40	2	1	3	6	1	6	3	1	1	1	21	11	19	14	23	29	23	27	4	5	9	2	3	1	3	9	1	6	1	12	2	7	4	5	4	8	1	1	2	1
ABCA10	10	12	15	44	45	41	15	12	31	7	2	1	16	1	7	1	2	2	1	6	18	21	12	12	41	38	30	9	15	9	6	4	1	1	9	3	9	2	4	1	4	1	3	3	1	1	3	9	2
ABCA12	16	11	23	31	35	46	6	12	16	2	1	2	4	3	4	2	1	1	1	9	21	25	19	19	42	28	30	2	3	8	4	4	1	1	13	2	7	3	2	5	2	2	2	3	3	3	1	7	1
ABCA13	11	10	12	43	18	32	11	4	17	3	3	1	1	1	5	4	1	2	4	10	21	18	22	29	36	21	25	10	4	12	4	6	1	3	10	4	5	3	4	8	1	1	2	6	2	6	2	9	4
ABCA2	7	18	11	49	24	31	6	10	16	3	1	3	7	1	6	3	2	1	1	12	12	8	16	15	32	24	18	5	7	10	4	2	1	3	5	1	12	1	1	3	1	4	2	3	5	1	1	5	2
ABCA3	9	7	20	34	36	34	9	15	16	2	1	1	4	1	2	1	1	1	1	12	7	11	13	9	17	10	12	5	5	8	3	2	1	4	6	1	6	1	6	2	1	2	2	3	2	1	2	8	1
ABCA4	13	13	19	41	41	56	16	12	31	2	1	2	6	1	2	1	2	3	1	10	21	16	22	20	33	24	44	12	10	7	2	3	1	3	7	2	9	1	4	2	5	1	6	5	4	2	4	4	1
ABCA5	11	12	11	33	37	49	8	10	20	3	4	2	4	3	4	2	1	4	2	6	22	22	18	15	27	15	19	11	4	18	4	5	1	6	10	1	3	6	2	4	1	1	2	5	1	2	1	7	1
ABCA6	13	7	23	36	28	37	6	18	14	7	1	3	12	1	5	1	4	1	1	15	19	15	14	19	31	30	15	6	13	8	4	3	1	4	10	1	8	1	2	6	3	1	4	4	2	1	2	9	2
ABCA7	10	11	12	23	40	38	4	12	20	1	4	3	3	2	1	1	1	1	2	12	18	19	29	24	17	19	30	15	8	29	4	3	1	1	12	2	8	5	3	9	2	1	1	6	1	1	3	6	2
ABCA8	8	29	6	38	25	43	28	7	28	28	2	2	76	1	31	15	20	3	1	40	19	13	15	16	59	55	26	5	39	5	3	5	1	5	43	1	40	4	8	2	9	1	7	4	13	4	2	6	1
ABCA9	14	16	21	26	32	49	9	12	27	5	3	1	12	1	6	2	1	4	1	10	13	13	14	24	28	23	23	3	14	5	3	5	1	5	3	3	9	2	3	5	1	3	4	3	1	1	2	7	9
ABCB1	14	16	22	38	34	40	14	18	29	1	1	2	5	2	4	2	1	2	1	6	15	14	19	22	39	24	36	12	11	26	11	5	1	4	7	2	7	3	5	4	3	2	3	6	4	2	3	6	1
ABCB10	16	17	16	40	47	49	8	17	20	1	12	10	8	6	3	2	1	5	4	15	20	26	17	23	33	32	48	12	6	35	9	6	1	1	19	2	12	7	6	7	4	2	2	4	2	2	1	6	1
ABCB11	7	11	14	29	29	43	13	6	7	2	1	1	1	2	1	1	1	1	1	10	13	20	12	13	20	17	27	10	6	10	6	1	1	2	9	1	4	1	3	1	1	1	1	7	1	1	3	3	1
ABCB4	12	10	14	28	19	34	5	5	23	1	1	2	1	1	3	2	2	1	1	10	5	13	8	15	16	17	21	7	5	6	3	2	1	2	5	1	7	1	2	2	1	1	2	3	6	4	1	5	2
ABCB5	11	38	13	95	33	41	7	14	76	5	1	1	5	1	4	1	1	1	1	86	13	7	16	13	30	23	21	8	44	7	5	2	1	5	5	1	40	1	15	4	12	1	4	6	11	1	3	14	1
ABCB6	7	14	16	41	39	35	13	13	33	3	3	5	4	2	8	3	1	3	1	10	37	25	23	24	35	16	35	12	4	19	8	4	1	5	23	3	11	3	3	5	4	2	2	2	6	3	3	9	1
ABCB7	12	8	22	41	46	50	13	9	22	2	7	6	1	4	1	1	2	6	4	10	28	21	21	14	17	23	23	7	5	12	6	4	1	3	10	1	8	3	2	7	4	4	4	4	1	1	4	8	2
ABCB8	8	7	14	31	33	54	7	14	20	2	3	5	1	1	2	2	1	3	1	10	19	15	19	20	38	14	20	7	5	9	7	6	1	8	26	3	5	5	6	3	1	3	1	5	1	1	1	8	4
ABCB9	588	289	978	1557	1408	1859	203	559	507	7	4	4	3	1	8	2	3	8	1	45	139	136	157	158	98	52	228	32	12	25	21	15	1	17	21	3	14	11	22	11	10	6	6	20	9	4	5	4	4
ABCC1	30	16	36	59	86	87	27	24	48	3	6	9	8	8	6	1	3	5	3	17	40	27	31	27	27	25	49	11	2	14	7	8	1	6	9	1	12	2	9	6	4	4	5	2	2	2	6	4	1
ABCC10	9	6	16	34	33	41	7	9	19	1	2	1	2	2	1	1	2	7	1	9	10	20	19	16	33	23	23	6	4	17	3	6	1	4	17	1	2	9	2	1	1	2	1	7	3	2	2	9	1
ABCC11	14	11	13	44	49	51	4	13	17	2	4	2	2	1	6	1	1	4	1	6	8	14	17	21	26	18	32	5	1	5	3	2	1	2	12	2	3	1	4	3	1	1	1	3	5	3	1	6	4
ABCC12	11	11	12	21	29	41	8	8	12	2	1	1	5	1	2	1	1	1	4	1	16	21	16	20	24	19	20	7	7	6	6	1	1	1	9	4	4	2	4	1	1	1	2	2	1	1	1	5	1
ABCC2	6	8	10	21	29	31	9	10	17	1	1	1	3	2	1	1	2	1	1	4	18	17	9	12	14	19	19	1	3	3	2	3	1	3	5	1	6	1	4	5	3	1	2	2	1	8	5	6	2
ABCC3	56	12	49	42	131	102	12	62	32	5	74	101	3	33	5	1	1	70	36	15	240	167	138	84	24	22	211	55	3	143	32	20	1	3	30	3	9	44	7	31	2	23	3	31	3	5	4	12	1
ABCC4	13	12	9	36	35	33	6	12	14	2	2	1	2	1	5	1	1	3	1	7	6	14	13	11	18	22	27	6	5	4	2	3	1	2	6	1	3	2	2	1	3	3	3	3	1	2	3	8	2
ABCC5	16	3	12	28	29	44	7	11	24	4	2	3	4	1	4	1	4	2	1	16	23	9	13	15	28	26	37	7	5	10	6	7	1	10	5	3	3	3	2	3	2	3	5	4	3	2	1	3	1
ABCC6	17	6	16	33	35	43	6	6	15	1	1	2	5	2	2	1	1	1	1	5	13	10	10	11	18	14	21	9	3	14	5	1	1	1	15	3	8	3	1	1	1	1	1	2	1	5	1	8	4
ABCC8	9	11	15	41	26	38	10	10	23	1	1	1	3	1	4	1	1	2	1	10	10	14	17	16	23	31	22	11	8	10	3	1	1	4	9	1	9	4	7	4	2	2	4	6	1	11	1	11	11
ABCC9	10	5	15	26	21	39	4	11	12	1	1	4	1	2	1	1	2	1	1	15	16	13	14	14	36	26	29	7	2	3	6	3	1	4	14	1	4	1	1	3	3	1	1	3	1	2	1	4	1
ABCD1	22	11	20	37	42	42	14	19	29	4	3	7	1	2	2	1	1	4	5	7	15	22	19	20	23	17	30	18	2	15	7	4	1	2	6	1	8	7	6	10	3	2	2	6	6	3	4	4	1
ABCD2	11	9	19	53	41	52	6	18	22	1	3	1	1	1	9	1	1	1	1	9	20	20	25	20	29	27	26	4	5	8	4	4	1	1	3	4	3	1	1	5	3	1	2	6	2	1	1	2	3
ABCD3	17	17	23	54	52	67	10	26	26	3	5	6	4	1	6	2	2	5	3	18	23	34	20	26	42	38	37	13	10	43	19	10	1	7	17	1	13	3	8	3	9	2	2	6	5	1	2	5	2
ABCD4	13	8	19	34	51	42	12	16	22	3	3	4	3	1	2	2	2	7	1	11	20	20	20	23	27	22	27	15	8	33	7	7	1	4	9	2	3	5	5	7	1	5	3	11	2	1	1	4	1
ABCE1	25	19	21	41	73	68	16	13	26	6	3	6	4	2	1	2	1	3	2	15	12	15	17	26	35	26	24	9	5	18	8	5	1	4	13	1	5	6	2	2	1	1	3	1	2	2	1	7	2
ABCF1	13	17	25	50	49	83	9	19	15	3	6	4	2	7	2	1	1	6	3	11	29	15	20	23	30	19	27	13	7	13	11	4	1	8	5	1	7	3	5	3	5	7	2	10	1	1	3	5	2
ABCF2	25	14	27	48	35	45	15	17	14	5	4	5	12	5	6	4	4	4	6	15	25	37	27	25	31	22	37	16	6	54	16	15	1	7	12	1	8	10	11	8	8	7	2	9	5	1	1	5	3
ABCF3	15	13	21	49	57	66	13	15	35	2	1	7	5	1	4	1	2	3	4	12	25	22	24	22	25	19	37	13	5	22	5	4	1	6	13	1	9	5	5	4	1	3	5	10	3	4	2	6	1
ABCG1	20	16	30	54	44	80	11	17	26	2	2	4	1	1	6	1	1	3	1	11	31	17	23	21	33	24	31	15	2	19	7	3	1	5	14	3	6	4	10	3	5	5	1	9	5	1	2	9	3
ABCG2	8	4	5	24	21	22	7	15	12	1	1	1	4	1	8	1	1	1	1	4	15	11	6	14	17	11	23	1	2	5	7	1	1	1	1	1	3	1	1	1	2	1	4	2	2	1	1	3	1
ABCG4	17	10	27	28	99	56	6	16	26	1	1	1	3	1	6	1	1	1	1	11	17	13	14	26	16	13	17	5	8	5	5	3	1	2	5	2	3	1	2	1	2	1	1	1	1	1	1	1	1
ABCG5	12	10	19	31	36	32	10	16	29	1	1	1	2	1	6	2	1	1	1	5	21	18	18	19	35	20	38	15	7	10	4	9	1	3	9	1	5	1	5	5	1	2	4	5	4	1	2	10	1
ABCG8	14	11	20	31	45	45	11	13	16	3	4	1	4	1	3	1	1	2	1	6	21	15	23	32	31	17	32	3	5	10	3	1	1	2	10	3	5	3	5	5	1	1	4	8	3	3	1	6	2
ABHD1	13	5	19	33	48	49	10	18	21	1	1	1	5	1	4	1	1	3	1	10	17	16	23	23	29	24	23	9	7	7	9	3	1	2	16	1	3	2	2	2	4	3	4	3	5	3	3	7	1
ABHD10	18	15	16	26	50	65	5	19	24	1	1	3	2	1	4	1	1	2	1	3	7	8	14	21	18	23	14	6	4	11	9	1	1	3	6	1	6	1	1	1	1	1	1	3	2	1	1	3	2
ABHD11	16	7	27	30	65	68	11	22	7	1	26	31	2	23	5	1	2	30	14	13	52	33	20	38	20	28	56	86	10	122	27	30	1	1	33	1	7	34	3	49	6	26	1	40	1	3	4	12	3
ABHD12	8	17	16	58	37	39	14	18	21	9	3	5	6	2	7	1	2	9	4	12	29	20	21	22	31	33	30	15	4	20	8	6	1	4	16	1	12	4	5	4	5	3	3	3	7	1	5	16	3
ABHD12B	12	10	17	44	24	30	8	14	17	4	1	1	1	1	2	1	1	1	1	9	17	12	12	15	29	20	18	5	3	6	2	3	1	3	5	3	9	1	3	2	1	3	6	3	4	2	3	5	1
ABHD13	11	15	5	39	26	35	6	13	4	1	3	3	8	1	1	1	1	11	1	6	11	17	18	24	16	23	26	10	2	19	6	4	1	4	11	1	3	2	2	7	3	3	1	7	1	3	6	2	1
ABHD14A	11	4	8	39	27	30	11	7	15	1	1	2	2	2	6	1	1	1	2	10	9	12	18	10	36	21	32	3	3	7	9	5	1	3	8	3	2	3	2	3	1	2	2	6	3	4	2	2	4
ABHD14B	13	17	24	49	50	50	7	17	23	6	11	13	7	2	4	2	2	8	6	14	23	25	16	20	26	28	28	19	7	41	17	15	1	8	15	1	12	11	4	9	2	3	7	12	1	4	1	7	3
ABHD15	12	10	23	28	30	38	10	14	19	2	6	5	2	1	9	1	1	1	1	13	12	22	18	19	25	18	23	7	7	10	4	2	1	2	9	1	12	3	3	1	3	9	2	2	2	1	2	8	1
ABHD16A	5698	2369	4301	5053	9207	13136	2050	5401	4328	20	24	40	26	16	19	11	8	40	17	245	665	525	471	445	185	140	705	124	55	212	104	79	1	42	58	4	69	55	39	63	32	39	19	69	21	18	14	15	8
ABHD16B	13	8	24	55	38	49	11	17	21	2	1	4	2	1	3	1	2	2	1	16	18	18	17	23	35	19	36	5	5	13	7	6	1	2	31	3	5	2	8	1	1	3	2	3	1	1	3	2	1
ABHD17A	24	10	38	63	74	97	15	22	27	8	8	12	14	2	10	3	2	11	5	17	67	36	35	41	37	33	59	38	9	59	18	23	1	11	19	8	15	7	15	9	6	4	7	12	4	1	3	8	2
ABHD17B	14	15	17	50	46	60	9	19	27	2	3	6	7	3	6	1	1	3	1	6	20	21	21	25	26	26	47	14	8	18	11	5	1	6	9	2	10	9	10	8	3	3	5	4	4	3	1	3	2
ABHD17C	68	12	105	43	149	248	13	53	29	2	16	22	3	10	2	1	2	24	5	9	88	58	54	46	24	21	77	68	4	155	29	16	1	6	32	2	12	25	7	47	8	16	2	26	1	2	1	5	1
ABHD18	33	16	41	64	78	100	17	35	47	1	5	7	5	4	7	3	1	7	4	12	36	26	24	29	34	20	40	24	3	49	10	10	1	6	14	3	9	11	7	9	1	3	1	11	10	1	1	3	4
ABHD2	89	24	103	98	173	250	11	100	33	6	9	26	15	7	7	6	6	12	6	26	225	177	108	121	33	31	165	99	19	211	73	24	1	17	61	2	28	53	25	67	8	26	2	21	12	19	7	5	3
ABHD3	14	15	13	35	30	37	10	14	20	1	1	2	5	1	6	1	2	7	3	6	30	11	24	25	31	16	27	12	7	20	4	6	1	1	10	1	2	8	1	9	1	3	5	6	4	1	5	7	1
ABHD4	10	8	14	38	24	36	3	2	11	1	8	7	5	1	9	1	1	2	2	9	16	18	7	19	18	17	26	9	3	8	8	4	1	5	4	1	6	3	5	1	2	1	4	3	2	4	4	6	1
ABHD5	13	10	14	39	40	54	5	12	14	3	2	3	4	2	7	3	2	3	1	12	20	14	13	27	22	27	30	9	6	17	5	7	1	3	17	2	6	3	11	4	5	3	4	4	2	1	2	5	3
ABHD6	16	13	17	43	44	49	8	6	21	2	2	2	4	1	7	2	2	2	2	13	21	16	17	23	26	19	27	13	4	10	4	6	1	4	14	2	7	2	4	6	2	1	2	5	1	2	2	7	1
ABHD8	21	18	25	67	54	59	16	16	32	3	3	3	7	1	8	1	1	5	2	9	31	31	27	32	53	49	24	13	5	16	4	9	1	1	14	2	12	4	6	7	3	4	6	10	7	1	1	10	2
ABI1	43	26	65	87	100	152	23	46	59	11	18	15	9	7	8	7	3	12	7	30	98	69	47	55	34	38	82	69	12	86	38	33	1	6	35	1	12	32	10	43	9	27	6	27	9	5	5	10	1
ABI2	6	16	15	36	52	37	12	11	22	8	7	7	3	4	1	7	2	7	3	13	20	23	34	31	27	21	41	10	11	23	7	9	1	4	9	3	14	6	14	7	9	2	2	8	1	3	3	4	1
ABI3	182	80	321	527	546	634	66	152	159	5	4	3	3	3	4	3	1	4	3	19	50	53	41	58	39	31	85	15	3	19	11	8	1	6	46	2	9	8	3	10	3	3	2	12	3	1	5	15	1
ABI3BP	8	5	8	29	21	33	2	6	13	2	1	1	2	1	3	1	1	1	1	6	10	16	25	17	23	20	29	10	7	12	9	3	1	2	8	1	11	1	4	2	3	1	5	2	2	1	2	7	1
ABITRAM	79	34	58	98	149	276	40	77	75	7	9	19	10	5	9	2	4	10	13	23	76	65	68	61	40	29	89	37	6	78	18	18	1	12	26	1	10	22	9	22	8	8	3	18	2	3	5	5	2
ABL1	13	12	21	34	32	43	12	14	24	3	6	8	9	4	9	7	6	9	2	13	18	23	21	22	24	19	27	11	15	19	12	7	1	3	10	3	18	5	19	4	8	5	3	7	3	1	6	6	2
ABL2	10	33	20	41	39	57	21	7	23	3	5	4	11	4	9	12	4	3	1	29	16	18	15	22	26	19	21	8	20	22	6	6	1	3	8	2	27	2	29	4	10	8	5	5	6	3	1	6	1
ABLIM1	18	13	29	37	81	68	14	19	21	2	13	18	10	7	6	1	3	13	6	17	55	38	54	52	27	34	70	27	10	46	12	10	1	1	15	1	14	14	11	8	2	7	4	8	1	1	2	5	1
ABLIM2	12	7	21	33	37	44	10	9	22	1	1	1	1	1	1	1	1	2	1	10	23	20	23	15	22	20	27	9	2	8	4	1	1	5	4	1	4	5	3	1	1	3	2	4	1	1	5	4	2
ABLIM3	19	24	19	78	51	100	13	19	28	6	4	7	12	4	7	6	5	9	4	20	33	33	33	39	36	24	37	9	39	14	9	5	1	7	10	1	22	4	13	7	8	3	7	9	15	1	14	23	3
ABO	20	11	24	37	51	46	8	18	22	1	5	6	6	3	3	2	1	9	4	9	17	27	30	31	28	15	41	13	2	45	12	9	1	3	12	2	8	15	2	8	3	7	2	8	2	1	5	11	1
ABR	40	25	33	81	89	101	13	41	44	9	19	26	9	12	7	6	5	41	15	13	63	40	39	41	20	32	46	36	2	84	16	24	1	9	25	2	12	24	12	37	9	34	2	23	4	2	3	9	6
ABRA	3	7	10	29	25	27	7	13	26	1	1	1	1	1	2	1	1	1	1	10	15	14	16	13	19	19	28	9	5	7	1	2	1	2	7	2	8	1	5	1	1	1	1	4	5	1	1	2	2
ABRACL	22	11	28	60	56	74	10	31	15	6	20	27	6	12	7	6	1	38	23	12	55	59	44	48	17	21	65	25	4	73	16	26	1	7	22	1	11	11	7	21	7	15	2	15	1	1	2	6	1
ABRAXAS1	11	10	16	33	41	61	12	17	17	1	1	6	1	1	3	2	1	3	2	10	12	19	16	21	25	19	22	9	8	7	7	2	1	2	11	1	6	2	5	3	1	1	3	3	4	1	3	6	4
ABRAXAS2	16	14	27	45	61	64	12	12	32	1	6	9	4	3	6	3	1	4	2	15	39	27	27	41	35	24	47	24	4	22	10	6	1	5	15	2	8	5	6	1	6	1	3	10	5	1	4	2	3
ABT1	10	10	15	37	39	46	8	11	19	1	1	1	2	1	5	1	1	1	2	5	13	15	13	15	28	16	20	2	1	6	3	4	1	1	7	3	4	4	3	2	5	1	3	4	1	3	2	5	2
ABTB1	17	9	16	42	44	53	78	21	30	3	12	7	6	1	8	1	2	10	6	16	62	36	32	41	32	37	76	18	8	47	10	19	1	2	20	1	11	16	5	17	5	2	2	7	3	1	4	6	1
ABTB2	18	9	21	59	48	86	10	27	31	1	1	7	2	3	6	1	2	8	2	13	51	25	26	33	33	29	39	11	4	12	5	7	1	4	9	1	8	1	6	22	2	11	1	8	1	1	2	4	1
ACAA1	40	23	42	76	113	135	23	50	30	7	17	12	4	4	5	8	2	16	6	24	44	29	40	23	23	24	40	18	2	37	12	7	1	5	29	1	13	15	8	6	6	4	3	17	5	7	5	13	8
ACAA2	13	14	31	44	41	58	14	14	20	1	5	10	6	7	7	4	2	15	6	12	30	19	25	24	40	24	31	7	6	16	12	6	1	7	15	1	9	3	2	4	3	3	5	4	5	3	2	6	1
ACACA	7	7	19	29	46	23	14	15	25	1	8	6	2	2	4	1	1	4	3	8	38	23	26	20	24	22	26	10	3	18	10	5	1	3	12	1	6	5	5	5	2	3	1	6	2	1	2	11	1
ACACB	16	8	24	29	41	41	13	14	16	4	1	1	4	1	4	3	1	1	2	8	18	24	24	22	38	24	24	6	3	12	9	1	1	2	15	1	7	2	3	2	2	3	1	6	3	3	4	5	1
ACAD10	14	9	15	33	35	42	9	19	28	2	4	5	5	1	2	1	2	4	1	13	31	23	25	18	31	18	36	13	7	24	4	5	1	2	11	1	8	7	5	10	3	1	2	1	2	1	4	3	3
ACAD11	9	12	10	25	35	40	10	11	21	4	1	1	2	1	5	1	3	1	1	9	20	24	20	11	31	24	29	5	6	6	5	9	1	2	7	3	6	3	5	1	3	3	5	3	2	1	1	6	2
ACAD8	16	15	15	46	58	66	9	14	19	4	2	3	1	3	2	1	1	5	4	7	28	22	20	24	26	23	36	9	7	13	8	3	1	2	12	5	3	6	5	6	5	6	4	4	6	2	5	11	2
ACAD9	99	64	101	138	178	311	42	113	102	4	6	11	2	3	3	2	4	9	1	24	71	64	56	62	30	29	84	23	11	42	8	8	1	7	18	1	16	14	14	10	5	4	1	13	7	5	4	12	2
ACADL	21	9	20	47	40	39	11	14	23	2	1	5	4	1	7	2	3	1	1	9	15	23	18	21	44	34	18	6	7	7	3	4	1	2	5	3	4	3	1	2	4	1	4	3	2	3	3	10	1
ACADM	14	10	11	45	36	47	12	13	43	4	8	3	4	2	6	4	1	7	6	8	41	20	27	28	36	46	50	12	5	21	8	14	1	7	67	1	13	5	8	6	7	3	1	8	2	2	1	6	4
ACADS	17	12	16	21	41	47	4	18	15	2	1	1	2	1	3	1	1	1	1	9	22	15	17	23	25	13	38	15	5	17	7	5	1	1	12	1	6	4	4	6	5	2	1	7	2	4	5	7	2
ACADSB	23	11	30	38	61	61	12	16	25	3	3	1	5	1	6	2	1	2	1	11	29	16	29	16	31	32	41	10	4	17	11	4	1	2	8	4	7	4	4	4	3	3	1	5	6	2	2	4	1
ACADVL	32	20	61	116	118	134	29	41	45	17	67	118	23	52	20	14	13	105	65	38	134	83	89	61	53	38	115	92	23	259	64	59	1	15	43	2	49	73	41	82	22	59	3	43	22	5	3	9	8
ACAN	13	18	17	43	48	40	15	20	17	1	1	1	1	1	1	3	1	2	1	10	12	15	14	22	28	20	26	8	1	3	3	2	1	3	3	2	7	4	1	4	2	1	1	2	4	2	1	8	1
ACAP2	17	15	21	42	58	62	9	17	19	4	1	5	8	1	7	4	2	3	4	10	16	16	18	15	32	18	28	24	4	22	11	5	1	2	12	2	8	2	4	6	11	4	1	8	2	5	3	6	2
ACAP3	10	4	20	29	29	39	15	12	26	1	3	2	3	3	1	1	1	1	3	11	26	13	25	24	35	27	36	4	3	26	11	4	1	3	12	1	9	3	5	4	5	8	4	7	1	2	2	8	2
ACAT1	26	21	44	57	84	101	19	27	26	7	5	2	6	1	9	1	2	1	3	14	26	23	18	24	32	31	25	9	8	27	8	6	1	5	12	3	12	6	10	2	5	1	3	7	1	1	1	2	2
ACAT2	15	13	9	44	31	41	11	10	15	1	6	7	4	3	4	6	2	3	2	11	32	26	22	21	31	23	27	12	6	22	10	9	1	5	12	6	4	2	7	5	1	2	6	1	3	4	2	4	2
ACBD3	32	17	36	41	101	149	11	33	25	2	13	39	7	11	4	1	4	22	12	13	50	28	21	28	36	30	56	41	13	71	20	18	1	10	22	1	12	22	19	24	2	20	4	13	8	6	3	12	2
ACBD4	13	10	19	29	51	27	12	11	17	1	3	6	5	1	1	1	1	3	2	7	14	13	7	18	20	26	26	6	3	4	5	5	1	3	10	2	5	2	3	3	1	1	1	1	3	1	2	4	1
ACBD5	18	23	23	52	42	61	11	16	29	2	3	6	6	2	3	3	1	9	2	15	33	26	32	23	27	17	43	20	6	57	23	16	1	6	13	1	10	9	8	12	7	8	5	11	4	1	4	4	1
ACBD6	11	12	23	38	28	44	6	14	18	2	4	6	3	1	7	1	2	8	2	15	20	13	16	21	25	20	25	6	5	17	8	6	1	1	14	2	4	2	8	6	6	2	2	2	6	1	5	6	1
ACBD7	7	8	12	29	29	33	12	12	14	1	1	2	2	1	9	3	1	2	3	13	17	11	18	21	20	16	25	6	5	9	1	2	1	2	9	1	5	1	1	6	2	1	2	5	2	3	2	10	1
ACCS	13	16	14	38	42	41	11	7	29	2	1	4	2	1	3	1	2	2	1	6	20	15	14	15	23	24	24	4	1	7	6	8	1	3	7	1	9	2	3	3	2	1	1	5	2	2	5	4	1
ACCSL	9	9	6	25	27	23	6	8	11	1	1	2	3	1	4	1	1	1	1	6	15	8	7	18	18	13	18	4	1	8	3	1	1	1	5	2	7	1	3	2	2	1	1	2	1	1	2	5	3
ACD	15	6	8	56	50	57	10	20	16	1	4	5	6	3	6	1	2	3	1	13	15	15	20	24	31	15	24	5	7	14	2	2	1	2	9	1	4	1	3	2	3	4	3	5	3	3	1	4	1
ACE	21	14	20	34	47	50	14	19	14	2	2	2	1	1	5	1	1	6	1	10	28	27	24	21	36	32	37	5	5	12	2	5	1	3	9	1	6	3	6	4	3	1	1	5	4	1	5	7	3
ACE2	7	6	7	32	24	34	12	10	12	3	1	2	7	1	1	2	1	3	1	5	12	8	24	14	31	33	22	11	5	6	6	2	1	7	7	1	4	1	4	1	2	1	1	4	2	1	4	3	1
ACER1	9	8	12	31	24	38	4	10	15	1	1	2	2	1	5	1	1	1	1	9	17	12	13	17	32	16	19	5	6	7	6	2	1	2	9	5	6	3	3	1	1	2	1	1	5	1	2	2	1
ACER2	17	10	15	29	66	58	12	9	27	5	3	5	1	4	5	1	1	12	3	12	26	22	16	25	17	31	25	8	7	9	10	8	1	5	3	3	8	1	3	7	3	1	2	4	2	2	4	5	1
ACER3	24	15	25	38	43	57	10	17	32	1	4	3	4	4	3	3	4	6	1	10	22	13	22	15	21	23	24	6	10	7	3	7	1	3	8	2	4	1	4	3	1	2	2	2	1	1	2	4	1
ACHE	14	14	15	36	65	60	11	15	25	2	4	23	1	8	7	2	1	1	2	18	42	23	19	18	34	30	22	71	5	125	28	14	1	4	19	2	5	17	7	35	4	16	2	11	5	2	4	5	1
ACIN1	31	21	27	54	69	74	13	27	34	3	6	14	5	3	8	2	2	7	3	9	16	19	19	23	32	24	36	18	10	58	12	6	1	5	13	1	15	15	6	18	7	7	1	14	5	3	3	6	3
ACKR1	8	5	10	21	19	29	17	8	9	3	1	2	1	1	1	1	2	1	1	5	14	7	10	9	30	10	16	5	4	3	6	2	1	3	5	1	8	3	2	1	1	1	1	3	1	1	1	5	1
ACKR2	6	12	10	31	34	32	10	12	27	2	1	1	1	1	4	1	1	1	3	7	13	9	18	24	42	19	21	4	6	1	5	2	1	2	4	4	3	1	5	1	2	3	4	2	1	4	5	13	2
ACKR3	14	12	13	33	33	41	14	12	36	2	1	3	2	1	9	1	1	1	1	15	15	5	8	13	23	19	25	5	9	8	4	1	1	4	6	1	3	2	10	3	3	2	1	3	3	1	6	8	1
ACKR4	8	18	19	31	23	44	13	12	20	1	1	1	1	1	3	1	1	1	1	13	16	15	19	20	36	28	21	8	5	5	4	4	1	3	10	4	2	1	3	2	5	1	2	2	3	2	2	8	3
ACLY	13	11	16	45	46	53	31	16	23	4	5	8	4	2	4	1	3	8	5	11	31	20	21	25	39	30	45	3	7	17	4	4	1	2	8	2	5	11	10	8	3	1	1	2	5	3	1	7	1
ACMSD	12	11	14	24	31	43	3	17	12	2	5	2	4	1	4	1	1	1	1	6	9	11	14	15	19	21	18	6	2	5	4	1	1	3	12	2	1	1	1	1	1	4	6	1	1	1	6	8	2
ACO1	16	13	17	52	43	65	26	23	20	3	4	6	3	6	3	3	1	14	8	14	23	23	22	23	31	20	25	6	7	11	4	3	1	4	6	1	8	3	9	3	1	1	2	6	4	2	4	6	4
ACO2	22	7	15	51	39	59	16	22	29	2	3	6	7	1	7	2	2	5	1	19	22	22	26	20	36	25	43	11	10	11	11	7	1	5	13	2	6	8	10	11	1	3	1	6	5	2	3	11	1
ACOD1	14	14	14	30	28	36	9	9	29	1	1	2	8	1	3	2	1	3	2	16	23	23	21	26	35	31	24	8	3	6	4	7	1	5	10	2	3	1	3	4	4	1	1	6	3	2	4	9	1
ACOT1	22	15	20	40	42	57	12	11	31	2	4	1	4	2	4	1	3	2	2	24	15	25	28	29	45	29	27	9	7	16	4	8	1	5	24	4	6	6	5	9	1	4	2	5	4	1	6	8	1
ACOT11	169	69	148	203	353	411	52	167	132	6	6	11	9	2	7	1	3	12	3	21	68	48	44	53	37	36	82	22	7	47	17	8	1	7	22	1	6	17	6	17	3	4	3	13	3	1	3	7	3
ACOT12	9	7	11	29	33	36	7	8	20	1	1	1	2	1	5	2	1	1	1	11	14	9	11	14	29	19	18	4	5	6	1	3	1	2	23	1	7	4	2	5	1	1	4	4	3	2	1	3	2
ACOT13	14	13	24	51	32	51	7	20	18	1	3	4	2	1	7	1	2	1	2	12	24	12	22	21	42	21	23	7	7	16	12	7	1	1	14	2	2	1	5	3	3	6	1	4	3	3	1	6	1
ACOT2	25	18	23	41	47	70	12	20	27	3	1	4	4	2	5	1	1	1	2	19	30	18	20	23	45	26	37	10	14	15	8	5	1	4	12	1	7	4	10	5	2	3	1	2	8	4	4	11	6
ACOT4	42	27	49	81	106	130	21	49	38	1	3	3	2	3	6	1	2	2	1	15	23	25	27	31	36	27	41	15	7	14	12	5	1	8	7	3	5	5	9	5	5	4	5	8	1	2	3	6	2
ACOT6	6	6	15	30	28	36	7	13	18	1	4	1	1	1	1	1	1	1	1	6	18	12	15	12	20	20	21	4	5	6	5	2	1	3	14	2	1	1	3	1	1	2	1	2	1	2	5	4	2
ACOT7	13	10	22	38	40	41	11	21	18	3	5	1	4	1	6	1	1	3	1	13	30	19	25	19	33	24	31	8	5	17	3	8	1	2	5	4	5	4	2	6	3	1	1	5	4	1	6	14	4
ACOT8	24	10	19	64	40	50	8	13	19	1	5	8	4	1	4	1	2	9	2	9	27	19	23	21	27	33	35	11	3	26	13	9	1	3	16	1	9	7	6	9	1	4	3	8	1	1	3	10	8
ACOT9	9	8	24	41	44	57	11	18	25	3	3	4	5	4	6	4	4	5	1	12	25	30	32	29	15	32	39	9	7	18	14	8	1	11	20	1	8	1	7	13	9	11	2	4	3	1	5	4	2
ACOX1	25	11	32	39	86	84	14	20	26	1	10	18	4	6	5	2	1	18	6	8	36	20	23	23	22	11	38	13	4	21	12	12	1	2	9	3	9	12	5	9	2	6	1	6	2	3	2	6	2
ACOX2	11	9	13	49	32	35	3	12	17	3	2	4	5	1	1	2	1	1	2	9	12	10	16	15	34	17	23	7	4	12	6	2	1	1	6	1	6	2	6	3	3	1	4	3	1	1	2	9	2
ACOX3	9	10	11	32	21	35	9	15	14	3	2	2	1	1	1	1	1	1	2	7	20	14	15	13	36	25	32	8	5	9	3	7	1	2	14	1	5	3	3	3	2	4	3	5	3	3	2	6	1
ACOXL	6	6	8	21	16	19	5	4	21	1	1	1	2	1	3	4	1	3	1	8	8	10	8	9	12	12	17	4	3	4	1	1	1	1	5	3	3	2	4	3	2	1	6	1	1	3	4	2	2
ACP1	24	12	21	69	61	64	9	17	27	1	7	5	6	4	3	1	1	8	6	18	52	23	34	35	37	27	55	14	8	31	21	13	1	5	16	1	7	8	3	12	4	4	1	8	4	6	7	20	1
ACP2	12	12	24	46	43	50	11	23	25	1	4	6	6	1	4	1	1	3	2	10	22	27	32	16	20	30	38	27	3	11	4	9	1	2	13	2	3	3	11	4	5	4	6	9	7	1	2	6	3
ACP3	13	11	15	40	31	38	10	12	16	2	1	1	2	1	6	2	1	1	2	6	27	25	13	27	25	36	34	12	3	10	5	1	1	4	11	1	10	2	6	7	1	1	2	3	3	3	2	5	1
ACP4	8	6	16	32	28	44	8	14	18	1	2	1	1	1	3	1	1	1	1	8	15	14	11	19	30	16	20	3	4	11	5	6	1	2	47	1	7	2	4	3	1	2	1	2	2	2	2	5	1
ACP5	6	4	12	28	31	29	5	7	18	1	4	4	3	1	1	3	1	7	3	4	19	18	15	16	19	21	20	6	3	19	9	7	1	2	14	1	1	1	6	4	11	5	1	2	2	2	2	4	2
ACP6	28	12	33	57	54	62	13	13	30	7	10	19	7	2	2	1	1	31	6	16	21	29	24	23	28	21	36	25	9	50	7	10	1	5	21	1	13	28	9	10	3	6	1	17	6	3	2	16	1
ACP7	2	7	11	25	22	23	13	3	16	2	1	2	2	1	5	1	1	1	1	7	12	15	12	15	23	13	22	8	2	6	2	2	1	1	5	1	7	3	5	4	4	3	1	3	1	2	2	1	1
ACR	8	6	8	29	33	34	6	8	23	6	1	2	3	1	3	1	1	2	1	9	14	11	21	22	27	51	22	9	3	7	8	3	1	6	8	4	8	3	4	4	1	3	1	5	3	1	2	10	4
ACRBP	4	2	13	22	22	27	5	5	18	1	1	1	3	1	5	1	1	1	1	7	19	15	16	9	28	15	18	9	3	8	3	2	1	1	6	1	8	3	1	3	3	1	2	5	1	1	3	7	2
ACRV1	14	19	11	36	50	55	9	18	18	1	5	1	2	1	3	1	2	1	1	8	20	22	12	20	36	23	32	7	7	8	5	1	1	4	13	1	4	2	5	4	4	4	3	2	2	2	1	8	1
ACSBG1	14	15	15	41	24	25	9	7	18	1	1	1	1	1	3	2	2	2	1	13	12	17	7	10	38	16	13	8	3	6	6	2	1	1	12	1	4	1	4	2	1	1	3	2	3	1	1	4	1
ACSBG2	15	13	24	43	55	67	12	19	16	1	4	1	1	1	1	2	1	2	1	11	13	8	17	18	28	18	25	7	7	10	4	5	1	7	8	1	6	3	3	3	1	1	1	2	6	1	3	6	1
ACSF2	393	151	284	378	578	1011	134	337	273	6	12	25	15	8	13	8	5	28	9	63	246	227	191	157	91	82	274	55	15	102	34	29	1	14	28	1	24	28	28	31	9	20	5	37	10	5	5	15	3
ACSF3	13	22	24	43	61	50	11	23	27	3	2	3	6	2	8	2	1	7	3	9	70	37	32	28	39	22	45	14	5	20	7	6	1	6	21	1	11	6	8	4	3	1	5	10	2	2	2	2	1
ACSL1	23	24	27	59	57	69	34	27	26	17	7	8	39	3	26	28	28	5	1	32	31	27	21	20	55	45	36	16	15	26	12	8	1	12	12	1	20	8	13	5	10	3	5	4	2	3	7	13	1
ACSL3	19	8	12	39	36	45	8	17	18	3	11	8	5	3	2	7	1	8	3	7	29	16	22	19	17	19	27	9	3	14	5	5	1	6	11	1	7	3	6	9	5	3	2	3	4	1	6	6	2
ACSL4	26	15	37	79	54	90	21	29	35	4	3	14	10	2	5	3	2	12	6	31	34	35	37	25	31	26	42	9	15	20	10	5	1	8	10	1	18	8	16	10	19	7	5	7	7	4	8	7	2
ACSL5	38	7	41	35	97	101	4	30	9	3	11	25	1	7	3	1	1	30	9	6	72	58	34	37	13	20	59	28	4	57	10	17	1	5	20	1	5	22	8	26	1	6	2	17	1	1	2	8	1
ACSL6	15	9	16	33	27	31	7	13	15	1	1	1	3	1	3	1	1	2	1	5	12	9	12	17	17	14	11	10	3	9	3	1	1	3	5	3	2	3	1	2	1	1	1	1	3	1	2	4	1
ACSM1	5	8	10	27	21	23	9	8	8	1	1	2	1	1	4	1	2	1	1	4	24	20	12	23	30	18	21	5	2	10	5	3	1	5	3	1	4	3	3	2	1	1	1	3	4	1	4	3	3
ACSM2A	9	12	20	36	48	41	6	13	20	2	1	1	4	1	7	1	1	1	1	13	15	15	18	20	28	24	37	4	4	10	3	2	1	4	10	1	6	1	5	1	1	3	1	3	1	1	2	7	1
ACSM2B	12	16	7	19	30	34	8	8	16	1	1	1	1	1	1	1	1	1	1	14	11	9	13	18	25	15	18	8	5	4	2	1	1	4	6	2	8	1	1	3	1	1	2	2	1	2	1	6	3
ACSM3	31	14	31	47	64	75	16	24	26	1	2	7	2	1	3	3	1	3	2	9	18	23	19	19	31	25	31	12	4	7	4	4	1	4	7	1	6	3	1	3	1	1	1	3	4	3	4	3	1
ACSM4	14	7	20	45	44	48	11	11	22	1	2	2	2	1	6	1	1	5	2	6	7	17	13	19	40	27	28	11	4	11	3	1	1	1	11	1	7	3	4	1	3	1	4	8	3	2	2	8	4
ACSM5	24	15	35	47	79	56	14	26	30	4	3	1	5	1	5	1	2	4	1	9	15	22	27	24	43	26	23	10	6	3	12	3	1	4	7	1	6	2	2	2	1	2	4	3	1	1	1	6	2
ACSM6	6	11	6	23	20	24	7	15	12	1	2	5	1	1	2	1	1	1	2	8	12	10	13	19	16	16	8	3	5	6	5	7	1	1	2	3	5	1	3	2	1	1	1	2	2	2	1	5	3
ACSS1	25	13	27	41	56	35	25	14	25	5	16	13	15	2	6	3	4	8	1	8	37	24	20	29	41	28	41	37	8	59	16	6	1	4	28	2	13	21	10	11	4	6	2	4	2	2	6	4	1
ACSS2	25	3	16	23	39	50	4	25	20	2	8	7	4	4	3	1	1	8	6	8	49	21	16	20	24	19	57	36	4	55	18	6	1	2	11	3	5	6	1	4	3	3	3	1	3	4	2	6	3
ACSS3	14	8	21	48	42	53	13	20	31	1	2	3	5	1	7	2	4	3	4	24	23	21	20	15	38	33	27	6	9	4	8	4	1	7	6	2	8	2	8	2	4	2	3	1	7	1	1	8	2
ACTA1	14	12	12	32	27	46	13	9	21	1	1	3	6	1	7	1	1	1	1	12	17	13	10	10	34	21	43	9	4	9	8	2	1	1	7	1	6	3	1	2	2	5	6	5	2	1	1	6	1
ACTA2	18	25	49	69	138	115	14	37	34	3	4	5	5	1	7	2	3	22	8	19	35	17	32	23	35	25	36	8	7	13	10	15	1	17	9	3	15	9	16	1	13	4	2	12	8	1	2	1	1
ACTBL2	14	5	15	42	44	43	10	16	25	1	2	1	3	2	4	1	1	3	1	9	14	18	17	19	23	32	33	11	2	11	6	3	1	4	9	1	4	1	5	4	1	1	2	3	3	1	4	6	1
ACTC1	68	22	71	217	262	368	14	74	54	1	3	5	1	3	3	1	1	3	3	10	25	19	23	24	25	24	24	7	3	16	1	6	1	7	13	1	8	2	3	5	2	2	3	9	3	2	1	5	3
ACTG2	9	18	16	45	50	36	9	13	25	2	2	2	1	1	5	2	1	1	2	6	21	22	24	25	27	24	22	8	7	10	8	13	1	2	11	3	7	1	5	4	4	2	1	4	4	4	1	6	2
ACTL10	13	4	18	39	32	48	16	16	25	1	1	1	3	1	5	1	1	2	2	12	12	15	17	23	21	7	26	10	3	10	7	4	1	4	10	2	3	5	6	2	2	1	4	3	2	1	3	6	3
ACTL6A	19	8	27	55	59	79	12	21	33	3	9	16	4	1	3	1	3	15	3	16	43	28	36	31	53	24	43	17	5	42	15	12	1	7	6	2	14	8	8	7	4	3	1	7	2	3	7	14	3
ACTL6B	6	10	12	19	31	23	5	5	7	1	1	1	2	1	4	1	1	2	1	5	13	14	11	14	17	11	13	7	4	5	2	1	1	2	5	2	4	1	1	1	1	1	3	1	3	1	4	6	3
ACTL7A	8	9	9	16	27	27	4	9	16	1	2	1	2	1	1	2	1	1	1	5	15	14	10	13	21	15	11	3	6	7	1	2	1	1	9	2	1	2	2	1	3	1	5	4	1	1	1	5	1
ACTL7B	6	4	10	26	35	32	6	9	16	1	1	2	3	1	2	2	1	3	1	10	12	9	10	15	27	20	17	3	5	7	2	2	1	1	4	2	4	1	3	1	3	1	4	2	2	1	1	7	2
ACTL8	14	19	22	48	41	42	6	14	20	3	2	5	2	1	5	2	1	1	2	8	23	18	19	26	37	22	33	8	9	26	10	4	1	3	18	1	4	1	4	3	2	3	3	8	2	1	2	5	2
ACTL9	13	12	26	37	53	70	15	20	28	2	4	2	4	1	5	4	1	5	3	11	14	11	19	22	22	21	32	17	9	19	11	2	1	3	11	1	9	1	7	2	3	3	1	9	2	1	1	6	3
ACTN1	26	11	38	54	113	142	9	33	36	3	22	15	3	11	5	1	2	29	20	9	38	32	36	29	15	19	36	21	8	70	10	31	1	9	23	2	4	21	20	17	15	20	1	16	7	5	18	20	4
ACTN2	11	12	19	57	32	47	12	13	13	2	1	1	3	1	2	1	1	5	2	10	24	18	20	24	37	24	25	8	5	16	7	8	1	1	9	3	7	2	5	9	1	3	4	3	3	2	3	5	3
ACTN3	12	14	11	27	39	32	10	13	23	2	1	1	3	1	1	1	1	1	1	9	12	13	11	14	25	19	14	9	9	7	4	4	1	4	14	1	2	3	5	2	1	2	2	7	1	3	2	5	3
ACTN4	51	17	67	68	180	215	14	41	26	17	43	52	14	23	14	8	8	70	22	18	195	114	105	122	32	32	142	90	14	176	53	75	1	11	35	1	26	34	25	79	21	33	8	28	10	4	14	24	3
ACTR10	92	40	123	135	252	382	34	80	96	7	15	24	8	10	7	10	1	19	10	36	85	67	72	55	39	40	86	64	19	70	31	38	1	11	33	1	20	22	19	20	13	17	8	21	8	5	3	11	7
ACTR1A	15	11	20	64	35	64	11	23	29	2	4	4	7	1	4	1	2	7	3	13	43	30	29	37	36	19	32	13	5	23	10	10	1	7	51	1	3	4	6	6	6	6	2	5	6	3	2	2	2
ACTR1B	10	6	9	27	26	36	7	6	6	1	2	8	4	3	3	1	3	5	1	6	22	16	18	14	26	26	28	17	6	20	8	3	1	1	14	1	4	7	7	6	3	2	3	7	2	4	6	4	4
ACTR2	46	27	89	111	174	277	23	63	48	18	33	46	28	17	19	10	5	59	29	35	144	93	78	61	38	33	110	79	16	171	26	54	1	21	42	3	28	46	19	52	16	27	2	30	9	9	18	38	2
ACTR3	54	23	64	126	201	311	14	69	50	27	33	63	19	14	17	12	9	73	36	46	191	116	115	92	36	38	151	54	25	156	37	52	1	15	32	3	35	23	33	67	21	47	9	28	15	1	10	22	5
ACTR3B	16	14	27	48	60	54	11	16	25	1	5	13	4	4	4	3	1	10	7	11	28	26	36	25	33	21	39	29	6	52	21	10	1	2	61	3	9	14	4	12	3	5	2	3	1	2	2	8	1
ACTR5	8	7	24	32	41	55	6	16	17	1	5	4	4	1	4	4	1	2	1	9	19	22	30	19	30	18	23	16	4	12	5	8	1	2	12	1	4	7	6	8	1	2	2	8	2	1	6	3	1
ACTR6	21	16	16	40	37	32	7	10	24	1	2	7	6	1	5	3	3	4	2	7	23	23	23	33	25	26	30	12	3	17	11	5	1	8	8	1	127	3	6	4	6	1	5	4	3	1	2	7	1
ACTR8	10	14	16	35	30	31	8	9	24	2	3	8	2	1	1	1	1	8	3	10	15	12	20	15	20	23	15	15	7	10	9	4	1	4	22	1	7	4	3	1	1	3	1	7	2	2	3	4	2
ACTRT1	16	14	14	40	39	39	12	19	28	1	2	1	2	3	1	2	1	1	1	19	18	15	23	18	33	23	25	9	5	5	4	3	1	4	18	1	6	1	2	3	3	3	2	2	2	1	1	11	2
ACTRT2	20	25	26	55	51	73	15	22	27	1	3	5	3	1	6	2	3	2	1	6	12	15	16	23	29	23	38	4	5	14	5	5	1	2	6	1	3	3	6	3	2	3	1	6	3	3	2	8	5
ACTRT3	11	7	25	35	34	26	7	12	22	1	1	2	1	1	6	1	1	1	1	9	7	9	16	15	27	16	26	11	1	15	5	5	1	1	17	1	5	1	7	2	1	3	2	8	4	1	1	6	4
ACVR1	21	16	28	80	72	86	9	15	31	8	9	17	8	4	4	2	2	22	13	20	57	29	36	41	29	23	54	12	12	34	9	15	1	15	12	1	17	9	18	21	15	11	2	7	8	4	1	8	5
ACVR1B	15	6	35	35	44	63	5	18	24	1	10	8	4	3	5	2	1	10	6	16	46	17	27	27	28	22	46	28	6	32	9	6	1	4	13	1	7	3	7	8	2	3	3	8	3	4	5	10	2
ACVR1C	14	12	20	34	45	57	16	11	18	1	3	3	1	3	5	1	2	5	1	9	20	13	17	19	24	17	28	13	4	9	8	4	1	3	14	1	4	2	4	3	3	2	3	5	1	3	2	3	1
ACVR2A	19	16	21	54	53	52	9	16	27	4	7	13	1	1	2	1	2	6	4	20	35	24	27	31	46	22	52	21	9	24	7	7	1	4	12	2	7	9	6	7	6	7	2	17	2	1	3	5	4
ACVR2B	8	5	12	34	29	31	13	16	21	1	1	5	1	1	1	1	1	2	1	8	7	16	13	22	26	23	23	12	5	8	5	3	1	1	10	1	6	3	7	3	1	4	1	7	1	1	4	5	1
ACVRL1	11	5	13	28	29	38	6	12	19	2	1	1	4	1	2	1	2	1	2	7	11	11	16	14	18	12	15	10	3	15	6	7	1	1	5	2	3	6	5	2	4	3	1	4	3	2	2	1	2
ACY1	13	8	28	40	53	60	13	17	15	4	2	3	3	1	3	1	3	8	1	9	36	25	20	29	29	23	29	32	6	31	24	11	1	1	17	2	12	5	5	11	3	8	4	10	3	3	2	6	3
ACY3	17	9	18	35	48	40	13	21	21	3	4	4	1	1	5	4	2	5	1	6	21	15	21	22	30	18	27	7	6	14	10	6	1	6	13	1	3	1	2	5	1	2	2	4	1	1	1	9	1
ACYP1	11	10	22	37	52	50	4	18	19	1	3	3	1	3	2	1	1	2	2	7	27	17	24	21	25	20	33	5	1	6	5	4	1	6	5	1	7	3	2	3	1	4	2	4	1	3	9	7	3
ACYP2	20	10	34	56	91	83	16	19	34	1	4	5	4	1	3	1	4	3	3	19	26	37	30	18	48	26	43	15	6	18	7	5	1	3	17	2	8	6	5	6	3	5	7	5	2	1	3	6	1
ADA	8	11	15	35	34	46	8	9	21	2	4	7	3	2	5	3	1	3	8	6	19	23	31	20	27	17	36	5	5	12	6	6	1	2	6	2	3	1	2	5	3	2	1	3	3	3	1	7	1
ADA2	9	17	22	36	29	40	7	15	25	1	1	1	6	1	8	3	3	1	1	10	10	12	13	10	25	23	22	7	5	9	5	2	1	1	3	1	6	1	6	4	2	1	1	4	1	2	2	4	3
ADAD1	13	18	15	44	28	45	15	18	20	1	1	3	4	1	5	1	1	4	1	11	20	10	21	25	33	14	28	10	9	8	10	5	1	3	7	1	3	1	5	2	1	1	1	2	6	1	4	2	1
ADAD2	9	6	12	29	30	30	11	6	16	1	1	2	1	1	3	3	1	2	1	11	12	10	14	13	21	21	20	12	6	15	4	2	1	1	10	1	4	1	5	1	1	1	2	3	1	1	2	5	2
ADAL	6	7	9	28	20	35	5	8	18	1	1	1	5	2	4	1	1	1	1	5	10	10	14	11	13	13	19	5	1	11	3	2	1	3	13	1	3	1	6	2	1	1	1	5	1	1	3	5	1
ADAM10	32	28	47	103	123	138	12	36	51	14	9	10	10	2	8	4	5	15	7	35	97	61	51	53	48	32	67	18	10	68	22	28	1	5	14	1	18	13	14	19	12	15	3	21	11	5	3	6	1
ADAM11	11	15	17	52	41	57	6	11	22	1	4	1	1	1	7	1	1	2	1	11	29	17	16	18	40	20	31	10	4	10	5	1	1	1	9	2	6	1	5	4	2	4	1	4	3	2	3	5	2
ADAM12	9	14	8	25	40	42	8	20	21	1	2	2	3	1	6	2	1	4	1	9	14	16	12	12	25	14	27	6	5	7	3	2	1	7	7	5	5	1	6	3	1	4	1	8	1	2	2	3	1
ADAM15	25342	12057	25533	39701	48837	66401	8198	25870	20984	1144	1897	2590	1813	970	922	806	719	2208	1224	6988	24726	28314	22995	24375	9443	7521	34897	14518	3971	15703	10746	6243	1	3104	4831	213	6068	4043	4045	5251	2381	2314	2193	5988	2516	124	168	313	128
ADAM17	16	9	16	38	30	54	10	13	20	1	5	3	5	1	4	4	1	5	3	6	12	11	7	20	22	13	27	6	7	14	2	6	1	1	9	1	10	2	6	4	3	5	3	7	3	3	5	9	3
ADAM18	15	12	18	37	30	40	7	14	25	5	1	2	1	1	3	1	2	1	1	1	13	19	9	17	25	20	15	8	4	7	2	2	1	1	13	2	1	2	3	1	2	1	1	1	3	2	2	2	1
ADAM19	19	15	26	36	53	72	11	18	28	1	5	10	5	2	13	2	1	13	7	7	15	13	15	22	19	26	26	7	7	14	5	7	1	3	3	1	8	6	7	19	7	9	4	3	2	3	2	5	1
ADAM2	9	5	10	28	27	31	9	7	14	1	1	2	1	1	3	1	1	5	1	4	22	11	14	14	25	35	24	8	3	5	6	5	1	3	7	1	5	2	3	3	1	1	1	4	1	2	4	4	1
ADAM20	18	8	19	43	31	56	8	21	24	1	1	4	1	1	6	1	1	1	1	4	17	13	15	16	22	20	24	4	1	7	5	4	1	6	4	1	3	4	5	5	1	1	2	8	1	1	1	1	1
ADAM21	3	11	10	28	18	26	4	10	21	1	1	1	1	1	3	1	1	1	1	3	14	11	12	14	22	16	17	5	1	4	5	2	1	3	4	1	3	2	1	2	2	1	1	3	1	2	2	3	1
ADAM22	8	10	20	34	42	52	9	12	23	1	1	1	1	1	2	1	1	5	1	12	9	18	19	25	35	23	30	9	7	12	5	3	1	3	11	1	4	3	2	2	1	1	4	5	5	2	2	3	5
ADAM23	16	23	16	50	43	46	11	13	32	1	1	6	5	2	6	3	3	6	1	14	19	15	14	20	33	29	18	5	11	4	12	7	1	2	5	2	11	3	9	1	6	3	2	3	4	3	4	11	1
ADAM28	30	14	30	35	57	61	9	25	16	2	9	12	5	2	4	3	4	12	3	14	73	35	31	42	31	26	76	5	3	20	12	4	1	5	9	1	8	4	5	5	1	13	6	17	3	1	5	6	1
ADAM29	10	12	6	25	28	24	10	17	17	3	1	1	1	1	5	1	1	1	1	12	17	14	13	18	22	15	33	4	2	4	4	2	1	2	9	2	2	1	3	2	1	1	2	2	1	1	3	7	1
ADAM30	15	12	14	31	52	43	8	10	23	2	2	2	3	2	5	3	1	2	1	7	4	10	21	17	23	19	19	6	7	9	3	4	1	4	3	1	9	1	4	5	1	1	3	3	4	2	2	5	1
ADAM32	11	10	7	27	37	33	15	7	18	1	1	3	3	2	4	1	1	1	2	8	14	23	20	18	35	24	34	5	6	8	5	4	1	5	9	1	5	3	8	3	1	1	3	4	3	2	2	3	1
ADAM33	9	13	16	31	30	33	13	11	24	2	1	1	4	1	2	1	4	1	2	8	29	23	15	16	43	32	34	11	8	8	6	7	1	3	4	3	13	1	7	3	1	1	2	3	1	1	3	3	3
ADAM7	12	7	14	34	27	40	10	12	16	2	1	2	4	1	3	4	1	2	1	10	15	13	19	18	32	30	30	5	7	5	4	1	1	1	2	3	8	2	2	2	2	1	2	4	2	1	1	1	1
ADAM8	19	10	30	45	64	70	13	30	21	2	14	17	2	17	7	1	2	12	6	9	47	26	28	23	32	22	56	11	3	31	12	30	1	5	15	1	6	10	3	37	10	28	2	15	5	2	1	5	1
ADAM9	210	29	486	102	1128	1362	9	260	39	14	35	69	6	24	7	3	2	47	32	31	133	82	73	81	33	30	82	54	14	139	42	39	1	8	19	1	28	31	21	28	9	28	3	31	5	3	1	13	1
ADAMDEC1	4	10	8	24	21	25	7	12	15	2	1	2	1	1	3	1	2	1	1	7	11	12	13	19	25	23	22	7	1	8	5	8	1	1	8	2	3	1	2	2	1	2	1	2	1	1	1	10	2
ADAMTS1	10	9	13	34	27	34	14	10	19	10	1	4	16	1	18	13	6	1	1	20	12	13	11	17	30	17	27	8	26	10	6	1	1	12	8	3	27	1	11	3	4	2	2	5	2	1	5	8	1
ADAMTS10	22	8	29	44	38	47	6	15	19	6	2	3	4	1	7	1	2	2	1	13	19	17	19	12	28	26	38	7	5	13	9	4	1	4	16	1	5	1	4	3	3	5	1	5	1	1	6	7	2
ADAMTS12	22	20	28	55	53	68	17	14	24	2	1	1	3	1	2	1	1	2	1	12	20	11	19	12	23	13	31	4	7	12	2	3	1	4	24	1	2	1	3	4	3	2	1	1	1	1	1	3	1
ADAMTS13	42	21	41	76	80	101	22	41	53	2	1	2	3	1	2	1	1	1	5	6	22	19	30	31	37	23	40	8	7	9	7	5	1	4	9	5	3	3	2	4	1	3	2	8	1	1	3	4	2
ADAMTS14	20	10	12	33	35	48	9	8	16	4	1	4	1	1	1	1	2	3	1	9	19	14	19	25	29	26	31	3	2	8	4	5	1	1	6	2	4	2	2	4	3	1	1	3	4	3	3	10	2
ADAMTS15	20	26	20	51	51	80	9	15	35	2	1	2	2	1	5	1	2	1	1	12	14	26	20	18	31	19	27	6	9	10	5	4	1	2	4	4	6	1	2	1	1	1	1	4	5	1	1	3	1
ADAMTS16	14	12	13	39	29	32	6	12	21	1	1	1	4	1	1	2	1	1	1	14	15	16	13	18	26	28	23	7	4	10	6	3	1	4	8	3	2	4	4	2	2	3	4	10	2	1	3	2	7
ADAMTS17	13	4	13	35	26	48	10	6	19	1	2	1	4	2	3	1	1	1	1	9	19	14	16	24	38	28	31	9	7	13	6	4	1	2	10	1	9	1	4	1	5	1	2	8	1	1	5	5	3
ADAMTS18	12	13	13	37	35	22	9	9	19	2	1	1	1	2	5	1	1	2	1	11	14	15	19	25	30	22	23	6	6	10	4	1	1	3	12	1	5	3	2	2	2	2	5	5	1	1	2	6	3
ADAMTS19	6	5	6	17	13	30	4	10	14	1	1	2	2	1	2	1	1	1	1	3	11	10	11	17	10	9	20	6	2	2	2	2	1	2	10	1	2	1	4	2	3	1	1	2	1	1	4	3	1
ADAMTS2	6	8	13	33	25	29	9	6	17	1	1	1	1	1	1	1	1	1	1	6	9	8	7	14	16	13	21	5	7	3	4	2	1	1	13	3	6	1	2	2	2	3	1	2	3	2	2	3	4
ADAMTS20	7	16	17	41	36	39	14	9	22	2	1	1	5	1	3	3	1	3	1	14	20	15	21	24	38	26	27	8	3	10	5	5	1	3	4	1	3	2	6	5	2	2	1	7	1	2	5	3	2
ADAMTS3	27	19	57	71	85	89	25	28	38	1	2	3	7	1	3	1	1	1	3	10	24	33	25	31	28	25	41	9	6	11	3	4	1	3	13	1	2	3	1	5	1	1	12	4	4	2	1	7	4
ADAMTS4	14	17	15	89	48	49	31	14	22	3	3	4	20	1	25	20	20	1	2	17	18	23	32	33	37	35	30	8	10	9	9	5	1	6	5	2	14	1	32	10	23	4	5	9	8	1	5	9	3
ADAMTS5	10	11	6	31	29	29	8	10	11	1	1	1	1	1	1	1	1	2	1	5	14	14	14	15	22	34	32	7	5	5	2	1	1	1	10	2	3	3	6	1	1	2	4	1	3	1	3	5	2
ADAMTS6	11	9	18	48	52	58	11	17	27	5	3	1	4	2	5	2	1	7	6	13	24	26	21	27	25	28	30	13	6	17	7	7	1	6	13	3	9	11	6	2	1	1	3	7	5	3	3	7	1
ADAMTS7	17	13	23	51	66	58	14	17	21	1	1	5	3	1	1	1	1	1	1	14	15	13	22	21	18	18	39	6	5	8	4	4	1	5	9	1	6	1	7	6	3	1	2	4	2	1	1	5	1
ADAMTS8	14	12	17	42	37	43	13	12	30	3	1	1	6	1	6	3	1	1	1	15	17	7	8	20	22	26	22	5	5	10	4	3	1	3	10	2	3	2	2	2	2	1	2	5	1	1	2	2	1
ADAMTS9	18	8	18	22	41	109	27	16	15	2	3	2	33	1	29	25	15	10	3	13	16	19	15	12	27	20	20	5	9	12	3	1	1	5	2	2	20	4	6	4	10	7	3	5	6	2	4	7	1
ADAMTSL1	13	7	16	32	42	35	5	13	20	1	2	1	4	1	4	1	1	4	2	9	19	14	16	22	35	15	22	7	14	5	5	5	1	5	11	1	13	3	5	6	3	1	1	3	8	2	2	12	3
ADAMTSL2	7	11	21	34	22	34	13	14	25	1	1	3	3	1	1	2	1	1	1	13	23	25	24	23	43	25	22	12	6	12	12	7	1	3	12	3	6	3	3	2	4	3	2	7	6	1	2	11	1
ADAMTSL3	16	9	18	40	46	49	9	15	20	1	2	2	2	1	3	1	2	1	1	4	16	21	12	14	20	22	21	5	2	6	2	2	1	4	12	1	3	2	4	1	2	1	2	5	1	1	1	6	1
ADAMTSL4	8	8	13	40	18	35	10	11	19	2	1	1	3	1	4	4	1	2	1	7	18	13	23	21	32	14	25	3	4	8	6	4	1	3	4	2	7	5	6	5	2	1	1	3	1	1	1	6	1
ADAMTSL5	10	8	16	37	45	40	8	12	15	2	1	3	2	1	3	2	1	1	1	13	23	17	14	21	20	23	40	8	1	12	3	5	1	1	8	1	2	1	1	1	5	2	1	3	4	4	3	3	1
ADAP1	39	14	55	51	183	183	21	38	25	1	29	27	11	21	6	1	5	12	12	11	89	80	71	72	40	23	109	76	11	148	67	34	1	5	37	1	17	39	16	38	5	16	4	25	3	3	5	4	1
ADAP2	17	13	21	38	43	43	3	11	21	3	1	2	8	1	8	2	1	2	1	9	15	14	9	17	19	16	22	4	5	8	6	2	1	3	12	1	3	4	4	1	3	5	4	4	10	2	1	5	1
ADAR	59	25	85	71	159	178	21	60	47	18	41	36	14	31	10	6	3	67	37	30	67	42	58	50	30	29	77	59	12	190	30	35	1	10	42	5	37	38	30	85	17	47	4	45	11	10	6	13	8
ADARB1	985	593	976	1580	1647	2309	282	1058	1122	15	28	24	26	9	13	9	12	24	11	98	310	278	309	282	143	120	493	112	36	139	86	49	1	43	39	12	56	39	35	48	22	20	26	52	25	5	5	6	5
ADARB2	16	13	11	29	38	53	8	9	22	1	1	1	3	1	7	1	1	1	1	15	24	10	16	18	29	39	29	8	6	7	5	3	1	1	7	2	6	2	6	1	2	1	2	5	3	2	3	5	1
ADAT1	20	9	12	48	59	56	20	19	19	4	1	2	3	2	2	3	2	6	1	12	25	17	24	19	33	19	34	14	6	21	10	8	1	3	13	3	10	2	6	5	5	1	3	5	3	1	1	7	1
ADAT2	5	10	15	32	21	35	6	7	26	5	3	3	2	1	3	1	1	1	1	10	12	21	17	14	33	23	26	4	6	15	6	3	1	1	8	3	6	4	9	2	1	1	7	5	1	2	3	7	2
ADAT3	24	11	15	56	59	63	11	27	24	2	3	2	7	2	7	3	1	10	3	12	32	21	27	26	26	20	33	21	8	25	7	8	1	5	8	1	4	5	7	9	3	3	4	7	3	3	2	6	1
ADCK1	10	5	14	36	27	37	14	11	18	5	2	2	5	1	2	1	1	3	1	4	11	7	6	9	21	16	20	5	1	10	6	2	1	2	4	2	4	2	2	1	1	4	2	4	3	2	1	6	1
ADCK2	10	11	16	38	41	41	10	12	26	2	3	1	4	1	6	2	1	5	5	9	25	14	26	18	43	19	27	10	3	29	12	9	1	5	13	1	7	5	4	2	6	1	1	2	1	4	4	12	1
ADCK5	13	4	9	28	24	26	11	8	11	1	7	7	1	1	2	1	1	1	1	7	14	6	7	7	15	16	25	5	4	19	10	7	1	2	11	1	3	4	4	2	1	5	4	1	2	9	6	12	5
ADCY1	13	10	9	37	29	43	12	15	21	1	1	2	3	1	1	1	1	1	1	10	14	15	15	15	34	21	19	7	6	7	5	4	1	1	7	3	22	3	9	2	1	1	1	1	5	1	3	6	2
ADCY10	9	5	11	29	43	31	11	14	17	1	1	1	3	1	1	1	1	4	1	7	9	6	19	10	22	13	12	10	6	8	4	2	1	1	7	2	3	2	35	3	2	1	1	4	1	2	1	6	4
ADCY2	13	6	8	36	39	16	9	9	17	1	1	4	1	1	4	5	4	1	2	11	20	12	13	17	21	16	23	7	4	6	5	1	1	1	12	1	4	2	2	3	5	1	3	7	1	3	1	3	2
ADCY3	7	14	17	46	32	36	10	16	20	5	3	1	8	2	8	1	3	1	1	15	21	26	12	17	16	15	28	7	9	9	3	6	1	4	10	1	16	6	11	2	9	4	1	2	5	2	1	5	3
ADCY4	20	10	15	49	56	51	14	11	24	1	3	5	1	2	4	3	2	1	1	13	18	18	19	13	39	25	28	9	4	12	6	4	1	3	17	4	7	1	1	6	1	2	1	6	4	1	1	1	1
ADCY5	6	13	18	43	47	42	10	18	21	1	2	1	1	3	4	1	1	3	1	10	21	11	18	11	22	16	19	4	5	8	5	1	1	3	7	5	10	4	3	3	1	1	2	3	3	1	1	6	2
ADCY6	42	28	61	97	157	186	24	54	32	12	16	20	16	5	8	3	1	15	14	17	49	36	47	45	40	29	46	36	15	52	67	14	1	7	31	3	15	13	13	20	12	12	25	20	18	4	3	9	1
ADCY7	20	15	14	34	57	48	12	18	24	2	1	3	2	1	5	5	5	3	5	18	18	23	25	27	35	26	28	10	6	25	11	7	1	5	11	5	11	7	9	11	2	3	4	6	2	2	8	13	3
ADCY8	10	13	18	29	31	42	4	14	21	2	2	2	1	1	5	1	1	1	1	13	15	17	23	37	51	31	37	9	6	10	2	3	1	1	7	1	4	2	5	4	1	1	4	2	3	2	3	6	3
ADCY9	10	13	20	44	29	44	8	19	15	3	2	3	6	4	8	1	1	2	2	8	7	11	15	7	21	21	28	7	4	14	1	3	1	3	9	2	4	1	6	6	2	1	1	6	3	1	3	2	3
ADCYAP1	8	14	19	48	39	50	17	11	18	2	1	1	2	1	4	1	1	1	1	9	15	12	17	17	30	19	27	3	5	9	5	3	1	2	12	1	2	5	2	4	2	1	5	2	1	3	1	7	1
ADCYAP1R1	12	16	21	41	27	39	4	13	18	1	1	2	2	1	4	1	1	1	1	11	18	12	9	22	29	16	25	3	4	8	1	7	1	4	6	1	3	3	1	4	1	2	3	1	2	3	3	7	1
ADD1	19	20	25	57	72	88	17	27	30	11	11	8	19	6	8	5	5	13	8	15	31	21	23	31	41	22	30	26	15	44	15	12	1	11	14	1	13	15	18	14	6	12	2	9	8	6	5	8	3
ADD2	7	6	13	40	34	37	9	7	14	1	1	1	1	1	1	1	1	1	2	8	14	20	12	20	36	21	21	5	2	10	2	5	1	1	14	2	4	1	1	4	3	1	1	4	2	3	3	1	2
ADD3	58	38	66	116	158	149	19	41	62	12	14	22	32	6	30	21	12	22	10	53	165	87	66	56	104	68	138	80	35	131	68	25	1	14	32	2	41	32	23	41	18	20	8	35	16	2	5	10	1
ADGB	12	12	18	30	35	33	9	5	22	1	1	1	2	1	3	1	1	1	1	14	13	17	13	16	35	25	22	10	3	12	8	2	1	4	9	1	8	4	4	3	2	1	2	9	2	1	1	2	3
ADGRA1	16	14	30	50	44	51	6	11	28	1	2	1	1	1	4	1	1	1	1	13	27	15	14	22	28	33	12	5	1	12	6	4	1	2	14	3	4	1	5	7	1	3	3	8	1	3	4	4	2
ADGRA2	15	7	12	21	19	45	6	13	22	2	1	3	3	1	3	1	1	2	1	14	14	14	11	16	26	19	23	5	4	6	2	3	1	5	6	2	14	3	4	2	3	2	1	6	1	1	3	1	1
ADGRA3	16	12	33	42	39	52	10	14	26	3	5	6	7	3	6	1	4	9	6	7	21	20	20	19	41	23	37	10	10	15	8	15	1	5	10	2	6	8	5	4	1	5	3	11	6	2	2	3	1
ADGRB1	5	8	9	23	19	24	6	6	12	1	1	1	5	1	1	1	1	4	1	6	8	11	8	3	22	11	18	4	2	3	2	4	1	2	3	2	5	1	7	4	1	3	1	3	1	1	4	2	2
ADGRB2	5	7	19	24	37	39	10	7	23	1	1	3	2	1	4	2	1	1	1	4	18	8	12	18	21	21	23	3	5	4	1	2	1	2	14	2	4	3	3	1	2	1	1	4	1	4	1	4	1
ADGRB3	9	19	16	50	25	46	11	6	19	3	2	2	17	1	3	4	2	3	1	21	11	13	17	23	30	24	22	8	4	9	6	2	1	2	7	3	14	1	4	3	1	1	3	2	6	2	3	4	1
ADGRD1	13	5	18	49	31	40	8	10	10	4	1	1	3	1	6	1	1	2	1	19	14	11	20	15	32	17	23	10	8	5	6	6	1	5	16	1	11	6	3	1	4	1	5	2	6	1	1	5	2
ADGRD2	33	24	41	62	83	121	17	39	45	1	2	2	2	1	5	1	1	2	2	20	36	28	23	37	38	24	47	12	9	11	8	2	1	6	12	4	9	1	5	6	1	3	2	5	4	2	2	7	2
ADGRE1	11	9	11	49	38	29	14	12	23	1	1	1	2	1	3	1	1	2	1	12	22	15	14	27	20	19	26	3	4	7	3	3	1	4	8	1	3	1	2	2	3	1	6	6	2	1	6	4	1
ADGRE2	20	18	28	62	60	47	13	23	26	7	4	2	5	2	7	1	5	1	3	15	23	17	22	34	26	23	30	3	6	10	5	2	1	4	7	1	7	3	9	2	7	4	3	7	3	2	8	9	3
ADGRE5	26	12	48	69	97	153	19	43	31	8	17	24	2	13	10	1	1	11	5	20	54	44	38	36	25	11	60	63	8	161	30	42	1	5	33	3	17	26	13	58	14	37	5	16	3	6	3	11	1
ADGRF1	35	12	32	47	65	85	6	37	18	4	15	24	3	5	3	1	1	27	9	7	33	23	25	32	35	11	31	30	2	58	15	14	1	3	14	1	5	13	2	16	1	4	3	8	1	1	1	4	1
ADGRF2	15	8	21	38	57	51	13	16	17	1	1	2	2	1	6	2	1	1	2	7	17	14	10	11	28	17	23	3	2	7	8	4	1	1	4	1	2	1	5	2	1	1	1	2	1	1	3	4	3
ADGRF3	10	10	11	24	28	30	4	9	17	1	1	1	1	1	5	1	1	1	1	4	11	4	5	14	12	14	11	5	2	8	3	3	1	1	8	1	1	3	4	2	1	1	1	1	2	2	1	3	1
ADGRF4	8	12	14	36	35	49	9	12	16	2	3	3	2	1	7	1	1	4	6	9	16	13	20	16	23	26	22	10	5	10	4	7	1	3	6	1	4	1	1	4	3	2	3	3	4	1	1	5	1
ADGRF5	9	8	21	50	52	53	10	20	17	3	1	4	5	5	4	1	1	3	1	13	17	12	24	21	32	33	24	13	4	18	1	5	1	5	2	3	12	1	3	6	4	6	2	6	3	2	1	7	1
ADGRG1	18	16	23	59	39	43	8	22	32	4	5	8	5	4	6	1	1	11	19	10	47	46	43	51	38	27	32	14	8	22	18	16	1	8	14	1	10	9	15	8	11	5	4	8	13	4	7	8	2
ADGRG2	5	8	13	35	20	34	3	13	12	1	1	1	3	1	1	1	1	1	2	2	15	14	23	11	27	17	18	3	5	4	2	3	1	4	9	1	2	3	4	4	1	1	1	4	1	3	3	3	1
ADGRG3	6	11	16	48	35	46	7	11	23	1	1	5	2	2	1	1	2	1	1	8	18	19	21	25	33	23	30	6	4	8	7	3	1	3	7	1	3	2	3	6	1	2	1	5	1	1	1	1	4
ADGRG4	14	8	8	42	31	39	12	15	10	1	2	1	4	1	3	2	1	1	1	12	18	16	14	31	39	26	33	10	5	8	3	4	1	2	11	1	3	6	5	3	1	1	2	4	1	4	1	4	1
ADGRG5	10	13	18	52	35	47	4	25	21	2	2	3	1	2	6	1	1	3	1	11	10	10	18	12	18	19	16	3	3	13	10	5	1	3	15	3	3	2	1	3	2	1	2	3	3	1	3	4	1
ADGRG6	12	9	22	69	64	98	5	10	18	4	11	17	4	4	7	1	1	7	2	20	57	41	21	26	29	24	47	19	4	33	16	5	1	5	10	2	6	6	11	12	2	7	1	12	2	4	5	4	2
ADGRG7	13	13	23	40	33	39	7	27	18	3	8	7	4	1	5	2	1	4	1	11	35	19	19	24	28	17	33	10	4	23	8	3	1	2	15	1	7	5	3	6	1	3	2	7	1	2	1	8	3
ADGRL1	9	10	4	24	27	39	6	11	17	1	3	5	3	1	4	3	1	1	2	8	21	9	14	20	41	22	30	14	3	25	3	6	1	3	9	1	6	5	4	5	2	4	1	2	2	1	1	2	3
ADGRL2	14	5	9	25	29	43	7	13	12	3	1	1	5	1	4	4	1	1	1	11	17	17	26	18	34	16	32	8	5	7	4	4	1	2	9	1	7	1	6	1	4	2	1	5	3	1	1	5	1
ADGRL3	14	8	8	49	32	31	10	19	30	7	1	1	19	1	7	3	1	1	2	18	17	15	13	12	28	29	23	4	11	6	4	2	1	3	2	4	4	2	12	1	1	1	3	3	1	1	4	9	1
ADGRL4	15	17	12	41	36	46	13	12	24	1	1	1	6	1	6	1	1	1	3	19	8	15	12	17	25	20	24	2	7	8	4	2	1	3	10	1	6	3	11	5	2	3	1	3	2	1	1	3	1
ADGRV1	11	10	12	33	36	23	7	14	12	1	1	1	2	2	1	3	1	2	1	4	9	14	14	15	28	17	11	5	5	4	7	4	1	2	7	2	3	1	2	1	1	2	2	1	1	2	4	4	1
ADH1A	17	20	14	43	40	47	11	18	34	1	1	1	6	1	4	1	2	1	1	3	15	15	22	15	18	18	26	7	2	8	10	3	1	3	7	2	2	2	4	2	1	1	3	6	6	3	1	7	1
ADH1B	11	9	9	27	53	51	5	11	14	1	3	4	6	1	6	1	1	6	1	6	9	10	12	14	32	13	23	9	3	7	3	2	1	1	6	1	9	1	5	5	1	1	5	5	3	4	4	6	2
ADH4	9	9	4	25	19	25	6	8	14	1	1	1	1	1	5	5	1	1	1	10	9	9	8	6	18	14	17	5	3	5	3	2	1	2	17	1	4	1	3	1	1	1	1	1	1	2	1	1	1
ADH5	33	18	29	55	92	133	18	31	48	10	4	8	9	5	8	7	6	11	2	33	61	44	39	25	35	37	60	20	9	45	20	7	1	15	13	1	14	10	16	8	5	4	4	6	11	4	9	6	6
ADH6	9	7	9	29	29	29	4	7	11	2	1	1	1	1	3	1	1	2	1	7	11	10	6	11	21	23	14	6	1	7	5	1	1	3	9	1	2	2	2	2	1	1	2	3	2	1	1	4	2
ADH7	10	11	10	35	29	38	9	12	33	2	1	3	2	1	5	1	1	1	1	6	12	20	14	21	28	25	26	9	4	6	2	4	1	1	10	3	4	1	3	5	4	2	2	3	4	4	6	3	2
ADHFE1	7	12	20	51	43	47	16	5	11	6	3	3	6	1	3	6	6	5	1	12	15	11	15	30	47	31	25	8	7	14	7	3	1	5	7	3	10	2	2	4	1	2	1	9	4	1	1	5	2
ADI1	7	3	7	13	14	27	5	7	10	6	5	9	3	1	4	3	1	4	2	11	27	26	21	20	18	17	34	14	3	38	18	8	1	5	15	1	13	10	7	5	2	1	8	7	1	2	6	14	5
ADIG	6	7	7	25	31	26	13	8	22	1	1	1	2	1	10	1	2	6	1	6	12	10	15	18	23	22	26	5	4	8	7	3	1	2	10	4	1	1	8	2	1	1	1	3	2	3	1	3	3
ADIPOQ	6	6	13	39	33	40	14	9	37	1	3	2	3	1	4	1	2	1	1	4	15	17	23	17	38	25	13	7	5	9	4	2	1	1	7	3	5	3	3	2	1	3	1	6	4	2	1	8	2
ADIPOR1	17	18	37	45	67	89	11	17	27	3	8	12	8	6	3	3	2	17	13	11	29	18	30	27	28	27	38	16	10	50	5	22	1	8	18	1	10	9	7	10	3	6	6	8	4	1	3	8	1
ADIPOR2	10	3	16	27	27	44	6	11	17	1	1	1	7	2	5	1	1	3	1	11	28	15	17	16	20	20	28	8	5	12	9	2	1	5	29	1	7	6	4	5	1	2	1	4	3	6	3	6	1
ADIRF	72	17	139	92	150	215	34	64	41	11	5	5	20	4	13	8	5	5	2	19	46	25	40	25	52	44	50	26	8	27	8	15	1	6	10	1	19	10	16	15	6	4	6	13	5	1	2	5	3
ADK	16	11	29	46	38	63	14	17	24	4	3	5	8	4	9	1	1	4	4	11	27	18	22	23	36	15	31	10	3	21	9	7	1	4	17	3	12	8	9	12	4	9	6	7	6	3	3	17	6
ADM	21	7	34	95	76	142	15	19	47	2	5	11	6	6	6	2	2	16	14	9	82	19	22	17	19	23	102	38	4	17	9	45	1	3	10	1	4	4	16	10	10	6	6	7	3	4	7	11	1
ADM2	13	5	19	30	32	37	11	11	25	2	1	4	1	1	3	1	2	7	1	12	25	16	12	20	22	11	32	7	2	14	6	4	1	1	12	1	5	6	3	3	5	4	5	7	4	2	1	4	1
ADM5	11	12	16	33	26	38	5	4	22	1	3	1	3	2	5	1	1	1	1	8	20	22	25	21	31	18	18	8	8	6	6	6	1	3	8	1	2	2	3	5	4	1	4	3	3	2	1	7	3
ADNP	32	25	35	53	96	107	17	25	46	7	12	33	11	9	10	4	7	26	11	22	55	36	53	38	46	28	67	34	14	97	22	22	1	14	27	3	20	21	20	25	6	14	6	17	5	5	1	7	4
ADNP2	16	21	19	51	48	57	13	21	30	4	6	10	5	5	10	7	4	8	3	11	27	21	24	29	33	30	41	11	6	22	13	9	1	4	14	3	5	4	15	3	6	4	11	11	5	4	6	6	1
ADO	10	14	17	53	45	53	10	12	18	2	3	1	1	1	8	1	1	3	1	13	28	23	23	23	21	13	26	11	5	19	3	5	1	2	8	3	7	7	9	3	5	1	1	7	8	2	1	3	2
ADORA1	10	4	9	23	26	26	5	9	12	1	3	10	4	2	1	3	1	5	1	5	17	6	10	20	21	22	14	10	5	8	3	5	1	3	9	1	3	1	5	1	2	3	2	2	2	2	2	5	4
ADORA2A	7	7	15	35	27	24	7	10	14	2	1	2	3	1	3	1	2	1	1	7	14	12	14	12	35	26	26	2	3	6	1	2	1	7	4	1	4	3	4	1	2	1	1	4	4	2	1	4	2
ADORA2B	9	7	16	41	29	34	8	10	13	6	2	7	1	3	2	1	2	3	1	15	14	25	18	20	34	27	28	8	5	13	9	7	1	6	5	1	5	7	6	5	2	1	3	4	4	1	3	4	1
ADORA3	19	19	13	26	39	52	16	25	24	1	1	1	5	1	5	1	1	1	1	7	19	23	17	19	37	24	25	10	3	9	5	2	1	5	10	2	2	1	6	3	3	1	4	4	3	2	3	4	2
ADPGK	9	17	18	37	38	56	13	14	24	4	5	6	6	4	7	3	2	8	1	14	22	43	25	32	43	27	50	14	6	38	9	12	1	8	7	3	12	5	21	8	6	7	5	9	2	2	3	6	2
ADPRH	21	12	24	37	36	65	13	18	32	1	3	2	5	1	4	1	2	3	1	9	21	16	13	27	19	26	27	12	5	15	5	4	1	7	9	2	8	4	8	7	3	2	2	1	1	1	1	9	1
ADPRHL1	17	7	25	46	36	54	10	20	22	3	2	3	6	1	5	1	1	2	2	11	16	14	19	26	25	30	26	7	2	16	3	5	1	2	113	8	3	2	4	6	2	1	2	7	1	1	3	5	3
ADPRM	11	13	13	38	38	37	14	5	26	1	3	3	2	1	3	3	5	10	1	15	19	18	22	19	40	28	34	10	8	13	6	3	1	3	5	1	5	4	3	5	3	2	1	4	3	2	2	5	1
ADPRS	219	104	192	255	466	712	100	231	176	11	23	21	20	7	7	8	7	23	14	41	104	86	74	55	43	32	97	49	12	96	35	20	1	17	34	1	20	34	11	26	16	17	9	18	7	1	2	11	3
ADRA1A	7	11	8	23	25	29	4	14	27	1	1	1	1	1	4	1	1	4	1	10	14	12	18	14	26	30	28	2	2	11	6	3	1	3	6	1	5	1	4	2	1	1	2	5	3	2	3	8	1
ADRA1B	6	11	15	21	23	25	11	14	10	1	1	1	1	1	2	1	1	1	1	4	14	18	6	14	25	18	20	14	4	11	9	2	1	2	5	1	4	3	5	6	2	2	2	6	1	2	1	4	1
ADRA1D	11	6	15	40	29	33	12	15	13	3	2	3	4	2	4	2	1	1	1	10	23	25	28	32	46	27	58	6	5	8	9	5	1	2	10	1	21	3	2	3	3	2	1	8	1	2	3	3	3
ADRA2A	18	7	19	33	27	31	5	23	18	3	15	10	2	3	4	5	1	7	2	7	22	14	21	21	27	19	37	5	10	10	6	2	1	2	6	1	6	4	4	5	2	3	2	2	1	1	2	8	2
ADRA2B	15	7	16	43	46	70	12	25	26	5	2	2	4	1	5	2	1	1	2	10	17	11	19	23	34	30	35	5	5	8	5	6	1	7	7	2	10	2	3	3	3	3	3	7	6	1	1	7	1
ADRA2C	12	11	12	38	24	38	2	11	14	1	1	1	4	2	1	1	1	1	1	7	10	12	10	9	20	16	20	5	4	9	1	5	1	2	17	1	1	1	3	5	1	2	2	6	2	1	2	4	1
ADRB1	761	348	715	1322	2334	2230	201	738	574	10	16	24	17	2	11	11	2	26	7	93	278	204	180	163	64	45	255	68	26	113	70	38	1	19	31	2	43	29	15	22	7	12	8	50	25	1	2	13	4
ADRB2	15	7	15	41	30	44	5	11	16	1	1	1	1	1	6	1	1	1	2	15	19	11	14	15	41	17	31	4	4	5	4	3	1	2	11	5	2	4	4	1	3	6	1	2	1	1	3	10	3
ADRB3	7	10	5	30	19	29	6	9	9	1	2	1	3	1	2	1	1	1	1	2	6	13	10	15	10	17	22	5	5	5	4	3	1	3	21	1	1	1	3	1	1	1	2	3	1	1	2	4	1
ADRM1	29	14	29	52	71	81	8	22	26	5	11	16	4	9	8	2	1	21	9	14	36	45	51	39	33	16	31	24	6	39	18	12	1	8	13	3	10	14	14	19	10	15	6	7	5	4	2	9	1
ADSL	24	12	24	56	44	58	10	26	35	4	1	1	10	5	3	3	1	3	1	11	33	22	32	26	36	28	41	16	11	17	11	8	1	10	12	2	11	5	8	13	2	5	8	5	8	3	3	6	1
ADSS1	20	11	14	39	26	41	8	11	25	2	1	3	2	1	3	2	1	2	1	6	13	13	15	12	29	13	14	7	3	17	6	2	1	2	4	1	3	1	3	3	3	2	3	3	22	3	1	8	2
ADSS2	29	22	90	71	194	249	13	55	33	8	38	49	4	18	2	4	2	74	29	20	65	41	57	39	23	27	56	70	7	108	45	40	1	12	28	2	20	43	10	32	7	19	4	41	2	3	2	8	2
ADTRP	14	9	15	59	39	37	13	21	24	2	5	2	4	4	2	1	1	1	1	8	19	20	25	15	42	30	23	19	1	13	5	6	1	2	9	2	9	8	6	9	2	1	3	4	1	2	1	6	1
AEBP1	9	25	22	66	38	51	21	16	41	10	1	6	19	1	7	10	6	10	3	25	16	13	19	24	30	17	25	10	11	10	7	13	1	14	8	1	22	1	34	5	20	5	4	12	7	4	6	10	3
AEBP2	16	18	17	55	54	92	22	15	24	4	4	9	10	8	6	7	4	7	4	14	30	30	31	31	37	15	55	34	4	60	22	13	1	6	22	1	15	17	13	14	9	9	3	13	8	1	6	8	2
AEN	12	18	38	40	56	70	13	21	36	1	3	10	3	1	1	1	1	2	1	17	34	28	23	30	39	29	48	17	4	13	14	3	1	1	11	3	7	2	17	6	6	7	8	5	1	2	3	5	1
AFAP1	21	14	23	65	36	51	13	13	31	2	1	1	2	3	3	2	1	7	2	11	30	29	24	37	38	25	32	12	4	20	9	3	1	5	14	5	9	2	2	3	1	2	4	3	5	3	5	3	5
AFAP1L1	20	16	19	35	37	44	12	14	21	2	1	2	2	2	5	1	1	2	1	18	22	28	20	21	23	23	34	10	3	7	5	1	1	2	28	2	4	1	5	1	2	1	3	3	3	3	4	8	1
AFAP1L2	18	18	24	63	43	53	18	20	45	16	12	10	18	2	17	3	6	11	3	16	48	44	49	63	63	50	58	7	15	14	8	11	1	10	5	2	23	3	16	4	7	6	2	8	9	2	1	10	2
AFDN	15	11	18	37	64	68	14	14	22	3	11	20	6	8	3	3	1	20	7	13	49	37	45	34	24	14	54	40	8	81	25	13	1	4	26	2	2	26	10	20	5	15	1	18	5	2	1	2	1
AFF1	21	13	19	50	57	56	9	23	28	2	7	14	9	3	6	3	3	11	4	15	42	32	24	21	31	30	41	24	8	39	23	7	1	8	18	2	13	7	12	7	11	6	4	9	6	3	5	11	3
AFF2	14	10	18	41	33	57	11	17	17	1	1	1	1	1	6	1	1	2	2	5	14	10	17	18	26	17	25	4	6	10	6	4	1	3	9	2	3	1	3	1	1	1	1	4	7	2	3	5	4
AFF3	19	9	18	40	44	42	6	20	23	1	1	1	5	1	6	2	1	2	3	9	17	17	18	19	35	24	25	7	9	7	8	2	1	1	13	1	4	7	11	1	1	1	3	5	1	3	1	7	3
AFF4	13	7	21	44	40	71	15	19	13	2	5	7	3	3	1	3	2	9	4	15	21	9	20	11	28	22	29	15	6	40	9	9	1	2	14	1	6	12	4	6	7	5	1	5	3	3	2	9	4
AFG1L	17	8	10	30	31	24	10	12	15	2	1	1	1	1	2	1	1	2	2	10	12	14	16	24	18	20	27	8	4	13	6	4	1	1	10	1	6	5	1	2	1	1	1	4	3	1	2	6	2
AFG3L2	11	11	22	168	53	65	10	21	25	3	6	7	4	4	5	2	3	8	3	15	47	29	31	33	36	25	50	22	4	31	12	14	1	8	14	2	10	10	9	9	7	3	6	12	2	3	3	5	1
AFM	7	7	15	43	30	30	10	14	19	2	2	1	2	1	5	2	1	2	1	14	17	11	18	24	38	34	28	12	3	11	4	1	1	1	17	2	6	3	4	2	3	1	2	4	1	2	3	5	1
AFMID	12	6	13	34	24	36	7	14	12	1	1	1	3	1	1	2	1	1	2	6	18	13	19	18	20	14	33	4	2	12	5	4	1	3	103	1	5	2	1	1	1	2	2	4	3	2	2	7	2
AFP	16	10	7	33	25	34	9	12	16	2	3	1	1	1	4	1	3	1	1	16	17	10	12	17	26	19	20	9	2	6	3	2	1	2	10	1	4	3	6	5	2	1	1	2	1	3	5	7	1
AFTPH	8	9	7	24	14	47	14	16	22	1	2	1	7	2	5	1	2	2	4	9	30	19	18	20	25	20	29	13	5	17	5	4	1	2	6	1	7	6	6	4	4	4	2	7	2	2	3	6	1
AGA	23	19	19	64	54	55	20	14	32	1	1	5	1	1	5	2	1	7	2	7	21	22	29	20	28	23	36	12	11	21	9	7	1	2	12	1	8	7	10	10	4	2	4	5	2	7	1	3	1
AGAP1	24	13	25	50	74	80	16	25	34	2	4	10	4	2	6	3	1	6	4	15	30	30	29	25	47	33	40	15	9	27	6	7	1	7	7	6	5	29	2	5	4	3	2	7	3	8	2	11	4
AGAP2	20	16	14	50	50	52	12	20	32	1	3	5	3	1	5	2	4	3	2	10	23	16	17	14	23	19	32	11	7	7	6	7	1	2	9	5	8	2	3	1	4	2	1	7	4	1	1	6	2
AGAP3	16	7	20	53	52	53	8	21	23	5	4	8	5	4	6	1	4	11	7	19	39	33	35	34	37	17	53	29	6	56	19	18	1	8	31	2	12	20	9	14	10	11	5	24	5	5	4	4	5
AGAP9	27	12	23	29	40	80	15	18	27	4	5	10	6	3	13	2	2	7	7	20	36	28	26	31	27	27	51	39	17	66	15	19	1	72	28	2	17	33	6	18	9	12	1	17	4	4	1	10	4
AGBL1	11	15	19	44	40	29	8	18	21	1	1	2	5	1	4	1	1	3	1	10	21	17	17	22	33	14	30	4	3	5	4	3	1	2	11	3	1	2	4	7	5	1	1	7	2	1	2	5	2
AGBL2	13	5	17	52	35	46	6	21	26	1	2	1	2	1	5	1	1	1	6	9	18	17	21	22	34	24	38	7	11	7	2	1	1	1	12	4	3	2	4	1	1	5	1	9	2	2	1	6	1
AGBL3	10	10	8	27	25	31	9	11	13	1	2	2	4	1	5	2	1	3	1	5	8	19	19	17	26	23	24	5	3	8	7	4	1	5	4	2	6	1	10	2	3	3	1	3	2	1	1	4	1
AGBL4	17	15	12	40	41	44	13	13	19	1	1	1	6	2	1	1	1	1	2	7	16	14	21	12	16	15	22	10	5	10	6	6	1	3	8	4	6	2	5	7	1	2	2	7	3	1	1	8	2
AGBL5	46	22	66	88	114	171	25	56	46	6	3	7	7	3	4	1	1	8	4	26	81	50	55	41	41	30	82	37	8	41	22	12	1	11	15	1	13	10	11	8	8	3	5	19	6	11	17	24	13
AGER	6	9	18	25	22	30	4	11	12	2	2	3	5	1	6	1	1	1	2	9	19	12	11	10	17	13	25	8	4	4	5	2	1	1	8	2	4	1	1	4	2	3	1	5	2	2	1	2	1
AGFG1	24	7	37	49	49	90	8	19	24	5	21	44	13	14	5	4	6	34	14	11	48	22	26	29	21	14	39	25	15	61	6	12	1	7	15	1	13	12	18	30	13	14	7	9	4	3	5	17	4
AGFG2	13	12	22	32	57	43	11	19	17	4	4	8	2	2	8	2	2	13	3	13	25	28	19	18	43	13	20	23	3	30	5	9	1	7	8	1	3	9	2	7	1	5	3	16	1	1	2	3	2
AGGF1	25	17	23	51	49	54	5	29	23	2	6	6	3	3	7	1	2	6	1	19	26	22	23	27	31	31	46	17	9	26	12	6	1	7	11	3	15	4	8	6	5	3	3	5	3	1	2	9	2
AGK	18	10	17	51	42	44	2	24	24	5	2	9	5	2	4	4	1	6	4	13	36	21	28	31	44	18	35	23	4	18	10	12	1	5	21	3	8	6	11	8	1	4	2	6	2	1	1	3	3
AGL	12	16	13	47	43	40	10	14	22	5	1	4	2	1	4	2	4	4	1	4	14	27	21	27	30	31	26	9	6	15	3	2	1	4	9	3	8	4	5	1	1	1	1	2	1	3	2	6	3
AGMAT	15	11	18	46	35	29	9	13	9	2	3	2	4	2	6	1	1	1	1	8	23	17	16	18	26	26	27	11	6	17	5	1	1	3	16	3	4	1	2	5	1	1	2	2	3	2	2	3	4
AGMO	16	9	14	38	43	49	11	17	19	1	2	2	2	2	2	3	2	1	1	8	17	8	22	15	19	18	14	14	4	8	10	3	1	6	7	2	6	4	2	1	1	1	3	3	1	1	4	3	1
AGO1	25	21	94	136	204	157	20	29	42	4	5	4	8	2	6	4	1	7	1	21	39	18	25	35	53	20	39	13	6	33	9	8	1	7	12	1	14	6	10	10	5	6	2	10	6	4	2	7	1
AGO2	21	15	27	43	54	96	11	20	19	2	12	4	7	6	2	4	2	9	1	16	24	18	24	33	24	23	28	20	6	37	10	9	1	4	9	1	6	15	11	24	11	25	3	6	3	1	6	5	1
AGO3	7	13	19	32	37	49	12	20	12	1	3	2	9	1	6	1	1	5	2	6	19	18	14	17	34	22	31	11	11	23	4	2	1	2	11	2	7	7	5	3	3	2	2	9	3	1	4	4	1
AGO4	10	12	14	33	42	42	13	12	18	2	3	2	3	3	4	2	3	2	1	13	20	17	19	28	34	20	34	15	12	35	11	7	1	4	11	2	8	11	5	9	8	3	1	2	2	2	1	4	1
AGPAT1	24	28	29	88	83	79	13	25	41	9	13	38	15	3	18	8	7	36	14	27	37	30	30	32	39	35	36	20	13	55	13	14	1	9	18	2	29	16	17	12	8	9	8	5	9	1	3	8	3
AGPAT2	47	12	46	42	78	164	7	28	33	4	27	32	4	16	5	1	1	26	8	31	311	128	82	83	32	28	219	61	10	105	37	28	1	4	25	3	11	22	12	62	7	21	1	20	1	2	4	9	4
AGPAT3	9	14	19	37	38	52	10	15	24	3	10	4	2	1	3	2	1	9	2	7	31	32	20	21	29	21	30	9	6	19	5	6	1	4	7	4	6	4	5	2	1	2	1	7	3	2	3	9	1
AGPAT4	17	15	14	38	28	49	12	17	15	2	1	3	4	1	2	2	1	1	1	6	19	15	22	22	24	20	25	7	5	9	8	1	1	1	5	1	6	2	3	4	3	3	2	8	5	2	1	2	1
AGPAT5	7	14	13	48	35	27	7	12	20	5	3	3	5	1	2	1	1	7	2	12	24	15	21	14	32	29	28	6	6	7	7	1	1	2	8	5	7	2	6	1	2	1	2	8	4	3	2	8	1
AGPS	29	21	38	79	71	93	18	25	48	12	16	26	18	13	7	6	8	21	20	22	44	33	20	24	33	34	61	18	11	46	14	12	1	12	15	4	24	14	14	5	17	5	2	19	9	3	6	11	3
AGR2	173	17	192	39	727	744	8	118	16	10	55	64	3	13	6	1	2	24	5	13	137	43	42	35	27	26	71	212	5	267	322	42	1	2	115	1	19	49	8	56	2	19	2	23	2	1	1	3	2
AGR3	20	5	33	40	90	143	6	17	33	4	20	12	3	6	2	1	1	8	6	9	74	20	27	28	28	17	52	78	3	66	67	13	1	4	31	2	8	28	8	15	2	7	2	23	3	3	3	4	2
AGRN	61	34	56	74	119	112	19	51	40	3	14	13	4	5	5	2	4	15	13	27	170	146	161	147	38	23	178	25	10	90	33	37	1	3	22	4	9	20	14	63	11	41	6	33	6	1	10	18	3
AGRP	9	12	14	29	25	43	15	18	16	2	1	1	1	1	7	1	1	2	1	7	20	14	17	33	28	20	32	5	5	4	5	5	1	1	11	1	2	3	3	1	1	2	3	2	1	1	2	3	1
AGT	10	6	12	27	27	25	4	12	14	1	2	2	1	1	1	2	1	4	1	6	19	18	21	21	28	17	16	1	4	11	8	1	1	5	6	1	9	1	3	4	3	2	1	6	2	2	2	1	7
AGTPBP1	11	15	12	38	35	53	6	13	23	2	7	3	11	1	7	1	3	4	1	14	29	25	22	28	42	33	25	21	6	24	3	5	1	4	12	1	16	2	3	7	5	2	3	5	3	1	2	1	3
AGTR1	7	14	24	32	31	36	9	14	13	1	2	5	3	1	2	1	1	1	1	18	9	15	11	17	26	20	40	7	5	5	4	3	1	1	5	3	7	2	3	3	2	1	1	1	2	1	3	2	3
AGTR2	12	12	16	28	40	43	4	10	22	3	1	5	3	1	6	1	1	1	2	11	24	28	22	32	33	28	33	6	6	12	2	6	1	4	12	2	9	3	7	2	3	1	1	5	4	2	1	7	1
AGTRAP	12	10	13	45	48	52	4	15	26	1	6	6	4	3	6	1	2	6	5	10	18	20	15	22	27	19	24	8	3	19	10	12	1	3	8	1	6	3	8	5	1	1	3	5	3	1	1	3	2
AGXT	15	14	21	47	45	53	14	16	24	1	1	2	2	1	1	1	1	3	1	7	18	18	23	19	43	17	29	7	49	9	6	6	1	6	4	1	8	1	3	2	3	2	1	1	3	2	4	13	3
AGXT2	9	8	10	18	26	29	8	9	17	1	2	1	1	1	5	1	1	1	1	8	9	10	23	17	19	18	23	5	3	5	6	2	1	11	5	1	3	2	4	2	2	1	2	5	2	3	2	3	1
AHCTF1	29	7	26	40	55	78	9	20	20	4	9	7	6	8	11	2	2	8	5	11	14	23	27	16	28	27	24	17	12	32	15	9	1	2	15	4	10	4	15	13	2	6	2	5	13	1	4	3	1
AHCY	30	15	28	56	62	64	11	26	30	1	8	22	4	7	4	2	2	11	1	13	43	30	40	26	37	31	54	30	8	55	13	12	1	10	16	2	12	13	8	9	2	1	3	11	2	4	7	10	1
AHCYL1	20	18	33	79	76	90	25	22	37	8	20	19	19	10	14	12	4	33	15	28	63	41	47	51	54	42	68	31	13	67	28	18	1	7	30	1	19	18	18	18	9	11	8	17	6	57	2	13	4
AHCYL2	25	9	32	51	45	57	8	29	19	3	8	9	5	3	4	3	2	12	2	7	58	19	30	26	26	21	45	23	5	66	10	14	1	2	17	5	11	23	2	22	2	3	1	1	1	2	1	7	1
AHDC1	11	6	9	32	17	35	7	5	16	1	1	2	1	2	5	1	1	2	1	2	10	13	14	16	13	21	17	9	5	9	8	5	1	3	21	1	2	4	3	5	1	2	1	2	1	2	4	5	1
AHI1	7	5	24	48	37	39	13	14	24	4	7	7	12	3	5	1	2	15	2	12	24	23	17	23	37	21	29	22	3	22	13	5	1	4	18	1	9	8	16	9	6	4	3	10	6	2	1	5	2
AHNAK	34	49	46	78	113	121	30	37	77	15	19	36	35	11	33	34	12	24	6	60	146	77	73	51	100	90	118	27	25	47	22	27	1	12	23	1	48	10	26	16	13	15	15	17	26	5	8	21	2
AHNAK2	22	11	29	34	83	142	10	49	31	1	10	13	4	1	1	1	1	21	9	8	60	41	28	50	34	19	54	6	6	17	6	18	1	4	9	4	3	4	5	21	3	17	4	9	1	1	5	14	1
AHR	28	36	28	74	97	115	40	27	57	44	37	44	72	15	48	44	34	43	22	29	53	54	34	33	42	40	41	27	19	50	17	18	1	5	24	1	38	12	41	22	19	14	22	23	22	2	4	10	2
AHRR	15	13	15	31	36	50	12	18	19	1	1	1	1	3	4	1	1	1	1	6	26	11	12	18	33	27	28	4	2	7	6	5	1	4	13	2	6	6	6	2	5	1	3	4	2	3	3	3	3
AHSA1	19	11	24	42	51	59	8	28	16	3	2	2	4	1	4	2	1	3	2	9	14	13	13	13	17	11	30	4	6	21	12	16	1	4	17	1	6	3	4	7	4	1	2	11	4	2	2	8	1
AHSG	13	15	19	31	27	49	14	8	17	2	1	3	3	1	4	1	1	2	3	16	10	15	12	20	24	18	33	7	2	14	7	4	1	8	4	2	4	2	3	3	2	2	2	2	5	4	1	6	1
AHSP	13	9	17	36	41	37	3	5	23	1	3	3	1	1	2	2	1	1	1	10	14	16	9	6	23	17	23	3	3	5	4	1	1	4	5	1	4	3	3	1	1	1	1	4	2	1	3	10	1
AICDA	10	5	11	33	28	32	11	11	18	1	1	1	2	1	3	1	1	1	1	4	20	16	17	16	33	26	19	6	4	9	3	1	1	2	8	1	3	3	2	2	3	1	3	3	1	1	3	7	4
AIDA	24	12	35	82	86	114	16	30	31	8	24	61	16	12	11	4	6	42	34	25	38	27	31	21	35	27	43	31	12	77	6	13	1	11	40	1	18	23	17	22	9	9	8	11	5	1	5	8	1
AIF1	105	57	131	269	299	331	51	120	148	7	4	6	13	1	12	11	9	4	2	28	50	42	39	44	50	28	63	16	12	24	9	9	1	6	14	3	14	6	16	7	1	2	9	6	13	2	3	6	1
AIF1L	12	6	10	44	23	31	8	7	14	2	4	6	1	1	7	1	2	4	3	5	11	12	15	15	22	22	19	7	4	6	4	5	1	3	12	2	5	3	4	3	5	2	3	6	6	2	1	6	2
AIFM1	14	9	15	45	46	62	16	22	17	1	2	1	1	1	3	3	1	5	1	9	39	33	27	24	35	16	40	8	7	17	7	6	1	3	15	1	4	4	4	6	1	2	3	3	1	2	1	5	1
AIFM2	114	71	161	277	183	342	67	136	115	5	4	11	5	2	9	2	3	8	3	31	111	104	96	88	51	48	151	26	20	52	21	21	1	7	19	4	23	13	16	19	10	11	3	20	6	3	2	9	1
AIFM3	21	25	31	66	70	98	13	31	45	5	1	5	5	6	2	2	2	5	3	8	20	27	25	16	16	18	29	10	5	16	2	5	1	2	3	1	5	3	3	3	2	1	3	6	2	1	1	3	1
AIG1	4	7	4	30	29	27	2	5	11	1	3	7	2	1	2	1	1	6	2	3	11	9	11	9	9	9	24	7	4	16	4	2	1	4	6	1	2	2	2	5	1	2	1	4	1	1	4	10	2
AIM2	8	10	23	36	27	36	8	15	20	1	1	1	2	1	1	1	1	4	1	8	12	16	14	19	24	20	12	5	4	10	5	2	1	3	12	1	2	3	5	1	4	1	1	6	3	2	1	3	2
AIMP1	19	14	34	54	73	93	10	26	25	1	3	11	4	3	4	3	2	6	3	10	35	20	18	28	34	25	33	16	9	39	20	13	1	4	20	1	9	9	7	8	3	7	1	7	1	1	2	7	1
AIMP2	16	19	23	28	49	57	13	17	15	3	3	3	2	2	4	3	1	3	1	12	18	16	21	20	37	29	26	17	4	20	7	4	1	4	18	1	5	5	8	7	1	3	3	8	3	1	4	6	1
AIP	19	15	26	64	63	78	9	26	17	1	2	4	8	3	5	1	4	7	4	12	29	10	13	27	32	18	26	11	7	18	7	6	1	5	8	1	8	2	11	4	3	3	4	12	4	7	1	9	2
AIPL1	11	6	14	33	43	31	8	12	15	1	1	1	1	1	3	1	1	4	1	8	15	16	15	15	20	14	25	4	8	11	1	3	1	1	6	1	4	1	3	5	2	1	2	3	1	1	4	3	2
AIRE	13	12	11	33	31	45	10	13	11	1	1	2	3	1	1	1	2	3	2	7	14	11	15	19	29	15	20	9	2	10	3	2	1	1	4	2	5	3	5	4	3	2	4	9	3	1	4	6	1
AJAP1	13	18	8	36	25	40	10	6	19	1	1	2	4	1	6	1	1	4	1	10	18	13	14	17	34	27	25	4	3	7	3	4	1	1	8	5	2	2	5	1	1	1	1	5	3	4	3	5	3
AJM1	17	18	18	42	47	54	12	13	26	3	2	5	2	1	4	1	3	3	2	7	21	20	25	25	48	36	40	5	9	17	11	11	1	2	21	2	7	2	6	1	1	3	4	4	2	1	1	9	3
AJUBA	27	15	21	48	62	65	6	28	34	2	4	6	3	2	6	1	1	12	3	12	28	18	36	20	30	14	39	7	4	10	5	8	1	1	14	2	12	6	3	6	2	1	2	7	2	3	6	5	1
AK1	50	26	64	111	90	103	26	45	41	12	12	18	16	8	16	4	3	14	1	22	92	65	52	48	34	30	70	12	16	28	16	14	1	3	8	2	23	9	14	10	8	3	5	10	6	2	2	1	1
AK2	26	19	34	91	71	91	14	36	40	10	12	16	16	10	12	7	4	15	11	46	70	47	39	43	33	32	74	37	15	64	25	25	1	7	20	3	20	19	19	27	12	12	4	23	8	7	2	15	9
AK3	23	20	27	42	67	74	14	22	32	7	9	23	8	9	5	3	4	13	10	24	39	28	28	39	27	33	38	5	15	23	8	7	1	5	10	1	10	8	9	4	5	3	2	7	4	2	7	6	1
AK4	27	15	20	61	65	79	28	20	32	5	16	18	7	1	7	2	1	10	8	16	82	52	35	38	30	29	70	16	8	33	10	15	1	9	10	3	6	7	6	13	6	4	1	11	4	3	4	9	3
AK5	10	5	15	27	11	26	11	5	23	1	1	1	4	1	2	2	1	1	1	14	8	15	9	6	22	23	21	3	2	5	4	2	1	1	18	3	1	3	5	1	1	1	3	2	2	4	4	3	1
AK6	13	13	14	46	40	46	6	14	22	4	9	3	8	3	4	3	1	6	3	7	20	25	23	17	26	20	34	11	7	23	10	5	1	2	6	1	9	7	3	3	1	5	3	5	1	4	1	3	2
AK7	33	27	47	64	79	106	21	40	38	1	2	3	8	3	4	1	3	1	1	12	27	26	18	19	37	21	34	17	8	14	11	3	1	4	7	1	14	6	10	6	9	4	7	8	3	6	4	4	2
AK8	57	30	65	74	156	228	27	58	44	1	4	4	4	1	3	1	1	4	6	10	30	22	24	21	31	25	30	11	3	22	5	6	1	9	8	2	5	1	3	2	1	2	2	4	1	1	7	3	1
AK9	9	7	11	30	26	25	5	3	16	1	1	1	2	1	5	1	1	3	1	8	16	14	22	15	33	16	22	8	2	8	5	3	1	5	13	5	1	3	3	1	3	4	2	1	1	1	1	6	2
AKAIN1	12	12	14	37	29	27	8	11	17	1	1	3	1	1	6	2	1	1	1	8	18	11	19	13	20	24	21	11	4	7	2	4	1	2	6	3	7	4	1	2	1	3	1	6	1	1	5	8	1
AKAP1	40	11	41	58	85	92	12	36	35	4	33	27	6	12	4	1	1	29	11	12	85	72	53	41	37	28	93	28	3	44	20	16	1	4	24	2	16	14	7	18	2	8	1	12	6	1	10	21	1
AKAP10	13	11	20	42	43	48	11	18	27	2	6	4	3	1	2	2	2	3	4	11	19	19	23	11	36	30	23	10	1	19	3	3	1	2	5	1	6	1	8	8	3	3	3	4	3	1	2	5	1
AKAP11	22	10	26	58	72	84	12	17	25	3	5	9	7	5	10	3	3	11	4	17	35	42	28	41	41	23	33	19	3	50	11	22	1	11	12	4	17	11	13	7	3	6	3	15	5	6	7	21	6
AKAP12	18	24	22	82	53	125	22	18	59	15	1	25	32	7	19	13	12	41	10	34	25	18	26	26	54	34	29	12	26	27	7	10	1	14	13	1	46	5	34	33	18	37	6	8	13	1	4	16	4
AKAP13	24	20	32	62	71	91	12	20	33	7	7	10	11	1	4	8	6	12	7	20	35	28	24	27	32	21	31	20	19	55	10	14	1	10	16	1	20	14	22	15	14	14	5	10	10	5	2	7	2
AKAP14	16	12	19	40	37	47	17	11	21	1	1	2	1	1	3	1	2	1	1	9	14	19	22	11	34	27	26	10	6	9	2	3	1	4	7	4	5	1	4	4	5	2	1	6	3	2	3	5	1
AKAP17A	11	3	14	29	37	49	13	14	15	3	6	5	5	1	5	3	1	8	1	17	21	19	20	28	33	13	24	5	10	14	1	4	1	1	10	1	7	6	9	5	3	3	3	4	4	5	1	6	3
AKAP3	11	10	15	32	41	44	6	6	14	1	1	1	4	1	2	2	1	1	1	10	15	12	13	11	18	13	29	4	5	7	5	4	1	1	9	1	2	1	2	3	5	1	4	3	1	1	3	5	3
AKAP4	7	10	19	31	33	50	16	13	13	1	1	2	2	1	2	1	1	1	1	9	9	14	10	17	31	17	21	1	3	8	6	5	1	3	13	1	5	1	3	5	3	1	1	4	2	2	2	9	2
AKAP5	13	8	17	34	34	37	6	9	21	2	1	5	2	1	6	1	2	5	3	9	20	18	28	27	26	32	26	8	1	10	9	3	1	2	16	2	6	2	2	2	1	4	4	6	3	2	3	6	2
AKAP6	15	9	11	44	31	43	11	10	20	1	1	1	3	1	5	1	1	1	1	6	8	7	17	19	35	20	17	5	5	4	1	4	1	5	4	1	8	1	4	4	5	1	2	7	3	4	1	9	3
AKAP7	7	9	11	38	28	29	8	8	27	3	2	3	1	1	4	1	2	1	2	4	11	23	16	16	33	16	21	9	7	11	11	3	1	3	7	2	6	4	5	6	4	1	1	2	4	2	1	6	3
AKAP8	16	19	17	47	51	77	14	18	29	1	7	15	6	9	3	5	3	8	6	25	21	24	20	22	35	31	35	23	7	36	16	9	1	8	15	4	7	6	7	12	6	8	3	10	5	2	4	5	4
AKAP8L	19	14	16	30	54	52	13	21	18	2	4	6	1	1	2	2	3	4	6	14	9	22	16	17	22	19	29	10	7	37	9	10	1	4	17	1	14	8	9	8	2	2	1	10	4	1	3	9	5
AKAP9	4	4	12	28	28	39	11	13	20	2	3	1	3	3	1	2	1	3	1	8	12	14	13	20	25	22	22	11	7	17	12	7	1	1	10	1	8	3	3	8	1	1	3	3	1	5	3	8	2
AKIP1	26	15	24	44	57	64	13	23	30	3	4	4	7	2	2	3	2	4	1	18	32	16	27	26	24	27	33	4	6	14	6	7	1	7	13	4	9	3	4	3	9	2	1	7	1	3	4	1	1
AKIRIN1	20	14	26	55	56	89	9	21	24	12	12	11	14	14	12	10	8	23	16	10	59	41	42	35	40	22	63	34	13	80	29	12	1	8	21	1	16	22	15	31	10	22	4	9	4	1	3	9	1
AKIRIN2	10	16	12	52	39	59	9	11	30	3	20	26	8	7	14	4	1	32	11	11	26	19	21	27	25	18	34	23	10	44	8	11	1	6	18	1	13	9	11	12	6	8	9	6	4	2	1	7	3
AKNA	14	8	16	38	28	40	10	9	14	5	3	5	9	2	5	5	1	3	2	10	19	20	20	19	22	20	31	13	4	19	4	5	1	2	9	2	3	5	4	9	5	3	2	7	1	1	5	3	2
AKNAD1	10	7	15	36	30	55	11	21	21	1	1	1	1	2	1	1	1	1	1	9	13	19	16	21	36	17	24	11	4	11	2	3	1	1	9	2	3	1	1	1	2	3	1	2	4	1	1	4	2
AKR1A1	51	29	69	79	122	147	26	45	50	11	11	18	15	4	6	4	5	14	10	19	80	48	43	43	41	27	60	58	10	86	25	20	1	8	32	1	17	17	7	26	12	15	3	13	8	3	1	3	3
AKR1B1	23	12	28	70	65	58	16	32	30	11	5	2	15	8	19	5	4	8	8	26	27	21	20	27	33	31	38	11	12	18	9	19	1	4	10	3	11	6	10	3	3	4	9	10	8	2	2	3	2
AKR1B15	22	13	18	42	24	33	7	30	11	4	4	1	4	3	1	2	2	1	1	5	57	15	27	21	17	22	43	9	8	15	5	2	1	1	10	2	7	1	4	2	1	1	2	4	5	1	2	2	1
AKR1C1	11	10	13	30	23	34	16	12	22	2	4	1	3	1	4	1	3	3	2	10	10	11	20	16	28	14	24	13	7	14	4	2	1	2	9	2	5	3	3	5	1	3	2	5	3	5	6	5	1
AKR1C2	8	10	14	49	40	44	14	13	25	4	2	3	3	1	2	1	1	1	3	9	17	16	18	23	28	19	28	7	5	5	3	3	1	2	3	2	3	1	6	2	1	4	2	2	1	1	1	2	1
AKR1C3	17	21	27	34	50	48	7	15	25	1	12	28	3	1	1	1	1	24	9	20	48	42	30	37	42	26	39	16	12	55	30	13	1	3	22	1	13	17	3	8	3	3	2	12	5	2	7	4	1
AKR1C4	8	11	19	37	27	39	13	14	18	1	1	2	1	1	2	2	1	1	1	5	12	15	17	16	19	12	22	5	10	8	6	5	1	1	99	2	4	1	4	2	2	1	1	2	1	5	3	6	2
AKR1D1	22	10	20	43	45	39	13	11	24	1	1	4	3	1	4	1	1	3	1	6	16	9	26	20	22	25	29	6	5	6	1	2	1	1	4	1	4	2	3	5	2	3	5	1	1	3	2	3	2
AKR1E2	87	49	102	122	222	390	49	73	69	3	17	24	4	6	3	6	1	11	7	19	60	38	45	43	60	37	54	27	11	40	11	12	1	7	24	3	15	12	14	14	12	4	8	17	3	2	6	5	3
AKR7A2	3	4	8	23	16	24	11	8	10	1	1	1	1	1	4	1	1	1	1	6	7	12	6	15	21	9	11	6	7	6	7	2	1	2	7	1	4	3	1	2	1	2	1	2	1	1	1	4	2
AKR7A3	18	7	20	35	55	61	14	20	23	2	2	7	6	3	1	1	2	4	3	7	24	27	24	19	28	18	39	29	4	45	27	9	1	3	12	2	2	9	4	6	4	3	1	5	1	1	1	2	3
AKR7L	28	14	22	49	65	71	21	20	27	4	2	4	5	1	7	1	1	1	1	9	16	16	19	26	33	27	30	9	3	18	7	4	1	1	9	4	6	5	3	4	1	2	2	3	3	1	2	7	1
AKT1	29	26	27	67	82	100	18	24	26	5	13	14	8	5	1	4	3	12	6	19	39	21	27	21	29	13	41	27	14	54	11	19	1	26	29	4	9	12	11	22	1	10	4	6	11	4	2	14	4
AKT1S1	18	13	23	45	58	62	14	29	23	2	1	8	5	1	6	1	3	8	2	14	27	25	19	18	32	26	40	13	4	24	12	9	1	11	12	2	7	8	2	3	1	5	2	6	3	4	2	9	1
AKT2	18	15	20	47	41	55	8	24	28	2	6	5	5	2	6	3	5	10	6	17	44	38	33	33	24	28	50	22	8	27	7	6	1	9	15	1	12	8	11	17	5	5	1	13	3	1	3	7	3
AKT3	13	24	24	86	70	53	13	15	48	7	1	1	9	1	8	6	7	5	1	19	9	16	14	18	50	25	40	8	20	10	2	4	1	6	6	2	24	2	19	5	6	2	6	8	7	1	1	6	1
AKTIP	11	12	20	37	48	36	9	7	19	5	1	3	4	1	2	5	1	4	1	7	16	16	17	23	26	23	20	8	7	11	9	5	1	3	30	1	9	2	5	1	3	1	2	6	1	1	2	3	1
ALAD	19	8	20	36	46	61	8	12	32	3	5	3	3	3	9	4	4	5	1	13	43	27	20	23	33	23	42	12	9	17	9	6	1	4	43	1	9	3	5	3	3	4	1	8	2	3	5	3	3
ALAS1	14	8	27	50	80	82	12	20	27	5	13	27	5	3	4	4	1	15	1	10	31	20	24	29	28	23	35	16	8	25	16	13	1	5	9	1	10	6	4	12	10	9	1	7	2	2	3	4	3
ALAS2	10	12	8	21	33	30	13	10	20	1	1	1	2	1	6	2	1	3	1	16	14	21	17	24	25	7	22	6	5	11	3	4	1	1	1	2	5	4	1	2	2	2	1	4	4	3	4	8	3
ALB	11	9	9	33	42	46	9	17	23	2	1	2	1	1	6	1	3	1	1	8	15	15	15	14	22	29	22	9	2	10	2	2	1	3	9	2	6	2	6	2	1	2	2	1	4	2	2	3	1
ALCAM	21	19	16	61	63	82	15	22	34	9	5	3	15	2	13	7	6	6	10	13	23	25	19	30	41	36	41	17	8	18	17	12	1	11	13	1	9	7	9	5	1	5	4	5	11	3	1	10	1
ALDH16A1	12	16	18	29	22	30	9	14	22	1	5	2	1	1	5	1	1	2	3	4	9	22	21	19	24	21	35	5	3	11	3	2	1	7	4	2	6	1	3	9	2	4	2	5	4	4	1	4	6
ALDH18A1	37	10	24	53	73	79	15	37	22	1	16	16	5	7	4	3	2	15	6	14	92	60	41	28	28	21	113	40	3	49	16	15	1	7	26	1	6	14	9	7	9	1	2	8	2	3	3	10	1
ALDH1A1	10	15	11	32	37	32	8	9	26	9	3	2	16	1	9	3	3	6	2	16	41	29	35	22	28	39	38	5	8	9	5	1	1	8	6	1	12	5	7	2	4	1	4	4	10	7	4	6	4
ALDH1A2	15	12	15	30	48	50	8	20	17	1	1	1	4	1	3	1	1	3	1	6	19	14	23	19	32	15	34	19	2	9	10	5	1	4	22	2	7	9	4	9	1	3	3	4	2	1	4	4	2
ALDH1A3	16	16	19	42	53	71	24	18	13	4	3	3	10	1	6	3	1	4	1	10	16	20	23	22	21	26	26	9	13	17	9	8	1	4	14	1	18	4	10	1	11	5	2	3	2	1	1	2	3
ALDH1B1	16	13	15	29	29	37	14	10	28	1	2	1	2	1	3	1	1	1	1	9	18	11	15	17	32	27	27	8	4	15	5	5	1	3	13	2	3	1	7	1	1	1	6	5	4	2	1	12	1
ALDH1L1	19	9	21	48	36	41	11	21	15	2	2	2	1	2	3	4	3	1	1	18	23	13	24	19	32	41	18	12	5	22	13	10	1	6	11	1	7	1	6	6	1	2	3	5	7	2	6	18	4
ALDH1L2	9	11	18	39	42	45	10	13	21	3	2	1	4	1	7	3	1	1	1	13	26	12	17	16	23	12	25	8	5	1	2	6	1	2	12	1	3	3	5	2	3	1	2	5	2	4	2	7	2
ALDH2	62	11	55	56	197	173	9	49	29	8	5	14	10	1	12	5	6	9	2	23	143	80	64	62	53	27	117	34	8	69	16	16	1	7	17	1	12	11	11	6	3	5	3	13	9	4	2	5	1
ALDH3A1	18	10	20	47	36	50	10	12	35	2	2	4	5	1	4	1	1	1	1	8	22	18	10	15	35	25	38	6	4	20	7	1	1	2	15	4	2	3	7	1	4	3	1	4	1	1	2	1	1
ALDH3A2	17	18	23	35	34	46	8	14	35	3	4	9	5	4	4	5	4	11	3	10	17	17	23	30	36	27	33	8	4	22	7	5	1	4	14	4	9	7	3	9	4	1	3	5	1	3	3	13	2
ALDH3B1	17	8	20	36	46	60	8	21	13	2	14	9	4	6	4	2	2	8	2	6	36	24	21	15	26	16	37	8	3	10	1	8	1	4	8	1	8	1	4	1	1	1	3	9	3	1	2	1	3
ALDH3B2	527	305	739	1180	1298	1644	266	568	512	10	11	18	22	9	11	10	9	26	11	76	234	337	270	293	179	139	425	121	29	135	79	34	1	48	76	40	85	36	31	37	22	19	32	55	22	10	19	28	5
ALDH4A1	10	11	11	33	30	35	4	9	27	1	3	1	6	1	3	1	3	2	1	11	18	18	16	21	30	33	32	7	7	10	5	2	1	1	7	2	7	1	5	3	1	1	2	4	3	3	3	5	5
ALDH5A1	6	8	10	24	21	24	9	15	15	1	2	3	2	2	2	1	1	3	1	10	16	12	18	16	31	17	20	4	8	5	4	2	1	2	12	3	5	3	1	2	2	1	1	4	4	1	6	6	3
ALDH6A1	10	7	11	28	19	24	10	10	21	1	3	1	9	1	7	1	5	2	1	7	12	9	16	19	24	15	20	6	2	8	3	4	1	2	10	1	3	2	8	4	3	1	5	5	3	2	2	6	1
ALDH7A1	11	15	11	40	40	50	9	20	21	3	1	6	6	1	3	5	1	2	2	11	9	14	11	15	35	18	21	10	11	12	5	9	1	4	9	1	7	5	7	1	1	1	1	4	4	2	4	3	2
ALDH8A1	11	18	17	23	23	44	8	14	20	1	1	4	1	1	1	1	1	1	2	14	13	15	15	28	33	18	31	4	3	12	4	1	1	2	10	1	8	2	4	1	3	2	5	2	3	2	3	9	1
ALDH9A1	28	15	48	39	84	92	13	33	31	1	17	12	8	6	1	3	1	6	11	13	39	13	24	18	39	33	45	29	10	44	18	9	1	4	14	2	10	11	7	15	4	2	1	13	2	2	5	8	5
ALDOA	183	69	283	633	512	758	34	252	162	44	148	256	38	103	19	19	10	249	133	109	480	254	218	184	46	37	413	323	40	366	145	223	1	38	109	3	72	85	92	165	33	72	14	105	31	16	69	228	32
ALDOB	22	14	43	46	101	116	13	37	39	1	6	13	1	3	2	1	1	12	7	12	30	32	17	26	40	26	52	9	5	51	15	4	1	7	6	1	3	2	2	5	2	3	5	5	4	3	1	5	1
ALDOC	11	9	22	45	48	61	11	17	18	1	2	1	4	1	4	2	2	2	1	16	30	16	19	15	35	29	42	10	3	8	8	4	1	4	6	3	4	1	6	3	2	1	1	4	3	2	1	6	2
ALG10	18	10	20	45	48	56	17	16	27	2	2	3	5	1	1	1	2	4	3	11	22	22	18	29	37	28	24	9	4	17	5	7	1	1	9	1	6	4	5	7	1	2	1	9	7	1	2	5	2
ALG10B	26	21	28	70	99	119	24	26	32	2	4	13	6	3	8	4	4	6	8	14	27	14	14	22	24	20	27	17	10	21	5	5	1	3	12	3	4	5	6	7	2	1	5	8	2	1	2	6	1
ALG12	69	26	86	127	169	147	26	53	39	5	6	5	4	5	8	3	2	8	3	17	31	42	35	27	37	39	48	10	13	16	10	10	1	3	5	1	7	9	9	8	5	1	6	5	4	2	2	2	3
ALG13	21	15	17	48	52	66	16	17	28	3	7	5	5	1	7	1	2	11	4	4	51	49	30	38	46	27	57	9	5	18	5	6	1	3	4	1	7	5	5	4	4	3	4	7	2	2	4	2	2
ALG14	17	10	15	30	68	86	12	18	22	2	2	1	6	1	5	6	1	1	1	13	16	20	11	23	33	21	36	8	5	8	5	2	1	2	11	1	4	3	7	4	2	3	2	4	2	2	1	3	4
ALG1L	21	7	18	57	50	60	14	19	35	2	6	5	1	2	7	1	1	4	4	10	18	12	11	17	33	29	25	15	9	9	8	5	1	3	9	2	6	6	2	8	4	1	2	6	2	3	2	2	3
ALG1L2	25	10	34	55	89	87	18	28	40	3	3	4	3	1	3	1	1	2	1	16	20	19	25	18	27	22	28	7	2	9	8	4	1	3	7	3	14	2	3	5	3	3	2	6	1	5	2	5	3
ALG2	18	11	28	40	57	82	11	25	18	5	7	4	5	3	3	1	1	5	1	13	21	24	15	27	25	22	34	11	4	15	8	2	1	3	8	4	4	12	13	5	8	5	1	4	3	2	2	12	3
ALG3	19	11	27	49	64	62	9	26	16	3	7	12	3	5	6	1	1	3	2	18	35	25	25	21	41	23	34	14	7	21	9	11	1	6	12	2	5	4	10	9	3	2	2	12	4	1	1	5	1
ALG5	32	23	41	65	113	123	14	54	36	4	4	4	3	1	6	3	1	9	5	21	47	35	45	22	19	23	61	12	5	31	10	9	1	3	8	2	7	9	7	10	3	1	2	8	1	3	2	6	5
ALG6	11	8	9	29	36	32	9	16	11	1	1	2	1	1	4	2	1	1	1	9	15	9	15	21	36	25	19	6	4	10	3	3	1	1	9	1	6	1	7	2	5	3	3	4	4	1	1	6	1
ALG8	8	10	15	35	36	46	9	15	13	2	1	3	3	2	3	1	1	3	1	8	9	12	12	8	20	17	15	5	3	9	7	6	1	2	8	1	3	4	2	6	1	4	3	2	3	3	1	1	1
ALG9	13	14	28	60	57	74	12	17	23	1	3	6	5	2	1	1	2	4	1	11	20	17	21	14	32	22	32	8	7	10	9	4	1	3	4	1	8	3	6	2	4	2	3	3	2	2	1	7	2
ALK	6	9	13	34	23	36	10	10	24	1	1	3	1	1	2	1	1	4	2	8	17	29	13	17	41	22	21	6	2	4	8	4	1	6	5	2	5	1	2	8	2	3	4	5	1	4	1	7	3
ALKAL1	14	8	14	32	27	46	8	11	19	3	3	1	1	1	2	1	1	3	1	4	14	12	17	16	27	26	34	4	2	11	2	7	1	3	41	1	2	1	1	6	3	1	1	5	2	1	2	8	1
ALKAL2	17	13	18	49	37	53	10	9	28	1	1	1	2	1	10	1	1	3	1	15	12	17	20	17	34	18	30	8	12	6	7	2	1	3	6	4	2	1	6	1	1	3	1	7	4	3	1	4	1
ALKBH1	8	9	8	31	28	44	8	13	14	1	1	2	3	1	1	1	1	1	3	6	20	13	10	14	19	15	28	7	3	9	5	1	1	5	5	3	8	2	5	7	1	1	2	5	1	2	2	7	1
ALKBH2	9	15	15	51	46	53	11	16	24	1	3	5	6	1	4	1	1	9	2	16	14	18	22	20	29	28	30	10	7	18	11	6	1	5	7	1	6	3	7	8	4	2	7	5	4	1	1	4	3
ALKBH3	14	11	29	44	48	39	5	19	16	4	3	5	4	1	3	1	1	3	1	6	19	14	19	16	22	14	29	5	6	11	5	5	1	3	8	2	8	2	9	1	7	1	3	9	2	2	3	5	1
ALKBH4	8	6	18	25	33	40	4	9	24	1	5	1	1	3	6	1	1	3	2	12	18	11	19	15	26	11	23	8	2	9	6	5	1	6	8	4	4	2	2	6	3	1	2	5	1	3	1	3	1
ALKBH5	15	19	24	63	36	46	11	17	35	1	6	9	6	6	4	4	2	15	3	28	33	23	26	27	28	21	38	12	3	25	6	8	1	5	14	1	16	3	9	7	6	3	3	6	5	2	1	11	6
ALKBH6	13	14	7	37	25	35	7	15	19	4	5	4	2	1	2	2	1	7	3	6	17	8	16	22	20	19	17	8	3	16	4	6	1	1	8	1	5	3	5	1	3	1	1	1	3	1	2	6	4
ALKBH7	20	19	21	44	56	63	8	12	14	1	4	6	5	1	4	3	4	3	3	20	52	33	27	22	25	17	43	26	5	35	14	6	1	2	12	2	10	11	4	6	1	6	2	16	2	1	3	10	2
ALKBH8	14	14	23	49	48	59	9	13	19	1	3	3	2	1	6	1	1	4	1	7	18	19	17	17	37	26	27	8	10	13	6	9	1	2	10	1	7	4	8	4	1	6	1	3	2	3	1	7	1
ALLC	9	11	17	22	29	37	8	6	19	1	2	3	4	1	4	1	2	2	1	5	14	14	18	18	26	18	21	9	3	6	4	3	1	5	5	3	5	1	2	5	1	4	2	1	3	4	3	7	2
ALMS1	15	21	25	78	47	68	11	15	34	1	5	4	8	1	5	2	3	6	2	17	28	21	28	25	44	29	40	12	9	22	10	6	1	6	14	1	8	5	14	4	4	5	2	6	8	3	2	4	5
ALOX12	11	11	12	27	28	43	13	10	20	3	1	1	2	1	3	1	1	1	2	12	21	19	23	29	26	22	24	5	4	8	7	2	1	5	10	2	3	4	7	3	4	2	1	3	2	4	1	6	1
ALOX12B	15	12	10	32	30	27	8	7	25	1	2	1	1	2	3	3	1	6	1	10	16	13	13	24	31	19	24	6	7	6	9	1	1	4	6	2	3	1	5	1	3	3	5	3	1	4	3	9	1
ALOX15	15	19	29	36	60	79	17	27	28	1	4	1	4	1	4	2	1	2	1	9	21	19	22	21	35	22	35	4	3	12	7	2	1	2	9	4	6	1	7	6	2	3	1	2	4	1	1	4	3
ALOX15B	15	7	23	34	33	46	8	19	15	3	1	1	3	1	4	1	1	2	2	5	10	9	11	11	23	18	24	7	8	8	7	1	1	2	3	1	6	1	1	1	1	1	3	3	5	2	3	9	1
ALOX5	34	12	23	33	83	120	11	40	17	10	13	32	9	7	8	5	3	17	6	13	12	14	17	21	34	18	28	46	7	67	32	32	1	6	22	1	17	29	2	20	7	23	4	52	8	3	1	5	3
ALOX5AP	22	33	26	84	62	92	21	23	67	18	4	5	8	1	10	6	4	5	7	9	16	10	17	19	35	23	29	9	6	20	2	6	1	9	6	1	12	5	25	7	8	4	2	10	1	8	1	10	1
ALOXE3	14	11	8	31	20	40	6	11	17	1	1	2	3	1	2	3	2	3	1	9	13	12	17	25	17	31	34	6	6	15	9	3	1	3	5	2	5	1	9	1	1	3	1	4	3	2	2	6	1
ALPG	10	6	8	18	25	35	7	27	7	1	3	2	2	1	2	1	1	1	1	6	15	10	13	16	11	17	11	5	5	5	2	2	1	1	9	2	4	2	2	1	1	1	2	3	2	2	1	7	2
ALPI	11	4	14	31	25	46	9	16	26	1	1	2	5	1	5	1	1	1	2	4	29	20	12	20	25	19	20	15	7	12	7	4	1	4	4	2	3	1	7	2	4	1	3	1	4	3	2	6	2
ALPK1	7	7	10	23	20	22	16	6	17	2	1	3	5	1	4	3	3	5	1	4	18	11	11	13	18	18	22	5	6	10	2	3	1	2	5	1	1	2	1	4	1	2	2	1	3	1	2	5	1
ALPK2	11	11	14	34	39	52	14	13	17	3	1	1	2	1	6	1	1	2	1	10	18	12	16	21	39	34	30	7	4	7	8	4	1	3	6	1	9	1	4	4	1	1	2	5	3	4	5	10	1
ALPK3	21	10	17	37	39	42	11	17	21	2	6	7	4	4	2	1	1	7	6	11	14	19	15	19	24	33	22	8	5	8	5	8	1	1	7	1	4	1	5	3	2	1	5	7	1	4	1	9	1
ALPL	15	13	21	41	43	54	11	15	22	5	2	2	2	1	4	3	1	6	2	9	22	19	17	20	35	23	26	12	4	11	9	5	1	2	10	1	12	11	2	9	5	1	2	5	6	4	4	6	1
ALPP	14	12	19	43	41	52	11	8	21	1	1	3	1	1	8	1	1	2	1	13	9	15	21	16	19	21	29	7	6	8	4	3	1	3	10	1	6	1	5	2	1	1	1	5	5	1	2	5	1
ALS2	19	8	20	43	51	61	14	19	28	1	2	6	9	5	2	1	1	4	2	11	30	30	15	25	28	24	41	10	5	17	11	6	1	4	9	4	7	4	11	6	2	5	2	4	1	4	3	9	3
ALS2CL	27	8	29	30	69	79	9	28	23	2	8	20	3	10	3	1	1	18	5	9	38	42	30	36	35	20	49	17	6	79	21	27	1	5	15	6	9	13	7	27	3	13	2	53	3	3	4	7	2
ALX1	6	4	19	25	18	37	6	8	8	1	2	1	1	1	1	1	1	3	1	3	14	12	6	15	12	14	17	4	3	3	5	3	1	1	6	1	1	2	3	1	1	2	1	3	1	3	1	7	1
ALX3	15	12	32	37	43	56	10	24	32	1	1	3	2	1	5	2	2	1	2	15	15	12	19	18	35	23	23	9	4	6	4	2	1	3	10	3	11	3	7	1	4	2	6	4	1	1	6	7	2
ALX4	13	12	23	30	52	52	9	15	27	3	1	1	5	1	2	1	1	2	1	9	11	12	11	20	21	16	22	7	2	7	4	3	1	4	6	1	3	2	3	3	1	2	2	3	1	1	3	8	1
ALYREF	33	14	35	71	78	102	10	32	27	8	15	14	4	5	7	3	3	16	4	14	40	43	29	31	37	40	41	16	15	32	11	14	1	4	10	2	5	6	13	13	3	6	1	8	4	2	4	4	4
AMACR	23	13	40	52	64	103	6	30	21	2	5	3	2	1	7	1	1	4	1	13	18	19	15	21	24	20	22	15	6	14	7	4	1	3	18	1	8	3	2	1	4	4	2	5	1	1	1	7	4
AMBN	13	9	13	43	28	38	9	11	15	1	1	2	1	1	5	1	2	3	2	9	20	12	10	19	28	21	23	11	4	7	5	1	1	7	6	3	6	3	2	2	1	1	2	5	1	1	2	7	1
AMBP	15	9	10	27	38	32	9	9	11	1	1	2	1	2	4	1	1	1	1	12	20	6	17	21	36	22	28	4	3	8	2	5	1	2	6	1	6	1	3	2	1	1	1	3	4	1	2	4	2
AMBRA1	10	6	14	31	31	48	4	17	13	1	5	6	1	1	7	1	1	5	6	11	26	23	14	19	29	17	22	6	9	17	6	10	1	6	5	1	9	6	8	5	2	1	2	4	4	2	1	5	1
AMD1	16	7	13	39	39	39	13	23	27	3	6	3	8	3	8	7	4	9	2	10	17	25	24	27	28	21	22	18	3	31	7	5	1	4	5	1	11	7	16	14	8	5	6	9	1	3	3	3	1
AMDHD1	7	15	19	44	35	38	10	12	19	1	2	4	5	1	6	1	1	2	1	13	10	25	11	19	33	18	23	8	7	6	6	3	1	1	2	1	5	1	2	3	1	1	4	3	1	1	3	2	1
AMDHD2	11	10	17	38	40	41	9	11	28	4	3	6	3	3	6	4	1	7	5	7	26	13	24	23	26	21	29	10	5	16	7	6	1	5	10	2	12	5	3	7	1	4	1	7	2	2	2	3	7
AMELX	18	23	37	71	57	80	18	26	43	2	2	4	2	1	3	1	1	1	1	15	19	21	22	25	35	18	36	14	4	10	6	3	1	1	8	1	16	3	8	4	2	1	3	4	2	2	3	3	2
AMELY	6	13	20	39	48	47	13	7	18	1	1	2	5	1	1	2	1	1	1	11	16	22	19	24	30	20	29	9	5	8	3	2	1	1	17	2	5	1	3	2	4	2	4	6	3	1	2	8	5
AMER1	5	5	11	25	17	29	9	3	15	2	1	1	1	1	1	2	1	3	1	8	11	19	15	18	29	25	16	2	3	5	5	3	1	1	9	2	1	3	1	1	2	2	5	3	2	3	2	3	2
AMER2	18	11	23	39	35	33	11	13	17	1	1	2	1	1	1	1	1	3	1	8	19	14	14	23	32	23	34	5	8	12	7	5	1	4	11	2	7	3	3	1	1	1	1	3	1	2	2	9	1
AMER3	10	6	15	38	23	37	11	14	22	1	1	3	2	1	4	1	1	2	1	12	13	15	17	18	26	26	18	3	4	4	5	3	1	3	7	1	10	1	1	3	2	2	4	5	2	2	2	3	1
AMFR	29	17	22	72	57	70	17	27	47	5	5	10	13	5	5	5	4	4	4	18	42	32	45	30	26	25	41	23	14	60	12	7	1	5	13	1	9	15	18	12	4	3	1	5	4	5	1	6	4
AMH	34	19	42	62	96	115	24	36	30	5	1	1	4	1	6	1	1	4	1	10	28	31	34	21	38	24	44	12	6	15	14	4	1	2	10	3	10	1	5	6	2	1	4	7	2	2	1	4	3
AMHR2	14	10	21	38	48	37	9	13	23	2	3	5	3	1	2	2	1	3	3	11	9	14	15	26	21	19	25	4	6	6	8	4	1	2	8	2	6	2	5	4	3	2	1	1	4	2	1	6	1
AMIGO1	15	10	17	43	34	48	9	9	23	2	1	2	4	1	5	1	2	2	2	9	18	10	13	16	31	17	22	5	7	8	4	5	1	1	11	1	6	4	2	2	1	2	1	6	1	1	2	8	1
AMIGO2	11	10	15	41	44	61	7	19	12	3	30	64	3	21	6	1	1	140	68	10	19	24	24	37	23	15	23	11	5	13	6	34	1	3	5	1	3	5	2	5	1	16	3	20	1	5	6	7	1
AMIGO3	23	17	20	43	39	49	7	11	30	2	5	1	2	1	4	2	2	1	1	13	27	15	16	7	27	15	18	5	7	17	7	2	1	2	6	2	5	5	4	2	1	2	1	6	3	3	1	4	1
AMMECR1	13	10	16	32	36	60	12	17	26	4	4	8	4	4	5	2	1	4	3	14	19	15	16	26	25	20	21	7	2	14	3	7	1	4	9	1	5	3	5	4	1	5	2	2	1	1	2	9	1
AMMECR1L	13	9	24	40	36	70	10	18	24	5	6	5	2	4	12	3	10	6	1	19	30	28	30	25	33	26	42	15	4	28	9	14	1	6	10	1	11	6	6	6	4	7	7	3	6	6	1	6	1
AMN	11	6	12	33	28	49	9	14	18	4	6	5	1	2	4	1	1	1	1	7	20	16	16	11	22	13	23	9	3	13	1	5	1	4	7	1	5	3	2	1	2	1	1	4	4	2	1	3	4
AMN1	15	17	27	55	54	60	9	16	17	1	1	1	1	1	3	3	1	3	1	6	15	13	15	13	31	23	20	6	7	14	2	1	1	5	4	1	6	1	5	8	6	2	3	5	2	2	2	10	6
AMOT	9	16	11	39	32	53	16	15	23	1	3	3	1	3	2	2	1	5	6	12	18	18	21	22	34	37	33	7	7	7	5	3	1	3	11	3	7	3	4	2	3	2	2	7	2	2	1	5	2
AMOTL1	7	13	11	53	28	41	10	7	27	7	3	3	5	2	7	2	2	4	3	10	10	11	16	10	26	17	22	6	7	6	5	9	1	3	3	1	13	1	26	1	5	1	3	3	11	2	2	10	2
AMOTL2	21	10	10	28	36	42	8	10	17	3	1	7	6	3	2	1	1	5	2	10	22	18	23	14	31	15	33	14	10	8	6	7	1	9	13	1	3	2	7	13	2	10	1	4	2	4	3	11	2
AMPD1	20	13	26	41	38	52	8	11	17	1	2	1	3	3	5	1	1	2	1	9	25	36	20	37	37	27	30	8	9	10	6	10	1	2	13	1	12	2	4	1	1	1	1	1	1	2	5	2	1
AMPD2	18	11	20	63	44	55	18	18	23	10	4	5	11	3	12	5	6	5	1	19	37	24	33	29	42	32	41	16	9	41	9	11	1	4	21	4	14	11	13	7	5	5	1	7	9	3	4	3	2
AMPD3	13	5	25	37	30	56	12	18	21	2	2	3	2	1	4	2	1	1	1	7	8	19	16	11	30	23	38	6	4	7	2	3	1	3	7	4	4	3	7	2	1	2	3	8	1	1	3	6	2
AMPH	13	6	22	38	40	48	11	21	18	1	1	2	2	1	8	1	1	1	1	11	13	20	13	18	43	29	29	5	3	10	7	2	1	3	9	3	9	3	5	1	1	1	2	2	2	1	1	13	1
AMT	9	13	8	28	29	29	8	12	25	1	2	2	3	1	1	1	1	2	2	5	18	18	10	25	29	20	23	5	2	11	5	5	1	2	10	4	5	6	5	1	2	2	2	8	1	4	5	6	2
AMTN	20	16	16	34	40	45	5	12	20	1	1	1	4	2	2	1	1	1	1	10	19	12	17	20	28	22	30	6	3	12	1	1	1	3	5	1	3	2	6	3	3	1	6	1	1	1	1	8	1
AMY1A	7	17	24	39	35	42	14	11	23	5	5	7	7	1	8	2	3	3	1	13	32	29	28	25	37	31	47	5	14	20	11	4	1	5	10	4	10	5	9	4	3	1	3	6	3	1	4	8	1
AMY2B	9	11	12	35	32	34	7	7	17	3	1	3	1	1	3	1	1	4	2	13	18	11	19	21	32	20	36	6	5	13	6	5	1	4	12	1	5	1	3	4	3	4	4	8	1	1	4	13	5
AMZ1	14	13	13	32	46	61	14	18	26	1	1	1	2	1	3	1	2	1	1	12	21	18	28	19	18	23	25	9	3	9	8	4	1	4	3	1	4	1	6	5	5	2	1	6	1	3	1	6	2
AMZ2	21	13	26	84	65	78	14	29	42	8	10	13	12	4	9	10	4	20	15	20	27	25	39	40	28	35	45	14	12	26	11	9	1	8	12	5	13	1	15	7	6	6	7	12	8	1	6	1	8
ANAPC1	9	11	11	36	37	50	10	10	31	4	6	3	2	1	3	1	1	2	2	8	30	9	20	16	27	18	27	8	2	13	6	3	1	2	19	1	3	2	5	4	2	2	3	10	2	5	3	6	1
ANAPC10	7	10	16	47	35	41	5	7	27	1	6	3	1	1	3	1	1	2	1	7	19	35	25	21	44	28	33	13	4	18	4	2	1	2	16	4	10	3	4	7	3	3	2	10	4	1	1	15	3
ANAPC11	32	14	44	63	81	91	17	27	27	5	12	10	3	10	2	1	1	17	3	18	30	29	39	19	26	31	43	13	6	29	10	10	1	6	7	1	3	2	9	2	3	5	1	3	2	2	7	9	3
ANAPC13	17	20	36	62	64	75	17	23	36	5	16	13	10	1	8	3	3	16	6	29	40	25	18	29	30	30	47	22	3	38	16	22	1	8	12	1	6	9	9	15	5	3	7	5	5	2	2	9	6
ANAPC15	20	14	34	71	77	73	16	28	22	2	5	5	3	3	8	1	3	8	2	10	28	27	15	17	21	27	44	16	11	22	5	10	1	4	18	1	7	4	9	11	2	3	2	12	4	3	4	6	1
ANAPC16	23	15	28	81	59	71	5	29	30	8	9	5	6	3	7	4	1	10	10	14	56	34	36	36	21	22	47	33	11	57	23	20	1	5	23	1	7	13	7	18	6	9	4	23	3	3	1	3	1
ANAPC2	25	9	21	50	56	48	11	24	22	4	2	5	3	1	5	1	1	4	2	12	19	26	16	20	28	25	32	39	6	24	7	4	1	1	12	3	7	6	4	2	2	2	1	7	1	1	1	5	1
ANAPC4	11	6	10	40	30	36	4	11	13	5	1	4	5	1	5	5	1	2	1	7	18	16	8	11	15	16	20	3	1	18	4	5	1	2	9	1	9	2	4	4	2	4	3	8	1	1	7	6	1
ANAPC5	23	17	26	51	54	75	15	21	35	7	11	9	16	6	3	4	4	10	6	17	30	29	28	29	41	27	45	21	8	46	7	8	1	8	14	1	12	12	14	15	10	7	5	5	5	2	2	15	2
ANAPC7	28	19	38	67	84	60	23	16	30	4	12	10	10	9	4	1	2	8	8	19	61	37	43	34	33	33	71	30	11	60	12	7	1	11	24	1	13	16	16	14	9	9	4	14	7	4	2	5	1
ANG	22	15	24	54	46	52	13	22	29	7	8	6	6	4	15	1	1	3	4	14	48	18	32	27	43	29	54	21	2	28	18	2	1	3	17	2	11	2	6	6	3	5	6	9	3	1	4	11	1
ANGEL1	10	15	23	56	60	72	12	23	20	3	5	1	3	1	2	1	1	4	1	12	6	13	16	22	21	16	31	6	7	13	6	1	1	7	4	2	3	5	7	1	4	2	2	8	3	3	1	3	1
ANGEL2	14	14	19	26	32	48	11	13	16	1	2	3	2	1	1	3	1	1	1	5	14	8	16	12	19	15	16	6	4	17	3	1	1	2	8	1	9	4	6	5	2	1	1	5	1	4	2	2	1
ANGPT1	3	5	7	8	16	10	4	4	7	1	1	1	1	1	2	1	2	1	1	8	16	14	17	18	25	17	17	4	3	7	5	2	1	2	7	1	7	3	6	2	2	2	2	2	5	1	1	6	1
ANGPT2	7	12	5	19	28	17	2	8	21	1	2	2	2	1	1	3	1	1	1	9	19	9	11	19	25	8	27	4	3	4	3	1	1	2	3	1	3	1	5	1	4	1	1	2	2	2	3	6	2
ANGPT4	9	7	9	27	26	20	7	9	21	1	1	3	2	1	1	1	1	1	1	9	14	16	7	12	23	20	36	5	3	9	2	3	1	3	17	2	3	3	1	2	1	1	3	6	1	2	2	6	3
ANGPTL1	18	10	19	36	28	37	12	11	14	2	1	1	3	2	2	2	2	1	4	5	14	13	21	14	26	18	28	3	5	6	4	5	1	1	6	1	5	1	5	1	2	1	3	4	1	2	1	13	2
ANGPTL2	12	14	10	36	33	45	12	7	29	1	2	1	2	1	5	1	1	4	1	33	17	12	10	21	28	11	24	4	10	13	3	2	1	1	61	1	11	1	7	3	1	2	1	5	6	1	2	6	3
ANGPTL3	13	9	9	28	24	48	8	10	21	3	1	1	4	1	2	1	1	1	2	9	17	13	12	17	28	18	21	9	4	4	3	3	1	2	6	1	5	1	3	1	3	2	6	2	3	6	4	5	1
ANGPTL4	8	11	16	26	32	71	16	12	20	5	2	43	40	18	32	22	20	43	20	8	15	12	19	19	22	25	26	7	4	9	8	16	1	3	8	1	3	2	29	6	11	4	6	5	1	10	1	5	2
ANGPTL5	12	7	11	32	28	39	8	10	16	1	2	1	1	1	4	1	2	2	1	10	16	18	13	17	34	24	23	4	2	8	4	4	1	1	7	1	4	1	4	2	1	1	3	3	1	1	2	6	4
ANGPTL6	19	21	28	83	56	85	19	20	29	2	1	2	3	1	4	1	1	2	1	10	27	19	27	26	48	30	44	16	1	11	4	3	1	1	23	1	6	4	3	6	3	2	2	3	2	1	1	7	3
ANGPTL7	11	8	4	28	26	22	25	9	14	6	1	1	35	1	17	21	14	1	1	32	13	13	14	15	36	26	23	4	29	4	5	4	1	2	9	3	25	2	6	5	3	1	14	3	18	3	1	1	1
ANGPTL8	8	10	11	35	41	44	13	8	27	1	1	2	3	1	4	1	1	2	1	14	15	13	12	22	21	14	20	6	4	7	7	4	1	1	5	2	4	2	1	1	2	5	1	5	3	1	4	7	1
ANHX	14	13	17	36	48	47	12	12	23	1	1	2	2	1	6	1	1	1	1	7	20	19	16	18	21	19	27	4	4	9	9	2	1	2	6	5	6	3	5	1	4	1	2	8	1	1	2	9	1
ANK1	10	10	18	42	29	48	11	19	26	3	4	1	14	1	5	1	1	1	1	8	16	11	14	24	42	26	28	5	11	8	5	5	1	2	8	2	9	3	3	1	2	1	3	2	2	2	1	9	2
ANK2	12	12	18	46	39	51	11	19	35	4	2	2	15	1	10	5	2	3	1	14	13	20	12	19	36	29	25	6	10	11	2	5	1	6	9	1	13	1	9	6	2	1	5	7	3	5	3	4	1
ANK3	17	22	20	69	47	66	11	13	39	11	2	5	25	1	21	19	13	5	3	49	28	27	26	34	53	57	37	40	22	38	16	6	1	14	10	1	28	11	13	8	8	2	5	7	17	1	2	1	1
ANKAR	11	7	13	29	28	45	12	15	18	2	5	1	6	1	7	1	1	2	3	10	21	20	25	21	36	13	24	9	1	18	3	2	1	3	12	3	9	1	3	3	2	1	3	5	1	1	6	11	2
ANKDD1A	13	19	15	50	43	51	7	13	26	4	3	3	4	2	9	2	1	1	1	10	20	13	22	22	28	27	20	5	7	5	6	5	1	1	8	2	4	2	5	4	1	1	2	4	6	3	1	7	4
ANKDD1B	15	7	18	46	34	50	10	11	22	1	2	2	5	1	5	1	1	1	1	11	21	14	19	22	30	30	23	8	6	13	11	3	1	1	6	1	4	5	3	1	2	3	1	9	2	2	2	3	1
ANKEF1	8	12	17	30	32	45	9	6	23	1	1	2	1	1	2	1	1	5	1	9	17	17	16	12	25	26	29	8	7	6	4	4	1	1	12	1	2	3	4	1	4	1	1	6	4	1	3	11	1
ANKFN1	6	14	15	39	33	43	5	6	13	1	2	1	3	1	7	1	1	1	1	13	15	12	14	19	31	25	23	4	4	7	2	2	1	3	5	1	7	1	4	1	1	1	1	4	1	1	8	4	1
ANKFY1	9	13	10	34	33	38	4	13	16	2	4	7	4	1	4	1	2	2	3	12	15	13	22	19	30	27	30	9	3	22	8	2	1	4	9	1	4	2	9	5	2	1	1	2	2	2	1	3	2
ANKH	118	59	153	276	323	342	60	128	113	4	3	12	19	2	13	5	3	9	5	31	62	42	47	38	38	29	60	32	23	48	11	10	1	13	51	2	25	10	36	10	19	15	14	10	6	6	3	6	6
ANKHD1	20	13	29	39	51	77	14	20	24	2	11	14	10	2	7	4	2	6	2	16	31	42	27	43	24	27	34	25	8	66	17	7	1	3	16	1	15	15	6	7	4	8	5	14	3	4	2	8	3
ANKIB1	7	10	14	40	48	43	7	16	25	4	11	8	5	3	4	1	1	5	1	10	26	19	22	21	21	23	31	12	5	27	10	11	1	1	6	1	9	6	1	12	2	3	4	10	1	1	2	4	5
ANKK1	9	16	14	26	17	37	5	8	17	1	1	2	2	1	4	1	1	2	1	8	12	15	14	16	24	26	20	4	5	6	4	2	1	3	4	1	6	1	1	7	1	4	1	6	1	2	3	4	1
ANKLE1	11	16	21	49	51	69	16	17	36	1	1	1	2	1	8	3	1	2	1	15	30	19	19	25	34	26	30	12	2	9	6	2	1	2	11	2	8	2	4	3	1	3	2	8	1	2	1	6	2
ANKLE2	15	14	22	36	66	65	10	24	33	12	26	67	11	35	8	4	9	68	23	17	63	56	70	66	44	36	63	38	18	110	19	36	1	5	12	1	12	24	27	87	16	46	3	18	5	8	5	11	5
ANKMY1	19	17	15	37	72	47	16	26	26	3	13	14	9	10	1	1	3	14	2	8	26	26	25	17	35	11	34	16	7	28	18	6	1	4	18	1	8	16	7	9	3	4	1	18	2	1	2	2	1
ANKMY2	10	12	21	32	44	55	9	15	26	3	1	3	6	4	4	2	1	7	2	7	13	14	21	30	37	19	31	12	1	12	11	7	1	4	8	1	1	6	2	3	1	4	3	6	2	2	2	4	2
ANKRA2	18	16	29	40	47	57	14	10	26	5	3	6	5	3	3	4	1	6	3	9	23	11	20	26	29	26	26	17	4	36	4	9	1	6	13	2	9	4	5	4	6	5	3	8	3	2	1	6	3
ANKRD1	9	9	10	22	57	47	4	7	17	1	1	3	1	2	4	1	1	2	2	6	13	10	15	20	30	25	13	5	3	5	5	5	1	1	5	3	5	1	4	2	1	1	2	5	1	1	2	4	3
ANKRD10	66	38	114	81	313	659	19	78	59	33	41	89	26	41	18	15	4	74	40	61	113	69	71	57	61	45	135	79	26	186	46	44	1	31	47	1	44	35	31	63	14	46	2	44	15	9	8	6	8
ANKRD11	31	17	30	47	67	69	13	14	18	9	9	4	15	4	13	5	3	9	5	19	32	34	27	40	26	31	36	20	14	49	11	8	1	2	17	2	13	15	21	24	6	16	3	8	10	5	1	5	3
ANKRD12	20	14	16	52	33	64	8	17	30	6	13	22	5	4	7	6	3	15	1	21	37	34	25	38	45	33	57	14	13	33	7	12	1	5	9	3	13	9	7	8	6	6	3	10	10	1	2	8	1
ANKRD13A	9	12	9	31	31	41	10	10	16	2	1	2	8	2	1	2	2	2	5	9	19	14	11	20	31	17	27	4	9	18	6	4	1	1	11	1	1	9	6	6	5	3	1	8	3	6	1	11	1
ANKRD13B	12	13	13	27	26	35	7	14	15	1	3	1	1	1	6	1	1	1	1	7	7	13	12	14	30	29	26	4	5	9	3	2	1	6	8	2	5	2	5	3	1	2	2	2	3	2	4	9	3
ANKRD13C	12	17	13	57	50	78	13	17	41	4	6	10	10	1	8	2	4	4	2	16	38	33	32	24	37	28	48	28	10	32	5	8	1	7	10	2	14	8	15	6	8	1	4	9	2	2	1	3	1
ANKRD13D	171	81	164	232	346	382	44	175	160	11	6	20	7	1	12	5	3	13	8	26	85	70	49	49	44	32	87	26	19	53	22	17	1	8	29	3	22	12	14	19	7	13	5	25	7	1	2	9	1
ANKRD16	11	17	21	35	26	53	7	8	25	3	2	4	1	5	6	2	1	1	3	15	19	15	21	18	38	22	23	11	3	10	7	2	1	5	10	3	5	3	8	5	1	4	4	4	1	1	2	1	1
ANKRD17	20	19	32	61	76	63	12	18	35	7	8	6	12	4	9	7	2	6	7	11	37	29	30	22	41	26	50	25	11	50	11	6	1	14	16	1	13	15	11	16	13	4	2	12	4	7	6	5	1
ANKRD18A	10	8	9	17	40	27	8	13	26	3	1	1	3	1	4	1	1	1	1	6	13	16	18	11	22	29	12	6	8	8	2	2	1	1	6	1	2	1	1	1	1	1	1	3	1	1	4	5	1
ANKRD18B	10	4	10	26	24	38	2	9	16	1	1	1	4	1	4	1	1	1	1	9	13	14	11	21	18	11	19	4	1	5	3	1	1	4	9	2	3	2	4	2	3	3	2	2	1	2	1	4	1
ANKRD2	59	22	69	106	138	174	26	44	48	3	6	3	5	1	2	3	1	4	1	19	62	47	43	59	48	39	62	14	4	12	15	12	1	7	14	2	9	2	6	5	4	5	5	11	2	1	3	7	3
ANKRD20A1	121	76	139	241	298	430	86	102	115	2	9	9	2	4	6	6	2	11	5	35	105	83	85	77	69	44	131	30	11	31	28	16	1	8	21	5	12	8	7	11	12	12	7	18	9	6	3	8	2
ANKRD22	12	5	16	39	54	38	12	6	20	2	1	1	4	2	7	1	1	1	5	8	19	16	16	11	32	24	31	13	3	9	4	2	1	2	6	1	11	1	2	2	1	1	2	2	1	1	1	4	2
ANKRD23	7	9	15	29	25	25	8	5	19	1	2	3	3	1	5	1	1	3	1	8	16	10	24	16	25	22	34	6	4	7	5	3	1	2	6	2	8	7	4	3	3	1	4	3	1	3	2	5	2
ANKRD24	8	11	9	30	23	21	4	8	12	2	1	1	1	2	1	1	1	1	1	7	13	10	15	9	22	17	17	5	2	10	1	2	1	2	4	1	1	1	2	2	1	1	1	2	2	2	2	7	2
ANKRD26	4	6	4	20	14	11	5	9	5	1	1	1	3	1	2	1	1	2	1	5	3	6	6	9	12	5	6	1	1	6	4	4	1	4	9	1	3	1	3	2	1	2	1	1	2	3	1	4	1
ANKRD27	13	7	17	48	30	55	11	12	22	1	7	8	9	3	14	3	4	14	5	7	21	18	23	19	33	18	36	12	4	16	2	5	1	3	13	2	12	3	7	9	6	9	1	14	6	4	3	9	1
ANKRD28	13	9	16	49	40	41	9	9	34	1	3	3	4	2	4	3	1	1	1	15	23	33	25	25	36	30	32	9	4	21	5	4	1	3	11	1	13	6	9	8	7	5	1	9	6	3	5	6	4
ANKRD29	10	6	17	25	24	28	7	4	11	1	1	3	3	1	3	1	2	2	1	1	14	13	6	22	26	26	19	2	2	5	3	4	1	2	2	1	3	1	5	1	1	2	4	4	1	6	4	5	2
ANKRD30A	19	12	18	32	42	36	7	14	25	1	2	1	6	1	7	1	1	1	2	10	21	16	10	18	21	23	24	11	7	10	9	1	1	2	10	1	3	4	5	3	1	1	1	3	1	1	3	1	2
ANKRD30B	4	7	8	13	19	29	4	5	11	1	1	1	1	1	5	1	3	1	2	6	12	14	21	19	17	13	24	5	3	4	3	1	1	3	4	2	3	1	2	2	5	1	2	4	1	2	3	8	2
ANKRD30BL	23	18	34	37	42	49	21	19	21	2	3	1	5	1	1	2	2	1	1	11	12	23	25	26	44	21	35	15	14	12	11	3	1	4	10	1	2	5	7	3	2	2	6	2	2	1	4	11	1
ANKRD31	7	12	12	20	22	22	2	3	13	2	2	1	2	1	1	1	2	1	2	4	16	10	19	9	32	20	23	8	5	5	7	2	1	1	3	1	3	2	2	3	2	1	3	4	1	1	1	4	1
ANKRD33	14	12	17	44	36	49	10	13	23	1	1	1	3	1	3	1	1	1	1	11	25	14	15	14	48	28	26	7	3	10	5	3	1	3	14	3	4	2	4	1	2	1	1	4	4	3	2	5	1
ANKRD33B	16	10	15	34	35	32	9	6	21	6	1	3	7	1	5	1	3	3	1	10	8	15	23	13	32	20	32	5	2	5	4	5	1	2	13	3	3	2	3	1	2	2	6	6	4	1	2	1	1
ANKRD34A	11	11	21	43	96	61	10	9	21	1	1	2	2	1	3	1	2	1	1	9	16	9	11	11	26	18	18	5	8	10	4	1	1	2	16	1	5	1	5	5	2	1	1	6	5	1	1	3	1
ANKRD34B	10	9	12	49	41	56	9	10	32	1	1	3	1	1	4	1	1	5	1	8	25	15	25	29	31	22	23	10	2	9	4	5	1	2	5	3	4	5	5	2	3	1	3	4	3	1	3	12	1
ANKRD34C	5	9	15	34	115	41	7	9	22	3	1	4	7	2	4	2	2	3	1	8	11	18	11	20	42	26	26	8	5	7	9	3	1	3	8	4	2	2	5	4	4	1	1	4	3	1	3	7	1
ANKRD35	12	12	14	37	56	43	14	21	28	1	1	5	4	1	2	1	1	1	1	6	12	18	18	12	28	21	20	4	2	4	3	3	1	5	7	4	4	4	2	2	3	1	1	5	2	3	2	4	1
ANKRD36	205	120	210	349	420	647	97	229	195	13	10	32	16	8	6	12	5	26	14	37	90	64	63	60	67	61	94	42	24	64	27	8	1	13	30	6	27	22	12	24	8	13	6	25	8	6	6	12	3
ANKRD36B	1262	684	1217	1845	2818	3949	534	1177	1186	56	114	161	100	56	52	31	23	190	106	228	664	547	516	492	282	261	742	355	104	539	236	142	1	88	160	43	163	165	101	175	55	113	58	159	52	20	37	47	18
ANKRD36C	21	9	27	34	114	113	5	20	20	2	13	22	1	8	3	1	2	18	5	8	26	22	46	52	24	13	29	26	6	75	29	27	1	9	14	1	9	15	7	6	3	8	1	21	3	3	4	3	1
ANKRD37	18	10	16	38	38	65	7	13	23	3	1	2	4	4	5	9	2	2	3	12	17	16	11	21	27	30	30	14	7	10	7	3	1	5	11	1	9	2	2	2	5	1	1	3	2	2	1	5	1
ANKRD39	24	14	30	54	64	59	16	21	22	1	3	7	6	1	5	1	5	4	2	14	36	27	27	22	30	22	39	17	6	21	7	9	1	10	6	1	9	4	8	6	5	5	2	8	2	4	1	4	1
ANKRD40	9	12	24	43	29	34	17	15	25	3	6	3	3	2	4	3	2	6	1	10	9	15	21	13	29	22	15	8	6	12	6	3	1	5	8	1	6	5	6	3	2	2	1	1	4	1	1	5	2
ANKRD40CL	13	8	18	36	55	43	14	21	23	2	12	13	3	1	3	1	1	2	1	10	20	14	22	20	28	18	26	7	4	16	7	7	1	4	13	1	4	3	1	5	2	3	1	2	7	2	1	4	1
ANKRD42	9	12	10	28	26	29	5	6	13	1	3	2	2	1	4	1	1	1	2	4	10	11	13	16	23	8	25	6	1	5	5	3	1	2	10	1	4	4	2	6	1	2	3	3	1	2	1	10	1
ANKRD44	11	19	12	37	49	36	13	19	24	3	2	3	4	1	7	4	2	5	1	11	25	19	19	20	35	24	26	12	5	14	11	3	1	3	8	3	13	1	6	6	2	4	3	7	4	1	2	6	1
ANKRD45	19	8	17	33	47	43	9	15	15	2	3	1	2	1	7	2	1	1	1	9	9	13	10	14	19	10	27	7	8	5	2	5	1	1	4	2	4	1	5	2	1	1	1	3	1	3	1	3	1
ANKRD46	11	13	12	24	31	27	6	10	14	2	1	1	5	1	2	1	1	1	1	11	18	15	14	16	23	27	24	13	6	13	8	4	1	3	5	1	6	2	4	5	1	5	4	3	4	3	1	4	2
ANKRD49	17	11	21	32	60	51	9	15	14	2	1	4	6	3	6	1	1	1	1	11	35	15	23	16	32	24	33	10	6	12	7	1	1	3	3	1	11	6	1	4	2	1	1	8	4	1	1	3	7
ANKRD50	11	8	17	36	24	51	10	10	17	6	1	8	6	1	4	1	2	8	4	5	21	19	11	19	30	20	20	13	3	17	4	6	1	5	31	1	6	3	8	5	1	3	3	6	3	3	5	3	1
ANKRD52	14	8	19	31	18	26	9	13	15	1	2	1	1	3	5	1	2	8	1	16	26	23	23	13	27	18	30	7	2	17	5	6	1	4	9	2	3	1	6	5	4	1	3	3	5	1	4	6	3
ANKRD53	13	14	14	38	40	44	7	14	22	1	1	1	2	1	6	1	1	2	3	9	23	18	11	21	35	27	26	7	11	14	8	3	1	2	11	2	4	4	9	3	1	3	1	5	3	2	1	2	1
ANKRD54	21	13	16	37	30	45	10	16	21	3	3	5	3	4	7	4	1	4	3	13	22	19	17	15	25	25	30	7	2	14	6	7	1	5	6	2	6	5	9	3	8	4	3	7	2	2	3	29	6
ANKRD55	8	8	10	25	29	31	2	9	6	1	1	2	4	1	3	1	1	1	1	5	11	7	5	13	29	9	15	4	5	5	5	1	1	2	5	3	6	1	3	1	2	2	1	1	1	1	2	3	1
ANKRD6	15	8	17	26	42	38	8	5	18	1	1	3	2	1	4	3	2	3	2	10	10	16	14	21	19	27	31	6	5	7	3	2	1	4	6	2	6	1	2	1	1	1	1	6	3	2	4	5	6
ANKRD60	14	11	39	53	47	76	14	31	38	1	2	1	1	1	6	4	1	2	1	10	17	25	15	26	40	16	33	11	5	14	12	6	1	2	6	5	11	2	5	3	2	2	2	8	4	1	1	4	1
ANKRD61	8	17	13	24	19	24	7	7	17	1	1	1	1	1	6	1	1	1	1	4	10	12	7	14	12	15	17	7	3	3	4	1	1	2	8	1	6	2	1	1	1	2	1	5	1	1	4	6	2
ANKRD62	22	8	28	36	71	80	13	24	23	1	2	4	2	1	1	1	1	1	1	8	15	19	16	24	20	14	25	3	2	15	2	3	1	1	11	1	3	3	1	1	1	1	4	5	1	2	1	3	1
ANKRD63	64	43	71	103	125	141	19	74	68	2	1	3	1	1	6	1	1	1	2	15	48	32	33	36	30	24	55	20	7	13	10	4	1	3	10	1	5	4	9	5	1	1	4	5	2	2	2	6	1
ANKRD65	31	25	37	76	75	111	19	37	36	5	1	6	11	2	2	3	4	6	3	12	26	24	26	35	50	36	40	11	7	14	6	5	1	6	18	3	7	3	6	1	5	1	1	6	7	3	1	7	3
ANKRD66	5	9	15	27	30	36	3	10	14	2	1	1	1	1	6	2	1	1	1	2	11	9	6	13	17	15	26	3	4	5	3	1	1	3	6	1	2	2	1	2	1	1	3	7	2	2	2	3	2
ANKRD7	15	12	19	36	39	47	11	13	15	1	1	4	4	2	4	1	1	1	1	11	16	10	15	21	32	15	25	12	1	7	2	1	1	4	4	1	7	1	5	2	2	1	1	2	2	1	1	5	1
ANKRD9	16	6	12	41	35	43	6	16	16	1	3	3	1	1	4	1	1	2	2	13	14	15	14	20	22	12	20	12	3	17	9	2	1	1	16	1	11	4	2	5	2	3	1	1	4	4	3	10	2
ANKS1A	13	6	7	32	24	25	5	9	17	2	1	2	1	1	2	1	1	4	1	3	6	18	16	10	22	20	22	3	5	9	4	2	1	4	10	1	3	2	1	3	1	1	4	5	1	4	4	1	3
ANKS1B	13	6	13	35	27	42	4	15	19	1	1	1	1	1	2	2	1	1	1	9	14	12	18	13	23	15	33	9	4	8	1	2	1	3	10	1	6	1	4	1	3	1	1	4	1	1	4	9	1
ANKS3	14	9	19	50	52	56	11	20	18	3	1	5	4	3	2	1	2	3	1	7	20	21	18	22	39	23	33	9	8	20	7	8	1	5	14	1	10	4	6	7	3	4	4	4	2	1	1	5	2
ANKS4B	19	6	20	46	34	47	10	22	23	2	2	3	1	1	3	2	1	4	1	7	26	22	18	15	25	23	31	12	8	10	8	4	1	4	5	1	6	4	5	4	1	1	3	3	1	2	1	6	5
ANKS6	21	11	32	61	77	79	7	29	28	6	7	13	4	8	3	2	1	15	3	14	35	36	31	22	31	21	30	14	7	31	9	11	1	6	15	2	11	7	7	8	6	5	5	11	3	2	1	5	1
ANKUB1	11	12	17	43	37	41	7	18	16	1	2	2	1	1	2	1	2	2	2	11	18	20	17	28	36	20	21	10	4	7	7	2	1	3	7	1	7	1	4	4	1	1	2	6	1	2	1	4	1
ANKZF1	20	12	15	44	38	59	16	18	27	4	5	5	5	1	4	3	1	7	1	17	22	27	24	21	39	27	41	26	4	33	11	9	1	5	8	1	9	7	5	6	1	3	3	6	1	3	3	10	7
ANLN	30	17	35	75	101	130	17	30	25	3	11	5	3	11	6	5	2	4	5	12	31	23	36	34	34	25	35	13	6	23	8	32	1	1	16	1	9	8	4	8	5	4	2	4	1	1	6	3	5
ANO1	43	6	64	36	199	286	4	51	23	5	5	1	2	6	2	1	1	15	4	7	22	29	56	48	24	16	36	10	3	42	11	30	1	12	22	1	7	7	14	34	15	10	2	28	3	2	6	4	4
ANO10	13	20	10	30	38	40	7	17	22	3	2	1	8	1	7	5	1	2	2	16	27	26	25	25	38	31	31	13	6	18	6	9	1	5	7	1	9	5	3	6	3	4	4	6	6	5	4	4	1
ANO2	29	20	31	66	77	84	18	26	26	3	1	4	4	1	8	1	1	4	2	7	30	19	22	27	36	34	35	12	10	13	3	5	1	12	12	1	4	3	5	4	3	3	1	4	5	6	2	10	2
ANO3	21	7	18	31	43	45	9	14	15	1	1	2	3	1	5	3	2	5	2	10	12	19	14	19	27	14	26	7	3	6	9	3	1	5	13	1	3	3	2	2	1	2	1	5	1	1	4	7	4
ANO4	20	17	30	50	50	61	12	19	26	1	1	5	3	1	4	2	1	3	1	11	18	22	24	11	35	16	37	9	6	15	8	2	1	1	4	2	7	2	2	6	1	4	1	10	2	2	1	10	1
ANO5	10	12	19	46	34	43	6	16	23	1	1	1	3	1	1	1	1	1	2	12	10	19	16	19	26	20	27	10	5	9	3	3	1	1	6	1	4	1	2	1	1	1	2	3	1	4	1	5	1
ANO6	17	17	26	80	72	63	12	35	24	9	9	19	6	8	11	3	4	30	10	16	43	24	24	33	29	21	36	17	10	29	10	17	1	4	8	1	10	5	12	17	5	11	6	15	7	3	3	10	3
ANO7	36	20	38	61	91	138	26	37	36	2	2	5	2	2	9	1	2	1	3	12	23	18	26	29	21	22	34	12	5	22	6	5	1	6	10	1	5	8	10	12	5	3	2	5	3	1	3	2	1
ANO8	13	9	16	33	34	51	8	14	16	2	2	5	4	1	3	2	2	4	1	8	14	8	13	7	18	13	15	8	5	28	5	6	1	5	11	1	12	8	4	8	3	7	1	7	1	2	2	9	4
ANO9	18	9	14	28	31	35	6	14	26	2	5	7	2	1	3	1	1	2	3	12	26	11	25	16	33	28	25	12	7	23	6	4	1	5	9	2	6	4	5	4	1	4	4	2	1	2	5	7	2
ANOS1	13	15	12	41	36	43	9	14	12	3	2	4	6	1	7	2	2	1	1	8	8	10	15	18	33	26	23	7	7	10	5	3	1	4	9	1	9	1	5	2	2	1	1	5	6	2	1	7	1
ANP32A	18	15	29	64	56	63	12	21	29	7	3	2	4	3	4	1	3	5	3	25	25	21	28	26	31	23	33	8	7	40	7	5	1	2	5	3	9	10	6	8	3	5	2	14	2	2	3	4	3
ANP32B	25	20	47	80	110	127	17	39	51	7	11	13	9	8	6	2	3	12	7	18	28	19	29	20	26	12	34	19	19	41	18	15	1	6	10	1	17	11	12	15	9	6	1	9	8	3	1	6	1
ANP32D	16	11	23	46	43	48	12	12	24	1	1	1	2	1	2	1	1	1	1	6	22	21	21	26	28	23	26	6	4	7	2	6	1	3	9	1	6	3	6	1	1	1	3	4	1	1	1	3	2
ANP32E	19	18	22	52	64	66	13	23	21	6	17	19	8	8	4	4	3	18	15	11	18	22	17	12	31	18	16	26	5	45	6	9	1	3	13	1	8	6	6	16	9	3	2	8	1	2	6	9	7
ANPEP	16	13	30	44	43	61	13	19	35	5	4	3	11	3	5	4	2	1	1	11	77	28	39	28	32	32	40	15	10	16	5	7	1	4	14	3	7	2	14	8	10	2	5	5	5	4	2	11	2
ANTKMT	1512	731	2313	3633	5046	4658	424	1591	1220	8	9	15	8	4	11	6	6	12	4	78	199	179	132	154	74	58	250	57	21	51	38	27	1	15	31	7	16	13	18	26	10	7	12	33	10	6	8	16	3
ANTXR1	15	9	14	43	45	52	14	17	37	7	1	9	9	1	6	5	1	5	1	10	15	24	17	14	34	28	33	9	8	11	6	6	1	6	9	1	9	1	6	6	2	1	7	8	12	1	6	9	2
ANTXR2	32	20	33	41	111	113	13	39	28	1	13	22	12	6	4	2	1	13	3	14	95	44	39	38	33	27	56	48	5	126	83	19	1	5	25	2	15	63	5	51	6	24	4	11	7	6	6	8	1
ANTXRL	6	9	12	32	33	43	9	18	25	1	3	1	1	1	2	1	1	1	2	10	13	15	16	24	27	20	36	7	3	10	5	3	1	3	10	1	4	3	4	4	2	1	1	5	2	4	1	5	1
ANXA1	14	26	31	151	119	232	25	20	53	44	32	94	113	39	71	112	30	69	36	43	31	34	46	55	46	39	27	7	59	37	29	46	1	25	11	3	56	10	152	30	61	18	11	23	19	6	14	45	2
ANXA10	67	11	50	28	152	183	15	37	16	1	6	6	2	7	3	1	1	7	2	4	102	78	22	29	31	20	71	79	4	293	156	13	1	5	45	1	12	48	4	39	4	12	1	5	6	4	5	2	3
ANXA11	44	11	55	48	155	185	9	36	32	6	22	31	9	18	4	4	1	41	13	25	142	96	78	75	41	26	87	79	10	143	37	47	1	2	33	1	26	21	15	79	10	35	7	46	12	2	5	20	4
ANXA13	33	25	42	66	74	96	20	43	32	2	3	2	1	1	3	1	1	2	1	15	26	28	20	21	24	21	46	8	4	18	6	3	1	5	9	3	5	4	3	5	2	1	1	2	2	1	2	4	1
ANXA2	232	109	372	717	793	1351	57	262	209	68	91	112	72	51	33	32	30	136	51	150	682	473	415	378	79	73	537	296	94	850	263	265	1	46	109	4	153	186	160	306	95	179	27	136	45	8	31	52	15
ANXA2R	25	23	31	50	33	74	16	11	27	1	1	1	2	2	2	1	1	5	1	13	18	15	13	12	29	16	32	12	5	11	5	5	1	1	14	1	6	2	7	5	1	1	3	5	3	3	4	6	4
ANXA3	28	11	49	32	158	161	11	30	20	3	15	17	4	9	7	3	1	9	5	11	66	82	70	54	28	16	56	19	6	50	21	23	1	4	65	2	7	9	4	12	5	17	1	8	4	7	12	14	3
ANXA4	79	24	100	57	237	348	16	73	29	5	21	32	3	16	6	2	1	24	9	13	197	108	110	70	18	31	134	46	5	94	49	9	1	3	31	3	8	14	8	19	5	4	2	44	5	1	2	4	2
ANXA5	40	30	70	181	216	318	24	28	68	19	20	27	35	17	24	24	13	32	12	58	164	91	76	70	38	36	100	23	19	101	37	19	1	12	19	1	38	33	53	53	44	60	13	24	31	1	5	9	6
ANXA6	10	8	12	45	46	29	19	15	26	6	1	1	2	1	3	4	2	3	6	10	12	13	14	10	32	15	24	8	5	5	4	4	1	1	9	2	8	1	5	1	5	3	1	4	2	2	1	2	3
ANXA7	19	17	29	56	89	107	14	23	28	7	11	12	15	3	6	6	5	13	6	26	71	32	34	43	35	36	67	30	12	57	17	25	1	5	15	2	14	15	15	13	7	10	6	26	10	6	3	20	6
ANXA8	24	15	24	55	65	94	14	26	21	1	6	10	2	13	5	1	1	6	3	12	33	14	23	23	29	17	35	7	8	14	5	51	1	1	10	5	6	1	3	12	2	5	1	10	4	4	11	19	2
ANXA9	20	14	19	34	36	50	10	11	19	3	9	9	3	1	4	1	1	4	2	13	20	12	21	20	27	26	28	10	3	9	6	6	1	5	9	1	8	2	6	3	3	1	1	13	1	6	4	6	1
AOAH	5	7	13	30	42	44	13	15	19	5	1	2	9	1	10	3	2	2	2	14	13	22	13	19	34	12	25	8	4	14	6	6	1	2	6	3	4	5	3	3	2	1	3	4	1	1	3	9	2
AOC1	38	16	25	42	53	51	16	37	40	3	16	25	3	7	4	1	1	16	4	8	79	35	34	33	38	23	61	33	4	91	43	13	1	1	15	3	8	10	7	13	4	5	4	9	4	2	2	2	1
AOC2	10	10	14	33	33	28	2	11	12	1	2	2	3	1	6	1	1	3	1	5	8	11	7	8	13	9	11	9	1	2	5	4	1	1	7	1	9	1	3	3	3	1	1	2	1	1	1	8	2
AOC3	15	9	12	41	23	49	8	14	19	2	1	1	1	1	4	1	1	2	1	17	28	22	13	24	21	22	38	8	8	7	5	1	1	8	34	1	4	1	4	2	5	1	3	4	4	3	3	4	1
AOPEP	12	11	16	37	41	35	5	21	21	5	2	2	3	1	3	1	1	6	2	6	25	21	16	13	28	18	26	15	7	21	7	4	1	4	10	1	4	4	3	4	1	2	1	7	1	2	2	8	3
AOX1	10	10	12	31	32	34	7	10	24	5	1	1	1	1	3	1	1	1	1	7	15	11	17	18	27	18	26	8	4	4	7	6	1	3	9	3	3	1	4	2	2	2	2	4	1	4	2	6	1
AP1AR	21	9	25	34	44	67	5	16	16	1	9	10	7	4	4	3	3	6	5	10	31	23	24	18	36	22	39	6	3	22	13	7	1	6	10	2	6	3	5	3	1	3	3	5	4	1	2	2	1
AP1B1	20	9	16	25	26	34	7	15	14	4	2	2	4	1	2	1	4	3	1	9	12	14	21	17	9	18	29	9	3	8	4	1	1	1	6	1	5	3	5	5	1	2	1	3	1	3	7	7	2
AP1G1	17	7	22	44	55	63	9	12	19	2	3	5	1	1	2	5	4	3	2	3	22	23	16	38	22	28	40	14	8	43	14	6	1	3	12	1	8	5	7	7	5	1	4	8	4	4	1	4	4
AP1G2	13	9	15	35	45	60	11	23	16	1	2	9	2	2	4	2	2	8	1	6	21	13	18	16	19	12	26	14	6	36	12	10	1	3	10	1	5	10	3	6	3	6	1	9	1	3	1	8	4
AP1M1	13	20	26	54	55	70	12	21	26	4	8	12	4	3	6	3	1	11	7	21	36	24	22	22	35	40	28	11	15	17	4	10	1	8	8	1	10	7	11	9	7	6	4	6	8	3	3	11	2
AP1M2	34	9	34	28	93	101	13	24	18	1	7	10	1	1	4	1	1	4	5	10	72	48	39	43	16	16	59	26	5	62	24	19	1	4	25	1	10	9	3	12	2	8	3	8	1	6	4	8	2
AP1S1	19	13	16	28	65	47	13	14	12	1	3	7	5	1	2	1	2	4	1	9	24	22	16	19	22	20	29	12	4	28	15	6	1	1	11	5	3	3	6	6	3	3	1	2	6	2	1	7	1
AP1S2	9	42	17	525	51	44	18	14	100	13	8	8	29	4	19	12	10	26	12	61	19	21	33	26	46	36	35	9	24	11	7	5	1	8	10	3	36	6	66	4	33	9	14	4	17	4	3	7	3
AP1S3	14	8	35	29	57	143	6	21	9	1	5	13	3	8	3	1	1	3	3	9	26	37	45	41	14	11	39	7	1	16	7	12	1	3	9	1	3	5	13	7	1	6	1	5	1	3	2	12	1
AP2A1	20	16	28	58	48	71	7	19	18	3	19	22	5	9	6	6	2	13	7	11	44	37	33	38	34	24	36	21	8	47	19	6	1	9	9	2	9	11	10	20	13	6	6	7	6	4	2	6	3
AP2A2	20	6	8	33	33	47	13	17	29	2	3	10	5	4	4	2	1	7	1	9	19	25	18	14	30	26	28	9	2	17	7	5	1	3	14	1	10	1	3	5	3	4	1	9	4	3	3	10	4
AP2B1	15	12	24	37	70	69	14	12	21	3	14	13	8	9	7	5	3	16	5	16	38	28	30	29	17	19	34	18	7	38	13	12	1	7	10	3	13	9	8	14	1	15	1	8	1	1	2	5	1
AP2M1	24	21	24	81	49	88	16	15	45	9	8	12	14	5	6	10	3	25	10	22	48	24	33	35	29	27	52	22	16	49	22	10	1	9	25	2	23	17	9	13	9	4	4	14	10	4	12	15	4
AP2S1	28	19	34	65	85	94	11	31	35	8	18	21	12	15	9	9	2	23	5	15	67	53	48	41	31	23	90	14	3	47	16	9	1	6	13	3	11	10	14	13	3	2	2	5	3	9	12	16	3
AP3B1	55	27	46	93	124	148	17	51	40	6	8	7	10	7	9	5	3	19	6	25	46	48	66	48	38	28	79	30	9	59	20	19	1	4	14	2	14	16	15	23	10	8	6	20	8	6	4	8	2
AP3B2	37	16	44	66	87	100	20	41	39	1	1	1	4	2	4	1	1	1	2	15	35	28	32	115	38	31	40	5	3	14	9	2	1	2	16	1	7	2	6	2	2	1	4	6	5	1	1	5	2
AP3D1	25	10	24	69	83	76	24	29	25	6	6	4	7	4	4	1	4	9	2	12	63	42	37	46	24	22	66	33	8	50	10	15	1	9	21	1	8	19	19	23	8	9	1	9	4	6	4	14	4
AP3M1	24	9	28	58	69	74	12	17	26	3	3	7	6	1	6	1	1	5	2	12	25	21	30	20	33	23	42	11	10	23	8	9	1	6	12	1	5	1	4	11	3	6	4	5	1	2	4	8	3
AP3M2	18	13	21	38	66	45	5	16	22	1	1	4	2	1	6	1	1	14	2	14	22	20	32	28	38	29	29	12	9	26	7	8	1	4	6	1	7	11	7	13	4	3	2	1	3	2	9	4	2
AP3S1	28	23	42	108	110	151	22	38	46	13	18	21	12	8	11	7	8	16	12	27	77	27	48	50	40	27	78	39	19	88	17	22	1	10	24	2	24	13	13	22	12	9	9	7	9	1	10	8	1
AP3S2	26	13	18	58	33	64	13	21	25	2	2	2	4	1	4	1	2	6	1	8	24	17	26	25	22	11	36	15	5	17	8	5	1	4	12	3	7	6	3	5	1	2	3	5	4	1	2	6	1
AP4B1	31	15	39	65	77	113	21	41	32	5	2	4	6	1	3	3	2	7	2	8	25	18	22	31	35	34	45	17	6	34	10	7	1	7	10	1	8	8	5	9	9	3	3	7	5	1	2	3	1
AP4E1	12	7	19	61	48	57	17	16	27	2	3	4	2	3	6	2	2	4	1	11	23	22	22	17	29	15	23	13	6	14	5	4	1	2	8	2	4	5	6	8	4	2	4	4	3	1	6	5	3
AP4M1	7	2	22	36	28	39	9	11	22	1	2	4	2	1	3	1	1	6	1	11	13	9	12	12	27	17	8	7	3	17	9	1	1	2	4	1	2	4	2	4	2	3	1	6	2	1	3	3	1
AP4S1	8	7	13	32	31	34	5	9	19	2	1	2	1	4	6	1	1	1	1	3	14	12	9	21	25	15	17	7	7	7	6	3	1	2	5	1	6	1	5	1	1	2	1	2	2	1	6	7	1
AP5B1	13	10	14	46	42	36	10	23	18	2	1	4	4	2	1	4	3	7	1	12	20	16	18	17	20	13	18	8	4	14	4	1	1	2	8	1	3	7	8	2	1	2	1	4	2	3	4	6	3
AP5M1	22	3	12	33	34	35	8	16	26	4	3	7	3	1	4	1	1	4	3	10	17	21	18	9	31	15	40	4	7	19	7	4	1	5	10	1	9	9	8	1	3	6	1	2	1	1	1	4	1
AP5S1	8	9	14	33	35	37	5	12	22	1	2	2	4	1	8	6	1	6	2	9	29	10	22	16	31	14	27	6	7	13	3	2	1	3	7	1	8	3	4	5	3	2	1	6	1	4	1	8	2
AP5Z1	15	4	14	32	39	56	10	14	25	3	2	4	2	3	1	1	1	1	1	12	30	23	27	23	30	20	39	17	2	22	6	4	1	2	10	2	5	7	5	8	1	5	2	11	2	3	4	16	2
APAF1	14	8	17	46	46	43	13	15	19	1	6	6	3	2	6	2	3	3	1	10	20	15	15	26	31	27	36	11	13	13	6	5	1	2	12	2	3	4	5	8	3	5	2	3	4	2	1	6	1
APBA1	6	10	15	30	17	33	5	8	22	1	1	1	5	2	1	1	2	2	1	5	17	11	15	18	31	24	15	7	4	6	10	3	1	1	9	1	2	1	1	3	2	2	4	1	2	1	2	7	1
APBA2	12	4	13	27	28	36	9	12	27	1	4	1	2	1	4	1	1	1	1	10	19	18	10	19	28	35	29	8	7	11	1	5	1	2	15	1	6	1	5	2	2	2	2	3	3	2	3	3	1
APBA3	24	21	31	51	60	59	15	17	25	4	1	4	14	3	10	1	3	3	1	7	44	16	33	29	49	217	51	55	9	18	8	17	1	6	14	5	18	6	14	9	4	6	2	5	6	1	1	9	4
APBB1	11	14	14	51	41	43	20	14	40	2	3	4	8	1	11	3	1	4	1	12	36	14	22	21	43	30	33	7	6	8	5	3	1	5	21	2	13	4	7	2	4	1	1	6	3	2	4	7	1
APBB1IP	15	8	15	26	28	32	10	10	19	5	1	3	6	1	6	1	1	2	1	10	23	27	18	19	30	20	31	7	3	9	2	4	1	7	7	1	2	1	4	3	1	2	1	1	3	1	2	9	2
APBB2	12	10	19	54	46	70	15	18	31	1	3	2	6	1	4	1	2	8	2	18	16	23	14	16	47	43	39	12	12	16	6	4	1	3	11	1	10	5	6	5	6	1	1	5	7	5	1	7	1
APBB3	12	19	17	42	56	42	11	11	29	11	1	6	9	3	18	9	7	12	6	15	21	14	23	15	26	25	24	28	9	35	20	8	1	7	14	3	22	9	6	6	3	3	2	8	6	2	1	10	2
APC	5	6	5	12	15	21	6	5	10	2	2	2	4	1	3	1	1	1	2	14	14	17	15	14	31	23	21	12	4	17	3	2	1	1	11	3	11	4	5	1	1	1	3	6	1	1	1	10	2
APC2	25	16	22	51	58	55	13	29	27	3	3	2	12	1	6	4	1	2	1	15	22	12	17	22	27	18	31	11	7	8	6	5	1	3	9	3	8	1	5	2	2	2	3	4	4	2	4	7	1
APCDD1	19	18	19	43	46	62	15	18	29	12	2	1	11	2	17	10	5	12	17	12	14	23	29	32	51	41	30	7	13	7	6	2	1	12	9	1	33	5	9	2	6	2	2	5	15	3	2	12	3
APCDD1L	9	10	10	41	37	59	7	14	20	3	1	3	2	1	2	2	1	3	1	9	21	13	22	19	22	29	21	5	3	8	5	3	1	3	44	1	5	2	3	2	5	1	1	5	1	1	5	3	6
APCS	14	13	23	41	45	47	13	18	23	1	1	2	5	1	3	1	1	1	1	11	13	12	35	27	31	14	25	6	6	9	6	1	1	1	7	1	2	2	5	2	3	3	1	8	1	2	3	4	3
APEH	17	4	19	45	53	54	6	20	26	2	3	6	2	1	6	1	1	2	1	7	23	11	21	15	20	19	33	7	4	17	8	5	1	1	64	1	4	6	4	4	1	2	1	5	1	2	1	4	2
APELA	10	7	15	33	34	32	4	8	17	1	2	1	1	1	2	2	1	1	1	11	13	13	16	22	29	24	20	5	8	9	4	6	1	1	9	2	5	1	3	3	1	1	1	4	1	1	2	6	2
APEX1	17	11	26	38	76	57	8	15	20	2	5	7	2	1	6	1	2	9	4	10	25	20	27	19	26	20	39	8	5	18	5	11	1	4	9	1	4	3	4	4	4	4	3	5	1	4	2	10	1
APEX2	10	7	15	25	26	29	6	15	17	3	2	3	2	1	2	1	1	6	2	8	18	13	15	19	16	17	21	10	2	13	4	1	1	3	7	1	1	1	6	1	6	2	1	5	1	4	3	4	1
APH1A	14	9	53	48	112	126	6	28	25	3	14	18	7	3	5	1	1	23	9	15	38	25	26	24	22	22	44	35	8	79	30	21	1	5	27	1	7	19	7	25	3	8	2	18	4	1	3	8	1
APH1B	25	12	30	55	53	101	12	29	37	3	2	1	4	1	2	2	2	5	2	9	22	26	23	21	23	17	38	17	6	20	8	9	1	2	10	2	8	4	3	12	3	6	2	6	3	2	1	7	3
API5	25	4	24	46	55	66	3	18	29	3	14	4	8	4	1	1	5	11	7	8	42	16	19	18	29	23	33	11	5	30	13	7	1	5	10	1	12	3	9	3	2	5	3	6	7	3	10	9	4
APIP	47	24	54	59	85	119	16	39	48	2	3	5	9	2	4	7	1	8	7	10	39	17	24	31	37	26	47	22	11	23	5	7	1	1	10	4	16	9	3	14	2	5	1	5	2	1	1	6	3
APLF	6	7	11	34	27	39	9	8	19	1	1	4	5	1	6	5	1	3	2	6	8	5	8	8	17	23	17	5	2	6	3	2	1	1	1	1	7	4	1	4	4	4	2	3	1	1	3	3	2
APLN	16	6	17	23	28	46	13	6	23	2	1	3	3	1	6	1	1	3	1	9	12	13	17	16	23	18	23	3	4	4	4	1	1	1	7	1	2	1	2	1	1	1	1	4	1	1	2	6	1
APLNR	6	11	16	30	34	43	11	17	15	1	2	1	1	2	3	1	1	1	1	4	8	14	10	18	28	12	22	4	2	3	7	3	1	3	4	1	5	1	3	1	1	1	1	3	3	1	5	5	1
APLP1	11	10	17	49	25	36	9	14	21	1	1	4	3	1	5	3	3	4	3	9	11	20	18	19	22	27	21	9	2	10	4	3	1	19	8	6	8	1	5	2	5	2	2	3	2	2	5	9	3
APLP2	79	60	200	189	486	653	43	88	135	40	78	105	63	42	44	26	18	149	68	73	409	186	222	217	102	57	351	79	22	179	44	67	1	14	54	4	46	35	28	35	22	26	14	39	13	8	16	18	10
APMAP	2351	4972	2848	15605	3701	10261	3312	2512	10702	81	90	114	158	33	113	56	59	138	72	725	826	533	516	466	750	675	744	435	204	456	255	154	1	169	179	22	361	108	159	165	77	70	125	153	110	15	23	34	6
APOA1	15	5	12	35	33	49	7	10	18	1	1	2	2	1	2	1	1	1	1	5	13	13	13	7	10	21	11	8	3	6	4	3	1	1	5	1	4	2	3	3	1	1	1	1	1	1	1	2	1
APOA2	11	15	28	43	72	60	7	21	22	2	2	4	2	4	1	1	1	1	1	11	12	12	7	25	22	20	32	7	5	14	8	6	1	1	1	1	7	2	5	1	1	1	1	6	3	3	3	6	5
APOA4	12	10	10	46	34	57	9	15	25	2	1	2	1	1	5	2	1	4	1	9	16	16	13	17	24	13	26	10	5	15	1	4	1	2	8	1	3	1	6	3	3	1	1	2	2	1	1	4	1
APOA5	12	9	13	28	16	35	3	6	12	2	1	2	1	1	3	1	1	3	2	9	16	11	11	20	26	18	26	7	4	7	5	2	1	4	9	1	3	3	2	2	1	1	2	3	1	5	3	3	4
APOB	24	9	34	65	57	86	14	23	24	1	2	1	4	1	1	1	2	1	2	8	31	27	31	32	42	21	56	11	5	16	8	7	1	1	9	2	4	2	3	1	2	1	4	8	3	4	3	8	1
APOBEC1	19	14	18	24	39	38	5	10	13	1	3	5	4	2	1	1	1	3	1	16	21	16	13	15	25	18	31	14	8	30	9	8	1	1	14	2	1	4	2	4	1	4	2	2	2	2	3	3	2
APOBEC2	14	6	14	30	30	43	11	10	18	1	2	1	2	1	1	1	1	1	1	5	13	10	11	13	18	17	19	7	4	5	3	4	1	1	6	2	6	1	1	1	1	2	5	2	2	1	1	4	1
APOBEC3A	14	7	20	38	26	38	11	11	17	1	1	2	1	1	5	1	1	1	1	7	11	15	12	16	33	20	24	5	6	6	6	1	1	4	7	2	7	2	2	3	3	3	1	5	3	3	4	7	3
APOBEC3A_B	526	237	515	769	1260	1986	247	557	442	46	101	157	78	63	30	43	36	153	90	137	470	336	336	236	192	188	494	291	90	415	114	103	1	66	127	9	146	147	68	139	50	78	42	103	27	13	23	24	17
APOBEC3B	14	19	20	31	25	46	12	19	22	2	1	3	2	1	4	1	1	3	1	5	10	6	22	21	17	20	17	3	3	8	3	1	1	2	3	2	4	1	3	1	1	4	1	5	5	2	1	7	3
APOBEC3C	1	12	14	36	29	28	6	10	12	6	2	3	5	1	3	2	1	2	1	9	13	12	13	15	25	17	17	11	10	10	8	13	1	1	8	1	9	1	3	2	1	1	1	10	4	1	2	6	4
APOBEC3D	8	12	10	31	32	31	12	14	16	3	11	5	2	1	7	1	2	2	1	10	21	15	26	23	23	21	18	7	8	10	3	3	1	4	4	1	5	3	1	3	3	3	3	2	1	1	5	1	1
APOBEC3F	19	13	24	55	63	68	25	29	31	4	6	3	1	1	3	1	3	4	4	12	21	16	19	20	28	32	35	16	3	11	9	4	1	4	5	1	6	1	4	4	8	3	2	6	7	1	1	4	1
APOBEC3G	9	10	9	36	36	34	13	8	25	4	1	4	5	1	4	2	1	6	2	15	14	9	14	22	37	18	30	5	5	13	6	7	1	1	8	2	8	1	5	4	4	1	1	3	2	1	2	4	1
APOBEC3H	10	18	19	48	33	48	13	9	18	1	2	3	1	1	1	1	1	1	1	8	10	18	15	19	39	9	17	9	1	8	6	3	1	3	6	1	6	2	5	2	3	2	2	2	2	3	1	5	1
APOBEC4	13	4	21	32	31	42	11	18	21	1	2	2	6	1	2	2	1	1	2	9	14	10	10	14	21	16	23	8	6	10	3	1	1	7	13	1	7	1	3	2	2	1	2	4	1	1	1	4	2
APOBR	7	12	13	21	28	42	10	9	14	1	1	2	1	1	1	1	1	1	2	6	15	8	11	9	16	10	18	5	2	13	8	3	1	1	7	1	1	2	1	1	7	2	1	4	1	2	1	6	1
APOC1	12	43	16	55	38	44	11	19	65	28	1	7	14	3	8	7	5	4	2	17	17	16	13	21	32	24	32	15	2	23	5	4	1	13	10	1	8	2	8	3	21	13	4	13	13	3	4	7	2
APOC2	13	10	17	37	37	37	14	9	16	4	1	2	3	1	1	3	1	1	1	9	8	8	15	16	27	15	16	5	4	8	3	2	1	8	6	1	6	3	3	3	2	1	1	1	2	1	1	3	1
APOC3	20	19	28	60	56	69	17	14	22	2	1	3	1	1	4	1	1	1	3	14	24	18	18	17	25	21	28	3	2	14	4	6	1	3	6	4	7	2	3	3	4	1	4	2	1	3	2	7	1
APOC4	20	16	20	43	32	64	11	13	20	2	1	2	2	1	5	1	1	2	1	9	22	12	9	19	32	24	25	7	2	7	8	3	1	4	9	1	3	3	2	2	3	5	1	2	7	1	4	3	1
APOD	20	214	27	179	40	43	235	18	109	41	4	6	156	5	22	28	33	9	4	721	21	17	25	25	106	76	19	17	363	14	11	4	1	42	7	6	367	2	93	2	59	1	64	3	405	2	3	8	3
APOE	19	70	30	72	57	78	16	43	108	19	2	3	20	4	19	14	9	4	5	57	25	22	31	14	28	15	25	14	8	21	2	10	1	14	8	1	7	4	13	1	21	4	6	10	23	2	2	2	3
APOF	41	24	43	60	69	145	37	36	44	4	6	6	7	3	4	2	5	11	7	12	28	24	21	34	28	27	45	13	6	26	8	7	1	3	12	3	7	6	6	6	2	5	2	12	4	4	4	4	2
APOH	13	11	15	47	42	58	14	12	27	1	1	2	4	1	3	1	1	1	1	7	16	13	19	17	34	35	27	6	1	5	6	2	1	1	6	2	8	3	4	5	1	1	1	2	1	3	3	8	1
APOL1	45	13	21	48	68	116	12	95	25	3	7	29	5	10	3	2	3	18	15	15	118	47	43	63	29	28	70	35	11	60	14	30	1	5	8	2	8	12	11	27	6	9	8	30	5	3	4	12	3
APOL2	39	9	28	45	47	66	13	24	33	4	2	12	2	4	7	2	2	3	1	13	48	21	16	23	25	29	37	15	6	14	9	5	1	2	32	1	5	7	9	4	6	4	1	12	4	4	4	8	1
APOL3	17	10	11	32	43	40	18	19	26	4	2	5	6	2	5	3	2	5	1	14	13	23	12	23	25	30	25	7	3	12	3	4	1	4	7	4	8	3	3	2	1	3	1	2	5	3	1	2	1
APOL4	18	12	12	39	55	49	10	21	22	1	2	4	2	2	6	1	1	2	1	10	18	20	17	12	36	21	21	7	7	9	8	6	1	4	7	1	10	2	2	6	6	3	1	4	5	1	1	6	5
APOL5	11	13	21	40	41	42	10	17	15	1	2	2	1	1	2	3	1	1	1	8	19	12	16	18	24	17	31	10	4	3	5	2	1	1	11	1	4	1	3	3	2	1	1	5	1	1	1	4	1
APOL6	18	23	16	47	60	64	17	18	21	2	5	8	6	1	5	1	2	7	2	15	19	20	24	27	25	17	31	17	3	17	3	7	1	1	10	1	11	1	7	13	1	5	2	2	2	1	4	10	2
APOLD1	9	13	18	33	44	37	11	18	9	4	1	1	7	1	11	1	1	3	1	17	19	17	18	20	39	27	31	13	13	13	7	6	1	3	10	1	13	2	3	5	7	4	5	7	1	2	2	8	3
APOM	10	10	12	36	33	36	12	9	24	1	1	4	4	1	3	1	1	2	1	9	18	27	19	34	33	31	32	11	4	7	6	3	1	2	10	1	7	1	1	5	1	1	4	4	6	3	2	8	1
APOO	66	41	85	101	130	233	48	56	62	5	6	3	8	1	4	4	1	4	5	10	18	35	27	12	31	29	41	15	2	16	5	10	1	3	5	2	16	3	5	3	3	7	1	6	3	3	2	6	1
APOOL	22	12	18	43	50	55	9	11	17	5	5	6	9	1	3	1	2	3	6	7	19	16	19	12	25	20	28	7	8	14	11	5	1	3	12	1	5	3	3	2	3	2	4	3	1	2	2	4	1
APP	93	52	153	140	434	576	26	115	93	36	22	45	71	14	32	44	26	32	14	78	133	75	119	77	83	58	126	119	48	262	84	71	1	32	57	1	64	27	48	37	32	34	23	46	36	18	15	48	15
APPBP2	22	21	23	38	58	71	18	23	23	5	4	5	7	2	4	2	1	11	5	19	38	26	31	22	25	17	47	10	7	27	7	13	1	5	9	3	5	9	5	15	9	7	3	6	6	2	2	4	1
APPL1	13	16	21	60	44	59	15	16	32	5	4	6	8	7	6	2	3	7	4	24	35	23	28	30	35	33	34	19	8	49	8	10	1	11	10	1	14	5	15	8	8	5	7	13	10	3	2	6	1
APPL2	8	13	21	44	59	46	7	15	14	1	3	2	3	1	2	2	2	3	2	9	30	23	15	21	24	12	20	11	3	14	6	3	1	4	3	2	4	7	3	4	5	5	1	4	3	3	4	5	1
APRT	28	13	51	66	109	106	16	36	35	2	8	8	6	7	2	1	2	5	2	21	94	65	50	40	38	17	67	30	6	73	14	8	1	6	23	3	4	12	5	8	6	9	1	10	2	2	3	16	2
APTX	30	21	41	85	123	161	19	36	50	8	16	11	9	9	6	5	4	12	5	26	82	27	28	18	24	27	49	30	16	64	15	6	1	5	8	1	11	8	9	13	5	6	5	14	2	2	6	6	1
AQP1	22	10	18	45	51	61	17	31	27	6	5	6	5	2	7	2	1	4	2	8	19	14	20	16	35	25	18	11	4	11	2	6	1	3	8	1	12	1	5	2	3	2	5	2	9	2	3	6	4
AQP10	14	9	12	30	32	36	10	12	22	1	1	3	3	1	1	2	1	3	4	5	20	14	10	20	26	26	28	15	2	12	2	1	1	2	16	4	1	5	3	2	1	1	2	3	2	1	5	6	1
AQP11	5	12	28	37	81	59	10	16	20	2	1	1	6	1	3	2	1	3	1	11	15	16	21	22	21	25	25	7	4	14	4	5	1	6	16	1	3	3	7	7	3	2	1	7	2	1	1	6	5
AQP12B	13	9	12	34	35	37	11	10	12	1	1	5	2	1	1	1	2	4	2	8	13	16	9	16	20	16	18	5	3	6	3	4	1	2	17	2	2	6	2	1	2	1	2	1	1	1	2	3	1
AQP2	9	7	13	35	23	24	6	13	12	1	1	1	2	3	2	1	1	1	1	7	7	14	13	11	21	11	18	2	4	6	6	1	1	2	5	1	2	1	3	2	2	1	1	2	1	3	3	3	1
AQP3	14	8	46	37	103	231	16	27	22	2	20	65	4	28	3	2	2	77	42	8	21	19	57	21	30	19	22	17	4	24	4	24	1	3	17	1	7	7	5	28	1	3	2	16	1	13	52	21	13
AQP4	5	11	10	55	37	30	14	12	23	1	1	1	3	1	3	2	2	1	1	7	14	13	15	17	37	22	24	7	2	11	6	2	1	4	9	1	4	1	1	3	3	1	1	3	3	1	3	3	1
AQP5	16	10	17	29	38	28	10	9	21	1	4	8	3	1	8	2	1	6	3	9	22	18	32	17	25	20	35	3	3	7	2	1	1	3	6	1	5	4	2	5	1	1	6	3	2	1	1	4	1
AQP6	2	11	14	28	31	28	5	10	20	1	6	7	2	2	3	1	1	11	5	4	15	14	10	15	30	13	27	4	1	6	6	4	1	1	12	1	6	1	1	3	1	1	1	2	2	1	7	5	1
AQP7	14	20	15	62	60	73	12	18	32	14	8	18	14	2	4	3	5	23	8	20	24	21	26	32	43	31	38	22	12	28	2	9	1	15	9	2	18	6	10	5	4	2	2	7	1	1	1	4	2
AQP8	5	5	16	24	27	25	3	9	10	2	1	1	3	1	4	1	1	1	2	4	9	12	9	14	13	14	13	3	4	7	3	2	1	1	11	1	1	1	1	3	2	2	2	3	2	2	4	5	1
AQP9	9	11	14	54	47	55	9	14	30	1	2	1	3	1	7	2	1	1	2	11	16	17	13	20	25	23	23	5	3	7	5	6	1	3	5	1	7	3	5	1	4	2	5	3	3	3	1	9	4
AQR	3	4	14	22	28	34	6	8	15	1	1	4	1	1	3	1	1	4	1	8	17	16	13	18	19	21	11	6	2	14	3	4	1	2	9	1	7	5	6	9	2	2	3	6	1	5	2	8	3
AR	16	14	15	29	28	42	12	12	21	2	1	3	2	1	5	1	1	3	2	9	14	17	20	25	31	23	24	3	3	12	5	3	1	1	7	1	2	1	6	5	1	1	3	2	1	3	2	4	1
ARAF	15	8	20	46	52	59	10	14	28	4	7	8	6	7	8	3	3	3	2	11	48	25	26	31	37	35	40	16	9	22	14	7	1	2	9	2	9	2	7	9	6	9	5	6	4	8	1	6	1
ARAP1	18	29	30	63	76	90	25	22	34	6	4	11	5	1	4	1	2	7	2	20	34	19	19	31	41	33	33	9	11	25	2	7	1	5	15	4	9	2	7	3	3	2	7	8	3	5	7	7	1
ARAP2	12	15	18	38	44	60	17	15	26	1	3	13	5	1	3	5	2	6	4	11	17	21	28	28	43	28	24	18	4	25	10	9	1	2	10	1	9	5	6	14	3	8	1	5	1	1	2	7	2
ARAP3	13	8	24	55	43	70	20	22	31	5	6	9	2	2	7	2	5	7	8	7	25	34	17	22	34	20	32	11	10	19	7	5	1	3	17	2	13	8	10	14	3	10	5	14	3	4	3	10	1
ARC	10	18	18	40	39	48	20	18	21	2	1	5	8	1	2	5	1	1	1	12	20	18	17	16	27	19	22	10	8	12	60	1	1	6	26	1	10	1	90	5	11	3	11	5	4	2	2	6	2
ARCN1	15	7	35	73	116	115	15	16	23	1	1	6	4	1	3	3	1	2	2	12	40	22	15	29	33	25	45	13	3	12	5	2	1	2	7	3	7	4	2	5	3	1	1	2	2	1	2	5	3
AREG	13	7	17	40	52	94	12	12	20	1	7	8	9	1	4	3	4	8	2	7	25	16	24	18	25	17	25	21	6	28	10	8	1	5	16	1	5	2	8	14	3	8	3	5	2	2	3	1	1
AREL1	14	21	28	60	51	63	9	19	33	3	7	11	4	1	3	4	5	9	3	16	18	15	25	19	28	22	29	16	4	33	7	7	1	3	4	1	4	7	5	8	4	3	3	6	7	1	1	3	2
ARF1	116	56	194	205	341	507	27	125	79	44	135	199	50	57	28	20	25	148	79	54	251	124	98	100	38	37	172	317	45	643	147	136	1	53	166	1	73	153	65	178	50	83	11	99	27	7	9	26	8
ARF3	22	5	16	50	48	77	11	21	23	9	23	53	16	13	14	10	5	20	12	19	83	53	47	54	29	28	68	23	10	75	33	18	1	6	23	2	21	14	10	22	8	12	5	11	3	3	4	12	1
ARF4	31	19	61	146	162	201	22	46	53	9	34	53	19	10	7	7	4	58	18	33	116	66	57	53	32	27	91	68	22	136	54	30	1	21	40	5	24	32	32	53	17	29	5	24	11	1	5	37	3
ARF5	24	28	37	77	83	118	19	45	46	8	13	15	11	11	4	3	2	12	6	22	102	49	39	54	21	30	75	50	15	104	42	36	1	11	31	1	12	24	25	35	9	15	6	22	9	4	10	23	8
ARF6	34	26	92	76	148	212	23	50	50	15	42	63	31	25	20	20	15	61	34	24	51	26	48	37	37	26	52	47	16	113	27	33	1	13	20	3	40	37	45	44	21	19	10	28	8	3	14	17	5
ARFGAP1	17	67	21	43	46	57	18	15	16	4	5	4	6	3	1	2	1	3	6	16	22	25	20	19	29	27	22	14	3	29	8	4	1	4	51	4	4	8	11	12	6	4	3	5	1	4	4	8	1
ARFGAP2	6	4	9	29	31	49	9	11	17	3	1	4	5	1	3	3	1	3	1	8	30	18	20	20	30	20	21	10	5	16	8	5	1	3	3	1	15	3	4	8	5	1	4	3	3	1	3	2	1
ARFGAP3	27	15	33	58	103	126	17	38	30	10	17	43	15	10	9	13	4	32	18	24	105	72	70	63	33	26	80	32	9	54	28	24	1	9	22	2	17	20	18	34	20	10	6	11	4	3	5	5	1
ARFGEF1	21	11	25	39	59	86	12	21	14	4	16	21	9	6	3	2	3	17	8	11	43	38	28	31	31	14	41	37	12	69	17	19	1	3	16	3	13	11	11	22	6	7	4	24	1	2	5	7	1
ARFGEF2	11	11	29	32	51	68	11	17	26	3	5	4	6	1	6	1	1	8	4	10	20	22	13	25	33	21	43	15	5	38	7	7	1	4	10	1	3	5	6	6	6	5	4	6	3	1	1	11	1
ARFGEF3	8	5	13	22	27	43	4	11	17	1	1	4	1	2	1	3	1	1	1	17	17	19	14	13	21	19	32	7	2	15	7	3	1	5	8	1	3	3	2	4	1	2	1	4	1	2	1	6	3
ARFIP1	15	5	19	27	39	64	4	16	22	1	11	7	2	3	5	1	2	8	3	10	23	18	19	17	30	26	39	11	4	21	9	2	1	1	13	2	9	9	4	6	2	5	3	7	4	2	4	4	2
ARFIP2	18	18	21	46	89	65	10	16	26	4	5	8	4	1	9	1	2	9	1	19	33	23	24	17	27	34	29	26	6	26	5	8	1	2	6	1	13	6	6	2	4	3	3	6	1	2	2	6	3
ARFRP1	31	19	36	48	69	75	13	24	23	6	7	15	7	4	4	4	1	17	8	16	31	30	29	23	32	16	38	20	5	49	20	6	1	5	16	1	11	10	10	19	5	13	2	12	6	5	7	11	2
ARG1	13	6	18	53	55	44	12	22	27	1	1	2	1	1	8	1	2	2	3	10	12	15	18	20	27	22	33	10	3	9	4	7	1	10	12	1	3	2	4	3	2	2	6	5	1	1	3	2	1
ARG2	19	11	13	38	26	28	10	7	25	1	1	1	3	1	3	1	1	2	1	9	11	19	10	11	19	26	28	10	2	5	3	4	1	2	1	2	6	4	2	5	4	1	2	2	1	4	2	2	1
ARGFX	7	6	2	10	10	19	6	2	3	1	1	2	4	1	2	2	1	1	1	4	12	15	26	23	24	14	22	3	5	4	5	2	1	6	9	2	4	1	6	1	2	1	1	2	4	2	1	7	1
ARGLU1	83	22	63	85	148	208	34	62	47	19	62	89	37	45	28	19	12	84	57	35	145	104	101	76	59	42	188	58	22	222	26	60	1	20	35	2	40	35	31	64	19	33	8	52	14	2	2	5	1
ARHGAP1	23	11	21	53	77	68	10	28	25	3	11	13	14	1	7	4	3	6	6	20	45	22	23	33	33	32	51	17	8	34	15	16	1	4	10	2	6	5	7	8	3	1	4	4	7	1	3	4	12
ARHGAP10	10	19	16	34	37	52	10	15	20	2	1	4	3	1	5	2	1	1	1	16	20	14	25	29	30	26	30	12	6	10	10	1	1	4	10	3	6	2	6	6	6	2	1	2	7	3	3	7	2
ARHGAP11A	21	15	19	35	54	56	8	17	17	2	2	2	3	1	4	2	1	2	1	8	15	8	16	11	20	17	37	9	2	12	5	3	1	3	6	3	3	2	2	1	3	2	1	2	1	2	4	5	3
ARHGAP11B	25	16	21	44	65	52	9	39	33	2	5	5	2	1	6	1	1	1	1	8	35	27	27	24	32	22	35	9	7	23	4	5	1	5	9	1	7	4	2	2	1	2	1	6	1	3	1	1	1
ARHGAP12	13	8	18	42	48	60	9	22	19	1	2	12	6	5	5	4	1	12	7	14	38	34	27	33	27	41	39	36	6	34	19	9	1	2	13	1	19	25	3	11	3	11	3	27	6	4	3	6	8
ARHGAP15	12	17	10	33	37	40	21	19	40	9	2	1	33	3	11	12	7	1	1	21	20	23	19	12	56	34	25	6	7	17	6	2	1	14	7	4	9	4	16	3	3	1	12	1	3	1	2	6	1
ARHGAP17	18	12	24	49	64	51	18	15	29	4	5	9	13	2	2	4	3	11	3	8	49	26	36	34	43	23	61	23	13	36	14	11	1	9	17	2	12	8	10	15	9	7	6	14	2	1	2	4	1
ARHGAP18	19	17	52	57	130	112	14	34	24	8	6	17	18	3	11	1	2	21	9	8	31	16	26	31	31	24	41	12	11	41	14	10	1	3	20	2	11	12	7	10	3	4	5	8	5	3	1	4	3
ARHGAP19	8	10	10	39	30	35	12	10	17	5	1	1	6	1	2	1	1	1	3	6	14	15	15	17	35	19	23	11	8	8	1	8	1	2	10	1	10	2	3	3	2	2	3	3	2	5	5	13	1
ARHGAP20	21	12	15	43	48	70	15	19	22	1	2	1	3	1	5	1	2	2	4	5	17	14	7	20	31	26	36	8	5	17	5	5	1	2	10	3	6	3	3	2	1	2	6	7	3	1	1	28	1
ARHGAP21	11	12	17	42	44	50	7	19	23	5	11	11	12	3	6	6	1	10	2	8	29	30	30	24	41	26	44	34	9	56	12	15	1	7	13	2	13	5	15	28	8	18	2	16	4	3	3	14	5
ARHGAP22	6	6	10	25	31	25	9	10	17	1	1	3	4	1	4	1	1	2	1	12	16	12	17	17	24	20	27	9	4	7	2	3	1	7	7	1	2	3	7	3	2	1	4	3	2	1	2	6	1
ARHGAP23	9	14	17	32	53	71	8	15	17	3	3	8	6	4	3	3	1	7	6	12	16	9	15	20	17	21	25	4	8	5	3	3	1	2	21	1	7	3	4	2	5	2	4	4	6	3	1	3	2
ARHGAP24	11	18	20	39	30	43	6	10	22	3	3	1	5	1	6	2	1	2	1	12	13	9	17	15	21	13	19	3	3	6	6	2	1	4	4	2	5	1	5	1	1	1	2	1	5	1	1	7	2
ARHGAP25	8	10	10	31	31	39	10	8	19	2	2	2	4	1	3	3	1	1	1	7	19	15	16	25	22	19	20	4	9	13	5	4	1	3	8	4	7	1	4	2	2	4	4	5	3	1	3	8	2
ARHGAP26	35	21	41	56	84	121	18	35	43	11	14	23	7	6	11	5	4	22	15	17	46	32	42	43	42	23	63	42	10	82	38	19	1	8	35	1	15	23	8	12	3	9	6	20	2	2	2	8	1
ARHGAP27	83	24	53	83	152	227	26	77	50	7	19	24	10	9	5	1	4	26	8	22	100	76	65	61	41	31	75	42	8	89	27	23	1	3	32	1	11	17	6	23	5	8	5	16	6	2	4	7	1
ARHGAP28	8	7	18	21	31	38	13	15	23	1	1	1	7	1	3	1	1	2	1	12	18	8	14	24	40	17	18	9	3	7	6	1	1	2	8	1	8	1	4	2	1	1	2	2	3	1	1	5	1
ARHGAP29	13	7	16	34	34	43	9	18	16	2	1	2	3	1	7	1	1	2	2	5	16	15	18	21	37	28	26	5	3	4	7	5	1	3	30	2	11	5	5	6	3	1	6	4	3	2	4	7	1
ARHGAP30	5	12	7	23	38	33	6	11	9	1	3	4	3	1	4	2	1	8	1	7	11	19	15	12	30	18	20	6	3	16	5	3	1	3	6	1	6	4	2	1	1	1	2	4	1	4	2	3	1
ARHGAP31	69	30	55	100	94	122	21	61	40	1	2	3	4	1	3	1	2	2	2	16	22	38	26	15	34	21	39	4	10	10	4	3	1	2	5	1	9	3	4	4	4	3	3	3	2	1	3	5	1
ARHGAP32	10	7	31	36	53	61	9	18	28	2	6	14	5	6	5	2	4	11	3	10	52	32	37	37	37	32	52	17	7	41	12	11	1	5	16	1	6	12	10	6	4	9	3	6	6	4	5	10	4
ARHGAP33	12	6	14	29	28	44	7	14	17	4	4	3	2	1	5	1	1	1	1	11	14	14	16	22	25	30	24	8	7	10	9	5	1	3	10	2	6	2	5	3	2	1	4	6	3	1	1	7	3
ARHGAP35	12	7	11	36	28	34	7	10	24	4	9	5	2	2	1	1	1	11	4	5	16	19	18	16	18	18	32	17	8	17	8	2	1	5	12	4	5	9	4	6	4	7	3	6	3	2	1	2	3
ARHGAP36	17	12	20	45	30	37	10	7	19	2	1	1	2	1	2	2	1	1	1	9	15	18	12	18	31	14	26	8	7	7	3	2	1	1	9	3	4	1	3	2	2	1	3	5	2	2	2	6	1
ARHGAP39	12	10	13	35	44	31	12	9	24	2	1	3	6	1	3	8	3	2	1	13	12	14	17	17	28	29	15	7	9	11	5	7	1	3	9	1	6	1	8	3	1	6	3	2	2	2	3	8	2
ARHGAP4	6	9	8	27	20	35	8	11	28	6	9	14	5	8	8	1	1	18	6	16	18	10	18	21	36	27	17	47	7	67	19	24	1	7	30	1	9	25	10	12	3	8	4	10	7	3	1	5	1
ARHGAP40	30	13	62	76	80	151	18	37	31	4	1	6	5	2	5	1	1	10	4	6	26	18	12	22	30	19	29	12	3	13	7	2	1	3	11	6	2	2	6	3	2	1	2	4	1	2	3	6	1
ARHGAP42	11	9	23	41	36	32	10	16	21	1	2	5	2	2	7	2	1	3	1	3	14	9	10	19	24	19	28	1	4	6	4	2	1	1	11	1	3	1	3	2	2	1	4	3	1	2	5	6	1
ARHGAP44	15	13	24	30	39	49	9	24	24	2	2	3	3	1	5	1	2	4	1	4	20	11	13	10	25	25	16	5	5	8	7	2	1	2	12	1	5	1	2	1	1	3	2	1	1	1	1	7	2
ARHGAP45	13	16	13	36	43	51	3	19	25	1	1	4	3	1	4	1	1	5	2	12	23	21	17	18	30	19	23	12	3	11	13	6	1	3	7	1	5	3	1	1	3	1	2	9	3	2	4	29	4
ARHGAP5	25	28	46	117	83	140	15	34	51	9	20	40	12	14	5	6	7	50	27	19	43	34	31	33	35	19	41	31	14	69	15	13	1	8	15	1	20	17	34	35	12	17	7	18	7	2	1	6	1
ARHGAP6	14	9	42	45	40	43	11	21	19	1	2	3	3	2	7	2	3	1	1	8	31	34	21	23	27	22	32	7	5	13	9	6	1	1	14	1	11	3	3	1	5	1	4	2	1	4	1	6	1
ARHGAP8	16	9	22	27	51	43	9	27	19	3	2	6	4	6	1	1	1	10	7	9	47	53	42	34	28	26	48	17	1	21	10	11	1	6	17	2	6	9	6	13	1	4	4	7	2	2	5	5	5
ARHGAP9	38	17	44	96	89	133	18	40	43	8	4	3	7	2	11	7	1	5	2	10	23	26	22	23	49	36	26	20	10	16	6	7	1	6	12	5	12	3	3	4	4	4	5	5	3	5	4	4	3
ARHGDIA	46	28	67	153	124	214	33	63	67	12	27	28	18	6	8	7	6	24	13	49	135	93	76	57	45	25	109	33	17	64	15	23	1	11	17	3	27	11	11	19	14	10	4	12	6	3	9	17	5
ARHGDIB	29	24	41	34	95	98	14	26	39	30	34	43	32	15	24	12	8	39	22	27	29	28	34	26	35	39	39	72	11	118	59	44	1	18	26	5	44	43	18	27	12	17	12	49	12	3	4	10	3
ARHGDIG	28	14	26	46	57	60	11	31	25	2	1	5	1	2	7	1	1	4	1	12	28	24	10	26	23	15	45	10	4	3	6	4	1	1	12	2	4	3	4	4	1	1	3	8	4	1	2	7	2
ARHGEF1	62	12	52	50	119	132	13	49	31	10	26	38	10	8	8	7	3	28	16	18	52	68	40	45	38	23	63	39	5	79	22	17	1	13	12	1	16	29	8	30	6	17	8	11	4	2	1	13	2
ARHGEF10	22	29	24	63	36	48	14	12	40	13	3	3	21	1	14	8	8	4	6	20	18	18	27	22	52	43	27	5	6	8	2	2	1	8	5	4	17	1	15	1	9	1	9	2	8	2	1	13	1
ARHGEF10L	16	11	16	39	27	44	9	15	16	3	3	6	1	2	3	1	1	4	2	15	24	16	18	12	18	14	28	13	4	39	6	6	1	3	11	3	3	6	4	4	4	5	2	6	2	2	2	9	6
ARHGEF11	35	13	22	39	48	88	11	27	37	4	6	18	12	1	7	1	1	7	4	14	31	19	22	27	31	20	36	38	5	41	6	7	1	7	22	1	14	22	3	22	9	6	5	9	1	4	4	6	3
ARHGEF12	16	14	38	62	74	89	11	14	29	4	7	21	10	2	8	6	3	16	16	23	52	22	26	34	38	29	55	8	19	45	9	5	1	11	14	1	16	8	10	7	9	8	4	14	9	4	3	5	3
ARHGEF15	7	10	13	51	27	46	7	9	11	1	5	6	1	1	7	1	1	3	1	14	19	21	16	22	39	31	20	12	9	5	4	3	1	1	5	2	9	2	1	2	2	5	1	6	4	1	2	9	3
ARHGEF16	18	13	22	45	57	57	15	19	20	1	1	6	4	1	7	1	2	6	3	4	38	55	38	34	27	25	46	42	8	89	22	9	1	1	18	4	13	17	2	16	1	14	2	9	2	1	7	10	1
ARHGEF17	9	14	12	36	50	41	17	10	18	3	1	1	6	2	3	2	1	3	2	11	16	23	17	14	24	16	33	9	6	7	2	1	1	7	18	1	12	3	4	3	3	1	2	5	2	1	2	5	1
ARHGEF18	16	12	28	42	45	76	10	28	27	3	9	40	5	13	3	2	1	23	14	7	37	30	26	25	28	13	33	18	5	57	12	11	1	1	15	1	8	10	9	43	6	20	3	7	3	2	6	12	2
ARHGEF19	12	13	19	39	37	46	10	10	24	1	3	6	5	1	4	2	1	3	2	6	11	9	17	15	34	17	18	8	1	7	5	6	1	2	6	1	5	1	4	2	3	2	1	3	4	2	4	10	4
ARHGEF2	60	31	67	86	133	207	20	67	49	17	23	37	9	22	7	3	2	40	19	20	79	68	54	38	34	23	75	73	14	121	29	27	1	12	39	1	19	47	17	77	10	20	3	16	3	1	4	11	1
ARHGEF25	23	15	19	62	33	62	14	22	26	4	2	3	9	1	4	1	1	3	1	13	17	12	16	12	23	26	29	9	9	10	6	4	1	2	6	1	11	6	3	4	1	2	1	4	1	6	1	6	3
ARHGEF26	18	26	15	42	39	53	44	14	47	30	4	3	40	2	31	19	21	3	1	16	11	9	11	14	76	56	32	9	5	13	3	3	1	2	8	1	11	2	19	7	15	3	7	4	1	1	2	5	1
ARHGEF28	10	10	16	52	41	39	14	14	21	5	4	15	5	6	5	1	1	10	6	8	14	16	19	21	27	21	28	8	10	17	4	6	1	5	8	1	6	4	8	3	5	2	1	7	4	1	3	9	1
ARHGEF3	13	18	29	54	56	57	11	15	33	8	6	13	6	6	7	1	3	13	10	11	25	26	26	28	42	31	29	13	3	22	12	5	1	5	8	3	2	7	3	16	4	3	1	11	3	2	4	6	5
ARHGEF33	10	12	19	38	38	42	12	10	19	3	1	1	2	1	2	1	1	2	1	6	14	10	18	14	26	25	18	6	4	8	3	1	1	2	4	1	7	3	9	3	1	1	1	3	1	1	2	3	1
ARHGEF35	22	10	32	55	64	69	7	25	29	2	6	26	2	4	7	1	4	10	2	12	34	22	18	31	25	28	51	27	5	33	18	16	1	1	25	1	13	16	5	19	6	11	2	15	4	2	2	8	1
ARHGEF37	21	20	18	50	37	49	16	16	33	1	1	5	5	1	7	1	1	4	2	16	27	13	31	25	38	38	47	6	4	20	8	3	1	3	15	1	12	1	6	3	6	4	3	6	4	5	5	11	6
ARHGEF38	30	9	36	56	80	80	15	39	25	2	9	4	4	1	2	1	1	6	3	7	49	34	36	28	27	35	60	21	8	47	17	14	1	2	16	2	4	12	6	7	1	3	1	10	4	2	1	6	1
ARHGEF39	6	10	10	28	32	32	15	14	15	1	1	1	2	1	3	1	1	1	2	13	20	8	7	13	20	14	18	6	2	10	4	2	1	5	21	2	2	1	2	5	1	2	1	2	1	3	3	3	1
ARHGEF4	19	10	11	30	27	29	5	12	20	1	1	1	2	1	1	1	1	1	1	5	10	7	5	12	12	7	8	5	1	1	2	2	1	4	10	1	2	1	3	5	1	1	1	1	3	1	1	6	1
ARHGEF40	25	20	21	63	38	53	18	23	37	16	11	17	18	2	16	14	9	20	8	20	26	22	26	22	48	34	33	8	13	13	11	3	1	15	41	1	19	6	26	3	18	4	11	6	4	5	3	9	1
ARHGEF5	39	21	42	71	100	149	19	40	38	3	19	13	5	7	5	1	1	12	5	11	45	35	34	85	36	19	61	24	10	60	19	16	1	4	18	3	9	8	7	19	4	13	3	14	4	1	5	11	2
ARHGEF6	6	8	10	28	11	23	8	3	9	1	1	1	7	1	3	4	1	2	1	12	23	20	16	11	31	27	33	1	8	6	4	3	1	2	43	1	9	1	1	1	1	1	4	4	3	1	6	5	2
ARHGEF7	35	9	14	29	58	53	15	18	24	4	10	12	13	5	4	4	1	17	10	20	34	31	27	26	37	25	44	22	8	54	10	12	1	13	14	2	11	11	15	11	2	15	2	10	7	1	1	7	4
ARHGEF9	11	11	23	36	38	42	16	10	21	1	1	8	3	1	3	1	1	1	3	17	27	26	21	30	23	26	34	7	7	12	7	4	1	5	8	2	5	2	6	1	3	1	2	4	1	1	3	6	1
ARID1A	23	17	23	39	42	71	15	22	33	4	4	9	3	4	5	1	1	4	6	8	21	30	19	13	24	11	29	15	3	38	13	7	1	5	16	1	4	7	8	11	6	3	1	3	3	2	3	3	1
ARID1B	18	30	26	48	60	64	20	19	28	5	15	18	8	4	7	6	3	29	6	18	49	43	31	43	49	33	58	26	8	58	7	10	1	11	21	2	9	15	13	19	13	8	2	14	5	1	3	6	2
ARID2	21	18	14	42	40	53	11	15	20	4	6	15	5	1	9	4	3	14	8	15	30	35	44	34	42	29	49	18	11	38	13	9	1	5	40	3	7	15	10	8	10	8	6	9	6	1	2	7	1
ARID3A	5	11	13	34	31	39	44	17	15	2	2	1	3	1	6	1	1	5	1	9	19	18	12	23	34	20	37	12	4	8	10	2	1	1	7	2	9	3	2	2	1	2	2	2	3	2	4	6	1
ARID3B	13	13	14	48	46	62	19	13	21	2	1	1	2	1	2	2	1	4	1	10	11	14	11	21	32	22	29	9	5	18	6	5	1	3	10	3	11	1	2	10	2	4	2	4	2	1	1	7	3
ARID3C	12	10	9	36	19	34	5	13	19	1	2	2	2	1	1	1	2	1	3	8	14	10	13	18	20	14	26	5	4	4	3	1	1	1	12	2	2	1	7	1	1	2	3	2	2	1	1	6	5
ARID4A	7	8	15	49	34	49	6	13	21	2	6	7	6	2	5	1	1	5	1	10	24	17	22	23	41	26	30	15	4	22	4	5	1	1	13	3	5	5	4	2	2	2	3	6	1	2	2	4	1
ARID4B	32	6	25	41	65	92	13	36	30	2	7	10	6	1	5	1	3	8	6	20	31	18	21	30	35	18	38	35	11	62	12	16	1	4	10	1	10	7	4	11	6	7	2	10	4	6	2	7	4
ARID5A	16	16	15	50	63	55	21	18	27	6	1	4	22	3	21	13	9	6	1	14	16	23	17	15	25	28	22	12	8	13	8	4	1	7	7	1	5	4	9	4	7	7	6	8	5	2	1	4	2
ARID5B	13	12	17	46	35	41	18	20	30	4	4	5	7	2	4	2	2	4	1	12	21	13	20	19	25	14	40	10	15	26	4	6	1	3	12	1	12	8	14	2	2	4	9	10	3	2	2	6	2
ARIH1	36	10	28	69	74	114	11	27	31	5	5	12	22	7	15	7	5	14	7	26	49	26	38	39	50	49	57	16	15	44	20	9	1	13	20	3	15	15	13	19	8	16	6	14	7	3	2	6	3
ARIH2	15	14	28	52	76	97	23	19	26	10	8	22	9	6	11	3	2	11	3	18	43	26	34	33	39	25	49	27	15	51	14	11	1	7	12	2	18	18	15	19	8	9	4	16	3	1	4	6	1
ARIH2OS	11	7	20	43	40	48	11	10	21	1	2	4	3	1	6	1	1	3	1	17	23	15	14	6	23	25	29	5	7	6	3	1	1	7	9	2	5	1	6	3	1	2	1	5	2	3	1	6	3
ARL1	16	15	21	63	63	74	10	24	23	2	6	2	4	2	9	4	1	9	5	13	48	30	22	28	21	26	51	12	6	28	8	9	1	3	34	2	13	15	14	6	5	5	1	11	8	8	1	13	3
ARL10	25	21	27	70	56	78	15	33	39	2	1	4	3	1	3	1	1	1	1	9	21	15	19	19	35	20	31	10	9	9	6	6	1	2	6	2	13	8	12	1	2	3	2	9	5	2	2	5	1
ARL11	15	10	22	29	33	42	14	18	16	1	3	2	2	1	3	1	1	2	2	13	16	16	17	19	23	35	25	6	3	5	2	4	1	4	8	2	2	1	3	6	2	1	2	3	4	1	2	8	2
ARL13A	9	8	13	27	39	31	7	14	7	1	4	2	1	1	1	1	2	1	1	6	16	13	8	22	26	14	21	5	5	5	3	4	1	2	14	1	5	2	4	1	2	1	2	5	1	4	4	13	2
ARL13B	10	13	22	39	33	53	15	15	27	4	2	1	6	4	9	9	1	1	2	9	27	17	22	29	35	24	31	7	11	8	9	5	1	6	7	6	9	1	10	2	6	1	5	3	3	2	4	6	1
ARL14	31	8	39	54	60	130	16	26	26	1	13	62	3	42	1	2	1	20	4	15	44	25	20	39	34	29	31	12	7	35	21	12	1	4	12	1	7	9	5	21	4	5	2	13	1	4	1	5	1
ARL14EP	6	10	17	27	31	28	8	8	18	1	1	4	3	1	6	1	1	5	1	7	13	11	16	17	16	18	22	6	2	14	3	3	1	3	9	2	3	3	4	1	1	1	1	3	1	3	2	2	4
ARL14EPL	19	15	14	42	42	61	7	18	18	1	1	1	4	1	5	1	1	2	1	10	17	21	23	18	27	18	24	6	6	4	3	2	1	1	33	2	7	1	4	4	3	1	2	5	1	1	3	4	1
ARL15	23	16	24	40	48	58	14	28	22	8	6	3	4	1	6	3	3	2	1	12	24	12	24	19	30	21	41	21	5	33	5	3	1	15	13	3	8	10	3	9	5	9	1	14	8	5	2	3	1
ARL16	9	12	13	23	41	44	11	13	17	1	4	7	4	1	3	1	1	4	1	11	17	17	14	13	28	27	21	13	8	12	6	2	1	6	11	1	5	2	5	3	3	2	1	2	3	1	3	7	3
ARL17B	11	14	17	41	46	35	9	14	26	5	3	3	2	3	3	1	1	4	3	8	22	16	17	21	38	35	34	5	4	8	5	7	1	7	5	2	6	3	5	4	3	3	4	6	3	4	2	7	1
ARL2	184	86	196	330	418	552	91	150	170	10	18	23	12	5	14	4	6	18	10	44	82	66	92	79	59	45	150	34	16	53	18	23	1	21	24	7	28	25	16	15	6	21	7	29	20	7	11	5	6
ARL2BP	17	9	25	46	45	49	14	15	33	15	5	9	12	2	10	3	4	6	4	19	36	23	20	29	34	19	37	16	6	31	10	6	1	3	20	1	10	9	11	9	6	6	4	8	12	2	3	12	3
ARL3	11	7	11	25	34	40	10	15	18	2	1	1	1	1	2	3	3	2	1	4	6	6	11	9	17	14	20	4	7	7	5	1	1	2	7	1	12	1	5	4	3	1	1	5	3	3	1	6	1
ARL4A	32	27	32	67	75	88	17	24	29	5	18	23	10	4	9	3	1	11	7	12	41	25	46	35	35	40	38	31	8	48	23	11	1	10	12	2	15	7	11	13	6	15	6	6	7	2	4	7	1
ARL4C	17	13	28	44	58	117	12	17	26	3	4	7	2	2	7	2	4	8	8	17	13	14	28	25	44	30	32	11	5	7	3	11	1	7	8	1	7	1	12	6	8	9	3	6	2	2	6	5	1
ARL4D	14	17	18	46	37	34	8	20	20	4	4	4	3	3	5	1	1	6	4	16	28	17	21	18	33	25	25	5	7	18	3	5	1	8	6	1	6	4	7	3	5	1	4	3	3	4	3	7	1
ARL5A	14	16	20	53	52	52	10	15	20	4	6	1	9	3	6	1	1	8	3	10	27	12	17	22	28	15	32	8	5	16	6	7	1	2	14	1	8	5	6	6	4	2	2	3	4	1	1	9	1
ARL5B	21	13	19	52	48	60	15	13	26	5	12	23	9	12	6	1	1	40	16	16	18	21	20	24	30	25	20	15	7	36	12	8	1	5	26	1	7	6	3	19	3	9	7	7	2	4	2	9	1
ARL5C	11	12	13	47	29	39	10	15	24	1	2	1	8	1	2	1	1	1	2	8	24	12	16	23	47	23	32	7	3	5	4	5	1	2	3	2	3	1	3	1	2	4	1	7	2	2	3	8	2
ARL6	14	14	9	25	15	19	12	5	17	2	1	1	3	1	5	1	3	2	1	6	13	8	13	19	17	14	19	4	2	2	1	2	1	1	8	1	5	2	6	1	3	1	2	3	2	2	1	5	4
ARL6IP1	55	14	51	46	129	170	17	53	23	8	27	26	9	6	5	4	2	31	15	21	151	88	83	88	29	21	156	68	8	73	66	37	1	7	28	1	11	23	6	37	6	10	6	30	5	7	8	13	1
ARL6IP4	37	26	60	149	119	108	20	41	57	13	16	20	19	8	16	9	10	27	10	32	86	60	39	36	51	41	87	59	16	114	36	28	1	11	48	2	29	35	29	28	15	14	7	38	14	4	5	9	1
ARL6IP5	23	33	21	105	60	105	18	18	40	14	30	28	14	16	7	10	7	37	26	31	66	43	34	49	39	22	61	27	8	63	7	48	1	7	17	2	25	20	13	14	14	21	5	20	9	4	5	3	5
ARL6IP6	18	22	23	53	40	58	22	17	25	3	11	21	7	5	5	3	4	17	10	18	42	27	28	37	28	23	34	9	11	21	9	18	1	4	20	1	10	5	21	13	4	4	4	11	1	3	1	7	2
ARL8A	56	43	143	173	248	293	50	71	74	4	14	22	14	10	7	5	3	24	12	36	80	75	65	55	49	36	120	69	17	88	29	28	1	9	16	1	24	26	20	25	7	16	11	14	5	2	4	10	3
ARL8B	18	16	28	81	46	87	17	24	31	10	9	7	12	7	14	6	4	19	12	15	30	31	29	32	29	21	36	17	10	52	9	16	1	9	18	1	14	16	19	20	5	20	4	12	2	1	1	5	2
ARL9	13	11	14	42	40	34	8	9	26	1	2	1	1	1	3	1	1	1	1	10	16	14	14	24	21	20	43	4	5	9	3	3	1	1	7	2	4	1	4	4	2	1	1	4	2	3	3	4	1
ARMC1	12	4	31	36	37	61	11	19	31	3	3	9	4	1	3	2	2	4	1	7	17	20	11	19	26	28	38	9	4	12	7	4	1	2	6	1	6	2	4	1	3	3	1	8	3	1	2	6	3
ARMC10	22	14	23	53	50	63	11	31	24	3	5	16	2	3	4	2	4	15	5	13	25	24	24	22	27	20	30	11	3	21	8	9	1	5	15	1	6	6	3	5	1	6	2	3	3	2	7	7	4
ARMC12	13	10	21	44	42	43	4	12	20	1	1	3	3	1	3	1	1	1	1	9	27	15	19	21	36	19	18	10	8	8	4	4	1	1	8	1	8	1	6	2	1	1	3	1	3	2	3	4	1
ARMC2	11	14	16	65	54	60	16	15	28	7	4	3	4	2	7	1	1	2	1	14	21	17	20	19	43	26	33	12	10	17	10	3	1	3	5	6	14	1	5	4	3	4	1	4	1	1	5	10	3
ARMC3	14	15	20	42	42	33	11	18	21	2	1	1	3	1	1	2	3	1	1	13	14	31	15	21	25	14	24	9	3	8	8	7	1	2	7	1	5	1	1	3	2	1	3	4	1	3	4	7	4
ARMC5	10	13	20	46	31	49	8	15	23	1	1	4	2	2	5	1	1	3	1	14	20	20	21	23	39	24	34	13	6	9	3	5	1	1	7	1	9	4	8	2	3	1	1	5	2	4	4	10	5
ARMC6	17	9	20	34	25	41	27	12	14	1	1	3	2	1	2	3	1	1	1	13	21	26	16	17	31	19	23	9	2	18	3	4	1	3	9	1	4	4	5	6	1	2	3	7	1	1	1	4	2
ARMC7	13	12	11	42	52	48	31	20	24	1	6	8	2	6	3	3	3	8	3	12	28	22	29	31	31	34	43	11	10	13	5	4	1	4	9	3	6	4	5	5	2	1	3	7	9	2	4	7	1
ARMC8	24	20	31	56	81	89	22	16	32	4	9	14	15	6	10	3	2	8	4	21	40	35	34	31	48	26	61	19	13	40	18	10	1	6	23	1	15	13	16	19	11	10	4	16	7	3	6	15	3
ARMC9	17	19	26	46	66	54	15	17	32	1	4	3	3	1	8	1	1	2	1	16	29	19	19	21	32	27	32	11	5	15	5	8	1	6	10	2	7	7	11	6	2	3	6	8	2	1	1	7	4
ARMCX1	16	16	19	53	40	55	13	15	27	2	3	7	8	1	10	2	4	6	3	18	13	17	21	21	43	29	27	3	8	8	8	7	1	5	5	1	14	1	10	1	3	3	3	6	4	4	1	14	1
ARMCX2	13	13	10	38	23	35	16	16	31	1	1	1	2	1	3	3	2	1	3	9	20	7	20	18	34	20	22	3	13	13	2	3	1	5	7	1	8	1	5	5	2	1	2	5	4	4	1	4	3
ARMCX3	20	14	31	59	81	92	16	23	49	6	1	11	8	1	4	3	1	15	4	16	35	15	23	23	30	23	33	11	8	23	3	8	1	6	9	2	17	5	8	7	7	1	3	4	4	5	5	6	5
ARMCX4	21	9	14	42	44	43	12	12	25	3	8	7	5	3	1	1	2	1	2	7	22	20	18	17	40	40	29	7	7	7	3	3	1	4	9	2	8	3	3	2	8	3	6	8	4	2	4	6	3
ARMCX5	9	12	25	18	45	38	7	8	23	1	1	3	1	2	3	4	1	1	2	5	17	13	19	19	27	23	16	11	11	8	5	2	1	2	11	1	3	3	5	2	3	1	2	6	1	2	2	7	4
ARMCX6	17	12	14	42	57	62	13	15	35	4	3	5	12	2	4	2	1	7	6	11	30	23	21	27	30	17	28	8	6	15	6	7	1	4	6	3	10	8	4	2	6	4	5	7	4	1	4	6	3
ARMH1	9	14	13	31	36	33	8	15	22	1	1	1	4	1	3	1	1	2	1	7	20	15	13	20	36	33	18	8	11	11	5	8	1	1	9	2	4	2	3	5	1	1	1	2	1	4	3	3	1
ARMH2	11	9	19	30	35	30	8	13	20	1	1	1	2	2	3	2	4	1	1	8	21	13	18	21	27	24	32	7	8	12	5	3	1	1	16	3	4	2	5	5	1	3	3	2	3	1	5	5	1
ARMH3	15	12	18	35	30	41	7	14	17	5	2	4	4	1	6	1	2	1	2	12	18	17	22	20	22	23	25	4	1	16	4	3	1	6	8	1	8	7	6	6	1	3	1	3	2	2	1	8	1
ARMH4	15	8	5	29	31	33	4	8	13	1	2	1	1	1	3	1	2	1	1	11	8	12	11	12	21	28	23	9	3	7	1	1	1	1	6	5	1	1	3	2	1	1	1	4	3	3	4	4	1
ARMS2	11	7	13	30	25	25	10	8	10	1	2	3	1	1	2	1	3	1	1	11	9	11	12	13	31	15	23	1	7	6	3	3	1	2	27	1	6	1	5	1	1	2	2	1	1	3	1	6	3
ARMT1	7	12	12	25	27	42	11	7	22	1	3	1	3	1	2	1	2	1	2	8	18	22	21	23	22	14	37	8	4	10	4	6	1	1	26	1	2	1	8	4	1	3	1	4	2	2	1	7	1
ARNT	5	7	14	39	31	37	5	10	14	5	4	2	2	1	5	1	1	3	3	7	11	23	15	19	29	13	15	17	7	25	5	8	1	4	12	1	7	7	5	7	4	5	1	3	4	1	1	3	1
ARNT2	14	9	15	32	33	26	9	18	22	1	2	1	5	1	5	1	1	3	2	10	18	22	19	16	37	28	45	7	5	12	7	6	1	4	67	3	9	1	2	3	2	4	8	5	6	2	6	13	1
ARNTL	8	15	20	27	23	45	8	13	26	4	2	1	4	2	5	2	1	3	3	9	20	18	11	17	31	28	27	4	7	5	3	1	1	4	9	1	9	2	3	4	4	2	1	3	3	1	1	2	1
ARNTL2	15	7	23	37	50	69	12	22	21	3	9	6	1	4	3	2	1	3	7	5	25	21	28	22	21	22	30	5	4	19	4	20	1	3	11	1	4	6	5	14	4	15	1	3	4	2	3	7	1
ARPC1A	23	28	25	68	79	115	14	32	28	8	12	19	13	19	9	6	7	21	11	21	70	43	35	38	33	16	47	51	19	97	24	17	1	15	33	3	20	19	17	22	5	25	1	14	8	1	3	9	1
ARPC1B	59	39	63	98	156	202	17	55	71	30	40	60	26	27	20	10	10	48	26	35	138	107	92	76	58	39	112	89	18	212	54	73	1	14	56	2	44	58	39	62	14	33	11	39	10	4	21	10	5
ARPC2	33	14	40	72	109	136	16	44	37	12	26	30	14	11	14	9	5	35	10	18	88	75	49	56	24	17	82	32	7	76	13	25	1	4	13	3	24	18	19	27	8	14	5	28	7	5	42	36	11
ARPC3	70	31	106	114	223	285	23	65	62	13	10	33	17	15	12	14	3	35	16	29	181	80	61	74	46	31	123	58	7	130	61	40	1	8	29	1	20	21	25	34	11	27	7	36	17	5	1	7	1
ARPC4	36	28	45	92	114	135	28	35	41	10	23	27	17	17	13	4	7	37	12	33	73	56	51	53	37	29	73	45	13	108	36	43	1	15	28	2	15	33	23	35	11	26	4	29	9	3	2	7	3
ARPC5	55	23	58	111	141	180	15	57	47	22	40	55	14	16	10	8	6	40	27	32	86	54	45	54	31	14	71	57	10	137	31	45	1	13	25	1	20	31	14	40	12	18	4	24	10	1	6	12	8
ARPC5L	17	10	39	56	67	66	14	16	17	6	17	14	5	6	5	6	1	17	6	9	62	40	43	46	25	18	56	25	4	46	13	16	1	13	7	1	2	13	14	21	4	10	3	13	7	3	3	8	3
ARPIN	21	16	20	39	53	47	12	19	21	2	6	2	7	4	3	2	3	6	2	17	18	26	22	18	32	22	43	11	4	10	8	3	1	4	17	4	5	5	10	2	2	3	2	6	4	2	3	9	1
ARPP19	18	21	27	88	64	105	10	25	33	12	7	16	7	6	6	9	4	26	7	15	41	16	26	29	19	21	37	26	13	51	9	14	1	6	27	1	23	13	20	18	10	12	7	7	7	2	3	5	1
ARPP21	7	2	10	25	20	29	8	8	15	1	1	1	2	1	3	1	1	1	1	7	12	13	13	10	20	24	17	4	5	3	4	6	1	2	13	1	4	1	1	2	2	1	1	2	1	2	1	7	2
ARR3	8	15	21	26	28	44	10	12	25	1	1	1	4	1	6	2	1	3	1	12	22	11	16	16	26	33	35	10	5	4	2	3	1	2	7	3	3	2	3	1	2	1	3	8	4	2	3	10	2
ARRB1	18	13	16	47	47	51	8	23	26	6	11	7	4	3	8	1	1	7	4	9	35	22	17	26	37	18	42	14	7	25	12	7	1	7	13	3	8	5	5	7	2	2	3	3	4	1	6	6	1
ARRB2	11	14	25	60	51	60	16	14	33	4	3	3	9	2	8	1	3	5	5	9	16	11	21	12	31	24	29	11	3	19	8	3	1	4	16	2	8	4	5	12	2	1	6	9	6	1	3	7	3
ARRDC1	172	94	282	226	614	927	75	175	132	13	35	54	8	28	7	9	4	61	27	26	140	118	90	76	51	33	138	82	8	186	48	35	1	16	38	3	15	57	20	49	9	26	6	36	3	2	11	22	1
ARRDC2	16	12	24	23	62	104	8	15	23	2	2	4	2	1	4	1	1	4	1	10	16	15	15	22	35	18	24	6	5	18	9	7	1	3	28	1	5	10	8	10	4	1	2	9	1	3	3	8	1
ARRDC3	14	11	17	60	40	61	8	11	26	13	11	33	24	6	7	11	5	28	10	29	27	12	31	27	21	16	47	32	12	43	6	22	1	8	12	2	21	7	21	6	12	10	4	18	3	1	5	1	1
ARRDC4	21	22	24	68	43	86	15	20	62	5	9	4	14	4	8	10	6	6	2	28	30	35	24	22	32	38	34	25	39	64	27	7	1	9	22	3	33	21	8	18	6	7	5	14	9	8	4	9	1
ARRDC5	9	14	7	34	19	29	12	13	16	1	1	2	1	1	4	1	1	1	1	7	21	15	19	16	24	23	26	7	2	7	3	1	1	2	3	4	1	4	4	3	1	2	1	4	3	1	1	8	2
ARSA	18	5	18	51	58	62	5	16	23	1	1	1	3	1	6	1	1	2	2	12	20	20	18	27	25	26	35	9	5	14	7	11	1	7	34	1	11	5	7	3	3	3	2	4	1	1	8	7	2
ARSB	16	12	16	28	41	29	6	8	14	3	1	1	5	1	5	2	1	1	2	8	12	10	4	4	15	15	18	6	2	8	4	5	1	2	4	1	2	2	2	2	1	2	4	5	2	1	2	5	2
ARSD	26	16	33	49	59	70	17	19	18	4	15	13	7	4	6	2	3	16	14	16	42	22	25	32	37	21	36	15	6	17	9	5	1	4	13	1	10	4	5	2	5	5	3	11	6	2	2	8	3
ARSF	29	11	21	40	61	73	13	21	29	3	1	1	2	1	7	1	1	2	1	12	15	22	13	14	25	34	40	5	11	9	5	4	1	2	3	2	5	1	1	1	1	1	1	2	3	3	1	3	3
ARSG	14	9	10	37	34	55	12	14	32	1	1	4	6	3	5	2	1	1	1	7	15	16	31	19	43	23	42	5	6	13	8	4	1	6	4	2	7	6	2	2	1	1	6	5	1	1	1	6	1
ARSH	12	6	10	48	41	23	13	15	24	2	1	2	2	1	1	2	1	6	2	6	14	13	19	18	16	15	23	6	2	5	3	1	1	3	12	2	1	2	2	1	1	2	1	5	1	1	2	6	2
ARSI	10	15	14	43	23	32	17	8	23	3	1	1	4	1	6	3	4	4	3	9	20	11	12	15	22	33	24	3	5	7	5	3	1	2	11	2	8	1	7	3	2	1	3	3	3	4	1	1	1
ARSJ	10	11	16	37	33	57	8	8	10	2	2	1	2	1	4	1	1	1	1	7	19	12	13	11	23	18	21	9	7	7	2	2	1	4	8	2	4	2	4	4	2	1	1	4	3	5	3	6	1
ARSK	20	8	12	35	32	42	7	11	19	1	1	1	4	1	4	3	1	1	1	17	23	14	14	19	21	21	24	11	4	8	9	1	1	2	5	1	1	2	7	1	1	2	4	2	2	4	2	6	1
ARSL	24	19	29	55	57	74	24	22	35	3	1	2	11	3	5	1	1	3	2	13	26	22	19	22	26	32	37	10	6	9	7	3	1	6	15	3	6	3	6	3	3	3	6	2	2	4	3	2	1
ART1	21	9	28	47	42	65	12	25	20	1	1	2	2	1	2	1	1	2	2	11	23	22	18	22	40	30	28	11	3	16	2	2	1	5	9	2	4	2	3	4	1	1	2	1	1	1	2	10	3
ART3	17	16	17	33	36	39	12	12	28	3	1	1	6	1	6	3	4	1	2	10	16	16	7	16	34	19	17	6	4	7	3	4	1	1	7	1	2	4	7	2	4	1	2	4	4	3	4	7	1
ART4	7	6	12	26	15	19	5	7	15	1	5	2	2	1	7	1	1	1	1	11	16	10	13	16	30	14	24	5	7	6	5	3	1	1	17	1	4	1	1	2	1	1	2	1	1	1	1	9	1
ART5	20	11	21	52	60	73	14	14	38	2	1	4	4	1	2	1	1	1	2	5	15	18	24	12	33	22	31	7	7	13	10	3	1	7	9	2	8	3	3	5	2	1	5	5	5	2	2	10	2
ARTN	16	12	23	27	46	54	11	16	17	1	1	2	3	1	2	1	2	2	1	13	11	17	11	19	12	21	33	1	5	10	7	2	1	7	6	2	7	1	3	3	1	1	1	6	5	1	2	3	2
ARV1	16	12	24	37	61	41	5	16	17	1	3	8	1	3	3	1	2	8	3	11	18	29	19	19	22	16	36	15	7	17	9	4	1	4	13	1	5	4	7	8	3	1	4	8	1	1	1	7	1
ARVCF	11	8	16	29	37	54	6	10	17	7	1	2	4	3	6	3	1	1	1	10	24	22	20	18	31	35	35	16	6	23	5	13	1	7	8	3	5	5	5	13	2	7	2	3	2	2	3	9	4
ARX	5	8	22	45	32	51	12	8	24	2	1	1	1	1	3	1	1	1	1	14	18	20	19	16	22	23	30	7	2	9	11	3	1	3	8	3	3	1	7	3	2	1	4	7	2	1	3	6	3
AS3MT	14	11	18	43	50	63	11	18	16	1	1	1	4	1	5	1	1	2	1	11	19	20	18	14	18	14	21	13	3	8	5	2	1	1	10	2	6	1	3	1	1	2	2	4	2	1	2	7	1
ASAH1	21	23	26	67	60	74	11	35	44	7	7	10	14	9	4	8	3	15	11	24	59	25	40	39	44	21	43	22	11	51	25	15	1	6	21	1	18	16	12	6	14	10	2	29	11	6	4	6	5
ASAH2B	20	20	23	47	57	56	10	22	23	5	7	6	3	2	7	2	2	6	4	16	27	17	33	31	46	34	40	15	7	21	13	4	1	4	16	1	12	9	4	10	3	5	3	5	2	4	2	3	3
ASAP1	15	15	24	50	62	82	9	21	31	4	11	6	6	5	7	4	3	19	7	5	15	30	27	26	31	28	29	17	17	28	8	5	1	4	16	3	14	5	15	9	7	11	4	11	7	3	3	14	2
ASAP2	16	17	35	47	82	105	14	30	26	5	15	34	5	7	11	5	4	35	7	16	65	50	43	46	29	24	51	25	4	58	17	21	1	3	14	1	16	11	6	30	9	10	2	14	11	1	3	11	1
ASAP3	13	17	26	50	39	68	15	18	32	4	3	4	7	1	4	1	3	3	1	14	25	19	16	30	27	39	42	11	6	12	8	2	1	2	17	1	8	3	5	3	3	2	4	4	2	3	1	8	2
ASB1	20	12	16	64	47	68	19	17	24	4	4	7	5	4	7	3	1	7	4	12	36	34	23	21	26	25	39	8	7	25	12	6	1	7	13	2	6	2	10	3	2	6	1	7	3	4	6	10	2
ASB10	10	16	18	37	35	47	14	13	26	2	1	3	2	1	6	3	3	1	1	6	24	24	21	26	40	28	30	5	8	7	8	3	1	1	20	3	8	1	7	7	5	2	2	5	2	2	7	2	3
ASB11	16	13	15	36	47	24	15	10	28	1	1	4	3	1	2	1	1	1	1	7	15	16	20	18	29	24	22	12	5	7	4	3	1	3	8	5	3	1	10	5	1	1	4	2	3	1	2	5	1
ASB12	9	13	19	44	38	48	8	18	20	1	2	2	1	2	7	1	1	2	1	7	18	21	15	26	38	27	30	11	7	11	5	3	1	1	11	1	5	1	5	2	1	1	1	3	1	2	2	8	2
ASB13	15	9	14	32	26	40	7	13	16	1	3	2	3	1	6	1	1	8	1	5	14	14	24	20	29	15	31	9	2	17	7	3	1	1	10	1	2	7	10	5	3	1	1	6	3	1	1	4	5
ASB14	7	3	14	19	24	29	12	7	14	1	2	3	3	3	2	2	1	1	3	6	8	9	10	9	15	20	23	7	6	5	4	1	1	1	3	1	4	1	2	1	1	2	1	1	1	1	2	3	2
ASB15	7	6	12	24	29	24	6	13	11	2	2	3	2	1	8	1	1	1	1	7	18	15	17	15	23	17	24	7	1	4	5	1	1	2	9	1	4	1	3	2	4	2	3	2	1	3	5	9	1
ASB16	10	9	13	38	44	47	12	9	24	1	2	4	4	1	4	1	1	1	1	11	19	10	18	27	24	21	18	5	2	10	2	3	1	1	11	2	6	4	4	4	1	1	1	5	2	3	2	4	1
ASB17	9	6	11	41	30	48	16	10	17	1	1	1	3	1	5	1	1	1	1	6	7	13	10	19	39	31	18	6	4	5	4	5	1	1	11	2	5	1	7	3	2	5	1	3	1	2	3	6	1
ASB18	12	13	18	41	28	42	12	17	22	1	2	3	5	1	1	1	1	3	1	18	22	17	16	16	41	21	36	4	6	8	5	6	1	4	6	1	3	1	3	4	2	1	1	3	3	2	2	8	1
ASB2	11	8	17	40	53	39	11	13	24	1	2	2	4	1	11	1	1	1	1	6	12	8	13	22	24	15	22	5	6	9	1	5	1	4	10	1	3	1	1	1	2	1	4	2	3	3	1	7	2
ASB3	12	8	16	35	38	36	13	13	21	1	5	2	6	1	8	2	1	5	2	10	17	13	24	18	17	13	31	11	4	15	9	1	1	6	9	3	5	3	1	3	1	1	2	5	4	3	5	4	3
ASB4	13	11	16	36	39	54	11	9	26	3	2	1	3	1	5	1	2	2	1	11	13	12	23	18	19	16	23	9	3	16	5	2	1	2	5	3	6	3	5	1	2	2	2	6	3	1	1	2	1
ASB5	7	17	15	36	33	45	13	10	14	5	2	1	3	1	4	1	1	1	1	11	26	19	15	22	27	15	17	8	3	4	4	4	1	5	7	1	4	1	2	3	3	1	1	6	4	1	1	5	1
ASB6	21	16	25	37	54	86	9	15	38	6	10	9	5	3	1	4	1	9	5	9	32	22	38	23	43	19	44	12	7	32	7	13	1	4	8	1	13	7	9	11	6	6	3	9	3	3	1	4	1
ASB7	8	12	7	40	23	25	8	8	23	1	3	2	1	1	1	1	1	2	1	7	14	12	13	15	32	27	27	9	6	5	6	2	1	1	5	1	6	1	1	2	1	1	1	1	2	2	2	8	2
ASB8	11	13	17	44	38	47	8	12	16	2	7	7	2	3	4	1	1	1	1	16	23	18	18	29	42	30	40	17	4	20	8	8	1	4	10	1	6	7	2	4	5	2	4	5	2	4	3	7	1
ASB9	8	9	14	36	35	37	9	13	8	1	2	3	2	1	3	1	1	2	1	5	21	13	27	25	24	17	19	6	7	3	6	3	1	3	5	2	5	2	1	2	2	1	2	5	2	3	3	3	3
ASCC1	18	12	21	36	60	43	11	17	29	2	1	2	1	1	1	2	2	7	4	16	18	21	17	23	33	21	28	19	7	18	15	8	1	5	12	1	9	6	8	5	4	4	6	4	2	1	1	6	3
ASCC2	17	9	12	45	37	32	7	9	22	1	1	1	8	3	2	1	2	5	1	11	13	18	16	18	25	24	26	9	7	14	9	6	1	4	5	1	3	3	1	1	1	1	4	3	1	3	1	4	2
ASCC3	11	12	18	38	40	42	13	12	26	2	5	11	10	1	5	1	3	8	2	9	25	21	22	22	27	25	35	19	10	26	15	9	1	2	20	2	9	10	6	3	5	4	7	4	4	4	2	11	3
ASCL1	10	7	12	33	35	28	7	8	12	2	1	1	1	1	2	1	3	2	1	17	13	11	5	15	20	20	17	4	5	3	3	2	1	1	15	2	3	1	3	2	1	1	1	1	1	2	5	5	1
ASCL2	13	9	15	35	35	47	9	11	21	1	2	3	3	1	2	1	1	2	1	5	18	16	18	20	34	25	27	6	5	12	4	4	1	4	6	1	5	1	4	1	3	2	2	3	1	3	6	4	3
ASCL3	12	13	26	44	42	51	10	14	16	1	1	3	5	1	4	1	1	1	1	10	14	11	10	23	25	13	21	5	1	5	7	5	1	3	2	2	2	2	3	4	1	1	1	2	1	1	2	8	4
ASCL4	17	3	21	43	38	52	13	16	21	1	1	2	1	2	1	1	1	1	1	10	18	20	19	26	32	26	27	6	6	8	6	1	1	3	7	4	2	4	4	4	2	2	3	3	1	4	5	5	2
ASCL5	20	14	9	36	36	40	12	15	13	2	2	3	3	1	2	1	1	6	2	7	15	11	23	12	36	25	30	9	3	10	14	6	1	4	7	1	5	2	1	6	3	6	1	3	3	2	4	8	1
ASDURF	13	8	17	44	43	46	14	26	28	2	5	1	1	1	4	6	3	4	1	9	19	19	20	16	31	25	41	6	5	15	11	6	1	4	8	1	10	4	13	7	3	3	4	9	5	1	4	7	3
ASF1A	33	9	11	52	46	54	9	14	22	2	3	5	1	2	4	3	1	5	1	8	18	23	23	27	38	32	24	11	11	20	13	2	1	4	15	2	12	2	6	3	1	1	2	5	3	2	5	9	4
ASF1B	14	11	26	39	47	42	7	10	15	1	4	6	4	1	7	1	1	2	1	6	15	8	10	20	24	20	24	7	5	7	5	5	1	3	8	2	4	3	5	5	3	3	1	4	2	3	3	5	2
ASGR1	10	17	39	46	36	45	12	17	23	1	1	1	4	1	3	1	1	2	1	12	14	12	13	17	24	26	25	3	5	8	5	6	1	1	13	1	2	1	3	4	1	3	2	5	1	1	1	5	2
ASGR2	21	13	27	62	56	66	16	26	28	2	1	5	2	1	1	1	2	1	1	10	10	16	19	16	30	34	31	6	6	4	6	4	1	6	4	1	6	1	1	2	2	1	1	1	1	1	2	4	1
ASH1L	23	19	23	51	67	69	14	22	24	9	11	21	7	5	9	4	1	26	13	19	31	33	31	22	30	30	36	34	11	60	17	10	1	9	21	1	17	21	9	20	5	14	4	15	5	1	3	3	3
ASH2L	14	14	29	41	73	101	9	13	27	2	2	14	7	1	6	1	4	11	1	17	28	25	25	27	32	22	35	15	3	28	13	6	1	6	20	1	6	7	5	3	5	5	2	6	4	1	3	8	3
ASIC1	22	23	23	44	51	75	25	18	32	2	4	2	6	1	3	1	1	5	1	13	36	12	28	31	29	20	37	11	3	9	3	3	1	2	11	2	9	4	3	1	3	1	4	4	4	1	5	4	2
ASIC2	13	10	15	40	47	60	14	12	35	1	2	3	1	1	6	1	1	3	2	12	17	23	12	20	29	26	28	6	8	9	4	1	1	5	23	2	3	1	4	4	1	2	1	4	3	4	1	5	1
ASIC3	19	14	20	54	39	63	9	19	27	4	2	7	1	1	4	2	2	1	1	11	21	28	27	30	26	17	25	11	7	8	6	4	1	5	19	2	4	2	7	1	3	5	1	4	3	4	1	14	2
ASIC4	16	12	18	43	37	37	13	14	22	1	1	3	1	1	4	1	1	2	1	6	15	7	14	21	21	23	19	7	5	4	6	2	1	1	8	1	6	2	1	1	2	4	1	4	1	5	1	4	4
ASIC5	7	9	14	41	38	43	8	14	19	1	1	1	1	1	4	3	1	2	1	8	16	10	17	19	25	26	24	9	3	5	6	3	1	1	13	1	9	3	3	3	2	1	3	3	5	3	4	7	1
ASIP	12	6	10	45	26	30	12	13	20	1	1	2	3	1	1	1	1	1	1	5	18	8	13	19	35	18	23	6	4	7	1	2	1	3	11	1	5	1	6	1	5	1	1	2	3	3	3	6	1
ASL	62	16	49	70	103	150	25	55	55	2	30	21	9	15	5	7	4	13	5	24	100	67	53	52	39	28	79	106	16	160	50	32	1	7	34	2	22	32	12	51	6	8	3	19	7	3	3	5	1
ASMT	11	13	12	29	48	42	12	17	19	1	1	2	2	1	2	1	1	1	1	12	16	17	18	17	33	20	20	4	2	7	4	6	1	1	7	1	6	1	5	1	4	1	2	4	1	1	1	2	1
ASMTL	11	6	10	35	24	41	9	10	24	5	1	4	7	3	8	3	1	2	1	15	14	22	23	23	39	32	29	8	9	15	8	2	1	5	9	2	8	3	11	4	4	5	2	1	3	1	7	6	4
ASNS	18	11	18	51	51	57	14	20	19	2	1	5	6	1	3	3	5	3	2	22	24	30	25	20	32	21	23	8	7	17	8	14	1	2	14	2	7	6	5	8	5	3	1	11	4	4	3	4	1
ASNSD1	11	10	18	48	40	35	16	11	28	4	4	2	7	1	6	4	1	6	4	7	30	20	15	15	29	17	27	5	6	17	3	2	1	5	14	1	4	3	5	1	5	5	3	3	3	1	1	2	3
ASPA	8	10	8	47	29	36	12	9	26	8	1	2	5	1	7	1	2	1	1	19	10	4	10	15	20	44	22	1	11	6	5	1	1	5	7	1	9	1	3	1	3	1	2	2	8	2	3	3	1
ASPDH	9	5	15	17	22	30	10	4	7	1	1	3	13	1	5	1	1	1	1	4	8	15	16	9	11	16	10	2	7	3	2	1	1	3	3	1	2	1	2	1	1	1	1	1	3	2	4	9	3
ASPG	16	18	7	42	45	37	12	16	25	1	2	1	1	1	4	2	1	1	1	10	21	11	16	28	32	24	25	3	2	6	4	3	1	2	4	1	7	1	3	1	1	5	1	4	3	3	1	7	2
ASPH	116	33	133	102	330	458	36	106	82	11	89	116	32	55	14	7	11	63	40	40	273	145	105	99	72	61	162	191	24	364	140	84	1	14	98	1	42	89	20	109	12	48	11	88	15	15	8	26	6
ASPHD1	19	19	26	53	45	69	20	14	31	3	2	2	1	1	8	2	2	1	2	15	30	25	25	26	33	29	44	11	11	19	9	3	1	3	20	2	7	6	3	4	7	2	2	5	1	1	1	9	5
ASPHD2	12	12	17	32	35	38	7	15	14	2	4	3	5	1	1	1	1	2	1	9	25	23	10	15	19	25	31	5	2	11	3	3	1	2	4	1	7	3	5	4	3	1	1	4	1	2	3	5	1
ASPM	17	6	17	43	50	46	8	20	31	2	2	4	4	2	1	2	1	5	2	10	20	13	20	18	20	24	32	5	3	10	5	5	1	4	12	1	3	2	4	7	1	3	1	5	2	3	1	4	2
ASPN	12	12	15	46	35	45	10	5	12	2	1	1	3	1	3	1	1	1	1	8	12	16	11	19	25	19	19	3	4	11	2	6	1	3	6	2	5	1	5	2	4	1	1	2	1	2	4	2	1
ASPRV1	19	8	22	44	56	49	15	13	24	1	1	3	5	1	4	1	3	1	1	5	14	15	19	22	35	18	24	3	2	5	5	6	1	1	10	2	4	1	1	5	1	1	4	5	4	6	3	9	2
ASPSCR1	19	12	22	53	85	67	22	22	42	7	7	5	6	3	6	6	1	9	2	12	33	29	30	24	36	29	54	16	4	18	12	4	1	4	17	3	8	4	10	6	2	6	3	10	6	1	2	3	2
ASRGL1	11	19	18	50	33	40	12	9	15	4	2	4	5	1	3	1	1	1	2	8	21	16	16	17	26	24	30	10	1	19	4	3	1	2	14	2	7	2	3	3	4	3	1	1	5	2	2	3	2
ASS1	19	7	33	23	64	100	5	24	21	4	25	21	2	13	10	1	2	13	15	8	91	43	51	36	29	21	76	35	5	43	17	19	1	4	34	1	10	9	6	17	3	5	2	8	7	3	5	11	4
ASTE1	9	8	17	37	35	48	10	20	30	1	1	1	3	2	1	1	2	2	3	5	15	23	13	16	32	23	36	11	6	15	6	1	1	3	12	2	3	3	5	3	1	3	2	1	1	2	1	9	1
ASTL	16	8	16	32	35	48	8	19	14	2	1	1	3	1	5	1	1	3	2	5	22	19	15	17	34	16	36	3	7	9	7	4	1	3	11	1	8	1	1	3	2	2	8	3	2	6	3	8	1
ASTN1	12	4	12	32	30	30	28	12	14	1	1	1	1	1	1	1	1	2	1	1	6	9	8	14	18	9	11	3	4	1	5	3	1	3	3	1	4	1	2	1	1	1	1	1	1	4	1	5	4
ASTN2	11	17	17	44	41	29	8	11	18	2	1	4	3	2	7	2	3	1	1	10	9	11	18	14	30	21	22	3	4	11	2	4	1	4	14	1	4	1	7	1	4	1	5	4	1	1	1	4	1
ASXL1	12	14	22	46	46	58	18	18	25	3	2	4	8	2	3	3	3	7	1	16	29	22	21	18	39	33	25	26	13	23	8	4	1	4	10	7	7	9	5	4	6	4	3	6	4	1	3	5	2
ASXL2	4	16	18	28	49	41	9	8	17	1	9	17	10	5	9	2	3	13	7	13	18	18	19	27	37	19	36	10	3	18	4	10	1	19	13	3	2	1	4	8	5	3	2	7	9	6	4	3	2
ASXL3	13	7	25	33	40	35	9	10	19	2	3	4	5	1	5	1	1	1	1	7	20	20	15	21	34	28	27	7	10	7	5	3	1	1	5	3	3	3	7	1	3	1	2	2	1	1	1	3	6
ASZ1	14	10	15	41	37	27	14	8	15	1	1	1	1	2	4	1	1	2	1	4	11	14	9	20	22	18	21	12	2	8	7	3	1	3	2	3	2	1	4	3	3	2	1	3	4	1	3	3	1
ATAD1	8	21	10	37	38	36	10	11	29	1	2	6	5	2	5	2	1	4	4	20	35	26	21	35	22	22	45	12	4	11	7	6	1	2	10	3	6	2	3	5	5	2	1	7	1	3	2	6	3
ATAD2	14	8	17	41	64	61	9	15	30	1	12	8	4	9	3	2	1	4	1	15	21	17	22	29	38	32	33	14	10	17	8	12	1	6	10	1	2	7	14	7	7	2	1	8	3	2	6	6	1
ATAD2B	15	8	17	46	28	47	14	10	24	2	1	1	4	1	2	3	1	2	1	7	18	16	17	14	28	24	31	8	3	14	7	3	1	4	7	3	8	4	10	4	2	2	1	3	4	1	2	5	2
ATAD3A	45	28	67	99	132	140	23	50	54	4	4	18	11	5	7	4	7	12	8	19	77	61	58	48	31	30	72	31	12	73	14	13	1	13	21	2	14	24	15	21	6	7	4	6	6	5	11	22	1
ATAD3C	12	13	9	33	26	36	14	6	16	1	2	4	1	1	3	1	1	1	2	10	14	13	17	16	27	20	24	7	4	9	3	1	1	1	12	4	7	2	1	4	3	2	1	2	2	3	3	5	1
ATAD5	18	7	10	32	26	31	4	5	20	3	1	2	4	1	2	1	1	1	1	7	21	16	23	21	40	20	21	6	1	4	8	5	1	3	6	3	3	1	6	2	2	2	4	4	1	1	1	9	1
ATAT1	10	2	11	40	32	37	8	12	17	4	6	8	2	1	2	1	1	7	3	7	23	10	12	13	20	11	20	11	4	18	4	1	1	3	9	1	4	4	7	14	4	4	2	5	1	1	1	2	7
ATCAY	14	5	16	44	38	40	5	11	20	1	1	2	2	1	1	1	1	1	1	10	30	22	22	22	34	23	28	2	5	7	8	4	1	1	4	1	11	2	2	4	1	2	3	4	4	4	5	8	4
ATE1	12	7	13	39	42	55	10	8	18	2	5	5	3	1	4	1	1	8	2	8	18	19	21	22	23	20	32	13	4	22	5	9	1	4	13	1	9	6	8	5	1	4	2	2	3	3	1	5	2
ATF1	7	10	16	34	25	36	9	10	14	2	6	4	5	3	3	3	6	9	5	11	30	18	19	19	29	21	31	7	10	22	4	4	1	4	13	3	7	8	10	4	3	3	2	8	3	5	3	8	3
ATF2	29	12	37	51	92	120	16	31	32	4	6	9	7	5	8	4	4	9	8	14	52	30	34	36	24	29	46	13	9	35	8	8	1	12	12	4	8	5	10	6	5	9	3	9	3	6	3	6	1
ATF3	21	16	29	82	121	153	11	15	49	4	29	119	27	18	24	32	6	58	24	92	22	16	20	17	30	24	40	69	30	151	81	8	1	22	21	2	31	7	9	38	8	21	7	44	1	4	4	9	6
ATF4	54	34	50	108	109	176	30	53	60	21	64	77	48	33	28	34	20	71	39	45	158	100	102	70	54	31	110	84	26	124	54	42	1	20	57	2	49	42	56	58	32	31	10	24	15	3	7	19	6
ATF5	17	13	14	29	43	28	10	8	16	1	5	6	3	2	7	5	4	9	2	7	21	11	15	25	15	16	20	13	2	21	9	3	1	5	13	3	5	2	8	7	7	1	1	4	5	1	2	7	1
ATF6	11	7	21	27	32	41	9	13	18	4	4	8	3	1	7	2	1	2	1	5	25	14	17	13	30	19	21	10	9	18	18	5	1	4	6	1	7	6	6	7	4	4	2	9	5	3	2	7	1
ATF6B	25	7	29	59	72	64	8	24	27	6	10	16	7	6	8	2	4	21	8	14	38	29	22	29	40	25	43	32	2	47	11	12	1	8	12	1	6	9	11	16	5	4	1	12	4	3	8	8	4
ATF7	22	15	31	52	46	57	11	14	35	3	9	18	3	4	7	2	2	23	9	15	35	35	34	32	24	14	51	13	11	36	11	5	1	7	15	1	22	7	10	9	5	8	2	17	6	1	2	8	1
ATF7IP	5	14	21	48	79	72	8	19	36	5	6	11	12	2	13	4	2	9	6	25	39	35	32	23	29	29	36	21	4	56	6	14	1	5	19	2	16	19	6	5	2	3	9	13	7	3	4	4	2
ATF7IP2	19	11	16	34	39	48	7	14	11	1	3	4	2	3	1	1	3	3	2	9	18	10	9	19	14	17	25	3	4	12	9	4	1	3	10	1	2	2	2	2	1	3	2	9	1	2	1	2	1
ATG10	8	10	17	33	29	29	10	10	25	1	1	1	1	1	3	2	1	1	1	7	12	17	14	11	30	16	28	7	3	11	3	1	1	4	8	1	4	4	5	2	3	1	2	2	1	2	2	2	1
ATG101	19	14	17	49	48	80	12	11	20	6	9	21	12	5	7	3	5	13	12	15	48	31	24	24	26	24	40	12	4	25	14	7	1	7	15	2	9	6	15	8	5	5	3	5	2	3	1	8	1
ATG12	24	15	30	64	66	78	19	30	24	1	5	9	6	2	8	1	1	10	1	19	29	31	26	28	23	25	43	16	14	40	13	10	1	6	11	1	12	10	8	11	6	4	2	5	2	6	3	8	2
ATG13	9	11	11	31	26	33	8	12	20	2	3	4	2	1	2	1	1	6	1	16	17	18	18	21	23	17	40	9	9	8	9	6	1	7	30	1	9	3	5	3	1	1	2	5	3	2	7	14	3
ATG14	121	71	178	240	288	348	55	159	153	9	10	14	7	5	8	2	6	18	7	60	121	134	118	126	61	58	184	37	14	40	16	14	1	9	18	1	12	16	10	12	6	12	4	23	9	3	3	9	3
ATG16L1	14	13	11	28	28	58	11	21	18	1	9	15	5	7	1	1	1	4	2	11	13	17	17	19	24	18	21	11	3	18	6	6	1	2	12	1	6	2	10	6	4	6	5	7	3	2	4	5	1
ATG16L2	18	12	22	33	52	78	65	18	20	2	6	3	3	3	6	1	1	10	2	7	19	18	23	14	22	17	31	14	6	12	12	6	1	4	12	1	4	3	1	6	2	1	3	1	3	1	1	8	2
ATG2A	17	16	24	56	72	107	11	26	27	2	1	14	6	3	1	3	1	7	1	15	30	33	18	30	36	18	39	4	7	30	5	6	1	5	12	1	7	7	4	8	1	3	1	6	3	3	3	5	2
ATG2B	13	18	17	47	40	44	18	16	30	6	2	6	5	2	6	4	2	10	4	20	27	23	29	25	27	22	34	19	10	44	9	5	1	4	16	2	15	6	11	11	4	1	3	6	2	3	2	10	4
ATG3	26	19	26	68	70	78	17	17	21	10	9	6	13	6	9	3	3	10	3	13	39	28	30	27	32	26	54	25	9	57	12	8	1	5	19	4	15	13	14	11	6	4	3	6	6	6	7	11	3
ATG4A	28	15	23	63	66	85	10	28	24	2	3	4	6	1	4	1	1	3	1	9	25	15	22	23	26	20	31	7	8	17	11	11	1	4	9	2	4	3	4	4	4	2	2	2	1	1	2	11	1
ATG4B	34	14	35	40	84	91	13	24	23	5	7	13	7	6	10	2	1	14	4	14	33	38	38	34	30	21	56	18	6	50	14	10	1	4	11	1	13	13	4	12	6	17	2	16	7	4	3	7	1
ATG4C	17	16	22	55	51	65	9	13	37	5	1	4	7	1	6	3	1	2	4	13	16	21	19	21	25	21	24	10	6	19	5	3	1	1	7	1	4	4	4	3	6	1	2	3	3	3	3	5	5
ATG4D	35	24	29	57	79	85	23	27	39	1	6	14	5	2	6	1	2	12	1	12	55	28	27	41	38	29	55	22	5	53	14	11	1	11	19	1	15	13	7	11	8	5	4	5	2	1	3	4	1
ATG5	21	16	15	51	43	48	13	8	24	6	9	8	8	4	11	3	1	13	4	14	37	35	26	26	32	22	38	18	5	35	9	7	1	3	21	1	13	7	9	6	3	10	3	8	3	4	4	11	1
ATG7	11	10	16	42	37	42	7	15	19	2	1	4	7	2	2	4	3	4	2	11	26	24	20	16	46	30	30	11	5	17	10	3	1	4	11	1	8	8	5	4	2	6	3	6	1	3	3	6	1
ATG9A	19	15	22	52	50	98	14	17	21	2	9	5	3	2	8	2	1	10	2	12	40	32	24	31	24	18	35	13	4	30	11	9	1	3	12	3	8	8	6	6	5	5	2	7	5	5	3	6	3
ATG9B	26	10	24	44	48	85	12	18	25	4	7	12	3	1	5	2	1	6	1	8	24	14	18	30	34	26	40	12	7	15	4	3	1	5	11	1	5	5	6	9	3	5	1	6	2	2	3	8	3
ATIC	14	12	27	62	68	73	4	18	29	5	1	8	3	5	7	2	1	9	8	11	26	27	19	26	32	27	41	13	2	18	7	7	1	3	11	2	6	9	8	5	2	4	1	7	4	4	4	5	1
ATL1	78	38	64	99	169	215	26	81	57	2	1	6	3	6	3	4	1	6	6	15	30	38	38	31	35	27	54	15	7	16	6	8	1	6	9	2	14	5	6	6	2	4	3	3	1	1	4	6	4
ATL2	12	14	16	42	52	52	9	24	14	5	14	21	8	8	7	2	3	24	14	14	37	25	28	33	30	18	36	16	7	31	3	12	1	6	15	1	13	11	5	5	6	8	2	19	7	5	5	8	2
ATL3	17	12	36	53	102	89	10	21	27	9	5	10	5	3	3	4	1	7	7	18	72	39	40	28	33	33	47	15	4	33	11	9	1	3	9	2	14	2	9	11	5	3	1	11	11	1	3	5	3
ATM	11	9	19	42	41	36	11	11	12	1	1	1	3	1	6	1	1	3	4	11	10	17	12	22	28	18	28	3	3	9	5	4	1	1	7	1	5	1	2	3	2	1	1	3	5	1	1	5	1
ATMIN	35	17	39	58	69	84	11	24	37	6	2	4	1	3	3	1	1	7	4	9	41	30	33	26	31	30	48	11	5	25	2	8	1	5	11	2	12	6	7	4	7	4	2	6	3	2	1	5	4
ATN1	30	16	23	53	98	86	14	26	34	5	3	3	11	3	12	4	7	7	3	18	37	42	42	44	56	25	51	40	16	72	19	18	1	9	27	2	10	14	13	26	4	15	4	20	7	3	3	6	2
ATOH1	5	8	13	32	19	27	9	10	26	1	3	1	2	1	5	1	1	1	1	10	11	10	18	18	37	21	28	8	5	7	6	5	1	7	9	2	5	1	2	1	3	1	2	3	3	5	3	4	3
ATOH7	16	12	18	28	36	41	9	8	21	1	1	1	1	1	5	1	1	1	1	7	12	13	16	18	30	17	25	6	3	9	2	2	1	2	8	2	3	1	7	2	4	2	1	3	4	1	1	3	1
ATOH8	12	16	17	47	34	51	12	11	23	2	2	1	9	1	5	4	2	5	1	16	16	9	13	15	25	23	21	5	8	5	5	3	1	2	5	1	7	3	1	1	2	1	2	1	6	2	1	8	5
ATOX1	28	20	30	71	59	72	12	24	32	6	8	8	4	1	8	1	1	8	5	10	17	14	21	19	19	19	20	15	10	34	21	13	1	6	14	1	10	5	6	9	8	3	2	4	5	3	7	8	1
ATP10A	4	7	9	32	14	28	10	6	18	3	1	1	1	1	2	1	1	1	1	7	16	13	14	8	40	17	19	5	3	7	4	5	1	7	8	1	3	2	12	3	3	2	2	3	2	2	2	3	1
ATP10B	36	17	25	31	71	67	5	22	24	3	16	17	2	3	5	1	2	7	3	9	29	23	24	23	13	21	34	67	7	103	21	16	1	2	6	1	9	19	4	17	2	7	1	13	1	1	2	5	1
ATP10D	8	10	15	50	31	56	9	9	20	3	4	4	7	1	3	1	2	4	1	9	16	24	17	23	31	25	19	6	3	11	7	9	1	13	5	1	9	4	8	5	2	3	1	5	5	1	1	3	3
ATP11A	24	12	30	20	51	50	6	31	15	4	20	25	7	12	5	1	1	16	7	4	33	33	24	22	20	15	40	15	7	57	12	11	1	7	14	1	9	11	5	16	4	2	4	12	1	3	3	6	2
ATP11B	10	5	14	29	48	79	14	17	12	2	14	11	8	3	3	1	4	12	4	16	35	9	16	27	28	22	37	14	6	39	13	9	1	4	11	2	14	7	8	10	6	9	5	10	4	6	7	8	1
ATP11C	21	17	19	40	44	49	9	20	16	3	5	6	5	1	9	1	2	4	3	12	14	14	18	24	33	27	31	12	7	18	10	6	1	4	12	1	7	5	8	7	2	6	4	8	2	1	3	6	1
ATP12A	5	9	8	31	20	27	3	10	10	1	1	1	2	1	5	3	1	1	2	9	16	11	12	12	22	10	10	5	4	6	5	1	1	1	27	1	2	1	5	1	1	1	2	2	2	1	3	2	4
ATP13A1	27	11	31	55	56	60	15	35	25	4	2	4	6	1	8	1	1	8	1	11	30	16	28	24	29	16	26	21	6	29	13	10	1	1	9	2	8	11	8	8	5	5	6	7	1	2	4	10	2
ATP13A2	14	8	18	42	38	44	9	17	18	6	4	6	3	3	1	1	1	8	3	15	28	27	15	18	26	21	20	6	5	24	10	2	1	4	23	4	13	7	5	5	1	11	1	3	2	1	4	11	2
ATP13A3	21	12	38	62	88	128	21	31	33	1	6	23	9	4	11	7	3	16	8	14	43	34	33	34	33	30	39	18	5	45	8	16	1	3	6	1	10	9	18	10	3	7	5	12	1	3	5	2	2
ATP13A4	9	13	13	40	24	39	11	11	20	1	1	1	3	1	4	1	1	1	1	7	20	18	26	19	42	17	28	10	8	14	4	5	1	1	10	1	4	1	5	1	2	3	6	3	3	3	1	7	1
ATP13A5	18	10	23	47	58	42	10	11	18	1	2	2	1	1	3	1	1	1	1	11	13	18	17	15	28	19	22	10	5	40	5	1	1	2	9	2	5	3	4	2	2	1	2	2	1	1	1	3	3
ATP1A1	37	22	56	97	81	92	17	32	26	8	10	21	9	9	8	2	3	20	13	16	87	46	61	44	31	25	86	33	10	98	22	14	1	3	19	1	19	18	8	16	10	17	2	19	3	5	10	15	9
ATP1A2	8	7	15	33	27	48	8	8	13	5	1	1	13	1	13	6	5	1	1	10	12	14	21	17	49	49	20	10	4	4	1	2	1	1	10	1	3	1	5	4	1	1	3	4	7	1	2	4	1
ATP1A3	42	35	60	137	134	133	26	47	38	3	4	2	5	1	9	1	1	2	2	12	35	39	27	37	32	29	50	12	5	15	15	6	1	8	9	4	7	2	7	4	3	6	8	9	3	1	1	8	1
ATP1A4	10	6	15	26	33	28	12	11	16	2	2	1	2	1	1	1	1	1	2	5	11	9	17	15	19	9	24	8	3	7	1	5	1	4	23	1	3	3	1	3	1	2	3	3	3	1	1	5	1
ATP1B1	1316	592	1378	1897	2876	3401	354	1341	955	20	187	294	10	72	11	6	6	220	130	111	528	316	349	274	84	70	567	326	39	677	335	167	1	35	222	2	74	200	43	305	28	146	17	97	31	18	23	56	29
ATP1B2	14	10	13	34	30	29	10	17	21	1	1	2	2	1	4	2	2	1	3	9	14	13	7	21	24	27	22	10	1	7	4	1	1	1	10	2	6	1	1	1	2	1	1	8	4	1	3	7	1
ATP1B3	53	23	72	68	150	140	26	31	34	13	20	23	34	17	15	30	7	26	17	29	92	57	34	37	36	28	82	45	20	92	20	23	1	14	28	1	32	43	48	33	24	21	12	7	7	1	7	13	1
ATP1B4	14	9	19	34	38	31	12	14	14	1	1	2	4	1	5	1	1	1	1	9	9	9	13	12	30	19	24	3	7	5	4	1	1	1	7	1	2	1	6	2	1	3	1	4	1	4	1	2	3
ATP23	16	10	13	23	28	30	8	5	21	3	3	5	1	2	3	1	1	1	1	10	19	16	21	15	23	25	28	7	10	14	4	3	1	1	5	1	4	4	3	5	1	1	2	8	3	4	1	4	1
ATP2A1	40	42	59	348	123	149	25	35	96	9	9	17	21	2	18	7	9	18	7	15	29	26	22	21	42	40	34	27	12	54	44	11	1	13	21	3	32	17	25	9	16	5	8	6	6	2	1	5	2
ATP2A2	35	14	55	69	135	122	14	46	26	9	16	27	8	11	9	6	5	19	16	22	70	53	49	55	31	34	77	40	10	82	17	23	1	7	56	1	16	12	20	23	6	20	7	13	7	2	5	7	4
ATP2A3	24	14	19	47	46	60	6	14	23	2	9	11	4	2	5	1	4	8	1	9	45	30	24	26	30	19	42	19	9	45	14	8	1	6	22	2	6	9	4	9	6	1	4	2	5	5	6	2	4
ATP2B1	13	15	17	55	45	63	10	17	29	4	8	10	10	5	14	8	5	16	3	18	41	38	33	32	30	26	44	18	20	45	14	10	1	8	21	1	19	6	11	20	11	11	3	12	10	1	4	5	2
ATP2B2	12	5	19	36	32	46	9	15	17	3	4	1	1	1	4	1	2	3	1	6	10	11	11	15	17	13	22	7	7	5	1	6	1	1	8	3	3	2	5	6	1	1	1	1	1	4	1	6	1
ATP2B3	5	8	12	27	31	31	17	11	31	1	1	1	3	1	3	1	1	1	1	7	15	14	15	20	21	17	17	9	3	6	2	2	1	5	8	5	4	3	3	2	4	1	3	3	1	3	3	9	1
ATP2B4	73	40	59	127	153	287	33	107	77	14	20	48	13	14	9	7	3	36	35	39	87	69	88	94	45	46	124	43	28	124	32	55	1	10	28	4	36	34	33	108	26	56	5	37	5	6	1	11	1
ATP2C1	39	15	34	73	151	157	25	30	33	4	11	20	16	7	9	8	6	25	10	32	136	52	64	50	36	20	115	44	14	65	22	18	1	8	16	1	19	13	21	14	8	7	7	17	3	4	9	7	2
ATP2C2	22	10	28	35	42	64	8	12	16	1	7	6	6	3	3	1	1	6	2	12	27	25	33	28	32	18	34	18	2	53	8	12	1	2	21	3	6	4	1	5	2	4	3	5	3	1	6	10	1
ATP4A	12	7	15	50	37	43	13	10	18	1	1	1	3	1	7	1	1	1	1	5	19	11	21	18	27	27	21	6	6	3	10	5	1	2	16	1	4	1	1	2	2	2	1	7	2	4	2	4	1
ATP4B	12	12	14	26	24	33	9	16	18	2	1	1	3	1	4	1	1	1	1	7	10	16	11	18	23	20	15	8	5	4	4	1	1	4	8	1	1	3	3	2	1	1	2	6	3	2	1	7	1
ATP5F1A	25	20	26	75	72	87	17	22	33	8	11	14	7	5	5	2	8	13	8	25	30	20	36	26	46	26	31	13	11	31	15	17	1	9	14	1	16	9	15	11	13	5	4	5	7	7	8	12	7
ATP5F1B	44	24	69	108	149	150	14	44	33	15	54	57	15	25	5	6	8	47	29	26	93	71	55	35	28	25	99	50	12	137	36	35	1	9	30	3	27	34	17	37	15	15	6	24	11	4	3	11	2
ATP5F1C	33	24	28	125	93	86	17	38	23	6	19	25	12	8	9	5	2	30	14	31	69	49	50	35	44	27	60	33	18	121	35	37	1	5	36	3	18	21	15	37	10	13	8	27	10	3	4	10	4
ATP5F1D	37	25	56	70	103	106	8	40	28	5	6	4	2	3	5	4	1	7	3	16	70	58	40	31	35	21	73	29	9	67	24	17	1	3	16	2	21	10	20	19	6	1	4	16	4	3	6	7	2
ATP5F1E	14	15	18	39	59	65	10	26	7	2	1	2	5	2	4	1	1	4	1	9	36	24	19	17	22	9	28	16	1	21	10	6	1	2	8	1	6	4	5	6	1	3	1	9	2	2	7	9	4
ATP5IF1	63	31	60	78	97	119	16	48	43	16	36	38	10	11	13	8	3	29	13	23	134	78	66	56	38	31	124	85	10	174	57	42	1	4	53	2	23	40	17	53	8	27	6	30	12	1	13	10	6
ATP5MC1	61	38	50	112	145	158	41	59	73	9	11	10	12	8	9	4	3	8	11	24	67	52	53	55	52	46	78	24	11	34	15	13	1	8	24	2	13	16	18	11	7	3	5	23	8	2	6	10	3
ATP5MC2	2998	1228	2881	1290	10323	9544	619	2798	1997	181	329	365	178	124	110	66	51	699	291	763	4716	3061	3724	3810	798	659	7068	1127	149	1910	808	1056	1	162	318	93	334	316	274	666	198	218	53	1517	118	13	14	18	8
ATP5MC3	65	30	76	82	143	165	13	50	43	12	16	27	14	7	10	5	4	21	15	31	108	68	53	52	32	23	86	39	8	91	24	30	1	9	32	2	15	11	11	30	11	12	2	18	6	8	10	19	4
ATP5ME	68	24	91	137	157	134	17	61	47	16	13	23	22	6	19	5	7	28	9	32	90	74	69	54	40	32	86	67	17	108	33	28	1	19	36	5	42	21	17	34	16	17	7	17	10	2	3	13	3
ATP5MF	68	22	66	109	197	225	11	59	53	15	39	31	6	17	6	13	7	51	16	30	116	88	85	66	35	40	111	100	14	195	52	80	1	15	84	3	33	51	25	53	10	26	7	59	10	5	19	29	6
ATP5MG	2147	1318	2865	5085	7130	7275	875	2433	2482	97	204	271	148	87	86	68	64	386	194	610	2187	2225	2037	2235	756	586	3193	1187	329	1067	879	558	1	229	397	224	487	333	179	279	124	124	159	628	269	16	20	33	13
ATP5MGL	27	15	27	45	61	104	15	25	33	4	3	5	8	4	3	2	1	3	1	10	30	23	27	26	23	29	35	20	7	16	4	4	1	1	23	1	7	6	7	3	3	1	3	6	3	1	1	5	1
ATP5MJ	73	28	76	88	190	206	19	73	49	10	15	26	15	8	10	7	3	23	9	30	69	51	40	39	39	35	69	47	14	113	29	29	1	9	21	3	22	25	24	31	11	11	4	20	6	6	10	12	1
ATP5MK	86	20	78	157	216	227	12	64	61	11	37	50	15	12	10	11	9	38	16	33	162	90	70	62	35	23	112	88	17	167	64	79	1	11	30	1	17	30	23	76	11	23	8	34	13	6	5	10	2
ATP5PB	12	7	8	25	24	38	6	9	10	3	1	4	2	1	5	1	1	3	2	7	7	13	12	15	15	20	19	13	6	16	7	2	1	5	8	1	1	5	2	3	2	1	1	3	1	3	3	5	4
ATP5PD	44	21	75	133	128	148	17	43	49	17	32	25	11	21	11	4	5	47	19	31	37	34	44	35	44	37	51	25	8	69	21	11	1	10	10	3	16	12	9	13	11	5	4	16	4	6	3	9	1
ATP5PF	42	16	59	61	118	100	13	42	33	4	7	8	11	3	6	2	1	11	7	17	19	25	25	19	28	27	29	22	11	52	33	13	1	12	12	2	10	8	12	9	5	5	5	12	16	3	3	4	1
ATP5PO	78	25	116	124	219	211	10	69	41	13	9	12	15	7	14	5	5	14	7	25	48	19	26	25	41	25	47	56	13	111	28	37	1	8	17	3	19	19	12	27	11	6	4	25	13	2	4	14	3
ATP6AP1	34	18	33	77	76	91	20	27	32	11	15	14	10	1	10	5	5	23	11	35	62	41	45	45	42	24	72	47	13	86	22	35	1	12	28	2	17	27	11	14	6	14	4	24	8	10	5	11	10
ATP6AP1L	51	23	42	82	101	121	31	42	58	3	1	1	1	1	8	1	1	6	1	19	18	30	20	25	33	14	39	11	6	12	3	4	1	6	10	1	4	5	5	1	3	2	3	4	1	2	1	4	5
ATP6AP2	39	19	43	100	104	143	20	25	54	8	6	6	13	1	16	9	4	15	3	38	58	64	44	47	47	37	69	17	14	29	21	15	1	9	15	2	21	8	18	14	9	4	4	10	9	4	9	10	2
ATP6V0A1	40	25	43	65	94	131	10	33	41	10	8	8	16	6	9	3	6	7	1	21	74	52	50	60	41	25	76	27	7	27	17	13	1	9	13	3	12	5	10	10	5	5	4	11	6	1	3	8	1
ATP6V0A2	10	17	12	31	30	30	9	16	21	3	2	2	5	1	1	1	1	2	3	12	23	20	19	17	40	23	31	7	4	13	6	3	1	1	9	1	5	2	2	5	1	4	3	3	5	1	4	4	1
ATP6V0A4	7	11	14	32	25	26	8	11	16	1	1	1	1	1	3	1	1	1	1	11	12	14	10	23	25	25	34	6	2	6	2	4	1	1	10	1	11	2	1	1	5	2	2	1	1	1	4	14	2
ATP6V0B	254	125	290	487	664	871	81	322	260	13	21	29	18	9	10	10	9	23	7	87	226	173	175	166	66	70	271	130	29	158	74	63	1	18	44	36	49	53	29	58	18	29	14	45	17	8	12	24	8
ATP6V0C	29	18	40	105	103	143	22	34	43	5	11	14	12	6	6	3	2	9	7	34	102	75	70	49	34	24	92	25	16	43	45	35	1	7	17	1	15	4	14	14	10	7	2	20	8	8	10	26	5
ATP6V0D1	17	10	23	43	53	55	12	17	22	2	2	4	8	2	5	2	2	1	1	16	46	39	20	25	29	10	28	17	8	41	5	14	1	8	12	2	8	11	10	11	8	8	3	9	1	2	1	6	5
ATP6V0D2	12	9	11	34	28	36	3	7	14	1	1	3	2	1	4	1	1	1	1	7	9	10	10	16	26	15	20	7	2	5	9	3	1	3	8	1	3	1	2	6	1	1	1	5	1	4	1	8	1
ATP6V0E1	17	14	32	55	48	53	7	18	28	4	10	19	10	5	6	4	6	24	4	14	23	14	20	16	22	20	20	23	7	47	17	19	1	3	11	1	12	15	10	12	7	9	2	13	6	4	4	14	3
ATP6V0E2	18	16	29	47	44	73	10	17	32	4	1	2	6	1	2	4	2	4	1	12	23	11	16	21	30	26	29	9	12	19	8	5	1	9	12	1	16	7	7	6	5	3	2	9	3	5	1	10	3
ATP6V1A	12	13	25	37	50	51	7	12	18	3	3	7	3	1	3	1	2	2	1	14	31	16	11	19	31	17	18	14	6	28	6	8	1	4	8	2	7	6	6	8	5	3	2	5	1	3	4	9	1
ATP6V1B1	2	8	11	24	32	36	7	8	12	2	1	1	3	1	3	1	1	3	1	7	9	8	6	21	35	19	25	9	3	8	1	3	1	1	6	3	1	1	5	2	1	2	3	3	24	2	1	8	5
ATP6V1B2	22	33	33	116	63	50	16	23	45	18	5	9	11	6	9	10	4	5	2	54	45	29	23	34	33	24	46	21	17	37	17	19	1	15	11	2	33	11	38	11	22	9	13	9	12	6	5	5	2
ATP6V1C1	14	7	10	38	38	39	11	10	18	1	5	4	5	1	4	1	1	3	1	12	17	8	26	17	32	23	24	18	4	24	4	8	1	1	12	1	10	7	5	5	2	4	2	6	2	1	6	10	2
ATP6V1C2	13	11	21	42	53	64	9	19	31	2	2	1	1	1	12	1	2	4	1	9	16	12	23	24	31	23	31	5	2	8	9	1	1	7	6	1	4	1	2	3	3	1	1	7	3	2	1	6	1
ATP6V1D	14	18	26	61	70	82	11	20	30	2	1	5	5	3	6	1	1	7	6	11	14	21	36	19	31	20	30	17	3	30	6	14	1	3	15	1	6	6	14	14	8	7	1	9	4	1	5	2	1
ATP6V1E1	21	13	21	61	44	53	10	14	29	10	11	11	6	4	12	5	5	14	4	11	18	25	31	32	38	32	35	11	7	32	6	8	1	4	14	2	14	6	6	10	6	1	6	6	6	3	6	7	1
ATP6V1E2	5	5	4	17	16	18	4	4	9	1	1	3	1	1	4	2	1	1	3	5	18	12	6	8	24	18	21	3	3	6	6	2	1	3	5	1	2	1	3	2	1	1	1	4	2	1	2	5	1
ATP6V1F	14	27	25	96	49	54	9	18	37	8	12	15	6	3	7	4	1	21	8	24	60	41	42	31	27	25	55	17	9	46	16	21	1	7	15	1	6	14	18	17	10	11	5	14	2	7	6	12	6
ATP6V1FNB	11	15	12	36	25	29	8	15	15	1	1	2	1	2	2	1	1	2	1	8	21	15	12	17	17	20	30	3	4	6	3	2	1	2	13	1	3	7	3	2	2	1	3	1	1	2	3	6	1
ATP6V1G1	40	25	40	118	124	174	14	39	58	17	20	21	12	14	7	6	10	33	18	33	98	82	70	60	58	50	84	43	9	103	50	45	1	18	37	7	20	18	25	33	24	25	5	27	14	1	6	19	9
ATP6V1G2	9	9	11	36	23	24	6	12	14	2	1	1	1	1	3	1	1	1	3	9	12	11	16	19	22	26	16	4	3	6	5	3	1	1	8	1	8	1	3	1	3	2	1	5	1	3	6	7	1
ATP6V1G3	9	9	11	26	40	46	12	11	19	1	2	2	3	2	1	1	2	5	1	11	15	22	11	18	23	22	21	10	4	7	8	2	1	1	10	4	3	2	4	1	1	4	1	3	4	4	2	7	2
ATP6V1H	12	14	20	48	54	71	10	16	21	3	5	9	4	2	5	1	3	4	2	9	30	12	18	23	30	25	31	14	5	29	14	11	1	2	7	1	8	1	7	8	7	5	3	10	2	3	1	3	2
ATP7A	7	8	17	46	43	43	8	8	17	1	4	3	4	1	2	2	2	4	1	7	12	10	21	11	25	18	27	5	3	16	6	5	1	2	11	2	8	1	3	3	1	1	3	3	3	1	3	7	2
ATP7B	27	11	21	28	30	47	7	16	23	1	10	10	2	1	2	1	1	5	1	11	25	17	11	20	19	20	40	11	2	69	4	3	1	2	2	1	7	5	3	10	3	1	1	3	4	2	3	5	2
ATP8A1	13	6	27	22	36	37	3	13	11	4	5	7	8	3	4	4	2	5	2	20	70	36	18	29	38	25	71	21	7	33	6	7	1	1	12	1	14	5	4	1	2	1	3	7	2	6	5	6	2
ATP8A2	15	11	15	37	42	40	8	11	16	3	1	2	1	1	5	1	2	2	1	12	15	11	17	24	40	21	23	4	3	8	2	6	1	4	21	2	3	2	4	4	2	1	4	3	3	2	1	7	3
ATP8B1	41	16	57	44	80	129	12	37	30	3	16	15	1	6	7	2	1	15	4	16	27	30	32	28	28	36	39	22	6	31	13	5	1	7	13	2	7	7	8	5	3	1	4	6	4	2	4	11	2
ATP8B2	10	15	10	34	43	36	10	13	25	3	2	7	2	1	8	2	1	3	2	8	17	12	16	19	26	18	24	7	11	10	4	1	1	9	12	4	11	2	6	3	2	4	1	7	2	2	1	7	5
ATP8B3	17	13	19	39	38	33	15	10	28	1	2	1	1	1	4	2	2	1	1	9	16	18	8	19	23	18	22	4	3	5	2	3	1	1	13	3	5	2	5	4	1	1	1	3	3	1	2	4	1
ATP8B4	11	15	17	39	33	37	15	9	19	1	1	1	3	1	2	2	1	1	2	15	7	15	16	14	34	23	19	5	4	9	4	7	1	2	1	2	10	4	4	2	1	2	8	3	3	2	1	4	1
ATP9A	19	15	21	48	50	46	7	28	17	3	11	22	4	5	2	1	1	23	12	10	31	25	32	18	19	20	36	33	3	57	14	10	1	2	18	2	7	24	3	14	5	21	2	18	3	2	2	6	1
ATP9B	8	9	18	28	26	43	10	14	18	1	3	4	3	1	2	3	1	1	1	8	19	17	12	10	27	17	21	3	10	9	7	3	1	4	28	1	6	1	1	4	1	1	3	8	1	1	1	9	1
ATPAF1	19	16	32	63	65	69	11	12	38	4	7	7	12	2	7	2	4	7	4	12	16	19	23	20	39	24	30	12	8	28	12	3	1	5	13	2	9	10	10	5	5	5	3	5	7	2	3	7	1
ATPAF2	9	7	12	33	41	51	11	17	28	5	3	3	3	1	5	2	1	1	5	11	20	24	17	15	30	20	24	4	3	6	4	2	1	4	13	1	7	4	4	6	1	5	1	3	2	3	1	5	2
ATPSCKMT	15	7	13	40	62	49	11	23	25	2	1	2	6	1	3	1	1	3	4	16	25	26	18	23	26	30	34	17	5	19	6	6	1	2	7	2	4	2	1	2	4	3	3	6	1	3	6	8	1
ATR	15	10	27	53	72	57	8	16	21	4	4	8	3	5	3	6	3	5	2	14	33	26	30	25	33	23	35	11	5	27	12	14	1	5	11	2	3	8	11	7	2	6	1	10	6	1	2	6	1
ATRAID	16	10	29	60	58	73	12	38	32	4	9	7	6	3	4	3	2	6	4	19	34	25	22	30	33	23	39	21	10	30	23	41	1	5	14	3	19	15	8	6	5	4	1	19	2	4	5	12	4
ATRN	14	7	16	46	31	43	6	15	13	2	1	3	4	1	3	1	4	4	3	13	17	16	11	13	30	29	21	12	5	10	2	5	1	2	8	1	2	1	7	1	1	2	2	3	2	1	1	6	3
ATRNL1	7	12	12	26	27	39	9	13	11	2	1	1	2	1	5	3	1	1	2	5	13	8	20	18	21	22	24	4	4	6	7	4	1	4	6	2	3	1	3	1	1	1	2	6	1	3	3	3	1
ATRX	1432	596	1864	2869	4100	4595	481	1450	1148	49	59	105	59	48	33	33	30	92	63	194	744	1107	777	816	417	322	1166	423	102	476	436	184	1	82	167	93	176	158	118	148	60	79	109	172	94	12	25	29	19
ATXN1	16	13	26	48	65	62	33	18	31	6	9	15	7	2	4	4	2	21	9	22	45	23	39	36	39	28	49	50	12	75	24	8	1	7	17	4	16	23	19	29	14	12	5	8	6	2	6	7	1
ATXN10	14	17	17	47	66	70	4	14	20	1	6	6	4	1	6	5	1	6	2	12	28	23	23	8	20	14	24	5	7	16	6	7	1	3	5	1	11	5	10	5	1	3	2	9	2	4	7	3	3
ATXN1L	18	20	14	53	52	64	14	18	42	5	7	9	6	3	11	5	5	19	6	17	20	24	23	19	27	18	35	8	8	39	7	6	1	5	12	1	11	11	12	6	2	6	3	3	9	1	3	10	5
ATXN2	34	19	43	54	95	95	19	29	25	8	8	13	6	3	7	3	1	12	5	24	65	46	38	63	41	29	62	24	17	53	15	16	1	7	18	1	18	7	15	20	13	15	5	17	11	5	4	10	5
ATXN2L	24	19	35	60	100	124	10	45	30	10	20	32	11	9	10	4	6	30	8	20	62	40	42	43	40	27	55	32	7	57	21	25	1	8	18	1	23	29	17	26	9	18	3	13	5	2	5	12	4
ATXN3	16	18	20	45	51	61	9	24	22	3	4	3	7	1	5	2	2	4	5	17	23	22	20	21	49	30	36	14	6	22	6	12	1	3	13	3	10	5	8	6	4	4	2	14	2	3	3	8	1
ATXN3L	13	12	15	25	30	39	10	14	17	1	1	1	2	1	6	1	1	1	1	10	13	15	19	18	40	20	25	5	11	6	1	6	1	3	4	1	6	3	2	1	1	2	4	6	2	4	1	10	6
ATXN7	17	11	28	59	45	46	14	21	27	10	17	24	15	10	10	6	8	22	15	12	33	21	22	14	29	32	34	33	11	52	14	12	1	7	15	1	15	15	8	15	7	9	2	9	5	1	4	7	2
ATXN7L1	18	13	15	53	46	37	6	27	18	2	2	11	3	2	7	2	1	4	1	11	28	18	21	23	32	41	43	14	12	15	10	5	1	3	8	3	5	5	7	6	4	2	1	9	1	1	3	3	3
ATXN7L2	6	6	18	40	35	40	18	12	20	4	1	1	3	1	2	3	1	2	1	8	10	10	8	14	24	14	21	3	1	11	1	2	1	1	9	1	6	7	4	4	3	2	1	3	1	3	2	7	2
ATXN7L3	23	16	27	52	58	66	22	11	31	4	4	14	5	6	5	3	4	19	7	15	31	20	21	20	35	36	26	11	9	30	7	4	1	7	11	1	10	5	9	10	2	9	5	10	9	1	5	8	2
ATXN7L3B	28	22	39	49	112	107	21	34	30	4	6	6	7	1	8	4	6	8	5	15	51	42	47	29	32	19	67	18	4	36	7	11	1	3	14	3	12	13	9	11	7	6	3	11	1	2	2	5	1
AUH	25	14	20	47	54	54	12	17	29	5	11	12	10	2	12	1	1	5	7	31	41	21	25	34	20	25	34	25	6	46	13	5	1	5	18	1	14	19	10	7	7	4	2	9	3	2	1	6	1
AUNIP	15	9	25	52	35	44	10	9	19	1	1	3	4	2	5	1	2	1	1	22	19	12	24	24	26	31	32	14	6	12	4	6	1	2	10	1	7	2	4	3	2	1	2	1	4	3	1	2	1
AUP1	40	13	44	70	114	137	19	49	33	3	12	8	8	9	6	8	4	12	5	17	72	47	43	46	36	19	73	32	11	48	16	18	1	5	14	1	13	12	11	16	6	12	4	12	4	3	4	6	3
AURKA	38	13	45	44	115	115	12	26	39	2	2	5	5	3	12	4	2	3	2	18	28	30	33	29	38	22	47	13	10	31	14	3	1	4	16	3	11	7	10	9	6	9	3	13	3	2	4	8	4
AURKAIP1	76	38	82	149	231	216	74	85	86	5	9	9	7	5	4	1	2	5	3	21	49	54	55	53	43	29	71	24	13	41	16	19	1	10	20	8	19	12	10	17	3	2	2	6	1	4	2	16	8
AURKB	5	8	12	13	16	16	4	7	8	4	6	3	1	3	3	3	1	4	2	12	16	26	30	32	28	16	35	12	9	15	5	13	1	1	8	1	4	7	7	9	1	2	2	3	5	1	2	2	1
AURKC	9	11	22	49	44	42	11	15	21	4	2	2	2	1	1	3	1	1	2	13	20	21	24	26	42	25	29	4	4	9	7	7	1	3	5	1	5	2	10	1	2	4	2	4	2	4	4	4	1
AUTS2	10	10	15	30	29	30	19	17	25	1	1	1	2	1	3	1	2	2	1	12	18	22	19	20	21	16	16	6	10	7	4	2	1	4	9	1	7	1	4	1	2	1	1	4	5	4	3	5	1
AVEN	31	12	29	70	67	89	15	27	33	3	3	1	3	1	5	4	3	3	1	9	25	26	20	26	34	27	36	14	8	30	10	3	1	2	7	3	13	7	10	5	2	6	2	10	2	4	3	7	1
AVIL	9	9	14	36	21	26	13	18	13	2	3	5	1	1	2	1	1	5	3	8	11	13	23	17	33	20	24	6	5	6	5	4	1	4	8	2	8	3	2	1	1	1	3	2	2	1	1	9	1
AVL9	23	8	14	45	60	68	12	13	21	2	3	5	1	6	6	2	1	11	1	8	20	16	27	32	17	16	39	9	1	25	8	11	1	2	12	1	4	5	9	9	5	5	2	10	2	1	3	9	3
AVP	11	10	15	22	36	30	3	18	8	1	1	1	3	1	4	2	1	1	1	9	10	7	10	9	13	15	10	5	3	7	2	4	1	2	4	3	2	3	4	3	2	1	1	2	1	3	1	5	1
AVPI1	12	12	26	28	42	48	5	11	14	1	7	9	6	6	5	1	1	3	2	14	27	23	30	29	27	22	42	10	12	15	9	4	1	3	6	2	7	3	1	5	4	2	4	7	2	1	5	8	1
AVPR1A	13	10	12	32	34	42	12	12	18	1	3	2	3	1	7	1	1	4	1	7	16	24	17	31	33	23	27	11	4	8	8	4	1	1	6	3	6	4	3	7	4	4	2	7	1	3	1	5	1
AVPR1B	539	212	413	658	853	947	128	470	364	1	4	4	10	1	5	1	1	7	2	24	51	56	60	52	31	17	65	15	5	31	10	7	1	5	18	4	9	9	8	8	5	5	1	14	2	1	2	5	1
AVPR2	17	18	21	45	46	54	15	15	12	1	1	1	5	1	4	3	2	5	3	11	18	13	16	20	35	24	27	6	5	4	6	1	1	1	8	3	2	4	6	4	8	1	1	8	2	3	2	5	2
AWAT1	16	13	23	53	42	53	16	13	23	1	1	1	1	1	5	4	1	2	1	12	21	14	17	13	35	24	24	9	5	11	6	2	1	1	5	1	7	2	3	6	3	2	4	5	1	1	1	7	1
AWAT2	9	6	6	18	23	29	4	11	10	1	1	1	1	1	2	1	1	1	1	2	14	5	9	15	18	12	5	5	6	3	2	1	1	1	12	2	2	1	2	1	2	1	1	2	1	3	1	8	1
AXDND1	10	5	14	43	27	47	9	9	20	1	1	3	2	1	2	2	1	4	5	7	12	14	14	20	29	19	39	14	2	7	8	4	1	5	17	1	5	2	3	5	1	1	1	1	1	1	3	6	4
AXIN1	24	11	24	49	52	72	9	21	21	4	10	16	4	7	3	3	2	10	3	9	18	19	27	22	33	15	22	28	1	33	11	13	1	4	13	3	7	9	8	19	3	6	4	9	3	4	1	10	2
AXIN2	11	11	17	32	42	42	6	11	21	2	1	3	3	1	4	1	3	7	5	11	20	29	19	16	36	25	27	12	1	7	8	4	1	5	10	1	4	3	6	4	2	5	3	3	5	1	3	8	2
AXL	14	37	22	92	43	59	14	16	61	16	6	5	26	4	6	11	7	8	1	46	34	23	22	34	55	35	41	7	26	10	6	16	1	11	6	5	21	3	55	5	23	6	10	12	10	3	4	4	2
AZGP1	11	11	19	39	58	65	9	23	27	3	19	18	7	7	2	2	1	12	4	10	28	26	29	14	30	23	29	10	4	14	12	1	1	3	23	2	7	13	4	5	3	3	1	3	1	2	1	5	2
AZI2	15	18	20	64	71	61	20	14	28	3	1	11	13	3	6	2	3	4	5	17	13	27	20	18	35	21	34	12	8	17	2	3	1	4	21	1	8	5	5	5	2	6	3	6	4	2	3	3	2
AZIN1	26	33	43	105	140	198	20	38	35	13	20	47	18	8	9	10	7	35	13	20	64	34	45	34	36	29	59	25	8	78	38	31	1	10	15	1	19	20	13	22	13	9	3	25	7	4	7	10	3
AZIN2	8	9	11	19	20	34	7	13	14	1	1	1	2	1	4	1	2	2	1	7	9	3	13	16	18	18	12	2	6	5	4	5	1	1	20	1	4	1	6	1	1	5	1	3	1	1	3	2	2
AZU1	5	7	12	18	15	24	5	10	15	1	1	1	2	1	3	1	1	2	1	5	4	13	9	16	24	17	13	6	2	8	5	1	1	2	8	3	3	1	5	5	1	1	2	6	1	1	1	12	1
B2M	301	100	313	216	901	910	32	305	152	41	51	55	51	12	41	24	18	47	34	100	256	112	118	88	42	38	138	43	34	232	87	65	1	18	21	2	47	25	44	100	64	87	20	53	65	9	4	9	2
B3GALNT1	8	12	25	23	43	45	8	15	27	2	4	3	3	1	3	1	1	1	1	8	22	13	15	27	31	25	29	5	5	5	3	9	1	1	8	1	6	2	2	6	4	1	4	4	3	2	3	15	3
B3GALNT2	8	13	14	38	36	66	10	13	20	5	3	3	4	4	6	3	2	3	3	9	20	13	17	26	20	21	31	15	6	27	7	7	1	3	12	2	7	3	6	6	3	5	3	2	5	1	2	5	2
B3GALT1	13	12	10	40	33	34	11	10	14	1	1	2	4	1	1	3	1	1	4	10	18	17	21	20	32	28	38	6	3	10	9	1	1	5	8	1	5	2	4	3	1	1	3	4	6	3	2	4	1
B3GALT2	13	12	17	36	31	40	8	19	15	1	2	2	2	2	6	1	1	3	1	2	16	14	18	20	21	23	25	7	6	17	7	7	1	2	10	1	11	2	2	5	1	4	2	5	3	2	2	6	2
B3GALT4	4	14	17	32	33	23	6	11	19	2	1	5	2	1	3	1	2	4	5	14	19	13	15	14	21	20	27	7	4	11	5	2	1	1	5	2	5	3	3	2	2	1	2	5	1	1	1	5	3
B3GALT5	40	6	22	32	48	59	8	42	15	2	25	37	1	6	4	1	1	20	10	8	58	50	39	46	21	15	73	22	5	21	27	13	1	2	15	1	7	6	3	4	1	4	1	16	1	5	2	4	2
B3GALT6	14	15	22	53	51	55	9	29	29	1	3	1	3	1	7	3	1	3	2	9	18	18	29	23	39	22	24	11	6	20	7	5	1	1	13	2	9	8	6	6	1	4	5	7	4	1	3	11	2
B3GAT1	42	25	55	114	132	148	29	45	55	2	3	2	3	1	6	1	2	5	2	19	31	31	31	29	33	29	29	10	2	20	8	5	1	4	6	1	9	4	5	4	4	4	5	6	1	4	2	6	3
B3GAT2	23	6	27	40	49	43	12	24	12	2	1	1	1	1	4	1	1	2	1	11	19	14	19	15	22	19	18	6	3	4	1	1	1	2	4	1	3	1	8	1	1	2	1	2	2	3	4	8	1
B3GAT3	23	12	19	41	55	59	16	19	41	4	1	7	7	1	5	3	2	4	5	13	37	22	35	24	40	27	37	47	11	17	8	7	1	3	11	4	16	4	14	5	3	3	4	6	3	4	3	5	4
B3GLCT	10	10	17	44	40	50	12	12	30	1	7	8	4	2	4	1	1	5	1	15	24	20	25	23	44	19	39	11	3	16	10	3	1	3	9	1	8	1	9	5	8	1	2	5	1	1	3	6	1
B3GNT2	15	10	19	38	36	46	11	18	16	4	5	6	1	1	7	3	4	8	2	11	33	12	28	21	32	20	27	15	8	20	7	4	1	2	8	1	6	7	5	7	1	6	1	4	2	6	3	10	3
B3GNT3	59	16	91	40	144	216	9	71	22	2	19	34	3	11	3	1	1	23	5	7	75	41	38	25	16	21	61	34	3	121	24	33	1	8	31	4	8	24	10	26	5	8	1	21	1	4	4	13	2
B3GNT4	9	16	19	28	28	42	13	11	19	1	1	6	3	1	3	1	1	1	1	8	17	15	16	25	27	18	23	12	4	7	4	3	1	1	25	1	3	1	3	4	2	1	3	3	3	1	1	3	2
B3GNT5	20	14	18	43	60	162	9	19	18	3	11	30	12	12	15	4	4	51	8	14	54	26	30	33	34	29	45	25	11	51	14	15	1	4	13	2	10	8	13	39	6	25	4	12	4	4	4	10	4
B3GNT6	12	14	15	28	32	49	10	17	24	3	5	5	3	1	4	1	1	3	2	5	27	22	15	33	21	14	25	40	4	28	7	6	1	8	38	2	2	1	2	7	1	4	2	4	4	1	1	6	4
B3GNT7	8	8	16	28	20	33	9	14	14	1	7	3	1	3	3	5	1	3	1	14	27	25	22	18	26	17	34	8	5	19	6	3	1	3	10	2	5	9	1	12	2	6	1	3	1	1	1	4	1
B3GNT8	22	11	28	46	36	55	15	23	20	3	1	3	3	3	4	2	1	2	1	8	26	29	20	21	28	17	25	5	9	12	7	5	1	1	8	2	2	3	7	4	2	4	3	4	1	1	1	2	1
B3GNT9	142	6	15	44	37	57	8	11	19	1	2	3	1	2	4	1	1	2	1	3	14	19	13	17	16	10	20	6	2	8	6	3	1	4	8	1	6	3	4	2	1	2	2	4	1	1	1	7	2
B3GNTL1	14	13	18	38	34	43	9	11	28	1	2	3	1	2	2	1	1	7	1	6	13	15	18	16	21	17	21	11	5	10	6	1	1	4	13	2	4	2	2	6	5	2	3	2	1	2	1	4	2
B4GALNT1	20	16	28	45	80	105	31	20	32	3	1	3	1	1	3	1	1	1	1	14	16	20	20	20	34	19	24	15	7	11	4	3	1	2	9	1	4	2	3	3	6	5	4	7	2	1	1	6	3
B4GALNT2	14	11	26	37	31	51	13	19	23	1	1	1	2	1	7	1	1	1	3	8	14	9	15	19	28	17	28	11	4	5	4	2	1	3	12	1	6	1	2	4	3	1	3	4	3	2	1	6	1
B4GALNT3	17	17	23	38	37	45	9	21	17	9	10	8	7	3	6	2	2	16	6	13	37	32	36	28	27	19	37	45	6	67	15	18	1	8	19	1	12	14	13	20	8	14	1	10	3	3	4	3	1
B4GALNT4	7	15	18	48	51	48	14	14	18	7	1	3	11	1	7	5	6	2	1	7	20	15	19	19	35	33	21	4	8	15	9	3	1	3	6	1	11	3	4	1	2	4	3	5	3	2	1	11	3
B4GALT1	27	17	54	51	93	127	13	23	26	5	16	35	6	11	8	4	5	37	14	13	30	25	20	26	37	27	41	23	12	51	13	13	1	4	21	2	10	5	11	19	6	9	2	7	5	3	7	16	6
B4GALT2	25	14	38	78	63	79	17	24	37	2	3	11	7	5	6	1	4	8	8	26	47	47	46	44	41	40	46	13	9	23	9	12	1	7	16	4	10	11	9	9	5	7	4	7	2	7	1	11	3
B4GALT3	17	9	35	62	65	77	16	25	23	3	19	17	5	3	9	7	2	14	12	17	23	20	19	22	38	30	39	27	2	51	16	15	1	5	33	1	16	13	10	19	5	12	4	9	1	1	4	6	5
B4GALT4	16	8	18	23	54	58	5	14	10	1	4	4	1	1	3	1	1	4	1	7	22	26	15	12	18	10	15	14	5	28	5	13	1	1	4	1	5	4	4	8	4	5	1	8	1	7	3	4	5
B4GALT5	28	23	52	79	88	160	16	37	38	10	23	39	13	13	12	5	7	43	16	20	91	64	47	43	41	31	72	39	9	98	24	32	1	8	15	4	11	15	29	89	15	70	7	14	7	3	1	11	1
B4GALT6	12	20	15	36	50	41	7	18	23	2	6	1	1	4	2	2	2	6	2	9	23	16	23	30	27	28	32	7	4	11	10	4	1	4	9	3	4	10	3	3	1	1	2	6	3	2	1	3	1
B4GALT7	27	22	26	62	69	81	20	23	27	3	1	3	8	1	3	2	1	6	3	11	23	21	25	22	24	20	26	14	3	23	9	6	1	4	5	2	7	5	1	6	3	3	1	10	4	1	4	3	1
B4GAT1	19	15	15	47	38	56	17	16	27	4	1	4	10	1	3	2	1	4	1	18	19	18	14	20	36	30	26	9	13	21	6	3	1	4	8	1	10	1	5	2	5	1	3	5	4	5	5	5	2
B9D1	24	18	15	41	31	37	4	18	28	2	1	1	6	1	4	2	3	1	1	14	9	15	16	10	23	16	23	1	3	2	9	6	1	13	4	1	6	1	1	3	1	1	1	5	1	1	2	4	2
B9D2	17	14	25	54	56	81	9	28	25	2	4	8	2	2	2	5	2	5	3	9	22	18	20	19	37	22	27	11	5	12	5	4	1	3	8	1	6	4	5	5	2	1	3	6	2	1	1	6	1
BAALC	10	14	15	43	30	58	10	11	25	2	2	1	3	1	3	1	1	1	1	23	14	18	11	23	37	20	33	7	12	4	6	6	1	2	12	1	10	1	10	2	1	1	1	4	1	3	4	7	1
BAAT	8	9	16	32	37	34	7	10	12	1	2	1	1	2	3	2	1	1	2	4	7	16	10	12	20	7	18	4	1	7	4	2	1	3	8	1	4	3	2	4	1	1	1	2	3	2	1	8	2
BABAM1	19	16	31	68	55	78	9	25	28	4	1	6	4	2	2	2	2	4	1	10	25	19	35	24	34	24	23	19	10	33	8	14	1	2	11	3	12	11	8	7	4	3	5	7	5	3	2	2	2
BABAM2	19	14	36	57	77	71	13	33	27	5	9	9	8	3	10	6	6	6	3	16	43	24	27	32	25	32	47	24	13	42	18	10	1	8	25	1	15	14	4	10	2	6	11	13	7	3	4	7	1
BACE1	7	16	14	39	29	43	12	11	22	5	3	3	5	2	5	2	2	5	2	13	15	21	26	13	34	31	22	10	4	9	7	3	1	4	71	2	11	3	7	1	3	1	1	6	2	2	2	5	3
BACE2	143	20	157	99	269	268	12	186	42	5	32	46	5	23	7	2	3	43	14	27	169	104	70	73	30	21	137	57	21	183	37	22	1	10	43	2	26	48	14	37	13	13	10	17	3	2	8	19	5
BACH1	28	31	62	92	169	264	38	22	46	43	8	35	74	11	39	41	37	37	19	16	40	33	31	30	34	36	47	25	19	43	16	17	1	12	20	1	27	6	62	17	39	10	9	10	8	2	4	11	5
BACH2	7	7	14	46	38	32	11	14	13	3	1	6	1	1	5	2	1	5	1	11	17	15	17	17	29	17	20	6	4	8	5	1	1	1	6	4	4	3	2	3	1	1	1	5	4	3	6	2	1
BAD	19	10	16	33	58	68	12	17	28	3	4	2	3	4	5	4	2	5	4	9	28	30	19	27	29	24	49	14	6	12	14	5	1	2	10	2	7	3	8	3	2	5	1	6	6	1	5	6	1
BAG1	7	6	14	19	18	60	8	9	16	1	2	5	1	1	2	4	1	2	1	11	17	19	10	13	24	14	16	7	3	12	5	2	1	1	7	2	6	1	7	2	1	1	2	3	3	1	7	6	1
BAG2	13	10	6	38	37	40	10	9	25	1	4	5	1	1	3	1	1	1	2	14	15	22	12	17	24	24	37	10	6	8	10	5	1	3	5	4	7	3	11	1	6	1	1	5	2	4	1	10	1
BAG3	10	13	13	36	48	64	11	13	19	2	6	3	2	2	2	2	2	6	3	9	25	21	27	24	34	26	35	12	5	16	161	3	1	3	3	4	8	3	8	4	1	3	16	4	4	4	4	10	2
BAG4	28	11	31	44	66	97	17	21	26	6	3	4	1	4	2	2	1	10	6	12	37	28	24	21	34	26	36	19	8	25	13	8	1	4	14	4	9	3	4	10	6	5	5	13	3	2	2	2	2
BAG5	20	11	29	49	68	63	10	21	28	6	5	18	7	9	4	4	5	9	7	9	27	20	27	32	31	25	36	12	7	29	16	9	1	8	9	3	12	4	8	11	2	8	4	14	5	1	2	9	2
BAGE3	26	11	22	59	64	83	21	21	43	8	9	11	10	4	5	5	3	5	5	33	62	44	43	53	25	21	59	33	7	45	18	13	1	4	19	1	18	13	7	23	3	4	4	12	3	1	2	6	1
BAGE5	164	73	180	274	470	504	62	183	121	3	4	5	2	1	3	5	2	6	2	18	38	39	46	39	32	26	61	21	15	25	11	5	1	6	7	3	13	8	9	9	3	6	3	5	6	2	1	5	2
BAHCC1	8	8	11	23	32	40	9	11	18	1	1	2	4	1	1	1	1	2	1	12	24	26	22	17	30	18	27	8	4	18	5	7	1	3	11	1	9	3	4	1	2	4	1	2	3	2	7	9	2
BAHD1	22	13	27	63	51	50	14	18	30	4	5	4	4	2	10	1	3	5	3	9	24	17	22	30	30	23	40	26	8	35	10	3	1	7	16	3	6	6	10	10	3	7	3	11	5	3	4	9	1
BAIAP2	18	19	22	45	53	96	16	18	14	3	4	3	8	2	6	1	1	1	2	6	28	34	26	39	35	19	34	5	4	10	7	1	1	4	15	2	5	5	5	5	7	1	4	7	5	1	3	5	3
BAIAP2L1	34	13	36	52	130	224	18	36	28	1	22	33	1	12	7	3	2	29	9	12	128	76	76	67	24	29	117	112	3	159	54	40	1	5	21	1	10	55	4	94	3	58	1	28	5	2	6	15	2
BAIAP2L2	16	7	18	39	45	55	8	26	24	1	2	2	3	1	3	1	1	1	1	11	33	28	27	23	20	17	37	8	5	10	2	3	1	4	10	1	5	2	6	5	7	2	1	6	3	1	2	2	2
BAIAP3	14	5	20	35	39	44	7	10	18	4	3	8	3	1	4	1	1	3	2	6	17	14	16	16	31	19	20	5	3	8	6	5	1	2	20	2	4	3	4	5	4	3	1	8	2	5	2	4	2
BAK1	28	18	33	33	52	63	9	21	25	5	16	15	4	4	5	1	2	16	7	8	36	26	18	30	22	10	42	17	3	46	11	11	1	3	3	1	16	9	10	25	2	10	2	12	3	3	3	8	2
BAMBI	9	14	29	39	28	51	8	9	23	3	2	1	5	1	2	1	1	4	2	10	24	31	42	25	36	33	21	10	7	12	8	3	1	5	11	1	10	1	4	3	1	2	4	5	8	2	1	4	1
BANF1	22	13	54	77	114	119	14	26	33	7	10	18	13	7	8	4	6	22	16	15	64	30	27	28	22	25	44	15	14	45	29	14	1	8	17	1	17	12	9	16	3	6	3	13	9	4	3	12	2
BANF2	10	9	19	46	40	42	9	16	24	1	1	1	1	1	5	1	1	1	1	3	13	20	14	22	28	25	28	5	4	9	3	2	1	2	11	2	6	1	6	2	3	1	2	4	2	1	4	4	1
BANK1	56	24	70	108	184	227	31	70	49	3	6	6	4	2	11	1	1	5	3	13	29	31	28	30	57	31	48	13	6	15	13	1	1	10	21	4	15	4	7	3	2	6	6	4	1	4	2	7	4
BANP	11	18	20	46	53	46	4	24	23	3	4	6	7	2	5	4	2	9	1	12	14	21	13	21	26	21	49	18	8	18	8	7	1	5	21	1	2	7	5	7	1	8	3	10	1	1	1	7	4
BAP1	17	15	22	55	41	42	9	20	29	3	4	8	7	4	6	2	2	7	2	16	33	26	36	30	31	26	31	14	4	49	21	10	1	6	23	3	10	8	9	17	7	4	7	10	5	4	3	4	4
BARD1	8	13	17	43	34	36	6	13	22	4	9	7	2	4	8	1	1	4	6	13	19	13	24	20	30	25	28	10	2	11	5	9	1	6	7	1	4	1	7	4	1	2	3	6	1	3	3	6	1
BARHL1	8	13	9	34	36	37	9	14	19	2	1	1	3	1	4	1	1	1	1	6	7	14	10	9	23	12	25	3	2	11	3	4	1	1	6	1	5	1	2	5	2	1	2	5	2	1	3	6	1
BARHL2	791	388	852	1284	1655	2041	246	767	714	23	38	52	32	23	22	15	17	59	24	202	652	777	626	712	250	220	1007	249	66	263	188	102	1	58	88	64	117	78	59	81	31	51	46	116	50	4	9	16	8
BARX1	10	5	15	23	25	31	12	4	8	1	1	4	2	1	1	1	2	3	1	12	16	15	15	24	23	18	21	8	3	6	3	1	1	2	4	1	6	3	6	6	1	1	4	2	2	1	3	4	1
BARX2	8	8	12	18	54	44	8	8	12	1	1	8	4	1	3	1	1	10	1	9	25	24	14	10	11	14	25	3	4	9	4	2	1	2	13	2	5	3	2	2	3	1	1	4	2	9	10	13	8
BASP1	3385	1803	5335	8209	9659	10274	1250	3322	3255	46	83	95	53	35	33	28	26	98	59	285	972	1018	906	925	421	307	1419	502	116	475	309	216	1	111	205	95	199	138	116	170	60	86	74	235	75	22	29	45	12
BATF	11	15	19	25	39	53	9	20	24	1	2	1	1	2	2	1	1	3	1	3	16	10	16	14	22	16	19	14	6	10	5	1	1	6	5	2	7	2	3	3	3	4	2	4	2	5	2	10	2
BATF2	10	4	19	28	32	46	8	12	9	2	1	2	1	1	6	1	2	1	2	8	12	12	13	8	23	14	20	4	1	6	2	3	1	1	9	1	8	1	5	2	2	1	1	1	1	1	1	5	1
BATF3	24	19	31	49	48	86	20	25	27	5	3	2	3	1	4	1	1	4	1	14	19	11	17	24	40	20	24	19	10	13	5	3	1	3	6	1	11	5	3	4	6	3	4	4	6	2	3	7	2
BAX	22	11	23	47	46	35	5	18	18	3	4	12	4	4	8	1	3	12	2	11	24	11	27	21	34	14	34	10	2	20	9	5	1	9	9	1	8	11	8	10	5	2	3	6	2	5	4	12	2
BAZ1A	23	16	18	32	38	40	6	14	25	6	5	4	3	1	6	1	3	5	3	6	24	17	13	32	36	20	33	9	5	29	8	4	1	4	8	1	3	5	11	12	3	4	5	6	4	3	4	3	1
BAZ1B	18	17	24	46	48	77	13	17	23	4	9	15	7	5	5	6	5	12	13	17	28	28	25	22	28	27	30	18	9	32	11	11	1	4	11	1	13	10	12	13	6	11	5	9	2	2	4	7	2
BAZ2A	19	11	19	41	53	65	7	20	24	3	8	11	5	6	2	1	1	15	11	17	37	16	18	40	30	23	41	17	7	26	7	6	1	3	17	3	9	13	7	7	5	6	4	4	7	2	2	2	1
BAZ2B	14	12	23	40	38	57	7	11	15	4	3	11	5	1	4	4	5	11	4	8	29	23	16	22	32	27	32	11	4	46	10	4	1	1	16	1	8	9	6	6	1	7	2	10	2	4	1	5	1
BBC3	10	5	13	22	28	28	6	9	6	1	1	2	1	1	2	2	2	1	2	7	23	12	7	17	16	11	22	9	3	15	6	3	1	4	5	1	5	1	1	1	6	2	1	5	1	1	2	8	2
BBIP1	19	11	28	78	53	75	11	24	32	4	15	12	10	5	2	2	2	17	4	15	24	22	18	33	34	21	44	19	7	27	9	10	1	2	8	1	9	7	10	17	5	2	3	7	1	3	2	9	1
BBLN	22	10	34	62	70	101	11	36	17	4	20	33	3	9	6	1	2	44	26	11	51	35	44	45	33	20	41	17	4	56	11	22	1	7	13	1	14	6	4	9	1	4	2	13	3	7	5	29	3
BBOF1	20	11	27	43	39	50	8	12	15	1	3	4	2	2	3	1	1	3	3	4	21	14	16	19	24	18	20	15	13	9	3	4	1	3	7	1	7	4	3	7	1	1	3	5	5	1	2	9	4
BBOX1	12	6	11	24	19	29	2	5	15	1	1	1	1	1	3	1	3	1	1	1	6	8	2	10	13	10	13	6	1	8	5	3	1	1	1	1	1	1	3	2	1	3	1	4	1	1	1	2	1
BBS1	23	8	21	39	38	73	16	26	23	1	1	5	3	1	1	1	1	4	1	8	15	15	15	19	27	24	36	8	4	11	3	3	1	1	5	2	4	2	1	1	4	1	3	3	2	1	3	1	3
BBS10	7	13	14	33	29	28	11	6	21	2	2	1	1	1	5	1	1	5	1	11	14	24	17	15	27	33	29	5	2	11	5	4	1	3	5	1	4	5	3	3	1	1	2	3	2	1	3	9	3
BBS12	13	7	23	35	42	54	11	15	18	1	1	2	4	1	6	1	1	2	1	10	17	18	12	20	35	28	37	7	5	6	2	1	1	3	6	2	8	2	6	4	5	1	3	4	1	2	1	1	1
BBS2	18	20	35	53	55	72	23	21	30	8	4	7	10	1	9	3	4	7	2	18	18	32	24	22	41	32	27	5	12	25	9	2	1	8	15	1	10	10	8	11	2	1	3	5	5	1	5	6	1
BBS4	17	7	22	37	34	50	6	16	19	3	1	1	2	1	5	2	1	4	1	9	19	17	23	22	31	23	35	4	7	6	4	1	1	3	17	5	7	2	4	6	1	1	4	1	4	2	1	5	2
BBS5	10	8	10	34	31	44	10	6	18	3	1	3	1	1	5	2	1	4	1	9	12	13	17	15	19	27	30	3	4	16	3	3	1	4	6	2	2	2	1	5	3	1	1	3	2	1	1	4	1
BBS7	15	13	17	53	35	47	9	15	15	3	3	1	5	1	6	1	1	2	1	11	20	19	14	15	23	28	30	5	6	15	4	3	1	8	8	5	3	2	7	4	1	1	2	5	2	3	1	5	2
BBS9	7	10	16	29	18	36	3	10	7	1	1	2	3	1	3	1	3	1	1	6	4	10	7	5	16	7	12	5	5	7	2	1	1	4	2	1	4	2	2	2	1	1	1	8	2	1	4	4	2
BBX	17	21	20	46	51	69	13	19	34	2	4	15	14	2	5	3	3	8	6	19	34	20	18	26	39	32	43	10	6	42	17	7	1	1	19	1	15	7	9	8	4	4	3	8	2	3	2	7	3
BCAM	8	8	12	30	44	48	12	12	18	2	6	8	4	5	9	3	1	18	22	11	29	53	39	38	31	27	48	8	4	5	6	12	1	2	22	2	10	7	2	5	5	6	2	4	6	4	2	7	3
BCAN	16	14	22	34	28	40	9	19	21	1	1	6	1	1	3	4	1	2	1	11	14	15	14	33	39	19	32	11	8	8	6	5	1	4	10	2	5	1	5	2	1	2	3	4	2	4	1	4	1
BCAP29	16	17	17	30	33	49	5	17	29	4	6	9	5	2	4	3	1	6	9	14	40	37	21	31	18	25	41	14	2	32	13	8	1	2	9	3	7	3	11	8	2	6	2	6	6	3	4	4	5
BCAP31	43	18	47	67	108	109	13	24	35	3	12	22	8	17	9	3	2	28	13	19	103	65	66	61	32	30	83	48	14	152	55	78	1	11	40	2	21	40	12	38	6	24	6	53	11	3	9	8	6
BCAR1	17	9	27	42	69	109	11	15	19	9	6	10	2	7	4	2	1	14	4	11	49	52	51	54	27	21	54	25	9	62	17	7	1	4	12	1	12	12	14	23	7	10	3	11	4	4	1	7	4
BCAR3	17	15	18	49	40	70	13	14	27	3	4	13	7	1	8	4	3	6	9	13	44	35	45	48	42	30	29	34	5	26	14	17	1	9	16	1	8	4	5	21	5	19	5	9	8	5	3	8	3
BCAS1	26	15	17	43	58	78	7	21	18	5	9	14	1	1	2	1	1	3	5	8	91	38	27	40	25	13	50	77	6	89	23	19	1	3	47	1	9	19	5	4	3	2	6	5	1	1	2	8	4
BCAS2	14	12	12	37	48	53	22	8	19	2	8	1	6	3	5	3	5	8	5	13	20	18	22	30	45	25	27	13	5	25	16	6	1	2	10	2	13	4	11	6	12	5	4	10	3	2	1	5	4
BCAS3	46	21	45	61	103	99	19	40	43	2	4	6	12	2	12	4	2	11	3	24	57	37	42	50	45	27	71	13	11	25	11	8	1	3	9	1	14	5	10	3	8	5	2	8	2	4	4	4	3
BCAS4	10	5	9	39	38	37	13	15	19	1	2	4	1	1	4	2	2	3	1	7	16	8	20	24	34	18	30	5	8	8	4	1	1	2	7	1	8	2	6	3	1	2	3	7	1	1	2	9	2
BCAT1	13	17	21	33	63	76	9	12	23	1	5	11	4	10	6	4	1	10	1	9	23	14	19	20	25	23	24	5	4	15	9	17	1	6	21	2	4	2	6	5	3	5	1	4	2	1	1	3	1
BCAT2	9	14	27	52	29	56	16	17	27	5	6	9	1	1	10	1	3	6	5	6	34	13	22	17	25	31	29	11	7	27	10	6	1	1	14	6	8	4	6	4	5	4	3	2	4	2	5	8	1
BCCIP	21	11	41	58	82	86	16	24	32	7	7	14	10	6	4	3	2	9	4	12	52	39	37	29	30	28	45	17	5	32	12	13	1	2	20	4	10	3	12	17	5	6	6	10	4	2	2	11	2
BCDIN3D	7	11	12	39	31	26	8	8	17	1	2	2	1	1	6	1	1	2	1	4	12	9	11	13	15	11	16	2	2	7	5	4	1	3	5	1	3	1	1	2	1	1	1	4	2	3	2	3	2
BCHE	10	7	16	23	42	32	9	10	24	2	1	1	1	1	5	1	1	1	1	9	12	21	15	30	29	23	28	12	2	8	9	2	1	1	4	3	5	1	2	1	1	1	2	2	3	1	1	3	3
BCKDHA	11	9	16	38	33	40	7	8	17	3	3	4	5	3	7	1	1	12	10	6	16	18	27	24	39	18	28	9	2	20	6	9	1	3	7	2	9	5	5	3	7	3	1	3	3	5	4	8	1
BCKDHB	10	7	16	38	34	49	9	12	19	3	8	6	4	6	7	1	1	7	3	13	18	21	24	25	34	26	18	10	4	21	15	8	1	1	10	2	9	5	8	5	7	3	3	7	4	2	1	11	3
BCKDK	9	13	17	39	35	38	16	17	15	1	5	8	4	3	7	3	1	9	4	10	15	15	26	16	23	27	27	10	8	11	3	8	1	3	5	4	2	3	2	6	2	1	2	9	3	3	2	5	3
BCL10	11	16	33	33	100	171	9	23	29	6	22	19	5	12	5	1	2	22	15	22	81	41	23	51	46	30	69	44	8	91	68	10	1	4	30	1	9	11	12	37	3	14	6	8	4	2	2	9	3
BCL11A	11	12	20	24	30	33	7	11	23	1	1	2	1	2	3	1	1	3	3	10	20	21	14	17	25	23	24	6	2	12	8	7	1	2	8	2	7	1	1	3	1	3	1	4	2	2	4	7	2
BCL11B	12	14	15	39	37	41	14	14	28	1	1	3	2	3	8	1	1	1	1	9	27	19	15	17	18	16	28	11	4	15	12	6	1	2	15	3	4	4	2	7	2	2	3	6	2	3	4	5	1
BCL2	10	20	16	37	28	34	11	9	23	5	1	1	10	1	15	6	6	2	1	20	8	15	15	14	45	33	21	6	7	6	5	2	1	6	7	1	15	3	5	1	8	1	1	2	1	1	1	3	1
BCL2A1	19	17	23	52	51	62	10	23	26	6	2	1	9	2	5	1	1	3	1	6	17	18	24	18	30	19	23	4	2	10	5	3	1	4	10	1	7	1	8	7	10	1	2	4	4	2	1	8	1
BCL2L1	44	11	60	40	170	193	13	46	32	6	23	31	7	19	5	6	5	28	9	10	78	74	71	43	31	21	72	20	6	44	11	25	1	8	12	2	10	18	18	24	5	23	6	10	9	5	19	30	13
BCL2L10	15	15	18	43	26	48	9	16	23	1	1	2	4	1	4	1	1	1	1	11	23	16	19	19	38	25	37	6	8	9	2	1	1	1	16	1	11	2	2	3	1	3	2	5	1	1	3	5	5
BCL2L11	21	15	22	59	62	63	11	17	26	1	1	3	2	1	2	4	3	6	3	17	20	29	21	20	21	23	37	19	6	22	17	3	1	4	28	4	7	7	6	4	3	6	1	10	3	3	2	6	4
BCL2L12	14	8	14	35	37	37	9	20	15	3	4	7	2	5	3	1	1	3	4	11	19	27	15	20	25	25	27	14	6	15	6	9	1	5	12	1	2	7	3	2	4	3	2	5	1	4	3	3	2
BCL2L13	14	12	11	60	31	55	13	22	33	3	1	4	6	4	3	2	1	7	3	12	29	23	20	19	38	31	42	17	7	8	7	10	1	2	14	1	13	11	14	10	2	4	4	3	6	5	3	7	1
BCL2L14	74	28	88	100	148	210	40	70	54	4	7	19	6	3	9	2	2	13	8	21	85	57	55	53	42	40	109	67	13	77	24	17	1	13	43	3	20	35	6	26	7	13	5	28	3	1	4	7	1
BCL2L15	17	9	17	29	40	35	14	17	29	2	5	3	2	1	3	3	1	1	2	11	21	15	21	21	29	24	27	15	3	33	10	6	1	3	11	3	8	7	3	14	3	5	1	5	1	4	2	4	3
BCL2L2	805	382	717	1011	1361	1857	236	907	707	23	32	52	30	17	21	19	13	56	23	76	160	116	116	102	84	58	150	93	46	154	53	45	1	28	48	3	53	53	50	64	20	27	11	28	18	9	11	31	4
BCL3	18	15	22	38	62	89	22	16	28	13	18	47	17	19	13	7	7	20	10	10	57	41	46	35	23	20	82	19	7	79	11	19	1	1	44	1	11	12	17	51	6	17	1	10	5	5	6	13	3
BCL6	14	15	13	31	31	68	15	16	16	9	6	11	15	4	11	3	5	12	3	12	23	13	19	25	28	13	37	8	12	30	5	6	1	5	9	1	8	8	8	9	2	5	3	11	1	2	3	4	3
BCL6B	14	14	29	46	55	34	8	16	35	2	1	3	3	1	1	1	1	1	2	11	22	19	11	19	19	17	33	7	7	14	7	1	1	2	6	1	5	1	4	4	5	2	1	4	2	1	2	4	1
BCL7A	8	6	13	32	34	37	3	8	8	2	4	4	3	1	2	1	1	3	4	4	13	7	13	18	19	14	18	11	6	9	2	3	1	1	4	1	4	3	2	4	3	1	2	5	1	1	1	7	2
BCL7B	16	8	18	56	45	47	6	20	16	5	10	6	12	3	8	6	3	8	5	8	46	28	26	22	38	23	47	28	8	42	26	7	1	3	13	1	11	13	9	13	7	11	3	9	2	2	2	6	4
BCL7C	41	25	33	82	64	91	20	37	51	11	13	29	12	8	13	6	5	30	5	25	51	43	55	37	36	32	57	21	12	46	24	21	1	14	21	1	11	13	12	17	8	9	6	23	11	1	10	10	3
BCL9	18	22	24	51	49	60	12	16	28	4	5	3	7	4	2	1	4	10	3	16	17	24	21	25	21	23	37	19	3	22	8	9	1	3	13	1	10	11	9	4	1	6	3	5	5	2	2	6	1
BCL9L	21	12	32	34	92	132	12	26	25	1	14	15	4	8	8	2	2	15	8	6	57	35	43	42	29	31	57	15	13	24	11	11	1	5	9	2	7	7	5	19	2	7	5	10	2	2	3	9	3
BCLAF1	12	7	20	45	45	46	6	7	20	3	12	9	10	5	7	6	1	11	4	18	22	18	19	14	20	15	20	13	3	43	15	6	1	6	12	1	9	7	3	8	1	3	2	14	5	5	2	8	2
BCLAF3	15	8	14	36	41	54	7	14	14	2	3	6	2	1	2	1	1	7	5	6	31	30	9	26	24	21	36	11	2	17	4	4	1	4	4	2	8	4	2	3	3	4	1	7	2	2	1	9	2
BCO1	19	13	22	41	40	41	6	18	23	1	3	3	4	1	2	1	1	1	2	9	16	7	21	19	29	25	30	9	6	11	6	5	1	4	12	1	2	4	5	6	2	3	2	4	1	1	2	4	1
BCO2	18	12	26	43	27	54	11	14	19	4	2	2	2	1	3	1	2	1	1	9	17	18	10	20	32	20	27	7	6	10	9	3	1	2	11	1	7	1	8	7	1	1	3	5	5	4	1	6	2
BCOR	5	7	11	26	18	19	9	14	19	1	1	1	3	1	5	1	1	1	2	5	13	12	13	17	27	21	29	1	4	9	1	2	1	2	24	1	8	3	5	2	2	3	3	5	3	1	3	4	3
BCORL1	13	16	15	35	28	71	10	17	16	3	1	7	3	1	5	3	2	9	5	15	31	19	10	20	42	37	28	9	4	14	4	7	1	8	8	4	5	2	6	4	3	6	1	12	2	1	1	6	1
BCR	17	3	33	45	47	57	7	30	21	5	3	8	3	1	4	2	1	5	2	15	60	40	54	41	22	17	64	17	4	18	5	18	1	7	9	1	5	7	3	5	2	2	3	6	4	4	5	7	3
BCS1L	24	10	19	37	51	48	17	18	35	4	6	12	5	2	7	2	3	5	5	17	20	38	25	23	30	33	38	11	8	42	9	9	1	5	11	3	13	7	9	4	3	3	1	10	5	1	2	4	2
BDH1	13	7	10	33	34	37	7	9	18	1	5	4	3	2	3	1	1	1	2	2	22	18	11	21	25	20	23	17	1	21	6	5	1	2	9	2	4	6	1	8	1	2	2	2	3	1	2	6	1
BDH2	8	15	20	52	44	65	8	16	29	1	3	2	4	3	7	2	3	4	1	15	21	19	14	27	36	19	32	5	8	15	11	11	1	5	10	1	8	9	2	4	4	3	6	7	6	2	3	12	3
BDKRB1	7	4	16	28	22	35	9	11	26	1	2	1	2	2	6	1	1	2	1	3	13	26	12	17	19	27	18	4	4	4	8	8	1	3	10	1	7	1	3	4	1	2	1	3	5	3	1	7	2
BDKRB2	12	13	18	36	34	37	6	13	19	1	2	1	4	1	1	1	2	2	1	10	19	14	13	21	35	24	25	3	7	8	8	1	1	2	8	1	4	1	4	4	1	1	3	3	3	1	4	7	4
BDNF	10	9	7	50	32	28	7	10	17	1	1	3	3	1	2	1	1	1	1	6	13	14	12	17	24	14	23	4	4	10	4	1	1	1	7	2	4	2	2	3	1	2	2	4	1	1	1	2	1
BDP1	6	16	14	32	56	53	14	13	30	2	7	7	9	4	5	5	3	10	6	13	17	19	18	22	31	31	27	14	4	25	12	4	1	4	11	4	9	9	5	9	1	3	3	7	3	2	2	8	3
BEAN1	28	14	23	61	72	84	14	15	27	3	1	2	3	1	9	1	1	1	2	12	15	22	14	18	41	23	41	8	2	14	5	6	1	2	8	3	6	4	3	2	2	2	2	6	5	2	2	4	1
BECN1	32	16	33	72	78	101	15	35	35	7	10	12	4	8	7	5	5	9	10	12	33	35	29	27	47	29	55	19	4	39	13	8	1	9	16	1	9	8	11	6	8	10	3	13	6	1	4	5	1
BECN2	20	15	18	41	43	50	17	16	17	1	2	4	2	1	4	1	1	2	2	6	10	12	17	12	23	24	22	6	5	9	6	3	1	1	4	3	2	2	2	5	3	1	3	3	3	1	2	9	1
BEGAIN	31	14	27	82	92	113	25	28	50	2	1	3	6	1	2	1	1	3	1	11	21	22	20	24	27	26	33	8	5	11	5	6	1	4	7	5	8	4	3	8	1	1	2	7	2	16	18	41	20
BEND2	8	12	4	31	42	39	7	13	19	1	1	1	1	1	4	1	1	2	1	6	12	8	10	15	22	11	21	1	3	3	2	1	1	2	19	1	3	1	5	2	1	2	2	3	2	1	3	5	3
BEND3	15	7	15	49	30	46	15	12	24	1	1	1	1	1	4	1	2	2	2	14	20	22	26	23	34	24	34	11	6	5	7	2	1	6	16	3	8	3	2	4	1	1	1	4	1	1	4	1	1
BEND4	6	13	10	40	41	47	8	5	18	1	1	1	4	1	3	1	3	1	1	6	14	15	19	10	30	25	30	12	6	9	1	7	1	3	10	2	4	1	3	4	1	2	1	2	2	5	1	7	3
BEND5	8	5	7	24	37	43	3	11	13	1	1	1	2	1	5	1	1	2	2	11	13	18	17	17	26	20	21	3	5	9	5	2	1	2	7	2	5	2	3	3	1	2	3	9	4	3	3	4	2
BEND6	16	12	9	34	38	43	13	15	23	1	1	2	5	1	3	1	2	2	1	14	20	14	25	23	27	27	24	8	4	10	6	1	1	6	10	4	6	2	8	2	1	1	2	4	223	1	1	7	3
BEND7	26	17	32	52	73	85	10	33	26	1	6	3	2	2	4	2	1	4	1	12	29	20	19	23	17	17	44	15	5	20	11	12	1	2	12	1	5	7	6	6	3	4	2	6	2	1	1	7	2
BEST1	11	18	16	46	44	50	10	14	35	1	2	1	6	1	12	5	11	1	1	10	16	17	21	29	45	21	39	7	7	8	5	5	1	2	11	2	3	1	7	7	1	2	6	2	4	3	7	7	2
BEST2	11	17	32	36	34	42	18	15	23	1	1	1	3	2	1	2	1	2	1	8	15	22	16	18	21	27	35	7	4	7	2	2	1	2	4	1	4	1	4	2	4	1	7	4	1	2	3	13	4
BEST3	9	16	14	34	44	50	15	13	19	1	2	1	1	2	5	2	1	2	1	10	13	20	26	19	29	27	35	4	1	10	6	3	1	4	7	1	9	1	2	1	3	2	5	4	3	2	3	6	3
BEST4	12	10	17	29	24	40	7	13	16	3	1	1	5	1	4	1	1	1	2	8	15	20	11	24	37	22	27	7	4	13	10	2	1	3	8	1	3	6	6	4	4	1	1	2	3	2	1	7	1
BET1	17	9	16	46	38	45	12	13	20	1	3	2	5	1	2	1	1	2	2	11	31	14	25	22	28	29	35	13	6	20	9	4	1	2	12	1	7	4	5	5	6	3	1	9	2	5	2	2	1
BET1L	12	9	19	39	43	71	14	15	26	10	19	22	9	7	10	3	6	28	2	16	54	34	26	25	36	39	47	27	5	47	15	6	1	7	23	1	12	13	8	7	6	4	4	10	5	5	6	6	1
BEX1	18	9	17	38	25	29	9	7	16	1	1	1	4	1	2	1	1	1	1	12	18	11	14	16	28	12	27	7	5	2	2	4	1	2	5	2	4	1	5	3	1	1	2	2	1	3	4	9	2
BEX2	21	13	21	40	46	65	10	20	27	2	5	7	3	1	3	3	1	7	6	9	29	18	30	28	25	22	34	2	7	8	11	3	1	10	5	2	9	2	3	2	5	1	4	7	1	5	2	8	7
BEX3	13	18	18	85	53	56	2	9	35	2	5	3	7	2	8	1	1	3	3	29	25	19	18	19	31	22	31	11	16	19	3	5	1	8	15	2	17	5	5	2	3	1	3	5	5	7	8	19	7
BEX4	8	10	19	49	30	31	10	11	25	6	2	5	9	1	3	2	2	8	5	8	21	17	16	25	47	33	34	14	7	9	2	3	1	8	5	1	16	5	10	3	4	2	2	9	5	4	3	6	4
BEX5	9	10	11	32	23	33	4	12	13	1	1	1	1	1	4	1	1	2	1	2	9	14	14	8	15	14	6	6	7	7	3	1	1	2	9	2	1	1	5	4	1	1	1	5	1	1	1	1	2
BFAR	16	7	13	26	36	36	13	15	23	2	9	5	1	1	4	1	1	6	3	7	23	13	16	18	14	11	34	7	10	13	10	7	1	1	10	2	8	3	4	3	3	2	4	2	1	1	3	9	2
BFSP1	16	12	14	33	35	39	6	14	16	1	1	1	6	1	7	1	1	2	1	8	12	12	13	20	21	23	25	7	2	14	6	3	1	3	8	2	10	1	2	3	7	1	1	4	1	2	1	8	3
BFSP2	9	14	13	47	48	50	7	13	16	1	2	1	2	1	4	2	1	2	1	4	10	14	16	20	26	26	18	6	9	17	5	1	1	1	14	2	1	1	6	4	2	1	3	3	2	2	3	7	1
BGLAP	14	10	20	43	42	53	12	16	20	4	3	6	4	8	2	2	2	8	3	21	21	20	22	22	39	19	36	19	7	18	7	4	1	4	9	2	9	3	9	9	4	5	3	13	2	1	1	6	1
BGN	35	44	68	68	101	116	10	76	65	34	10	34	24	9	10	1	1	63	16	34	34	28	37	47	30	24	56	33	9	16	8	41	1	105	14	2	48	7	145	13	66	21	8	26	15	10	14	18	8
BHLHA15	16	12	20	28	29	44	8	19	16	2	1	4	1	1	4	2	1	2	1	8	11	20	14	21	18	16	18	9	2	9	7	3	1	1	9	1	3	3	5	3	1	1	3	5	2	1	2	6	5
BHLHA9	7	3	11	14	18	17	5	6	8	1	1	1	2	1	1	1	2	1	1	3	11	5	6	9	18	10	9	2	3	1	1	1	1	1	5	1	6	1	1	1	2	1	1	1	2	3	1	2	1
BHLHB9	5	9	30	22	25	24	5	9	19	1	2	1	4	1	1	1	1	2	1	8	7	10	10	10	17	13	16	1	6	3	1	2	1	1	5	1	3	2	3	1	1	1	2	2	1	1	1	5	3
BHLHE22	8	13	11	31	36	39	9	15	19	1	3	1	3	1	6	1	1	1	1	4	21	18	14	15	26	25	15	7	5	10	4	3	1	3	11	1	2	1	3	1	3	1	1	1	3	2	4	5	4
BHLHE23	80	40	96	157	195	237	40	58	76	2	5	6	4	1	5	1	2	3	1	14	28	33	39	29	26	25	40	14	3	12	4	8	1	3	5	1	6	5	5	4	3	1	5	8	2	4	1	6	1
BHLHE40	25	19	46	62	112	131	21	21	40	12	32	52	10	15	11	6	4	81	34	18	58	36	30	28	24	19	65	41	12	59	28	41	1	10	33	2	25	17	16	22	9	29	4	27	5	2	2	6	1
BHLHE41	19	13	24	46	42	53	8	17	18	4	8	8	6	1	7	1	2	6	6	15	39	22	16	17	30	20	46	16	10	39	15	15	1	6	9	3	8	5	8	6	6	2	3	16	6	3	3	6	3
BHMT	14	14	7	32	38	49	5	11	13	3	5	3	3	1	6	2	1	2	1	6	19	20	7	19	22	11	21	5	7	8	5	2	1	1	5	1	4	1	4	3	3	2	1	3	3	1	2	5	1
BHMT2	18	11	18	31	26	45	10	18	16	2	1	4	3	1	3	1	1	2	1	11	13	9	18	21	26	26	34	7	4	8	4	4	1	2	5	2	9	1	4	3	3	1	4	3	3	1	1	6	1
BICC1	7	5	14	21	21	23	8	9	12	4	1	2	1	3	3	1	1	6	2	10	7	6	12	11	19	20	14	6	6	7	2	3	1	1	9	2	6	4	3	2	1	1	3	1	3	1	3	7	3
BICD1	178	49	127	186	250	208	36	152	75	10	5	10	18	2	5	5	4	14	7	24	35	30	39	25	35	39	53	33	11	44	15	18	1	9	33	3	19	12	9	17	13	13	13	16	9	2	3	7	2
BICD2	18	12	31	54	68	84	16	31	37	6	3	3	3	2	7	1	2	1	3	13	22	16	26	22	20	17	20	5	5	12	4	2	1	1	11	1	8	5	1	1	3	1	3	1	1	3	2	7	1
BICDL1	14	13	13	27	40	51	10	15	18	1	3	4	2	1	3	1	1	9	1	7	37	22	30	17	35	16	35	20	6	15	12	11	1	3	14	1	3	4	6	15	2	6	3	6	3	3	1	8	2
BICDL2	46	21	55	74	111	146	19	50	52	5	15	25	5	13	6	1	1	19	17	10	55	60	55	62	31	22	92	51	9	80	15	20	1	2	20	1	7	22	9	28	4	14	2	28	6	5	3	9	1
BICRA	20	16	19	38	62	54	15	14	31	9	3	4	11	1	11	2	2	6	3	9	27	28	28	25	27	23	35	13	13	27	15	6	1	3	17	1	14	6	10	18	6	13	5	3	8	3	1	4	5
BICRAL	17	15	20	33	22	37	7	8	17	2	4	3	3	2	4	4	2	2	3	8	21	16	22	13	35	18	27	11	5	25	7	10	1	3	18	1	8	2	6	2	3	3	2	4	4	1	1	6	2
BID	17	5	11	20	42	27	6	7	11	3	8	14	1	3	5	3	2	8	4	5	29	24	22	21	20	16	37	13	2	16	18	15	1	1	7	1	5	9	3	6	1	4	3	6	4	2	5	9	3
BIK	32	11	57	31	236	234	8	32	16	1	7	7	3	6	2	1	1	7	4	9	49	25	26	21	23	32	50	12	5	32	15	22	1	2	12	4	5	12	4	23	4	9	3	12	2	1	2	4	2
BIN1	26	15	19	73	40	48	14	12	40	8	2	5	17	3	14	4	4	6	5	39	26	32	18	25	48	28	46	9	7	14	8	7	1	5	5	4	22	2	17	3	6	4	6	4	3	6	1	9	5
BIN2	14	10	16	41	37	46	6	10	20	1	2	1	2	2	4	1	2	5	2	12	16	12	19	13	24	16	25	6	7	3	8	3	1	3	27	4	6	1	3	4	1	1	4	3	5	1	1	2	2
BIN3	16	12	15	42	44	42	17	6	21	3	5	6	4	6	10	3	3	6	2	14	31	13	18	24	36	29	35	6	5	21	9	10	1	2	8	3	12	3	12	7	8	8	2	9	6	4	2	9	1
BIRC2	14	17	36	66	49	78	8	15	26	9	8	6	16	4	5	6	8	12	7	10	44	21	16	34	32	23	43	13	13	32	5	5	1	5	13	1	21	5	12	7	12	9	2	6	2	3	4	4	1
BIRC3	29	24	60	99	172	307	16	29	36	9	4	5	5	3	12	8	8	10	3	9	30	12	20	22	34	30	41	4	6	14	2	5	1	2	8	1	6	3	6	8	8	8	1	3	3	1	1	3	2
BIRC5	101	69	113	168	272	331	45	103	113	15	43	64	25	33	12	7	9	54	24	20	82	66	48	58	55	42	85	36	19	114	37	25	1	11	36	3	25	31	15	55	9	23	10	13	11	1	8	6	4
BIRC6	18	13	19	40	57	67	9	20	25	4	3	9	7	4	6	2	2	8	2	14	45	34	29	26	34	17	37	23	14	40	7	11	1	5	14	1	15	10	10	11	5	7	2	13	2	4	1	2	1
BIRC7	9	11	6	33	34	37	10	10	20	3	1	3	2	2	2	2	2	7	1	5	21	9	14	18	31	21	33	5	9	14	5	2	1	2	4	1	4	2	4	2	1	1	1	3	4	2	1	5	2
BIRC8	9	11	15	46	33	46	5	14	16	1	1	1	4	1	1	1	1	1	1	8	13	21	16	12	13	15	28	8	5	6	3	5	1	1	11	1	6	1	3	2	1	1	1	2	1	3	3	4	2
BIVM	15	15	19	43	43	43	10	21	22	2	2	3	3	1	4	1	1	3	2	10	14	17	27	23	32	21	26	12	4	14	12	6	1	2	9	3	9	8	7	3	1	1	1	8	4	1	1	7	5
BLCAP	36	22	46	47	71	98	16	47	28	2	22	30	9	17	6	3	1	15	8	18	62	52	30	33	34	20	77	42	7	85	12	42	1	7	33	2	11	31	11	28	5	13	4	21	4	4	7	10	1
BLID	11	10	17	43	31	42	13	10	23	1	1	1	1	1	1	3	1	1	1	9	11	14	21	12	42	21	37	7	6	7	5	6	1	4	15	3	4	1	11	1	4	2	3	5	3	2	1	9	1
BLK	11	6	11	33	32	27	9	9	17	1	1	1	3	2	4	1	2	1	1	2	15	9	17	19	26	15	27	10	5	7	5	6	1	1	6	1	4	1	3	2	2	1	2	2	4	2	3	7	1
BLM	10	5	16	37	42	33	8	14	17	1	2	3	2	1	1	1	2	1	3	10	17	10	18	17	26	21	22	10	5	6	7	1	1	1	13	2	5	1	3	4	4	1	3	7	1	2	2	8	3
BLMH	24	19	29	72	68	90	22	30	47	1	5	1	5	1	2	3	1	2	2	20	35	22	22	33	39	31	33	14	7	8	7	4	1	1	9	1	5	5	11	2	2	1	5	7	4	1	3	2	2
BLNK	18	12	15	27	43	53	5	32	18	2	1	6	3	1	8	1	1	3	1	13	38	16	17	21	31	25	44	25	4	35	15	5	1	4	14	3	7	11	5	12	1	6	4	9	2	1	5	7	1
BLOC1S1	15	16	23	72	48	63	11	20	35	7	21	23	9	8	5	2	3	22	14	26	60	27	28	29	21	19	38	21	12	66	23	18	1	6	17	3	13	7	13	11	7	8	3	12	3	4	2	6	2
BLOC1S2	15	17	15	64	21	51	17	11	28	3	2	2	1	1	8	1	2	1	4	23	21	23	32	28	60	33	49	10	14	18	15	5	1	8	13	4	13	1	8	16	7	6	8	3	2	2	1	5	3
BLOC1S3	6	12	11	22	23	24	4	9	15	4	2	1	3	1	2	1	1	1	1	14	22	13	18	22	37	22	27	6	1	6	6	4	1	7	7	4	6	1	4	2	1	2	4	6	3	1	4	4	1
BLOC1S4	5	10	8	26	49	30	6	11	13	1	2	1	3	1	3	1	2	3	1	7	18	23	11	19	21	17	29	12	6	11	8	3	1	9	19	1	4	1	1	3	5	1	1	1	1	2	2	4	1
BLOC1S5	20	16	21	37	51	52	8	12	20	2	3	1	2	1	5	1	1	3	1	11	15	17	15	11	33	18	26	10	2	7	4	5	1	2	7	1	3	1	3	2	2	2	1	4	3	1	4	6	1
BLOC1S6	26	25	35	82	73	102	21	26	35	6	1	1	12	4	7	10	9	5	5	21	29	18	21	26	39	27	35	18	15	24	12	4	1	5	39	1	17	8	19	4	5	11	4	8	9	4	1	8	1
BLVRA	22	11	17	78	49	48	13	19	30	3	2	3	6	2	6	3	1	2	1	16	27	16	26	21	22	27	36	12	12	17	14	12	1	4	19	2	9	6	5	2	3	7	1	10	4	1	3	9	3
BLVRB	24	22	39	54	75	88	13	28	20	2	2	2	5	1	11	2	1	3	4	12	37	21	26	26	36	13	35	14	4	15	5	11	1	4	18	1	6	2	2	2	3	1	1	2	2	1	7	18	5
BLZF1	35	10	26	49	78	90	8	28	20	5	16	18	5	7	7	3	1	14	12	16	44	28	34	24	44	26	52	57	5	95	23	19	1	4	27	1	12	19	11	38	5	13	2	16	3	3	2	15	1
BMERB1	47	34	64	106	143	211	45	56	56	10	9	10	8	5	5	9	8	11	11	48	90	91	75	84	57	43	114	23	23	26	15	12	1	6	10	4	25	3	34	15	12	10	9	17	5	2	2	6	1
BMF	19	10	34	72	48	102	15	16	43	6	3	2	3	4	7	3	1	4	5	16	25	20	20	15	50	28	30	16	4	25	8	6	1	6	13	3	16	1	6	1	1	3	3	7	3	1	2	5	1
BMI1	8	13	25	77	40	56	10	8	35	6	7	13	7	1	6	7	2	16	8	18	23	15	22	23	28	18	23	29	10	64	15	20	1	8	17	1	17	15	16	35	7	18	3	20	6	2	1	11	5
BMP1	16	6	15	38	28	40	10	9	21	3	9	9	3	6	4	3	1	11	4	10	21	17	18	19	21	15	24	18	5	29	7	10	1	7	8	4	8	8	12	5	8	8	1	8	5	1	2	8	1
BMP10	7	10	12	23	37	35	12	15	13	1	2	1	2	1	1	2	1	1	2	7	15	12	12	13	29	20	23	7	5	10	1	2	1	1	5	1	3	3	7	1	1	1	2	2	2	6	4	12	3
BMP15	13	11	12	38	29	43	9	15	20	1	1	1	4	2	2	1	1	1	1	6	27	17	24	26	33	23	26	4	9	5	2	1	1	6	9	1	3	1	1	1	1	1	1	4	2	1	3	2	4
BMP2	10	13	12	44	34	60	12	21	20	2	6	9	2	1	3	1	1	3	6	6	25	20	24	20	29	20	29	13	5	6	9	3	1	4	11	1	5	7	6	4	4	4	6	1	1	2	7	9	2
BMP2K	18	14	29	46	48	53	13	16	37	3	3	1	10	1	7	2	4	2	1	14	13	21	14	24	22	21	28	9	8	11	5	7	1	3	8	1	6	4	1	4	1	3	2	2	7	3	3	7	1
BMP3	3	12	12	33	32	33	8	5	24	1	3	3	1	1	1	1	1	2	1	4	21	9	8	18	18	16	20	3	1	2	7	1	1	5	7	1	3	2	1	1	1	1	1	6	1	1	3	3	1
BMP4	29	15	46	38	63	57	10	26	24	1	3	5	2	2	5	2	2	10	6	13	28	37	49	47	37	25	46	7	7	18	9	12	1	4	16	3	13	12	3	6	5	5	4	13	2	2	6	7	2
BMP5	10	10	19	40	37	44	10	11	16	1	1	1	1	1	3	2	3	5	1	12	6	15	21	12	35	27	24	6	6	6	5	2	1	2	9	2	6	3	4	5	4	1	1	4	3	4	2	3	2
BMP6	9	17	10	39	37	40	6	15	21	1	1	1	4	1	5	2	1	1	1	6	15	8	9	18	26	16	34	7	2	5	6	1	1	3	12	1	5	1	5	1	1	1	4	3	1	2	1	1	2
BMP7	9	12	20	29	26	19	10	10	11	4	1	1	6	1	1	1	1	1	1	10	14	10	15	10	37	17	21	4	8	6	3	1	1	3	7	2	2	1	4	3	2	1	2	4	9	3	1	6	2
BMP8A	12	12	9	39	39	47	11	12	12	2	2	4	1	1	2	1	1	4	1	10	15	19	22	17	21	15	28	3	1	11	2	2	1	2	16	1	5	1	8	5	2	2	1	4	13	2	1	4	3
BMP8B	12	15	18	39	28	39	6	13	35	3	1	5	5	1	6	3	2	4	3	18	26	13	14	15	27	30	19	7	14	12	3	3	1	7	5	2	2	3	14	4	9	3	2	4	2	2	1	6	1
BMPER	1	8	14	40	35	42	14	12	23	1	1	2	3	1	3	1	2	1	1	10	16	20	14	18	39	12	30	4	9	9	4	3	1	4	7	2	4	4	5	4	2	1	2	1	1	1	7	5	2
BMPR1A	16	9	13	38	49	53	15	16	22	1	1	4	4	2	4	1	1	4	1	13	15	14	12	25	31	21	30	19	7	11	8	7	1	2	31	1	6	7	8	6	1	1	3	5	2	1	2	10	2
BMPR1B	19	12	22	49	37	45	7	14	24	1	2	4	1	1	5	8	2	2	1	7	13	17	12	16	24	20	24	5	5	9	7	6	1	2	10	1	7	5	8	2	7	5	3	1	1	1	1	4	1
BMPR2	21	13	26	63	73	84	10	28	29	3	9	18	12	13	3	2	1	37	18	23	42	34	35	38	34	29	47	29	12	57	10	16	1	17	14	2	26	11	15	14	11	14	4	20	8	2	8	7	1
BMS1	31	17	39	63	83	100	11	23	22	1	7	8	4	2	2	2	2	4	4	7	24	17	19	19	25	17	30	14	8	19	2	4	1	7	4	2	8	4	2	9	8	6	1	5	1	2	2	4	2
BMT2	15	15	18	56	57	47	10	18	28	2	4	5	5	1	3	3	2	9	2	11	21	21	28	25	45	21	33	13	5	18	14	10	1	10	9	4	12	4	3	5	1	4	1	6	2	2	2	6	2
BMX	9	9	12	32	22	44	7	9	20	1	2	2	3	1	1	2	2	2	2	7	14	16	18	16	21	18	29	4	7	7	7	3	1	2	36	1	2	4	3	2	3	3	1	6	1	1	2	7	2
BNC1	21	12	22	45	48	73	6	15	31	1	4	3	2	1	2	1	1	1	1	13	15	24	25	23	29	26	27	5	10	6	4	1	1	4	16	2	2	2	3	2	1	1	1	8	1	4	2	10	1
BNC2	17	9	25	40	44	40	7	7	18	1	1	1	4	1	4	1	1	4	1	14	11	14	12	24	26	23	26	5	6	11	5	4	1	4	7	1	13	2	3	4	3	1	1	5	3	2	2	4	1
BNIP1	17	21	35	57	67	77	16	17	32	2	1	1	4	1	5	1	1	5	1	9	23	19	23	22	29	20	37	14	6	14	14	3	1	1	14	1	6	2	3	3	2	3	3	3	3	2	1	6	4
BNIP2	16	16	22	53	37	64	8	19	40	2	7	3	10	2	7	9	2	6	5	20	27	25	18	23	32	22	38	13	16	26	14	15	1	2	5	2	10	4	7	19	6	10	4	13	3	1	5	7	3
BNIP3	14	13	11	58	31	40	15	7	28	1	1	2	7	1	4	1	2	1	2	11	19	13	19	25	22	18	25	10	4	10	4	6	1	18	6	1	6	3	2	1	2	3	1	3	1	2	3	3	3
BNIP3L	48	51	85	177	159	295	44	72	123	12	14	40	29	10	21	17	13	42	16	90	79	45	56	55	46	44	100	58	59	77	29	34	1	8	26	3	41	21	30	17	23	12	9	27	19	5	7	31	7
BNIP5	12	16	21	42	53	38	9	16	15	1	6	4	3	1	6	1	1	1	3	13	27	12	17	17	31	21	26	19	2	18	12	5	1	2	6	1	5	4	3	5	4	3	2	6	3	1	1	2	3
BNIPL	11	10	15	36	30	45	10	12	18	1	1	1	3	1	2	1	2	1	1	4	11	9	8	15	23	20	25	1	5	5	4	2	1	1	13	1	7	2	1	3	2	1	2	6	1	3	1	11	3
BOC	11	9	15	27	19	30	12	11	15	1	1	1	1	1	4	1	2	3	1	10	17	22	14	21	35	22	30	7	7	6	5	4	1	9	9	1	10	1	4	4	3	1	3	4	3	2	1	11	1
BOD1	19	17	20	45	43	49	19	13	27	5	3	6	8	1	3	2	1	10	4	20	20	16	23	17	35	23	20	11	6	29	6	12	1	3	9	1	10	12	10	4	7	4	3	7	3	3	3	4	3
BOD1L1	13	10	24	59	60	56	15	21	28	3	2	7	4	2	8	1	3	5	6	17	37	33	16	24	39	29	37	5	5	31	14	6	1	3	9	1	15	7	6	6	7	4	2	6	4	3	4	6	2
BOD1L2	10	8	9	29	32	23	5	11	12	1	1	1	2	2	2	1	1	1	1	3	14	14	13	13	21	22	17	4	1	2	4	5	1	2	6	1	1	2	3	1	1	1	2	2	3	1	2	7	1
BOK	60	41	92	167	226	162	25	72	68	1	19	32	5	10	3	1	3	23	16	15	39	32	33	40	29	13	44	18	7	45	21	21	1	5	12	1	10	10	6	11	1	10	1	10	1	1	3	8	1
BOLA1	22	15	26	41	45	42	6	11	21	1	5	9	7	2	4	1	2	7	2	22	15	11	10	23	36	23	19	12	13	17	8	3	1	3	17	2	3	4	6	7	2	1	2	3	2	3	2	12	1
BOLA2B	32	8	58	90	95	113	10	27	35	6	29	28	9	18	7	3	3	21	9	15	84	79	57	50	40	22	76	30	6	41	19	13	1	1	17	4	12	11	8	10	3	4	5	13	2	1	7	11	1
BOLA3	32	20	38	62	68	86	15	12	23	1	10	6	2	1	7	1	3	6	1	8	24	8	26	20	34	18	21	12	5	27	9	8	1	2	11	2	8	5	6	7	2	3	2	7	3	4	2	6	1
BOLL	24	24	18	103	63	70	16	14	42	2	1	3	1	1	3	2	1	3	1	14	22	25	19	21	32	25	48	7	8	8	6	4	1	3	6	1	5	1	3	1	1	1	2	4	1	2	5	11	3
BOP1	10	20	18	34	44	42	15	15	24	1	2	2	1	1	3	1	1	1	1	9	8	11	9	17	27	26	30	6	3	16	12	1	1	1	16	1	6	1	7	8	2	4	3	3	2	1	1	4	1
BORA	14	6	11	18	19	16	8	6	8	1	3	2	1	1	1	1	1	1	2	9	14	9	8	13	14	12	11	4	1	10	5	5	1	1	11	1	4	2	2	4	1	3	1	3	1	1	1	2	3
BORCS5	16	17	15	42	36	48	5	17	19	2	5	4	7	1	4	3	2	1	1	12	21	29	20	27	42	26	31	10	4	24	15	6	1	5	9	1	4	10	6	8	4	3	3	5	3	1	3	6	1
BORCS6	11	4	16	42	33	38	13	15	19	3	3	3	2	1	4	1	1	2	1	9	12	15	21	13	20	17	22	3	7	15	6	3	1	3	5	1	15	1	1	5	2	1	2	4	4	1	3	8	1
BORCS7	19	11	28	50	40	57	9	18	14	2	1	3	6	1	3	1	1	6	2	11	30	21	27	33	17	13	36	11	6	18	4	4	1	2	11	1	8	2	3	4	3	1	1	4	3	1	4	6	1
BORCS8	18	10	14	34	41	44	10	15	19	1	1	2	4	1	3	2	4	1	1	7	22	16	12	23	25	20	27	5	3	16	8	1	1	5	8	1	4	3	2	1	2	3	2	6	1	1	1	5	5
BPGM	13	35	15	72	42	51	11	16	42	4	5	5	7	2	11	6	3	4	11	22	24	25	22	25	34	29	34	12	13	18	4	6	1	9	15	2	11	3	21	7	11	6	3	4	6	3	5	4	1
BPHL	12	15	13	39	42	40	9	16	19	4	2	6	1	3	7	1	2	2	3	11	23	11	12	20	32	24	17	6	8	8	4	5	1	4	8	1	2	1	5	7	1	5	2	6	3	2	1	8	3
BPI	8	9	18	43	34	26	6	12	22	1	1	2	1	1	1	2	1	1	1	10	12	11	8	22	25	14	21	4	6	5	4	4	1	2	8	2	2	3	4	1	3	2	1	3	1	3	6	11	1
BPIFA1	17	15	24	49	39	44	7	13	19	1	2	2	3	1	4	2	1	2	1	7	15	14	18	24	35	29	18	8	4	12	5	4	1	4	2	2	8	5	3	1	1	2	1	2	2	2	1	8	3
BPIFA2	14	5	17	28	39	37	7	20	20	1	2	1	2	2	4	1	1	1	1	5	14	12	8	9	20	12	23	8	2	4	4	4	1	3	5	1	4	1	8	2	1	2	2	3	1	1	1	3	3
BPIFA3	9	12	15	42	45	47	15	14	34	2	1	4	1	2	5	2	1	1	1	7	17	20	19	19	36	22	25	10	9	10	6	3	1	3	7	4	6	1	6	4	2	1	2	4	2	1	3	3	2
BPIFB1	20	8	22	43	67	68	9	26	21	1	1	5	2	1	2	1	1	3	1	3	18	20	11	16	20	13	25	6	4	18	13	9	1	1	9	1	7	13	1	3	1	1	1	15	2	9	2	4	1
BPIFB2	18	9	30	59	51	48	15	17	28	1	1	1	3	2	1	1	1	4	1	11	18	21	18	18	29	29	25	6	8	6	3	4	1	2	6	2	3	3	5	2	1	1	4	3	5	1	1	7	2
BPIFB3	12	12	25	43	43	44	10	9	16	1	2	3	1	2	4	1	1	1	1	6	13	12	23	14	27	16	23	12	4	9	8	1	1	3	7	1	5	1	2	7	3	2	4	1	2	4	1	6	1
BPIFB4	11	9	14	41	32	25	5	10	20	2	1	1	4	1	3	1	1	1	1	4	18	10	11	16	26	17	25	6	3	6	4	4	1	2	4	1	4	1	5	3	1	1	1	2	1	1	3	7	1
BPIFB6	14	9	20	37	42	39	11	15	24	2	1	1	1	3	3	1	1	3	1	9	14	15	13	18	28	26	17	3	3	10	6	1	1	4	9	1	5	2	3	1	1	1	2	6	2	3	1	4	2
BPIFC	8	13	16	46	32	34	9	15	21	4	2	2	1	1	6	2	1	1	1	10	18	12	14	17	20	22	19	6	4	10	5	5	1	3	6	4	4	2	1	3	5	1	1	4	1	8	1	1	1
BPNT1	20	13	35	42	42	80	17	21	25	2	10	13	3	3	3	1	1	7	11	8	32	27	22	18	25	9	24	22	1	72	22	12	1	4	8	3	4	14	5	8	1	3	1	7	2	1	1	6	2
BPNT2	20	17	28	69	44	88	20	15	28	7	6	3	3	3	7	1	3	6	9	22	35	38	18	28	34	22	38	20	9	26	9	20	1	5	16	2	13	6	10	14	4	4	4	10	5	2	9	14	3
BPTF	22	21	41	68	80	79	16	27	37	15	23	32	13	5	11	7	2	26	10	15	35	45	40	36	49	39	50	28	19	55	10	12	1	5	21	2	12	13	10	13	2	1	3	24	6	3	3	6	1
BPY2	7	11	13	29	21	37	7	8	15	2	2	3	2	1	1	1	1	2	1	11	19	25	19	16	22	26	32	7	3	8	4	3	1	1	9	1	3	1	6	5	1	1	2	4	2	5	3	5	2
BRAF	28	25	28	65	65	103	15	13	30	6	11	5	9	2	18	8	3	5	9	20	50	25	26	23	48	32	33	22	7	39	13	15	1	3	21	4	11	14	12	21	5	14	5	15	3	2	1	7	2
BRAP	18	7	18	40	39	62	11	13	32	1	1	4	1	1	7	3	3	2	3	15	27	20	22	24	33	23	37	18	7	27	9	9	1	3	5	2	5	7	3	14	1	8	3	8	3	2	2	8	1
BRAT1	18	17	19	38	42	51	15	15	27	1	4	7	4	1	8	2	1	5	3	9	24	27	26	22	31	22	36	19	5	17	14	10	1	5	15	4	13	3	5	10	4	3	2	8	5	1	3	14	2
BRCA1	9	14	18	37	34	39	13	18	28	1	3	3	5	3	4	1	1	4	3	17	20	25	18	15	22	31	37	10	6	9	2	2	1	3	15	1	1	3	6	2	3	2	4	1	4	1	1	6	1
BRCA2	22	13	22	38	56	48	7	21	25	1	5	10	3	4	7	2	1	1	1	15	19	20	19	16	39	25	38	6	5	18	1	9	1	2	14	1	5	3	5	3	3	9	1	6	2	2	2	5	1
BRCC3	9	9	17	34	39	45	11	17	18	1	2	4	3	2	3	2	1	4	2	4	18	13	16	20	28	17	19	8	7	20	7	2	1	2	10	2	6	5	1	4	3	2	1	7	1	2	2	4	2
BRD1	14	10	12	32	42	58	9	16	22	2	7	3	4	1	5	1	1	1	2	9	31	27	29	26	30	22	33	10	6	12	6	6	1	4	13	2	8	4	3	12	1	3	2	5	3	1	5	10	5
BRD2	33	23	46	69	123	136	21	33	52	11	27	25	17	12	8	14	13	35	17	23	72	41	45	32	50	33	68	43	12	96	25	20	1	17	19	1	25	33	26	33	10	14	7	11	15	5	2	11	6
BRD3	21	15	23	52	60	49	12	15	29	11	20	20	11	4	2	4	6	22	16	16	34	32	18	33	25	25	41	27	18	68	7	15	1	9	17	4	17	18	12	14	16	9	4	9	3	3	4	6	2
BRD3OS	17	8	16	31	25	34	11	11	19	3	2	1	1	1	5	2	1	1	5	12	16	7	11	8	17	10	22	6	5	7	6	4	1	1	8	1	4	1	5	3	2	1	3	3	4	2	1	3	2
BRD4	30	15	31	75	95	145	25	24	46	14	26	60	40	14	21	14	14	39	32	21	40	41	45	34	60	27	46	50	16	102	31	22	1	16	29	3	22	22	26	51	23	33	9	36	13	3	6	14	9
BRD7	25	12	37	49	88	80	26	29	24	3	4	4	5	1	6	1	2	4	7	18	24	22	22	21	29	24	36	20	2	34	14	9	1	4	13	1	9	9	8	6	7	7	1	8	5	3	1	6	3
BRD8	10	15	14	44	54	69	5	19	25	3	4	8	3	1	5	3	1	7	3	11	23	24	28	36	31	23	44	36	6	59	12	9	1	5	13	1	14	15	8	3	1	5	3	9	5	2	3	8	8
BRD9	24	13	28	37	62	56	6	17	26	3	1	5	3	3	2	1	2	2	2	16	35	14	31	18	30	22	26	17	6	28	9	13	1	3	10	1	4	9	10	25	5	11	1	7	1	1	4	6	4
BRDT	7	8	13	32	33	26	12	8	20	1	1	1	3	1	4	1	3	2	1	6	21	16	23	21	29	15	24	3	4	9	3	1	1	2	7	3	4	3	6	3	2	5	5	5	2	3	3	3	2
BRF1	7	3	11	30	23	26	9	8	13	2	5	3	3	1	5	2	1	1	1	3	10	14	11	12	21	15	12	8	4	7	6	4	1	1	2	1	8	1	3	3	1	1	1	5	2	2	2	5	3
BRF2	16	10	20	26	40	45	12	13	18	2	2	3	3	1	5	2	2	4	1	12	22	24	29	18	28	22	27	14	15	16	13	1	1	3	7	1	9	3	4	1	1	1	1	4	6	1	3	8	1
BRI3	37	20	63	100	161	267	13	57	61	7	25	37	18	17	9	8	5	53	26	33	172	56	60	77	29	16	100	76	14	99	38	35	1	9	20	1	30	25	14	38	13	17	8	31	17	7	17	24	1
BRI3BP	32	10	23	53	67	66	8	40	23	5	15	8	6	5	4	1	1	7	4	9	40	43	39	31	33	21	51	28	10	54	14	6	1	1	16	1	9	10	2	12	2	4	2	9	3	3	1	4	1
BRICD5	15	18	19	57	46	50	12	24	11	2	4	1	2	3	4	1	2	6	2	14	30	13	14	15	24	15	28	8	4	11	8	3	1	2	7	3	4	2	4	3	3	2	4	4	4	2	3	3	1
BRINP1	14	4	17	28	36	45	8	9	10	1	1	3	3	1	2	4	1	2	1	7	10	11	11	14	27	25	13	8	6	9	5	3	1	1	13	1	8	1	2	3	1	1	1	3	3	6	2	6	1
BRINP2	11	9	17	36	44	41	19	12	20	3	1	1	1	1	2	1	3	2	1	8	11	17	14	13	26	18	25	5	8	10	4	5	1	3	9	1	7	5	5	1	1	1	4	1	1	3	1	8	1
BRINP3	75	41	92	154	145	159	26	97	99	2	3	1	4	1	3	1	1	1	1	13	20	11	25	23	26	27	25	24	3	10	10	1	1	6	7	2	9	5	4	1	2	1	2	10	4	1	1	3	1
BRIP1	9	11	15	47	38	50	8	18	22	2	2	1	2	3	3	1	1	1	1	13	13	14	16	19	27	29	23	6	6	10	3	5	1	3	6	4	5	3	5	5	1	1	5	10	4	1	3	10	1
BRIX1	24	11	34	43	50	58	16	16	21	3	5	8	6	5	7	4	1	7	1	10	18	29	23	22	37	25	29	19	2	25	12	9	1	3	16	1	7	11	17	13	7	5	1	11	3	1	6	13	1
BRK1	49	34	60	108	126	180	26	48	66	11	21	29	15	12	13	3	3	24	10	26	48	49	33	19	34	17	51	51	17	86	22	29	1	10	22	1	18	21	14	33	11	12	5	26	7	5	1	11	4
BRME1	24	9	15	40	49	46	11	11	17	3	3	1	1	1	3	1	1	2	3	10	20	16	24	34	35	35	20	11	4	11	4	3	1	6	9	1	4	1	5	4	4	1	4	2	3	1	2	5	1
BRMS1	26	12	42	56	76	81	11	15	35	6	9	6	5	2	3	1	2	7	4	11	43	27	23	33	40	27	41	12	7	21	11	4	1	5	12	2	12	6	4	6	8	2	4	6	5	1	3	9	2
BRMS1L	17	13	16	42	45	57	11	14	23	6	1	6	8	4	8	1	2	5	1	8	17	11	16	12	30	28	24	7	4	10	4	2	1	5	11	2	9	2	2	6	3	1	1	5	2	2	2	5	1
BROX	29	16	61	53	116	146	14	35	33	9	29	28	7	11	5	4	2	31	15	21	63	32	40	27	37	31	53	65	13	108	56	24	1	8	26	2	16	27	14	26	7	10	3	24	11	1	3	9	3
BRPF1	14	14	19	24	37	38	14	16	18	1	3	3	2	4	6	1	2	1	3	8	21	22	20	14	17	29	30	8	6	20	6	8	1	2	12	1	12	5	9	6	1	3	3	7	3	1	3	4	1
BRPF3	21	13	26	49	69	63	16	21	27	5	5	8	8	2	10	7	4	12	3	12	23	21	26	20	43	29	27	29	15	40	11	3	1	5	18	2	13	13	10	11	6	15	7	9	3	2	7	2	1
BRS3	11	7	16	35	24	31	5	15	15	3	1	1	2	1	1	3	1	1	2	4	10	12	18	11	26	25	24	8	3	10	5	4	1	1	5	3	6	1	3	3	1	1	2	3	1	5	1	7	2
BRSK1	12	5	14	38	24	34	9	14	20	1	1	1	6	2	4	1	2	2	1	7	14	15	13	14	27	26	48	4	2	7	3	4	1	1	9	2	10	1	5	1	2	1	1	5	1	2	1	5	4
BRSK2	14	10	16	36	46	48	9	17	32	3	4	1	6	4	9	1	2	4	3	12	14	16	16	21	32	24	29	8	8	12	5	7	1	2	7	3	5	2	4	7	4	2	2	2	3	4	1	10	1
BRWD1	28	15	25	37	77	85	16	24	23	2	22	28	2	5	4	2	1	37	14	16	34	36	27	23	44	27	39	21	8	56	12	10	1	10	19	1	12	15	9	16	3	3	3	16	5	2	3	11	6
BRWD3	33	13	23	74	60	78	17	19	29	4	9	13	6	2	12	3	6	20	13	19	24	26	23	27	38	22	46	15	8	28	7	6	1	6	11	5	19	7	8	8	2	5	6	10	4	1	3	6	1
BSCL2	11	9	10	33	49	41	7	10	9	1	5	6	4	4	7	1	3	5	3	9	16	19	8	16	13	13	19	12	9	15	5	4	1	4	3	1	8	6	2	3	1	2	1	1	4	4	5	6	1
BSDC1	15	12	15	54	55	57	8	23	32	5	3	4	8	2	2	2	2	6	10	15	31	33	23	21	28	20	35	20	6	43	11	5	1	8	19	1	12	9	6	14	6	5	2	8	3	2	2	3	3
BSG	41	30	88	182	164	215	20	57	81	18	21	27	17	11	13	12	10	27	13	51	222	116	78	101	41	21	138	75	33	209	42	65	1	21	64	1	57	64	30	52	16	19	4	29	16	5	6	8	5
BSN	15	10	23	33	28	44	16	16	18	2	4	4	7	1	7	1	1	2	1	12	12	15	15	17	30	22	22	14	8	8	4	2	1	5	13	4	7	3	6	3	1	1	6	6	4	1	6	9	1
BSND	16	6	13	23	23	42	8	11	11	3	1	1	2	1	2	1	1	1	1	14	10	11	16	21	27	17	23	8	2	6	5	1	1	2	15	4	3	6	3	5	1	3	1	2	1	1	7	5	1
BSPH1	17	11	16	49	31	41	13	17	16	2	1	1	2	1	6	1	1	2	1	7	19	14	13	26	37	29	36	8	5	15	9	5	1	1	10	4	1	1	3	5	1	2	4	4	9	3	2	4	1
BSPRY	8	8	14	17	24	44	4	18	17	2	10	5	1	3	2	1	1	3	1	5	26	19	17	10	14	18	25	13	5	12	10	8	1	6	11	1	5	2	5	8	1	7	1	4	1	2	3	12	2
BST1	15	10	12	37	31	42	10	11	30	4	3	1	6	1	6	2	1	1	2	8	12	14	14	20	35	25	23	7	3	7	3	6	1	7	8	1	3	2	5	4	4	3	1	1	3	1	4	5	1
BST2	79	40	75	101	173	179	20	88	64	3	12	14	9	4	4	2	2	9	15	18	28	28	32	32	39	31	32	17	9	14	14	44	1	10	11	1	12	4	11	10	12	12	3	43	7	5	1	3	3
BSX	13	7	9	32	26	23	11	5	14	1	1	1	2	1	2	3	3	1	1	5	9	10	6	23	16	19	21	3	2	6	5	4	1	1	5	1	4	2	1	2	1	2	4	7	2	2	3	10	1
BTAF1	14	13	32	40	46	64	14	20	25	4	9	10	7	8	8	4	5	10	7	19	63	38	36	28	39	36	50	14	14	41	8	10	1	8	58	2	13	14	10	13	10	6	6	12	7	3	2	9	2
BTBD1	25	22	29	81	58	89	14	28	23	6	8	15	13	4	4	7	5	15	6	15	59	32	45	42	28	26	65	28	13	57	24	15	1	13	25	3	11	19	20	26	8	11	8	7	6	4	6	6	3
BTBD10	25	13	26	54	69	86	13	27	33	7	8	7	6	2	5	2	3	8	1	12	36	29	38	30	44	23	51	11	1	24	10	10	1	6	9	1	11	3	11	13	5	6	1	5	3	4	3	9	1
BTBD11	14	8	16	47	32	35	6	9	22	1	1	2	3	1	3	1	1	2	1	10	17	19	16	19	31	25	30	4	6	11	6	2	1	5	8	1	3	2	2	1	6	2	4	3	2	4	1	7	1
BTBD16	9	10	24	41	35	39	13	11	16	1	3	2	5	1	5	1	1	5	1	13	14	14	13	17	29	15	35	10	1	11	8	2	1	5	12	1	4	3	1	2	1	3	3	12	3	2	1	5	1
BTBD17	7	6	11	31	16	37	9	7	18	2	1	3	4	1	4	1	1	3	1	6	8	14	12	14	24	20	26	4	3	8	8	1	1	3	8	2	4	1	2	1	1	2	1	5	1	2	3	7	1
BTBD18	11	16	9	41	34	48	14	15	23	1	2	2	2	1	10	2	1	1	1	7	16	17	16	20	26	19	22	9	7	7	5	2	1	5	7	1	2	1	6	2	2	1	2	1	2	3	1	4	3
BTBD19	8	12	13	36	33	41	10	15	18	1	3	10	8	4	3	3	1	14	5	14	20	18	27	32	28	25	28	5	3	8	8	4	1	6	13	1	10	1	12	1	10	3	2	10	4	3	5	6	1
BTBD2	18	15	26	69	68	71	10	31	30	8	13	15	9	4	7	4	3	18	7	15	60	44	33	35	39	20	52	29	9	61	15	21	1	6	29	7	17	13	5	9	3	4	4	15	4	1	8	10	1
BTBD3	12	14	17	39	33	43	17	10	21	8	5	9	3	3	2	1	2	5	4	17	34	23	26	23	28	32	38	11	12	11	10	10	1	5	15	1	6	10	5	4	2	4	1	7	4	3	3	4	3
BTBD6	518	230	454	589	816	1182	177	454	380	11	23	47	27	10	22	11	11	30	15	96	315	303	256	247	190	130	430	139	42	184	67	59	1	32	42	3	65	50	50	59	22	28	20	61	17	11	12	14	9
BTBD7	8	10	20	39	45	40	7	19	28	3	6	6	10	2	9	2	1	6	3	9	26	19	18	25	35	29	33	10	11	18	7	9	1	5	9	1	9	8	2	7	3	1	1	4	4	3	5	9	4
BTBD8	8	11	17	32	35	53	9	11	26	2	1	3	1	2	6	1	1	2	4	10	22	10	18	23	19	13	23	9	2	13	6	3	1	2	7	2	9	3	7	2	1	1	1	6	1	1	1	8	5
BTBD9	24	8	30	52	66	53	3	18	34	1	5	9	4	3	5	4	2	8	2	12	29	24	25	27	27	19	27	15	9	40	10	12	1	2	10	1	10	11	10	12	7	8	1	5	1	3	1	3	1
BTC	73	26	93	139	176	222	53	75	64	4	2	2	4	1	6	1	4	3	2	24	47	43	38	44	31	21	62	12	4	11	7	6	1	1	14	3	4	3	6	6	6	1	1	5	1	4	5	5	1
BTD	8	12	13	33	23	32	8	12	15	1	1	1	5	2	2	1	2	4	1	11	15	14	16	20	27	20	26	6	5	13	7	3	1	5	9	2	4	3	4	3	2	1	1	4	5	2	4	10	3
BTF3	100	49	175	216	327	469	32	107	79	18	63	73	19	21	19	21	18	112	55	52	152	87	60	55	59	45	107	128	29	315	109	86	1	18	55	4	54	75	37	62	19	18	13	84	23	10	5	18	4
BTF3L4	13	16	28	57	57	58	17	13	25	5	4	10	4	1	3	2	1	10	6	13	25	15	17	21	35	36	29	17	4	20	10	4	1	2	9	1	11	5	6	4	5	5	2	5	4	1	2	4	1
BTG1	26	52	44	248	101	165	46	27	142	28	21	68	78	16	19	27	24	92	30	116	144	111	90	137	45	37	125	50	33	81	32	26	1	23	22	1	63	25	70	74	49	56	11	21	14	7	14	9	14
BTG2	25	8	32	26	81	73	15	14	21	9	28	31	26	6	27	17	15	33	12	13	106	37	37	30	49	26	103	81	20	120	53	11	1	13	40	1	34	17	13	18	10	5	7	9	9	5	4	4	2
BTG3	25	12	39	84	79	107	17	23	40	5	6	15	9	6	6	4	5	13	9	24	19	16	20	15	26	25	33	8	10	17	8	5	1	7	9	2	15	2	13	4	4	8	6	9	5	2	2	7	2
BTG4	7	6	15	40	31	44	9	12	19	1	2	3	1	1	6	1	1	1	1	11	21	14	12	15	20	23	21	8	1	8	3	4	1	5	6	1	5	1	6	3	3	1	2	2	3	2	1	8	1
BTK	24	18	23	44	44	66	16	20	21	3	1	2	7	1	6	1	4	3	1	17	22	23	16	25	38	36	23	4	2	16	5	2	1	2	10	1	7	1	4	1	1	3	2	3	2	1	1	3	1
BTLA	20	8	15	36	29	40	9	14	18	1	1	4	1	1	2	1	3	1	1	10	14	17	14	18	25	22	25	4	4	6	3	1	1	4	10	2	7	2	1	4	1	1	1	6	1	4	2	6	2
BTN1A1	11	16	13	45	38	43	11	10	13	1	1	3	2	1	1	1	1	1	1	14	24	18	15	23	32	16	28	3	5	13	1	3	1	3	8	1	9	1	5	5	3	1	2	3	1	2	1	5	4
BTN2A1	12	14	20	44	54	64	7	11	25	1	11	12	6	6	2	1	1	10	10	13	36	27	26	27	42	32	36	16	8	30	8	9	1	3	16	1	9	5	5	9	6	6	3	5	3	3	2	3	3
BTN2A2	16	11	13	41	26	47	13	11	17	1	1	1	1	1	1	1	2	3	3	6	11	9	14	13	29	20	25	2	7	6	2	5	1	2	6	1	2	1	2	4	1	1	3	3	1	4	2	2	4
BTN3A1	29	20	41	77	79	92	15	21	40	6	3	3	6	1	7	4	3	4	5	14	37	19	23	30	38	29	55	19	6	32	4	11	1	7	11	1	6	5	5	6	7	6	2	11	7	3	5	5	1
BTN3A2	8	9	13	38	40	38	8	10	21	4	1	4	4	2	1	2	2	2	1	8	20	13	20	16	27	18	32	6	4	13	6	2	1	1	10	2	7	4	1	2	1	2	2	2	3	4	2	4	2
BTN3A3	18	17	35	48	47	60	15	15	31	3	2	5	4	2	3	2	1	6	2	13	23	19	21	24	39	29	30	9	7	12	5	7	1	7	12	1	5	5	5	6	1	2	9	3	2	4	2	6	1
BTNL2	14	12	16	28	27	35	17	7	21	1	4	1	6	1	1	1	1	2	1	8	11	15	18	14	22	22	24	6	7	5	2	2	1	2	7	3	6	3	2	3	1	2	1	5	3	1	3	5	4
BTNL3	73	45	89	158	182	248	43	77	72	5	3	7	6	1	2	1	2	10	5	23	60	39	47	53	48	38	78	41	10	80	24	9	1	8	10	5	7	8	8	6	6	3	6	10	6	1	2	7	10
BTNL8	12	9	18	41	37	27	14	18	21	1	3	3	2	1	5	1	1	2	1	8	42	24	17	26	35	29	33	31	4	32	10	5	1	2	20	1	5	3	6	6	1	1	1	10	2	1	3	1	2
BTNL9	15	13	14	41	37	50	7	15	29	2	3	1	2	2	4	1	1	2	1	7	21	9	18	15	33	28	24	9	3	12	3	1	1	3	9	3	7	2	2	6	2	1	1	8	2	3	6	5	3
BTRC	10	12	22	37	47	47	12	16	20	1	5	6	4	1	3	2	1	4	2	23	29	22	26	26	25	28	34	15	4	15	6	4	1	6	9	1	11	3	7	5	4	3	6	9	7	3	1	5	4
BUB1	15	9	20	41	41	53	4	8	27	1	2	2	1	1	6	3	1	1	1	19	9	17	22	24	31	30	24	6	5	19	7	1	1	4	9	1	5	1	4	1	1	3	3	8	4	2	2	5	1
BUB1B	10	8	16	41	36	50	8	15	26	1	3	1	1	1	3	1	1	3	1	13	22	12	18	27	30	20	30	8	8	11	3	7	1	4	7	4	5	3	1	2	2	2	1	4	1	5	3	2	1
BUB3	38	24	65	86	129	127	18	43	36	9	12	15	9	6	4	6	3	19	8	18	75	47	60	46	42	22	66	24	11	46	17	20	1	5	14	1	16	17	13	19	2	11	1	19	5	2	1	5	1
BUD13	21	17	30	39	52	83	11	20	18	3	3	10	3	1	5	2	4	6	3	5	28	15	18	25	36	19	34	9	10	14	3	6	1	6	10	3	10	6	9	6	5	1	3	4	2	1	1	9	3
BUD23	19	7	20	40	46	51	8	22	19	4	4	10	5	1	3	1	1	3	6	17	22	33	22	22	24	25	33	20	8	38	11	19	1	2	16	1	8	11	5	5	6	4	3	7	4	3	6	10	1
BUD31	15	13	20	57	67	76	8	18	31	6	11	14	7	4	5	1	2	17	7	22	25	21	31	24	39	26	30	11	10	33	10	15	1	3	14	2	17	6	10	13	2	6	5	7	6	4	3	6	4
BVES	11	5	13	44	33	25	16	7	21	1	2	1	3	2	3	2	1	4	1	9	12	17	18	14	41	19	21	38	7	10	4	7	1	8	4	1	9	1	4	3	3	3	3	3	1	1	1	8	1
BYSL	11	6	25	63	61	63	11	16	21	3	4	2	4	2	3	2	2	6	1	8	17	15	20	11	32	18	27	11	6	18	10	3	1	1	18	1	4	4	6	4	2	3	2	6	2	3	1	4	1
BZW1	40	28	49	69	127	189	20	36	57	11	27	54	11	22	4	6	5	53	22	15	55	40	38	34	26	20	41	38	9	66	17	27	1	5	26	1	11	15	21	27	9	18	2	10	6	5	13	23	7
BZW2	28	14	61	67	73	86	15	13	20	6	15	22	10	6	7	3	1	11	5	14	41	31	31	22	21	29	38	21	10	27	9	12	1	3	19	2	13	2	12	17	6	3	3	15	4	1	6	12	1
C10orf105	20	10	20	37	46	51	8	18	28	3	2	2	3	1	2	1	1	2	1	7	23	18	12	16	33	23	33	9	6	9	5	2	1	2	5	1	4	1	6	8	5	1	2	3	2	1	2	3	2
C10orf120	13	15	11	33	43	40	8	11	18	1	1	1	1	2	7	1	1	1	1	12	15	12	13	15	21	20	32	3	7	9	7	3	1	1	20	3	8	3	3	1	5	4	2	4	3	6	3	6	3
C10orf126	15	14	17	38	49	39	9	13	34	1	4	2	2	1	3	2	1	1	1	5	17	11	17	20	22	15	28	5	5	6	6	5	1	5	5	3	1	2	4	3	2	3	4	2	2	2	3	3	3
C10orf143	12	10	12	42	39	34	10	9	21	2	1	1	3	1	4	1	1	1	1	4	14	15	7	26	23	13	18	2	4	4	4	3	1	6	9	2	8	2	1	2	1	1	4	6	4	3	1	4	1
C10orf53	13	12	12	37	26	42	9	8	24	2	1	1	1	2	4	2	1	2	1	8	15	10	13	23	29	19	25	3	4	7	4	1	1	2	6	1	4	2	6	3	2	1	2	7	2	3	1	5	1
C10orf62	11	15	15	47	41	62	11	11	23	1	2	2	4	1	9	3	1	1	1	4	17	12	21	24	30	18	38	7	4	10	4	3	1	1	9	3	7	2	2	6	3	3	3	3	5	2	1	10	1
C10orf67	7	8	9	38	25	45	8	14	24	2	1	3	7	1	4	1	1	2	1	9	13	17	14	20	48	31	40	4	4	9	8	2	1	7	11	3	8	2	3	3	2	2	2	3	3	2	3	8	1
C10orf71	7	8	15	24	19	30	4	6	17	3	1	1	2	1	5	1	1	2	1	6	11	6	9	12	22	17	23	6	5	10	2	7	1	3	7	1	3	1	2	2	1	1	2	6	2	4	1	8	2
C10orf82	11	15	10	34	41	36	14	9	27	1	1	1	2	1	10	1	3	1	2	6	24	13	17	19	23	24	33	5	4	10	5	7	1	1	9	1	8	1	5	2	4	3	2	8	3	3	1	5	1
C10orf88	30	20	27	80	74	84	13	38	34	1	3	4	2	2	4	3	2	3	5	12	30	21	30	26	32	28	42	10	8	16	10	8	1	5	11	1	4	7	5	7	2	3	1	7	2	3	1	4	1
C10orf90	14	15	16	39	53	54	9	18	24	1	3	1	4	1	3	1	1	1	3	9	19	10	14	20	26	18	28	4	2	7	5	2	1	2	7	2	4	6	4	1	1	3	1	4	2	2	2	9	2
C10orf95	13	10	19	26	37	54	16	7	14	1	2	4	2	2	4	2	1	3	1	9	27	17	17	27	30	16	30	14	3	15	16	7	1	2	19	1	8	1	5	7	1	5	5	4	3	6	4	9	3
C10orf99	16	5	20	29	28	32	5	8	17	4	1	3	3	1	5	1	1	1	1	4	12	20	21	22	31	24	24	4	5	3	1	3	1	1	28	1	1	1	2	1	4	1	1	4	2	6	3	7	2
C11orf1	14	15	33	34	62	102	8	29	23	1	3	3	3	1	10	1	1	2	3	7	33	16	21	13	39	17	38	8	3	11	7	6	1	3	7	3	5	3	6	2	2	1	1	8	2	2	1	4	1
C11orf16	7	7	15	43	33	51	9	7	12	2	1	1	4	1	3	2	1	4	1	7	16	18	28	33	38	26	41	9	6	8	4	6	1	8	7	3	5	1	4	4	1	1	2	7	1	3	2	7	1
C11orf21	15	9	18	36	57	58	14	14	25	1	2	1	4	1	4	2	1	1	1	11	21	14	26	25	30	28	45	9	7	7	3	4	1	1	6	1	4	1	2	1	2	1	1	4	5	4	2	8	1
C11orf24	15	24	29	58	42	60	7	15	31	2	6	4	5	3	9	4	2	2	3	11	37	17	16	16	27	21	41	9	6	11	2	1	1	6	7	1	10	7	7	5	8	2	5	3	6	3	4	2	1
C11orf42	10	11	8	34	37	28	23	15	34	1	1	1	2	1	1	1	1	1	1	2	10	13	18	20	35	17	27	5	4	9	5	1	1	2	7	1	5	4	1	2	4	1	2	1	1	1	1	8	2
C11orf45	21	4	15	36	47	42	10	13	20	2	1	1	3	1	8	1	1	1	2	7	8	12	17	21	35	16	26	5	2	7	1	3	1	1	9	2	8	1	4	2	2	1	1	3	1	2	4	8	2
C11orf49	10	9	18	27	40	42	7	20	14	1	4	4	1	2	2	1	3	2	3	9	19	17	11	11	15	9	23	6	3	23	6	4	1	4	9	1	3	2	2	3	1	3	1	4	2	4	1	5	1
C11orf52	12	10	10	21	40	35	7	7	22	1	2	3	1	1	5	1	1	1	1	8	16	11	12	19	23	10	23	8	5	8	6	1	1	2	5	2	6	3	3	2	1	2	2	4	3	1	1	5	1
C11orf53	12	11	18	40	36	43	2	11	15	2	1	2	3	1	4	1	1	1	1	8	18	15	20	22	39	24	26	4	1	9	3	4	1	4	9	3	5	1	5	2	4	1	1	7	3	3	5	4	1
C11orf54	13	12	18	37	43	43	12	11	20	2	3	3	4	1	4	2	2	5	3	11	22	24	23	15	29	24	34	7	7	15	4	7	1	2	7	3	6	1	2	4	4	1	2	4	2	1	2	8	1
C11orf58	21	36	80	160	128	139	28	42	69	28	37	39	41	18	20	9	8	56	25	60	109	58	56	43	54	47	119	47	29	117	26	38	1	18	26	5	55	35	47	28	23	16	15	34	21	3	6	11	5
C11orf65	11	5	20	45	52	45	7	22	16	1	3	1	3	3	9	1	1	1	2	9	15	15	19	20	32	19	30	9	9	11	6	5	1	2	7	4	5	2	2	3	3	1	4	10	2	2	1	4	3
C11orf68	7	12	13	49	41	45	11	10	19	2	3	1	7	2	3	1	2	5	1	14	19	13	15	26	30	13	20	10	15	9	4	7	1	3	4	3	8	2	6	1	3	1	3	8	4	2	1	3	1
C11orf71	11	9	27	36	38	44	9	10	21	1	1	6	1	2	5	1	1	2	1	19	16	24	16	18	23	27	29	5	4	7	3	8	1	1	6	1	9	2	5	3	3	4	3	2	3	2	1	7	1
C11orf80	18	10	32	43	103	99	13	20	26	1	9	16	9	1	3	1	2	13	3	19	52	37	35	28	37	31	65	14	9	45	10	15	1	4	20	1	12	17	6	10	1	10	5	10	7	2	5	7	2
C11orf86	12	11	22	44	44	43	9	10	20	1	2	4	3	3	2	1	1	1	2	13	26	21	8	13	20	18	27	4	3	8	4	3	1	1	8	1	3	2	4	5	2	1	1	2	3	1	2	5	1
C11orf87	14	12	13	41	46	60	17	16	22	1	1	1	3	1	3	1	1	1	1	15	16	17	14	28	33	30	30	6	6	6	3	4	1	1	8	1	6	2	1	1	4	3	2	2	4	2	1	5	1
C11orf91	16	13	20	49	53	57	12	17	22	1	1	1	1	1	7	1	1	3	1	9	26	9	17	13	27	26	29	6	1	11	5	6	1	2	9	1	8	5	2	6	3	6	4	6	2	4	2	7	5
C11orf94	9	13	13	45	44	48	14	13	22	1	1	1	1	1	1	1	1	1	1	6	17	7	14	15	30	21	23	7	2	7	3	1	1	2	8	1	4	1	8	1	3	1	3	4	2	1	4	2	1
C11orf96	10	18	12	42	31	38	8	6	24	5	1	6	8	2	7	4	2	6	1	47	23	13	18	31	20	18	31	7	23	8	5	4	1	21	6	1	20	1	41	7	32	2	4	6	10	2	6	8	2
C11orf97	12	10	17	32	26	30	7	14	24	2	3	1	4	1	3	1	1	1	1	6	20	11	14	14	17	14	22	8	1	6	7	1	1	1	6	1	4	1	5	2	1	2	1	6	1	4	1	4	1
C12orf29	15	11	20	35	27	45	10	13	23	4	1	3	4	1	3	1	1	1	2	5	23	19	17	11	23	16	23	2	6	19	10	2	1	2	7	1	6	1	6	6	3	1	1	6	4	2	4	6	1
C12orf4	11	7	10	36	29	28	8	13	19	2	2	2	4	1	2	1	1	2	3	10	14	11	13	27	26	17	25	10	6	19	7	8	1	2	5	2	7	1	8	8	3	4	2	8	1	2	1	6	3
C12orf40	10	14	16	42	33	39	6	20	20	1	2	3	1	1	3	2	1	1	1	5	15	10	12	11	11	20	14	6	5	5	3	1	1	2	12	1	1	1	2	2	2	1	1	3	2	2	1	5	3
C12orf42	11	10	16	31	35	40	11	13	17	1	1	1	1	1	2	1	1	1	1	6	11	10	10	13	23	19	18	6	6	6	2	3	1	2	8	2	4	1	4	2	1	1	3	5	3	2	2	5	1
C12orf43	14	6	17	30	27	52	10	11	15	1	2	3	10	1	2	2	1	2	1	12	16	23	25	17	26	33	28	10	3	8	7	5	1	5	1	4	9	3	8	3	1	2	1	6	3	2	2	8	1
C12orf50	11	8	24	40	35	40	8	14	18	1	2	1	1	1	2	1	1	1	1	15	18	20	16	12	39	26	28	5	6	3	6	1	1	6	8	1	7	4	6	1	1	3	5	2	3	2	5	3	4
C12orf54	11	6	9	32	23	25	8	11	9	1	2	1	1	1	1	1	1	1	1	8	15	12	17	24	20	25	24	4	2	6	4	1	1	1	22	4	3	1	2	2	1	3	3	4	1	1	4	5	1
C12orf56	16	16	21	38	38	39	11	21	27	1	3	7	6	1	7	1	1	3	2	7	17	14	13	24	29	20	32	4	5	7	10	4	1	5	8	5	2	3	4	5	2	1	4	3	1	3	2	6	1
C12orf57	40	30	66	108	133	155	29	39	66	13	15	16	17	6	8	7	5	25	8	39	54	46	49	50	47	39	72	133	27	127	42	29	1	19	55	2	33	28	18	28	11	8	5	24	11	10	6	11	1
C12orf60	11	11	12	33	30	37	18	11	18	1	2	1	1	1	6	1	1	4	2	6	20	10	20	16	30	26	23	6	3	12	5	3	1	2	5	6	6	1	3	4	6	2	3	2	1	3	2	6	1
C12orf66	10	3	9	40	41	40	19	18	29	2	2	4	2	1	5	1	2	7	1	10	28	14	22	25	36	25	26	9	7	13	10	3	1	2	12	1	1	2	3	3	1	1	1	6	1	1	5	6	1
C12orf71	10	12	7	29	23	24	10	11	9	2	1	3	3	1	1	1	1	2	2	9	16	18	8	17	18	21	21	2	2	10	3	5	1	2	6	1	1	1	1	1	1	2	1	2	1	1	3	6	1
C12orf73	5	5	14	43	23	35	15	9	16	1	2	1	1	1	5	1	1	1	1	13	14	17	18	20	24	28	20	3	6	7	4	3	1	2	9	2	4	2	1	4	2	1	1	2	1	4	2	6	2
C12orf75	39	9	26	30	119	109	8	47	14	4	8	11	2	3	3	2	2	6	4	10	94	42	37	33	14	13	64	28	3	37	9	17	1	3	21	1	5	6	5	14	3	10	1	5	1	7	6	8	4
C12orf76	15	8	12	36	30	57	7	14	15	1	2	3	1	1	2	1	1	2	1	20	27	12	23	30	26	21	30	10	15	20	6	5	1	4	11	1	6	1	8	6	3	1	2	5	3	2	2	4	3
C13orf42	17	12	18	31	39	50	9	5	18	2	1	6	4	1	4	1	1	2	1	7	17	13	12	17	16	27	22	3	5	8	5	5	1	4	2	1	7	1	3	1	2	2	1	4	2	1	1	8	1
C13orf46	16	10	11	42	26	43	12	14	22	1	1	1	5	1	5	3	1	2	1	3	20	18	21	21	20	19	27	4	3	9	5	5	1	2	5	3	3	3	3	3	1	1	1	5	4	1	1	6	1
C14orf119	35	11	40	69	53	70	17	19	31	1	8	9	6	5	7	2	2	6	5	19	24	26	21	24	27	31	41	15	2	28	8	8	1	2	15	3	8	7	4	8	1	2	1	5	5	1	3	7	1
C14orf132	11	6	15	32	37	39	7	10	13	1	4	2	1	1	4	1	1	1	1	6	18	13	8	12	21	21	23	4	3	8	5	3	1	3	9	1	9	1	5	3	2	1	2	1	2	1	1	4	2
C14orf177	10	9	20	35	39	52	10	12	17	2	1	3	1	1	1	1	1	1	1	5	13	18	20	20	23	26	24	8	8	10	2	3	1	2	6	2	3	1	8	2	5	1	1	2	4	2	3	2	2
C14orf178	18	14	23	36	43	56	10	12	20	1	1	1	1	1	7	1	1	1	1	12	18	6	18	20	21	17	34	2	4	9	5	1	1	1	7	1	5	5	6	3	4	1	1	2	1	1	3	4	1
C14orf180	16	9	17	26	38	51	7	15	17	1	1	1	1	1	1	1	1	1	1	5	15	10	16	11	25	15	7	10	3	7	5	3	1	2	5	4	3	3	1	4	2	1	1	2	2	2	1	7	2
C14orf28	12	12	14	38	36	89	7	12	22	3	1	4	1	1	5	1	1	2	1	5	24	22	24	13	54	28	37	15	7	16	5	6	1	3	11	1	13	4	2	4	8	2	3	5	2	2	1	3	4
C14orf39	5	12	11	44	32	42	8	12	16	1	2	2	4	1	3	1	1	1	1	13	17	14	11	15	27	20	16	4	4	4	7	4	1	4	9	1	2	2	2	3	1	1	1	6	4	2	1	3	2
C14orf93	8	4	17	31	30	28	7	16	14	1	1	2	2	1	2	1	1	3	1	8	11	11	11	14	26	16	20	5	1	13	2	2	1	1	7	2	4	3	1	1	2	1	2	4	4	2	1	3	2
C15orf39	21	13	21	34	57	61	14	20	20	5	2	8	5	5	1	2	1	10	3	8	31	18	19	21	29	36	34	11	5	18	6	6	1	5	4	1	10	1	2	6	3	1	5	11	2	1	6	7	2
C15orf40	19	10	21	44	32	45	12	12	20	2	4	4	3	2	3	3	1	4	1	6	10	19	17	19	30	11	32	12	4	17	7	4	1	1	10	1	12	3	2	4	1	6	2	5	2	1	3	6	1
C15orf48	1122	538	1497	2335	2762	3519	386	1172	952	19	43	39	28	9	15	13	11	71	31	106	383	367	358	421	167	140	519	224	51	262	135	125	1	49	80	39	84	62	51	99	37	118	38	87	31	12	17	32	9
C15orf61	18	13	24	35	31	37	14	15	23	3	2	4	3	1	5	1	1	2	2	13	22	13	19	22	29	19	32	13	5	11	3	6	1	1	7	1	9	3	4	2	1	4	2	6	2	4	3	8	3
C15orf62	7	12	16	38	27	38	6	7	25	1	1	1	2	4	4	1	1	1	1	10	21	19	15	18	27	21	21	5	4	7	6	3	1	4	13	3	5	5	3	2	1	4	1	1	2	1	4	6	3
C15orf65	10	10	16	32	32	31	11	14	14	4	1	2	1	1	3	1	1	1	1	6	11	18	10	21	23	23	27	4	3	11	6	1	1	2	3	2	6	1	1	2	1	2	1	3	2	2	1	4	3
C16orf46	21	17	24	71	36	53	6	14	25	1	1	5	2	1	5	4	1	1	1	7	20	11	23	23	34	34	28	5	5	7	5	2	1	2	13	2	2	2	4	5	2	1	3	8	1	1	1	2	1
C16orf54	14	11	17	34	21	36	12	11	20	2	1	1	3	1	5	1	2	1	2	5	9	4	10	16	22	10	9	6	2	7	2	2	1	3	8	2	2	1	2	2	1	1	1	1	3	4	5	4	1
C16orf70	10	15	19	41	39	36	7	12	33	6	2	2	5	1	7	1	1	4	3	15	30	21	35	23	30	30	26	13	6	41	9	6	1	5	9	1	5	7	5	5	4	2	3	8	4	1	3	6	3
C16orf72	11	8	13	23	36	33	13	11	14	1	4	4	3	3	3	2	1	7	4	6	19	24	11	15	23	27	33	7	4	9	7	4	1	1	8	1	9	1	8	6	3	4	1	4	1	7	3	7	1
C16orf74	14	10	20	48	56	47	12	30	25	1	2	1	6	2	8	4	1	3	1	15	20	14	28	13	32	25	30	8	7	9	5	5	1	1	4	6	6	2	1	2	1	2	3	2	1	4	7	11	4
C16orf78	52	19	71	73	123	176	19	44	45	1	1	6	7	5	6	3	1	2	5	17	29	29	23	24	35	28	43	10	7	21	11	9	1	3	10	3	6	15	7	9	2	1	6	9	2	3	5	8	1
C16orf82	5	6	10	25	25	22	5	10	16	4	1	1	2	1	3	2	1	1	1	13	15	10	12	20	34	17	27	2	2	7	7	4	1	3	22	1	5	1	4	1	3	1	6	2	2	1	2	6	3
C16orf86	8	15	18	44	39	50	13	13	28	2	3	1	5	1	2	1	1	1	1	12	15	17	15	16	26	21	29	10	4	6	6	4	1	4	14	4	7	3	5	3	2	1	3	5	2	1	2	3	2
C16orf87	13	9	7	29	30	37	10	8	19	2	3	1	3	1	2	2	2	3	1	4	18	15	25	14	19	11	18	9	5	11	3	1	1	7	2	1	3	3	4	1	4	1	2	7	1	1	3	9	2
C16orf89	14	12	16	34	27	27	5	10	22	1	2	1	4	1	2	2	1	2	1	12	16	18	14	19	26	16	31	6	2	12	2	8	1	4	7	1	3	1	2	5	2	3	2	4	5	6	2	11	1
C16orf90	23	8	20	34	43	52	9	11	18	1	1	4	1	1	2	1	1	3	1	5	13	15	8	20	16	16	20	7	5	9	9	4	1	3	36	1	6	2	2	3	3	1	2	2	1	3	1	6	4
C16orf91	21	14	13	37	52	56	10	15	23	3	3	3	2	1	4	1	1	3	3	10	17	12	16	24	27	30	25	4	3	17	9	3	1	5	8	1	9	6	12	3	3	5	1	3	2	2	1	7	2
C16orf92	4	8	17	44	36	39	7	20	19	1	1	1	1	1	4	1	3	1	1	8	14	15	19	23	38	23	27	5	6	10	6	2	1	4	6	1	2	1	3	1	1	1	1	3	1	1	2	2	1
C16orf95	14	11	15	48	32	48	11	11	24	1	1	5	8	1	5	1	1	7	1	9	18	13	16	14	20	21	24	6	7	10	6	6	1	3	10	2	7	2	4	6	3	1	1	7	2	5	2	7	1
C16orf96	15	11	7	17	32	33	5	13	13	1	2	2	1	1	2	1	1	1	1	3	4	9	7	13	23	16	16	5	4	7	1	2	1	1	7	1	1	1	3	1	1	1	1	3	2	1	2	4	1
C17orf100	8	8	17	34	29	45	15	8	15	1	3	2	1	1	2	1	1	1	2	6	17	15	13	14	22	20	23	11	3	13	7	1	1	1	5	1	4	1	3	1	1	2	2	2	1	4	2	5	1
C17orf107	9	9	14	30	29	39	10	9	11	1	1	1	1	1	1	1	1	1	1	7	7	11	18	10	14	9	17	5	2	5	2	1	1	3	3	1	4	2	2	1	2	3	1	2	2	1	6	8	2
C17orf113	9	8	13	24	24	19	2	7	18	1	1	4	1	1	2	1	1	3	3	7	10	7	9	14	23	16	15	6	1	7	5	1	1	1	7	2	3	2	5	1	1	1	1	1	1	1	1	5	1
C17orf49	14	9	12	45	59	56	16	14	17	6	5	16	9	5	6	2	3	15	6	10	14	35	35	19	36	25	35	14	8	20	11	14	1	6	11	2	7	5	11	8	4	11	4	6	1	2	7	5	3
C17orf50	13	14	16	44	35	54	17	7	17	3	1	1	1	1	3	1	1	1	1	14	25	18	17	25	30	23	40	6	3	7	3	5	1	1	8	1	4	4	3	3	1	1	1	9	3	2	1	6	1
C17orf58	35	19	35	82	67	85	15	26	40	3	8	8	7	7	2	2	2	7	8	10	25	18	20	16	26	24	31	14	6	19	10	6	1	5	29	1	6	8	8	6	2	1	3	7	5	4	1	3	4
C17orf64	9	11	9	17	23	33	7	9	15	1	1	1	1	2	18	1	1	1	1	2	5	4	13	4	16	8	16	2	2	1	3	1	1	1	5	3	4	1	2	1	2	1	1	2	1	3	6	4	1
C17orf67	6	14	10	33	19	25	11	9	13	1	1	2	4	2	3	1	1	1	1	10	14	15	27	15	33	20	40	7	2	5	5	2	1	3	14	1	8	1	4	1	2	1	2	4	5	1	1	9	1
C17orf75	22	9	18	48	47	54	5	12	26	1	1	3	4	3	6	2	2	5	2	21	23	22	26	34	39	40	43	5	10	8	4	3	1	5	7	4	10	4	7	6	3	3	3	6	1	1	1	7	3
C17orf78	11	9	5	31	36	33	10	7	20	1	1	1	1	1	3	1	1	1	1	9	9	12	8	14	19	15	21	2	2	7	2	4	1	3	6	1	2	1	3	1	1	1	2	4	1	2	1	7	1
C17orf80	14	18	20	48	23	46	9	10	16	2	3	4	6	2	6	1	1	10	4	12	17	20	9	19	31	29	38	12	8	11	5	1	1	7	13	2	6	4	4	4	2	2	4	3	5	1	1	8	4
C17orf97	24	19	20	67	59	87	17	20	22	1	5	8	2	7	9	1	2	6	5	10	15	25	26	14	26	25	34	6	11	8	7	2	1	3	6	2	8	4	13	2	5	1	3	7	3	1	2	6	1
C17orf98	11	8	17	31	32	41	13	7	19	1	1	3	2	2	3	3	1	2	2	9	9	9	11	19	30	11	21	1	4	8	5	4	1	4	9	5	4	2	3	2	1	3	2	2	1	2	2	2	1
C17orf99	16	18	15	45	49	40	9	10	22	2	4	1	1	1	3	2	1	1	2	1	10	12	21	18	28	13	25	3	6	9	9	2	1	1	11	1	8	2	3	4	3	2	1	4	2	1	1	8	2
C18orf21	10	17	22	43	35	43	17	11	23	2	5	5	4	1	8	1	1	3	2	15	12	22	24	22	34	19	26	5	4	14	8	7	1	2	6	2	7	1	7	4	1	3	4	4	2	1	1	10	1
C18orf25	14	14	18	45	43	65	12	12	24	5	5	6	2	1	3	2	1	11	1	15	20	19	23	32	44	26	27	6	11	13	6	11	1	3	11	3	9	3	7	7	7	3	2	8	4	2	1	5	3
C18orf32	10	9	15	36	32	28	8	5	13	4	5	4	3	2	6	2	1	9	5	7	11	10	14	10	26	19	15	5	7	8	6	3	1	3	5	1	10	2	3	7	4	4	7	5	8	7	5	11	3
C18orf54	17	16	13	48	36	42	16	13	18	1	3	2	5	2	6	1	3	1	1	17	19	27	24	35	51	32	36	6	11	8	2	4	1	4	25	1	8	1	3	8	3	1	1	4	2	1	3	8	2
C18orf63	12	5	17	28	38	28	4	5	19	1	2	1	2	1	10	1	1	2	1	8	11	13	16	16	42	18	20	2	2	14	3	3	1	1	3	1	5	1	1	2	1	1	2	4	1	1	3	7	1
C19orf12	14	19	9	40	34	36	16	10	23	2	2	1	7	2	5	1	1	2	2	18	28	18	27	25	31	29	32	12	12	15	6	4	1	8	12	4	10	1	6	7	5	5	1	8	5	1	4	5	2
C19orf18	15	9	13	46	45	37	7	18	32	2	1	1	2	1	5	1	1	1	1	11	20	11	18	29	31	25	21	5	4	10	3	5	1	1	13	1	4	4	3	3	5	3	3	3	1	2	3	4	2
C19orf25	14	12	26	42	48	36	15	16	27	2	1	6	2	1	5	1	1	5	2	19	32	15	19	22	45	25	30	11	10	30	7	12	1	4	8	1	4	7	6	5	3	1	2	5	6	7	4	11	3
C19orf33	50	7	137	39	302	512	12	71	21	7	102	126	4	56	4	1	1	111	39	8	250	206	144	171	21	18	205	134	2	184	99	89	1	4	55	2	12	61	2	67	8	30	2	76	2	4	27	62	2
C19orf38	22	11	11	40	45	60	15	14	25	2	1	3	2	1	3	1	2	2	1	7	18	13	19	16	32	25	21	2	2	8	4	3	1	3	5	1	2	5	6	3	1	3	5	5	2	1	3	4	1
C19orf44	12	8	14	34	38	46	14	12	20	1	6	5	3	1	3	1	2	1	1	10	10	17	11	19	24	15	31	10	3	14	7	5	1	5	5	2	7	5	2	4	1	1	3	5	1	3	3	5	6
C19orf47	7	10	24	48	55	43	10	12	18	1	2	5	6	1	7	1	1	7	2	8	25	18	15	15	29	17	37	9	1	13	6	2	1	5	18	3	6	1	4	9	2	1	3	6	4	2	1	5	2
C19orf48	20	13	22	52	43	71	7	13	32	2	12	8	4	10	5	4	1	12	3	11	30	17	23	33	28	22	32	18	7	32	7	8	1	6	25	1	9	8	5	8	3	7	3	8	3	2	8	13	2
C19orf53	24	16	45	83	108	117	13	25	19	2	9	11	5	5	2	1	4	16	6	16	40	37	35	20	16	34	46	21	12	51	19	16	1	6	8	2	16	9	13	10	5	10	2	22	6	2	5	10	4
C19orf54	8	9	10	35	31	37	13	11	16	4	1	3	5	2	8	1	2	2	3	10	18	23	20	29	30	22	26	11	1	6	4	2	1	2	9	2	5	2	2	2	1	3	4	3	3	4	1	10	1
C19orf67	12	12	23	45	40	43	15	20	23	1	1	3	2	1	3	1	2	2	2	7	20	12	14	18	27	17	28	5	5	9	1	7	1	1	6	2	3	1	6	1	1	2	1	1	1	1	3	4	2
C19orf71	13	11	15	22	33	28	6	13	15	1	1	1	2	1	3	1	1	1	1	10	7	10	9	9	16	14	16	7	5	7	3	2	1	3	15	1	4	1	2	1	1	1	2	4	3	5	1	7	2
C19orf73	14	12	13	40	29	42	7	10	25	4	1	4	2	1	5	1	1	2	1	6	12	17	17	20	29	22	25	3	3	10	6	2	1	2	18	1	5	3	4	1	3	2	4	5	3	2	2	3	1
C19orf81	22	15	21	45	36	51	9	22	23	1	1	1	3	1	4	3	1	4	1	11	20	20	9	21	32	27	37	11	5	8	7	7	1	2	13	1	10	3	9	12	2	1	5	1	2	1	2	2	1
C19orf84	19	9	37	60	58	55	11	14	29	3	2	6	3	2	4	1	1	2	1	10	23	21	23	22	54	26	32	8	6	13	4	6	1	2	21	2	6	1	11	2	1	3	2	2	5	2	2	3	1
C1D	20	15	15	33	58	59	15	13	17	2	7	3	4	1	6	1	1	4	3	9	36	30	32	30	42	20	49	6	11	25	12	14	1	4	12	3	6	1	10	6	3	3	5	6	3	2	3	5	1
C1GALT1	33	12	33	48	123	95	12	29	18	4	15	19	2	3	5	2	1	21	11	10	44	39	24	31	30	35	41	23	7	50	18	14	1	1	13	2	8	20	5	10	3	6	1	12	2	1	1	5	3
C1GALT1C1	24	14	22	56	45	64	6	20	19	1	7	13	5	3	4	1	2	15	2	16	30	29	26	26	32	25	41	9	5	19	13	7	1	1	8	4	7	6	8	6	6	7	3	13	2	2	3	9	4
C1GALT1C1L	9	13	19	33	32	25	8	8	13	1	1	1	2	1	4	2	2	1	1	10	13	14	16	14	23	18	34	6	3	5	6	3	1	1	5	1	3	1	1	5	2	1	1	1	1	1	3	6	1
C1orf100	15	3	21	38	42	36	9	13	16	1	1	2	5	1	3	1	2	1	1	15	21	16	11	13	22	26	23	8	6	13	5	6	1	3	6	4	4	2	3	2	4	2	2	5	1	1	2	4	2
C1orf105	9	12	12	36	32	50	9	13	25	1	1	2	3	1	3	1	1	1	1	7	20	18	14	20	28	20	35	6	5	14	1	1	1	1	4	1	4	1	4	2	5	1	1	2	1	1	1	6	2
C1orf109	12	22	13	39	33	27	15	16	17	2	2	1	5	1	2	1	1	2	1	8	17	19	21	21	46	32	44	9	7	16	9	7	1	1	11	2	10	4	6	3	5	4	4	5	1	2	1	9	2
C1orf112	9	7	12	26	30	39	4	17	19	1	3	4	5	4	1	1	1	5	7	3	15	15	15	16	17	27	25	8	5	11	3	6	1	2	11	2	5	2	4	9	2	1	1	3	2	3	6	9	2
C1orf115	30	16	23	48	66	95	10	26	23	1	13	13	1	3	3	3	1	3	2	12	43	19	24	31	27	49	48	7	4	13	4	8	1	3	11	2	7	4	6	5	3	4	3	4	2	3	3	9	1
C1orf116	33	18	28	41	126	84	15	30	19	2	7	4	4	6	4	1	1	4	5	10	45	23	37	36	22	24	59	11	8	53	15	14	1	2	15	1	6	4	4	13	3	13	1	11	1	1	2	7	2
C1orf122	6	15	13	40	18	38	5	19	14	1	4	7	4	1	1	2	3	2	1	11	18	17	25	21	27	15	34	6	3	14	5	7	1	3	10	1	4	4	6	6	2	1	4	3	3	3	1	5	4
C1orf127	14	4	17	33	20	32	5	8	14	4	1	1	1	2	2	1	1	2	1	8	12	9	14	21	18	20	24	3	6	4	4	1	1	2	8	1	6	1	3	1	1	1	1	4	1	1	3	1	1
C1orf131	20	8	20	35	45	46	6	14	17	2	7	8	1	3	4	1	1	10	3	9	39	40	28	25	31	16	40	10	8	20	8	4	1	6	5	1	8	5	4	9	1	3	1	8	2	3	1	6	1
C1orf141	11	10	13	47	30	36	11	14	21	2	1	1	2	1	4	1	2	1	1	14	23	14	12	17	27	14	24	7	6	5	4	1	1	1	13	4	5	4	6	4	2	2	1	2	1	2	3	9	2
C1orf146	10	11	14	29	31	36	10	18	16	1	1	2	3	1	3	1	1	1	1	3	23	15	18	18	23	9	16	2	5	8	4	3	1	1	15	1	6	2	3	1	1	1	1	5	2	1	3	8	1
C1orf158	11	9	22	38	28	38	11	22	18	1	1	1	1	1	3	2	1	1	1	4	10	14	10	14	17	10	17	3	9	7	2	3	1	1	6	1	1	1	2	3	3	3	1	4	1	1	1	5	1
C1orf159	14	7	15	31	30	36	7	8	17	1	2	3	1	1	4	1	1	3	2	7	13	18	19	22	25	13	28	5	8	13	4	2	1	2	7	1	6	1	4	4	1	4	2	3	1	1	2	7	3
C1orf162	9	13	9	32	29	41	10	9	25	3	1	1	10	1	11	8	7	2	1	10	14	16	16	20	30	16	15	4	6	4	4	1	1	9	4	4	7	2	4	1	1	1	4	4	5	4	7	7	2
C1orf167	8	11	10	24	34	28	7	4	21	1	1	1	1	1	4	1	1	3	1	16	18	17	19	14	26	18	27	5	2	6	11	3	1	2	1	1	5	3	4	2	1	2	2	2	3	1	1	5	4
C1orf174	50	26	62	84	113	175	33	50	44	2	10	11	7	6	5	1	2	12	5	21	44	34	37	37	37	27	59	36	8	61	11	15	1	6	29	3	20	16	4	12	3	14	3	10	5	2	2	13	1
C1orf185	8	8	7	41	28	36	11	11	17	1	1	1	1	2	5	1	2	1	1	6	16	15	12	19	36	26	29	7	6	3	2	3	1	1	5	1	5	1	3	3	1	2	2	4	1	1	4	4	2
C1orf189	9	9	11	14	31	31	4	9	13	1	1	2	1	1	4	1	1	1	1	16	11	10	12	9	20	26	20	5	2	5	2	1	1	2	10	2	8	2	1	4	2	1	1	2	3	1	1	6	1
C1orf194	24	10	15	41	45	42	16	16	21	1	2	2	3	1	5	1	1	5	1	7	10	15	23	25	29	20	21	8	10	6	3	3	1	2	9	1	8	5	3	4	1	2	2	6	1	2	1	2	1
C1orf198	17	64	35	208	71	91	26	34	166	16	16	12	30	7	32	16	14	8	5	83	89	61	53	46	73	64	64	23	49	42	9	10	1	13	18	3	72	16	23	9	14	9	6	18	17	3	3	15	1
C1orf21	12	10	19	23	35	38	6	10	13	1	3	6	2	4	1	1	1	7	3	11	32	14	22	14	40	28	31	11	5	19	13	3	1	2	38	1	9	4	7	8	3	3	1	11	1	1	10	7	2
C1orf210	10	12	17	24	32	58	12	13	14	3	3	2	1	2	2	1	1	3	3	8	31	16	22	26	23	17	36	11	7	22	8	2	1	4	9	1	4	4	4	4	1	1	1	4	7	3	1	10	1
C1orf216	12	18	19	48	26	53	7	17	24	8	4	4	5	2	8	4	1	4	2	14	21	13	18	17	23	17	24	12	10	14	4	3	1	6	8	1	6	4	15	6	8	1	3	3	2	2	1	5	3
C1orf226	12	12	19	29	28	37	7	9	14	1	2	5	3	2	9	1	1	3	3	12	28	16	16	16	31	23	24	10	4	8	9	6	1	2	9	1	5	2	3	2	1	2	2	5	4	1	4	11	1
C1orf232	8	5	14	24	17	32	7	6	17	1	2	1	7	1	2	2	1	2	1	8	20	19	22	19	25	20	31	7	2	8	4	2	1	4	9	1	4	1	4	2	1	1	4	6	1	2	1	5	2
C1orf35	12	8	20	32	44	40	16	18	16	1	2	5	5	2	4	1	1	4	3	11	10	10	17	17	22	19	25	6	4	12	8	5	1	1	12	3	7	4	2	1	4	5	2	5	2	1	7	8	2
C1orf43	48	20	106	138	182	224	21	59	53	19	46	41	12	11	8	8	6	51	25	28	64	45	43	31	47	21	51	81	11	182	53	37	1	9	44	1	27	31	16	30	10	13	6	31	3	2	5	8	4
C1orf50	8	8	11	32	27	36	6	7	23	1	1	4	1	1	3	3	1	3	1	12	17	15	21	13	26	21	24	9	11	19	6	4	1	3	12	1	12	1	7	2	1	2	4	3	1	3	3	11	2
C1orf52	24	14	22	55	51	51	12	16	23	4	7	12	9	4	10	6	4	10	5	13	41	33	26	26	39	21	45	16	4	28	13	9	1	3	13	1	12	14	5	8	9	5	4	17	3	3	1	8	1
C1orf53	8	14	22	45	33	50	12	18	22	1	1	1	1	1	3	2	1	1	3	11	17	18	14	23	38	29	16	7	8	8	3	7	1	3	14	1	2	2	7	3	3	2	4	8	1	1	2	6	1
C1orf54	13	10	10	54	32	33	7	11	13	2	1	1	4	1	3	3	1	1	1	7	18	12	19	14	31	21	19	9	4	13	8	3	1	2	3	1	5	2	3	4	3	5	1	5	3	2	1	3	4
C1orf56	7	10	11	32	45	27	10	9	26	1	1	1	1	1	5	1	1	2	1	5	19	17	11	20	27	22	21	6	5	7	4	1	1	2	7	1	8	2	2	1	1	1	1	2	3	1	1	8	1
C1orf68	11	12	15	40	48	47	20	14	20	1	1	4	1	1	4	1	1	2	1	8	15	8	9	11	15	19	25	9	2	7	4	2	1	2	6	1	5	3	4	1	1	2	2	2	5	1	1	5	2
C1orf74	7	8	15	22	41	56	11	23	16	1	3	2	5	1	3	4	2	3	2	7	14	18	19	28	27	23	20	5	1	13	6	1	1	4	11	1	7	2	5	5	1	5	1	7	2	3	2	3	3
C1orf87	11	6	13	36	25	30	7	10	16	1	1	1	2	1	2	1	1	1	2	6	14	9	9	13	27	12	20	1	4	8	6	2	1	3	5	1	4	1	7	2	1	3	1	2	2	4	4	9	1
C1orf94	17	14	12	37	29	43	11	12	14	1	2	1	1	1	1	1	2	1	2	4	20	13	8	22	33	21	33	7	5	4	5	5	1	2	7	1	2	2	1	1	2	1	1	6	4	2	4	2	2
C1QA	11	23	11	52	22	44	17	15	26	14	1	4	17	2	14	6	3	1	1	20	16	18	15	17	29	22	26	3	16	6	2	2	1	2	7	2	26	8	7	4	1	4	5	4	12	2	4	8	1
C1QB	62	58	67	110	148	170	46	61	70	43	6	12	53	6	64	42	26	9	5	69	45	39	43	43	56	43	46	34	37	40	12	15	1	15	19	2	45	19	25	14	22	7	16	23	17	5	4	7	2
C1QBP	56	39	58	117	173	171	33	69	57	9	27	29	6	15	16	2	1	25	19	21	74	50	40	30	39	26	70	33	9	41	22	20	1	6	23	2	12	16	19	13	7	2	8	16	8	9	4	6	1
C1QC	12	31	17	65	34	51	24	10	43	21	2	2	47	2	26	11	9	1	3	27	22	21	25	29	55	42	33	5	12	10	7	2	1	6	15	1	26	1	13	4	7	6	7	7	18	1	1	5	2
C1QL1	37	20	42	99	104	146	24	47	60	4	1	3	6	2	5	2	1	4	1	14	26	23	17	18	19	16	41	7	6	11	9	6	1	2	7	1	9	3	4	6	3	1	3	5	3	3	1	10	3
C1QL2	11	17	32	49	61	82	11	14	21	1	1	2	2	1	5	1	1	1	1	8	26	14	11	17	47	22	26	6	5	12	1	3	1	4	10	1	9	1	3	4	2	4	1	4	2	3	2	16	5
C1QL3	57	15	79	78	133	210	24	58	38	1	1	1	1	1	2	2	1	1	1	20	49	51	49	48	30	35	50	10	10	12	3	3	1	5	7	2	3	5	7	10	3	4	3	7	2	2	2	6	1
C1QL4	20	19	30	55	51	67	14	28	25	1	1	3	1	1	2	1	1	2	2	13	24	15	19	27	34	22	24	6	5	7	5	4	1	2	10	1	4	2	3	6	1	1	2	3	2	3	1	10	1
C1QTNF1	56	21	54	63	93	146	21	46	47	1	7	7	4	2	4	1	1	3	5	12	26	39	37	26	32	24	40	14	6	41	7	12	1	6	14	3	13	10	6	6	4	6	4	1	7	6	1	3	2
C1QTNF12	11	15	19	35	25	33	9	15	15	1	1	1	1	1	6	4	1	5	1	10	15	11	21	17	33	28	14	12	2	7	5	4	1	2	7	1	4	2	2	1	2	2	1	5	4	3	2	5	5
C1QTNF2	12	5	14	27	31	44	8	2	19	2	2	3	2	1	5	1	2	1	1	8	12	6	9	16	18	14	19	8	5	5	3	2	1	7	8	1	5	2	7	2	1	2	1	2	1	1	1	5	1
C1QTNF3	7	3	10	46	24	38	7	4	12	2	2	4	2	1	4	1	1	2	1	14	17	16	14	19	28	20	26	4	4	10	3	3	1	3	16	1	4	1	3	1	1	2	2	1	1	3	1	10	1
C1QTNF4	21	21	16	53	40	34	12	14	22	1	3	2	1	1	6	1	1	1	1	4	15	21	21	20	42	22	26	5	9	9	8	6	1	2	18	2	10	1	8	2	3	2	3	1	1	3	5	3	1
C1QTNF5	11	12	8	32	28	43	6	11	12	3	1	1	2	1	3	2	1	1	2	12	23	17	15	16	19	13	21	9	7	8	4	2	1	2	8	3	8	2	1	2	3	1	2	2	1	1	4	5	1
C1QTNF6	44	20	42	69	104	123	21	48	44	2	3	2	4	1	4	2	1	3	2	17	36	30	24	41	33	28	40	8	2	11	4	6	1	6	7	1	6	3	8	3	2	6	4	2	1	1	6	8	2
C1QTNF7	15	9	22	44	31	49	16	17	17	2	1	1	3	1	1	1	1	1	1	11	15	12	19	27	31	25	29	12	6	6	4	3	1	3	11	1	6	1	7	2	3	1	3	9	4	2	1	5	4
C1QTNF8	7	5	10	17	28	24	6	5	15	1	2	1	1	1	1	1	2	1	1	6	10	11	10	10	18	15	18	6	1	1	2	2	1	3	2	1	3	1	1	1	2	1	2	1	3	3	1	6	2
C1QTNF9	16	15	17	36	43	34	12	7	20	1	1	1	2	1	2	1	1	1	1	3	10	16	19	16	21	11	28	5	4	3	4	4	1	2	3	2	2	4	4	2	1	2	2	3	1	3	1	5	1
C1QTNF9B	16	14	17	38	41	52	12	13	40	2	1	3	2	1	3	1	2	1	1	9	16	20	23	20	30	30	35	6	8	5	8	3	1	5	15	2	8	4	4	6	1	3	2	12	5	6	3	9	1
C1R	16	21	26	50	60	62	19	16	39	8	5	2	17	1	8	9	6	3	1	21	26	18	33	20	25	25	36	7	10	12	4	6	1	21	9	4	10	4	13	5	11	3	6	5	16	2	2	8	3
C1RL	15	21	27	43	49	72	17	26	30	3	3	2	6	1	7	1	3	3	3	7	26	23	25	26	32	24	25	11	6	27	7	7	1	6	9	1	6	12	3	12	3	1	2	15	5	1	4	6	4
C1S	15	35	24	56	54	47	36	23	42	15	1	4	45	3	24	16	18	3	5	21	13	18	25	15	58	35	27	9	19	13	10	8	1	15	16	1	24	3	24	5	12	3	16	7	20	3	3	11	4
C2	18	14	17	46	35	62	12	17	25	1	1	1	2	1	5	1	1	1	1	6	26	24	15	22	18	11	27	2	2	10	4	3	1	3	2	2	4	1	3	2	4	2	1	6	3	3	3	3	1
C20orf141	12	17	13	49	36	43	12	19	24	3	1	1	1	1	3	1	1	2	1	9	16	18	21	24	27	27	25	9	5	14	8	2	1	23	7	1	5	1	4	3	4	1	1	4	4	1	1	3	2
C20orf144	8	5	16	38	47	47	10	15	29	1	3	7	5	1	1	3	1	2	2	13	20	10	12	20	29	24	38	6	1	8	4	4	1	1	5	1	1	3	3	4	4	1	3	3	3	2	2	10	1
C20orf173	16	7	13	46	31	55	8	19	21	1	2	3	5	1	3	1	1	1	1	12	18	14	21	16	25	21	38	5	3	10	3	5	1	2	7	1	7	2	3	3	2	3	3	6	1	2	1	5	3
C20orf202	6	9	14	53	39	42	10	18	27	1	1	1	4	2	7	1	1	2	1	21	31	23	22	30	52	33	49	9	14	13	6	2	1	9	19	2	3	4	7	4	5	3	2	3	2	2	2	12	2
C20orf203	3	4	9	26	25	30	9	8	14	1	1	2	2	2	2	1	1	1	1	12	16	11	18	14	41	26	22	3	7	3	5	2	1	1	6	2	8	5	3	1	1	3	1	4	3	2	2	11	1
C20orf204	8	10	11	28	31	36	8	10	16	1	1	1	2	1	2	2	1	1	1	4	16	15	18	14	25	22	20	7	6	10	5	2	1	1	11	1	6	2	2	4	1	1	3	4	1	2	1	9	1
C20orf27	17	5	9	23	24	28	4	12	19	1	1	2	1	1	4	1	1	1	2	12	21	18	13	15	20	14	20	4	3	5	2	3	1	3	10	1	13	3	2	1	2	1	2	2	1	2	2	4	5
C20orf85	11	10	5	39	29	35	6	9	28	1	1	2	2	3	4	1	1	1	3	5	19	12	15	22	33	14	29	8	3	5	6	2	1	3	4	1	1	1	6	3	4	4	4	1	1	3	1	8	4
C20orf96	17	9	15	27	37	43	12	7	21	1	5	2	4	3	4	1	4	4	1	10	7	14	22	18	17	15	26	6	8	14	4	5	1	3	6	1	9	2	2	7	4	2	5	6	2	4	2	4	1
C21orf58	16	17	29	59	72	82	16	26	47	1	1	2	1	2	2	1	1	4	1	10	31	29	32	32	34	27	47	6	7	12	3	5	1	6	10	3	9	5	6	5	5	3	3	4	4	4	4	5	2
C21orf62	18	7	13	39	32	41	9	15	22	1	1	1	3	1	2	1	1	2	1	14	23	10	11	12	35	25	21	6	2	4	6	1	1	2	4	2	5	1	3	4	1	1	3	4	1	2	5	6	3
C21orf91	13	10	13	32	37	37	5	10	13	1	6	3	4	2	4	2	2	3	2	8	19	20	21	24	25	25	33	14	5	13	4	3	1	1	7	4	5	4	7	3	2	1	2	5	2	2	3	9	2
C22orf15	13	6	6	25	25	44	5	6	14	3	2	1	5	1	4	1	1	1	1	6	12	19	7	20	31	15	14	5	3	5	5	1	1	1	7	1	1	3	3	2	1	1	1	4	1	2	4	5	1
C22orf23	29	25	48	55	96	117	15	30	42	1	6	9	4	3	4	4	2	2	2	12	26	24	24	33	28	26	33	18	8	32	4	6	1	7	13	1	13	4	6	6	2	2	2	2	3	6	2	3	3
C22orf31	23	11	23	45	54	54	13	25	25	1	2	4	6	2	4	1	1	5	3	5	33	29	20	25	20	27	34	9	1	14	4	4	1	1	11	2	7	5	6	8	2	4	5	10	1	1	1	4	1
C22orf39	61	26	71	161	172	205	18	44	49	2	3	3	6	2	5	3	1	8	5	15	46	34	47	37	43	25	69	19	6	59	26	11	1	4	42	3	11	12	4	11	2	7	4	14	5	2	3	7	5
C22orf42	10	16	20	44	30	47	6	14	15	1	1	1	2	1	3	1	2	3	1	9	17	17	14	26	28	19	24	11	5	9	5	1	1	4	8	1	5	4	2	3	1	1	1	6	2	2	3	2	3
C2CD2	15	10	16	48	59	61	15	27	32	2	3	4	8	3	3	1	3	5	3	19	29	14	29	19	33	24	25	10	7	18	7	8	1	3	13	3	9	7	12	6	3	1	4	7	1	1	3	4	1
C2CD2L	23	17	17	42	50	49	16	14	22	2	3	5	1	2	3	1	2	5	3	9	18	22	22	16	28	26	35	7	5	10	7	4	1	6	7	1	4	4	3	6	3	1	1	5	3	1	2	6	3
C2CD3	7	8	7	28	34	29	9	17	15	1	1	2	4	1	4	1	3	4	1	11	13	18	15	16	21	22	19	8	7	9	2	3	1	3	89	2	4	1	2	6	1	1	1	5	1	1	2	5	1
C2CD4A	8	4	12	36	34	53	5	8	18	1	1	1	4	1	1	1	1	4	1	7	9	13	21	10	17	17	16	12	2	12	5	2	1	3	15	1	7	4	5	7	2	1	1	4	1	4	3	5	2
C2CD4B	14	9	21	32	29	44	11	10	20	1	1	1	3	2	3	1	1	1	3	9	17	12	12	19	23	16	28	8	1	19	8	2	1	1	22	3	2	7	5	3	4	3	3	2	5	5	5	6	4
C2CD4C	7	11	13	39	38	49	4	10	17	1	1	1	5	1	4	1	1	1	1	13	14	12	13	21	25	22	25	8	2	14	8	4	1	2	6	1	9	1	5	2	1	4	3	6	1	2	1	2	2
C2CD4D	14	16	23	50	60	65	23	20	20	2	1	4	4	1	6	3	1	5	2	8	26	21	10	22	23	22	45	14	6	13	5	1	1	1	15	2	5	4	8	5	2	4	3	5	3	1	7	7	2
C2CD5	16	16	20	35	45	39	6	16	31	2	1	2	4	1	7	4	1	3	1	11	19	19	14	23	29	23	32	14	8	34	8	5	1	4	24	2	7	7	4	3	4	4	1	8	2	3	2	5	4
C2CD6	18	11	23	35	50	76	11	22	18	3	3	6	1	1	1	2	1	5	1	10	9	13	15	15	23	17	18	6	4	9	1	4	1	4	11	1	2	5	2	4	2	5	1	6	2	1	1	2	2
C2orf15	15	12	10	31	41	42	7	8	12	1	2	1	4	1	1	1	1	1	2	6	19	21	18	18	26	25	32	3	4	9	4	2	1	3	6	1	4	1	9	4	2	1	1	5	1	1	1	9	2
C2orf16	13	14	21	22	36	45	10	7	30	1	1	1	4	1	3	1	1	1	1	11	8	8	17	22	27	14	32	10	1	5	7	4	1	3	6	4	7	1	5	1	4	1	2	5	2	4	1	5	2
C2orf42	8	12	19	54	26	44	12	14	17	3	1	1	2	1	3	1	3	2	1	16	12	18	15	17	27	20	29	11	5	12	9	7	1	1	12	1	6	3	1	3	1	1	2	5	1	1	1	9	1
C2orf49	19	13	15	44	56	56	13	20	19	3	2	6	3	1	2	2	1	3	2	8	22	19	18	29	21	15	22	6	2	22	13	7	1	3	7	1	4	6	5	3	2	2	2	8	2	5	4	5	1
C2orf50	14	7	7	29	23	30	10	11	17	2	3	2	2	1	1	1	1	1	2	4	10	9	9	10	26	11	18	4	4	7	5	3	1	1	7	2	13	1	8	4	1	1	1	3	1	1	2	4	2
C2orf66	13	11	20	48	33	56	10	19	29	1	1	2	1	1	3	1	1	1	1	14	16	12	15	21	19	15	20	7	3	7	5	3	1	1	11	1	3	2	1	3	3	3	1	2	1	4	1	5	1
C2orf68	11	10	11	38	35	36	8	14	20	1	2	1	3	1	1	1	1	4	1	6	15	9	19	21	27	14	29	8	2	6	2	2	1	1	5	1	4	5	3	2	1	4	10	6	2	2	1	4	1
C2orf69	19	10	19	36	39	42	9	25	23	4	4	5	4	2	9	3	2	1	1	19	19	17	16	20	33	26	30	13	6	15	9	7	1	5	11	1	9	1	4	7	1	4	2	11	3	1	1	7	1
C2orf72	13	4	16	28	28	40	8	19	27	1	1	1	1	1	3	1	3	4	1	9	18	19	19	14	22	10	24	13	5	19	7	4	1	2	12	1	4	7	1	3	1	2	1	6	1	1	2	3	1
C2orf73	9	10	13	33	43	46	8	8	20	1	1	1	1	1	5	1	1	1	1	10	15	23	12	18	34	21	28	5	4	9	6	3	1	2	11	1	2	2	5	2	1	1	1	4	3	2	5	5	1
C2orf74	15	11	15	48	39	45	8	6	13	3	6	5	6	1	5	1	3	4	2	14	18	18	25	20	24	12	16	6	6	7	9	2	1	3	7	1	7	3	4	1	2	1	4	7	2	1	1	3	1
C2orf76	20	11	10	35	40	51	5	4	16	1	1	2	4	1	3	2	1	1	1	5	12	9	10	16	21	21	23	3	6	9	5	2	1	2	9	1	3	1	1	2	3	3	7	2	3	1	1	4	1
C2orf78	16	11	17	37	26	29	16	4	27	1	1	1	1	1	2	1	3	1	1	7	17	19	26	22	26	25	28	7	6	9	3	4	1	5	5	1	3	1	3	4	3	1	3	3	1	1	4	8	2
C2orf80	5	7	19	26	25	38	13	12	12	1	3	1	2	1	3	1	2	4	1	7	20	13	19	13	29	20	30	5	5	6	4	1	1	1	13	1	4	2	3	4	1	3	1	2	5	2	2	5	3
C2orf81	14	13	15	31	48	49	15	18	27	2	1	1	2	2	2	1	2	4	1	9	16	8	22	22	22	22	23	6	4	11	4	3	1	3	3	1	9	4	2	5	2	3	1	3	3	2	2	3	1
C2orf83	13	8	10	29	26	32	10	9	19	1	1	3	1	1	4	1	1	1	1	8	13	21	13	16	25	18	26	8	6	5	4	5	1	2	9	1	8	5	5	3	4	1	1	3	2	4	3	7	47
C2orf88	20	23	15	53	29	34	12	17	34	6	1	5	15	1	12	12	14	2	1	17	17	10	14	23	38	38	32	11	9	29	7	4	1	5	25	1	19	4	7	2	5	2	6	3	11	2	5	6	1
C2orf91	14	7	13	39	44	40	6	19	18	1	2	3	3	1	2	3	1	1	1	12	15	11	10	19	32	17	21	12	6	7	2	3	1	2	2	1	2	1	6	1	3	1	1	4	2	1	3	6	2
C2orf92	3	7	12	21	16	28	4	5	9	1	1	2	7	1	2	1	1	1	1	6	16	17	19	13	16	12	14	6	2	10	3	2	1	2	4	1	1	1	1	3	1	1	1	2	4	1	1	3	1
C3	12	10	14	43	37	29	26	18	24	35	59	86	68	44	52	39	39	94	67	39	17	17	70	14	50	40	43	13	19	19	5	18	1	14	6	1	24	6	11	3	16	2	15	8	13	2	1	9	3
C3AR1	19	12	16	42	34	51	10	9	19	2	1	1	5	1	11	3	1	2	1	11	25	12	17	22	33	26	39	4	1	9	9	3	1	7	9	1	7	3	4	3	4	2	5	5	6	2	1	6	1
C3orf14	18	12	20	39	39	49	6	7	18	5	1	4	3	1	8	3	1	2	2	7	15	17	17	24	28	31	25	9	8	15	7	6	1	4	9	3	18	2	5	2	1	3	3	7	1	3	4	3	2
C3orf18	4	5	15	28	28	39	9	3	16	1	1	1	2	1	4	1	3	1	1	7	11	8	12	23	16	9	19	6	4	5	6	2	1	1	48	1	2	1	5	3	1	2	2	3	1	1	1	4	2
C3orf20	17	11	21	40	27	42	8	16	21	1	2	1	1	1	7	1	1	1	1	10	16	15	16	21	33	19	19	5	5	5	1	8	1	2	7	1	4	1	4	1	1	1	2	1	5	1	1	5	2
C3orf22	12	13	32	38	60	72	17	19	23	1	1	1	2	1	1	1	1	3	1	12	21	16	24	16	26	20	25	14	7	8	1	2	1	4	15	1	5	3	10	2	1	1	1	3	3	1	1	11	1
C3orf33	17	8	32	38	45	61	9	24	24	3	1	3	1	1	9	2	1	2	1	5	16	13	19	11	27	24	22	9	1	14	9	1	1	2	3	5	2	1	4	1	1	2	1	1	1	1	2	10	1
C3orf35	6	10	11	33	30	35	27	10	14	1	1	2	4	1	3	1	1	1	2	10	11	19	17	16	20	14	23	12	3	10	3	6	1	1	15	1	6	1	3	2	1	1	3	3	1	2	1	5	1
C3orf36	14	18	17	47	37	61	12	17	26	1	6	3	3	1	3	1	1	3	1	12	23	20	15	21	28	18	30	5	2	7	4	7	1	5	6	3	3	2	4	2	1	2	1	1	3	2	5	10	1
C3orf38	16	14	9	34	48	43	5	10	37	3	2	8	3	1	3	4	2	4	3	12	28	18	26	23	24	28	24	11	8	25	2	7	1	2	11	1	13	5	6	7	3	3	5	5	2	1	1	3	1
C3orf49	16	21	21	45	40	43	8	8	24	2	2	3	2	1	4	1	1	1	1	14	13	16	15	13	34	15	27	5	7	3	3	2	1	2	9	1	4	1	7	3	1	4	1	5	2	5	2	2	1
C3orf52	26	8	31	39	55	154	11	28	30	2	8	24	1	6	4	1	1	19	6	11	73	28	28	38	39	29	74	35	6	63	16	12	1	9	15	5	5	14	12	39	6	27	2	7	2	2	2	10	1
C3orf56	19	15	12	48	42	49	9	24	25	3	2	3	6	1	1	1	1	1	2	13	13	17	29	17	33	25	29	6	2	7	6	1	1	2	14	2	5	2	4	5	1	3	2	6	2	2	1	4	4
C3orf62	11	9	18	37	26	27	10	11	20	4	1	1	3	2	2	2	1	2	3	6	21	19	15	21	31	29	31	12	7	14	6	4	1	1	12	3	4	2	7	3	1	4	1	4	3	1	3	2	2
C3orf70	15	15	12	32	33	33	12	12	26	4	3	1	4	1	3	1	1	1	2	5	13	10	16	19	26	21	21	8	3	14	3	3	1	2	5	1	3	1	1	5	1	1	4	3	5	3	2	5	3
C3orf80	23	16	27	29	47	62	14	17	24	1	1	4	1	1	6	3	1	2	1	8	19	20	14	20	23	14	35	6	5	9	7	1	1	2	9	3	5	1	6	1	4	1	3	3	2	3	1	7	1
C3orf84	14	6	7	31	31	32	10	13	18	1	1	1	1	1	10	1	1	1	1	9	14	9	19	15	22	25	24	11	5	10	8	2	1	2	6	1	9	3	5	4	2	2	4	5	1	2	1	4	1
C3orf85	6	8	15	24	29	35	7	11	8	1	1	1	1	1	3	1	1	1	1	5	9	14	11	11	31	19	19	2	4	8	8	4	1	2	4	1	3	2	2	1	1	1	1	5	1	1	1	7	2
C4B	92	55	90	163	231	277	44	92	79	6	6	6	25	2	4	6	5	16	22	38	59	58	58	52	55	32	65	26	47	28	15	19	1	22	9	3	37	9	30	5	10	2	9	15	34	3	2	7	9
C4BPA	12	8	8	31	31	42	8	12	19	2	2	1	4	1	7	1	1	1	1	11	12	11	18	24	27	28	25	8	7	10	6	3	1	2	13	3	8	1	1	6	1	2	2	2	3	1	1	4	2
C4BPB	30	17	38	50	48	67	13	28	28	1	4	2	2	2	8	3	1	3	2	11	50	31	38	41	36	35	55	66	5	153	28	4	1	3	28	1	7	33	7	34	3	4	1	8	6	4	1	6	1
C4orf17	43	26	43	66	92	153	27	35	55	5	3	4	4	1	7	3	2	13	2	8	26	25	26	34	31	32	44	22	8	31	10	6	1	2	15	2	8	8	1	13	4	2	6	7	2	2	2	7	1
C4orf19	14	7	28	43	44	55	8	15	23	1	9	18	2	5	2	1	1	10	7	6	36	17	20	18	31	19	36	17	6	29	6	6	1	3	18	2	3	10	1	8	3	5	1	8	2	2	1	3	2
C4orf3	32	29	45	114	90	134	28	40	60	15	3	12	17	3	18	7	9	20	7	29	45	29	40	34	49	24	48	32	23	49	21	19	1	13	15	1	25	23	27	18	11	17	9	14	11	3	4	13	3
C4orf33	10	9	17	33	46	37	7	10	17	2	1	1	7	1	1	1	1	1	2	13	18	11	16	19	17	23	18	9	4	15	11	3	1	5	9	1	4	3	4	3	1	1	2	5	1	1	2	3	1
C4orf36	10	7	19	44	39	38	6	17	20	2	1	2	2	2	1	2	1	3	1	9	22	17	15	21	31	26	21	7	5	11	9	1	1	3	15	6	8	1	4	5	5	1	2	5	2	4	4	7	1
C4orf45	3	2	1	9	7	18	7	2	6	1	1	1	4	1	1	2	2	1	1	4	5	5	5	9	15	12	8	1	3	8	4	1	1	4	3	1	3	1	1	3	1	1	1	5	1	3	3	8	6
C4orf46	124	65	118	148	431	553	131	110	120	3	9	11	9	2	5	3	1	13	7	30	65	58	76	79	70	47	117	38	17	51	15	13	1	7	18	3	10	11	13	16	8	13	6	20	6	3	5	11	2
C4orf47	9	12	10	26	22	19	6	11	10	2	1	3	3	1	1	1	1	1	1	7	12	10	18	11	23	19	19	5	4	10	5	4	1	1	8	1	5	2	1	1	3	3	2	1	2	3	3	5	1
C4orf48	24	12	19	42	40	50	10	11	15	1	1	6	1	1	3	1	2	4	1	8	19	18	18	27	28	16	30	10	4	26	9	6	1	2	18	1	10	6	5	5	1	7	3	8	3	3	3	9	3
C4orf50	11	10	10	34	25	35	8	15	23	1	2	2	9	1	1	4	1	2	1	11	17	14	20	19	31	16	29	6	5	9	7	1	1	2	8	1	5	1	6	2	1	5	2	5	5	1	2	6	4
C4orf51	59	35	60	102	157	255	42	52	61	2	10	9	2	6	8	3	1	7	5	28	56	52	75	42	40	33	73	23	8	38	6	13	1	5	10	2	19	10	9	15	5	11	3	11	2	7	6	6	5
C4orf54	18	9	14	39	33	40	5	14	21	1	2	1	3	1	3	1	1	1	1	8	9	10	13	16	20	19	20	2	1	11	1	4	1	1	8	1	5	1	3	1	2	1	2	2	2	4	3	4	2
C5	21	8	19	34	31	32	17	11	11	6	1	3	2	1	1	1	1	4	2	1	11	6	4	12	17	18	12	5	3	5	5	1	1	2	178	1	3	2	6	3	3	1	1	3	1	1	1	1	2
C5AR1	22	14	15	37	36	50	20	16	35	10	1	3	16	1	17	11	12	1	1	21	18	22	23	24	35	21	29	10	9	4	5	4	1	8	9	5	8	2	8	11	9	3	1	6	4	3	5	5	2
C5AR2	11	13	11	30	24	41	6	11	17	2	1	2	1	1	3	1	1	1	1	5	13	10	14	9	22	21	25	3	1	7	1	3	1	2	4	2	3	2	3	4	1	1	4	1	3	2	1	2	4
C5orf15	28	22	46	68	118	119	18	36	33	12	15	22	15	9	11	4	7	23	21	28	52	33	42	33	45	40	59	31	17	64	17	29	1	14	17	3	17	13	14	22	17	14	8	21	10	5	7	6	1
C5orf22	3	8	20	25	38	43	10	11	11	1	3	3	4	1	2	1	1	6	1	13	23	9	20	17	15	12	20	8	2	23	8	6	1	1	6	1	4	4	3	7	1	9	1	9	1	4	7	10	5
C5orf24	14	11	33	66	50	44	17	16	18	5	10	6	7	2	6	4	2	11	6	18	24	22	23	19	26	34	34	16	8	41	5	8	1	6	12	1	20	12	9	11	11	6	8	6	3	3	2	1	8
C5orf34	11	17	21	40	37	38	12	9	22	5	1	1	3	1	6	1	1	2	1	12	11	21	21	17	29	19	23	8	3	10	3	3	1	5	7	1	7	1	3	1	3	1	1	4	3	1	1	4	1
C5orf38	98	50	237	450	540	420	49	94	78	2	6	8	5	2	6	3	2	24	3	27	107	99	98	123	82	54	169	53	16	43	33	24	1	17	24	2	17	12	8	16	9	4	8	40	13	4	4	13	5
C5orf46	15	3	14	28	24	39	6	13	17	1	3	3	1	1	3	1	2	1	1	8	7	5	11	8	16	17	16	11	2	12	5	6	1	2	7	1	4	1	3	1	1	1	1	2	1	2	1	5	1
C5orf47	17	11	14	36	66	40	5	16	17	1	1	1	4	1	6	1	1	1	1	14	14	16	13	17	25	30	24	7	5	6	7	8	1	3	4	2	1	4	4	2	4	1	3	2	5	4	3	5	3
C5orf49	16	9	15	28	42	25	5	7	15	2	1	1	1	1	3	1	1	2	5	8	9	12	13	16	12	17	19	4	3	6	4	1	1	2	5	1	6	2	5	1	1	1	3	5	2	1	1	3	2
C5orf51	20	18	34	82	96	113	15	29	43	3	3	6	2	1	8	2	4	6	3	15	27	20	28	36	48	35	43	8	12	29	11	9	1	5	21	4	8	9	5	14	2	4	4	9	4	4	4	9	2
C5orf52	7	8	8	29	30	28	9	9	19	3	2	1	4	1	1	1	1	1	1	4	14	8	12	17	23	17	28	8	5	9	4	1	1	1	5	2	2	3	5	1	1	2	1	3	1	3	2	1	2
C5orf58	7	7	10	29	18	39	5	8	21	1	1	1	4	1	1	1	1	1	1	10	13	16	8	17	31	21	24	5	2	10	4	6	1	1	12	1	5	1	2	2	1	3	2	1	2	2	1	3	1
C5orf60	8	7	17	31	28	43	9	8	17	1	1	2	5	1	1	1	1	1	1	11	16	23	10	17	23	33	23	13	1	8	3	2	1	4	11	1	6	1	2	3	1	1	5	1	1	3	2	7	4
C5orf63	16	16	22	45	49	51	13	16	14	1	1	3	2	1	4	1	1	7	1	12	20	11	15	22	26	19	25	12	8	24	9	7	1	2	25	1	2	4	5	6	2	2	1	6	5	2	2	8	1
C5orf67	7	4	8	22	22	25	6	14	13	1	2	3	3	1	3	1	1	1	1	8	7	12	15	19	19	18	13	6	1	5	1	3	1	2	1	1	3	3	4	1	1	2	4	3	1	2	5	10	1
C6	72	31	120	141	145	247	40	67	70	2	2	6	5	2	7	1	1	5	2	15	35	39	69	29	48	29	55	22	8	36	15	7	1	1	9	3	7	12	10	12	5	6	3	7	1	3	3	6	1
C6orf118	10	3	11	36	26	31	3	11	14	1	1	2	3	2	3	1	1	1	1	7	12	16	18	13	36	15	25	5	2	6	5	3	1	3	7	1	3	2	7	3	4	3	1	3	2	4	2	9	2
C6orf120	11	9	4	22	17	30	10	6	16	3	2	4	1	1	2	1	1	5	2	7	11	14	13	13	23	14	18	5	1	16	3	2	1	5	9	1	2	1	3	2	1	4	2	1	1	1	1	1	1
C6orf132	25	3	20	35	36	67	11	22	17	3	21	21	4	21	6	1	1	21	18	9	29	29	32	28	19	14	32	17	2	46	6	17	1	2	17	1	9	9	2	15	2	11	1	11	1	1	3	8	1
C6orf136	21	9	16	39	54	49	10	6	14	2	2	5	8	3	3	1	1	4	2	9	19	11	17	20	23	20	27	15	10	28	16	4	1	2	14	2	10	7	6	4	1	3	2	2	1	4	4	5	1
C6orf141	28	18	34	33	71	108	5	29	28	1	6	6	5	2	6	1	1	5	5	6	18	19	24	19	27	19	18	11	6	16	10	6	1	1	7	1	7	1	4	3	1	1	1	3	1	2	2	3	1
C6orf15	11	12	15	47	52	41	11	17	24	1	3	1	3	1	4	1	1	1	1	6	19	20	25	27	23	22	25	7	4	9	7	6	1	1	9	2	5	4	5	5	2	2	1	7	4	2	1	4	2
C6orf163	16	10	17	30	38	34	9	13	23	1	1	2	2	1	4	1	3	1	1	12	15	10	12	17	38	26	20	4	7	7	1	3	1	1	6	1	3	1	3	1	1	4	1	1	2	1	1	2	3
C6orf201	12	15	17	36	36	43	9	16	21	1	1	1	6	1	3	1	1	3	1	4	12	11	13	18	31	13	16	6	2	9	1	3	1	3	7	1	7	2	5	2	1	3	3	2	1	1	2	4	1
C6orf223	23	9	12	30	35	38	5	26	18	1	6	10	1	1	6	1	1	6	5	8	35	15	23	16	30	16	35	11	7	9	3	2	1	6	12	1	4	2	4	2	1	1	1	5	2	2	1	8	3
C6orf226	9	11	10	22	40	32	7	10	14	3	1	1	2	1	4	1	2	1	1	11	16	20	18	21	26	24	21	6	5	4	6	5	1	3	16	2	7	3	5	7	1	1	3	2	2	2	3	7	1
C6orf47	10	5	14	37	31	42	8	12	14	1	3	8	3	4	9	1	1	7	1	10	22	20	29	15	18	16	22	6	8	14	4	4	1	2	6	2	7	5	7	5	3	3	1	6	4	2	2	8	3
C6orf52	15	14	18	54	43	62	8	20	27	1	1	2	1	1	6	1	1	1	3	13	12	18	17	23	33	21	25	10	2	6	2	5	1	3	7	2	6	6	2	1	3	1	1	2	4	2	1	7	1
C6orf58	20	9	26	49	48	57	19	19	29	1	1	2	3	1	3	1	1	2	1	7	13	19	14	15	30	33	29	6	2	7	6	1	1	4	4	2	4	4	6	7	4	1	2	3	1	3	3	4	1
C6orf62	10	24	44	77	85	119	12	17	50	23	26	29	21	15	14	7	4	30	16	35	40	32	43	32	36	27	31	33	15	87	13	8	1	6	30	1	16	17	16	18	10	10	5	7	13	2	5	13	3
C6orf89	8	19	11	41	29	48	10	4	13	1	2	3	1	1	1	1	1	4	1	9	15	22	18	15	28	21	29	7	5	11	6	1	1	2	8	1	2	1	3	3	2	1	4	1	5	2	3	7	1
C7	25	25	44	115	66	119	17	17	32	2	2	4	28	2	7	4	4	4	3	24	24	21	19	22	37	26	35	15	32	16	3	6	1	9	15	4	30	2	6	6	5	5	2	10	14	1	1	2	4
C7orf25	5	10	20	44	43	36	10	16	24	1	3	5	2	1	2	1	1	2	1	12	19	16	20	17	17	25	31	8	5	68	2	6	1	7	9	1	2	3	3	3	1	2	1	4	4	4	1	9	1
C7orf26	15	15	11	41	42	40	7	10	18	2	5	6	4	5	4	2	2	6	1	6	15	9	15	21	31	18	21	15	7	18	12	4	1	4	9	1	9	3	5	5	3	5	1	4	6	2	4	4	2
C7orf31	32	17	31	69	75	121	20	29	27	4	4	5	2	1	4	2	1	6	1	8	29	33	31	36	35	31	39	13	6	25	12	3	1	3	8	2	7	7	8	4	6	3	2	4	3	1	3	3	1
C7orf33	33	20	34	50	70	85	18	28	34	2	3	1	3	1	7	1	1	2	1	14	22	27	24	25	32	25	42	7	11	17	8	4	1	3	7	1	7	6	6	4	5	1	2	6	3	2	10	9	1
C7orf50	26	24	46	68	110	166	23	36	53	8	9	15	15	5	5	1	5	10	9	20	43	27	36	38	37	31	43	23	13	41	16	19	1	13	20	2	26	6	7	8	8	6	5	11	9	3	3	8	6
C7orf57	13	6	19	37	31	45	6	13	27	2	1	1	2	3	3	1	1	1	1	9	17	14	12	18	23	18	28	10	6	8	9	7	1	1	9	1	2	2	7	2	1	1	1	6	1	3	1	3	3
C7orf61	8	17	20	47	48	48	11	15	26	4	2	3	2	1	4	2	2	1	2	7	19	20	8	16	40	16	21	8	3	10	6	5	1	2	2	2	5	3	7	3	2	2	4	6	1	1	1	10	2
C7orf77	16	13	30	39	44	56	8	10	30	1	1	1	2	1	2	3	1	5	1	16	13	17	16	22	50	15	35	8	9	16	2	4	1	5	6	1	5	1	7	1	1	3	1	3	2	1	2	7	3
C8A	12	8	8	34	22	32	5	13	24	2	1	3	1	1	3	1	2	1	1	9	17	12	8	21	24	18	20	8	1	10	8	2	1	3	10	1	8	4	5	5	3	1	1	3	3	1	3	4	3
C8B	10	11	13	31	29	51	5	19	22	1	2	2	4	1	2	1	1	1	1	6	14	20	19	22	34	19	28	10	5	5	6	3	1	1	33	3	3	2	3	3	1	1	4	5	2	1	1	2	3
C8G	12	9	9	35	16	19	5	10	12	1	1	1	4	1	1	1	1	1	3	6	19	19	12	16	18	24	27	9	3	6	8	3	1	1	7	2	5	1	3	6	4	2	2	1	1	1	2	8	3
C8orf33	15	8	16	42	27	44	9	11	22	1	5	3	5	1	4	1	1	6	1	9	21	28	17	14	30	28	25	12	7	25	4	5	1	5	9	2	4	5	4	5	1	2	5	5	3	3	3	8	2
[truncated: 16,817 more rows]
[truncated: 102 more columns]
